# Supplementary material for: Google Health Trends performance reflecting dengue incidence for the Brazilian states
Source: PubMed Central journal article supplement (PMC7104526; doi:10.1186/s12879-020-04957-0), 2020-03-26

# Google Health Trends performance reflecting dengue incidence for the Brazilian states

Daniel Romero-Alvarez, Nidhi Parikh, Dave Osthus, Kaitlyn Martinez, Nicholas Generous, Sara del Valle, Carrie A. Manore

**Additional file:** Plots of multiple and simple linear models between Google Health Trends data and weekly dengue incidence for Brazil

# Brazil (BR)

## Dengue incidence vs. Google Health Trends (2011–2016)

### Definitions:

- **Combined terms:**
  - **All:** model with all the available terms.  $n =$  number of terms
  - **Four:** model with "dengue", "dengue sintomas", "aedes", and "mosquito".
  - **Uncorrelated:** model with non-correlated terms.  $n =$  number of uncorrelated terms
- **Individual terms:** Plots developed with one term at a time.
- Terms for all and uncorrelated models can be found in additional file 3.

**Combined terms**  
**Adjusted R squared**

**Brazil**

All  
(n = 14)

BR-BR  
Adj. R squared = 0.8887159

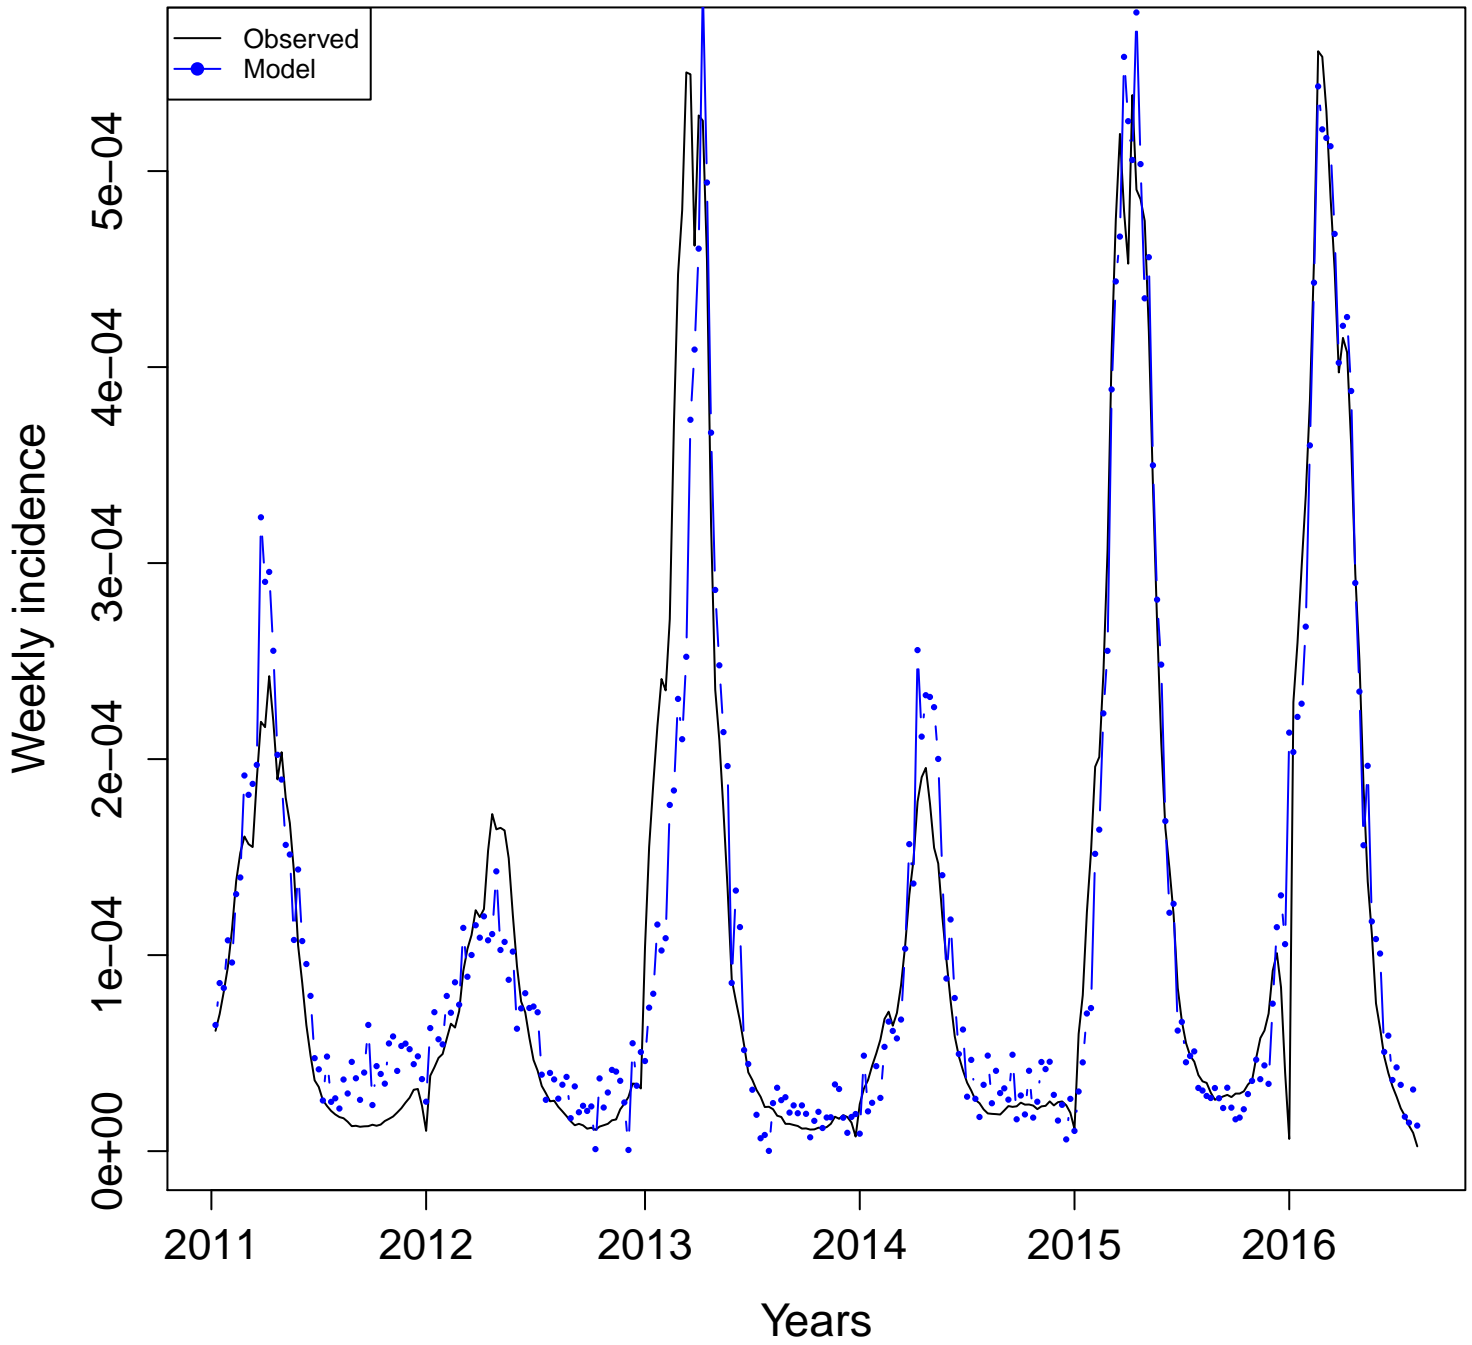

BR  
Adj. R squared = 0.8501

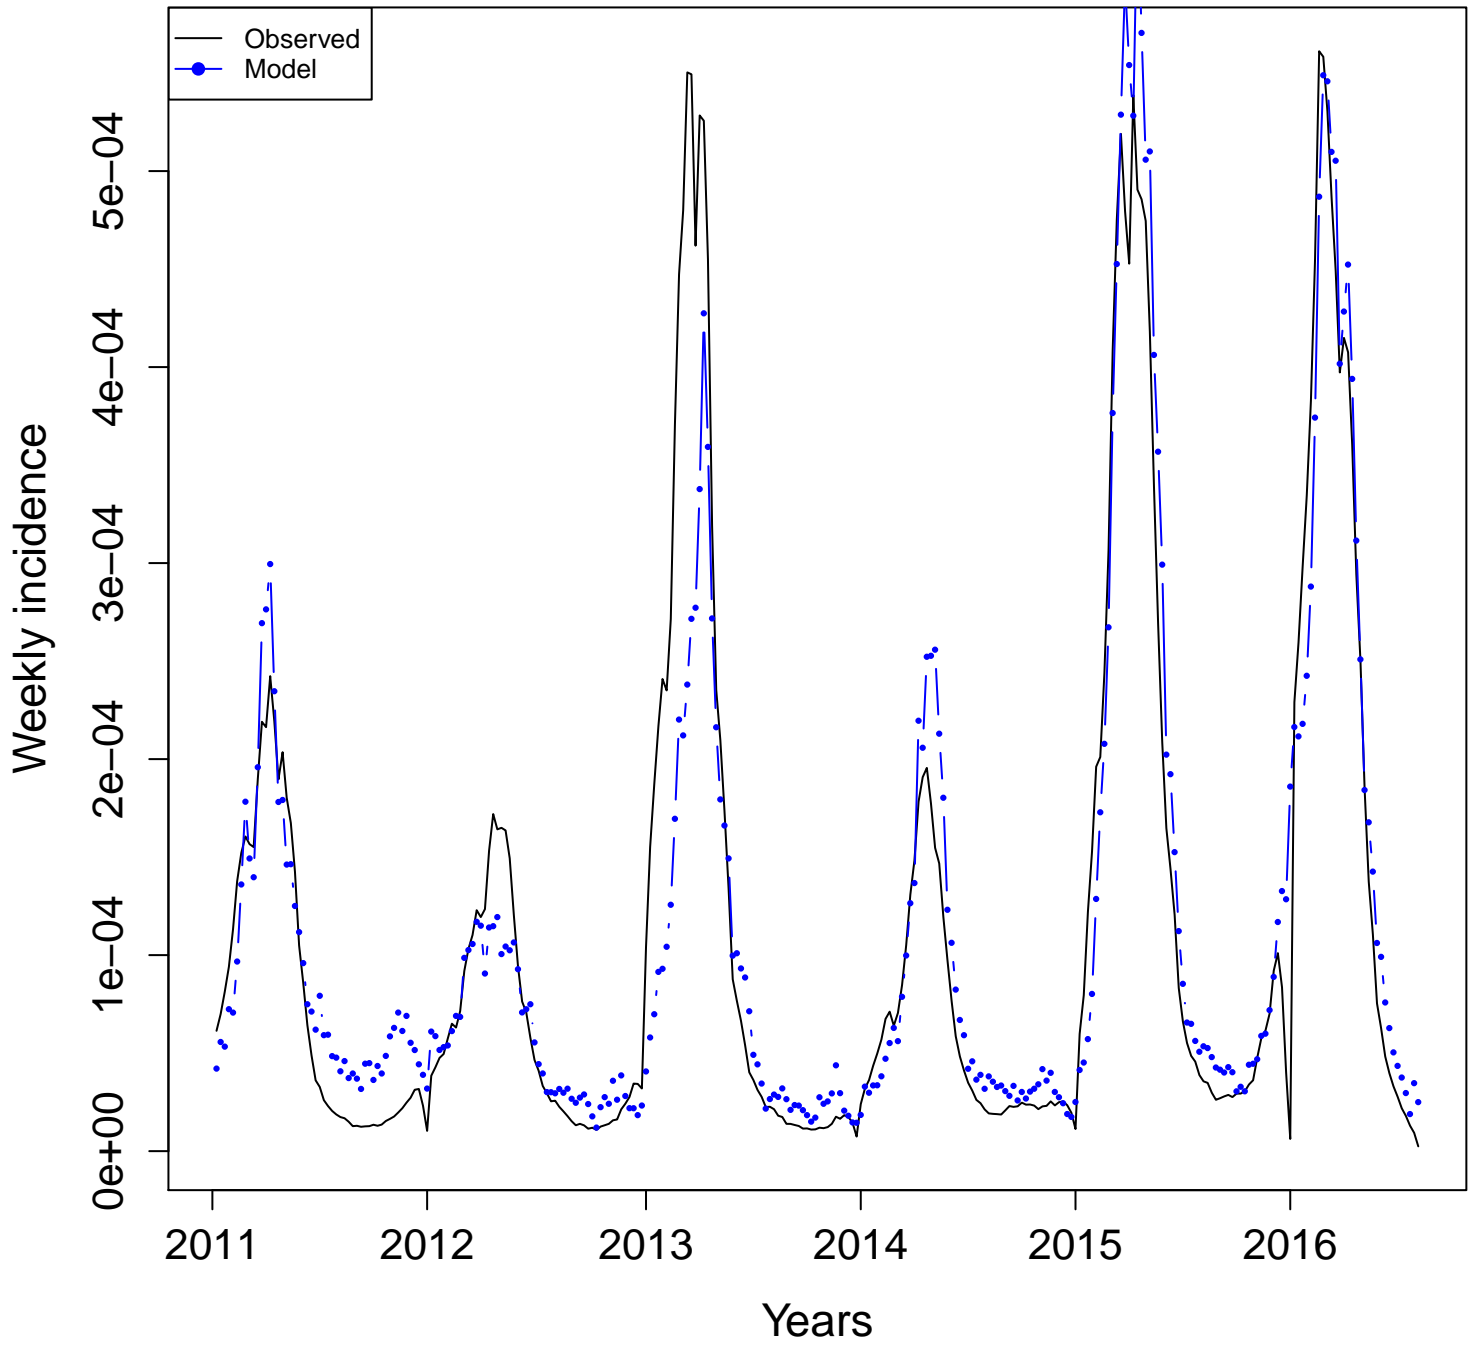

**Uncorrelated  
(n = 7)**

**BR-BR  
Adj. R squared = 0.8518958**

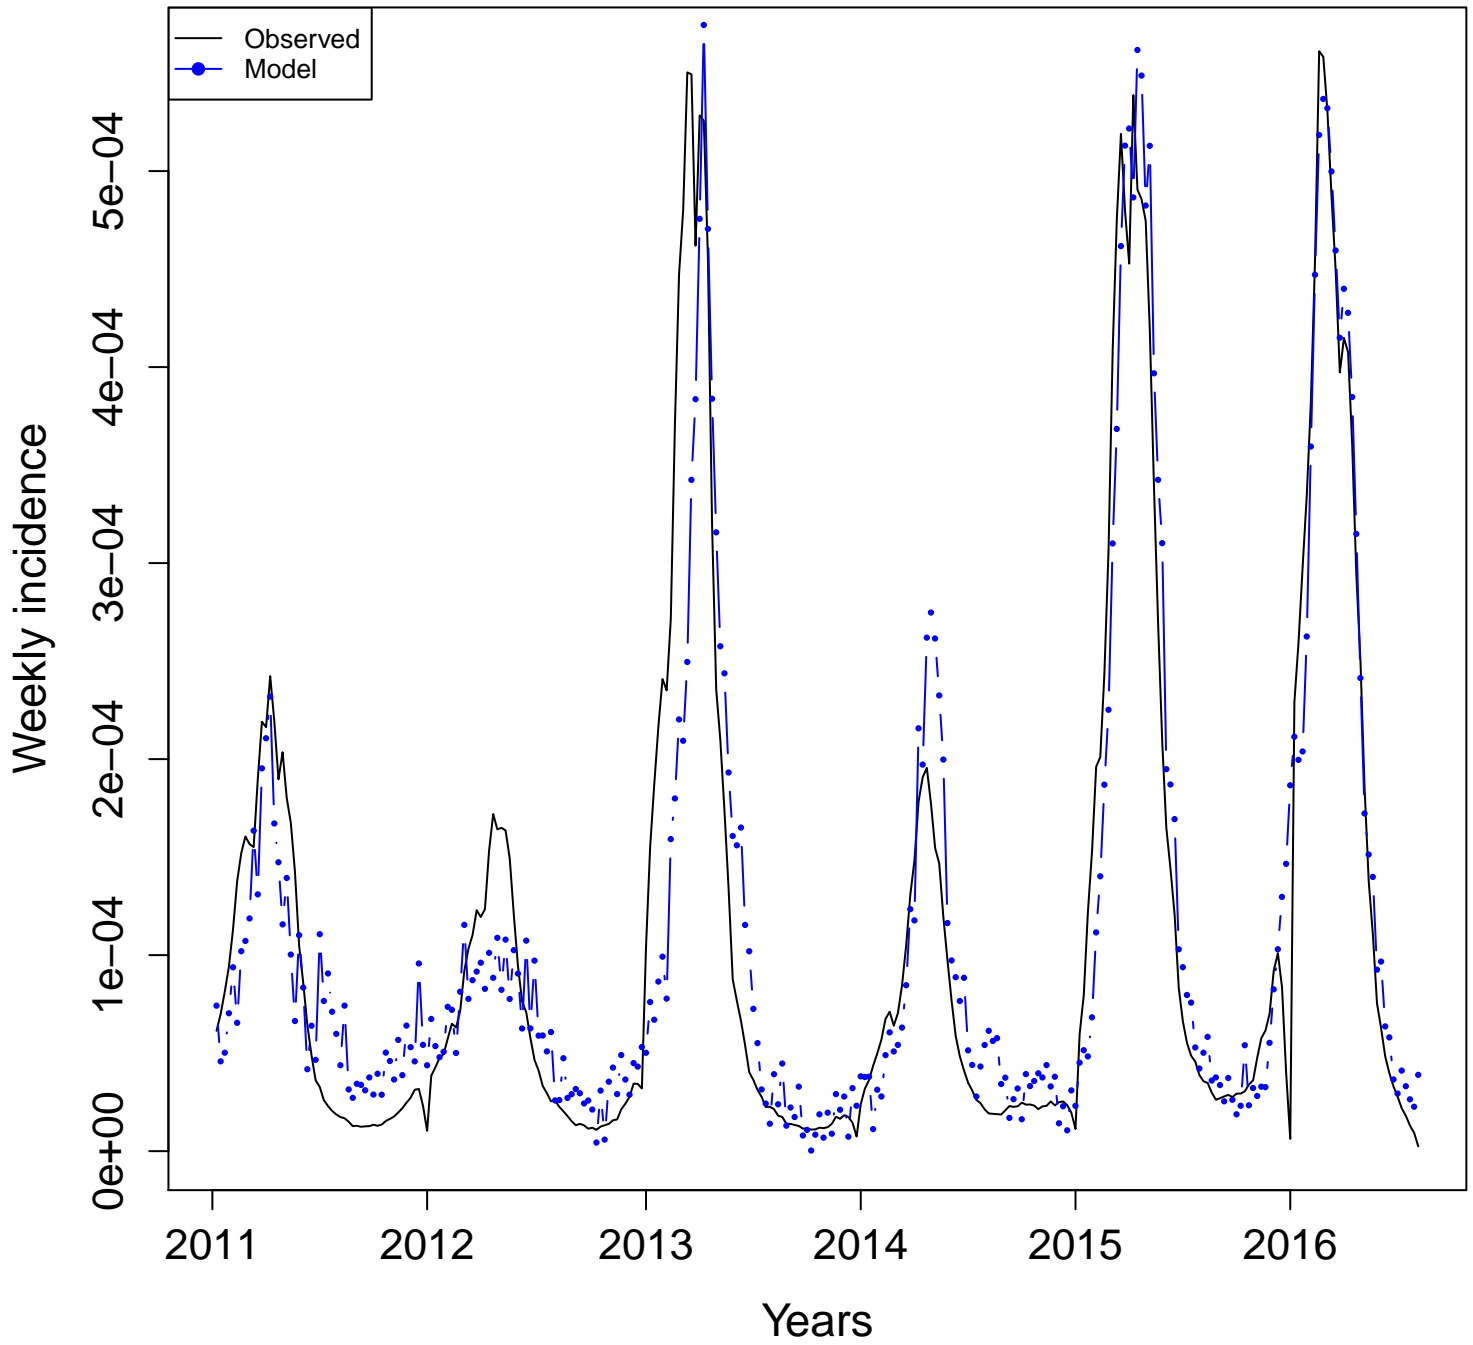

**Individual terms**  
**Adjusted R squared**

**Brazil**

**BR- aedes**  
**Adj. R squared = 0.2877**

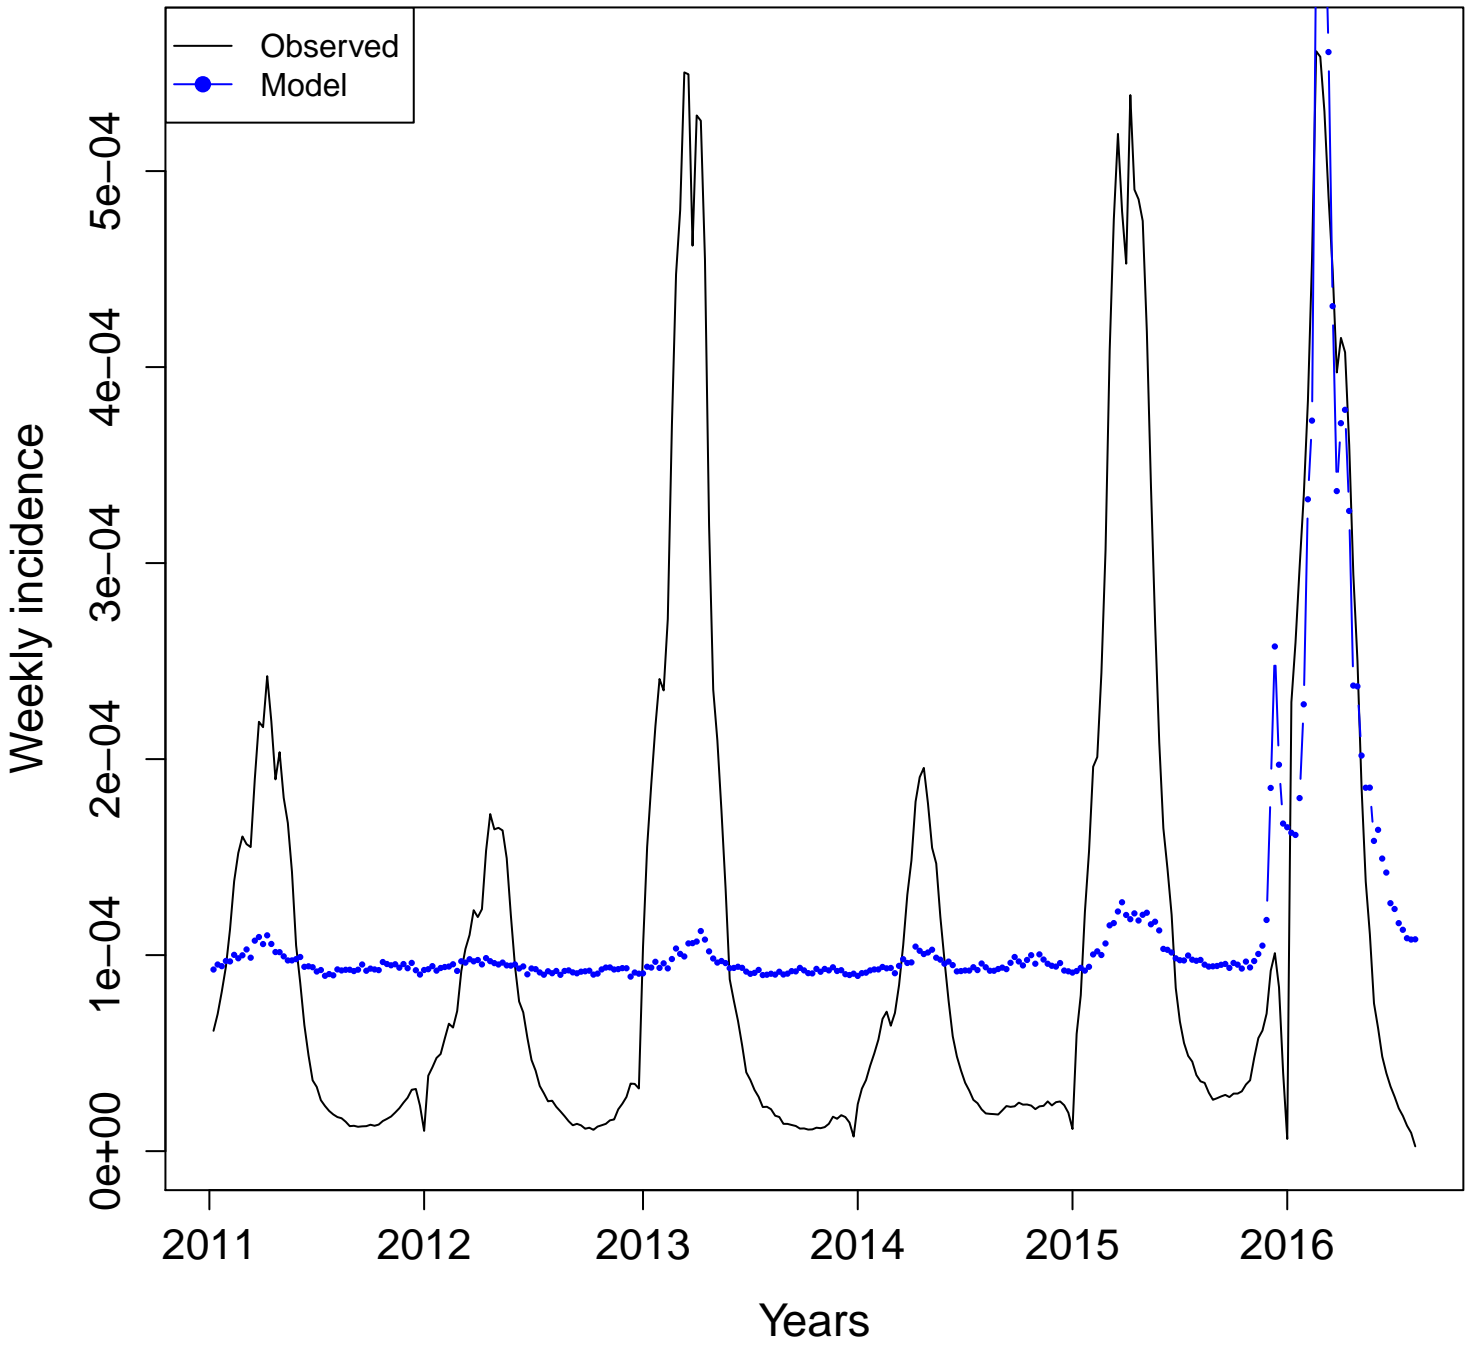



**BR- aedes.aegypti**  
**Adj. R squared = 0.289**

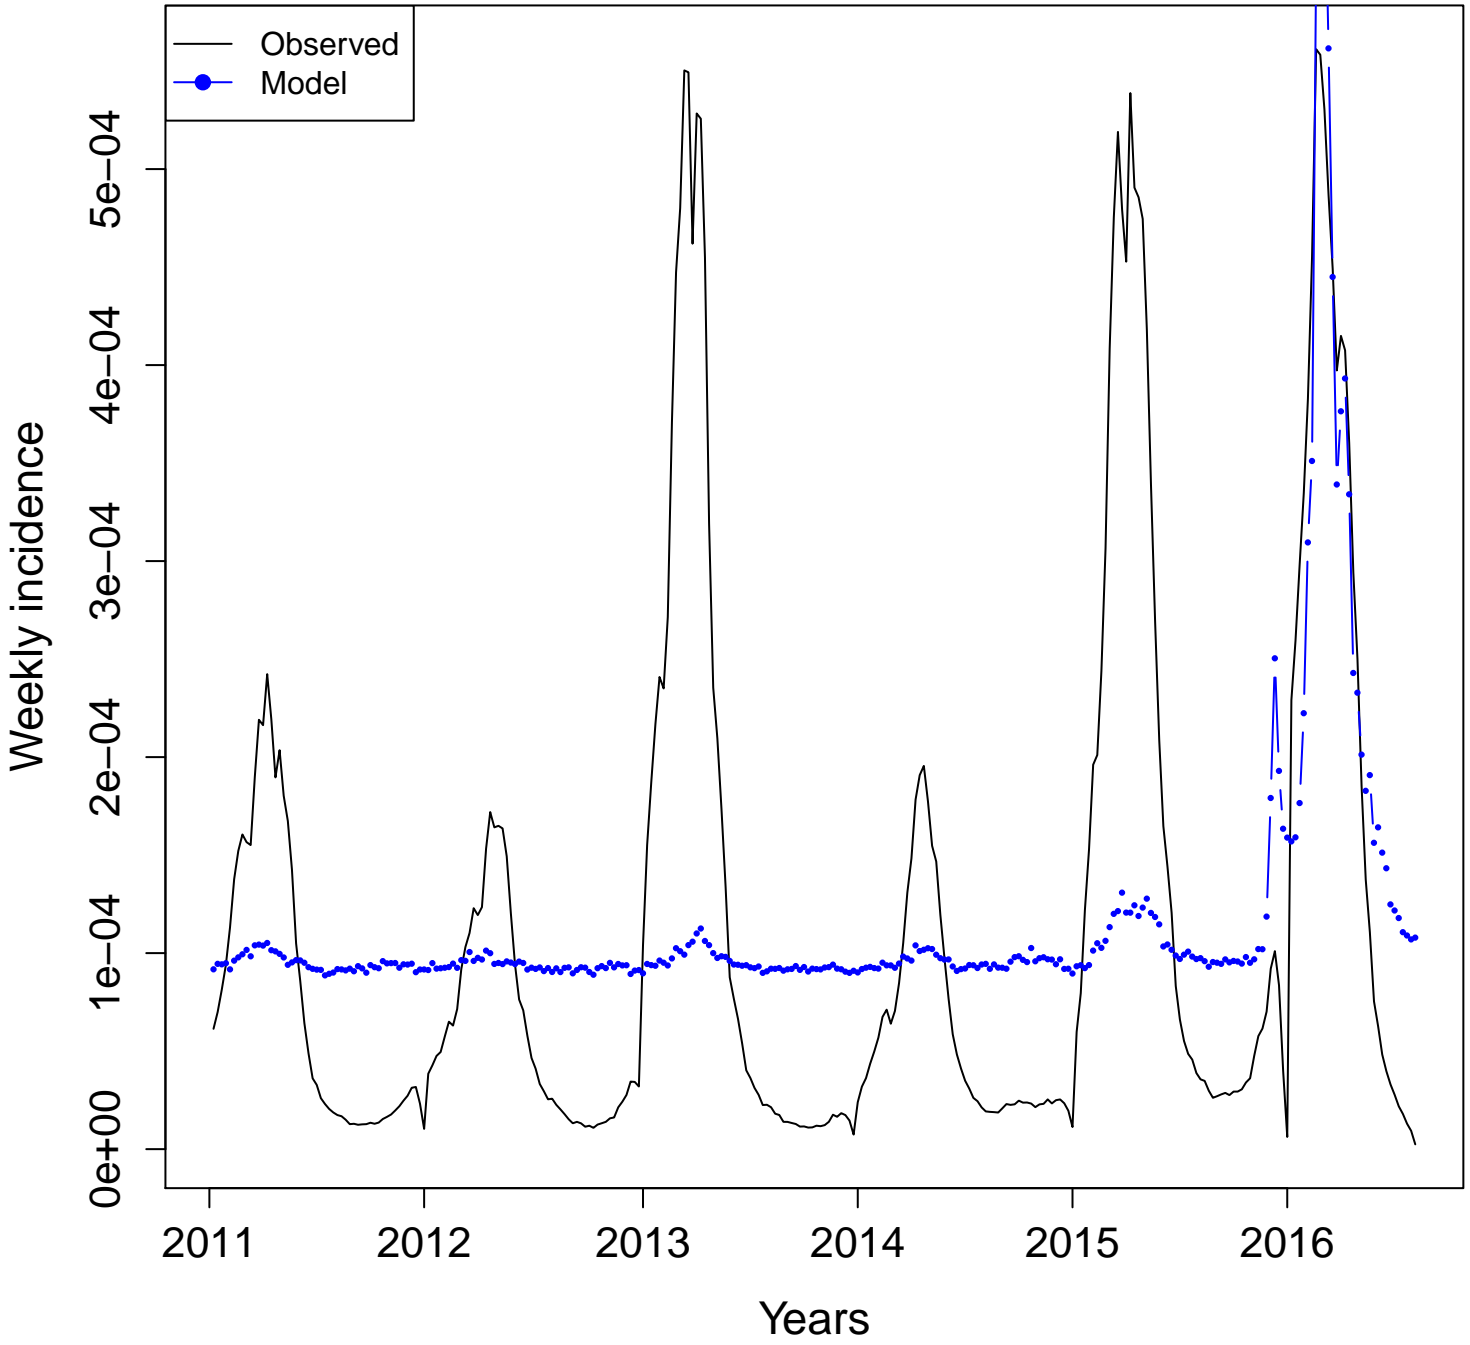

**BR- aegypti**  
**Adj. R squared = 0.2887**

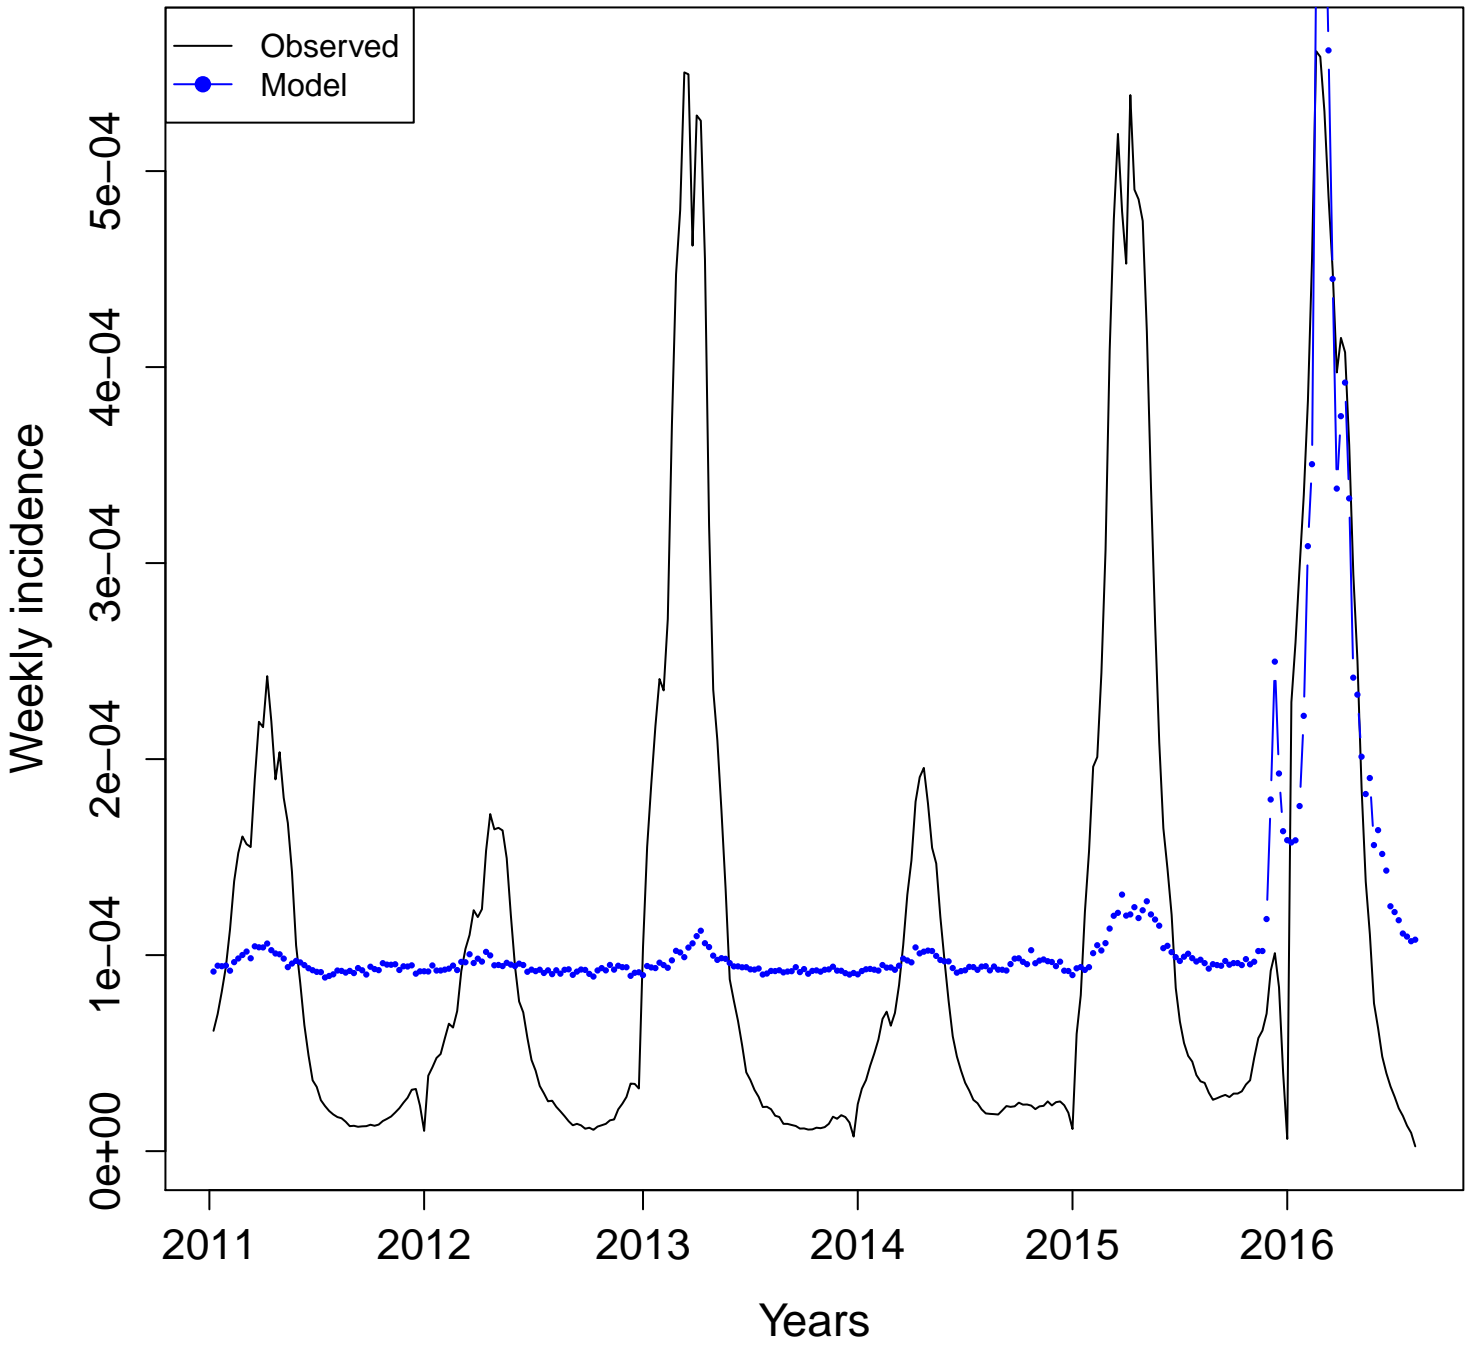

# BR- dengue

Adj. R squared = 0.7894

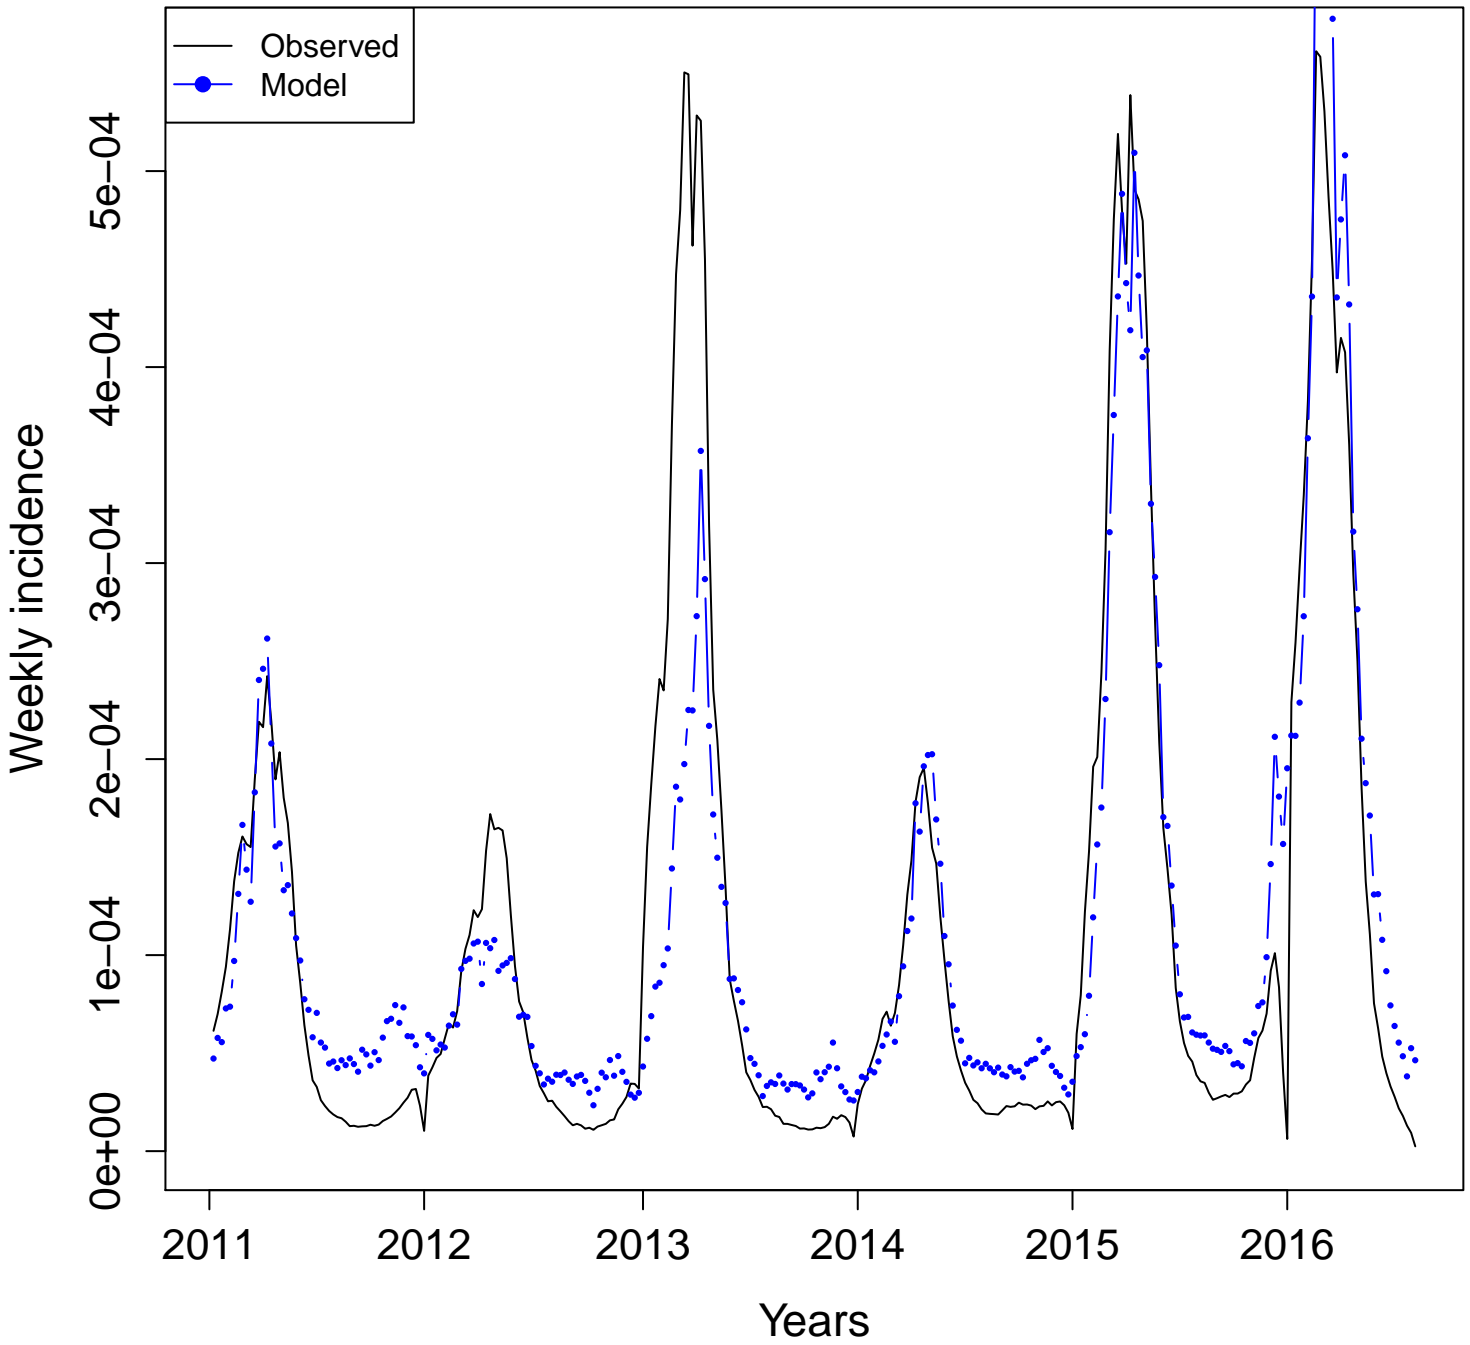

**BR- dengue.fever**  
**Adj. R squared = 0.2713**

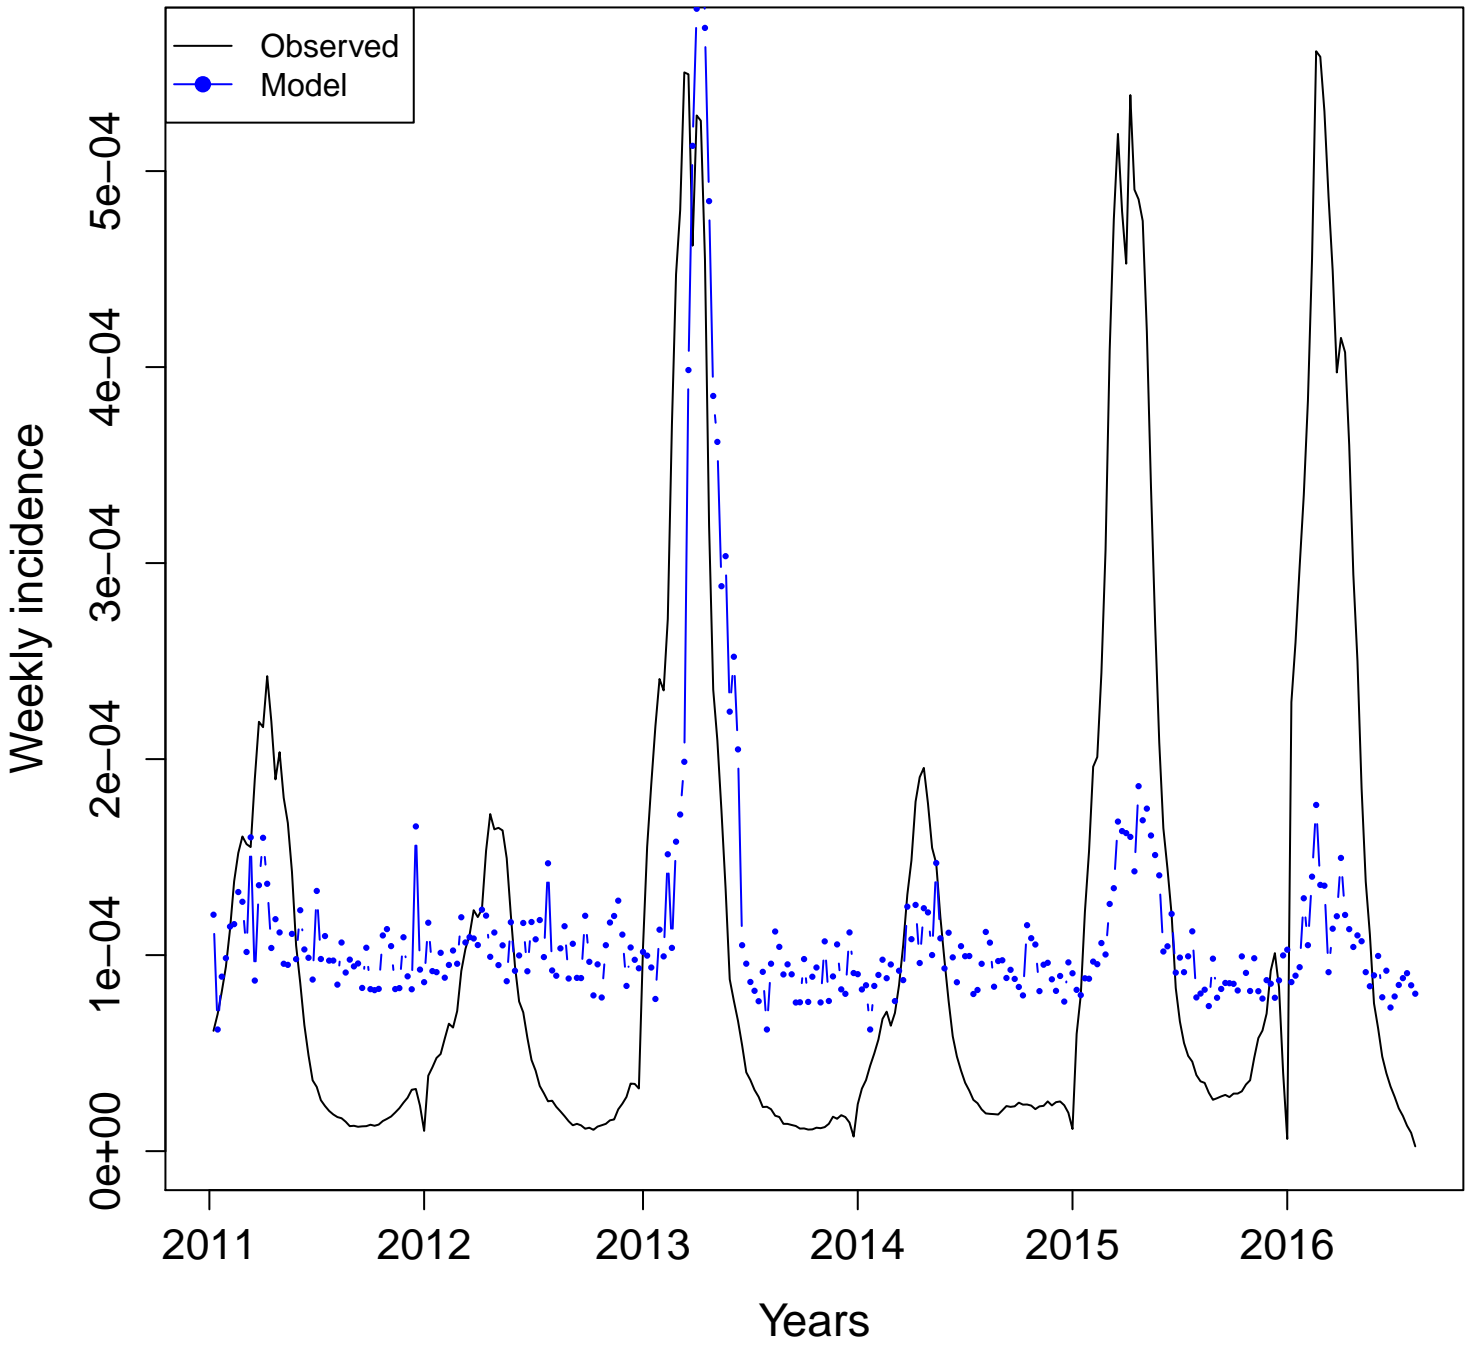

**BR- dengue.hemorrhagic.fever**  
**Adj. R squared = 0.1018**

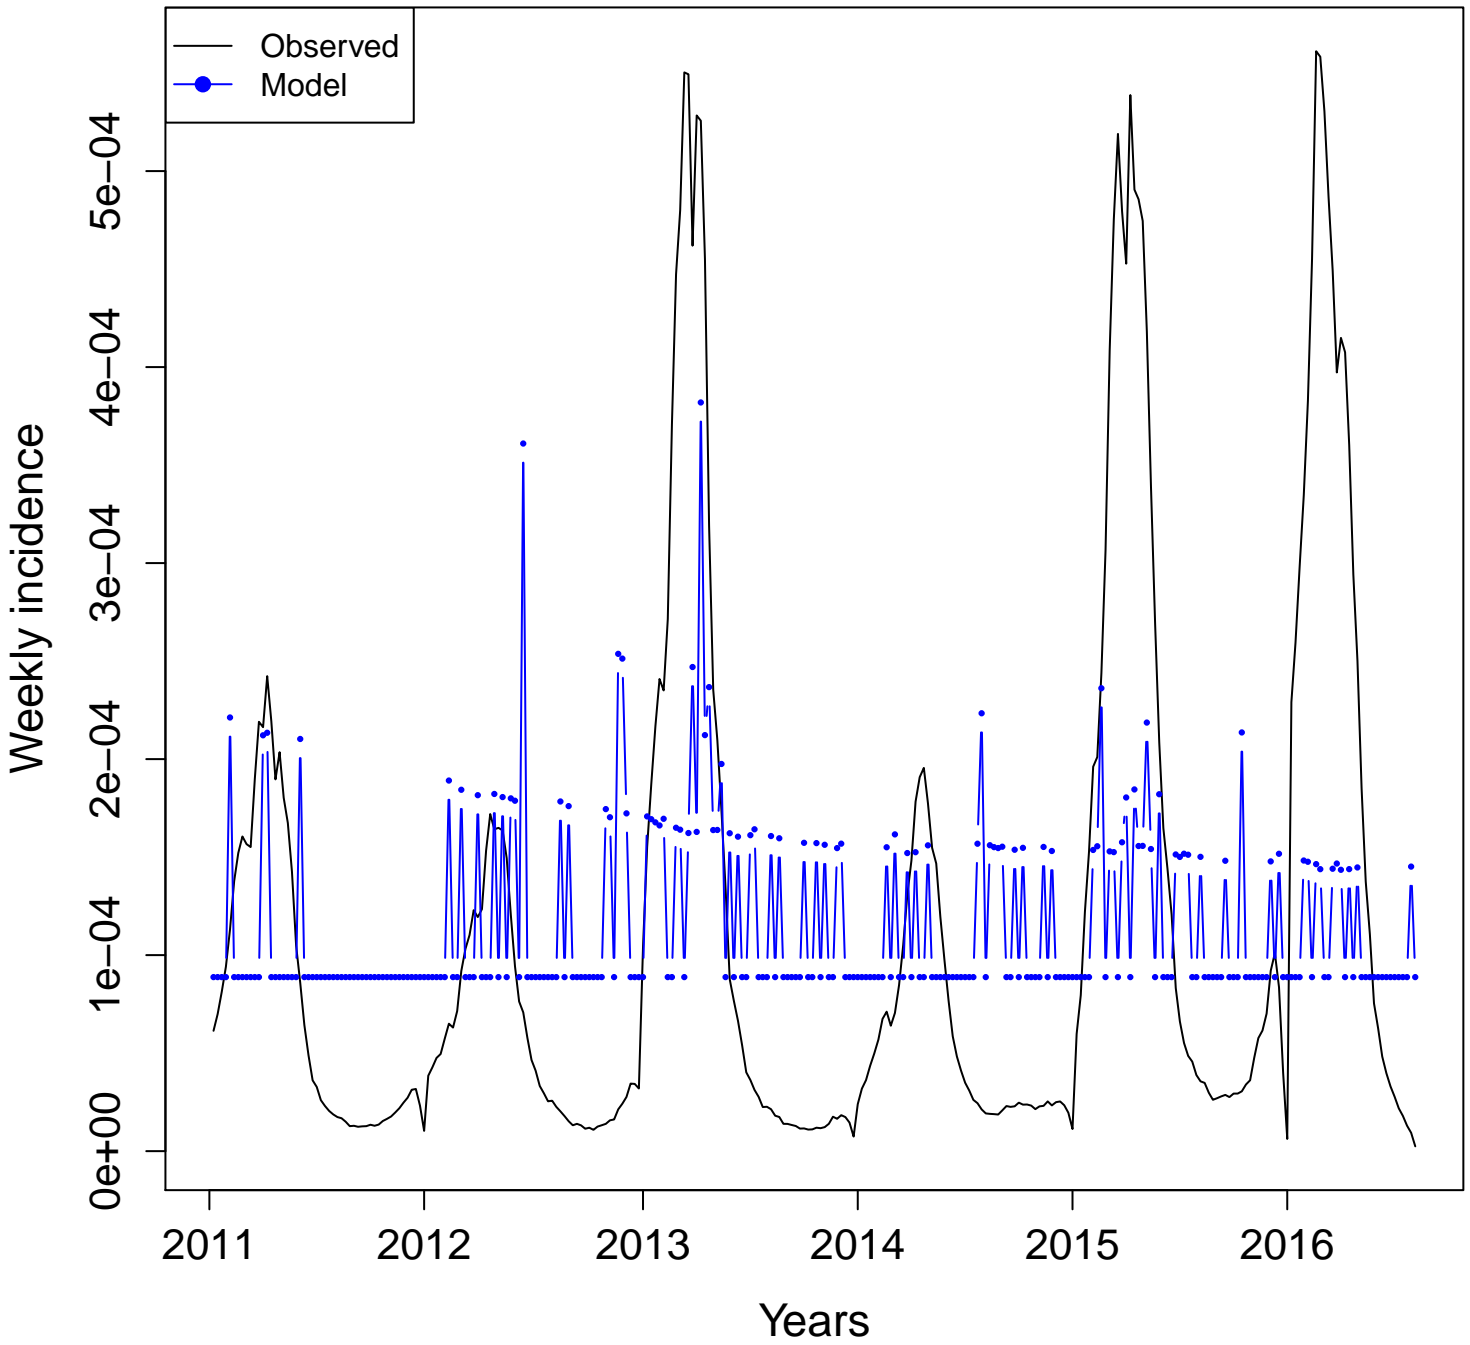

**BR- dengue.sintomas**  
**Adj. R squared = 0.8379**

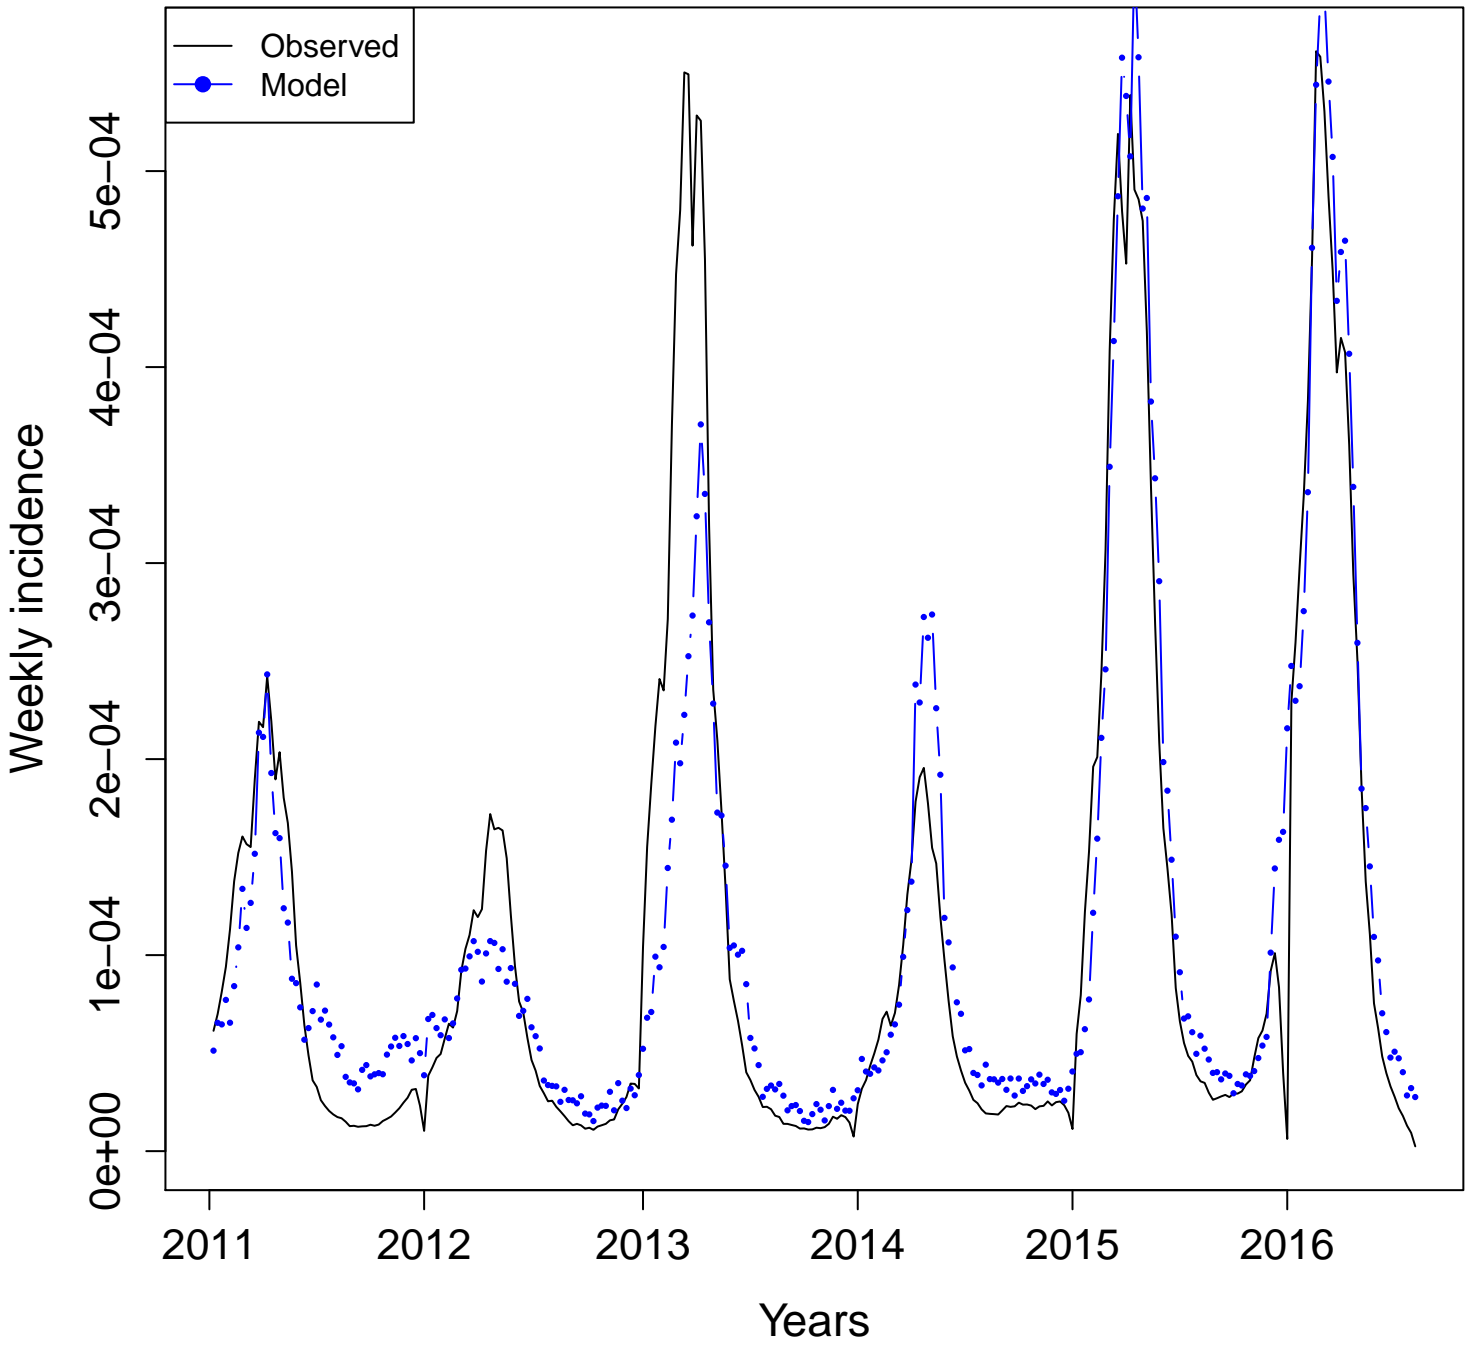

**BR- dengue.virus**  
**Adj. R squared = 0.3675**

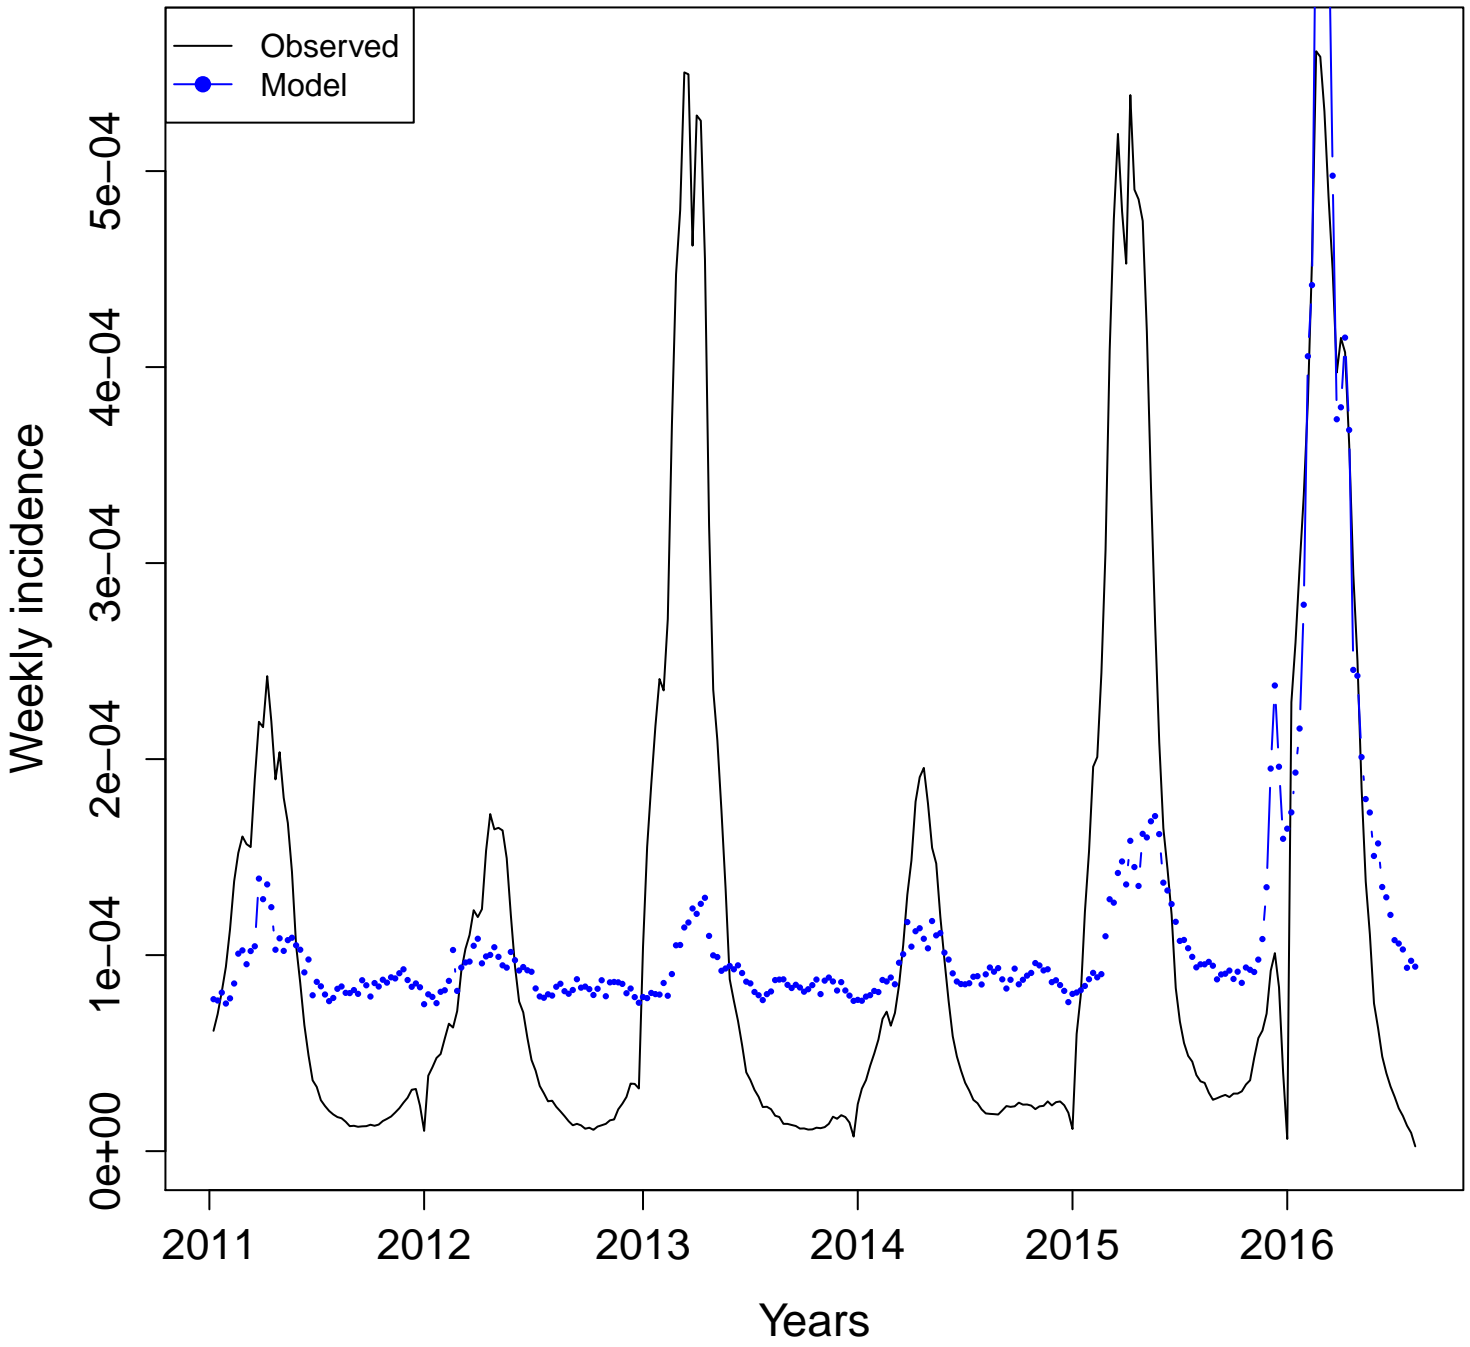

# BR- DENV

Adj. R squared = 0.008

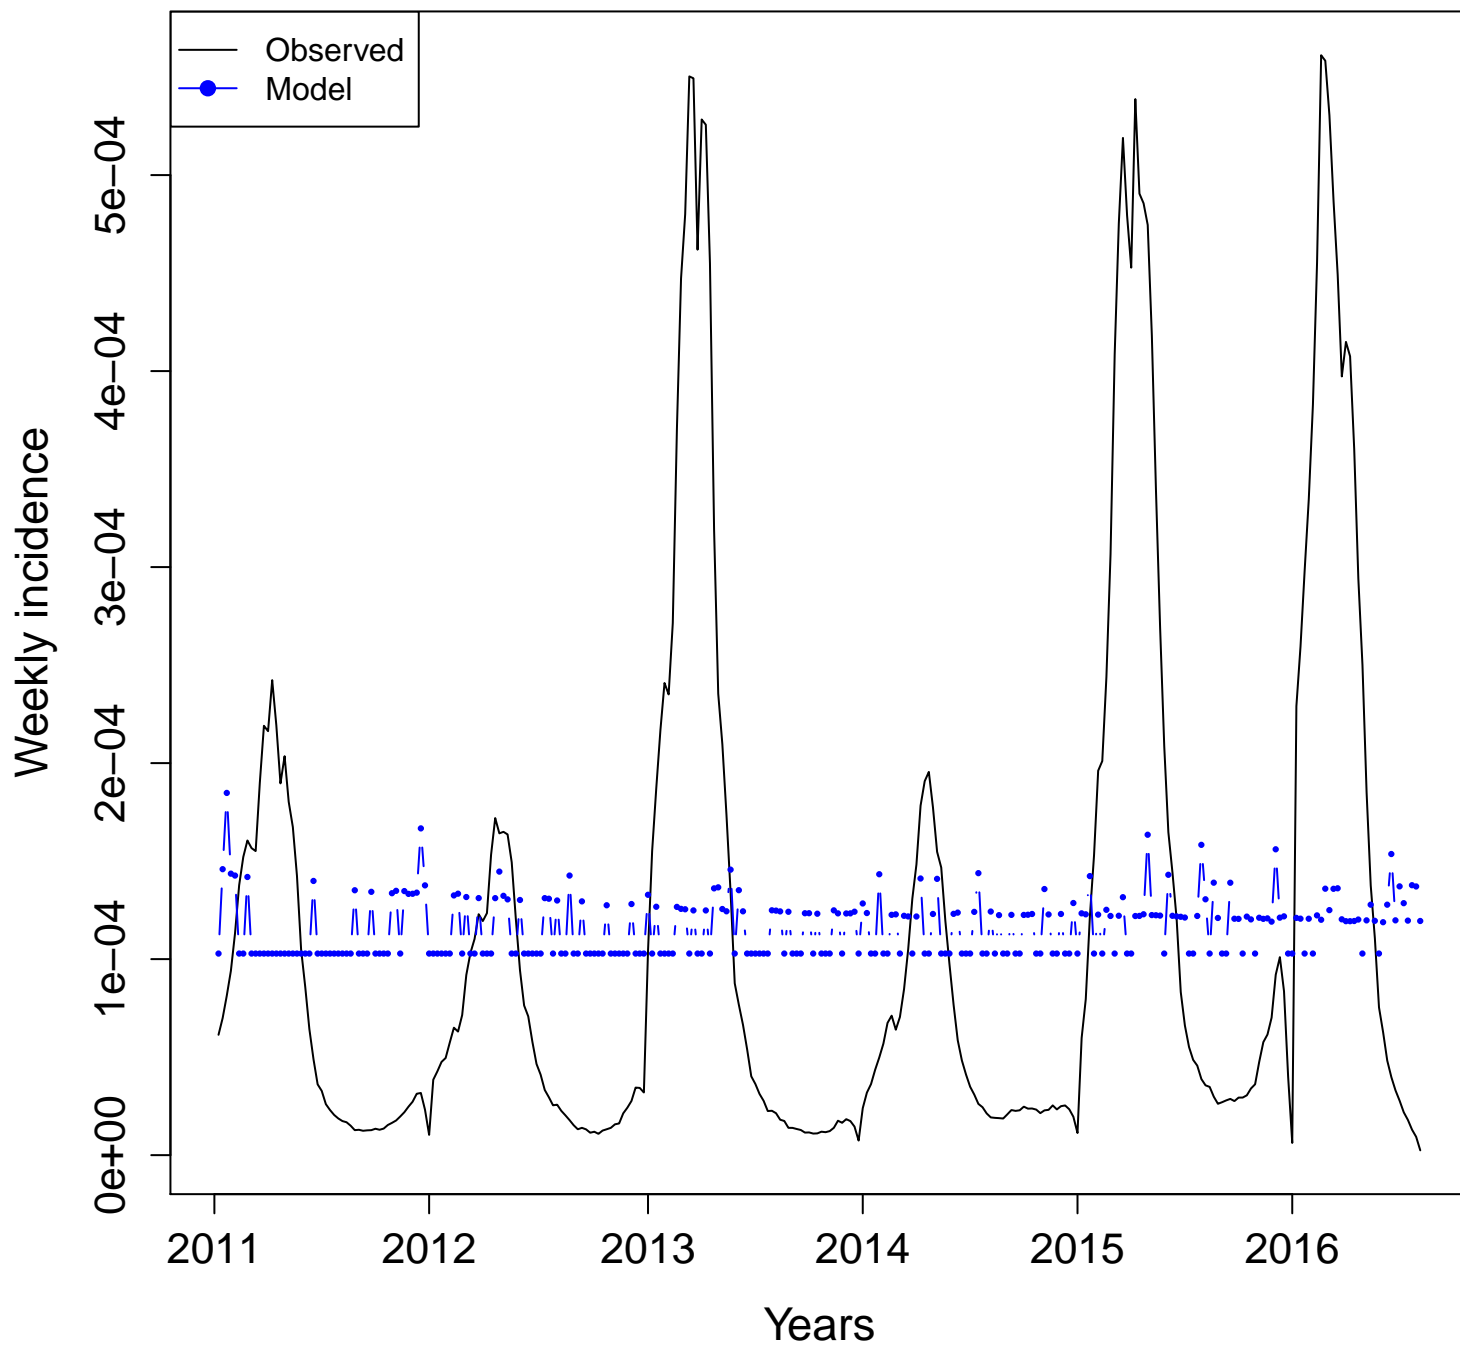



# BR- DHF

Adj. R squared = 0.0026

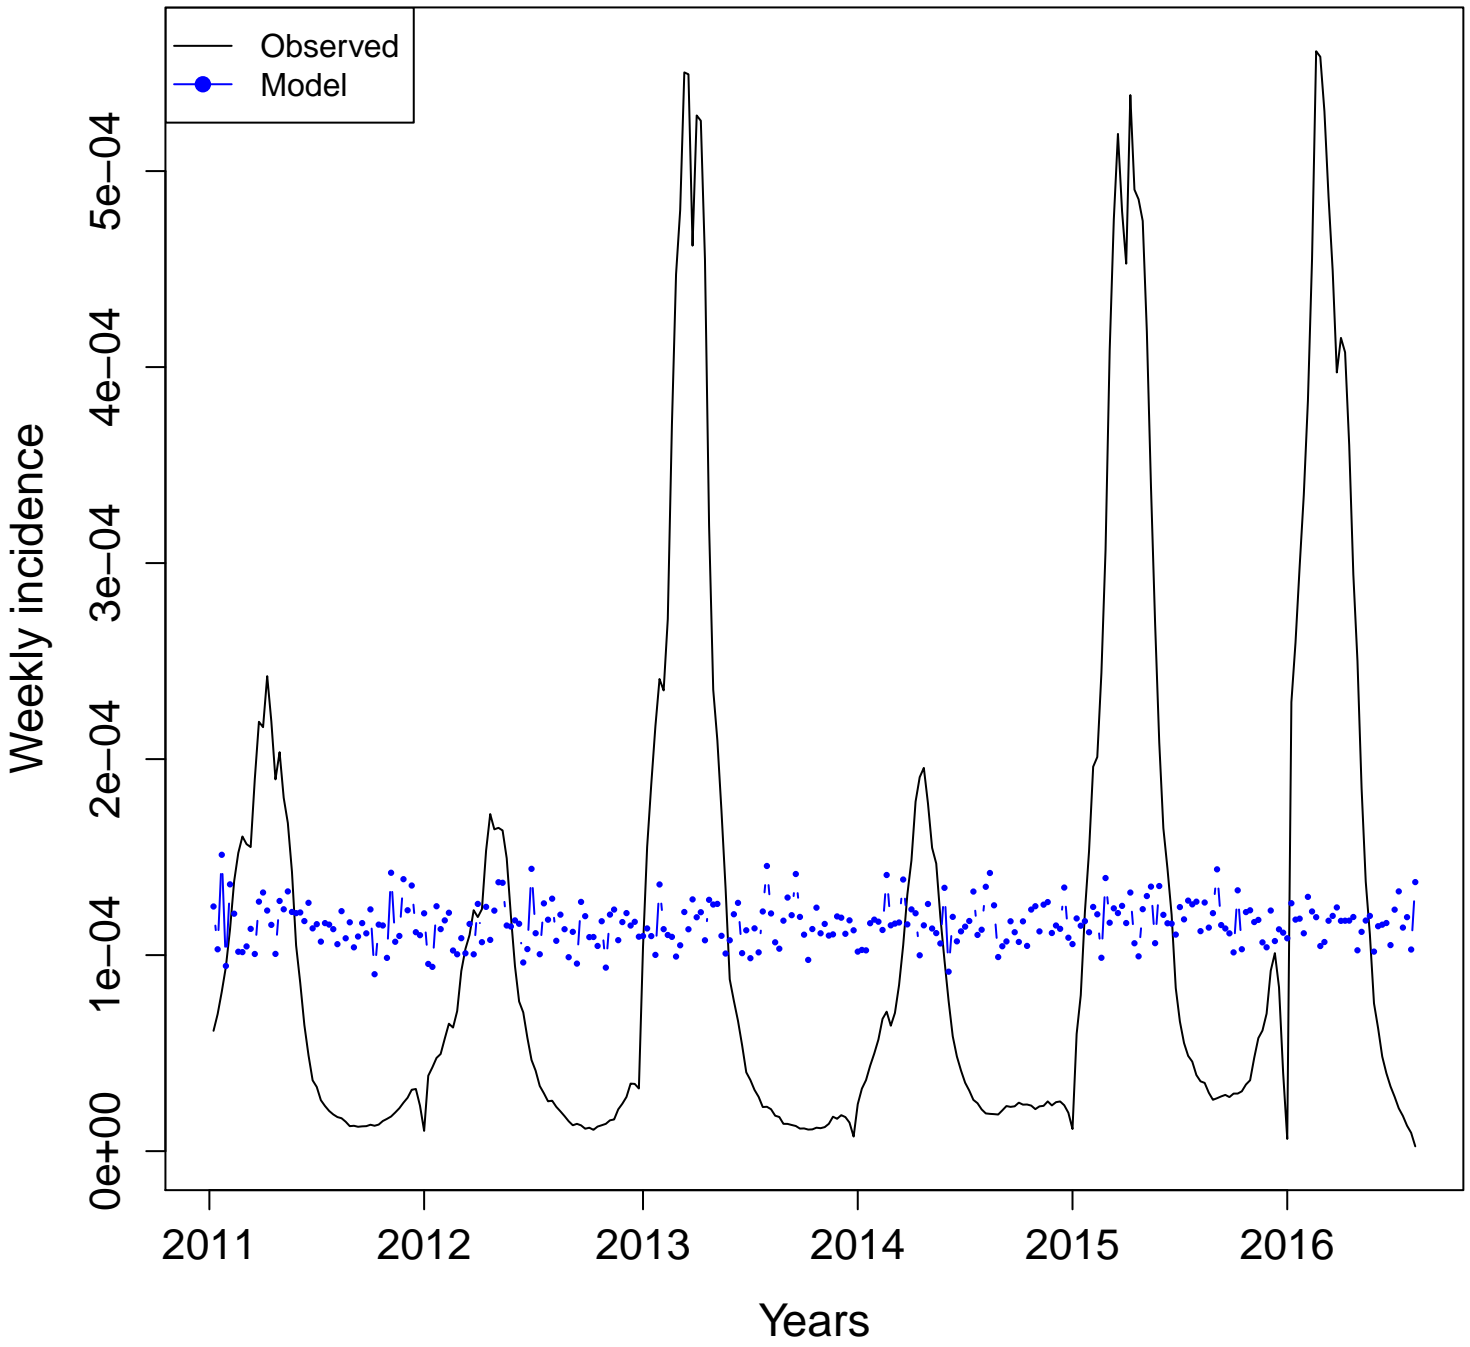

# BR- mosquito

Adj. R squared = 0.4876

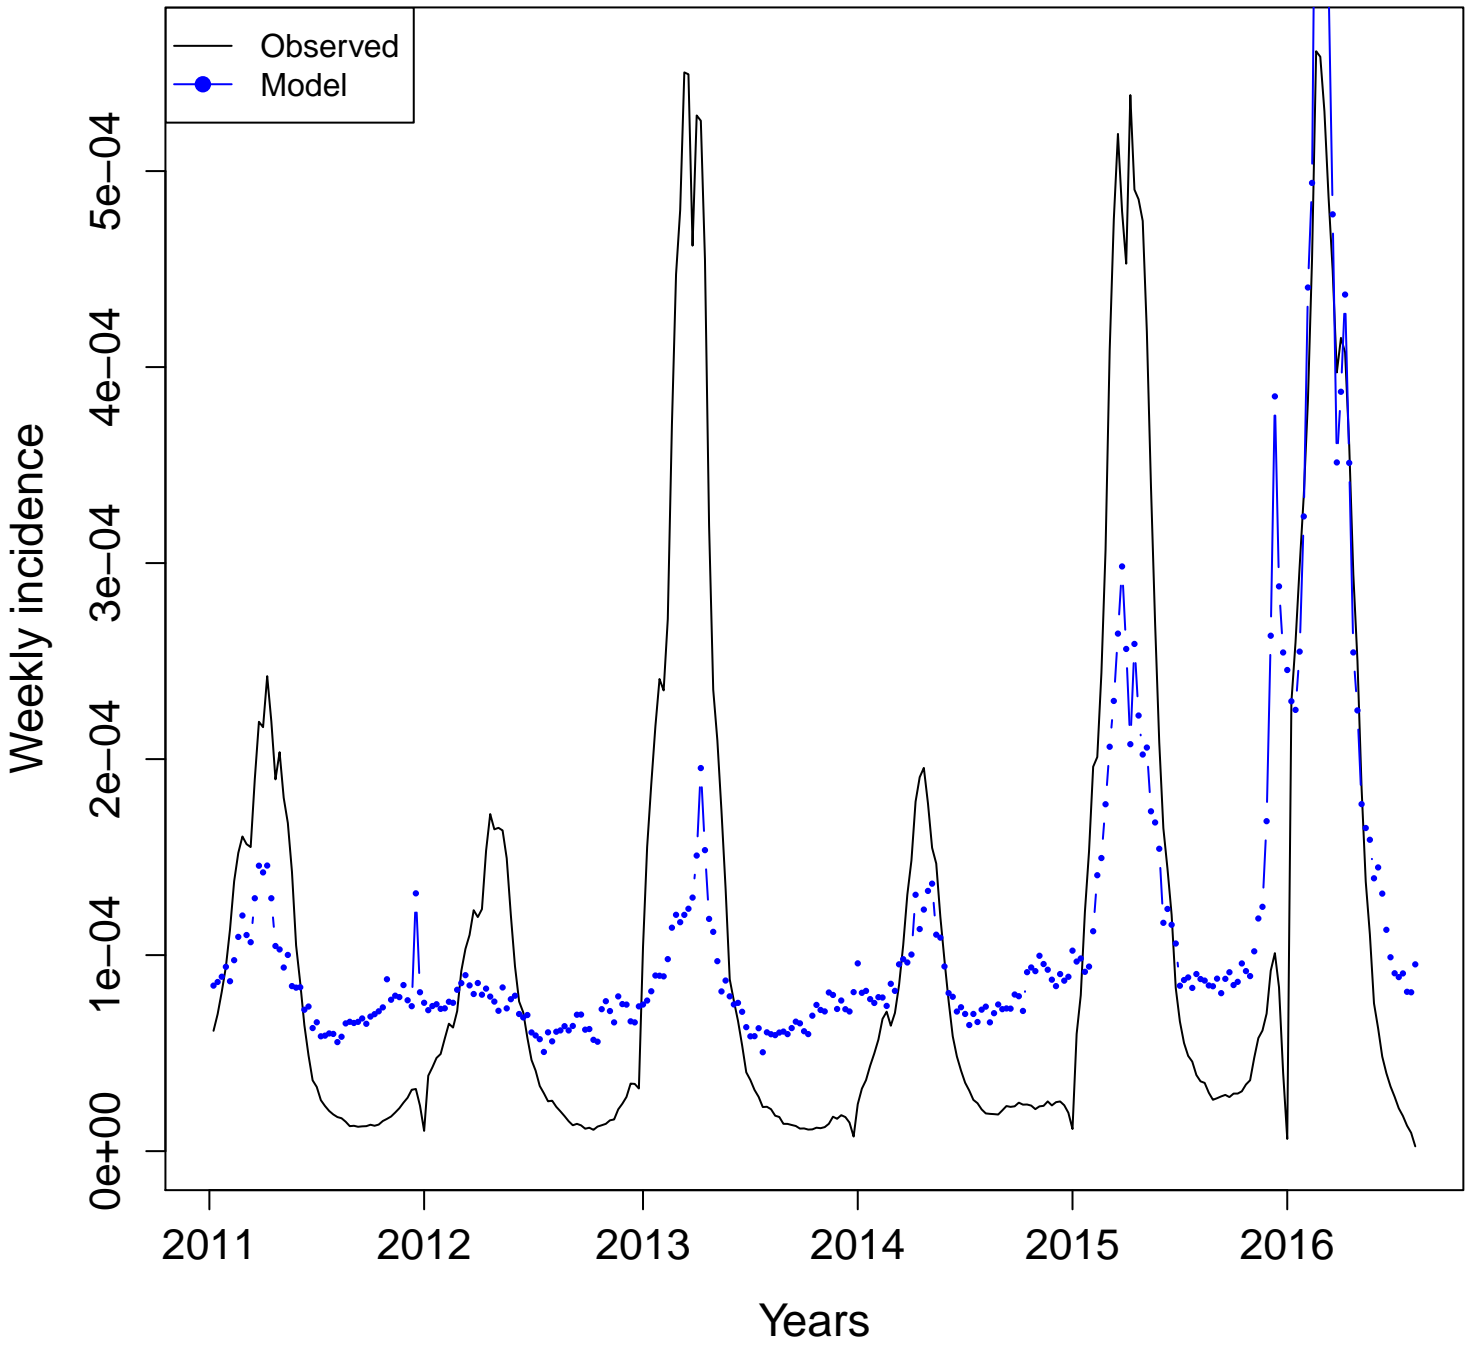

**BR- mosquito.dengue**  
**Adj. R squared = 0.6071**

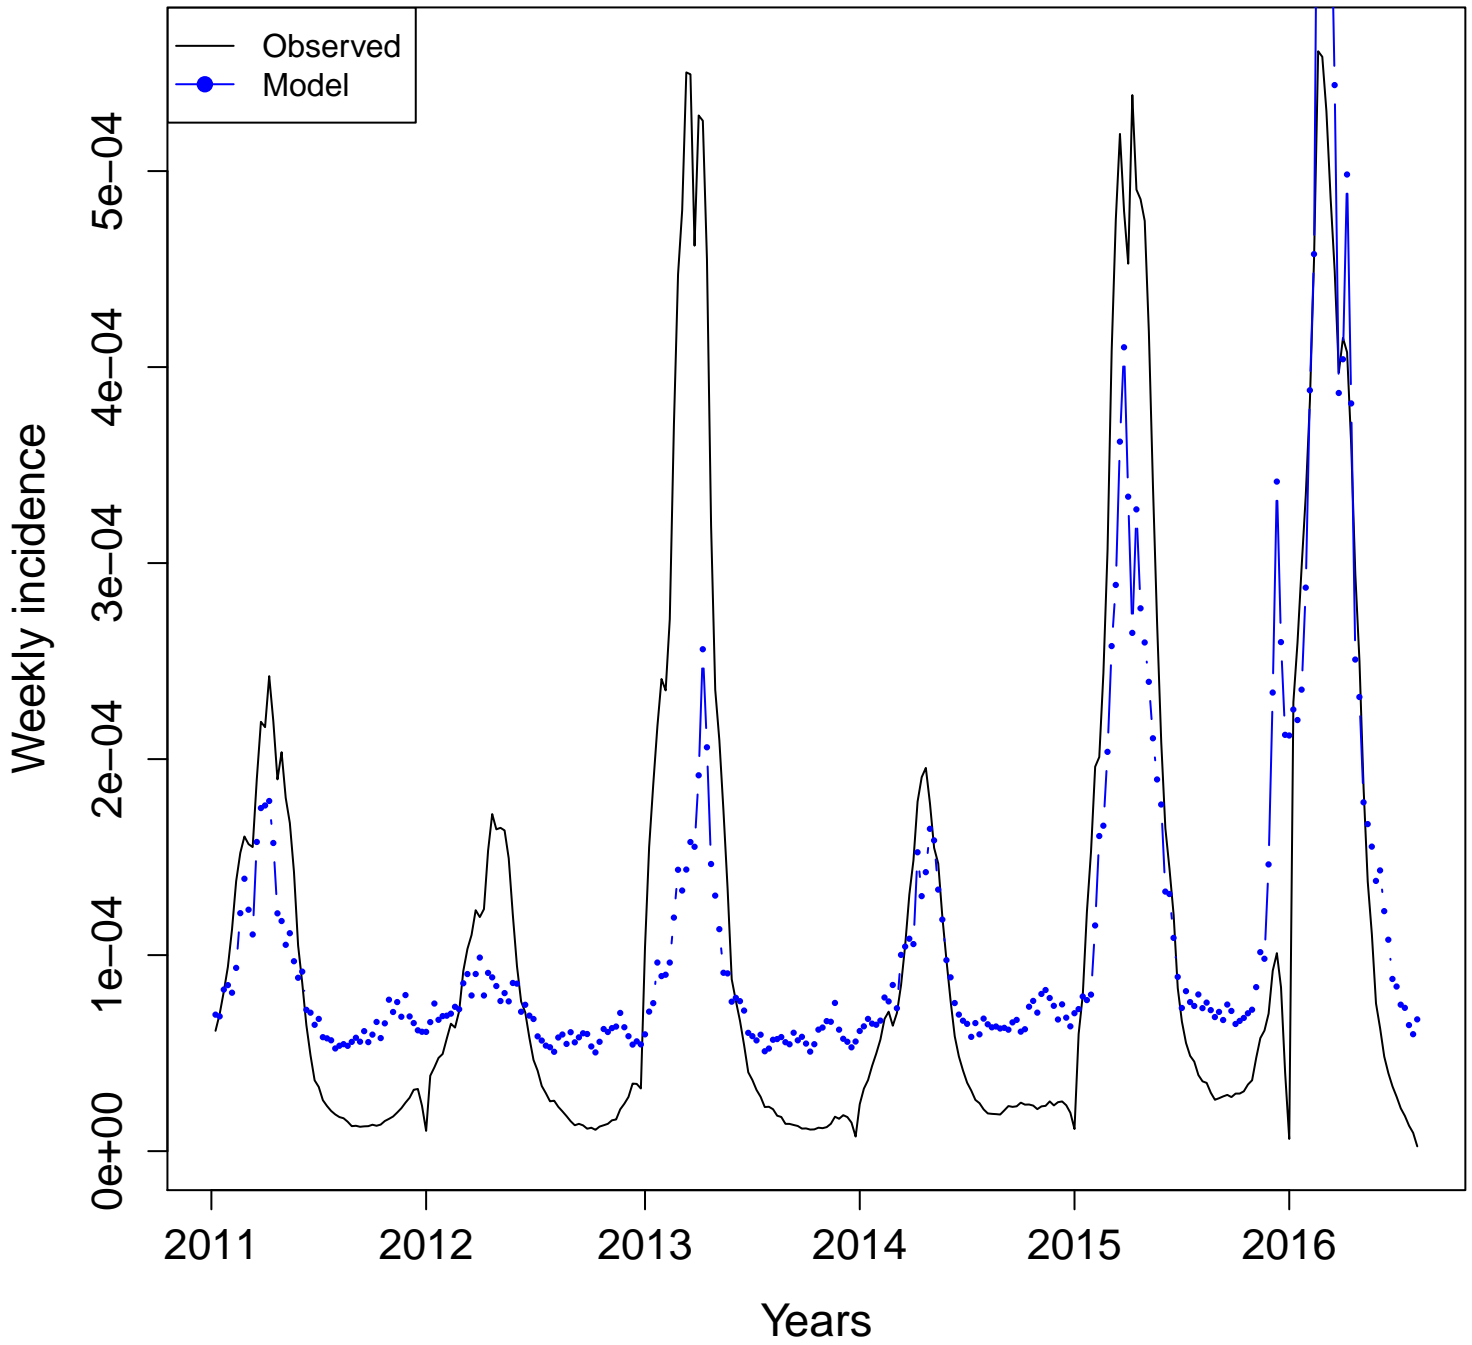

# BR- mosquitoes

Adj. R squared = 0.0592

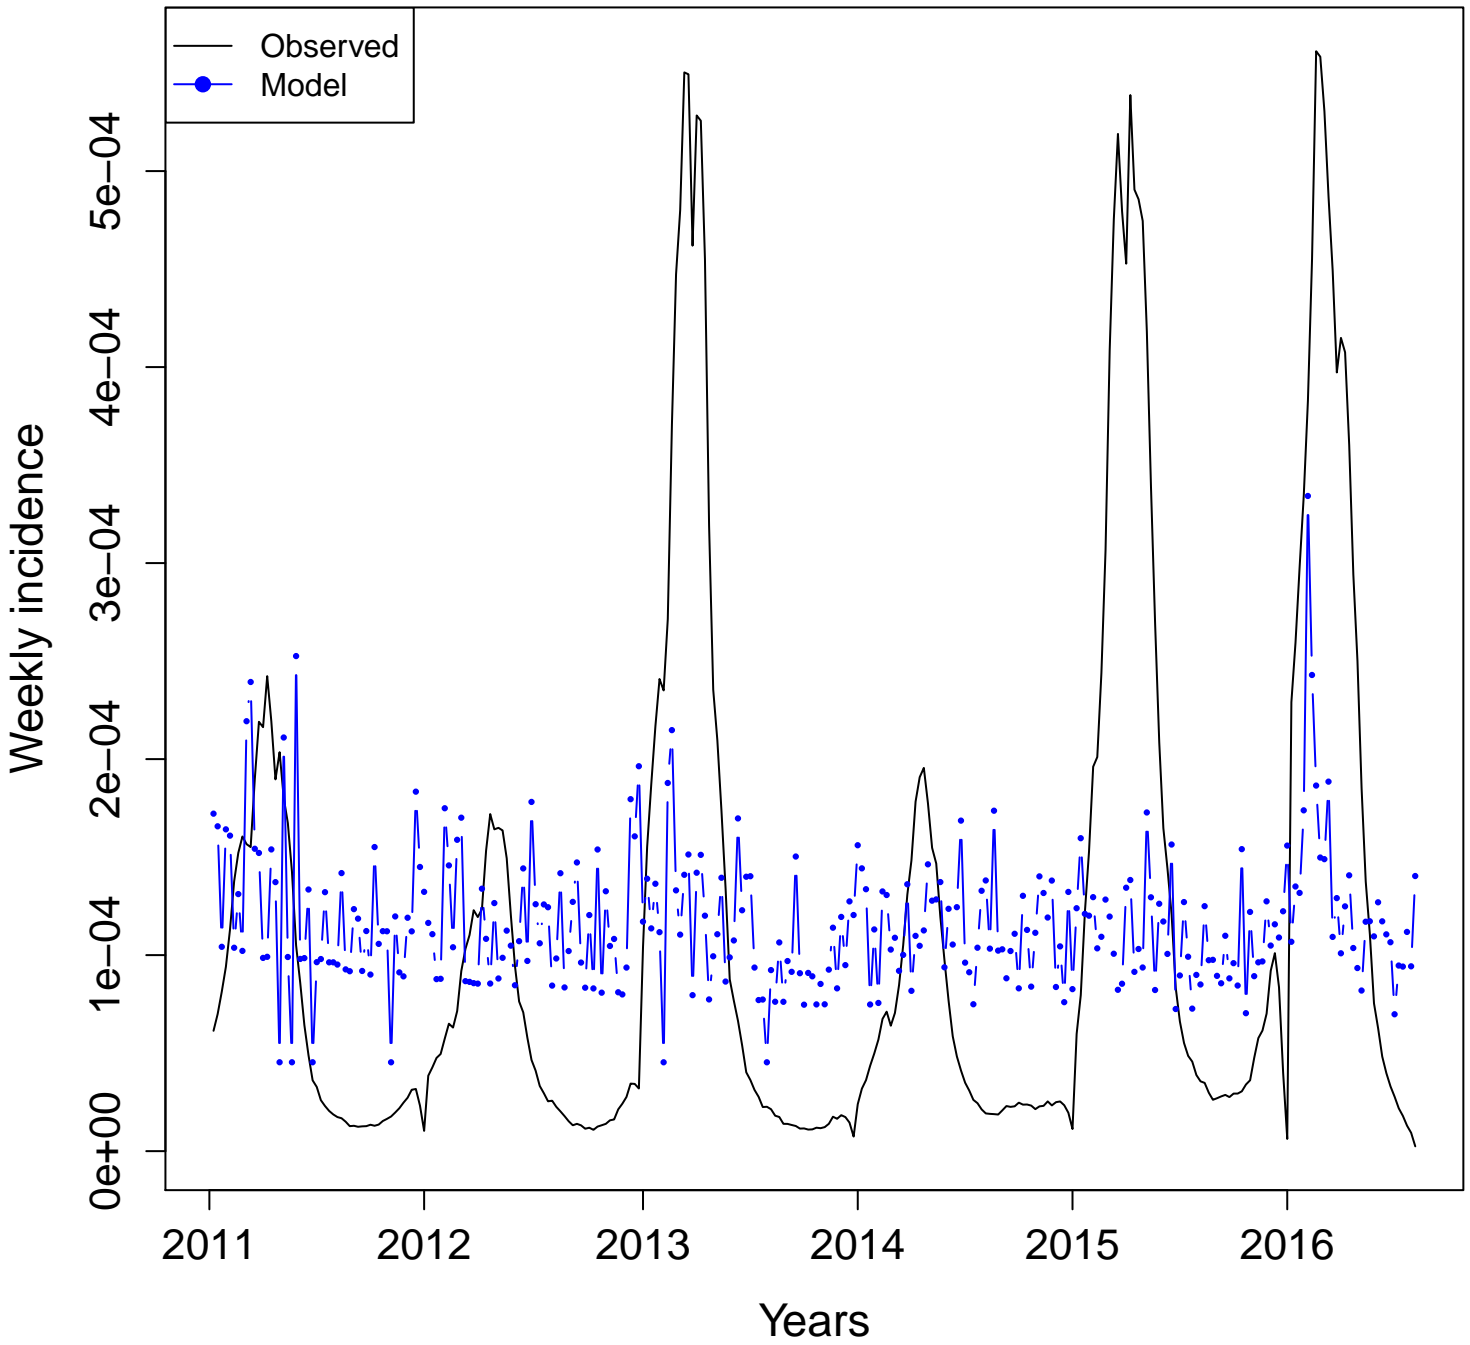

**BR- sintomas.da.dengue**  
**Adj. R squared = 0.8197**

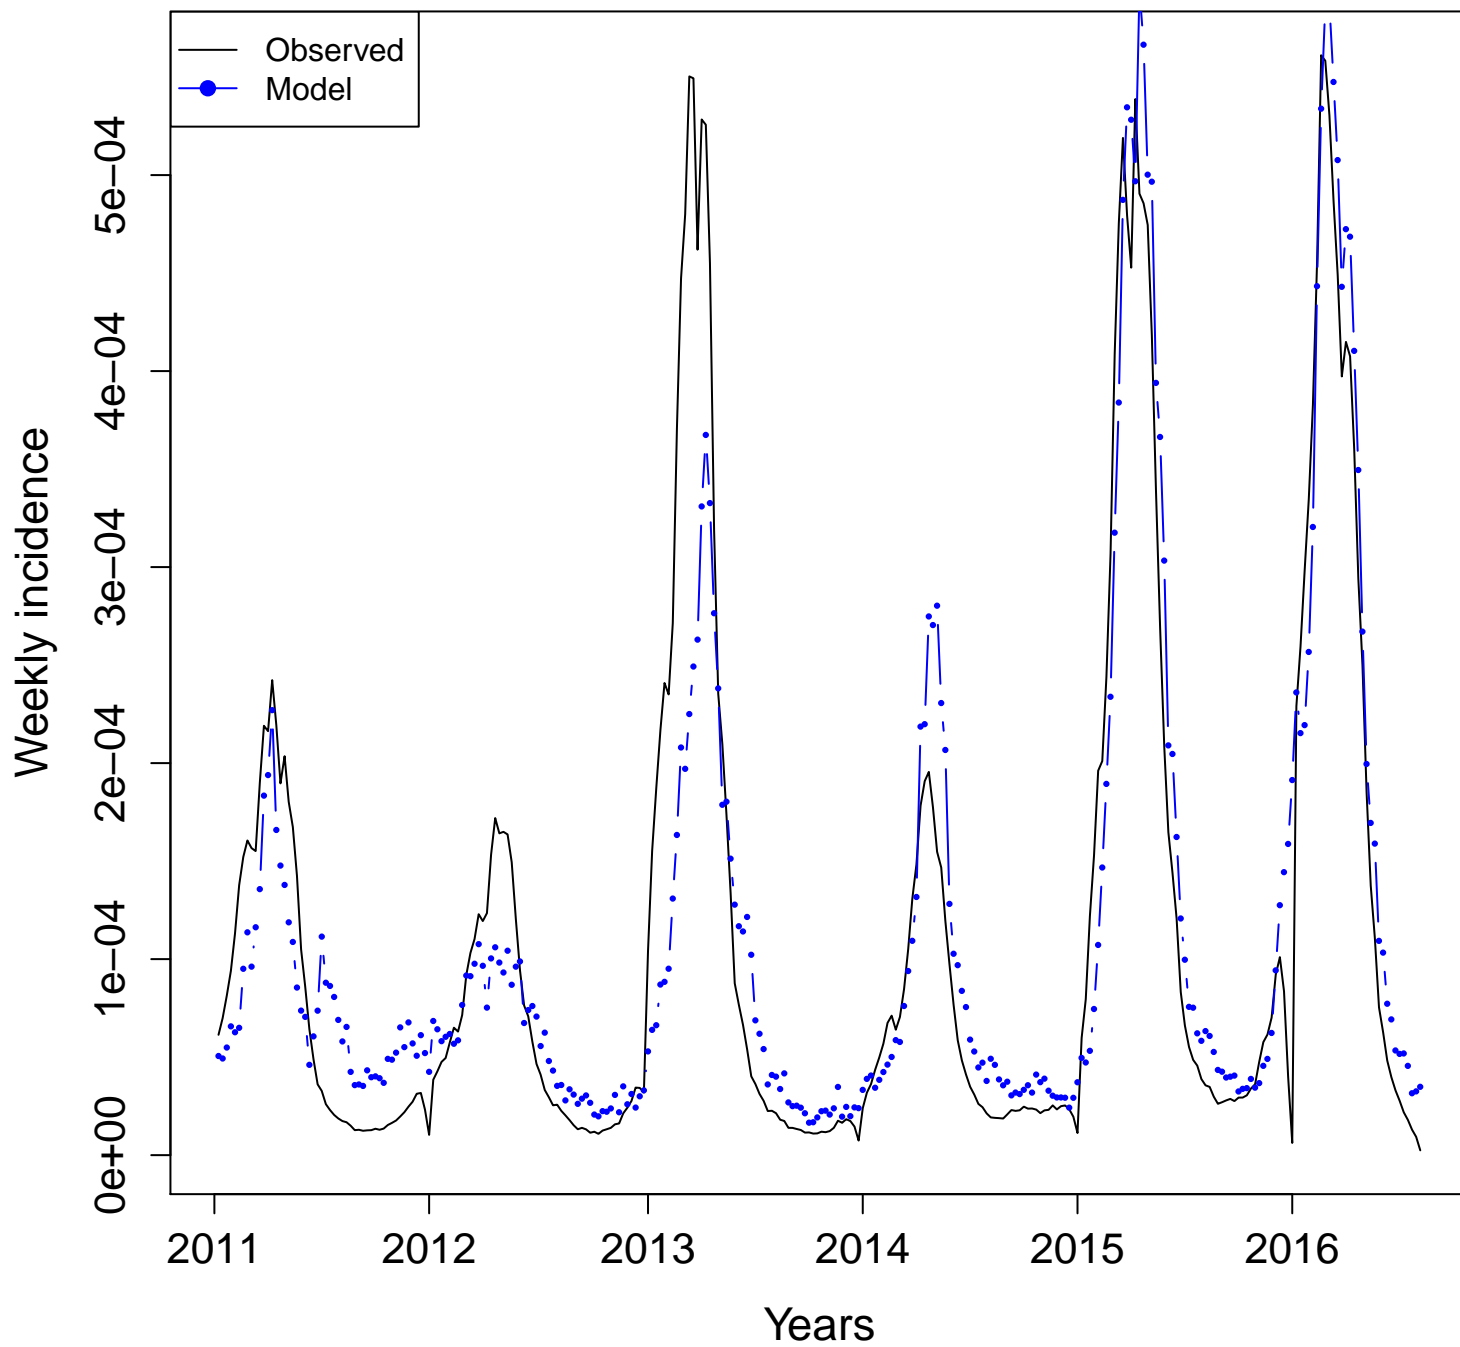

Supplement: 12879_2020_4957_MOESM4_ESM.pdf [file 12879_2020_4957_MOESM4_ESM.pdf]
