# Supplementary material for: Google Health Trends performance reflecting dengue incidence for the Brazilian states
Source: Springer Nature journal article supplement (doi:10.1186/s12879-020-04957-0), 2020-03-26

# Google Health Trends performance reflecting dengue incidence for the Brazilian states

Daniel Romero-Alvarez, Nidhi Parikh, Dave Osthus, Kaitlyn Martinez, Nicholas Generous, Sara del Valle, Carrie A. Manore

**Additional file:** Plots of multiple and simple linear models between Google Health Trends data and weekly dengue incidence for each of the 27 Brazilian states

# Combined and individual terms for all the Brazilian states

## Index

- [Acré \(AC\)](#)
- [Alagoas \(AL\)](#)
- [Amapá \(AP\)](#)
- [Amazonas \(AM\)](#)
- [Bahia \(BA\)](#)
- [Ceará \(CE\)](#)
- [Distrito Federal \(DF\)](#)
- [Espírito Santo \(ES\)](#)
- [Goiás \(GO\)](#)
- [Maranhão \(MA\)](#)
- [Mato Grosso \(MT\)](#)
- [Mato Grosso do Sul \(MS\)](#)
- [Minas Gerais \(MG\)](#)
- [Pará \(PA\)](#)
- [Paraíba \(PB\)](#)
- [Paraná \(PR\)](#)
- [Pernambuco \(PE\)](#)
- [Piauí \(PI\)](#)
- [Rio de Janeiro \(RJ\)](#)
- [Rio Grande do Norte \(RN\)](#)
- [Rondônia \(RO\)](#)
- [Roraima \(RR\)](#)
- [Santa Catarina \(SC\)](#)
- [São Paulo \(SP\)](#)
- [Sergipe \(SE\)](#)
- [Tocantins \(TO\)](#)

## Acré (AC)

# Dengue incidence vs. Google Health Trends (2011–2016)

### Definitions:

- **Combined terms:**
  - **All:** model with all the available terms.  $n$  = number of terms
  - **Four:** model with "dengue", "dengue sintomas", "aedes", and "mosquito".
  - **Uncorrelated:** model with non-correlated terms.  $n$  = number of uncorrelated terms
- **Individual terms:** Plots developed with one term at a time.
- Terms for all and uncorrelated models can be found in additional file 3.

**Combined terms**  
**Adjusted R squared**

**Acré (AC)**

All  
(n = 7)

BR-AC  
Adj. R squared = 0.1264

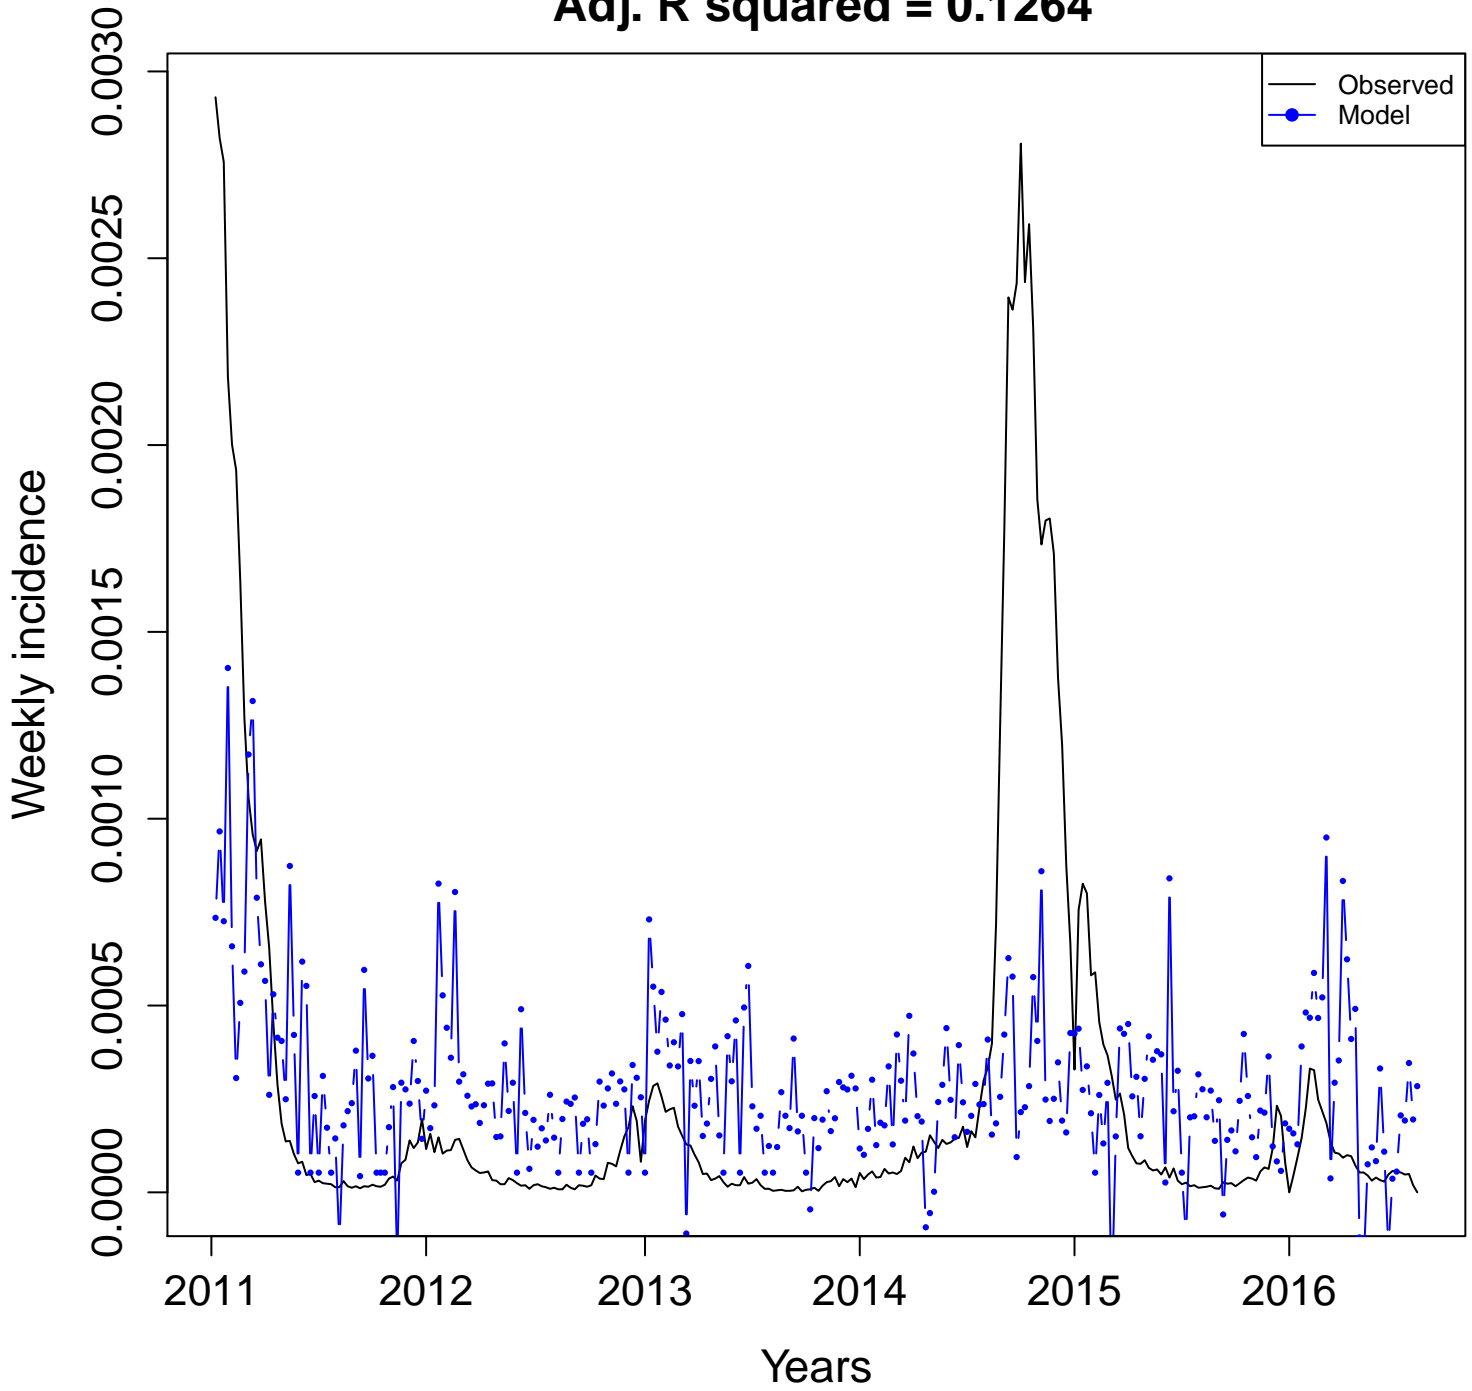

**BR-AC**  
**Adj. R squared = 0.0916**

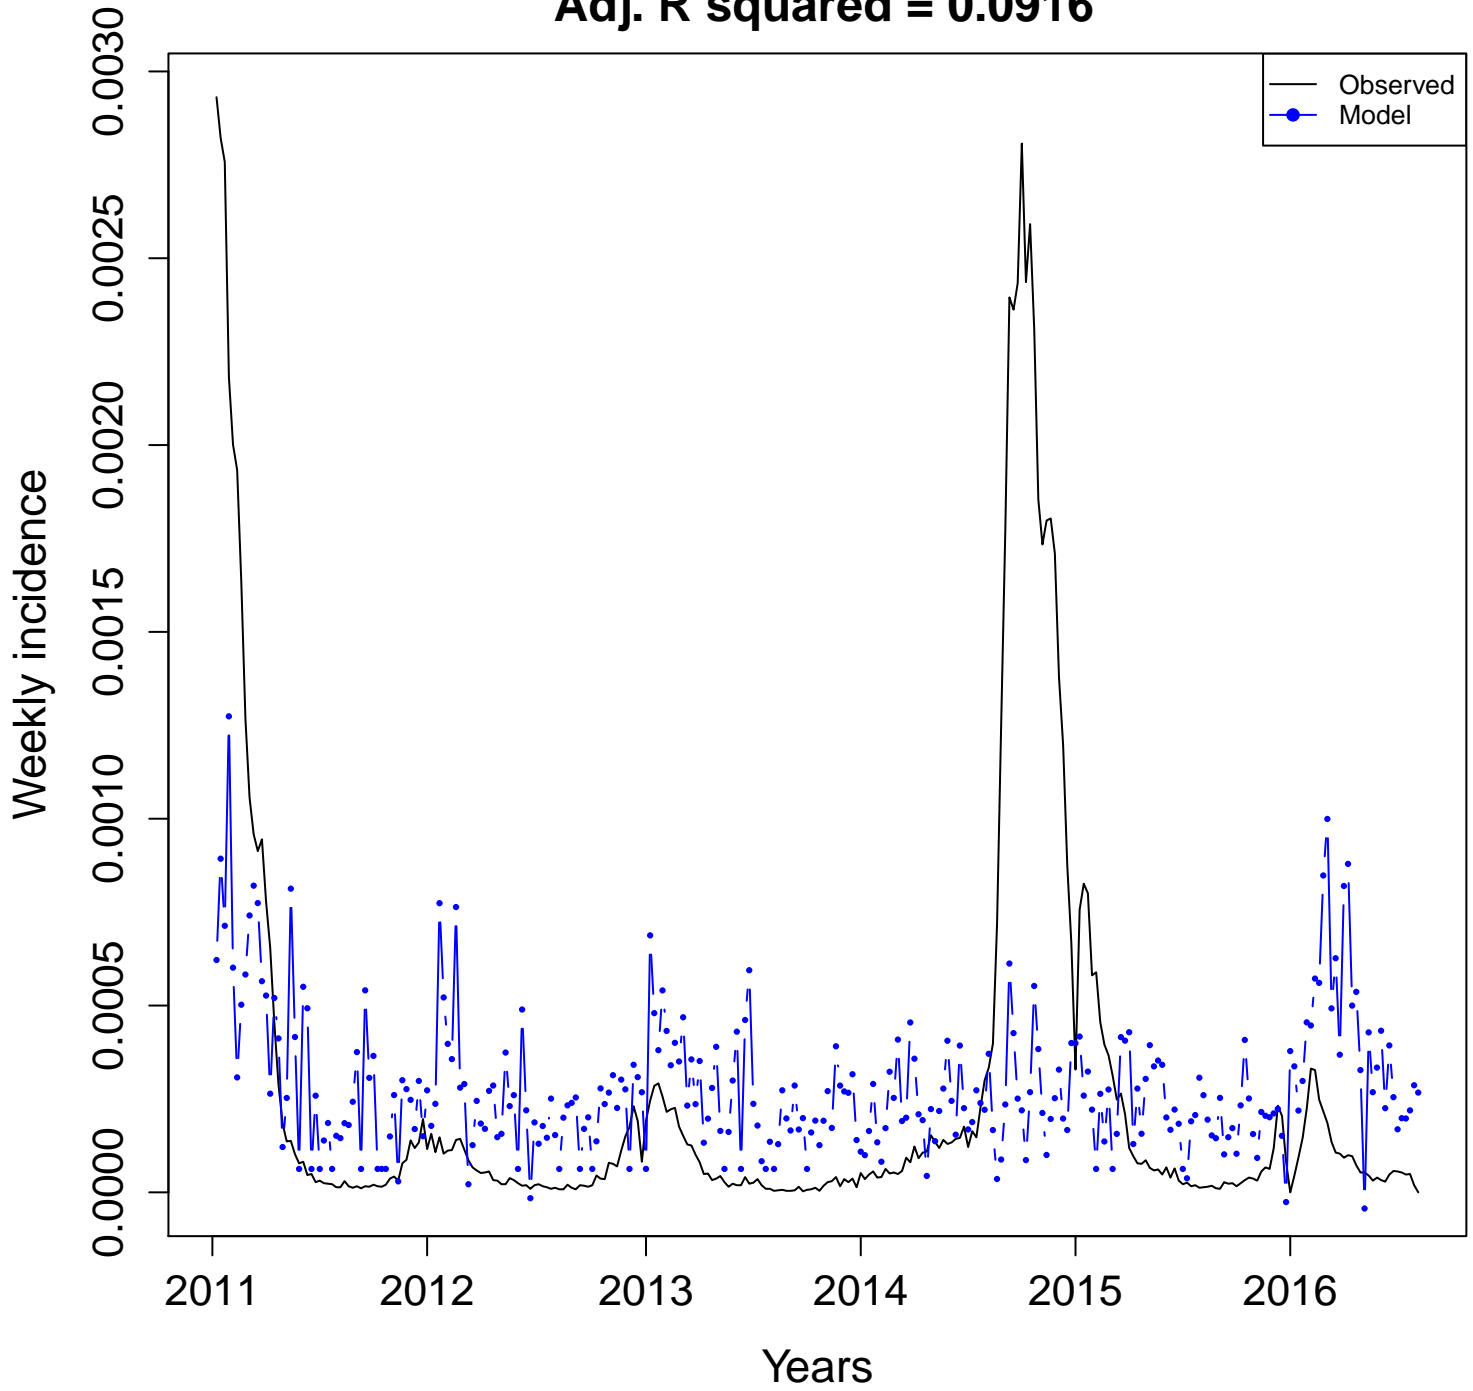

**Uncorrelated  
(n = 6)**

**BR-AC  
Adj. R squared = 0.1098**

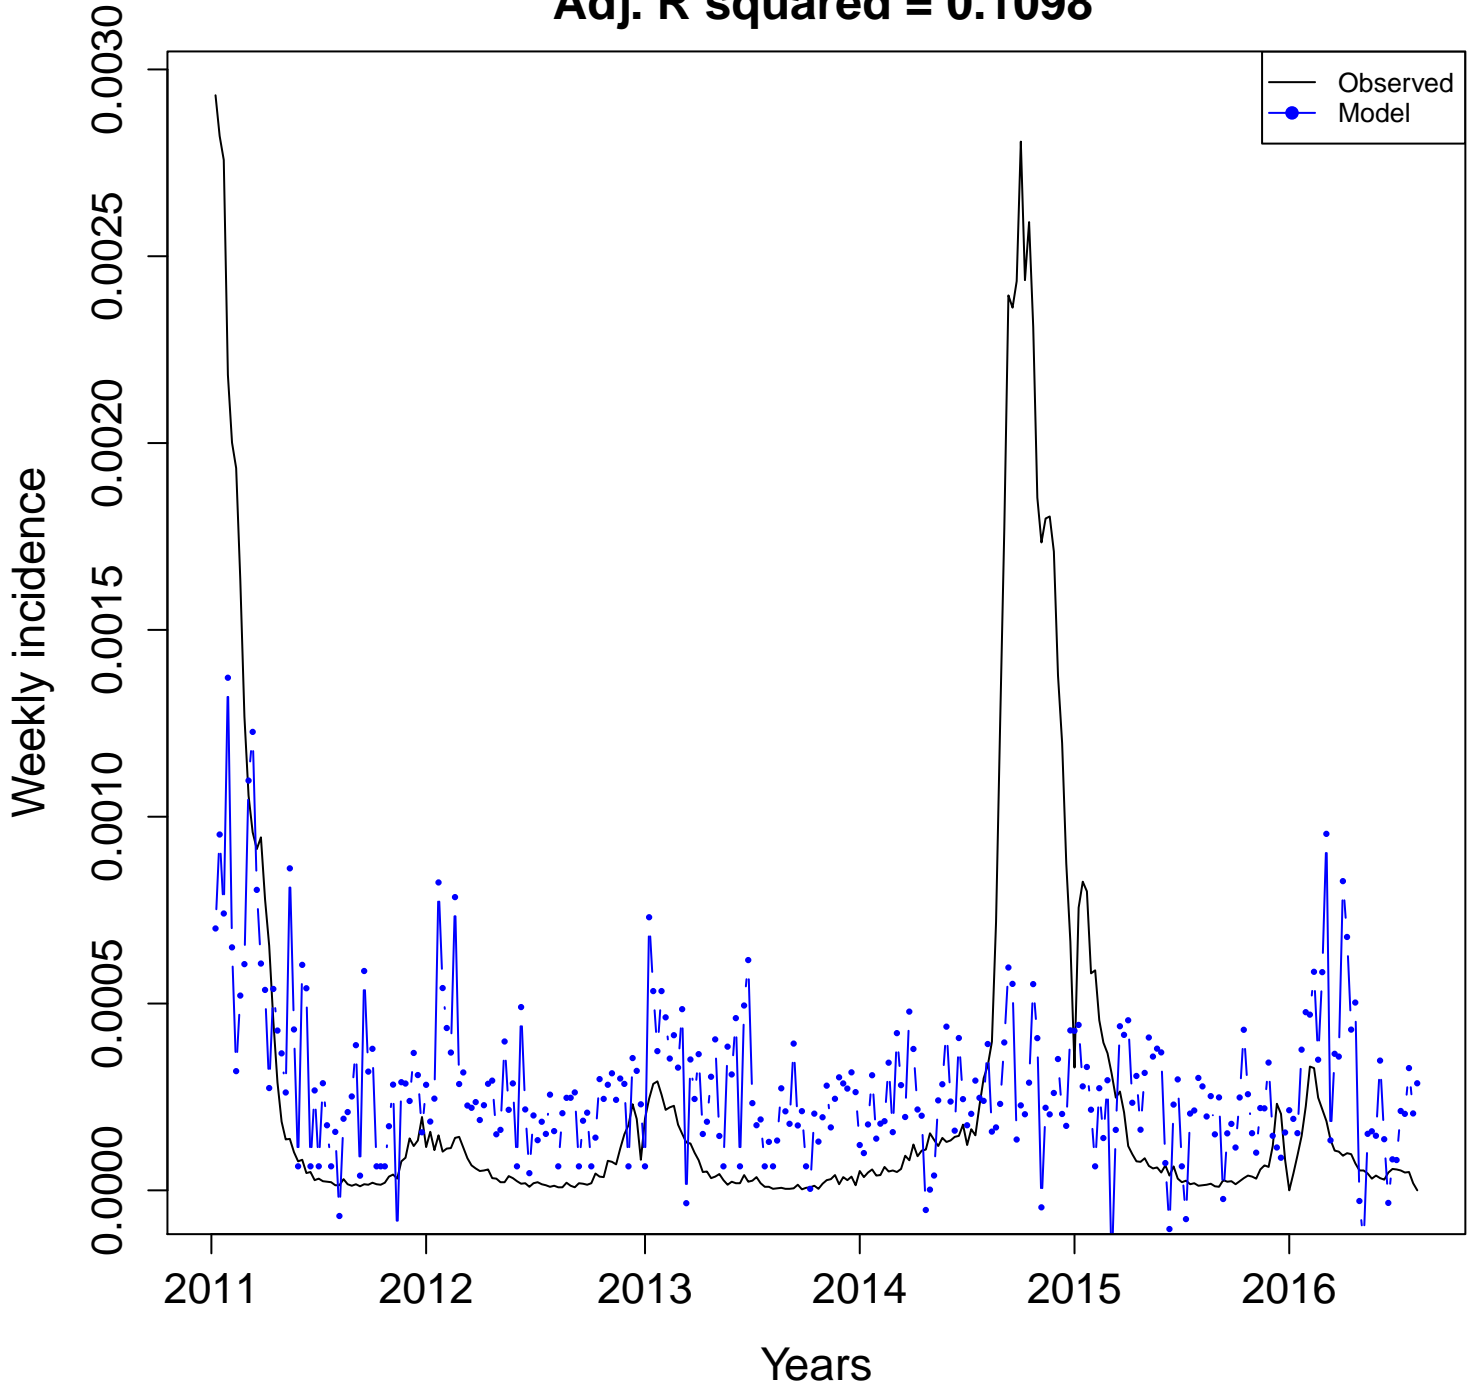

**Individual terms**  
**Adjusted R squared**

**Acré (AC)**



**AC- aedes.aegypti**  
**Adj. R squared = 0.0025**

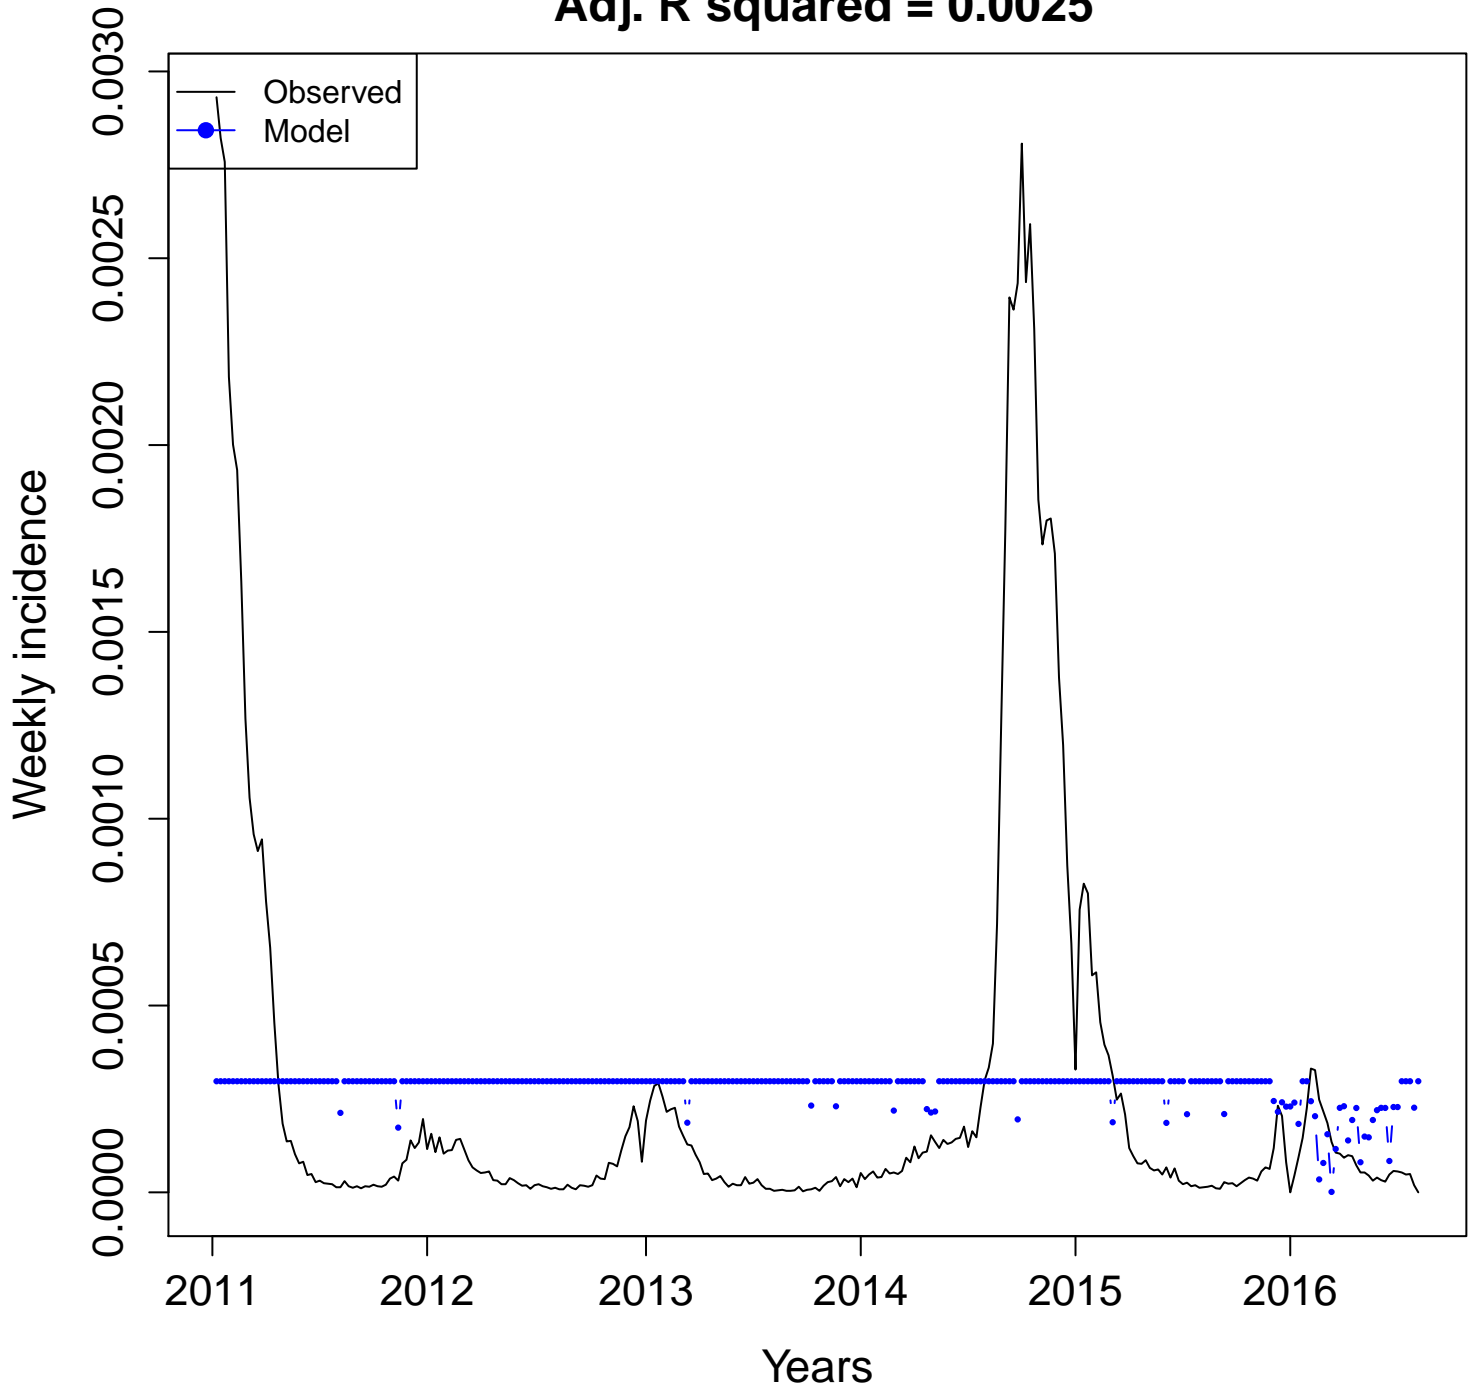

**AC- aedes**  
**Adj. R squared = -0.0016**

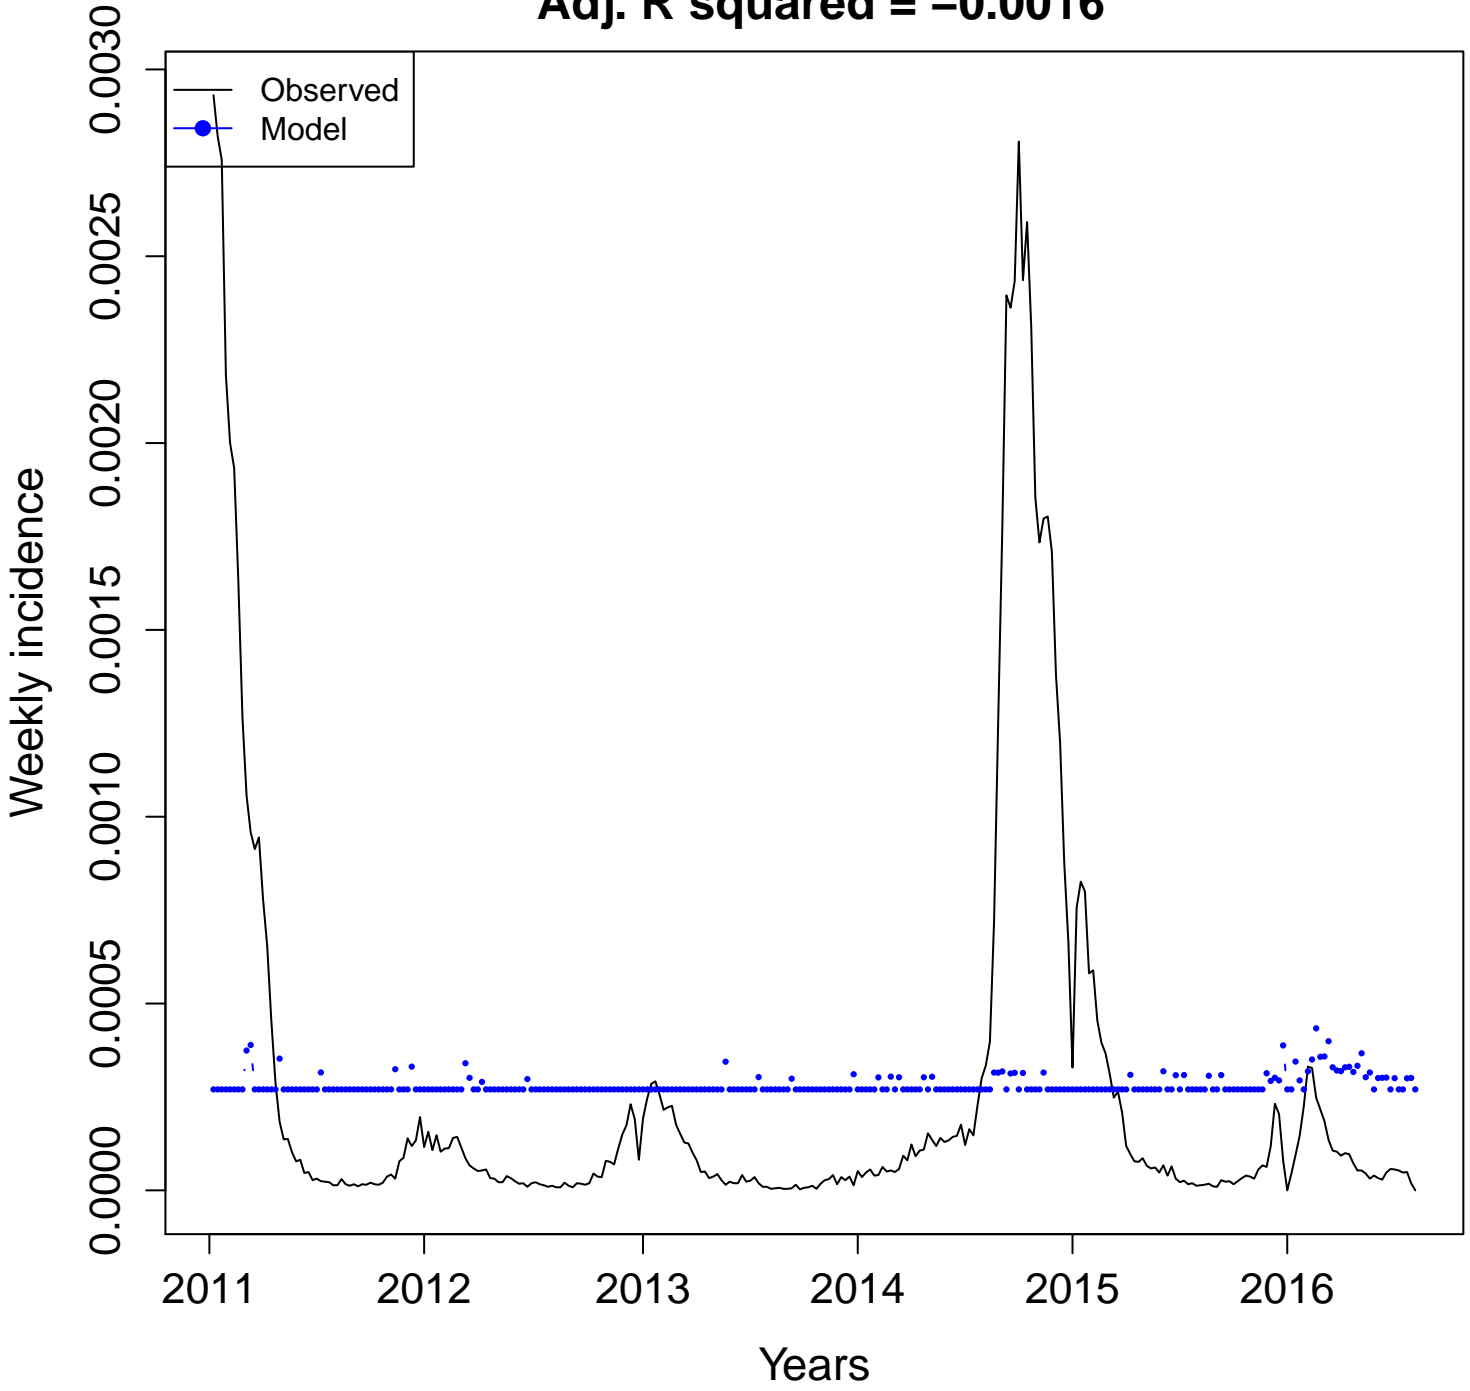

**AC- aegypti**  
**Adj. R squared = 1e-04**

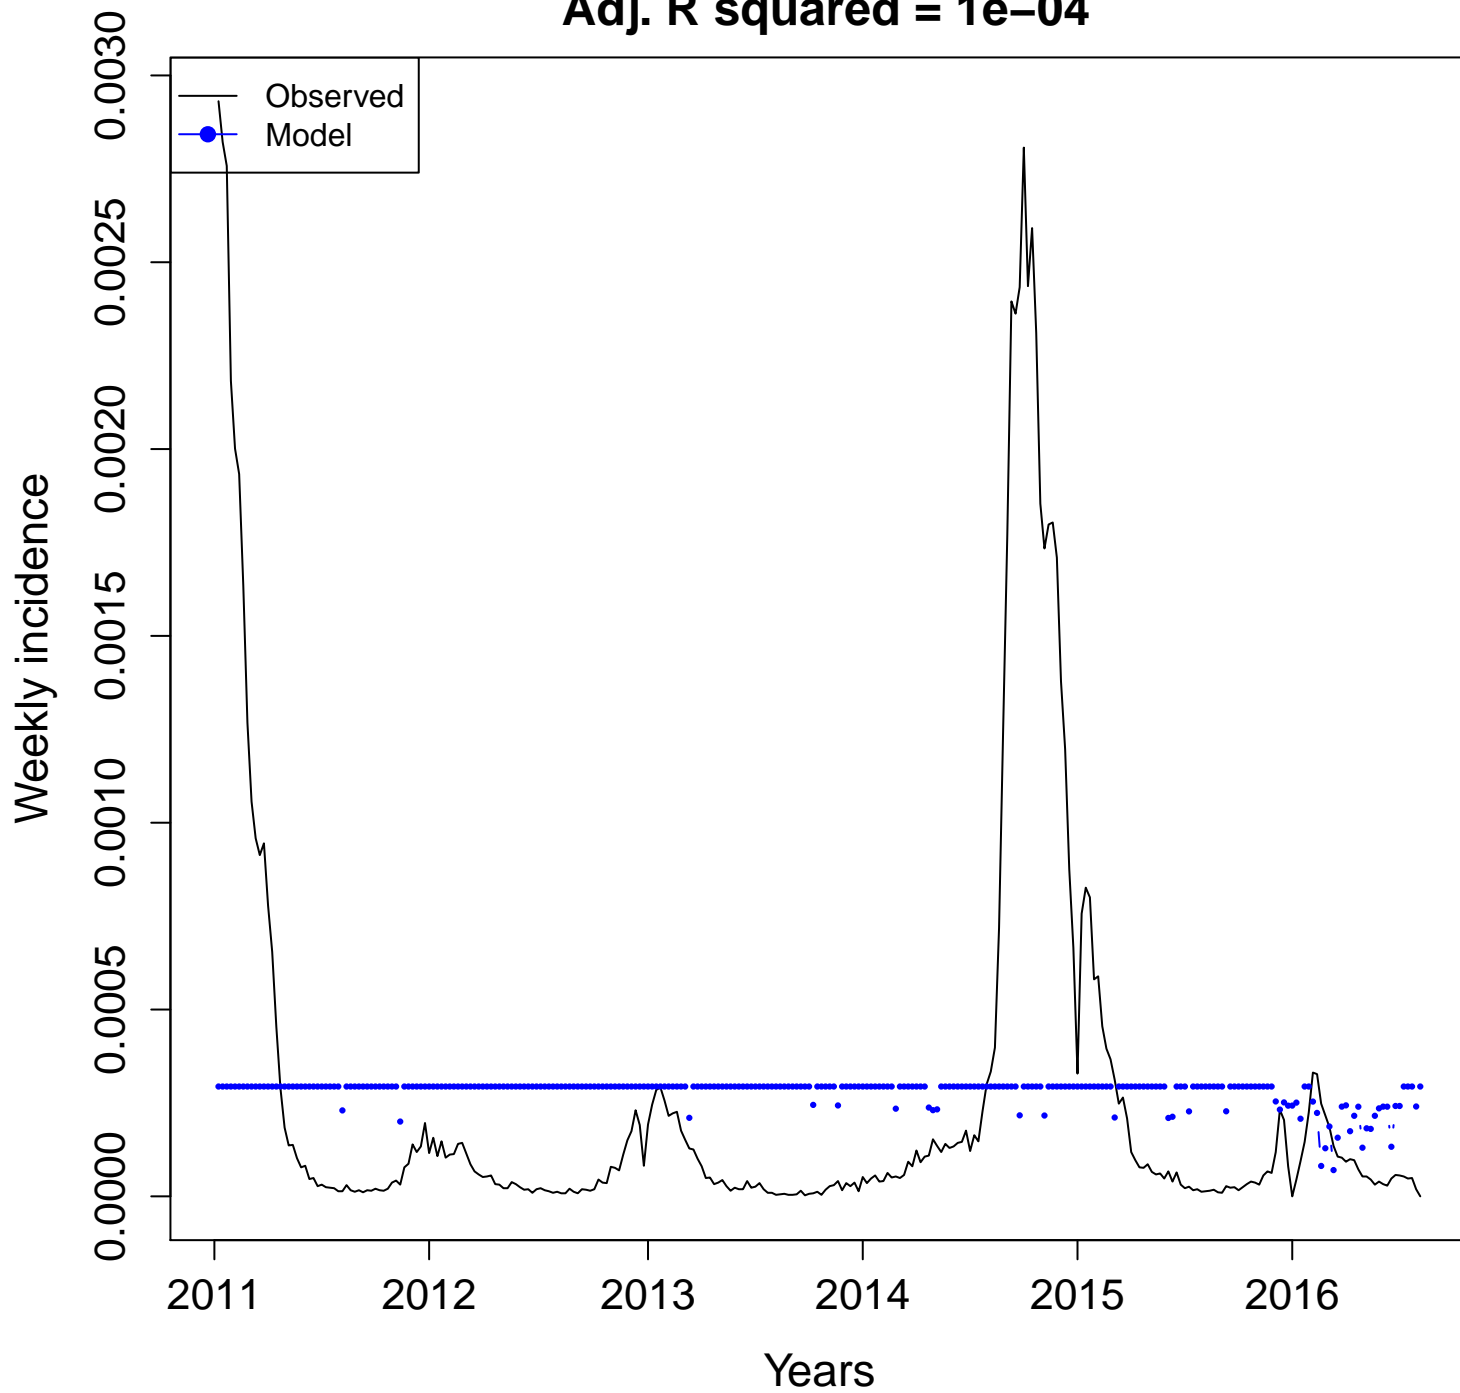

# AC- dengue

Adj. R squared = 0.0815

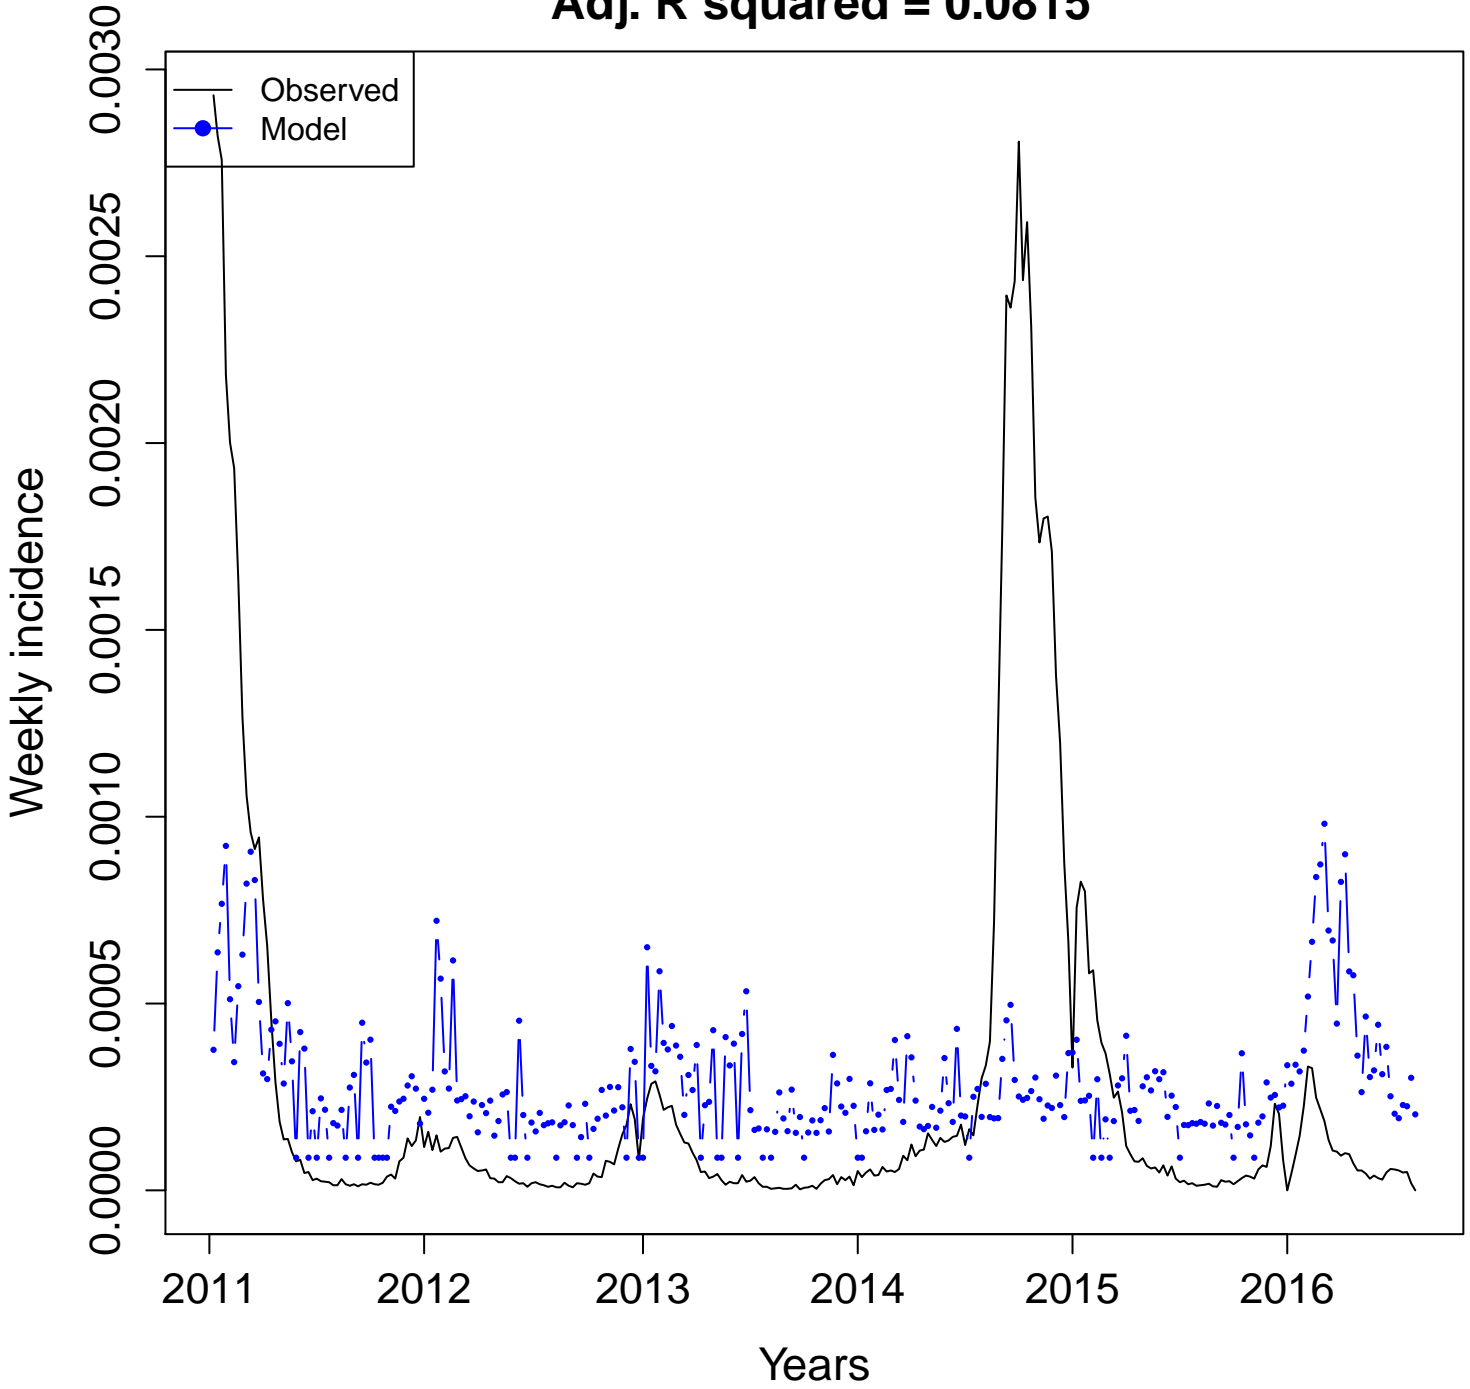

**AC- dengue.sintomas**  
**Adj. R squared = 0.0227**

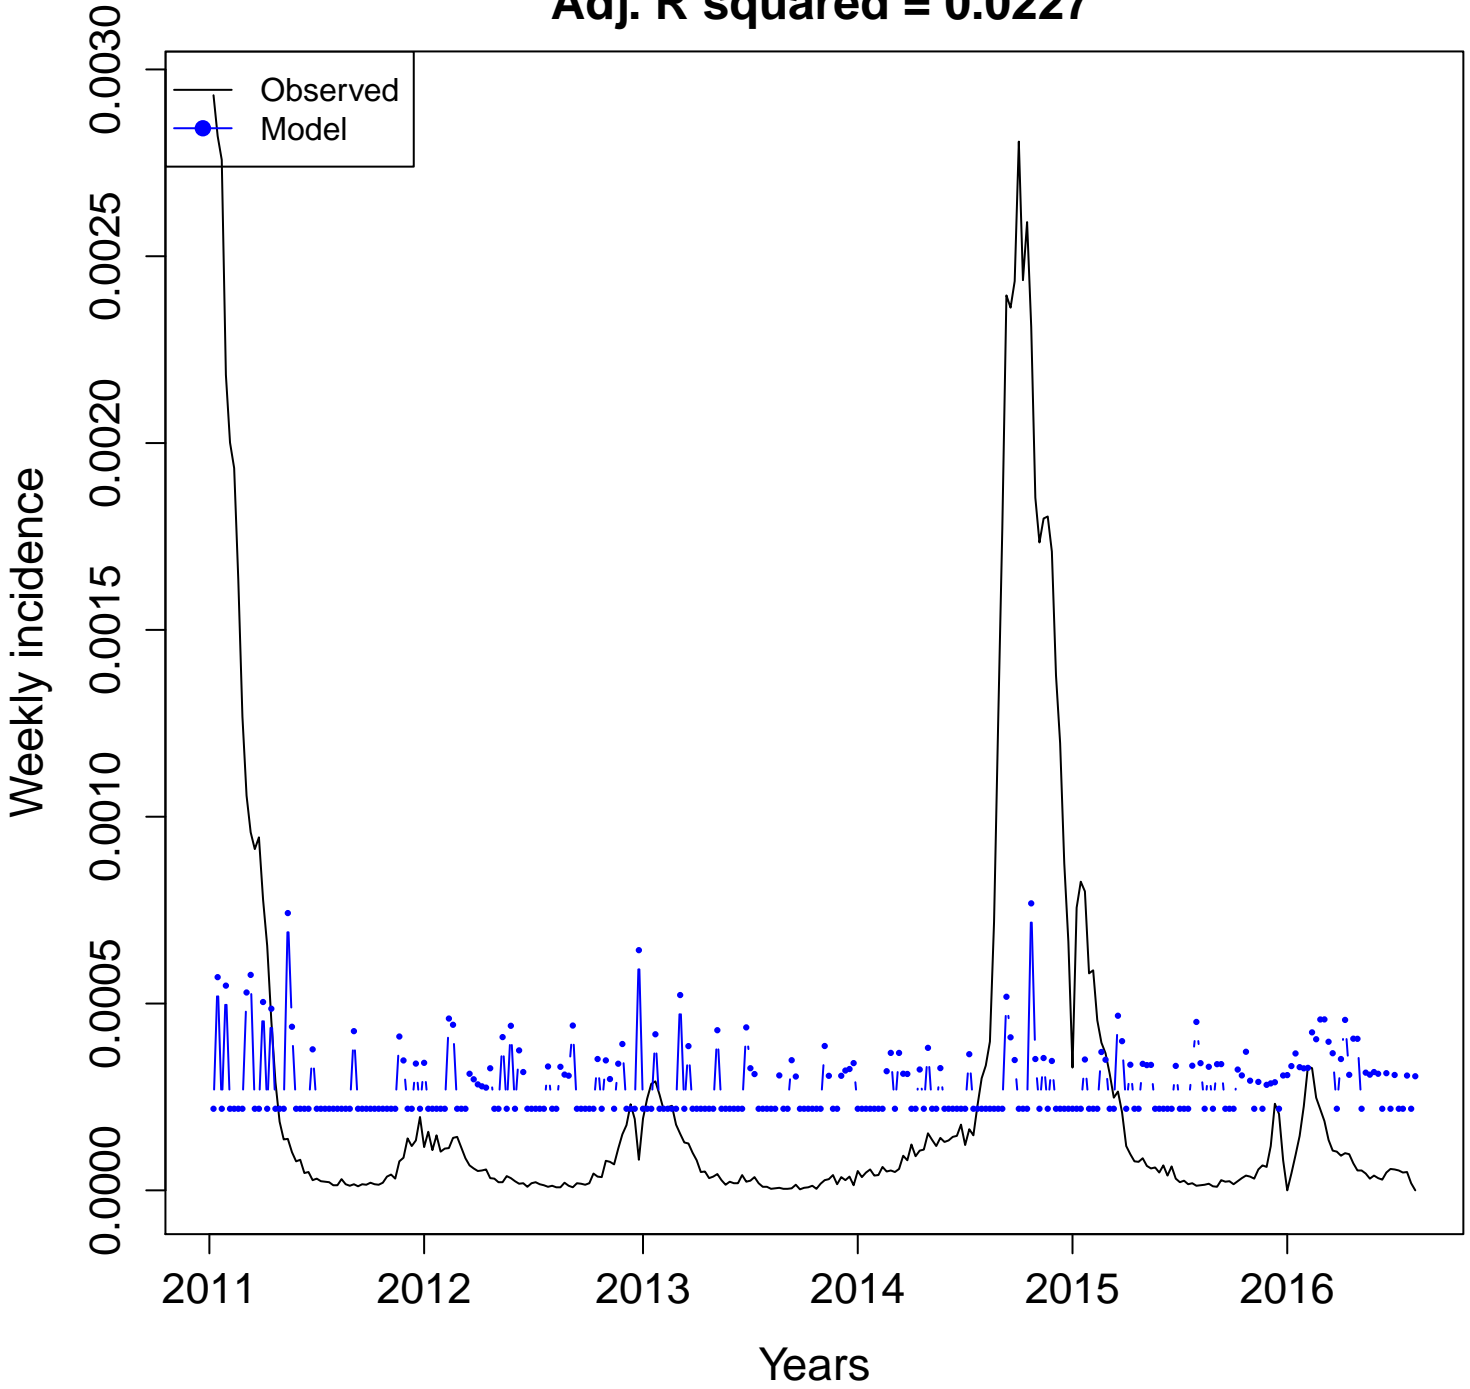

# AC- mosquito

Adj. R squared = 0.0374

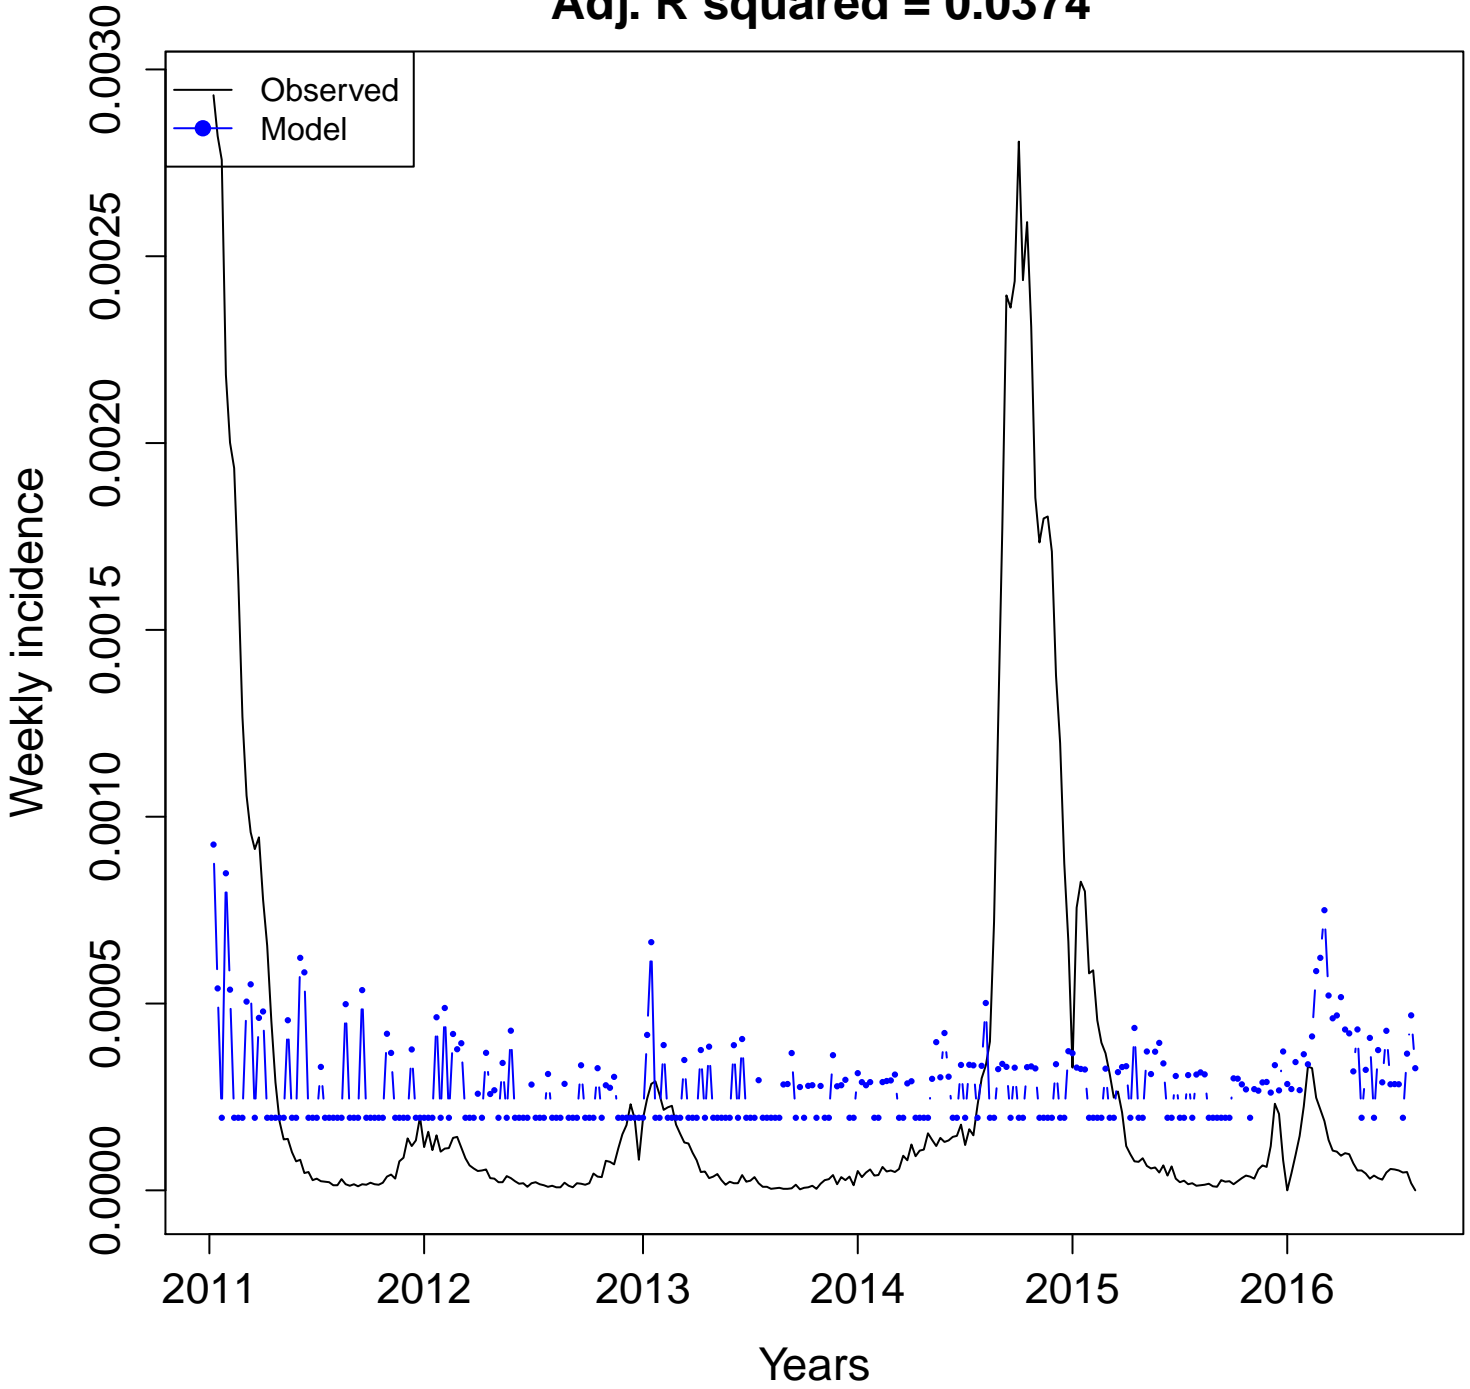

**AC- sintomas.da.dengue**  
**Adj. R squared = -0.0019**

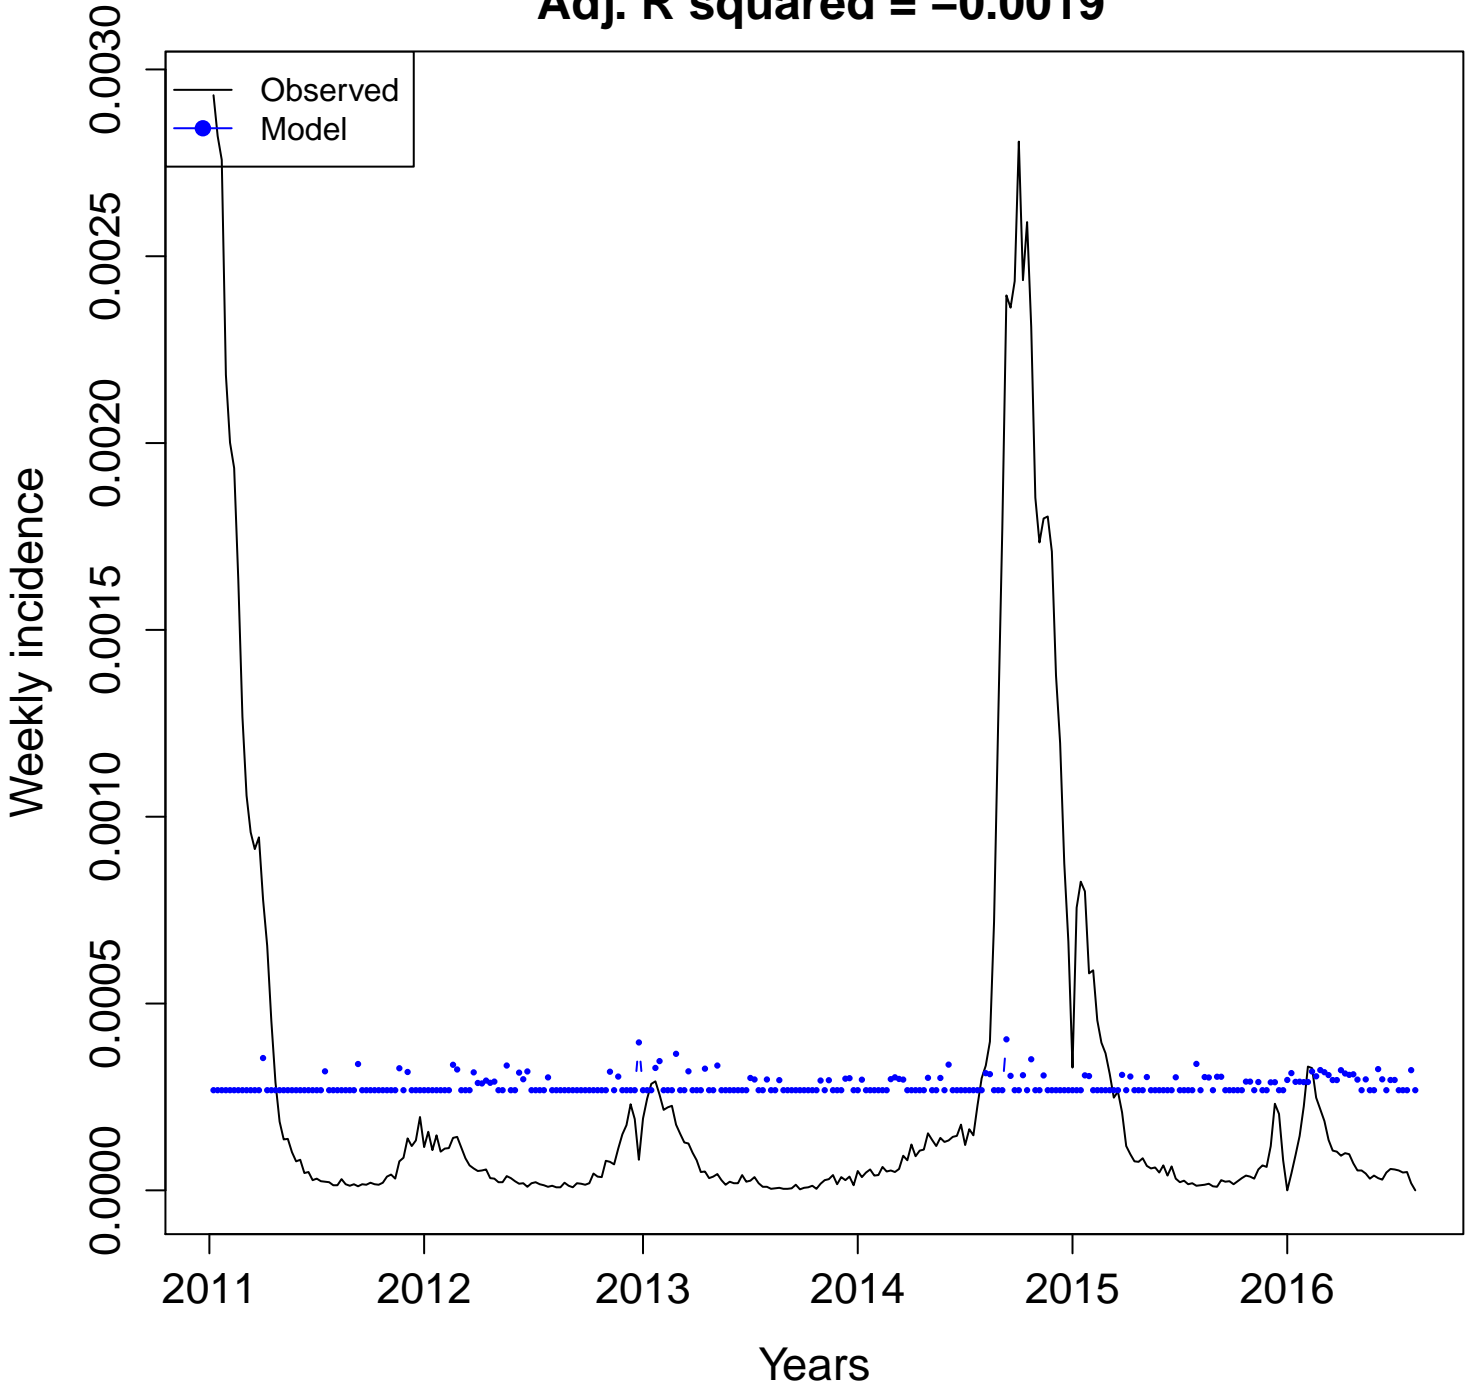

## Alagoas (AL)

# Dengue incidence vs. Google Health Trends (2011–2016)

### Definitions:

- **Combined terms:**
  - **All:** model with all the available terms.  $n$  = number of terms
  - **Four:** model with "dengue", "dengue sintomas", "aedes", and "mosquito".
  - **Uncorrelated:** model with non-correlated terms.  $n$  = number of uncorrelated terms
- **Individual terms:** Plots developed with one term at a time.
- Terms for all and uncorrelated models can be found in additional file 3.



**Combined terms**  
**Adjusted R squared**

**Alagoas (AL)**

All  
(n = 8)

BR-AL  
Adj. R squared = 0.4807

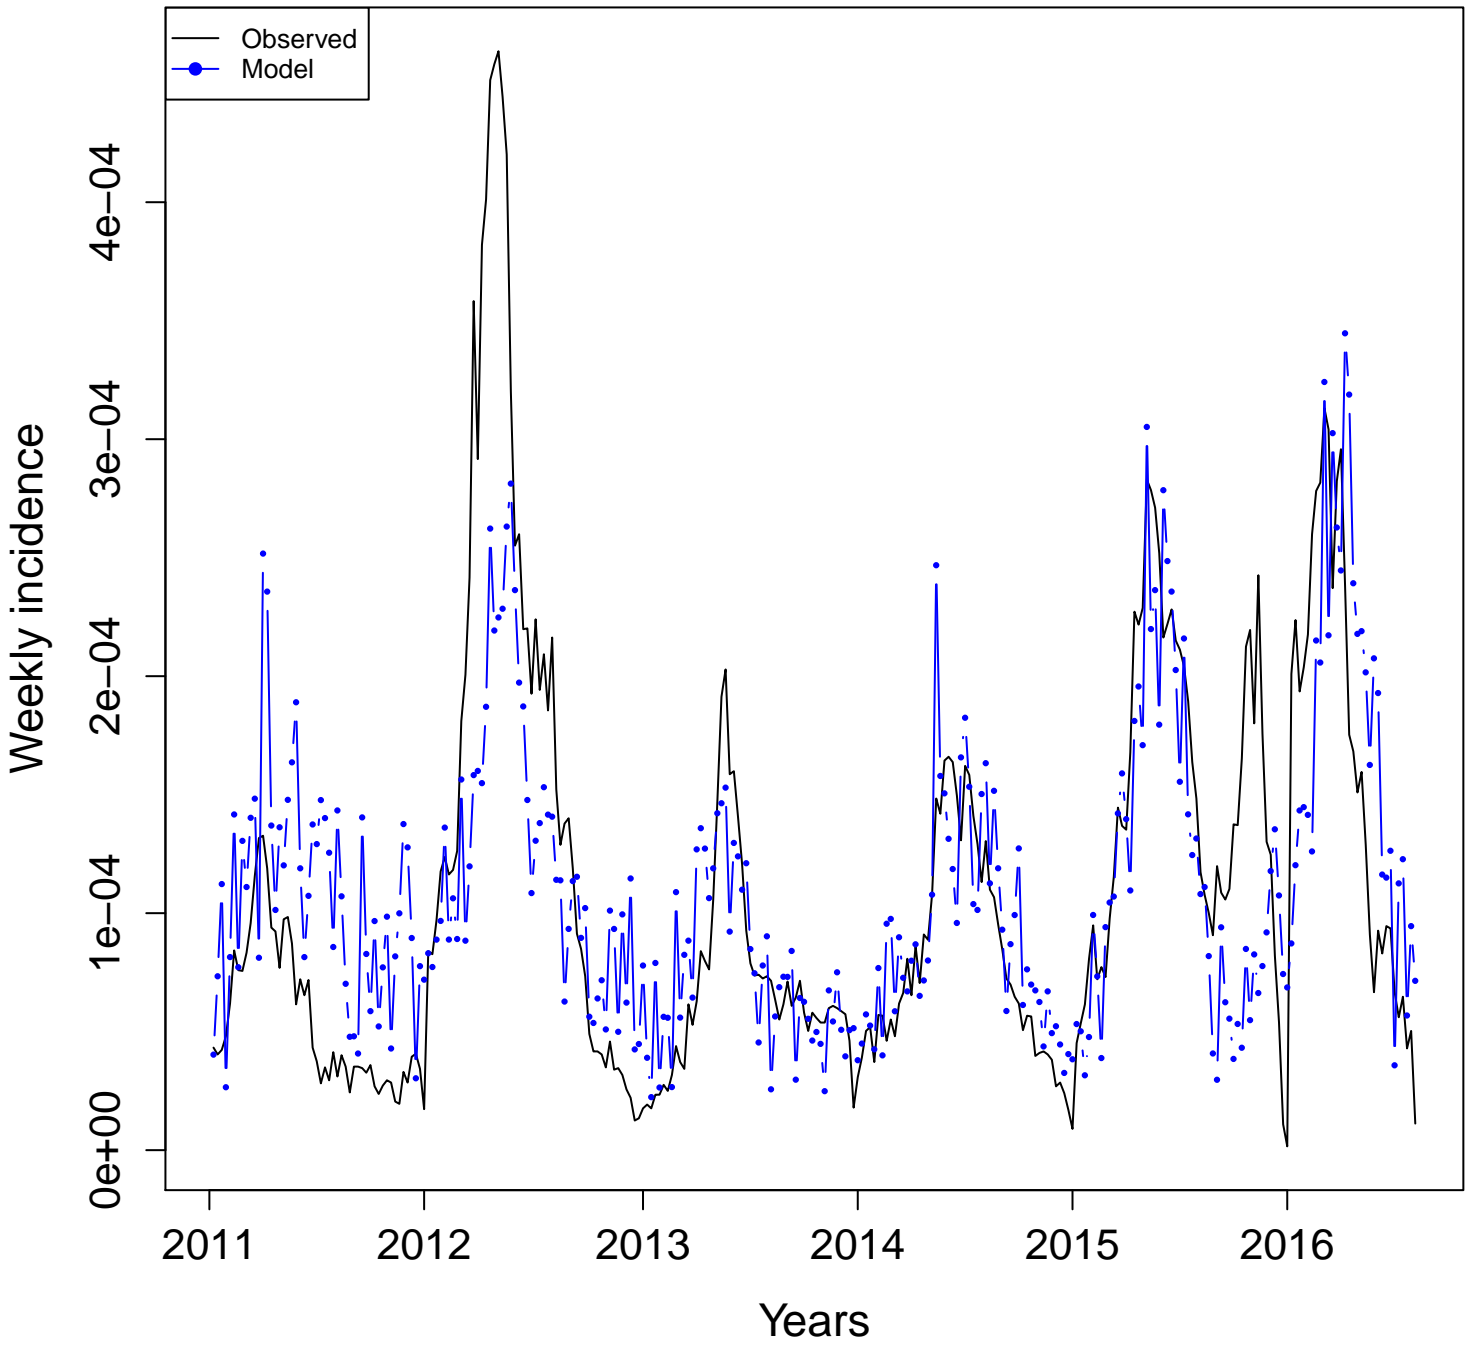

**BR-AL**  
**Adj. R squared = 0.4702**

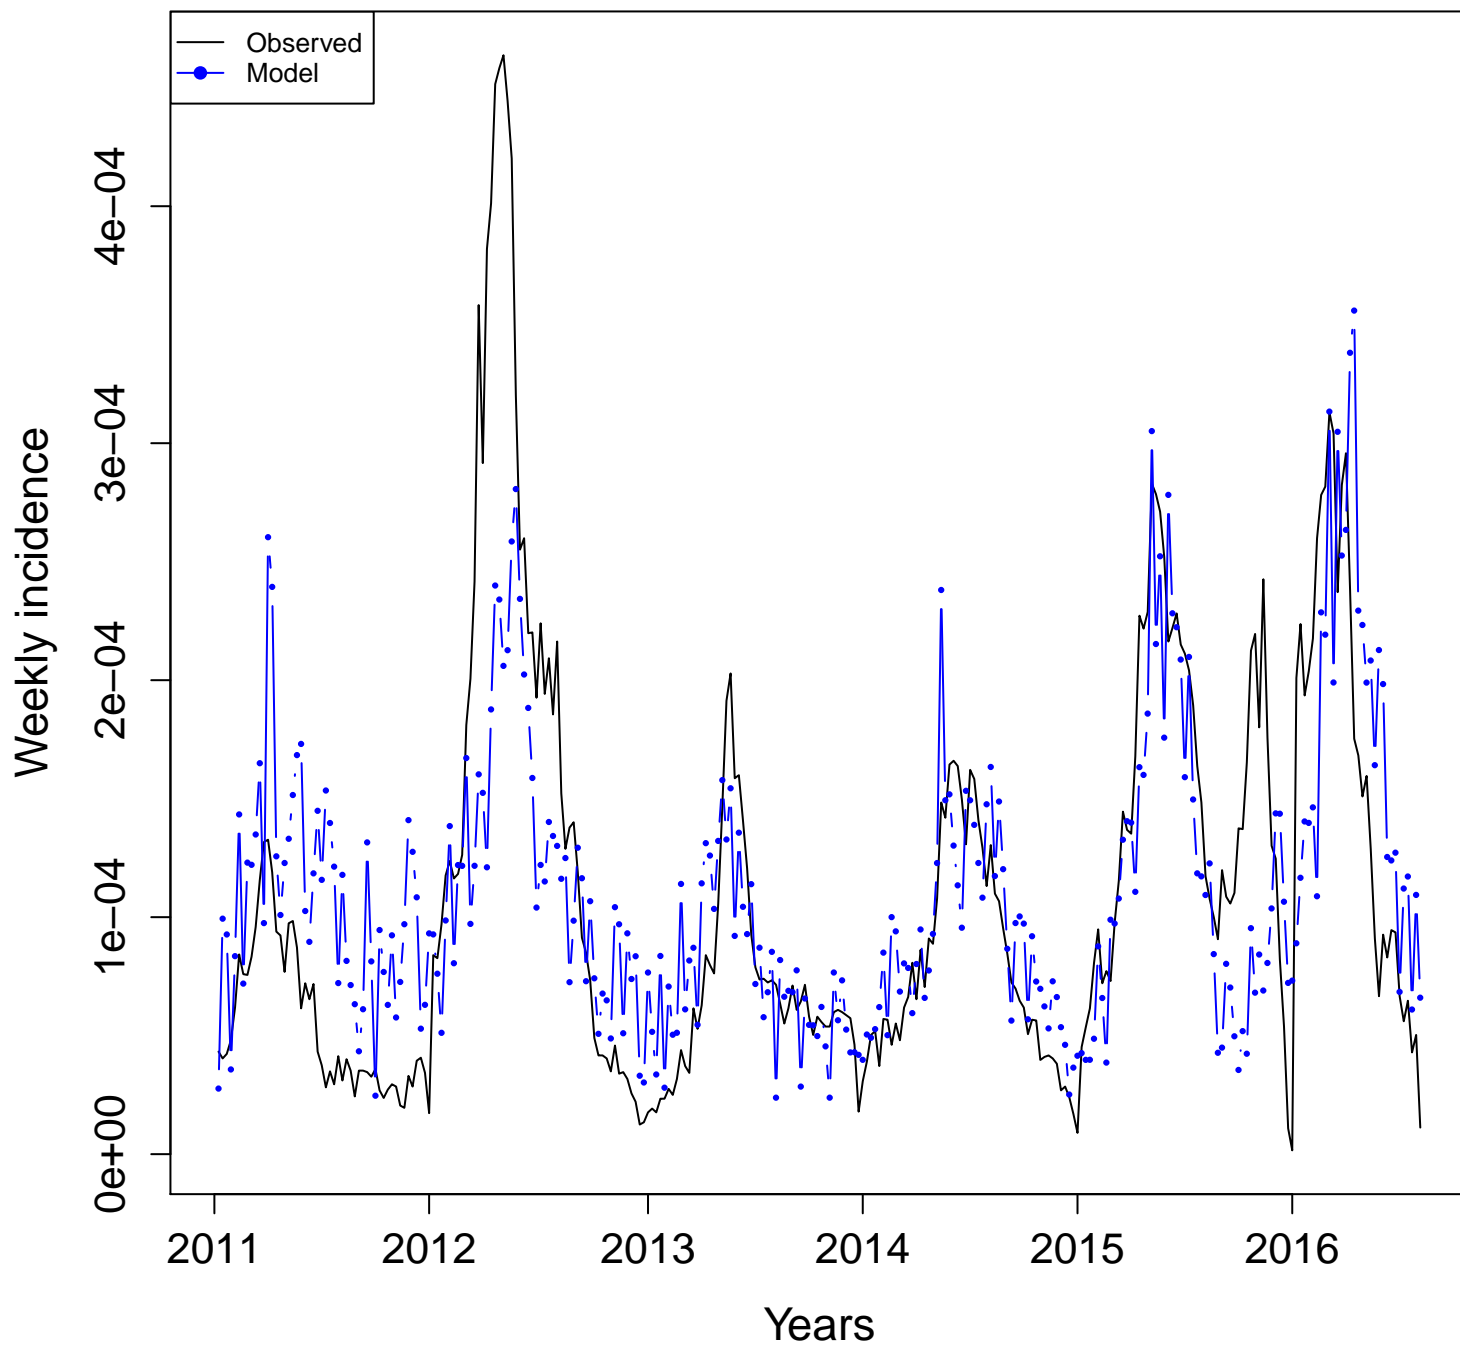

**Uncorrelated  
(n = 3)**

**BR-AL  
Adj. R squared = 0.4182**

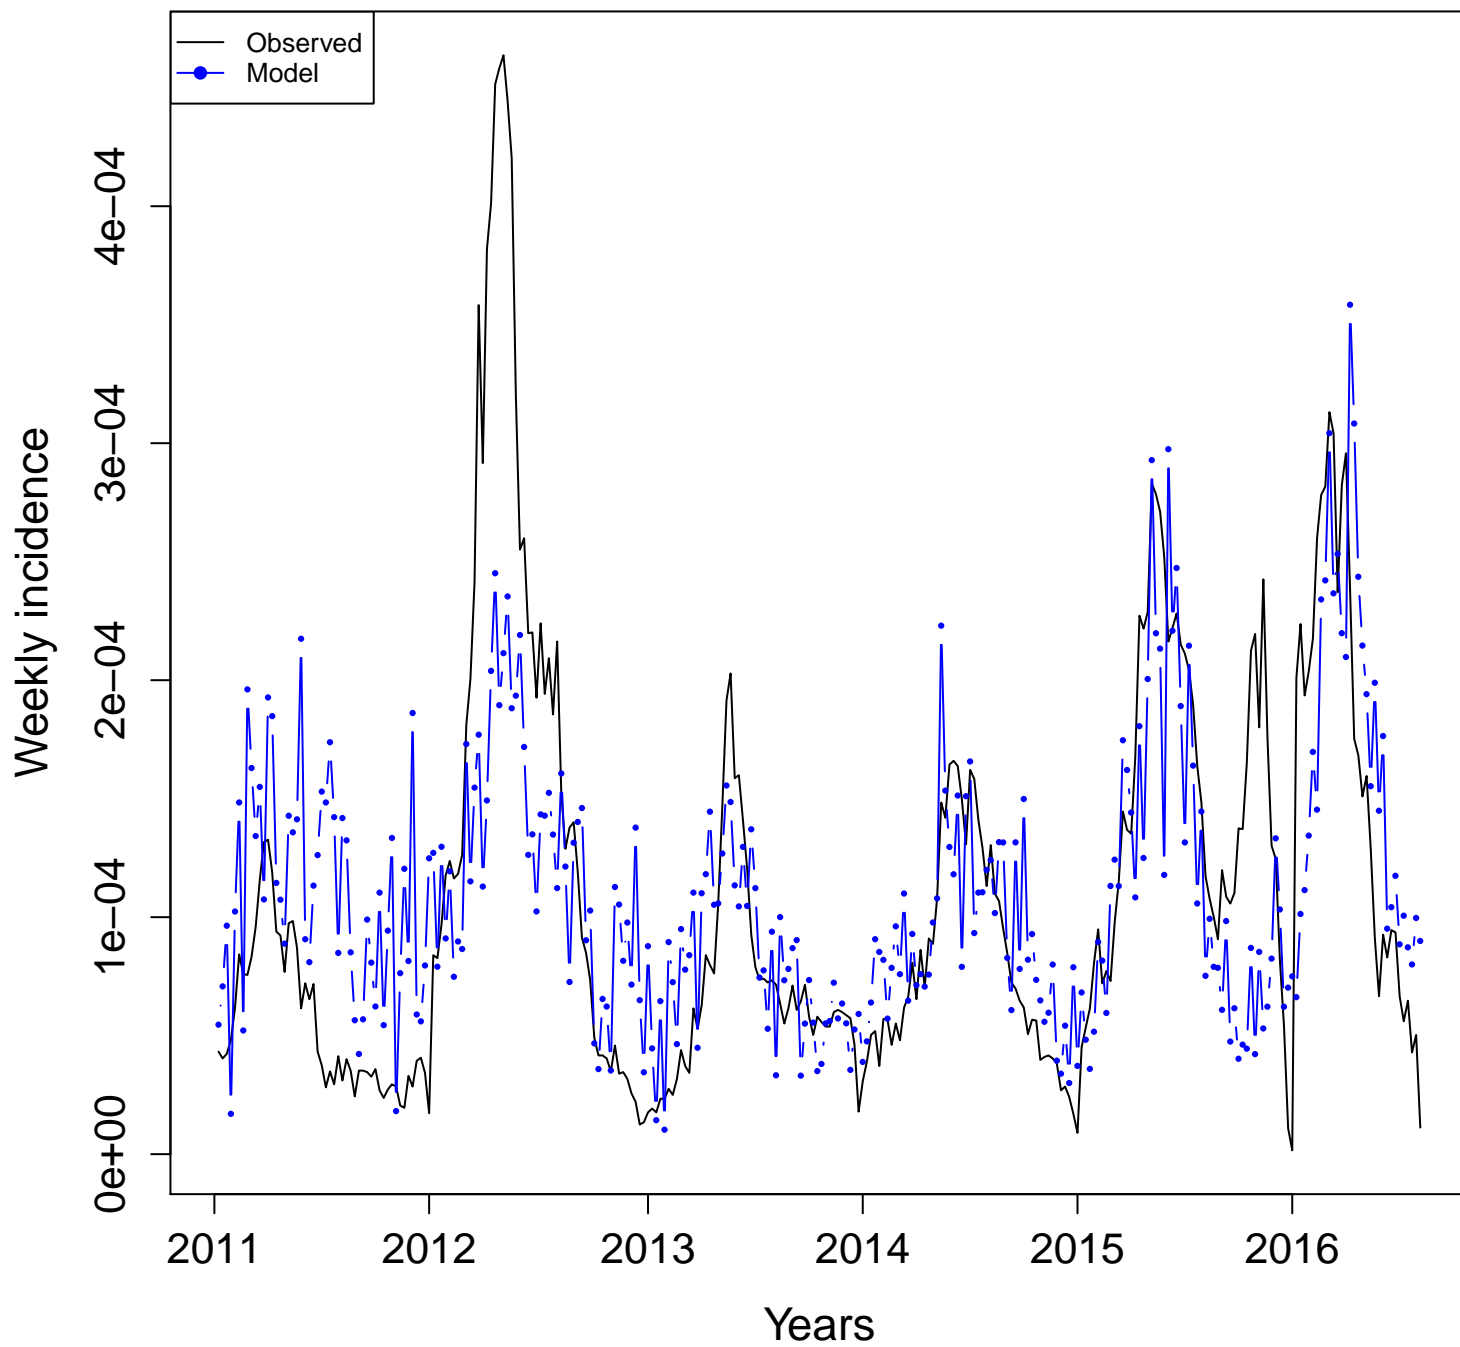

**Individual terms**  
**Adjusted R squared**

**Alagoas (AL)**

**AL- aedes.aegypti**  
**Adj. R squared = 0.1212**

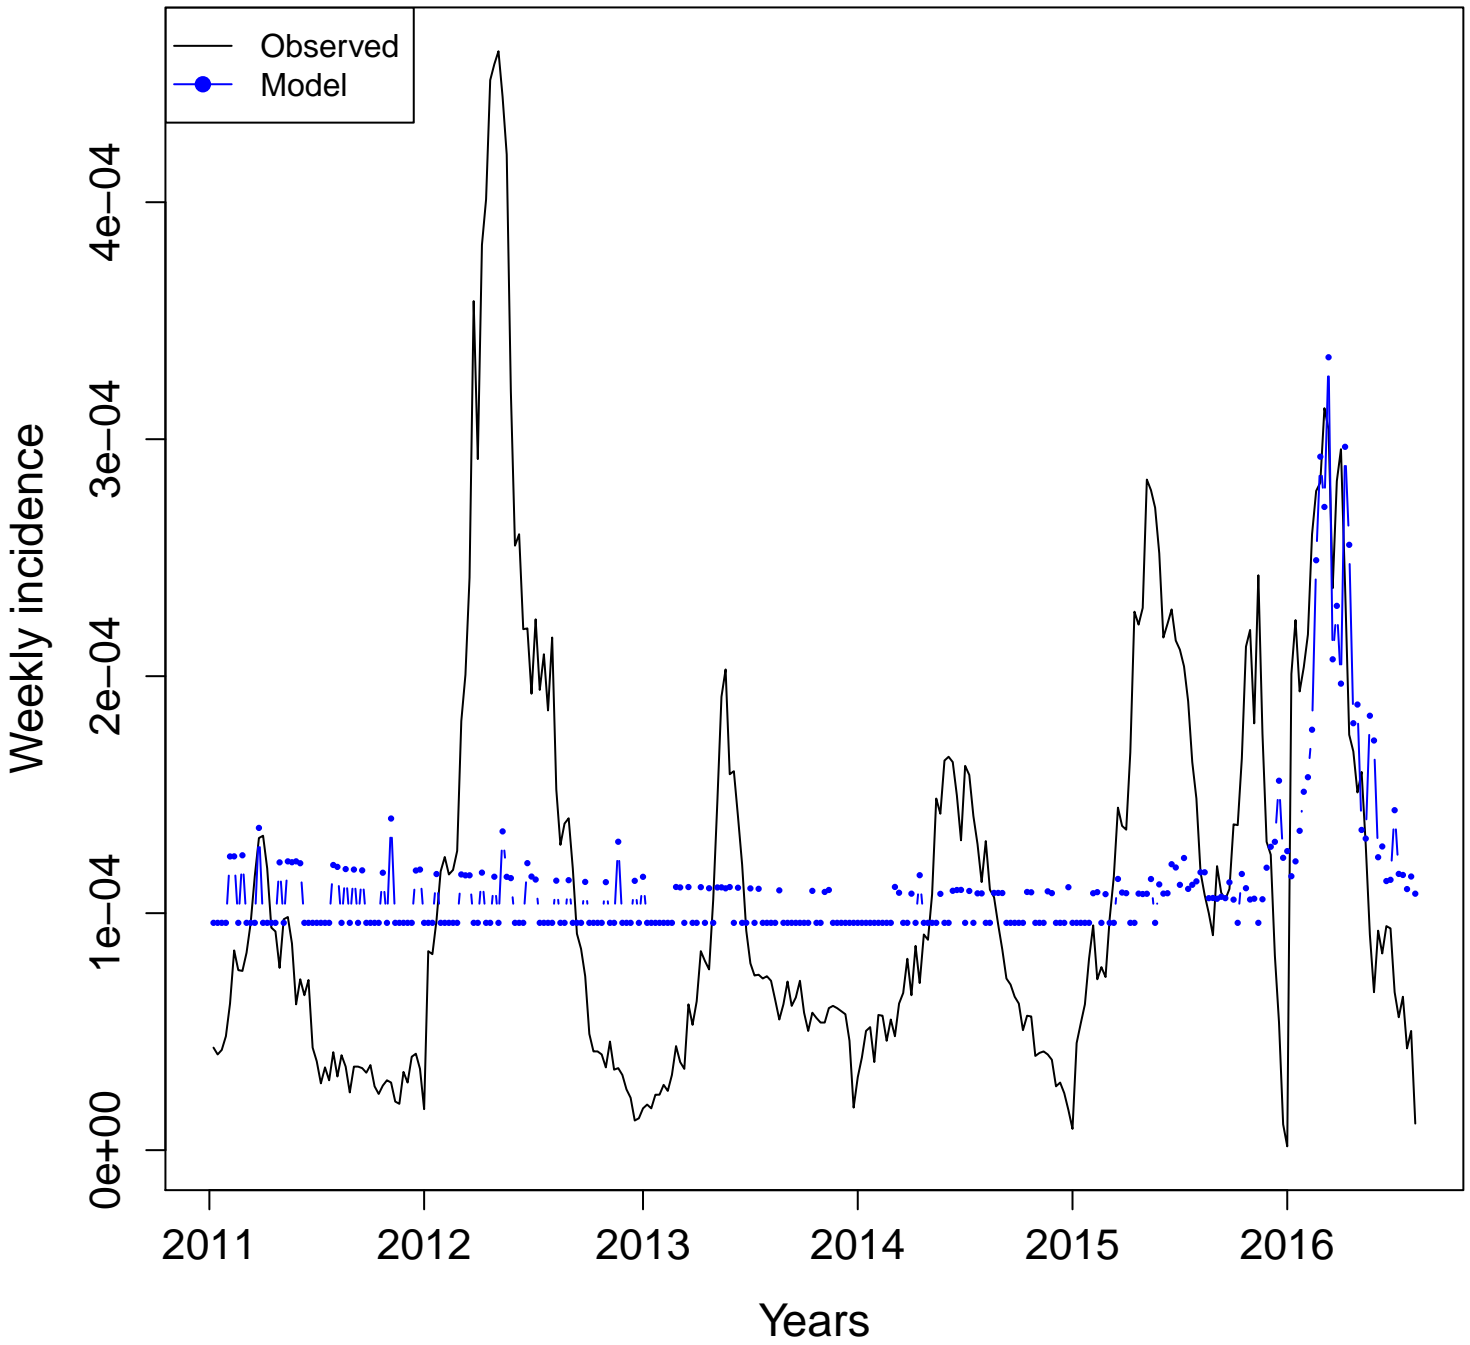

**AL- aedes**  
**Adj. R squared = 0.1107**

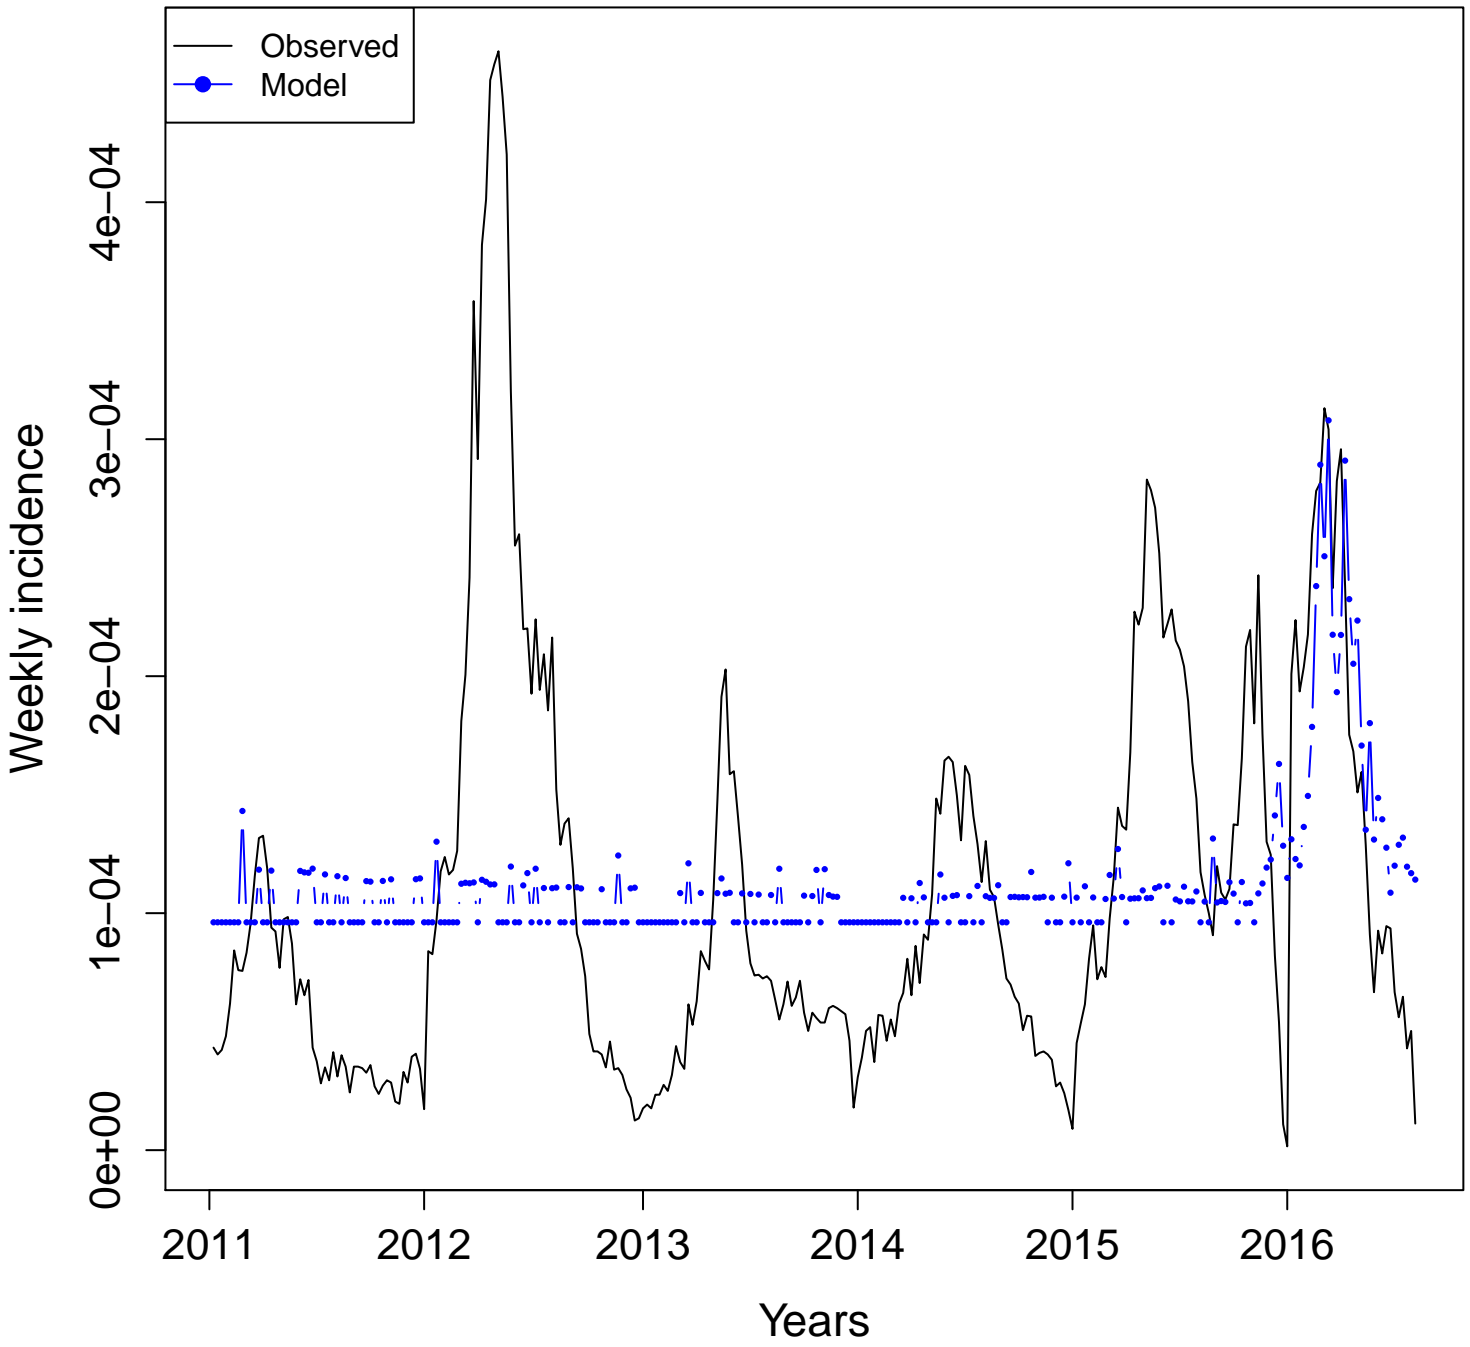

**AL- aegypti**  
**Adj. R squared = 0.1238**

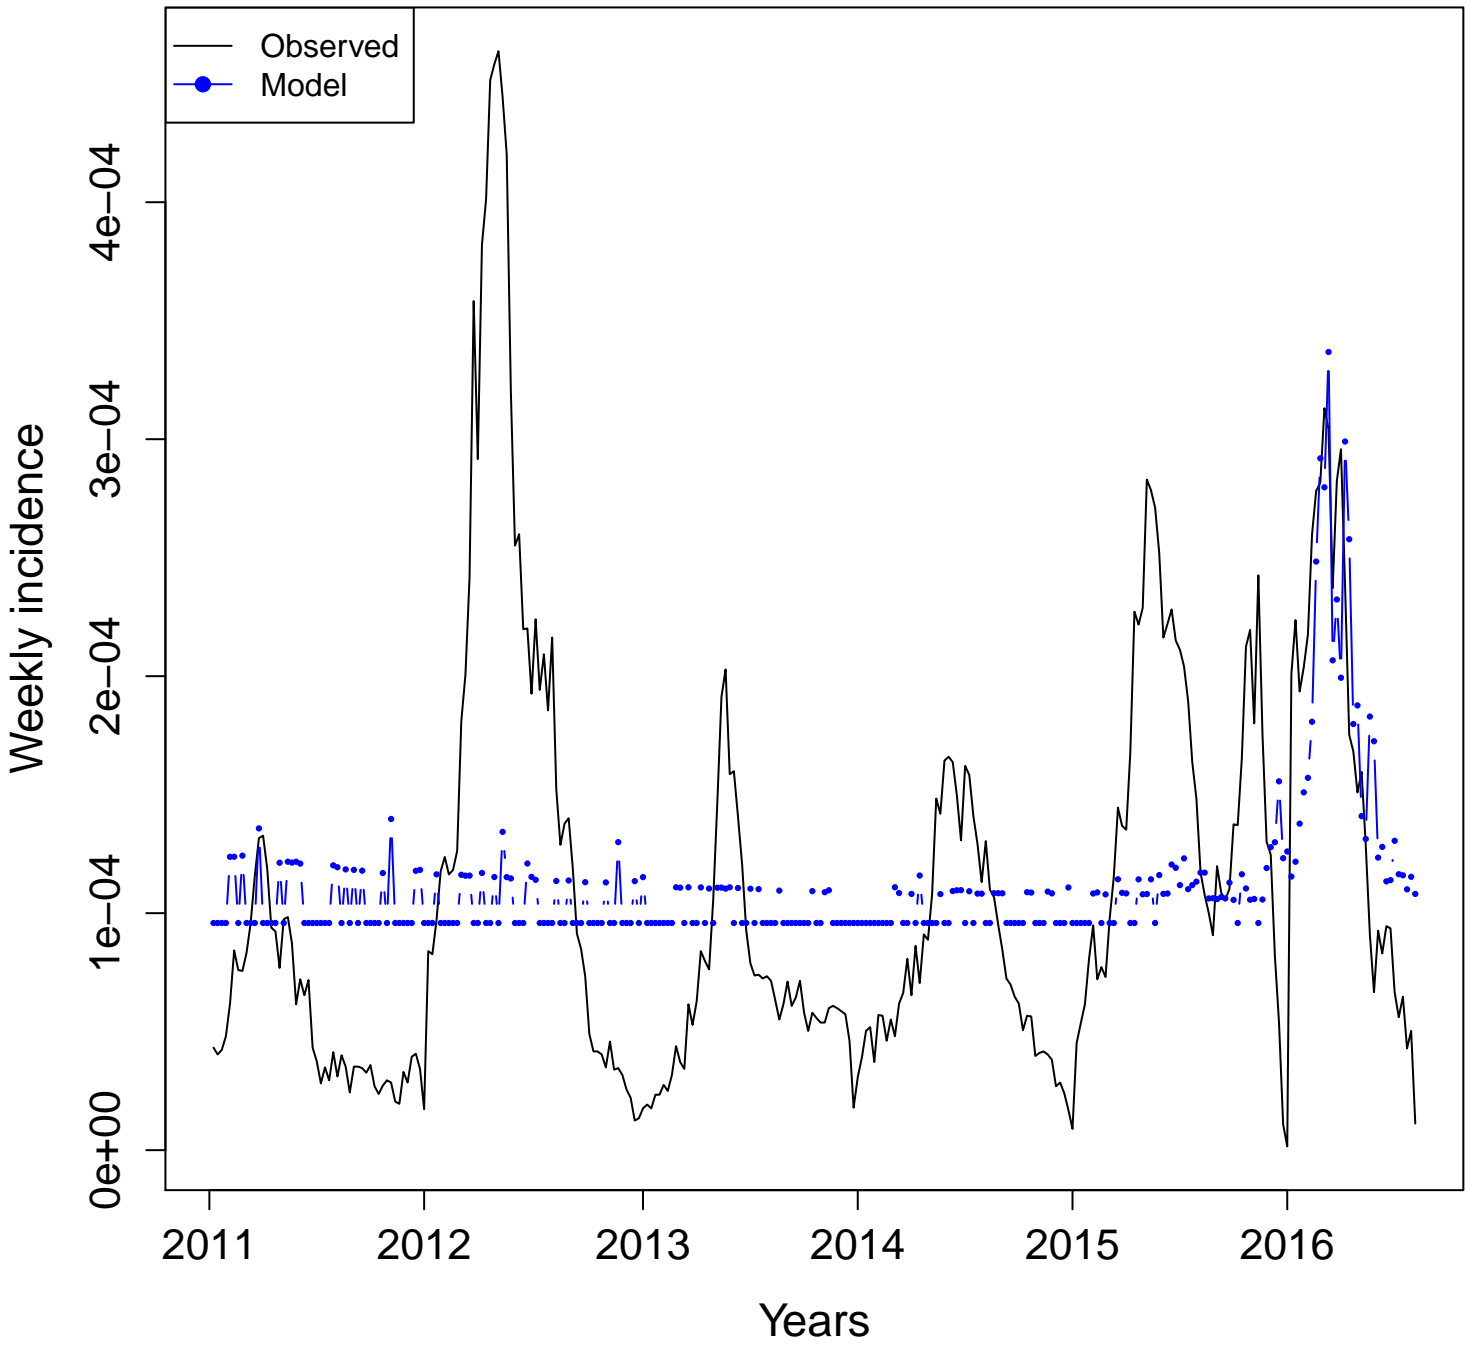



# AL- dengue

Adj. R squared = 0.3605

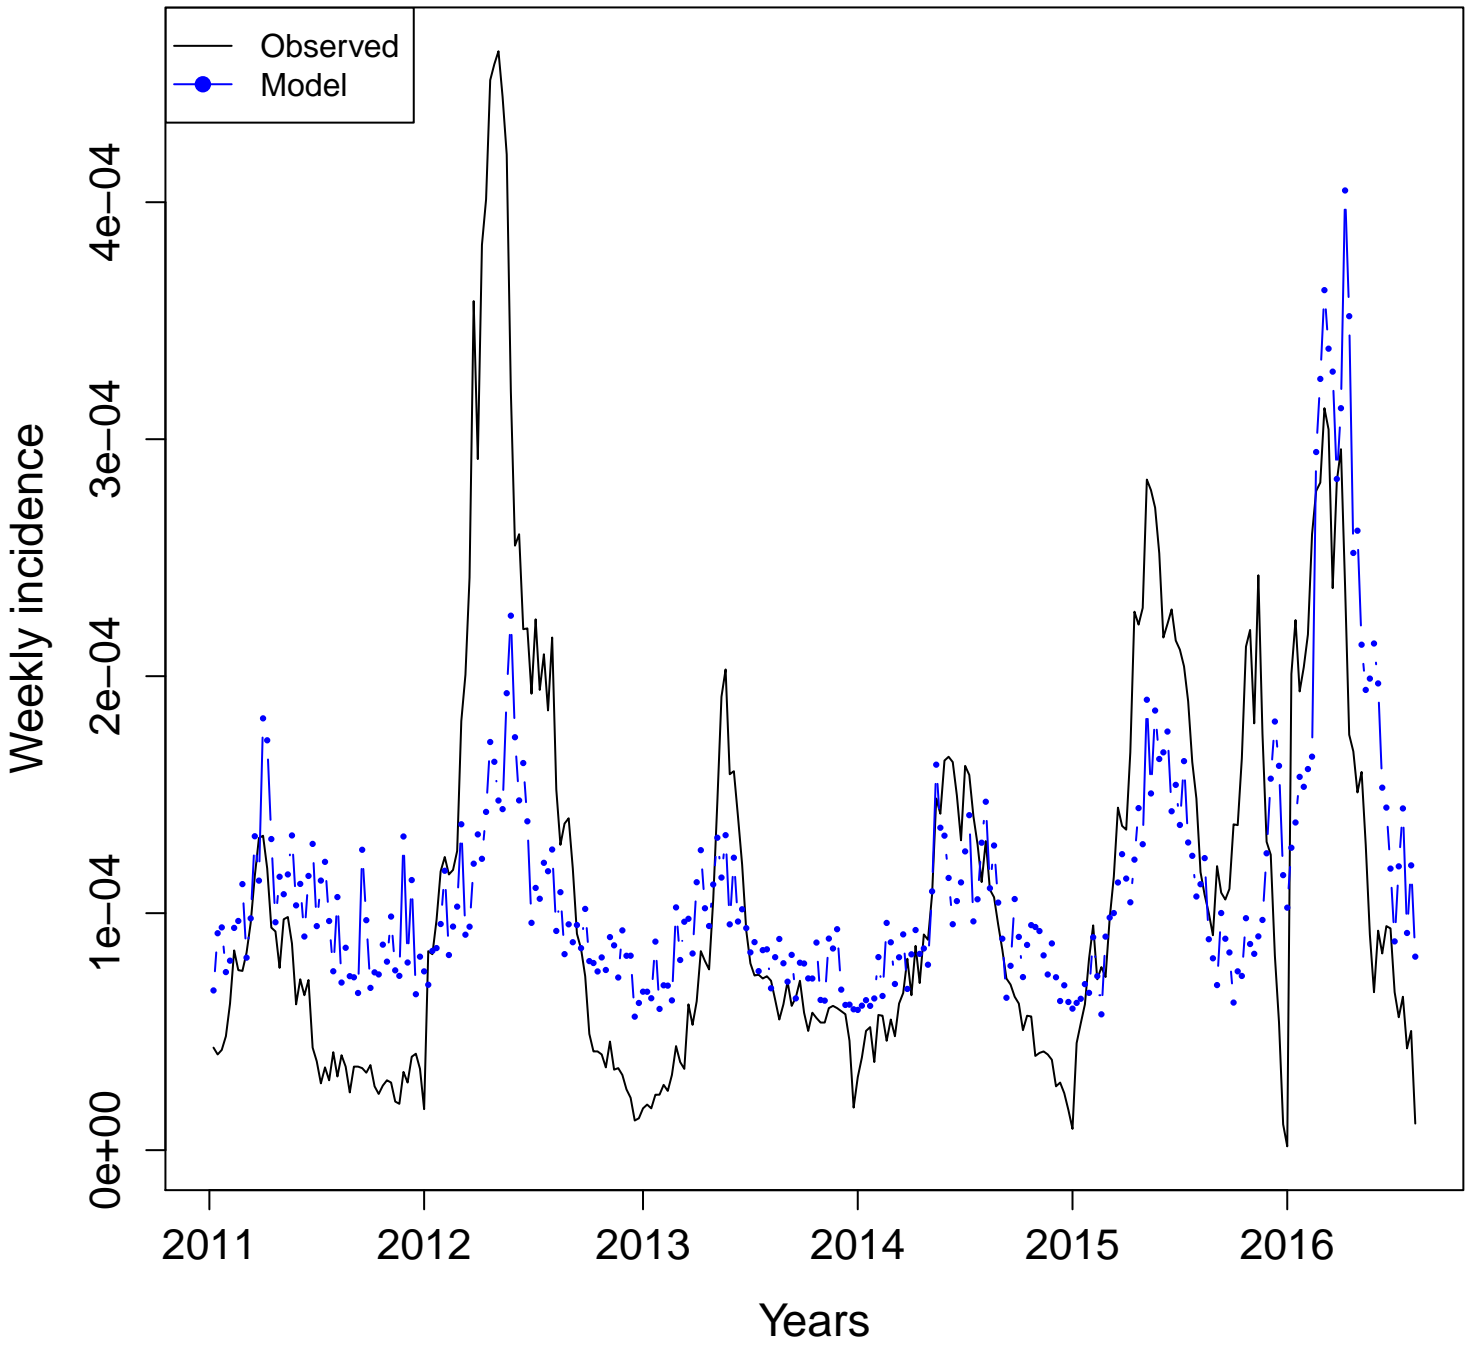

**AL- dengue.sintomas**  
**Adj. R squared = 0.3877**

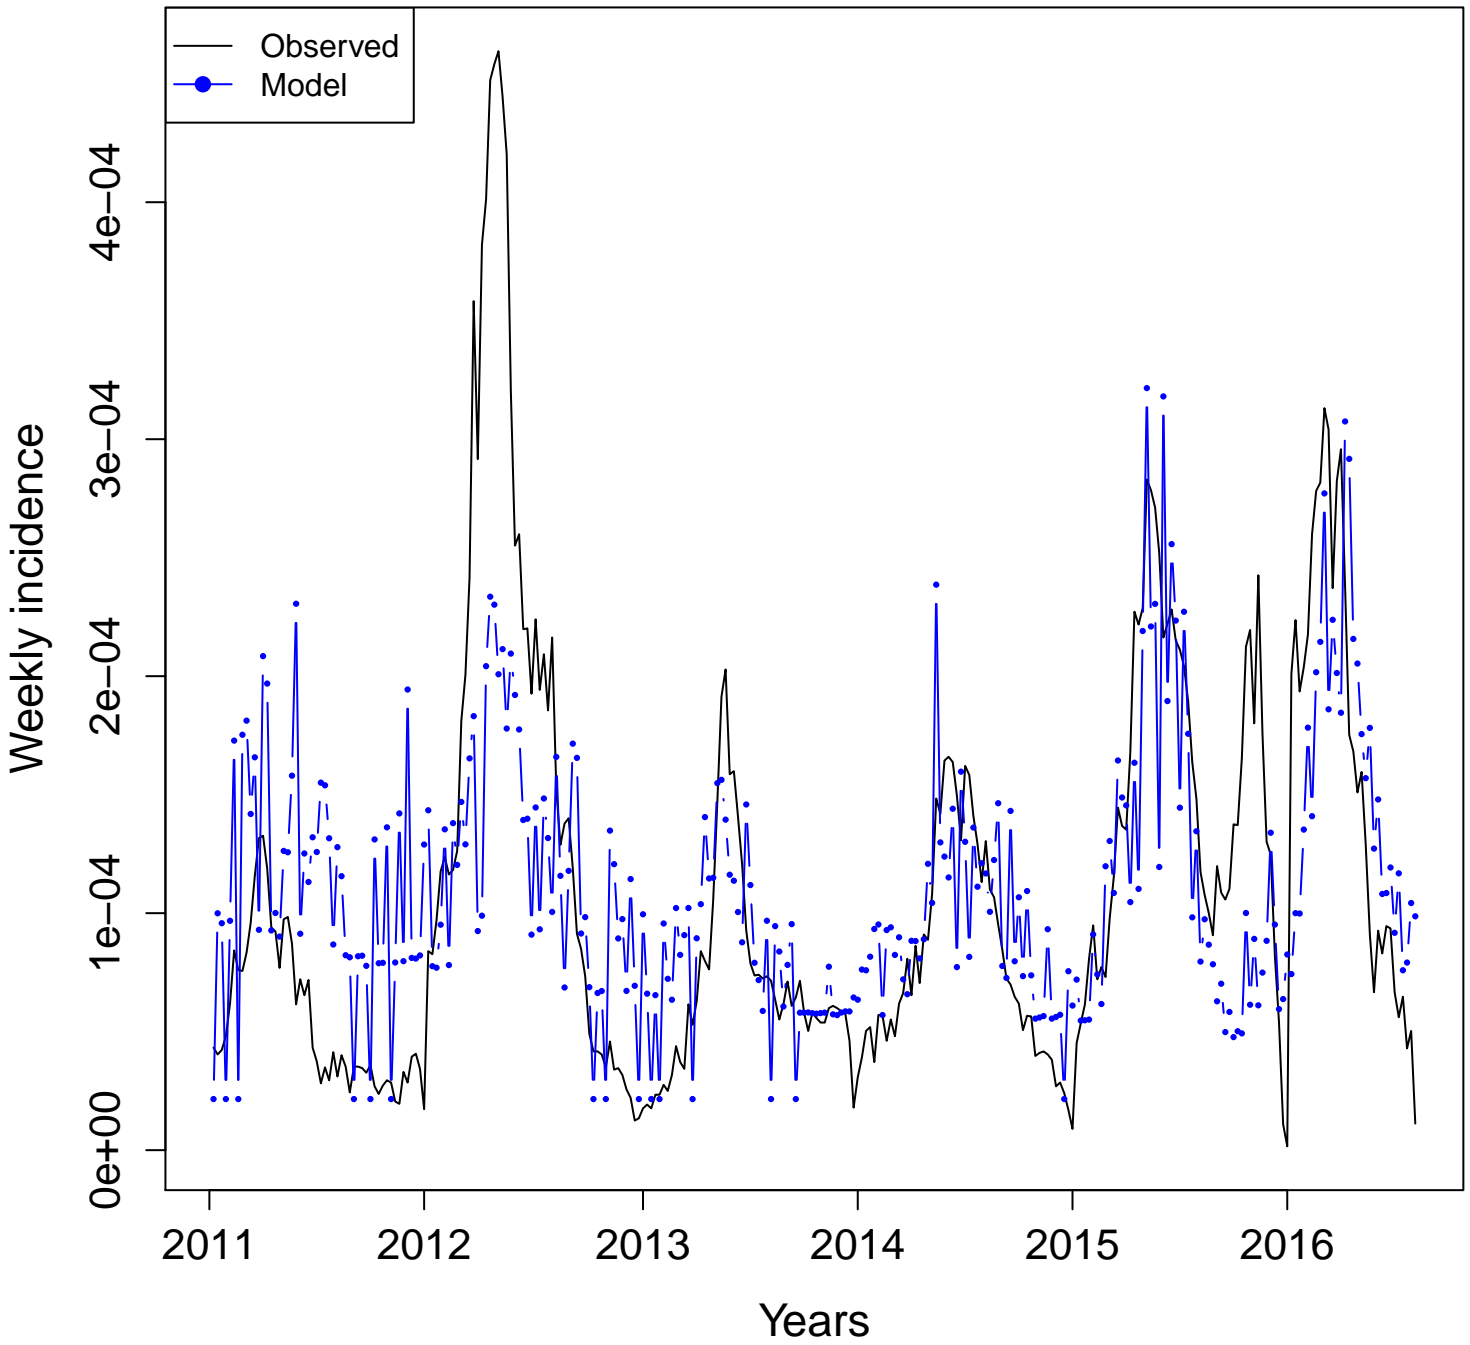

**AL- mosquito.dengue**  
**Adj. R squared = 0.1463**

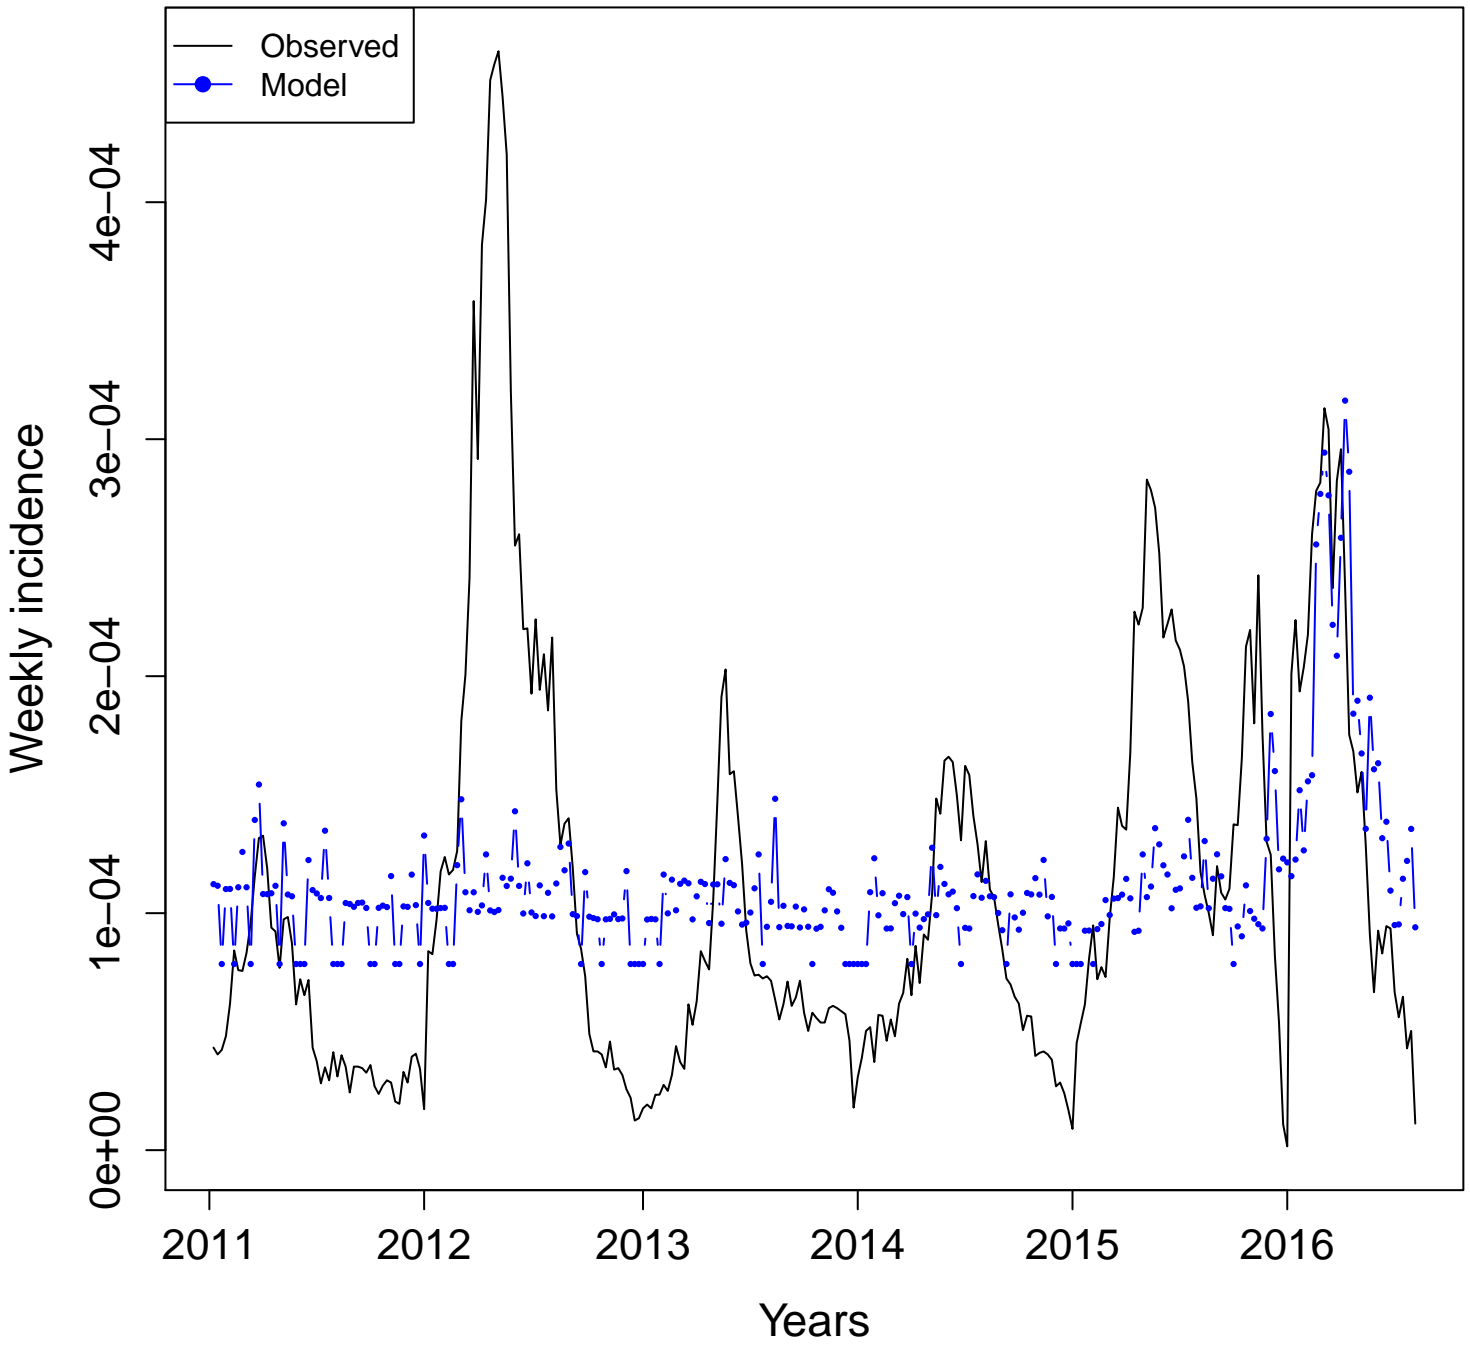

# AL- mosquito

Adj. R squared = 0.1693

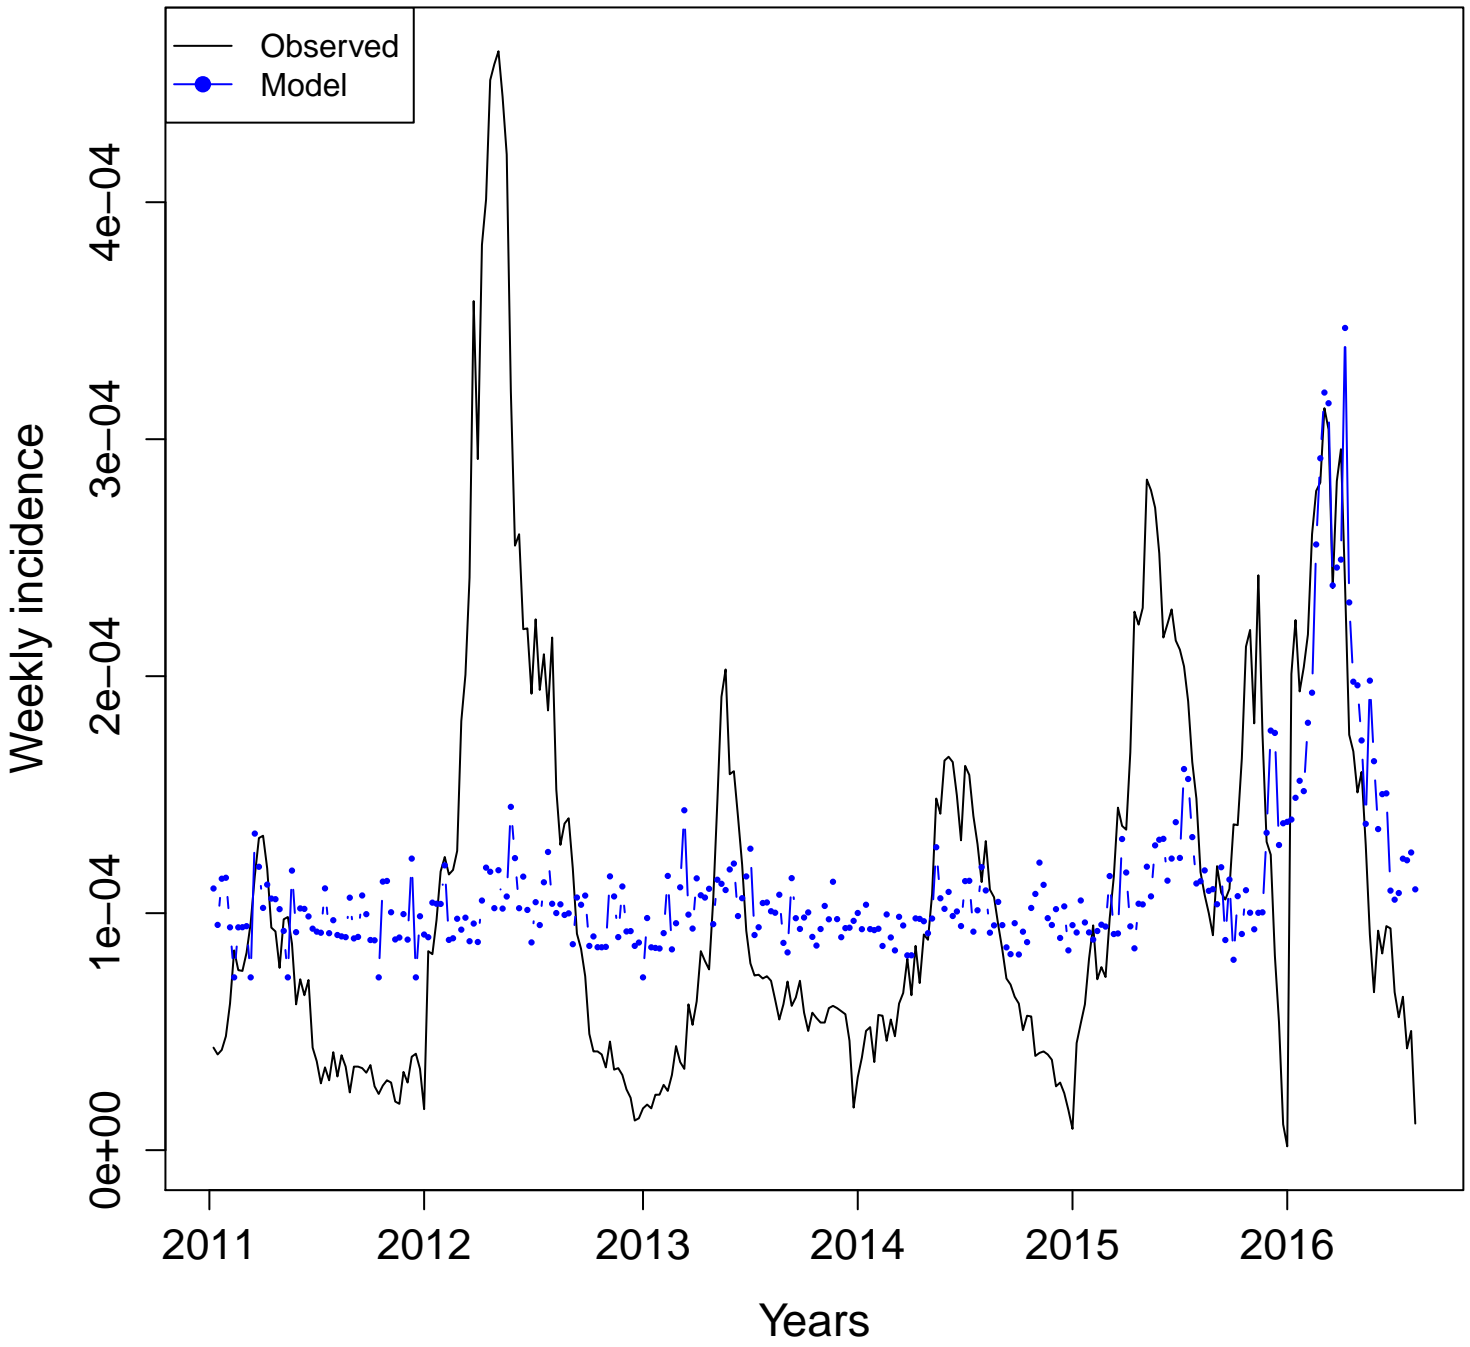

**AL- sintomas.da.dengue**  
**Adj. R squared = 0.3071**

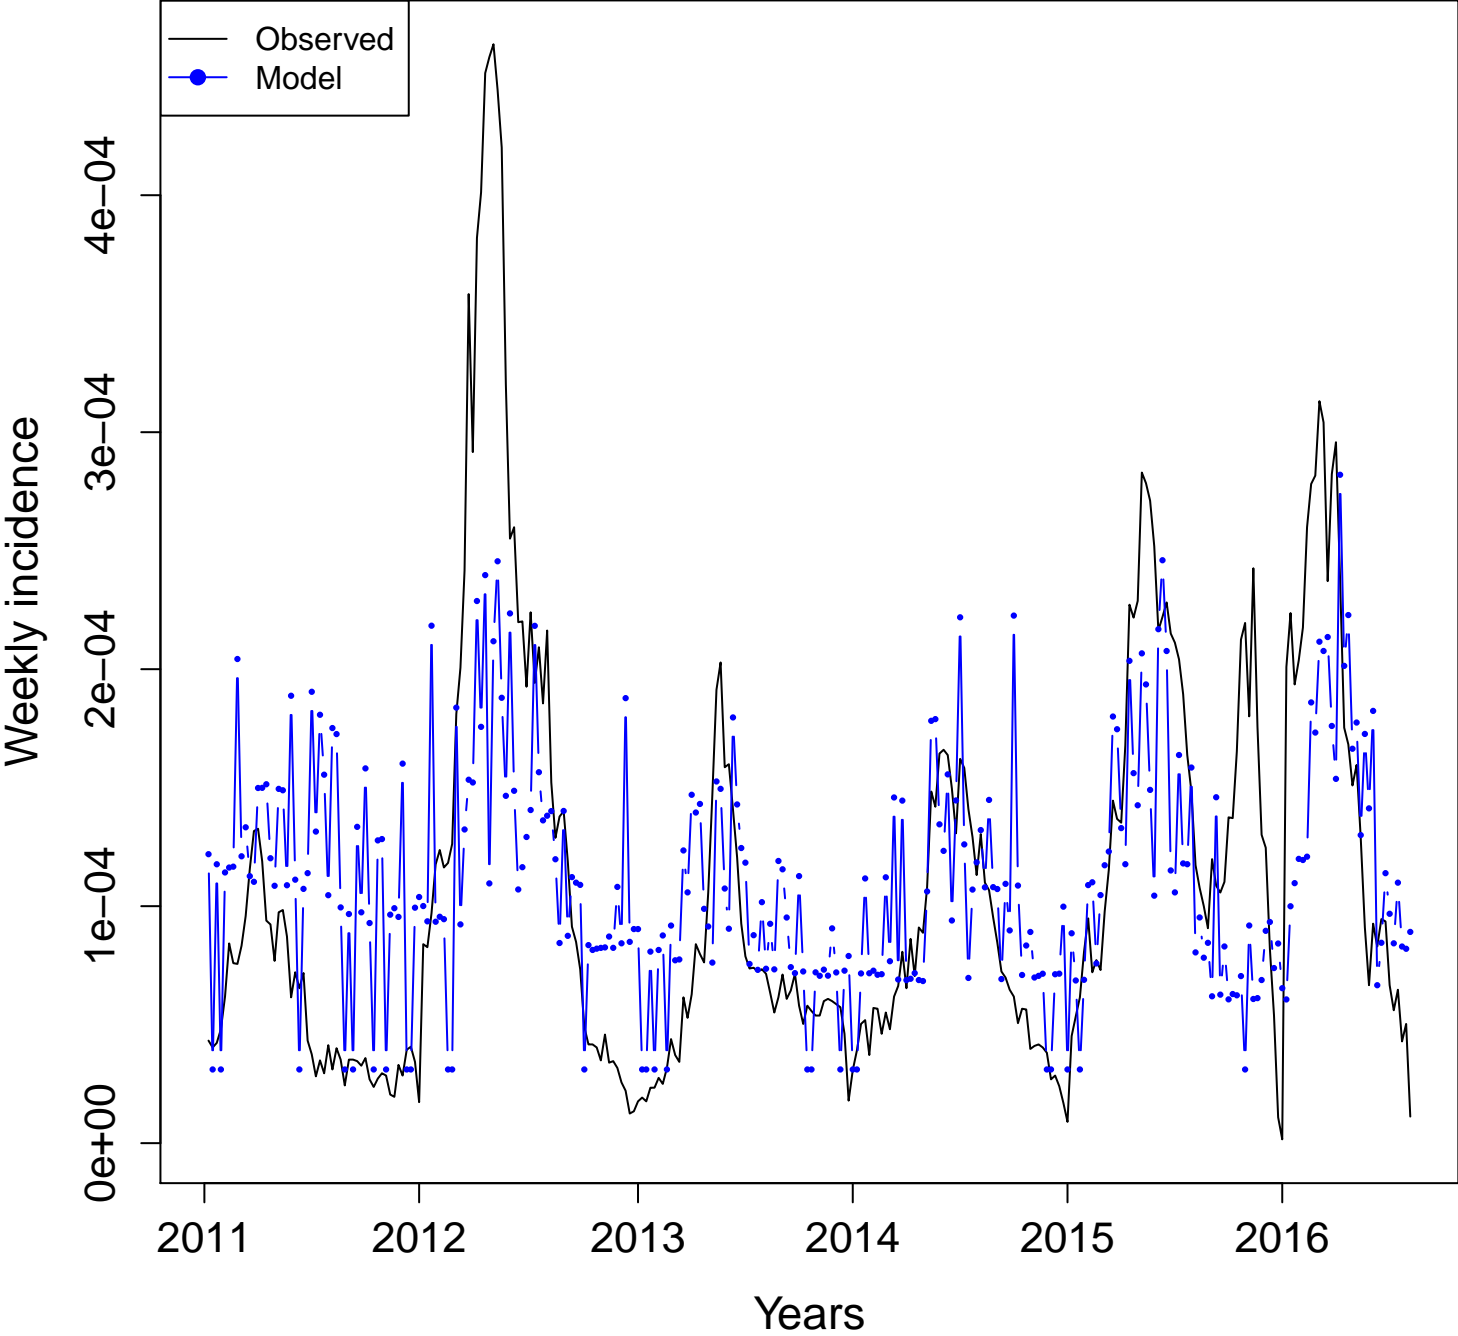

## Amazonas (AM)

# Dengue incidence vs. Google Health Trends (2011–2016)

### Definitions:

- **Combined terms:**
  - **All:** model with all the available terms.  $n =$  number of terms
  - **Four:** model with "dengue", "dengue sintomas", "aedes", and "mosquito".
  - **Uncorrelated:** model with non-correlated terms.  $n =$  number of uncorrelated terms
- **Individual terms:** Plots developed with one term at a time.
- Terms for all and uncorrelated models can be found in additional file 3.

**Combined terms**  
**Adjusted R squared**

**Amazonas (AM)**

All  
(n = 9)

BR-AM  
Adj. R squared = 0.8469

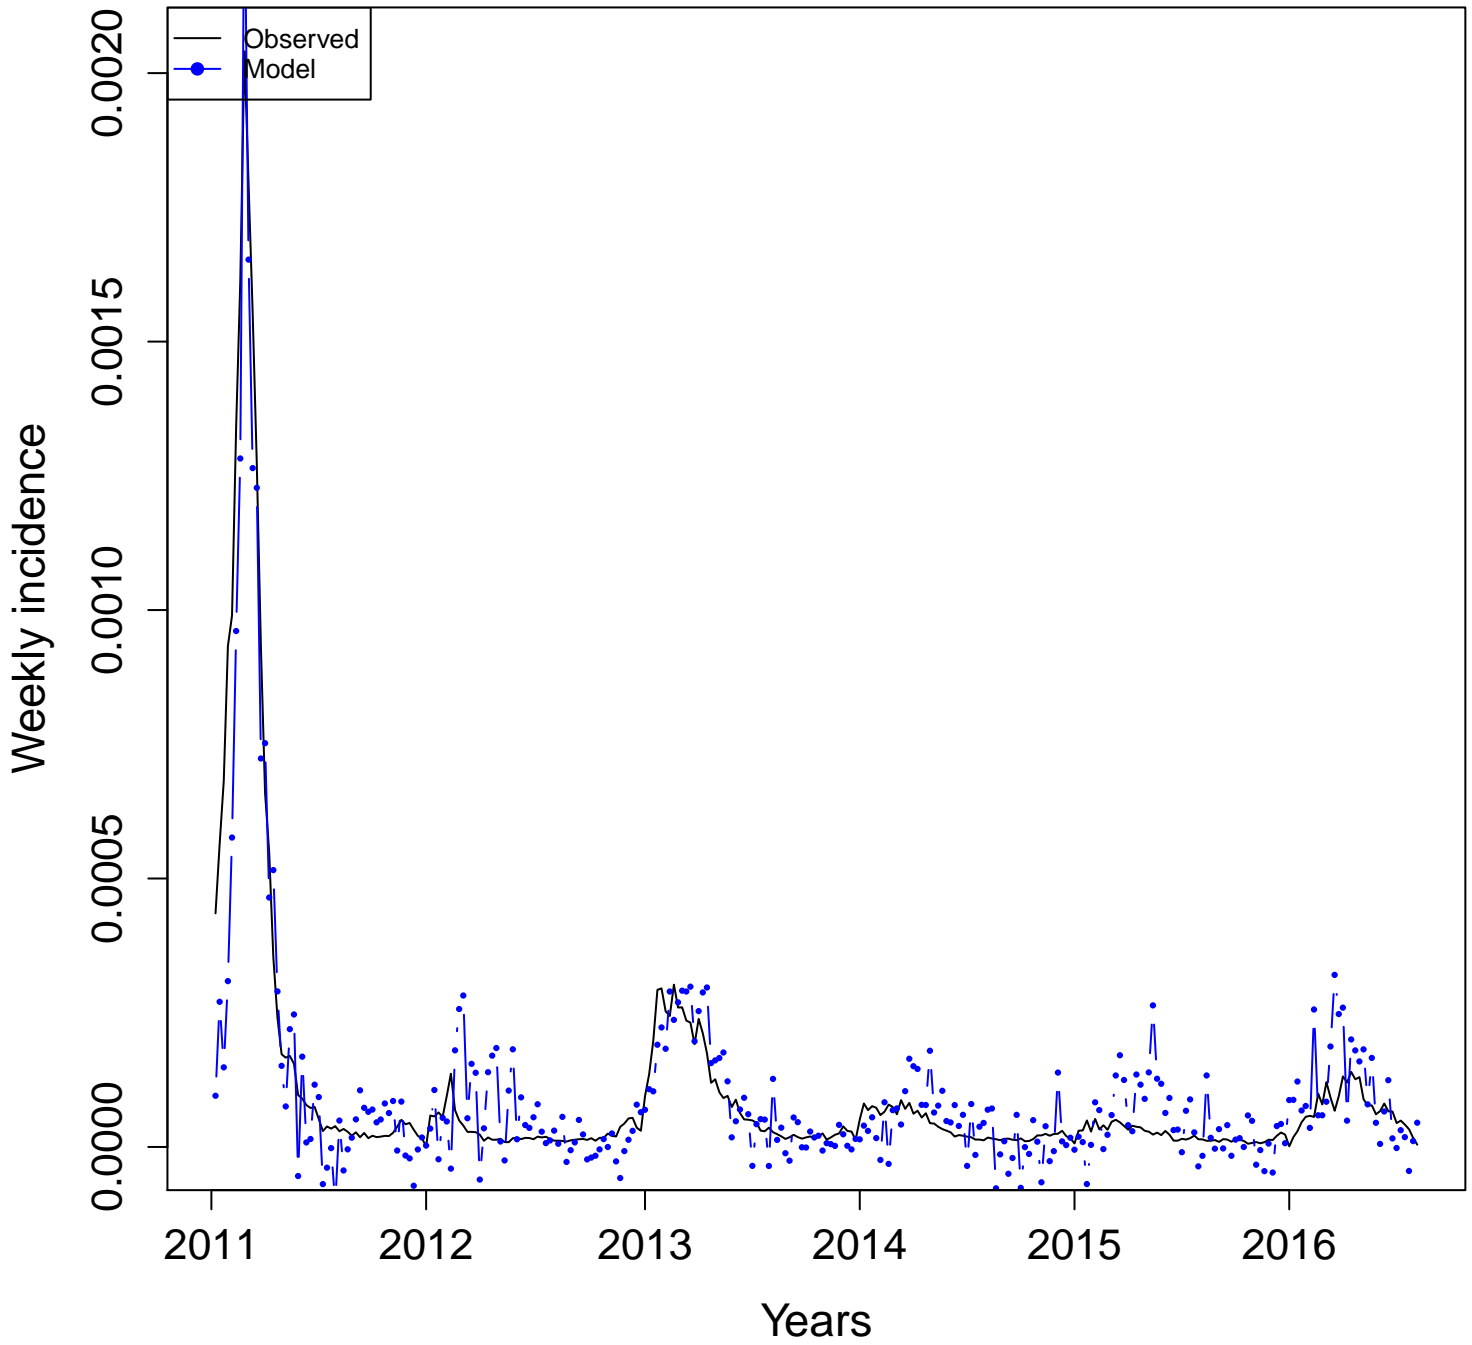



**BR-AM**  
**Adj. R squared = 0.8205**

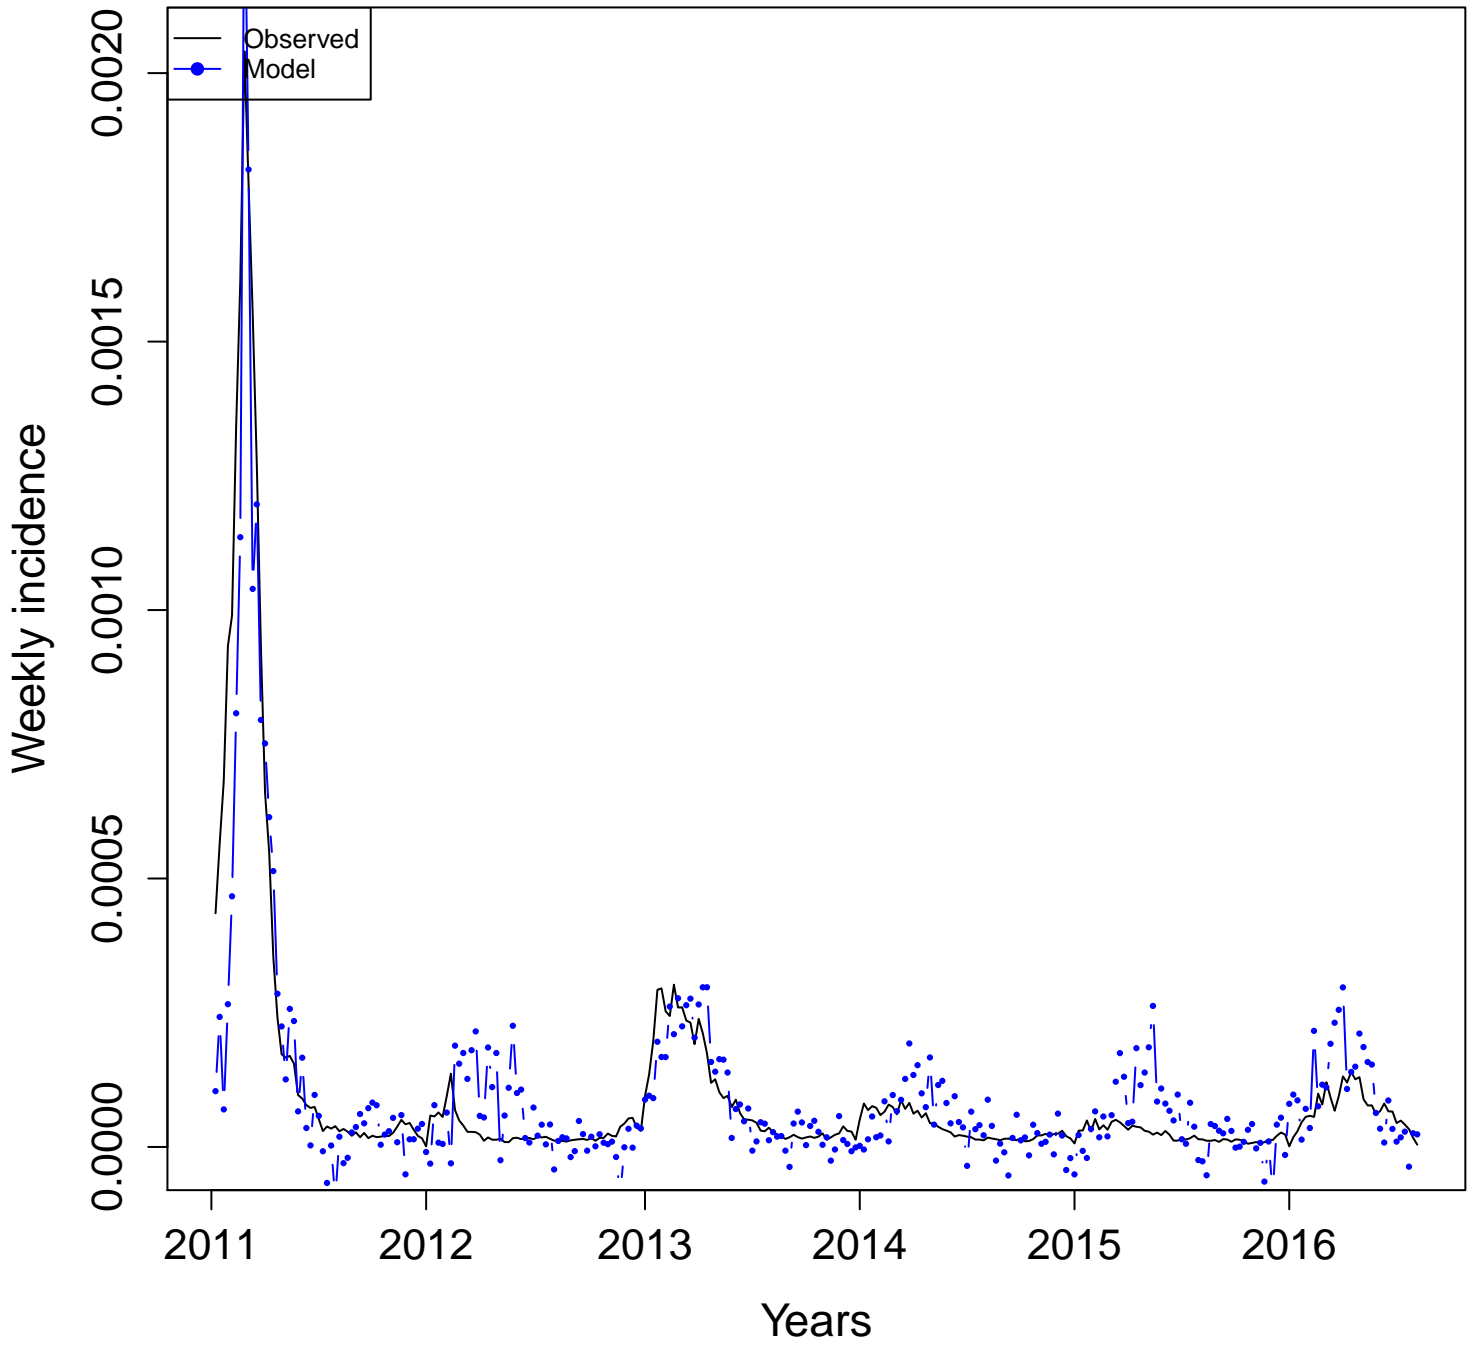

**Uncorrelated  
(n = 2)**

**BR-AM  
Adj. R squared = 0.59**

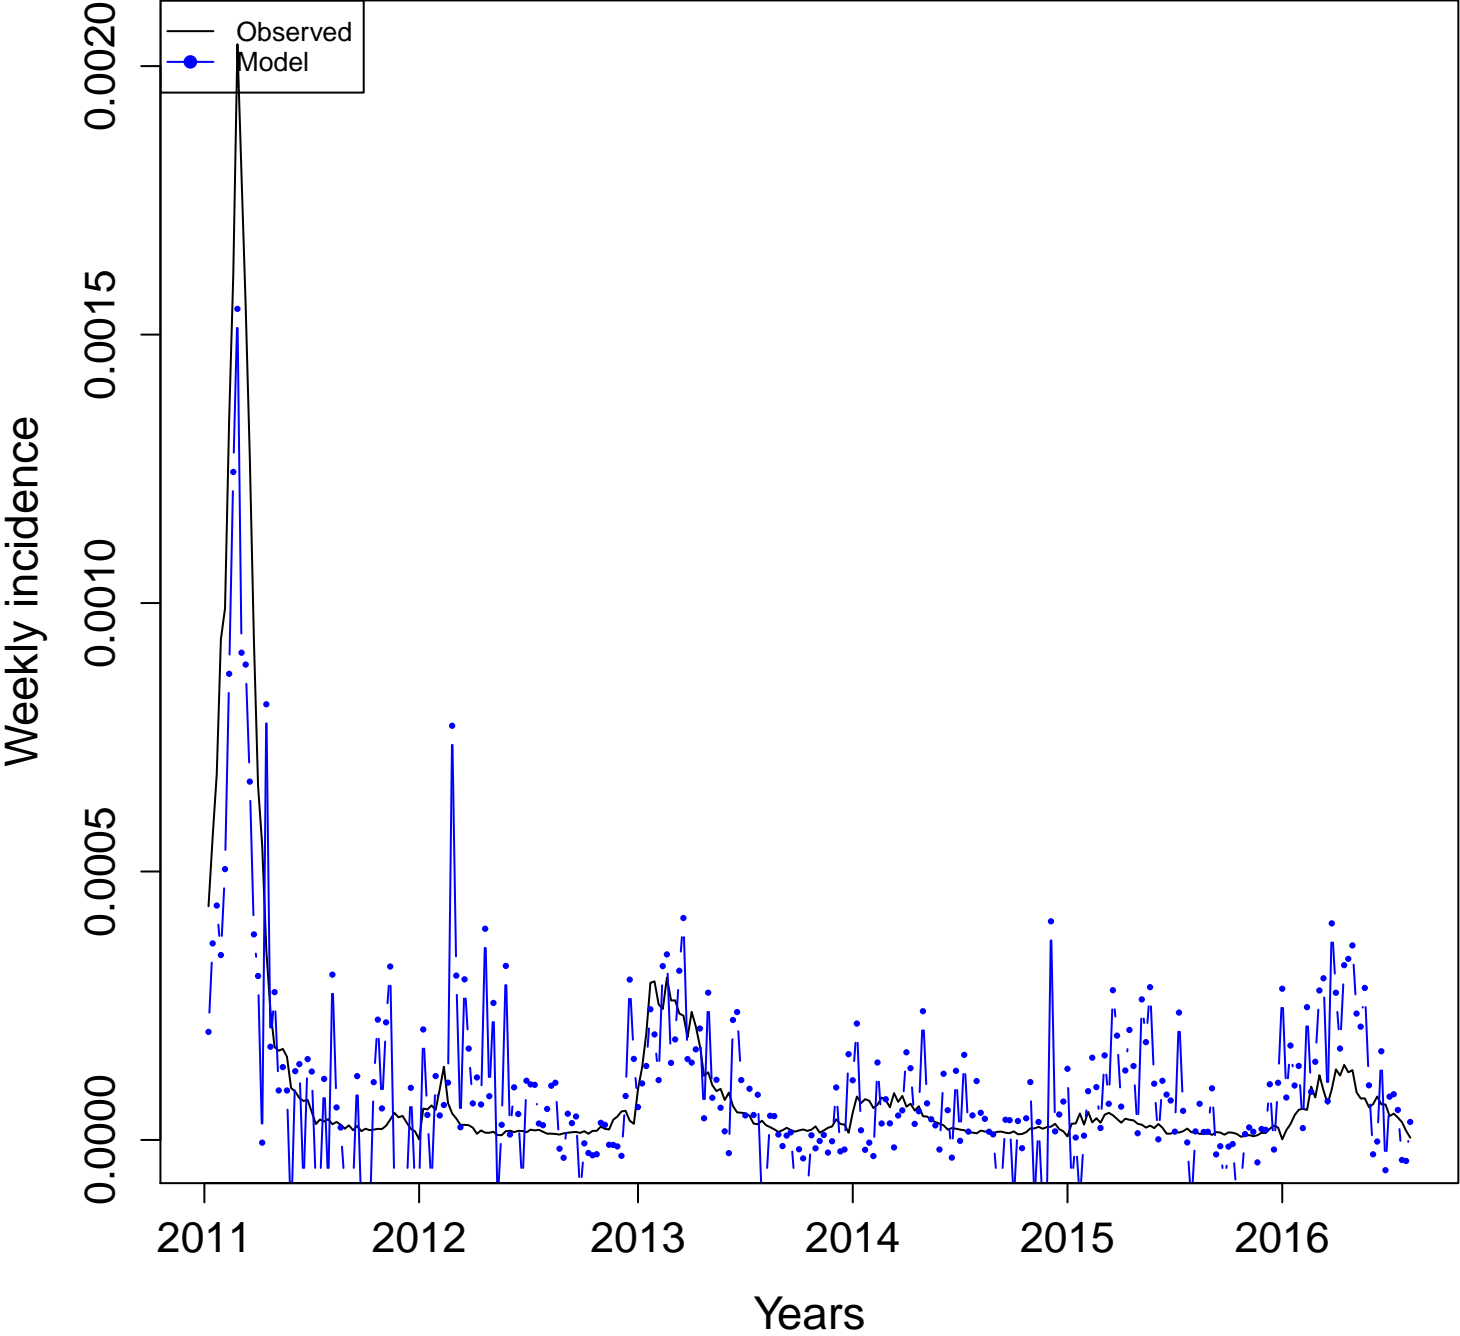

**Individual terms**  
**Adjusted R squared**

**Amazonas (AM)**

**AM- aedes.aegypti**  
**Adj. R squared = 0.0013**

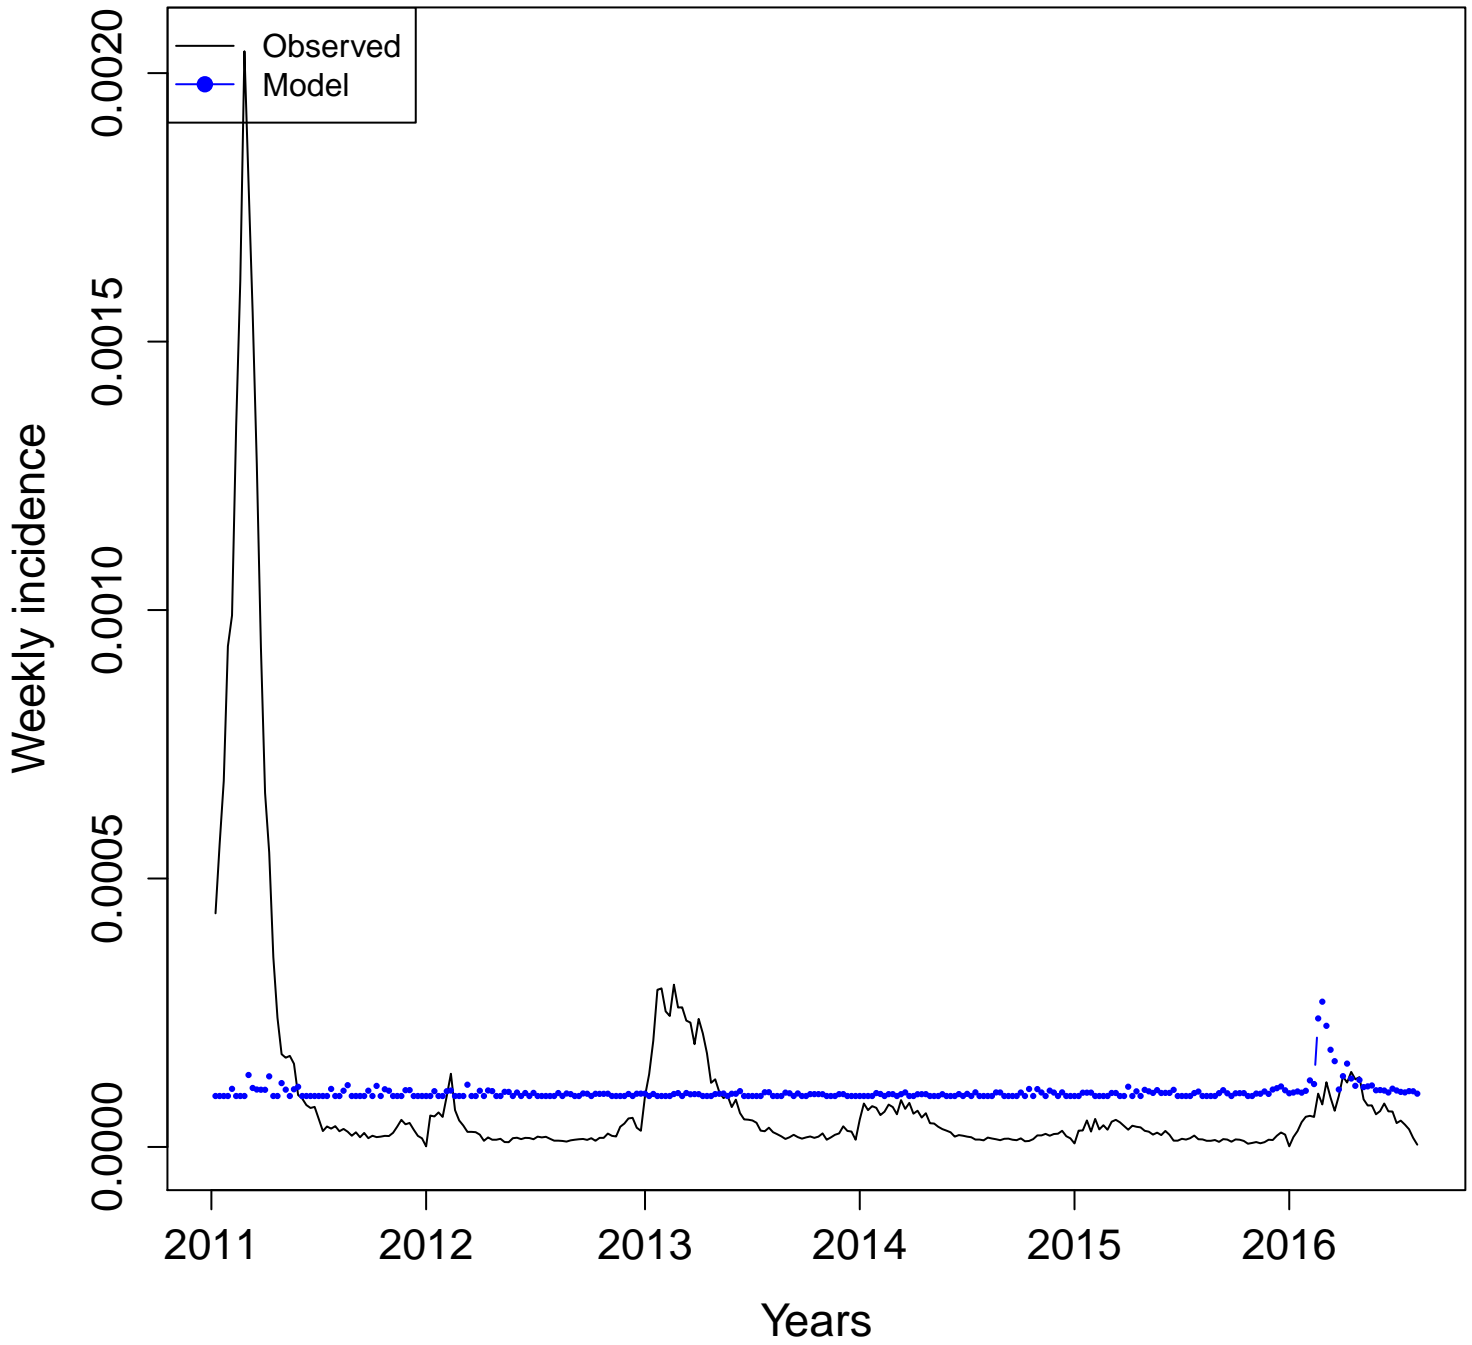

**AM- aedes**  
**Adj. R squared = 0.0104**

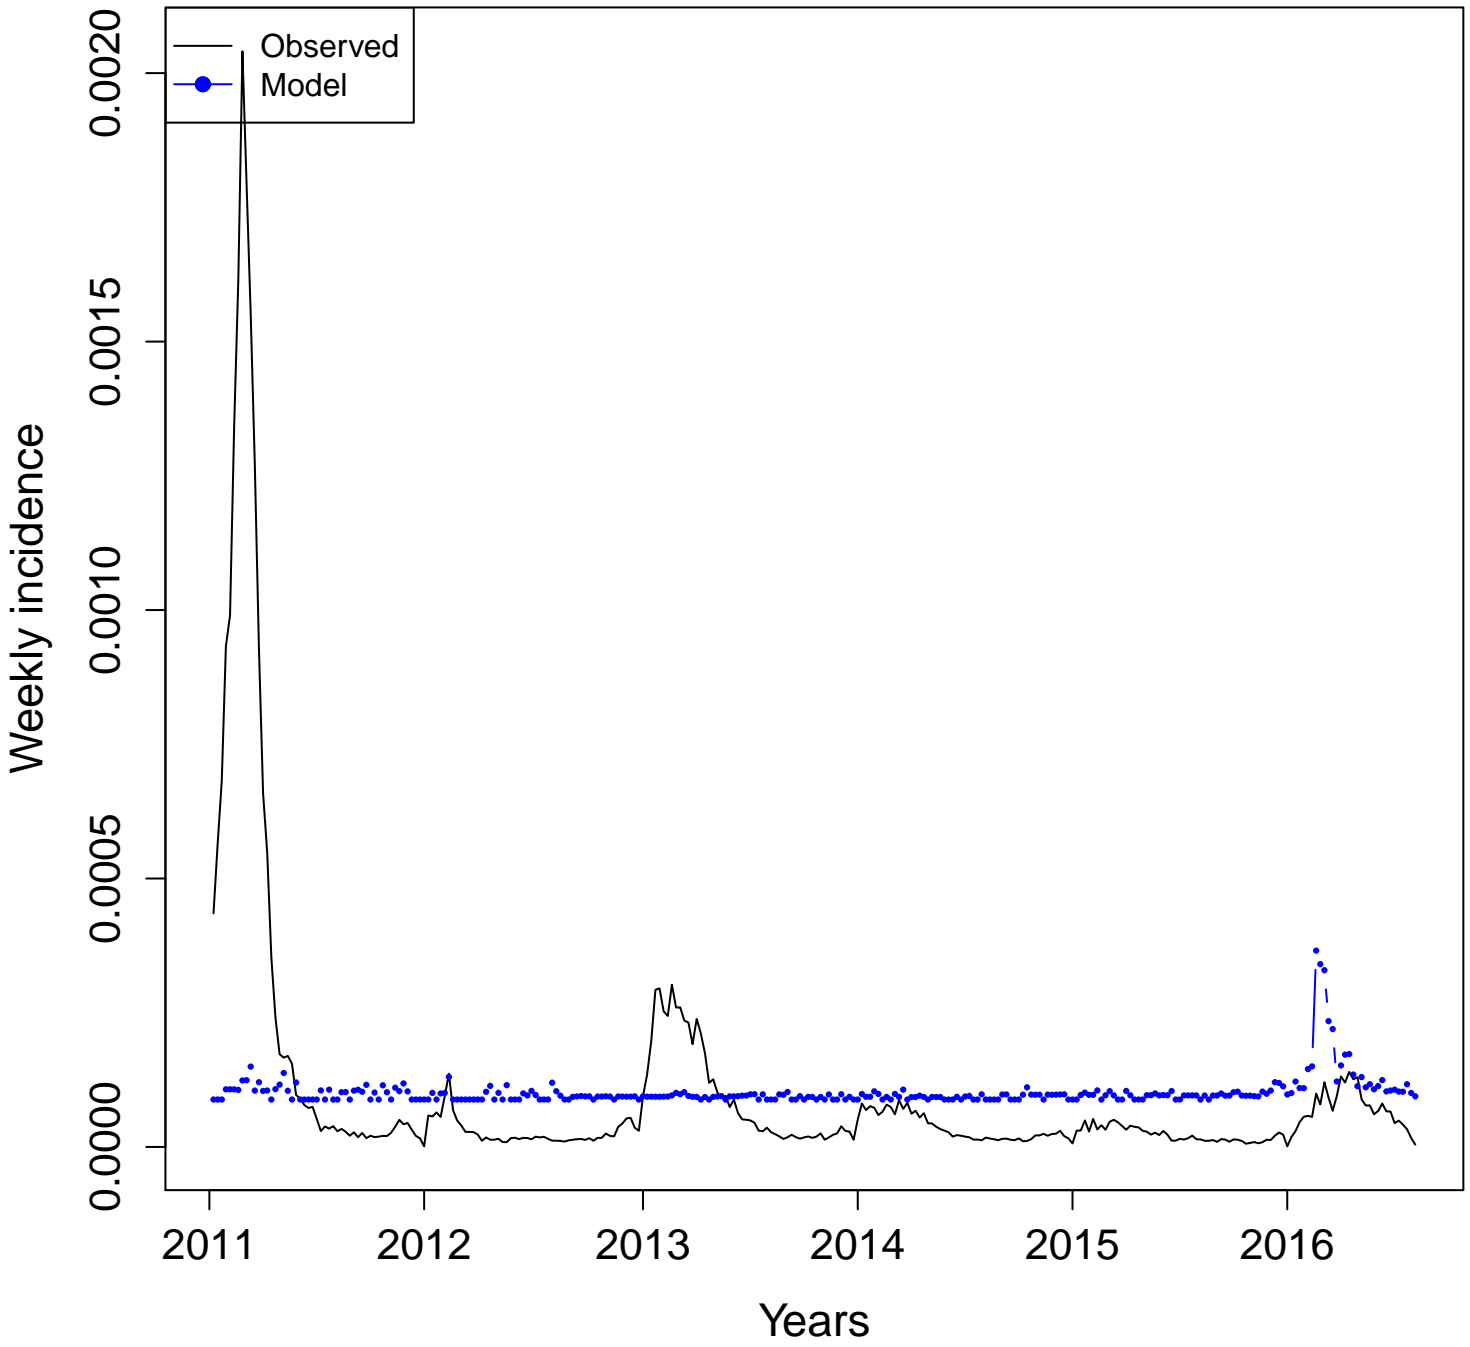

**AM- aegypti**  
**Adj. R squared = 0.0033**

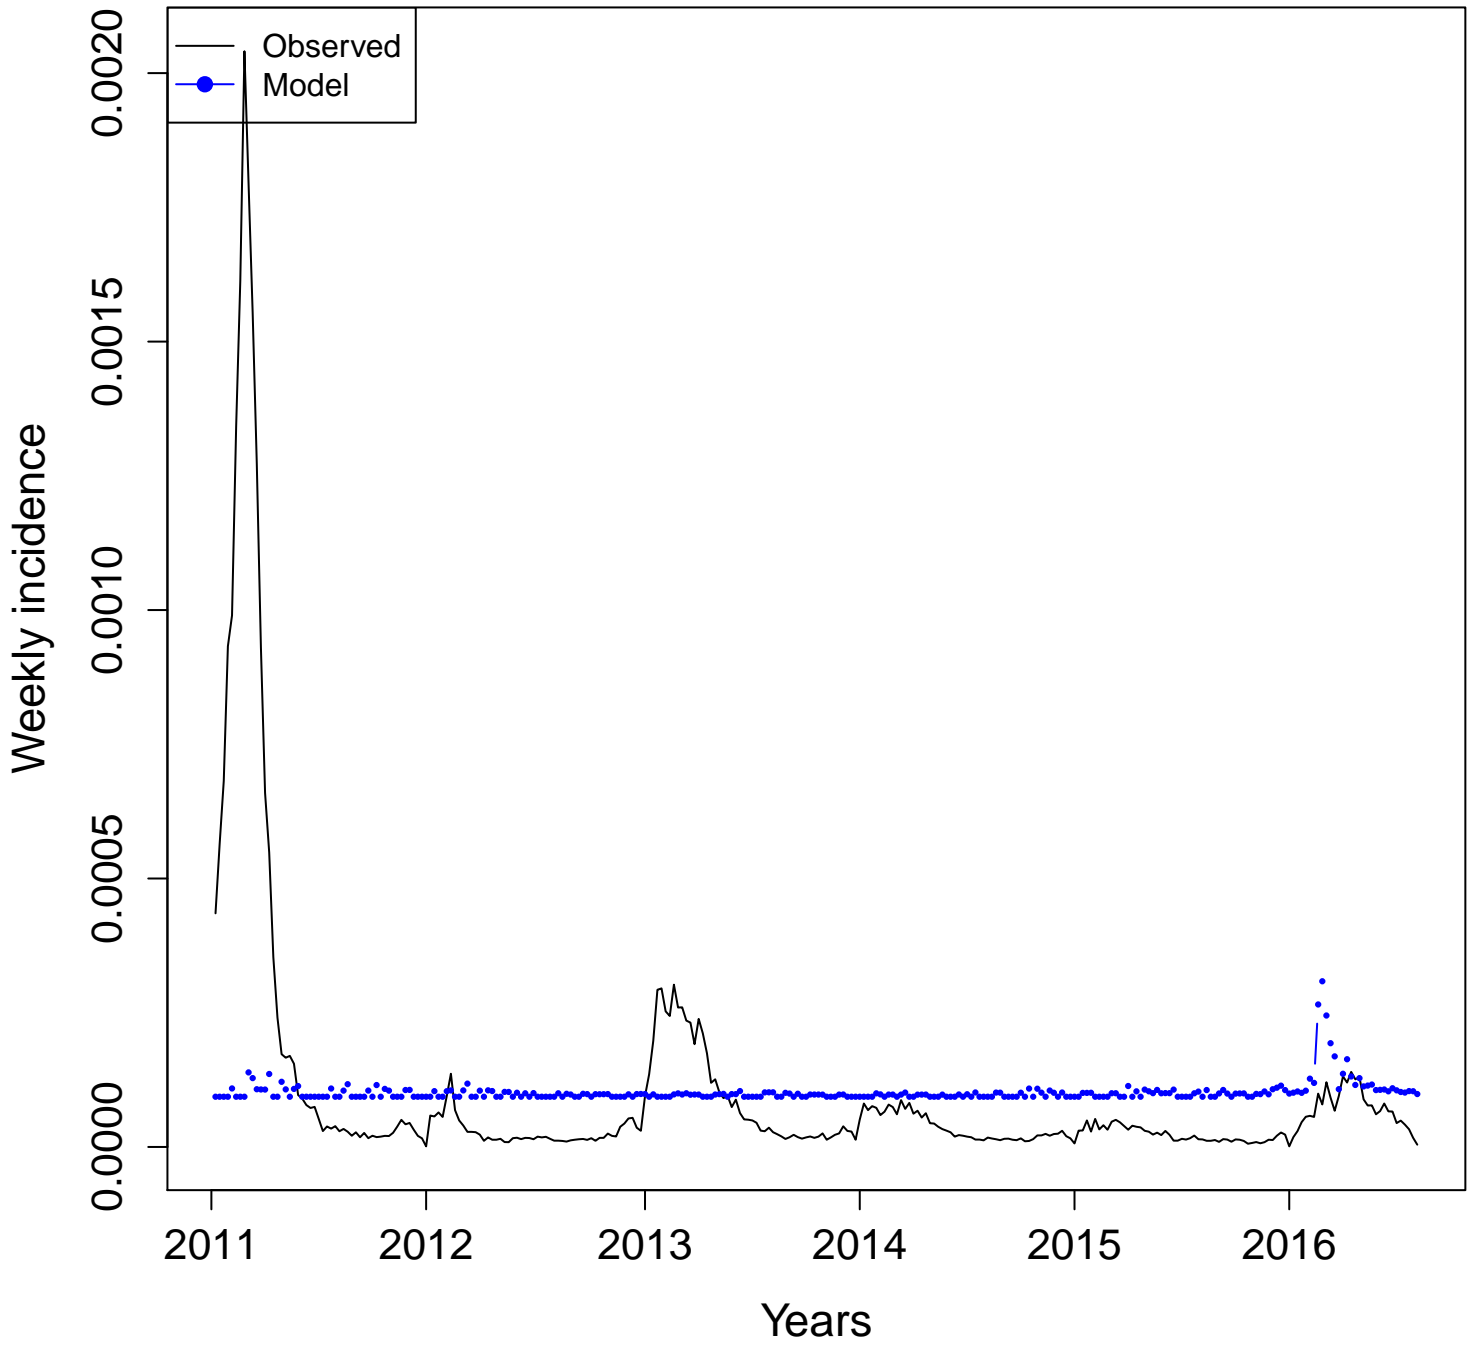

**AM- dengue**  
**Adj. R squared = 0.6458**

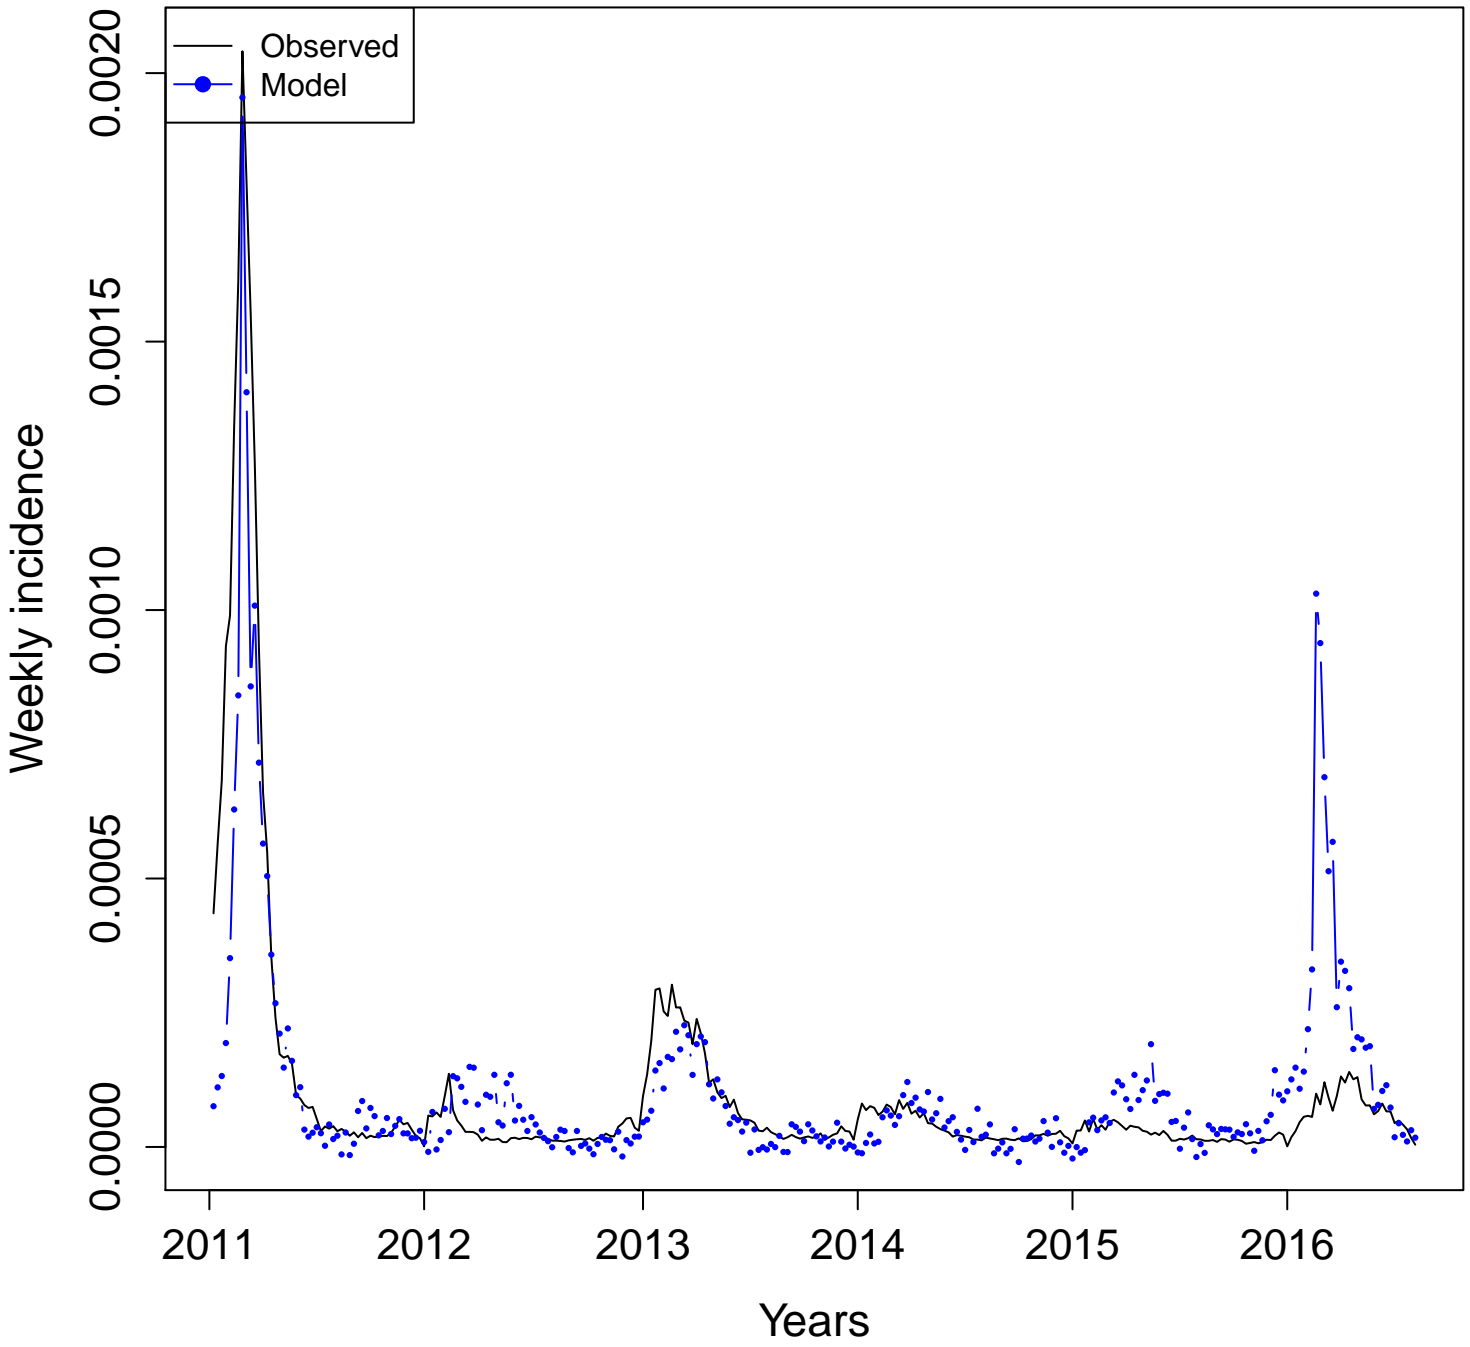

**AM- dengue.sintomas**  
**Adj. R squared = 0.5616**

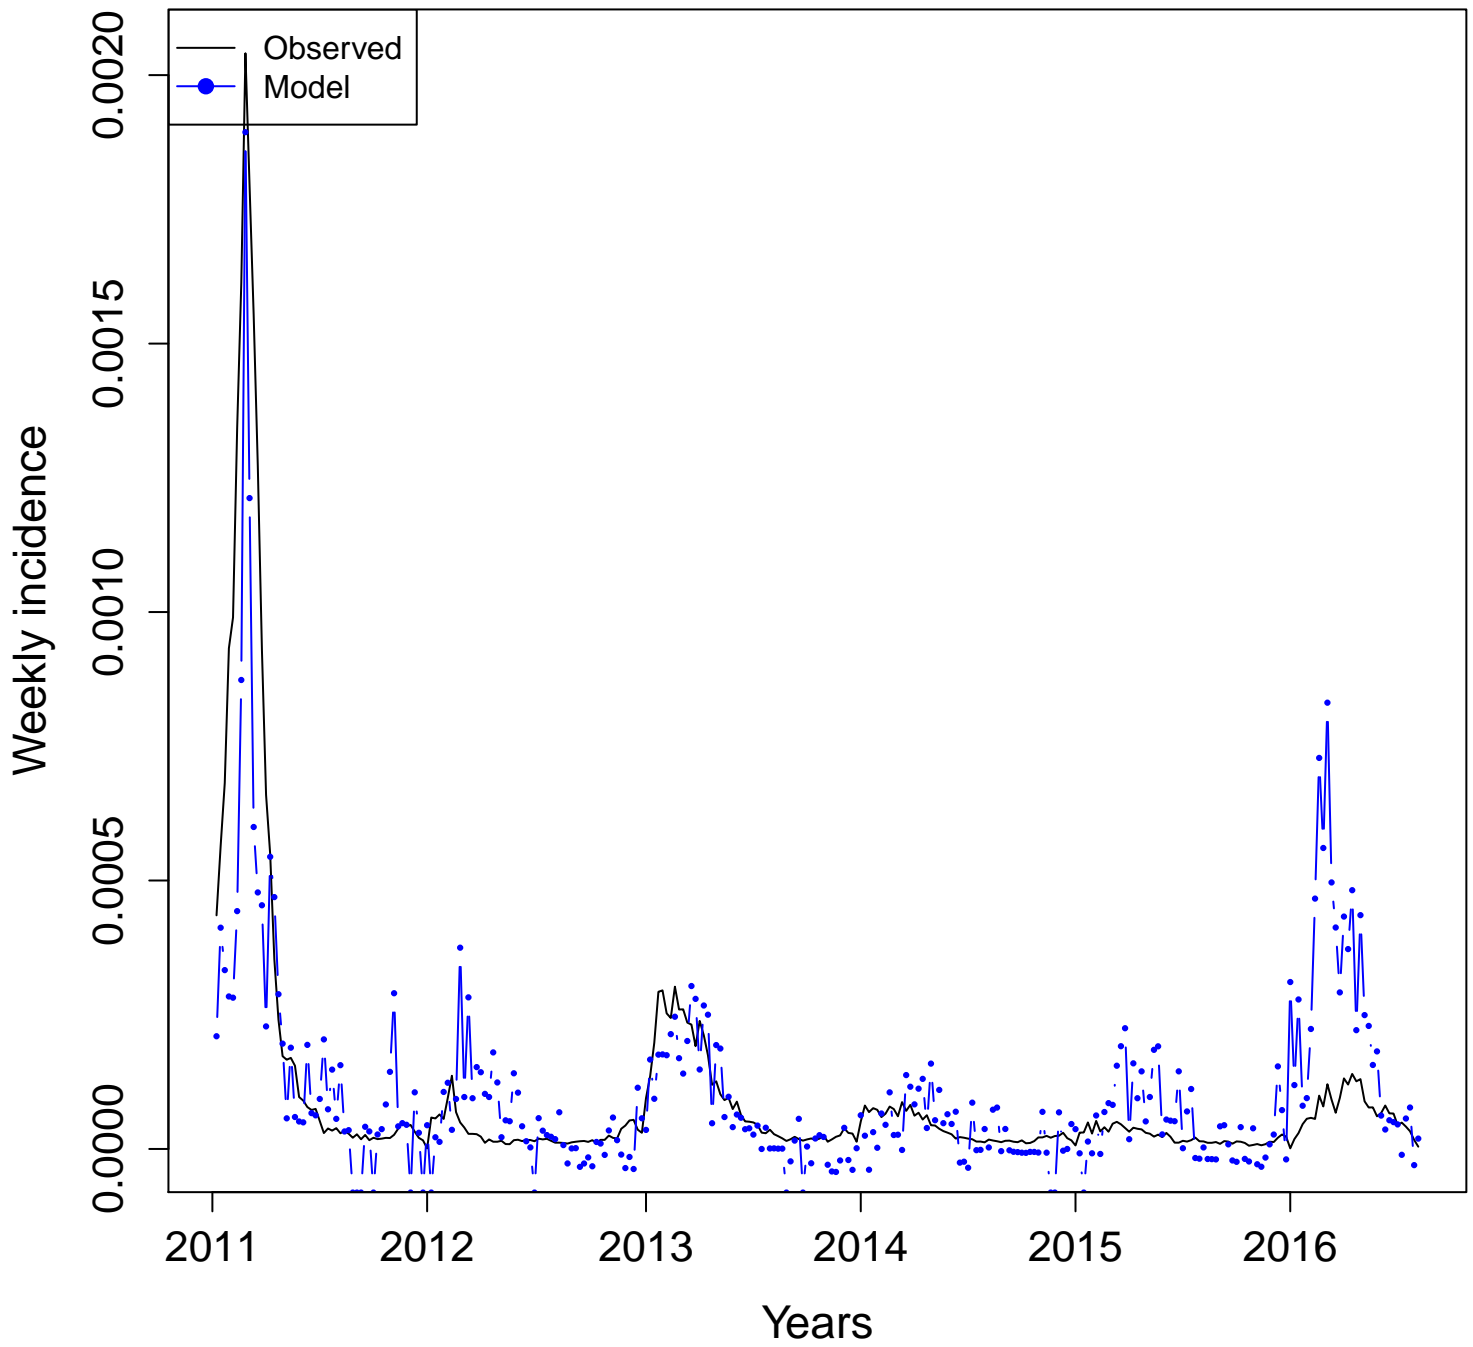



**AM- dengue.virus**  
**Adj. R squared = 0.0266**

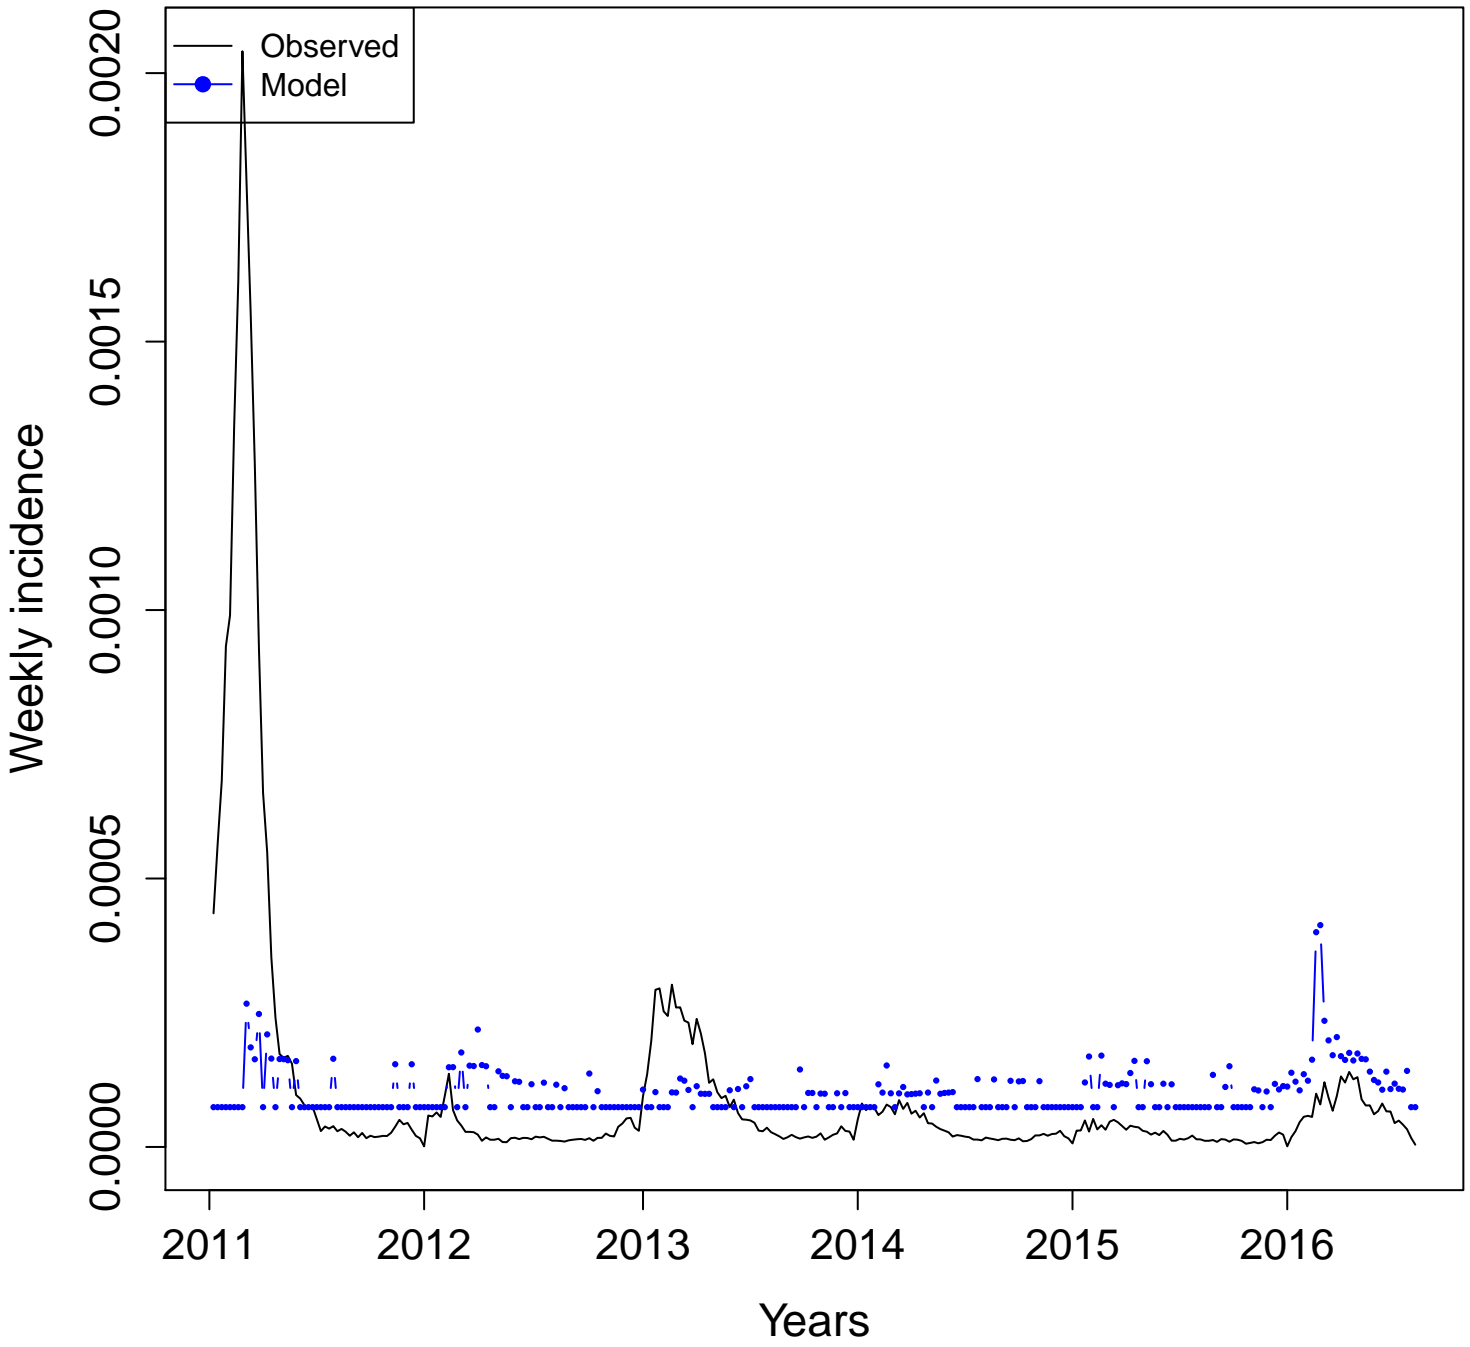

**AM- mosquito.dengue**  
**Adj. R squared = 0.2934**

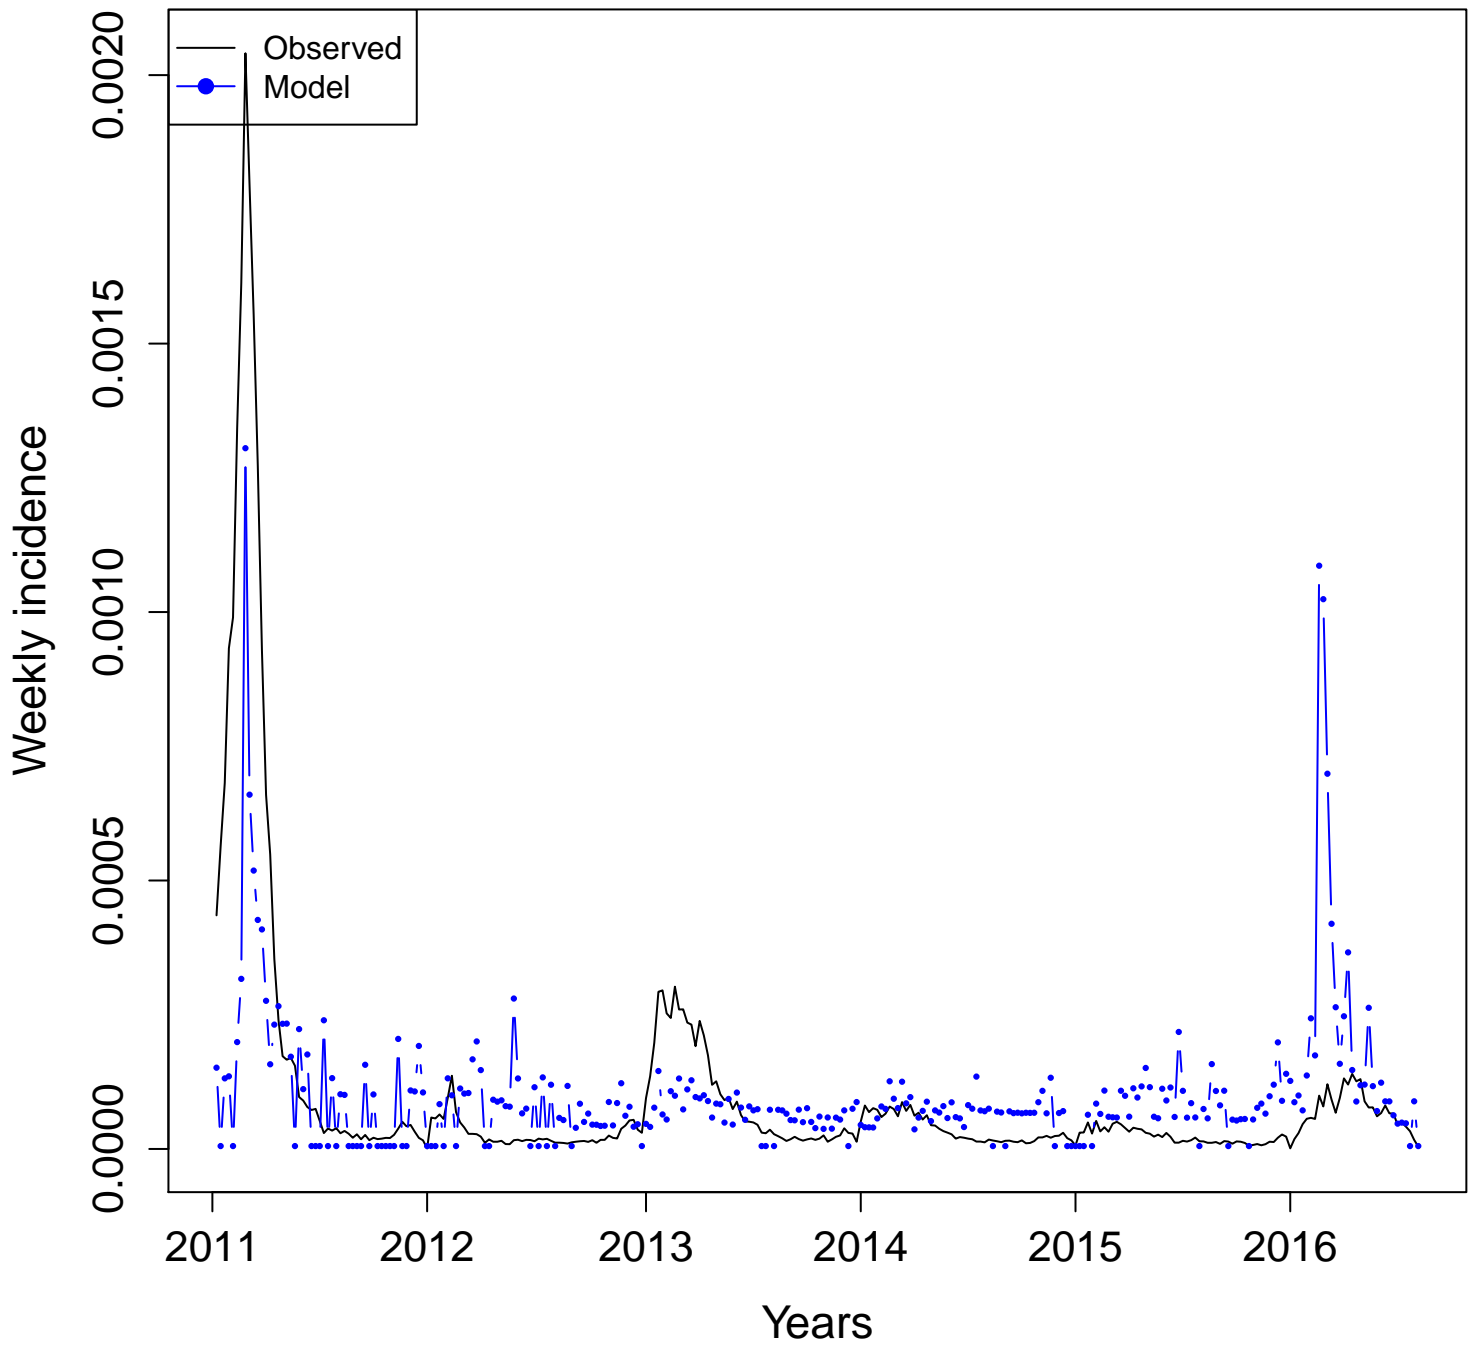

# AM- mosquito

Adj. R squared = 0.1024

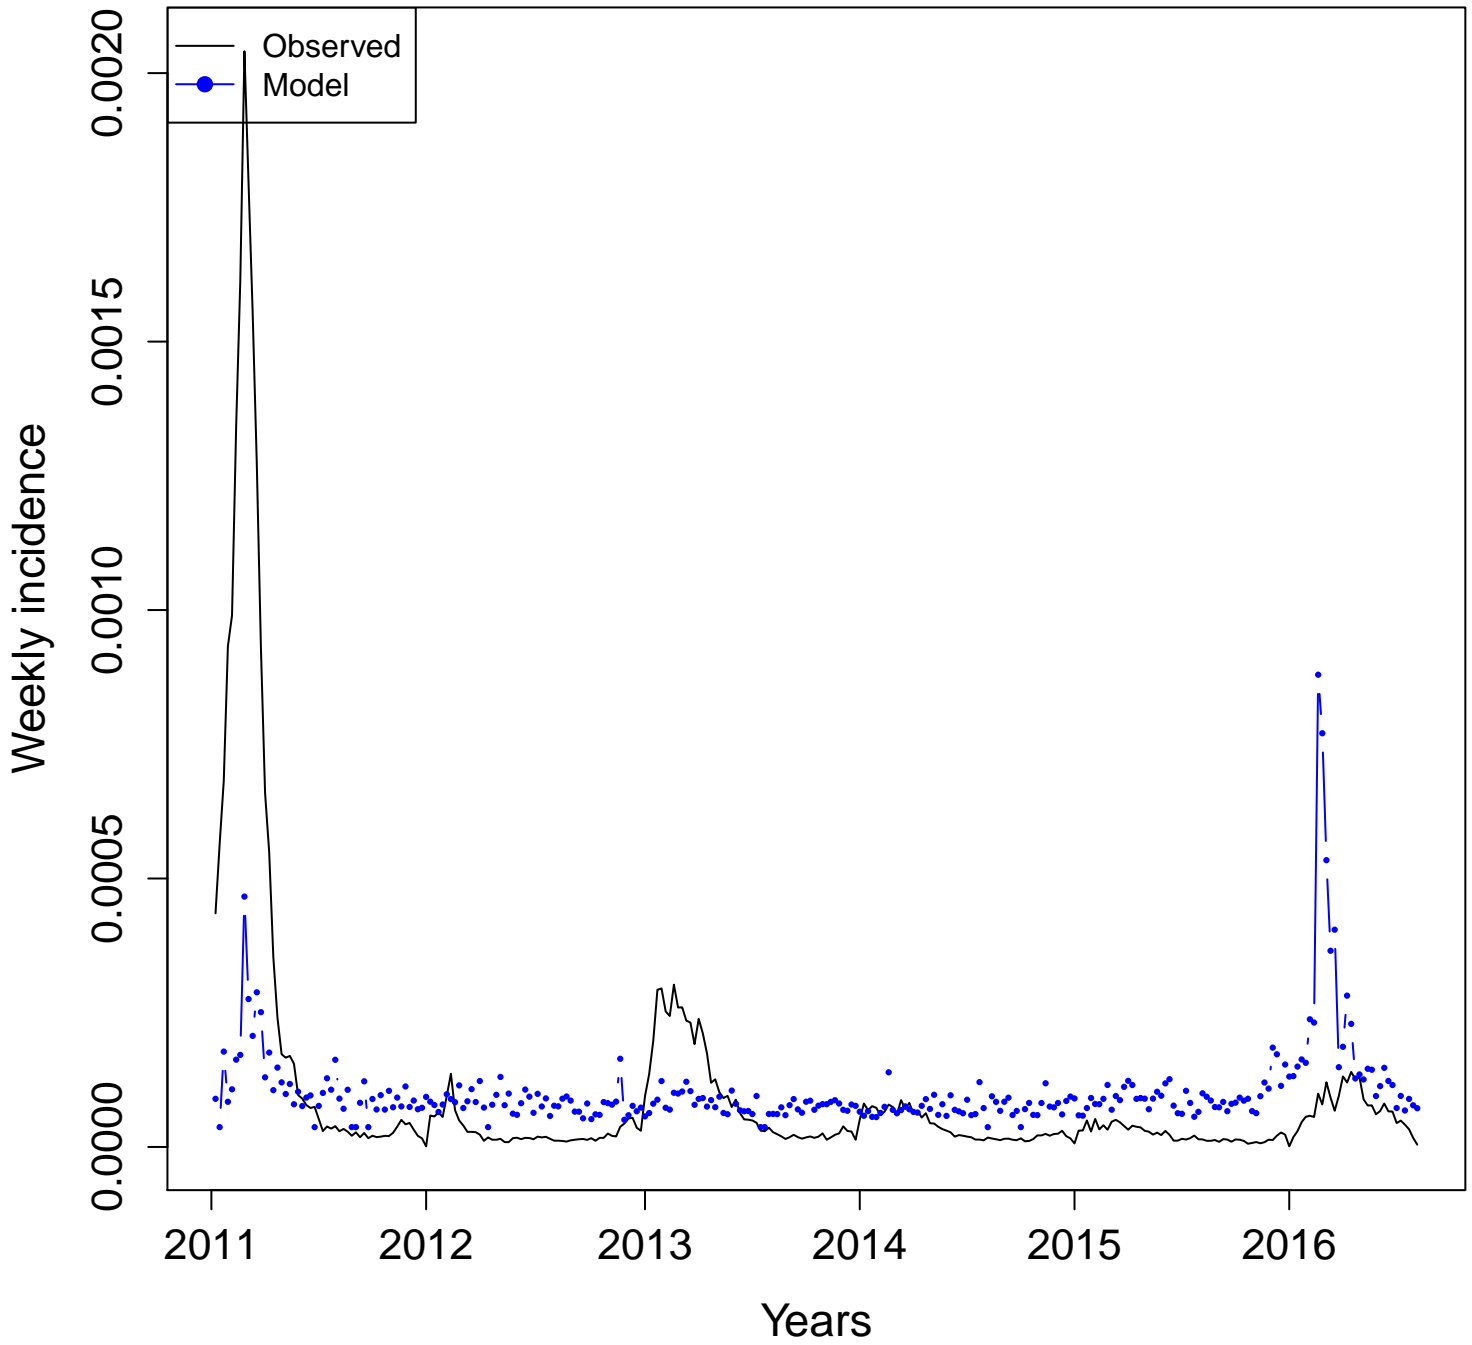

**AM- sintomas.da.dengue**  
**Adj. R squared = 0.5275**

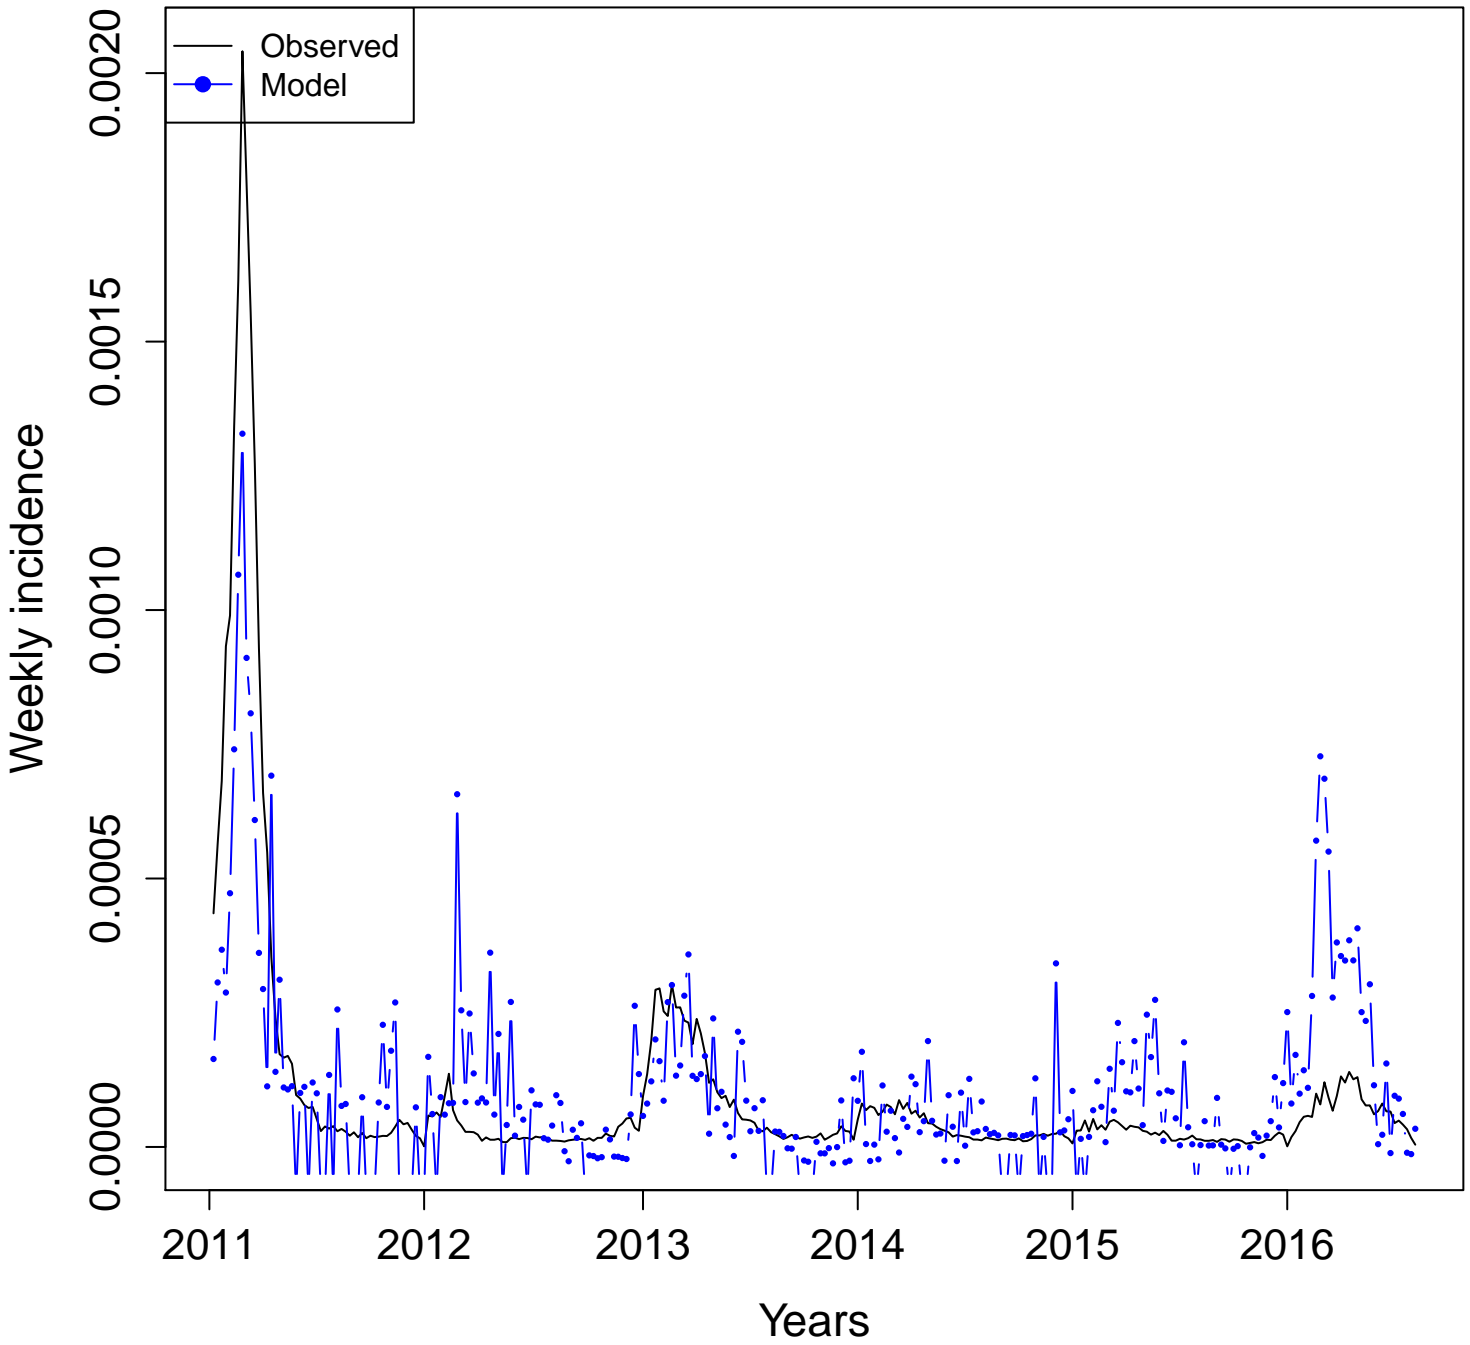

## Amapá (AP)

# Dengue incidence vs. Google Health Trends (2011–2016)

### Definitions:

- **Combined terms:**
  - **All:** model with all the available terms.  $n$  = number of terms
  - **Four:** model with "dengue", "dengue sintomas", "aedes", and "mosquito".
  - **Uncorrelated:** model with non-correlated terms.  $n$  = number of uncorrelated terms
- **Individual terms:** Plots developed with one term at a time.
- Terms for all and uncorrelated models can be found in additional file 3.

**Combined terms**  
**Adjusted R squared**

**Amapá (AP)**

All  
(n = 7)

BR-AP  
Adj. R squared = 0.0957

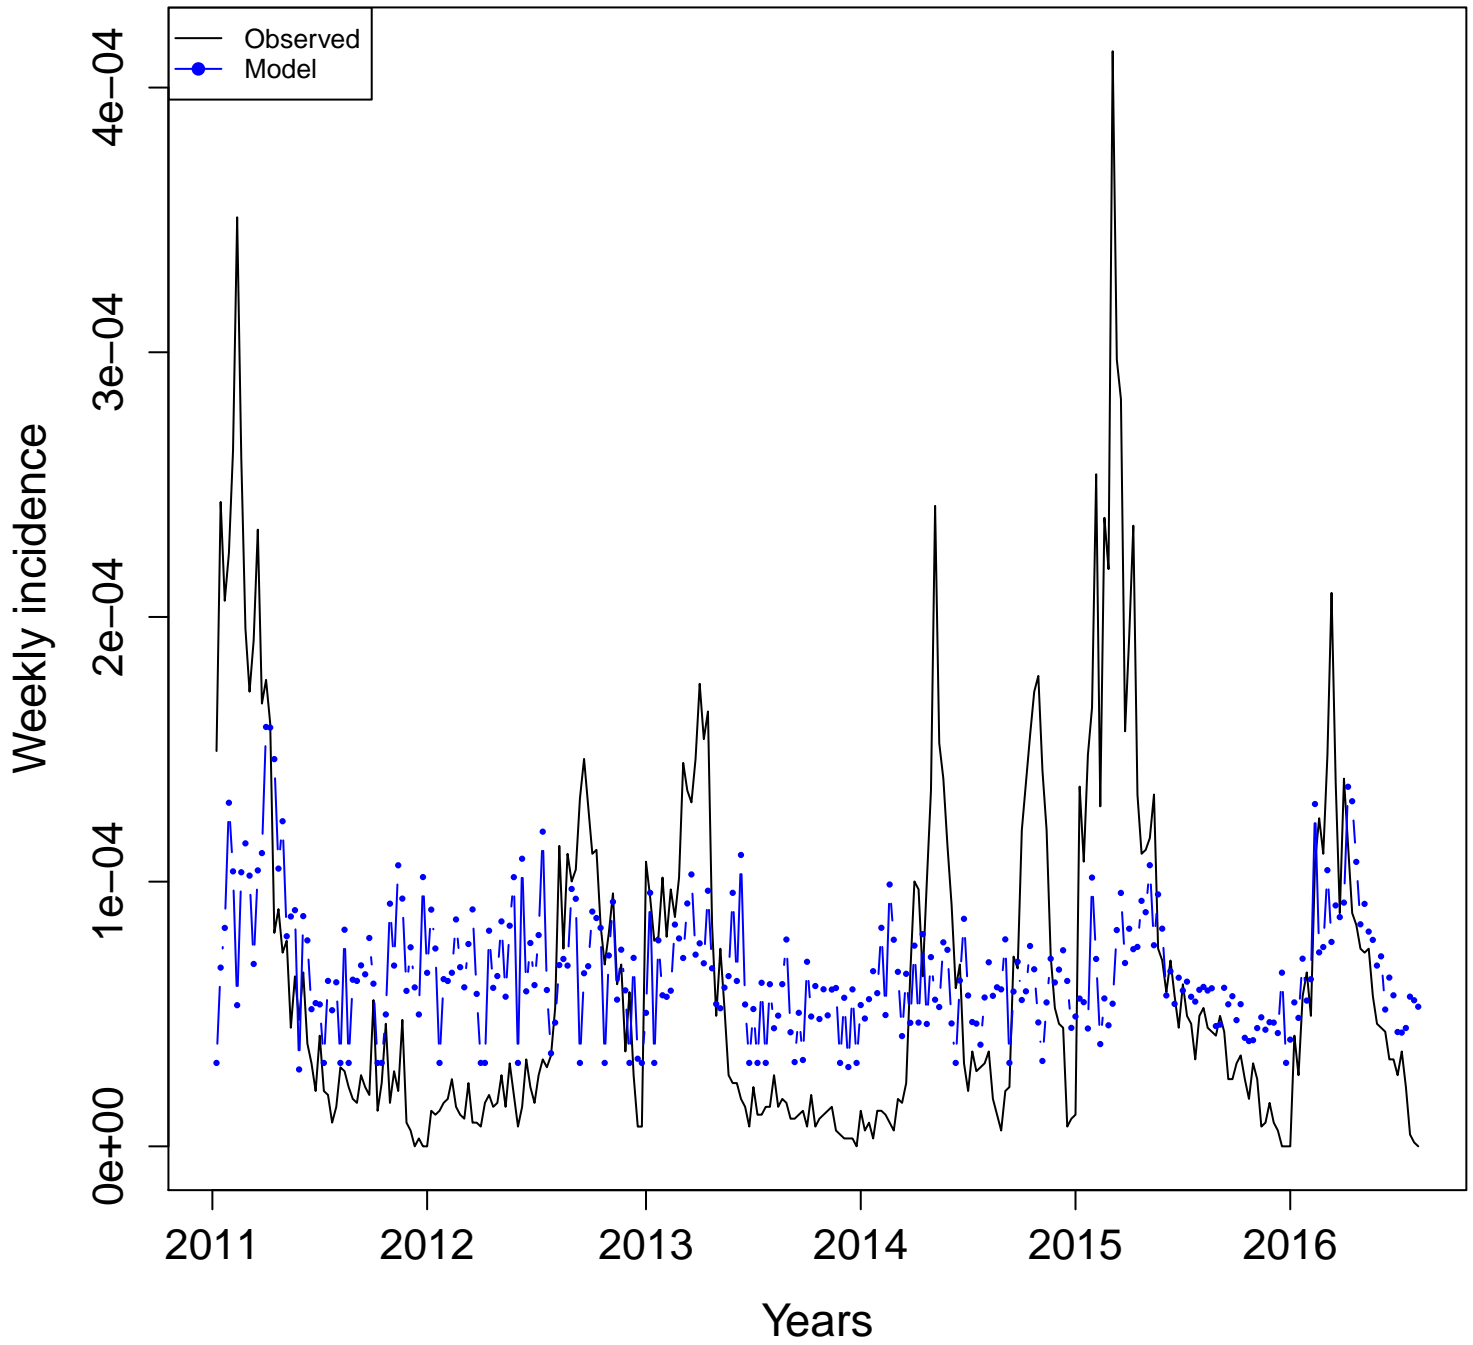

**BR-AP**  
**Adj. R squared = 0.1032**

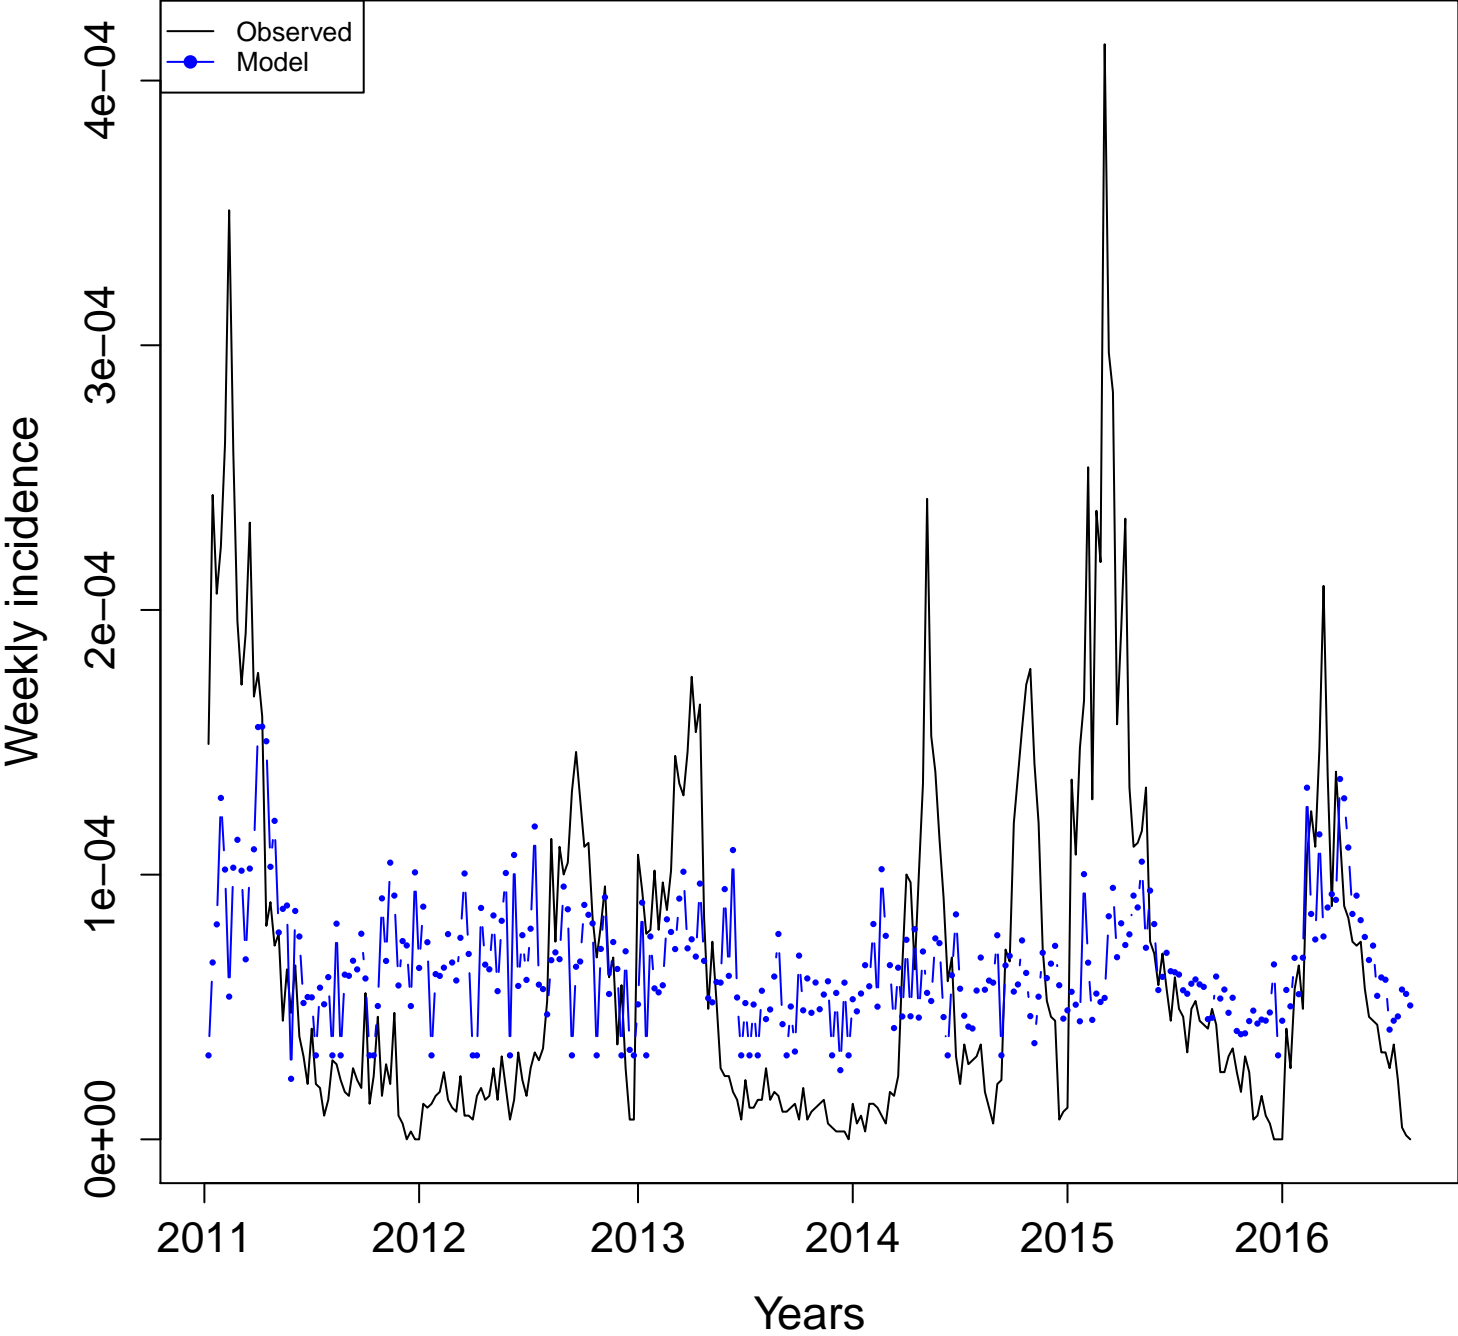



**Uncorrelated  
(n = 6)**

**BR-AP  
Adj. R squared = 0.0988**

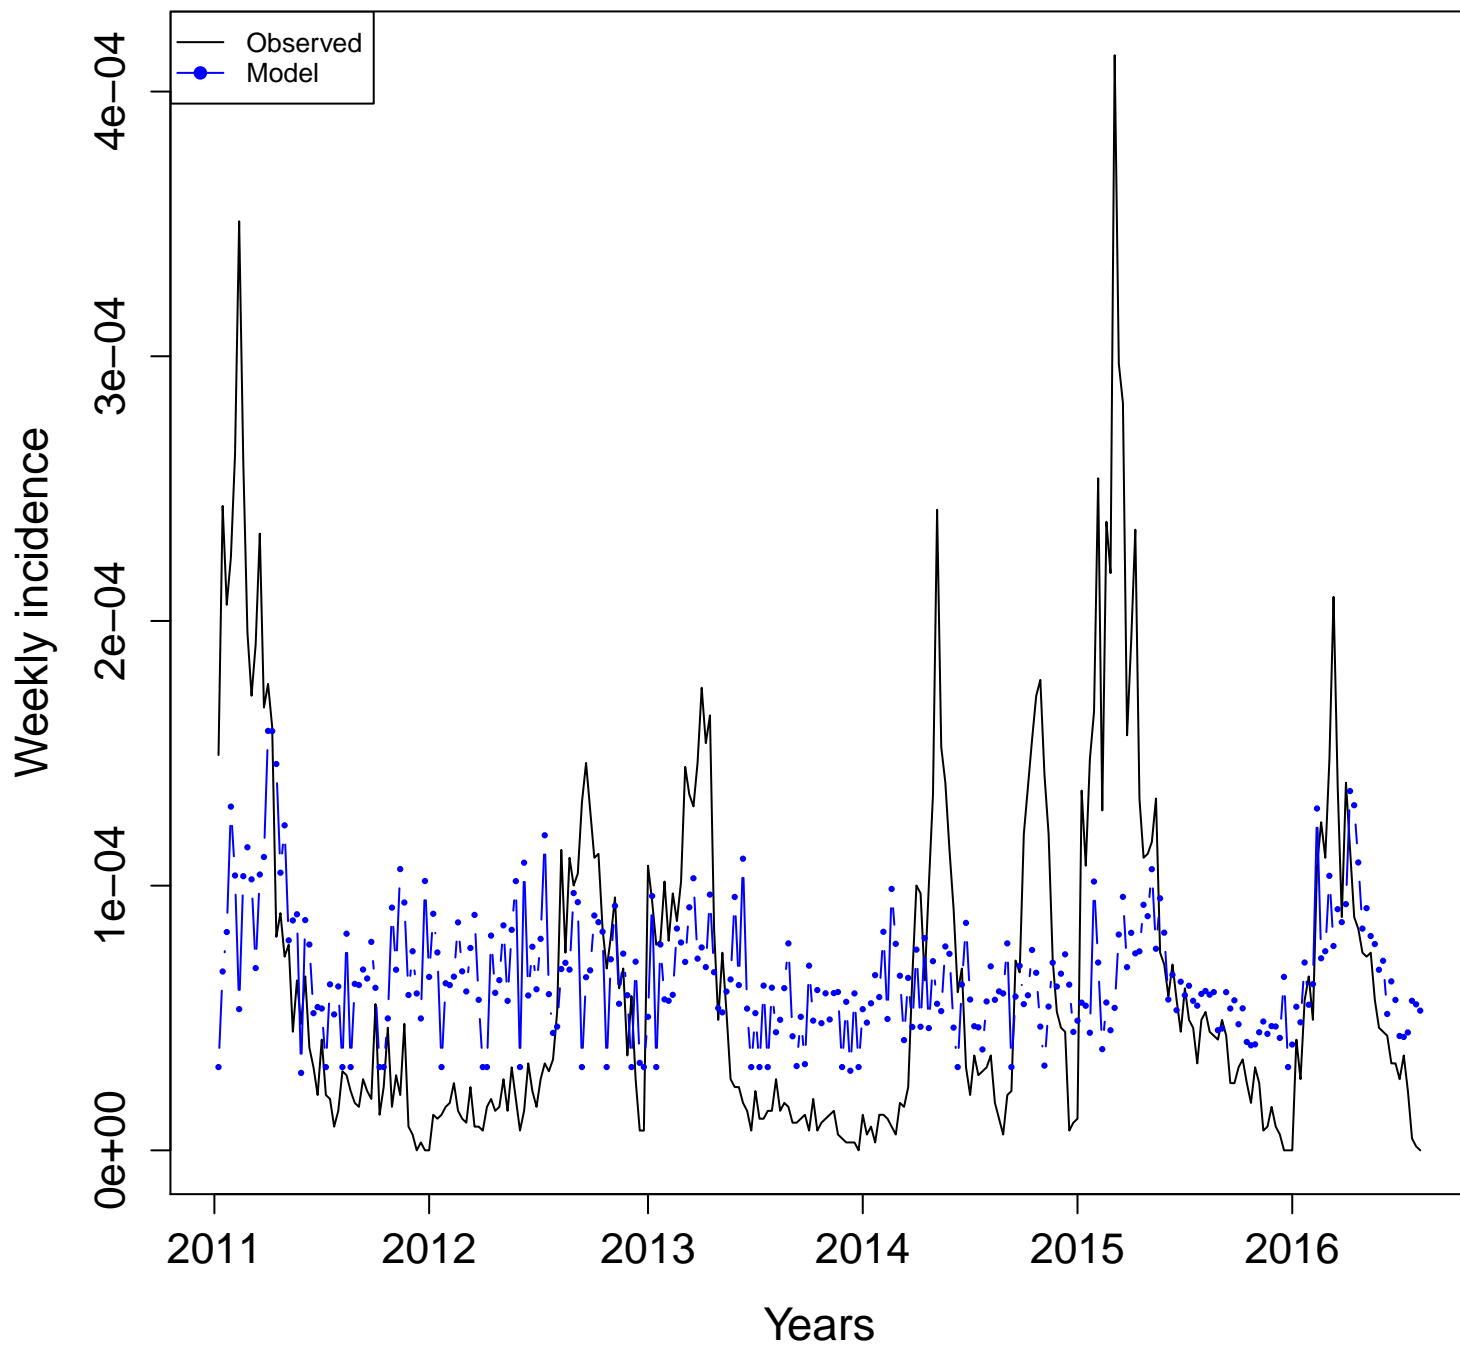

**Individual terms**  
**Adjusted R squared**

**Amapá (AP)**

**AP- aedes.aegypti**  
**Adj. R squared =  $-9e-04$**

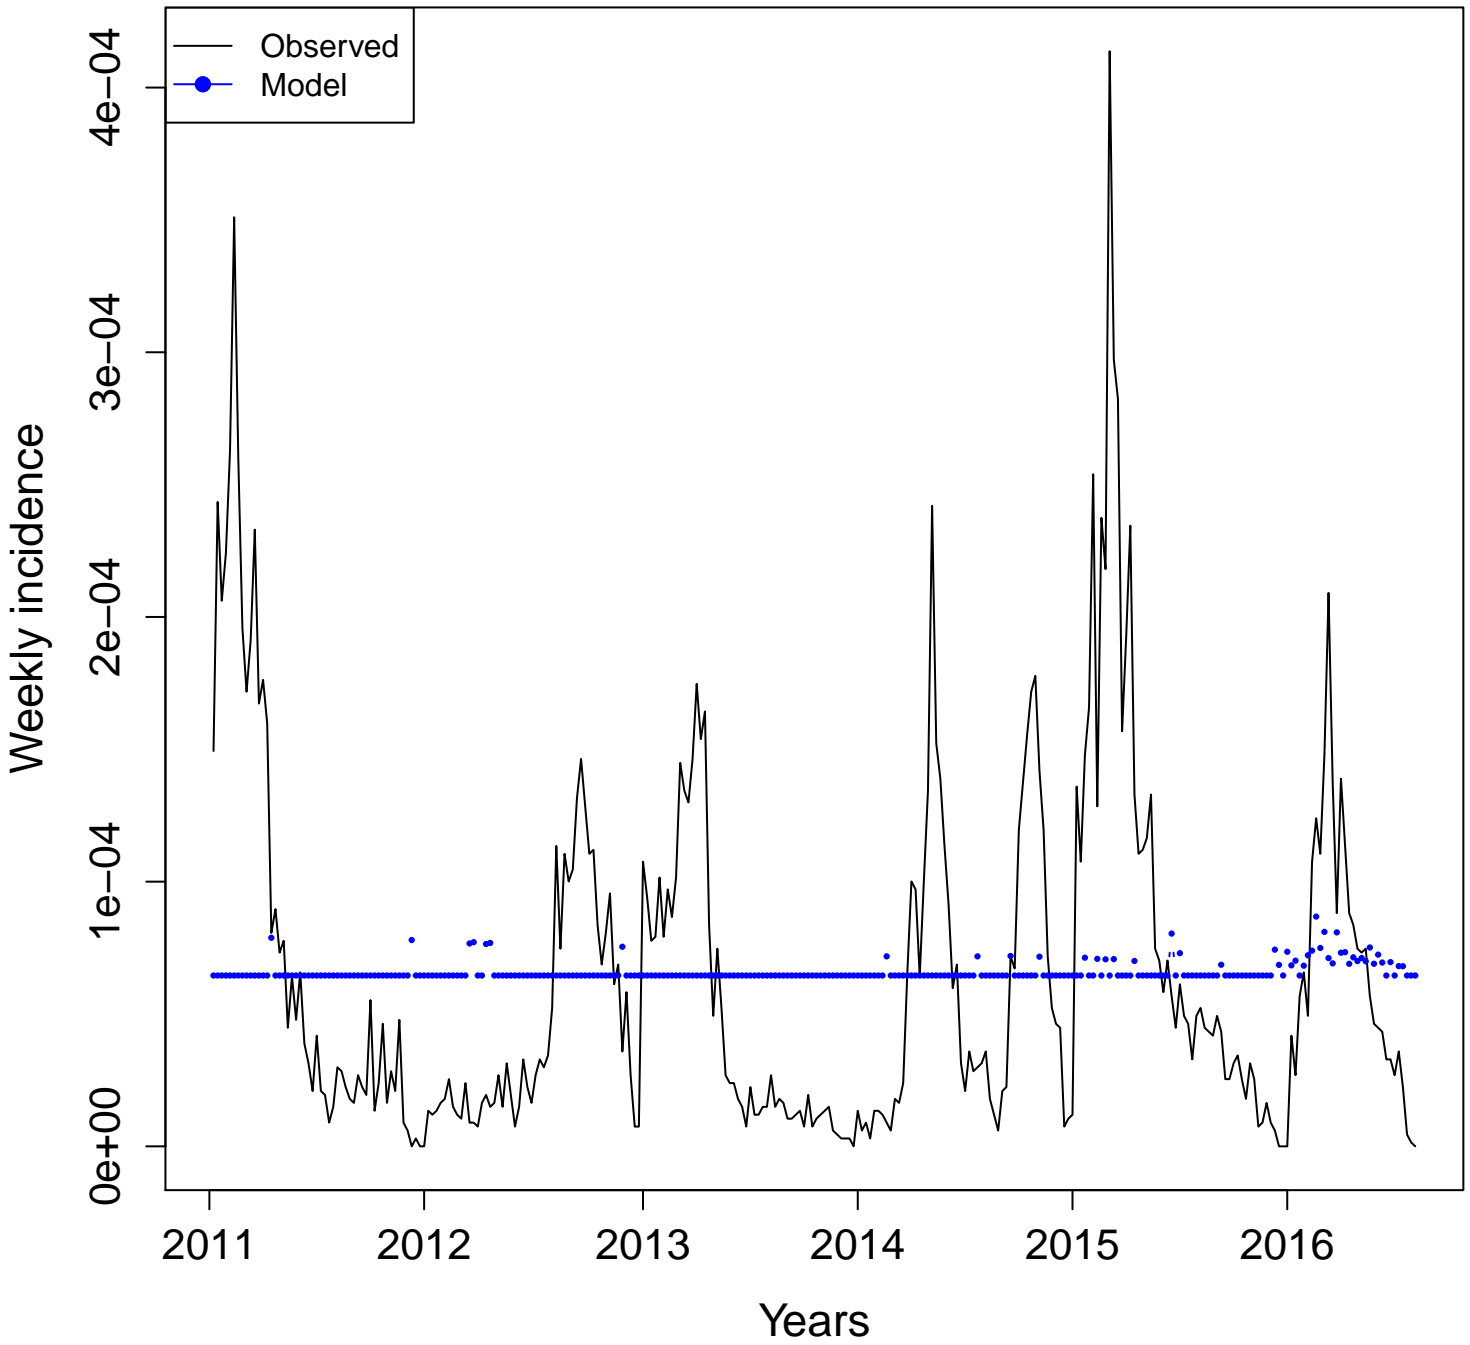

**AP- aedes**  
**Adj. R squared =  $-3e-04$**

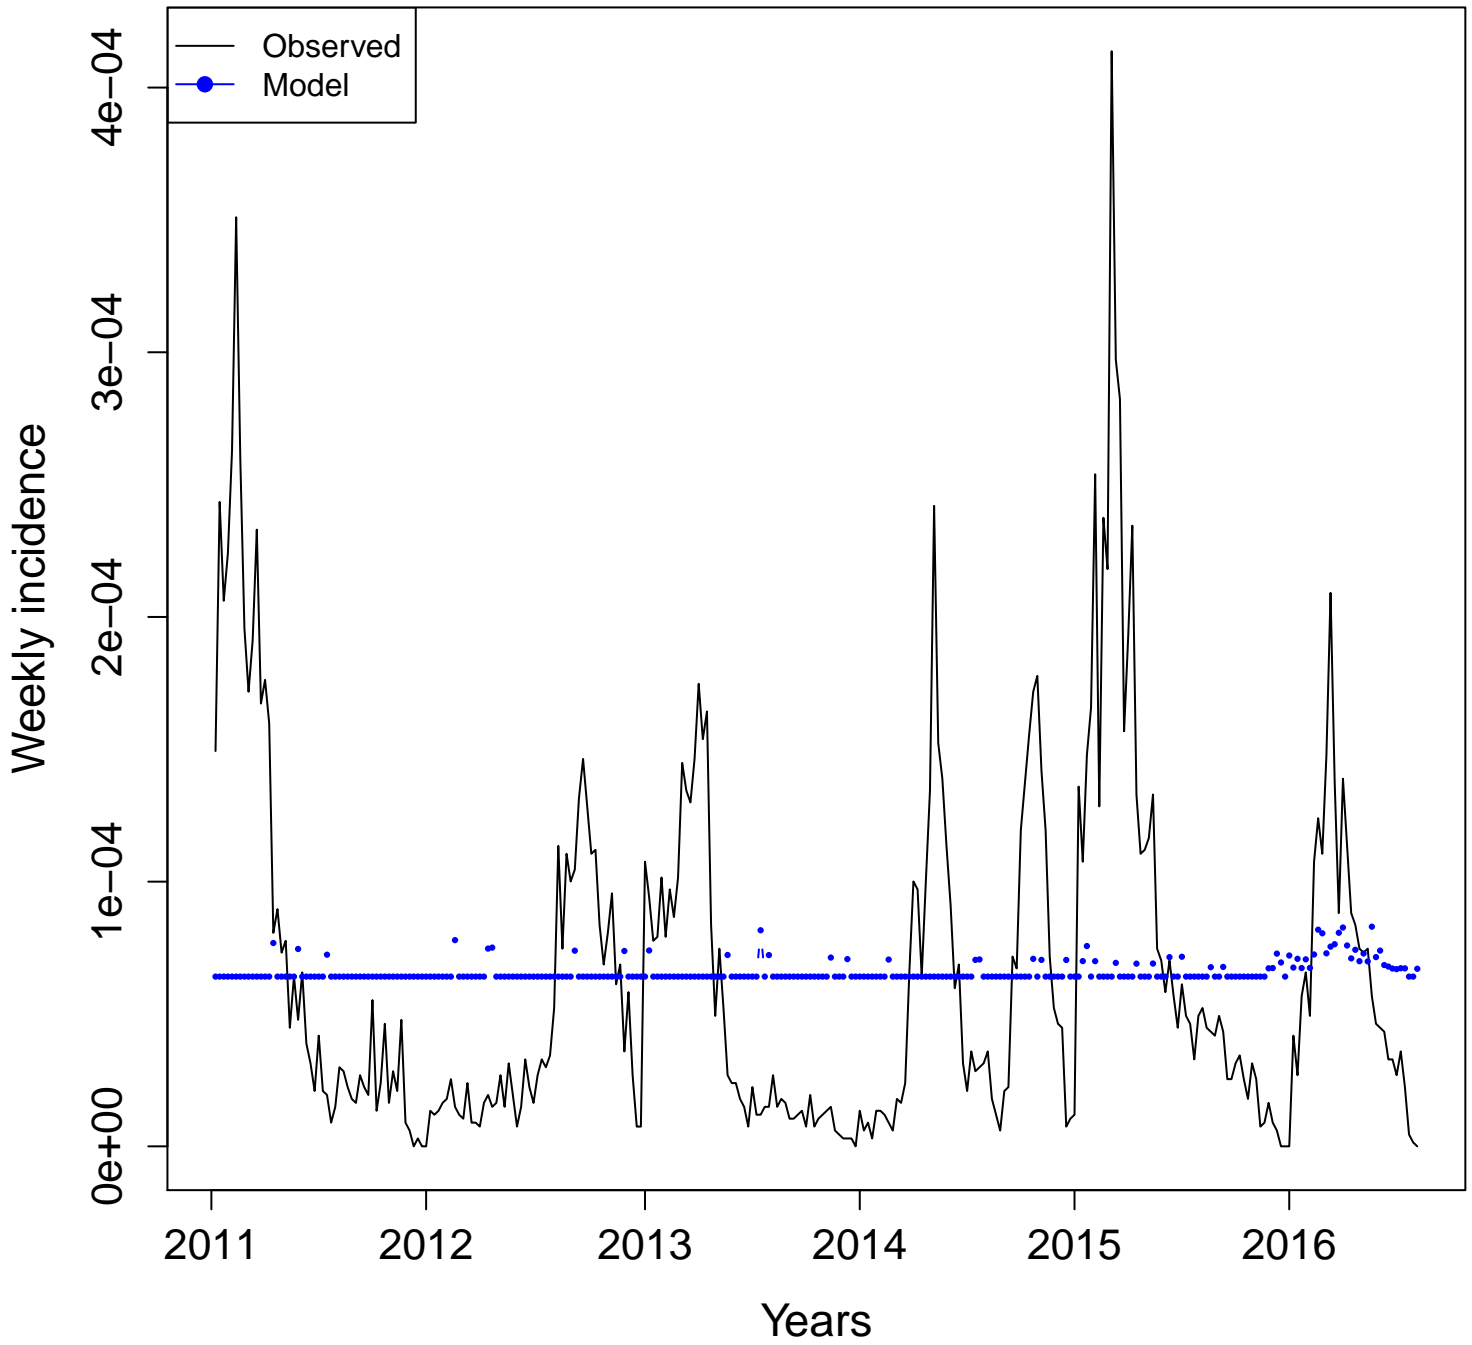

**AP- aegypti**  
**Adj. R squared = -0.0013**

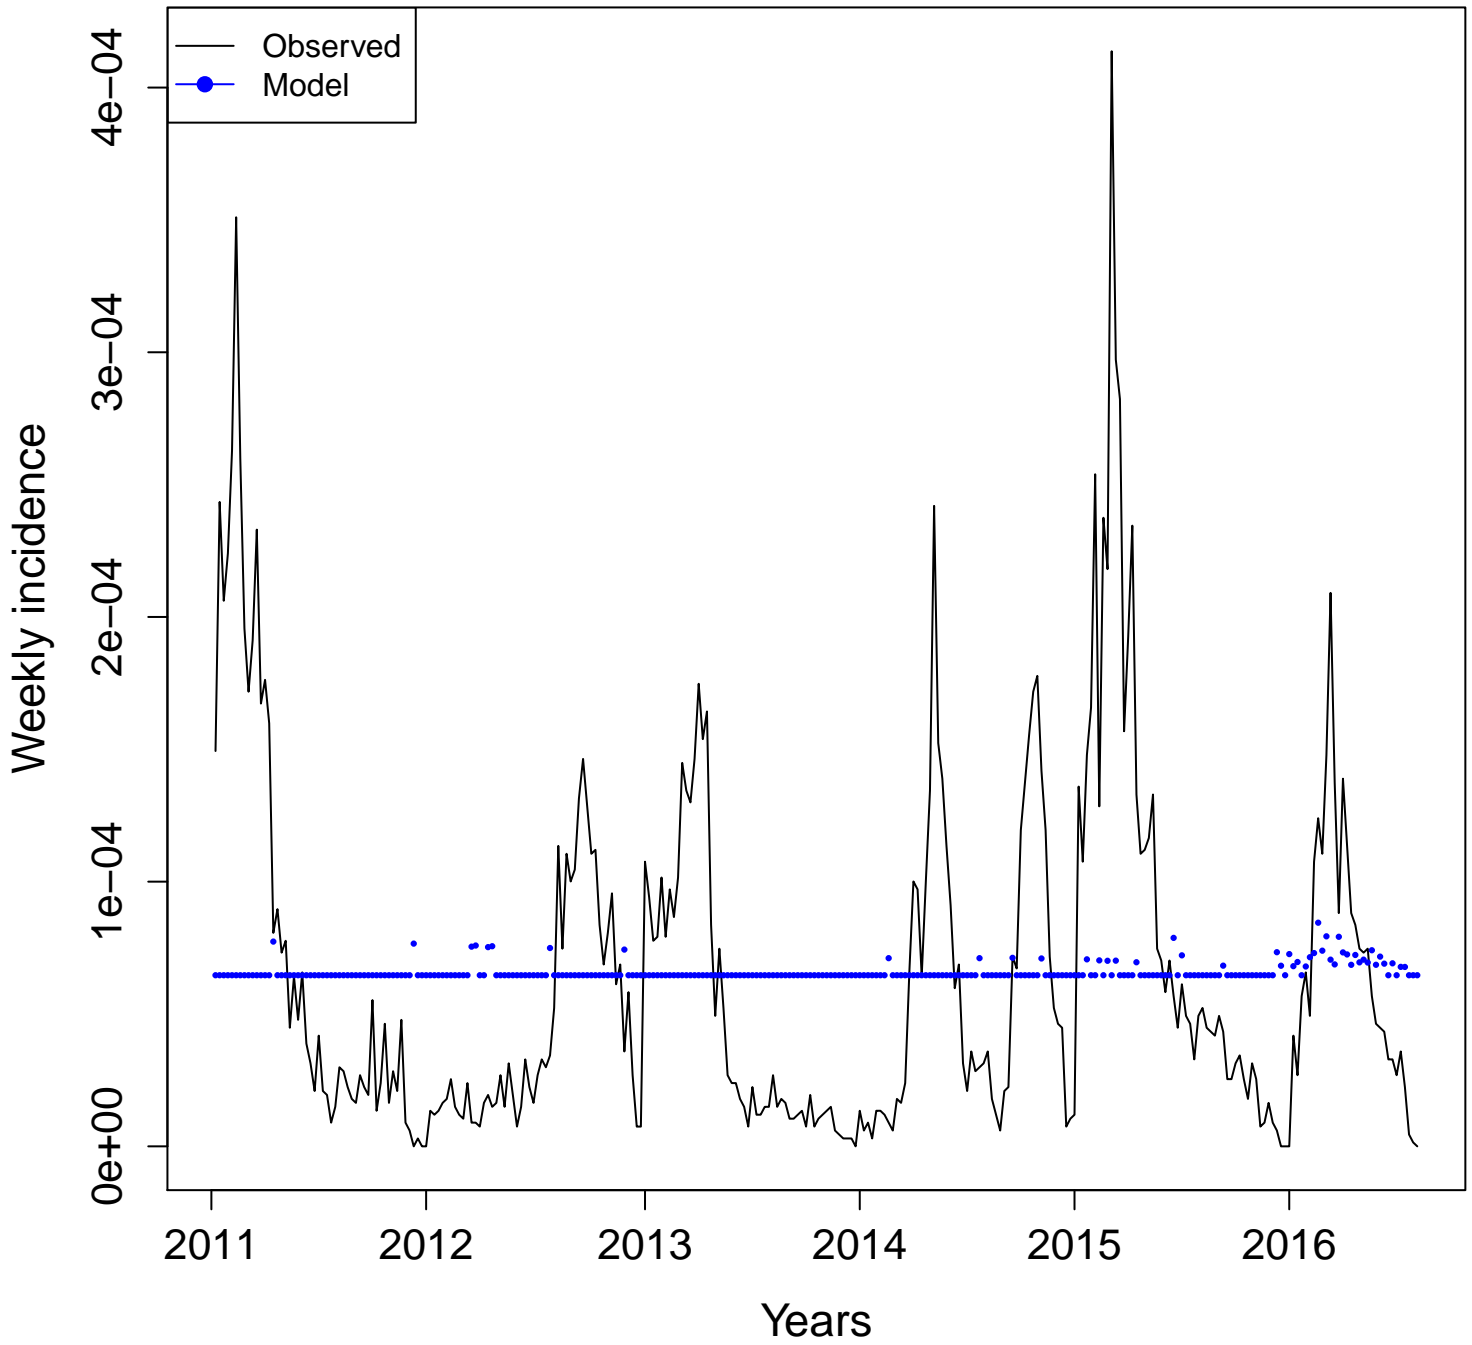

# AP- dengue

Adj. R squared = 0.0999

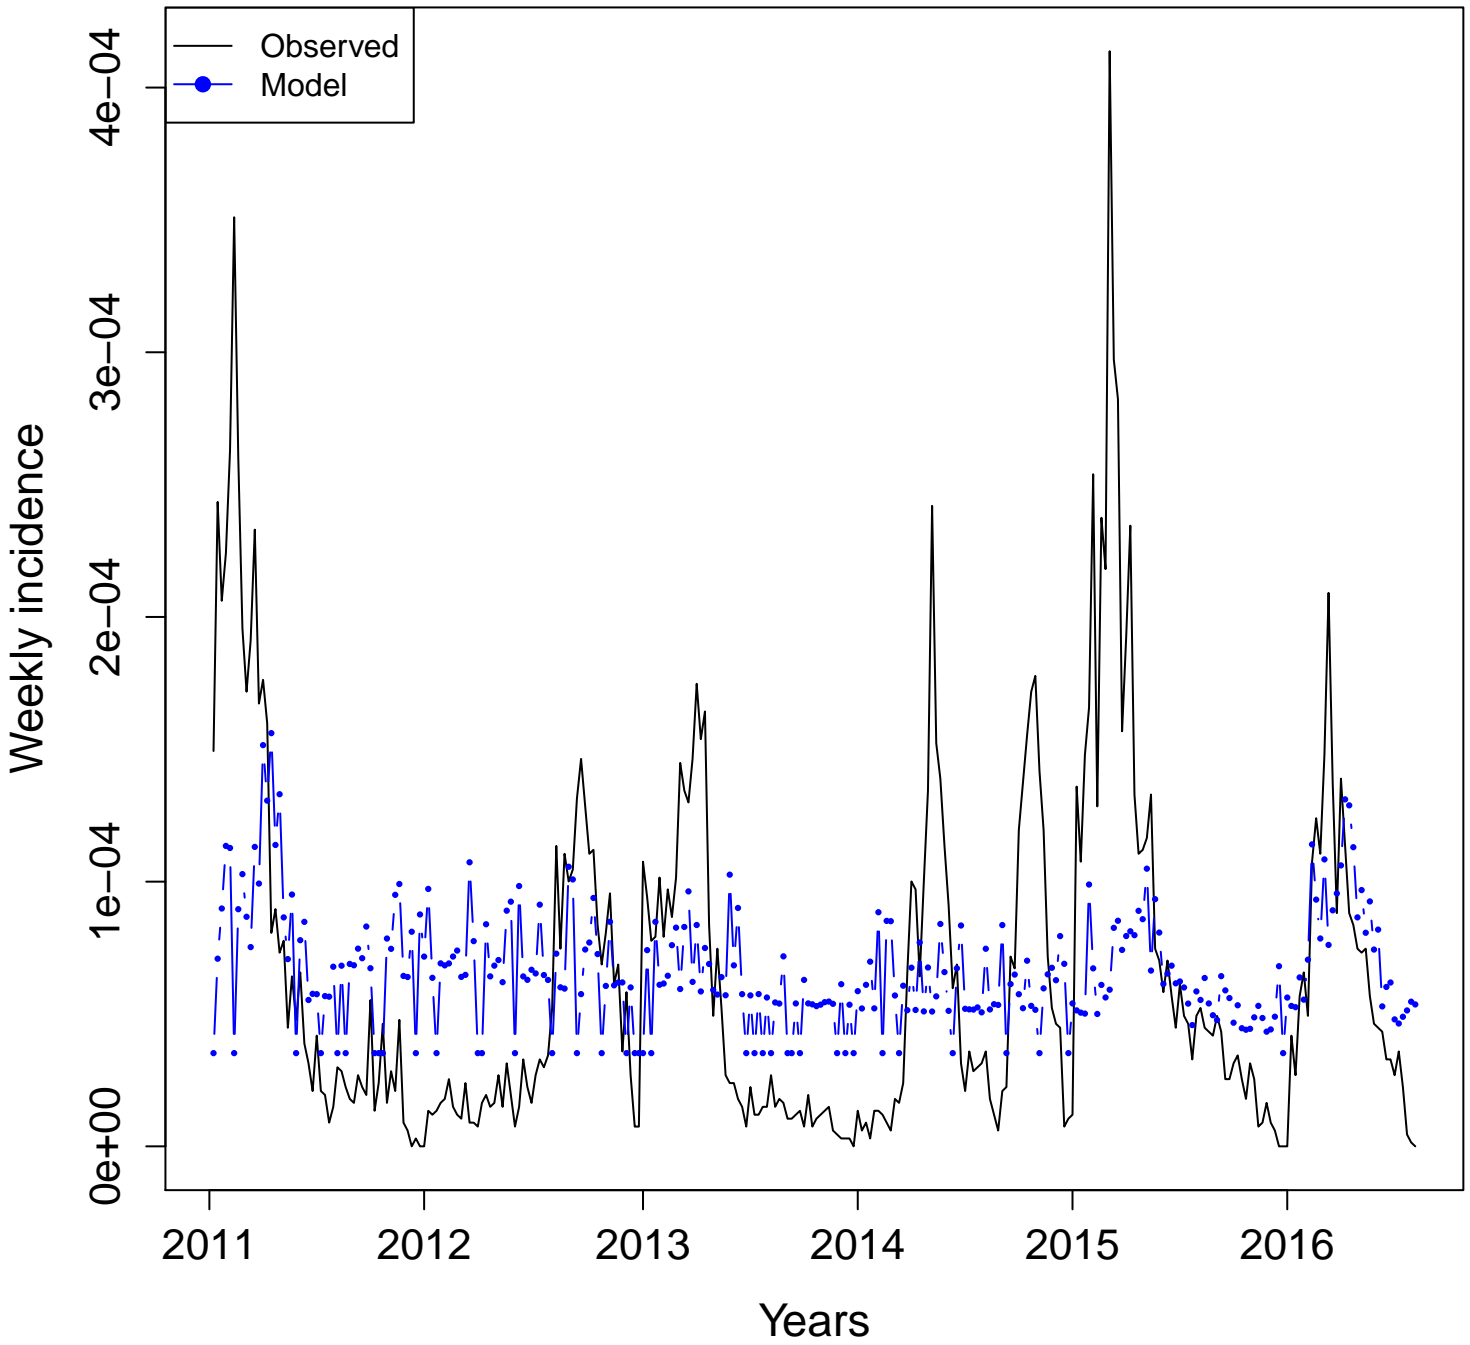

**AP- dengue.sintomas**  
**Adj. R squared = 0.004**

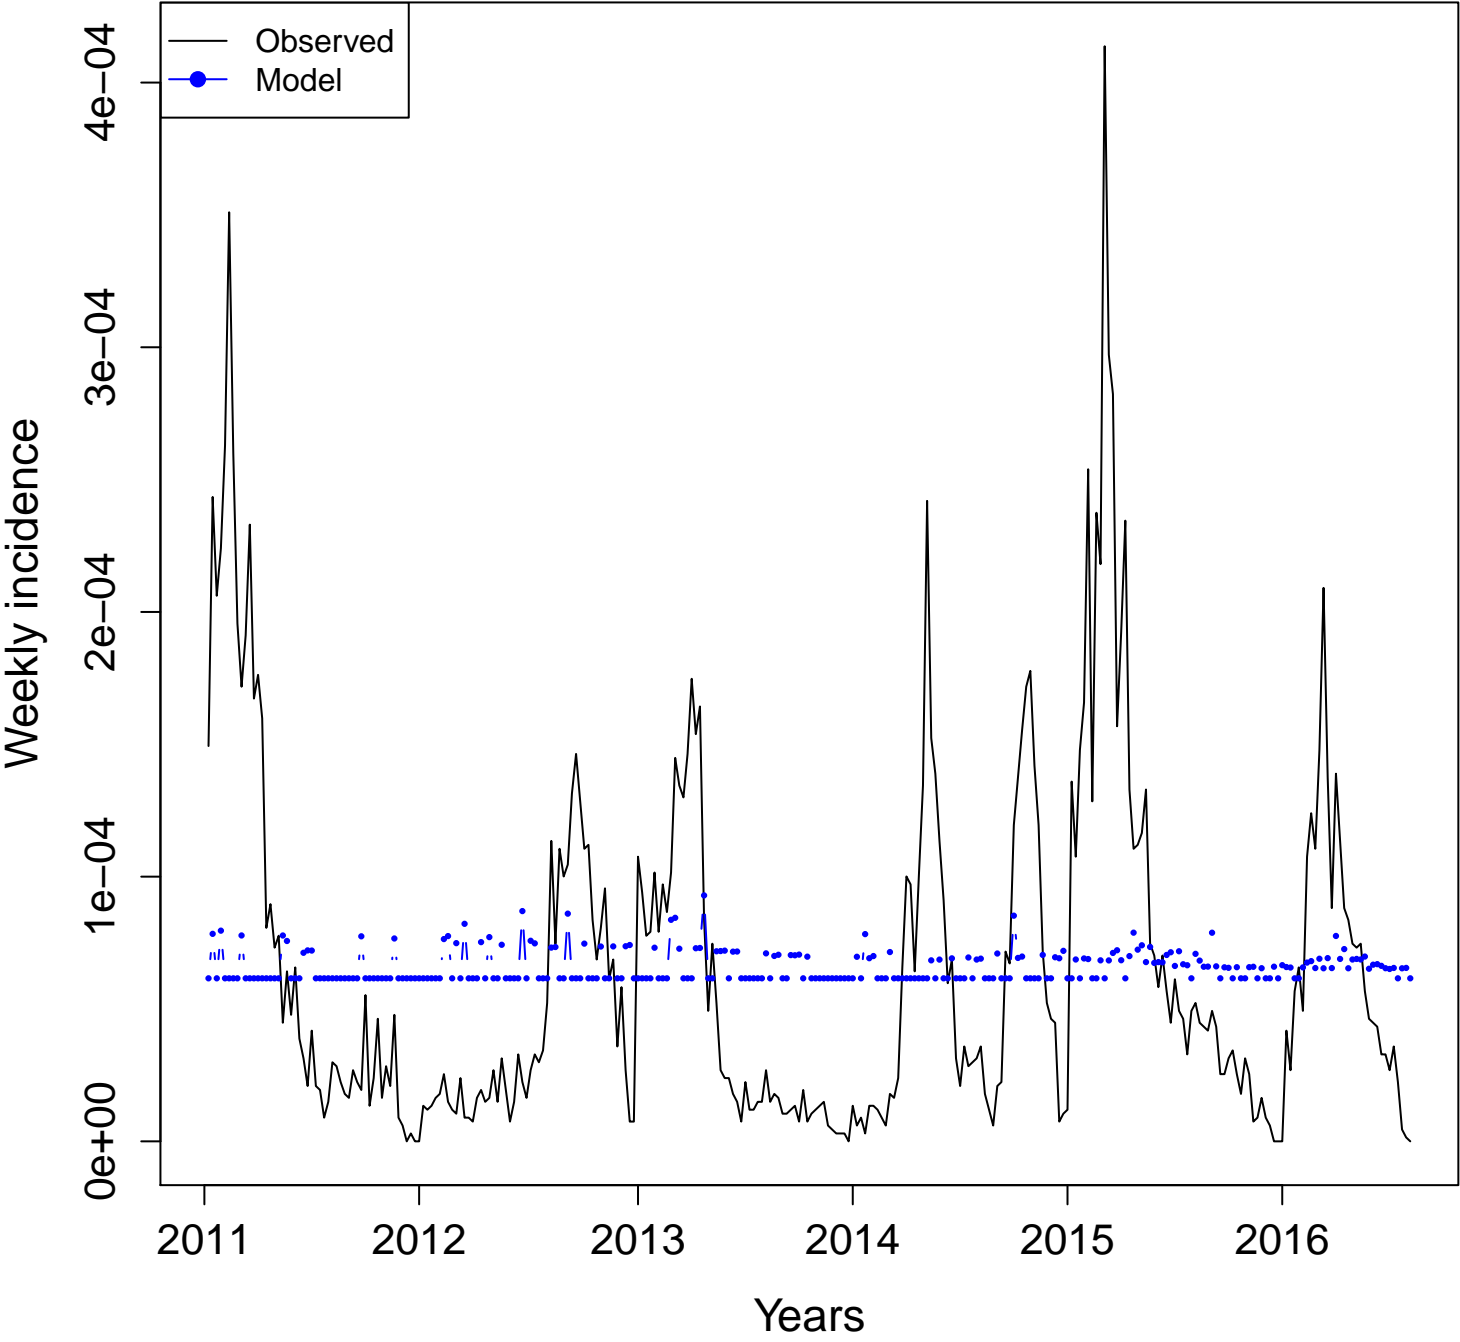

**AP- dengue.virus**  
**Adj. R squared = 0**

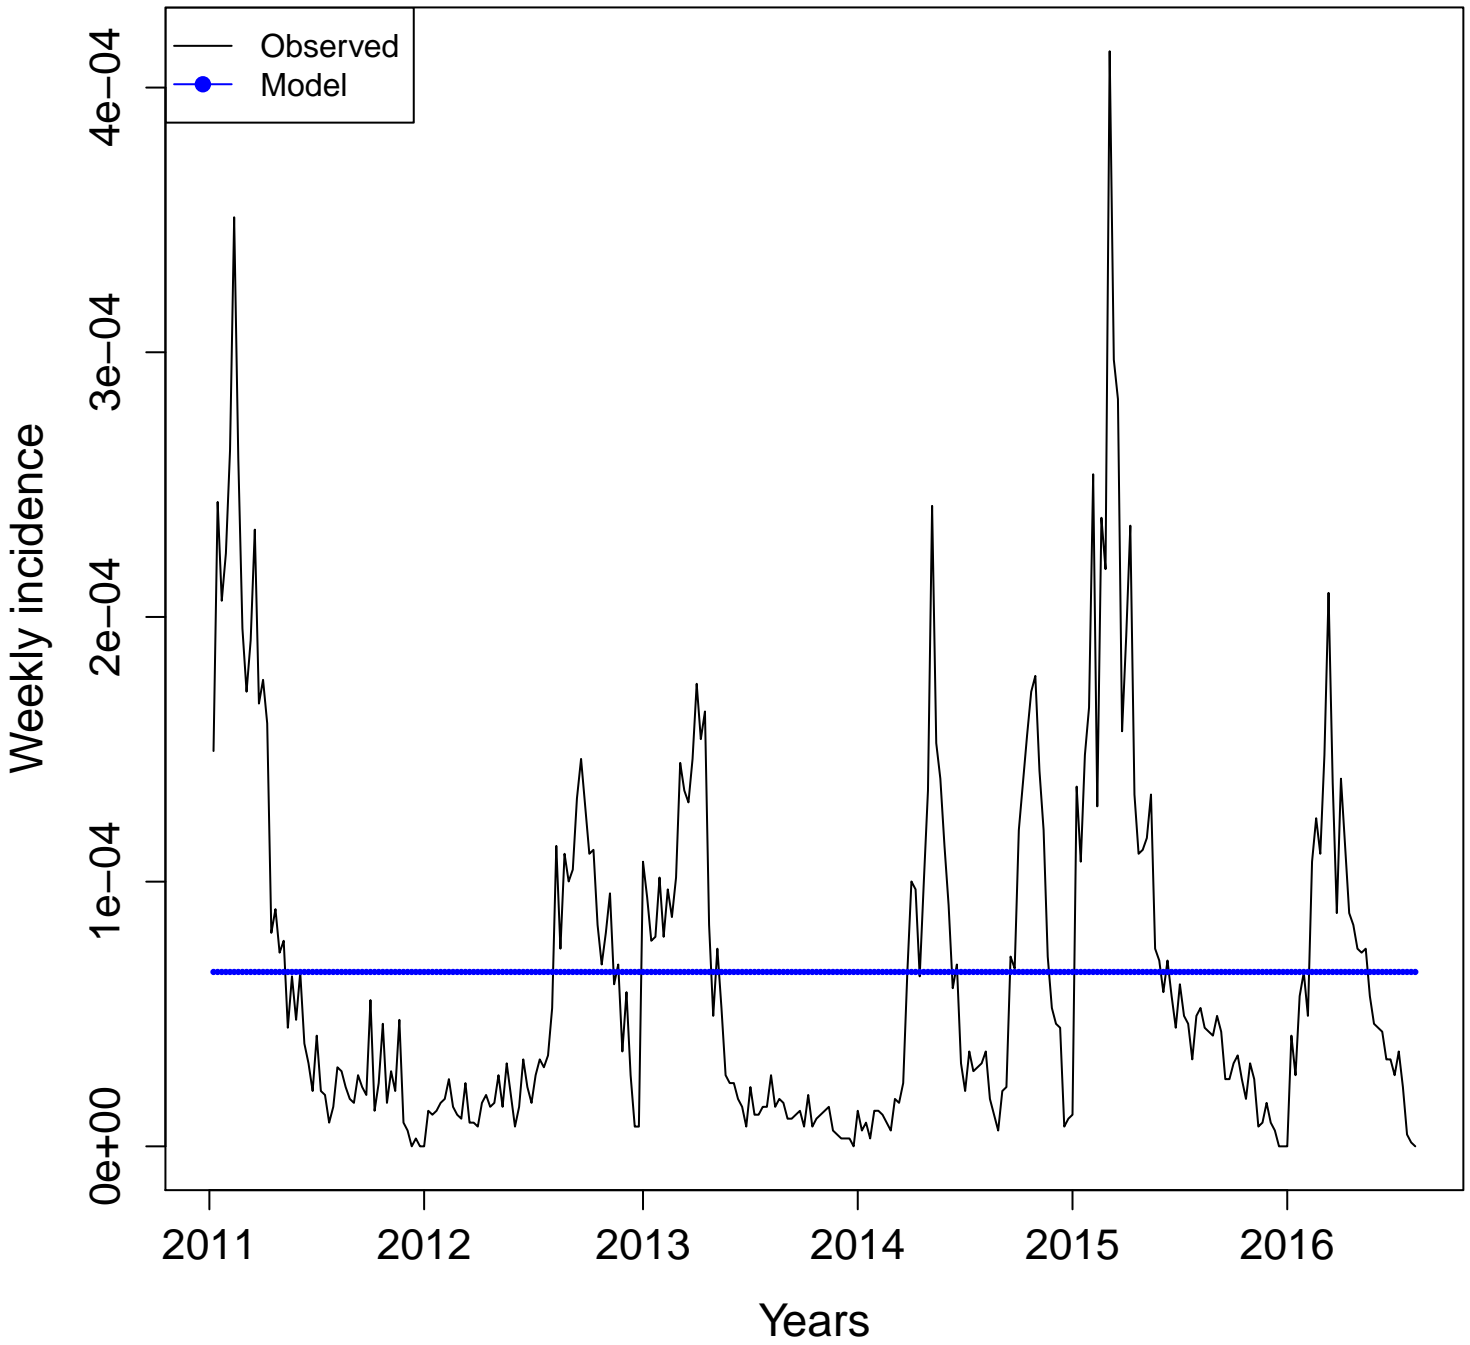



**AP- mosquito.dengue**  
**Adj. R squared = 0**

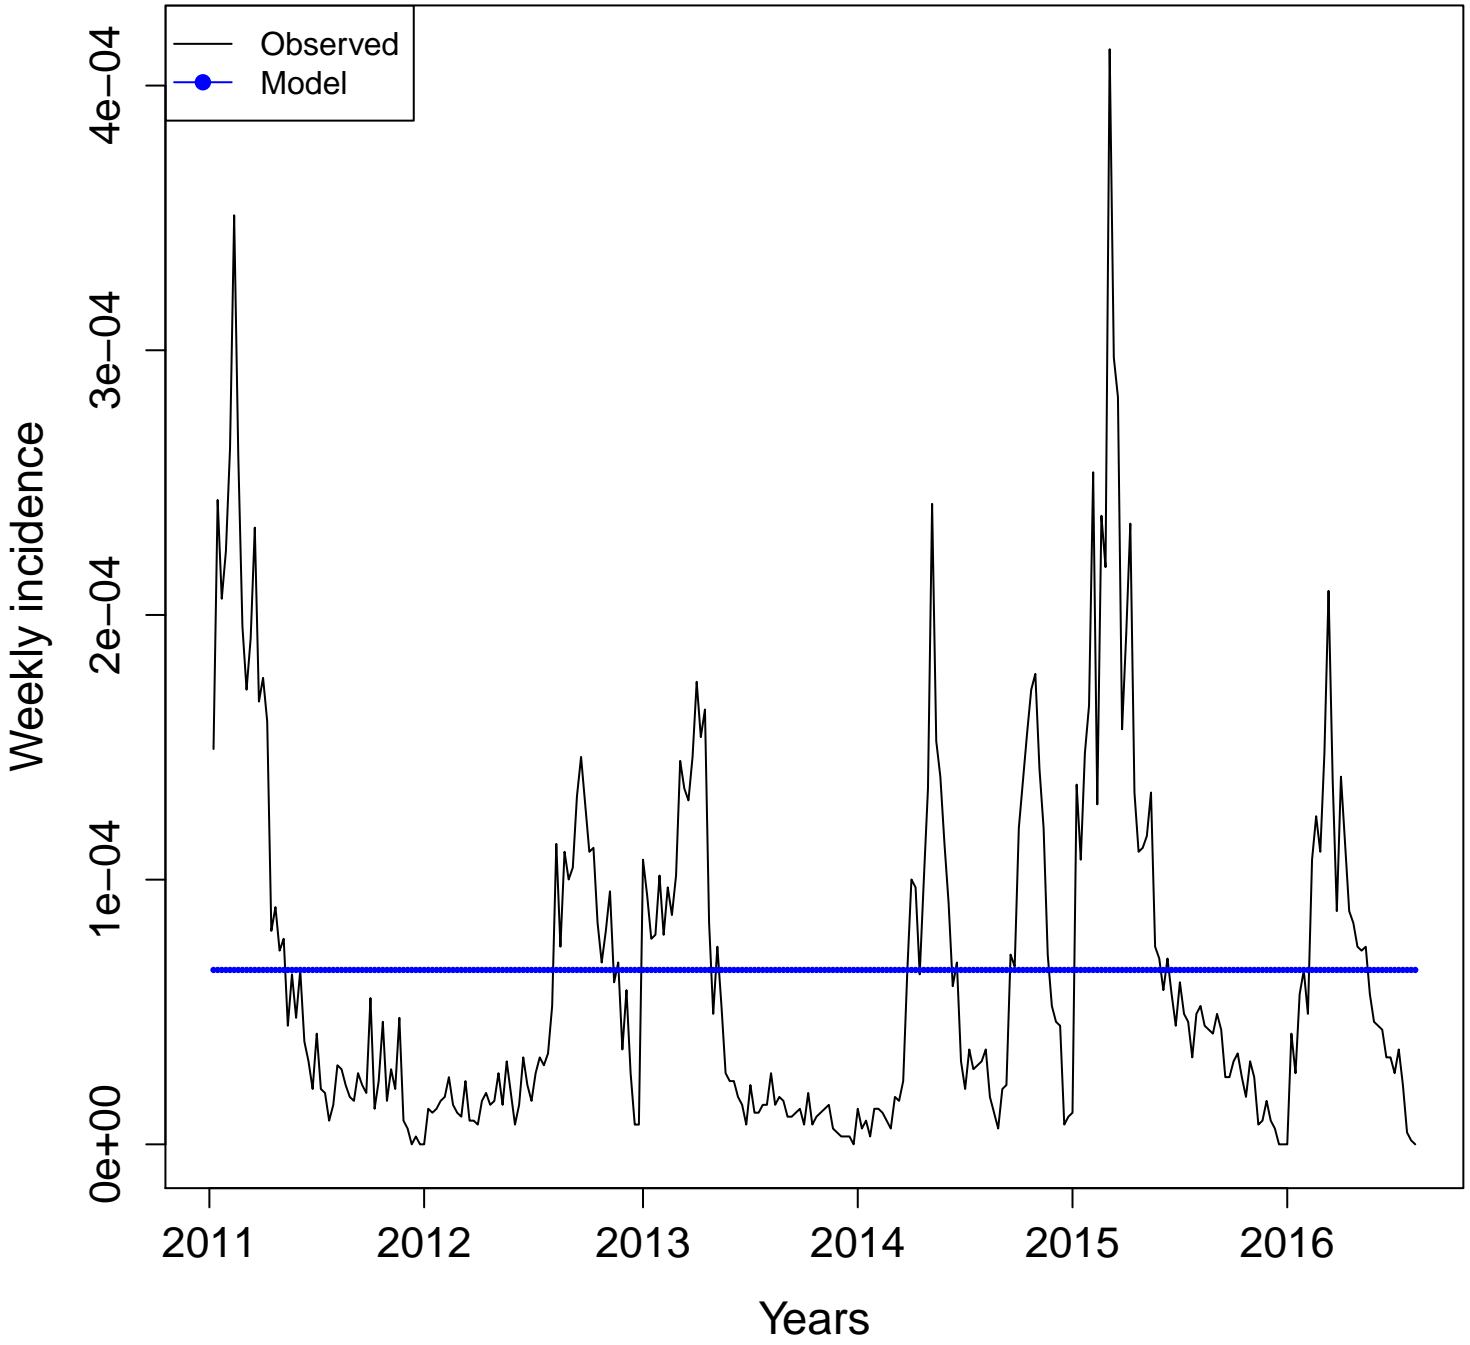

# AP- mosquito

Adj. R squared = 0.0355

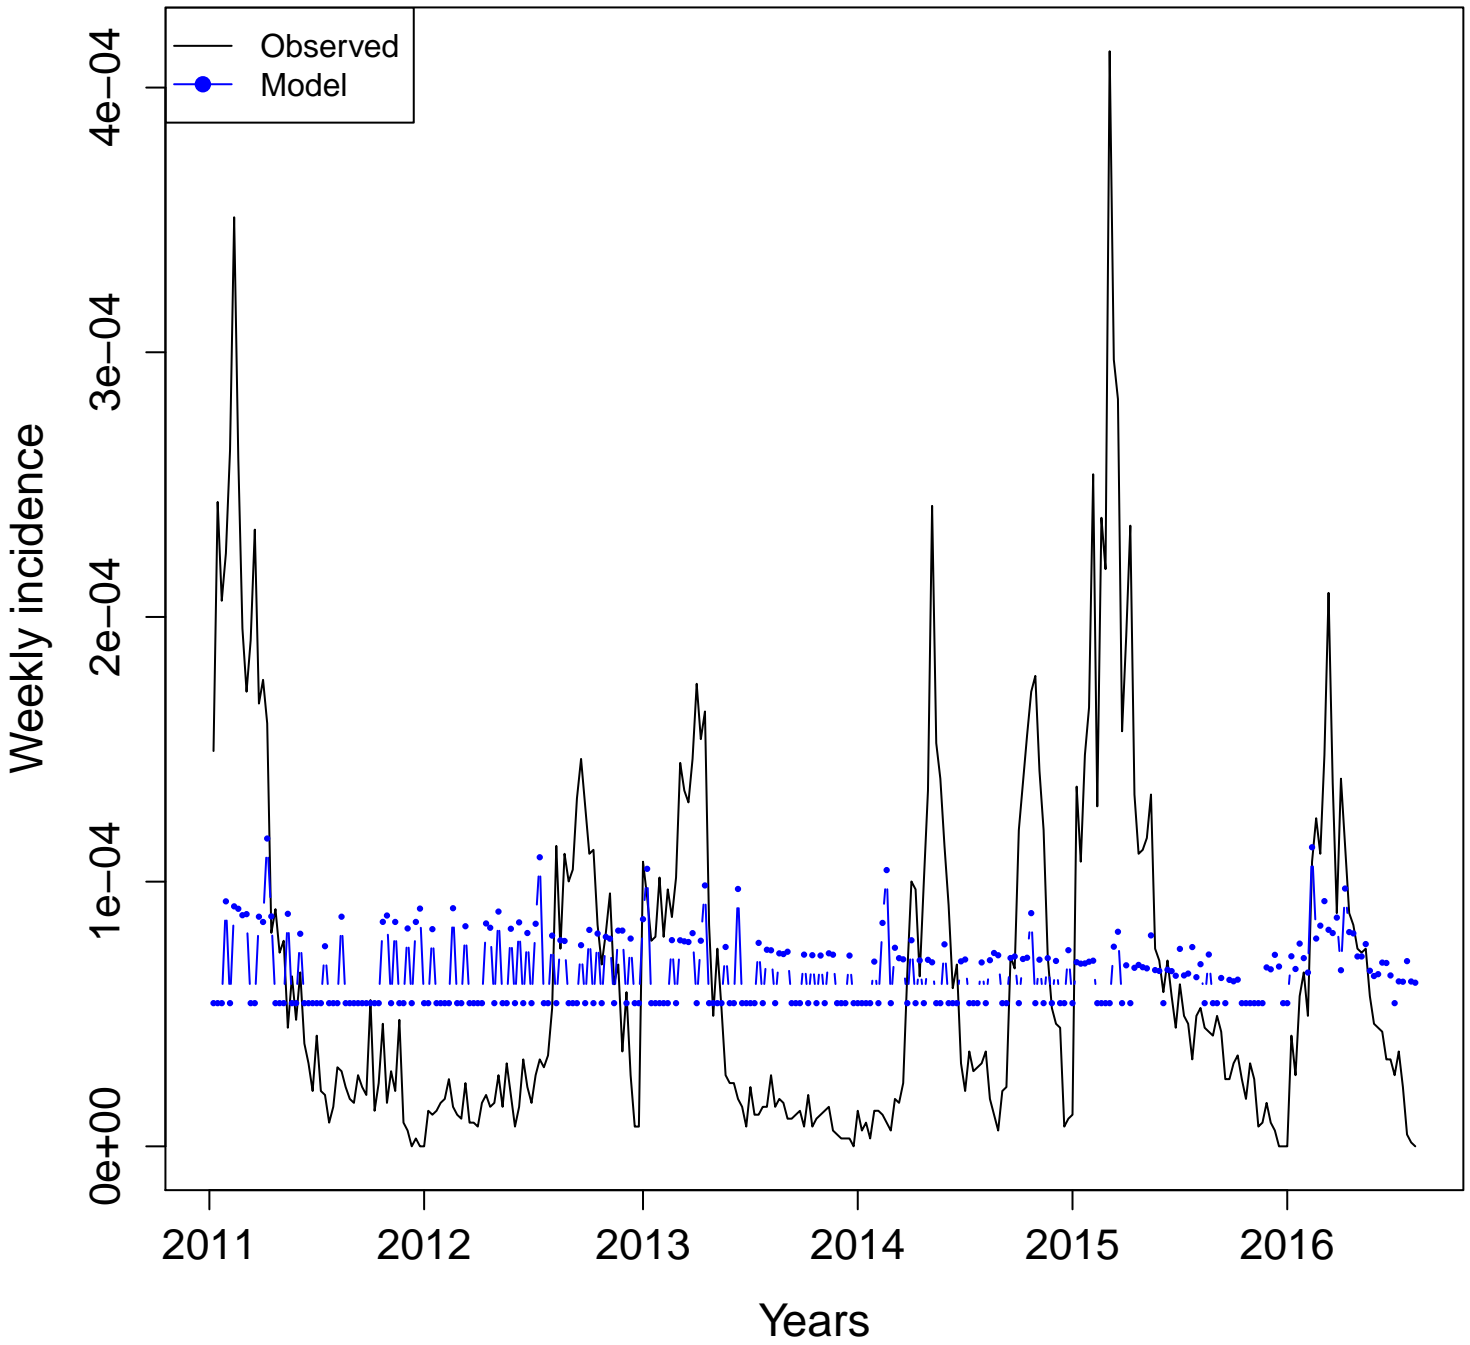

## Bahia (BA)

# Dengue incidence vs. Google Health Trends (2011–2016)

### Definitions:

- **Combined terms:**
  - **All:** model with all the available terms.  $n$  = number of terms
  - **Four:** model with "dengue", "dengue sintomas", "aedes", and "mosquito".
  - **Uncorrelated:** model with non-correlated terms.  $n$  = number of uncorrelated terms
- **Individual terms:** Plots developed with one term at a time.
- Terms for all and uncorrelated models can be found in additional file 3.

**Combined terms**  
**Adjusted R squared**

**Bahia (BA)**

**All**  
**(n = 11)**

**BR-BA**  
**Adj. R squared = 0.6472**

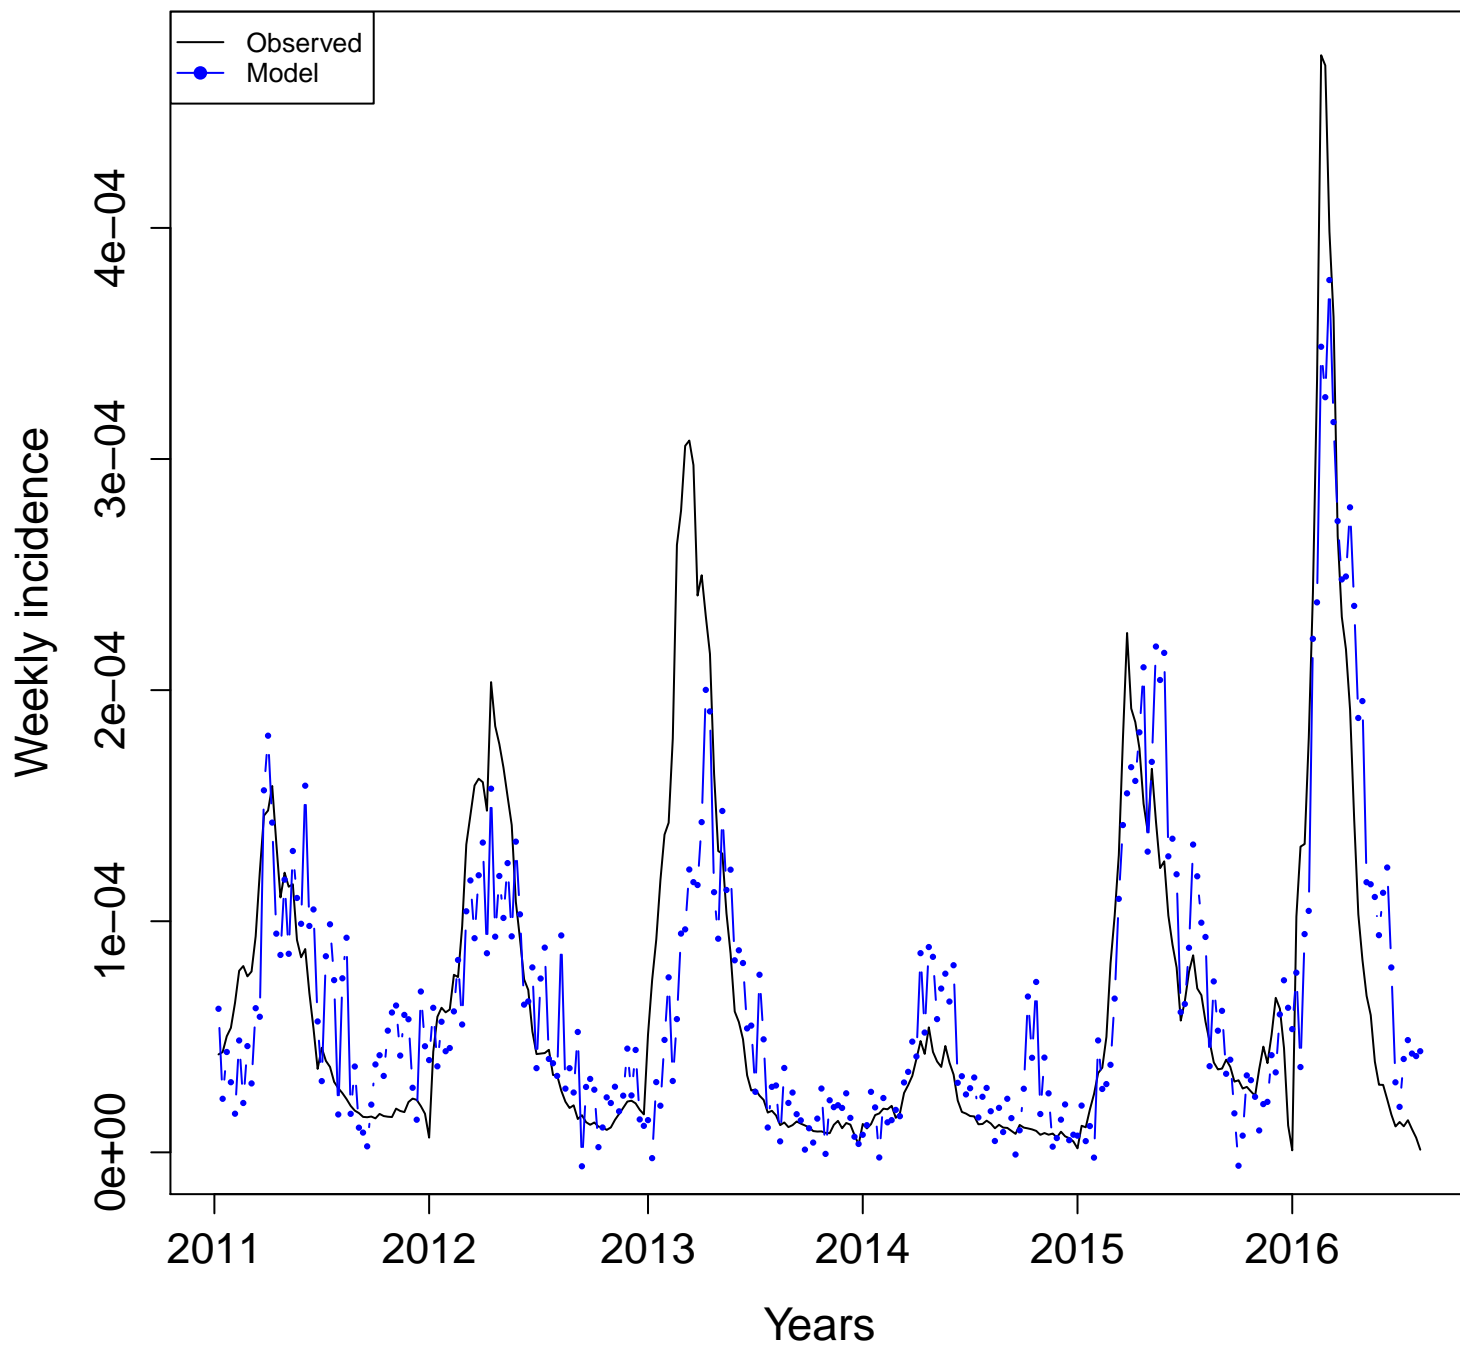

**BR-BA**  
**Adj. R squared = 0.6238**

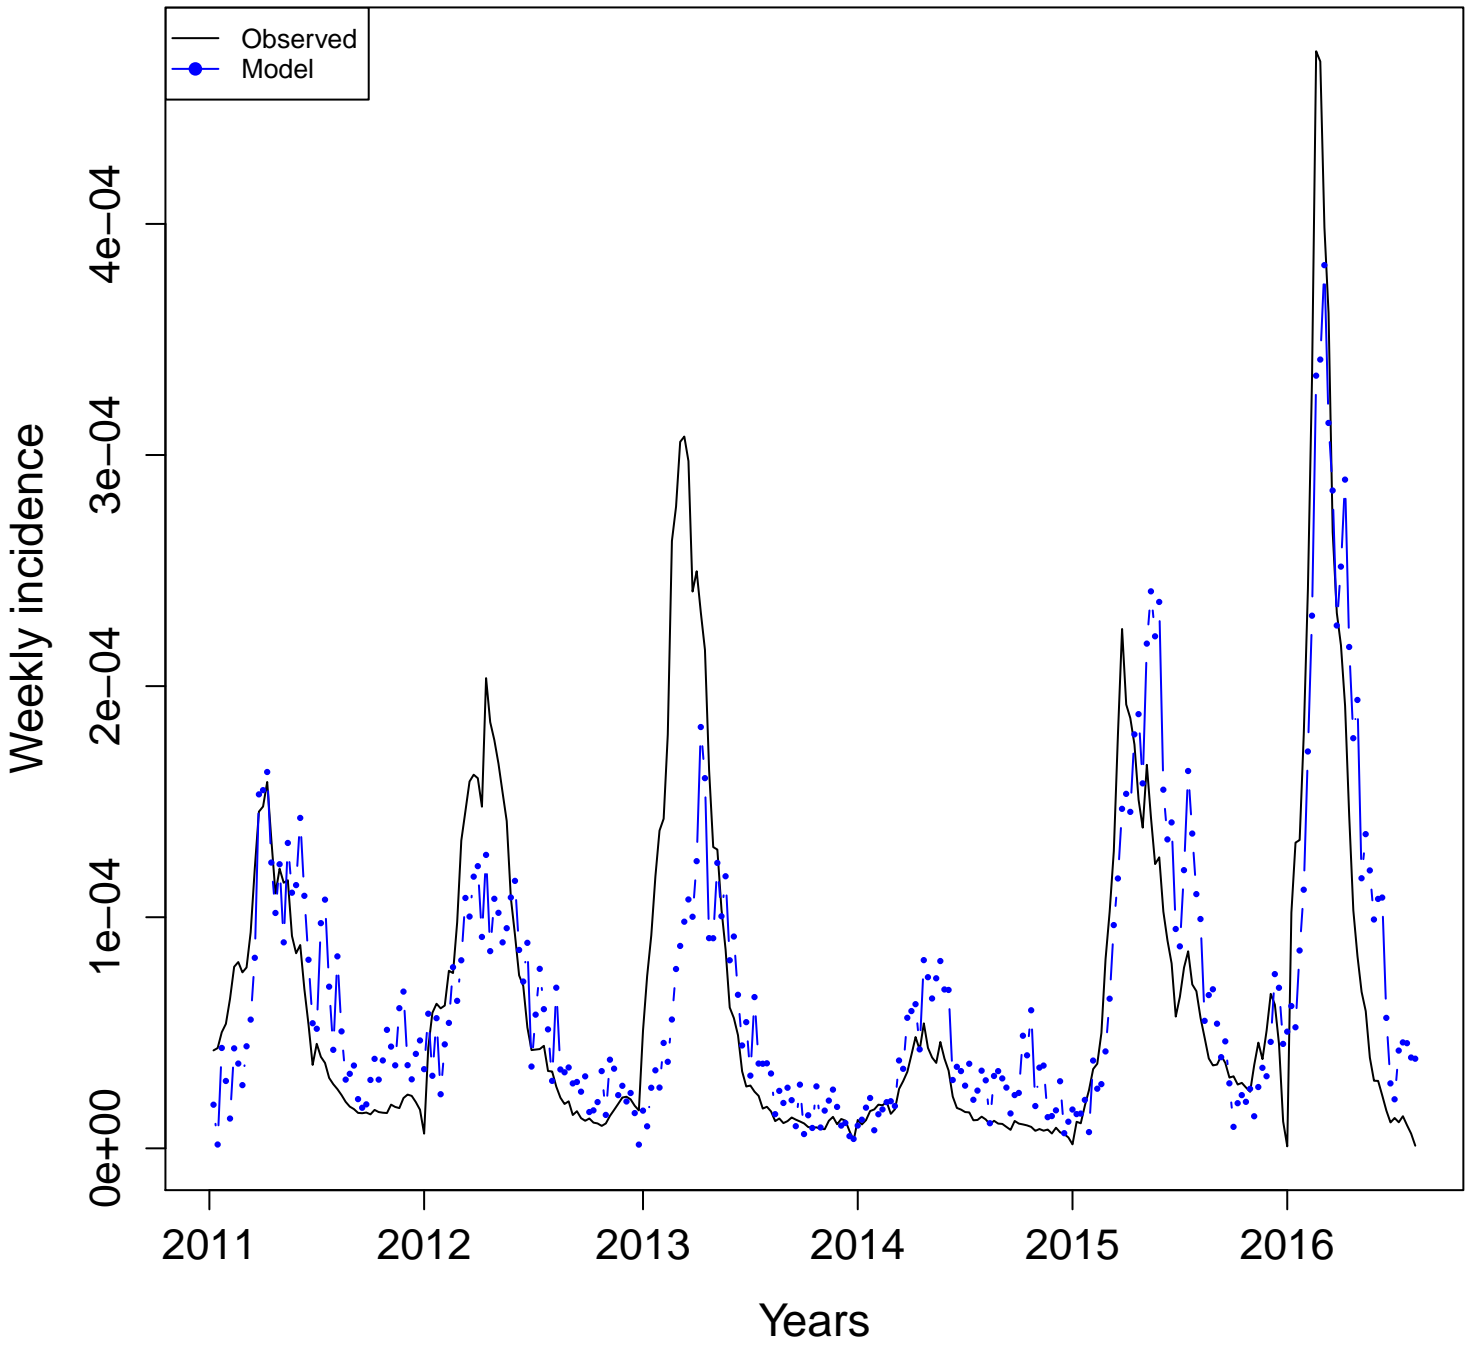

**Uncorrelated  
(n = 3)**

**BR-BA  
Adj. R squared = 0.6032**

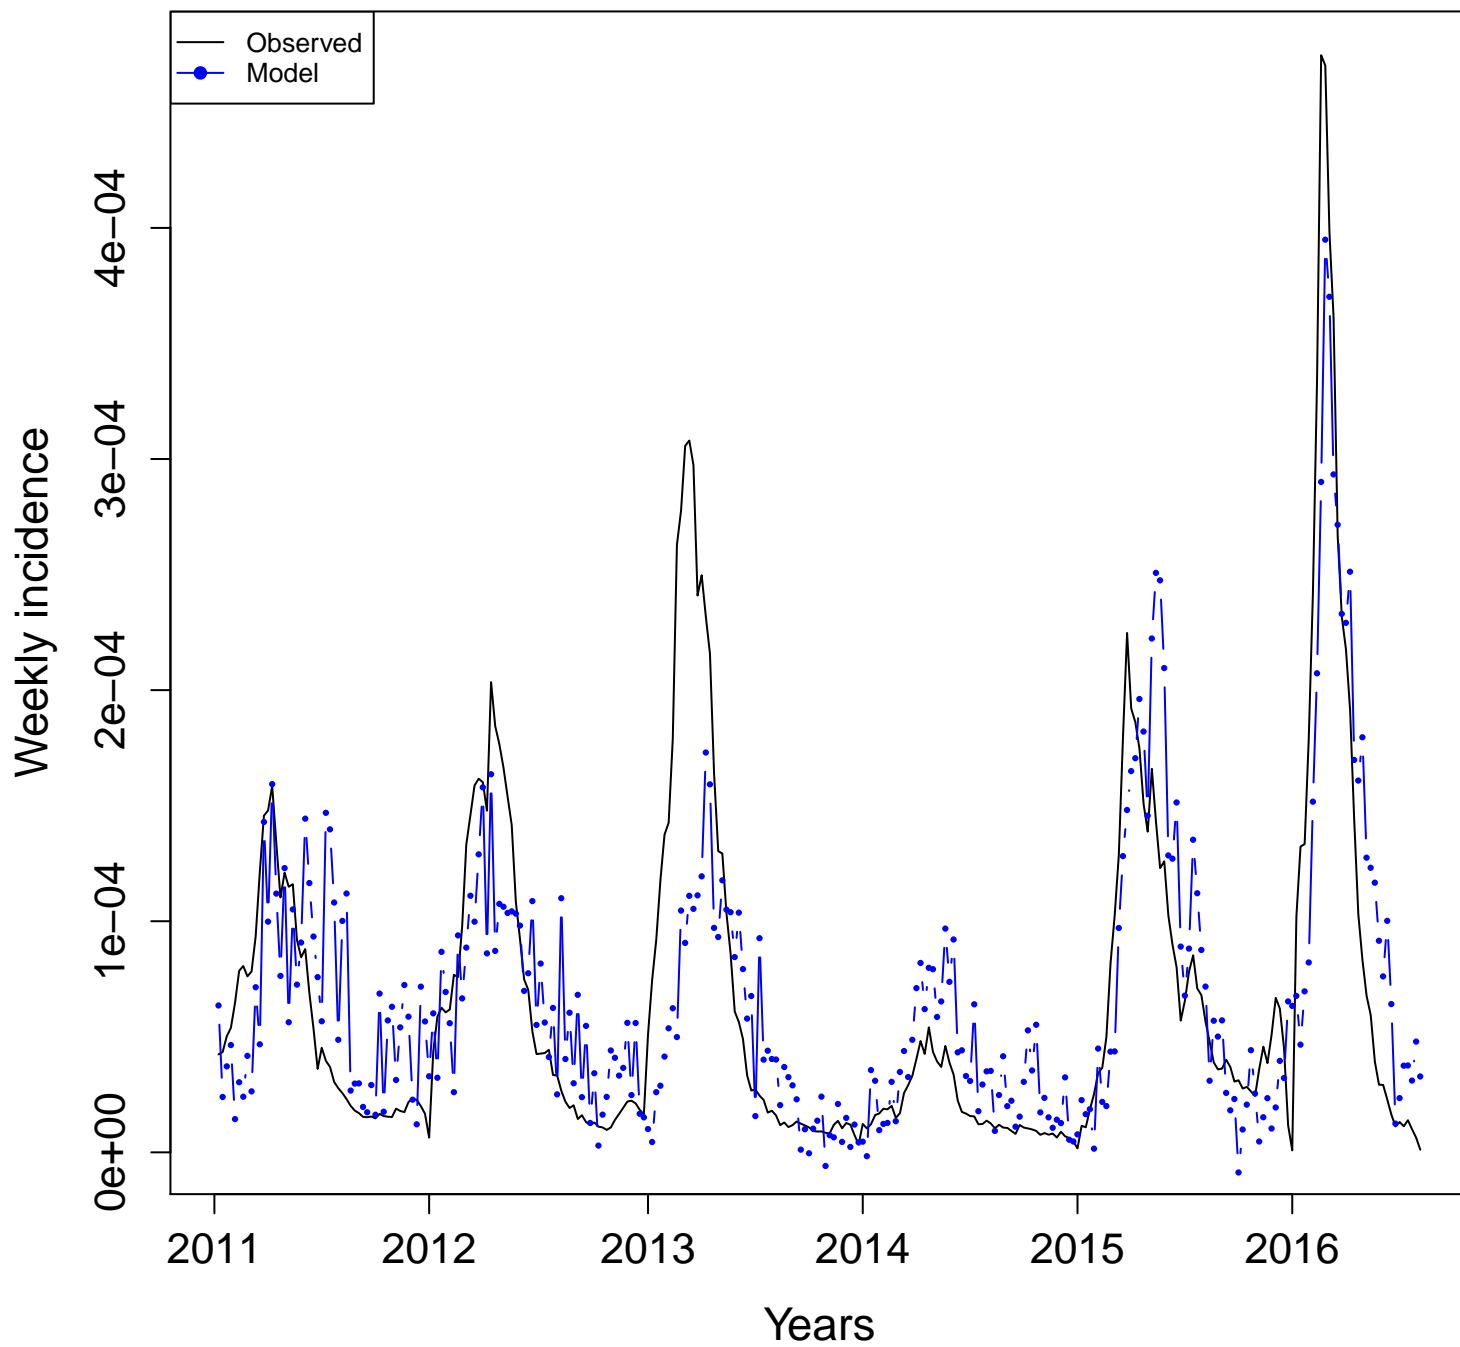

**Individual terms**  
**Adjusted R squared**

**Bahia (BA)**



**BA- aedes.aegypti**  
**Adj. R squared = 0.3272**

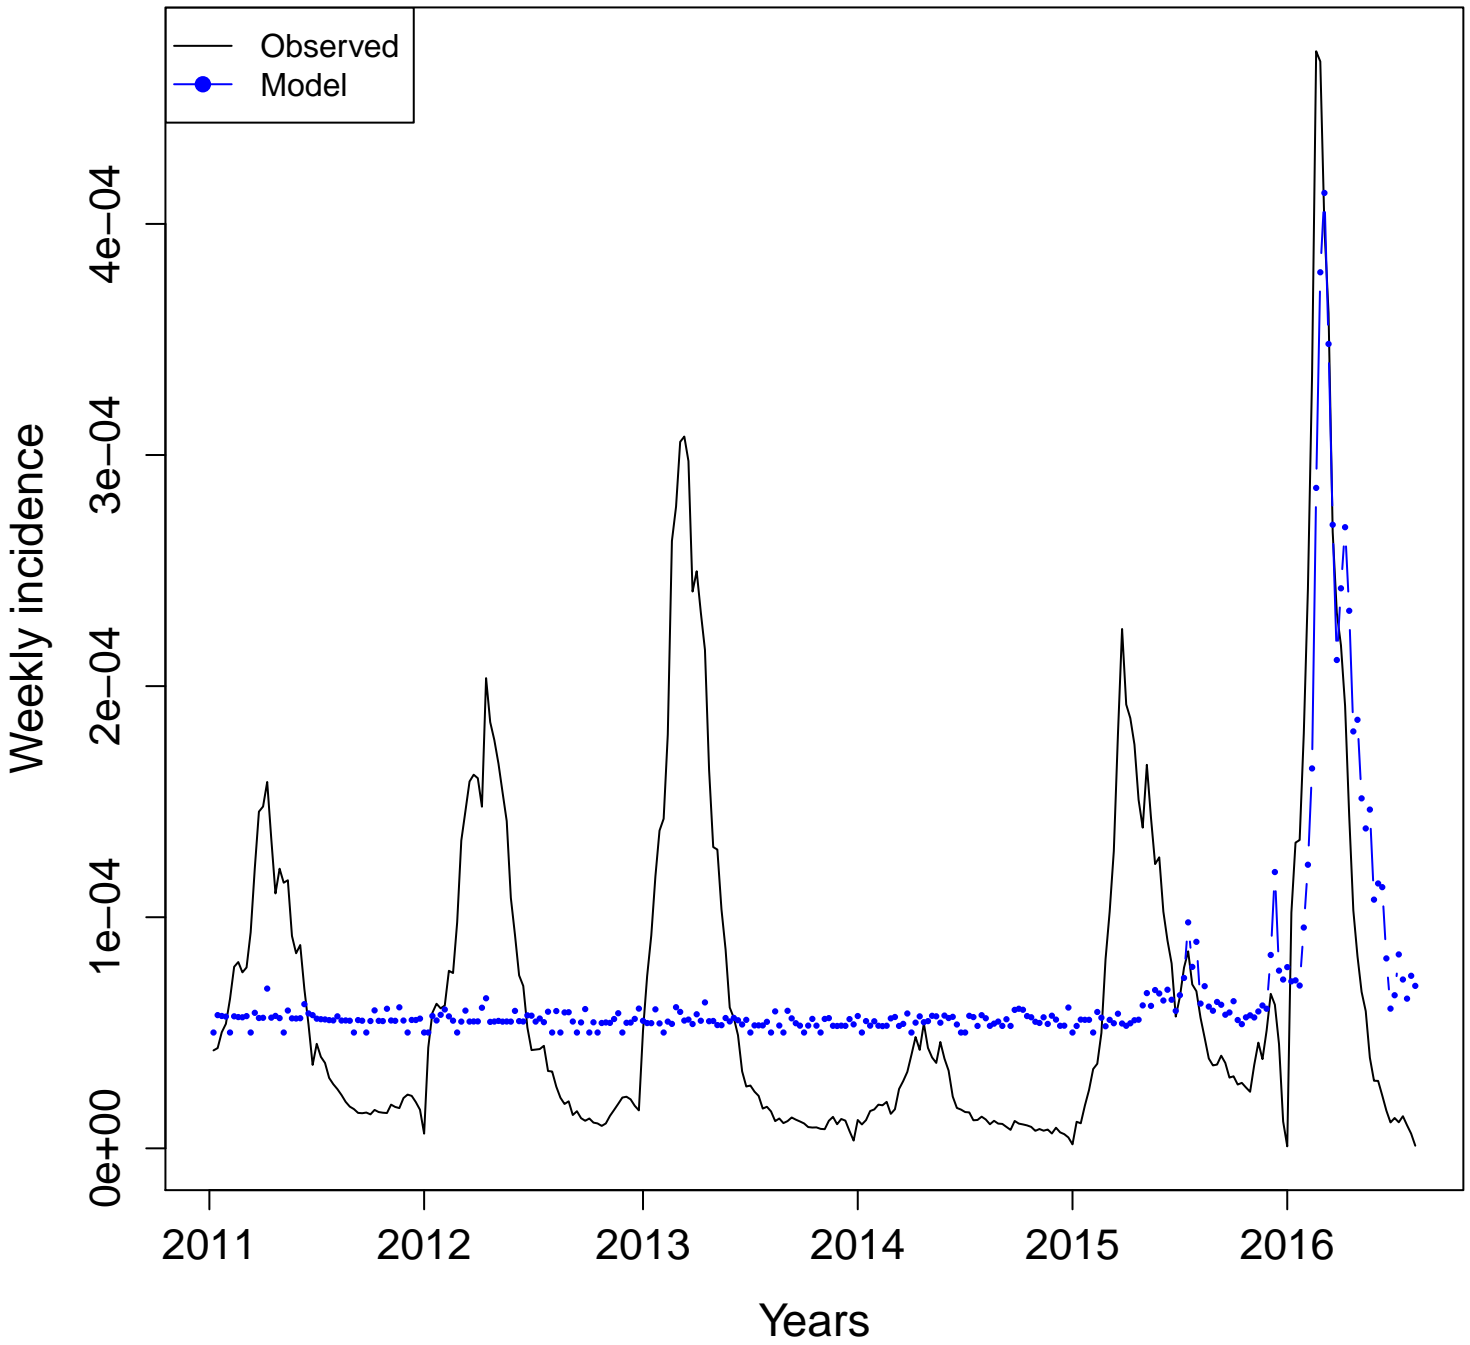

**BA- aedes**  
**Adj. R squared = 0.3301**

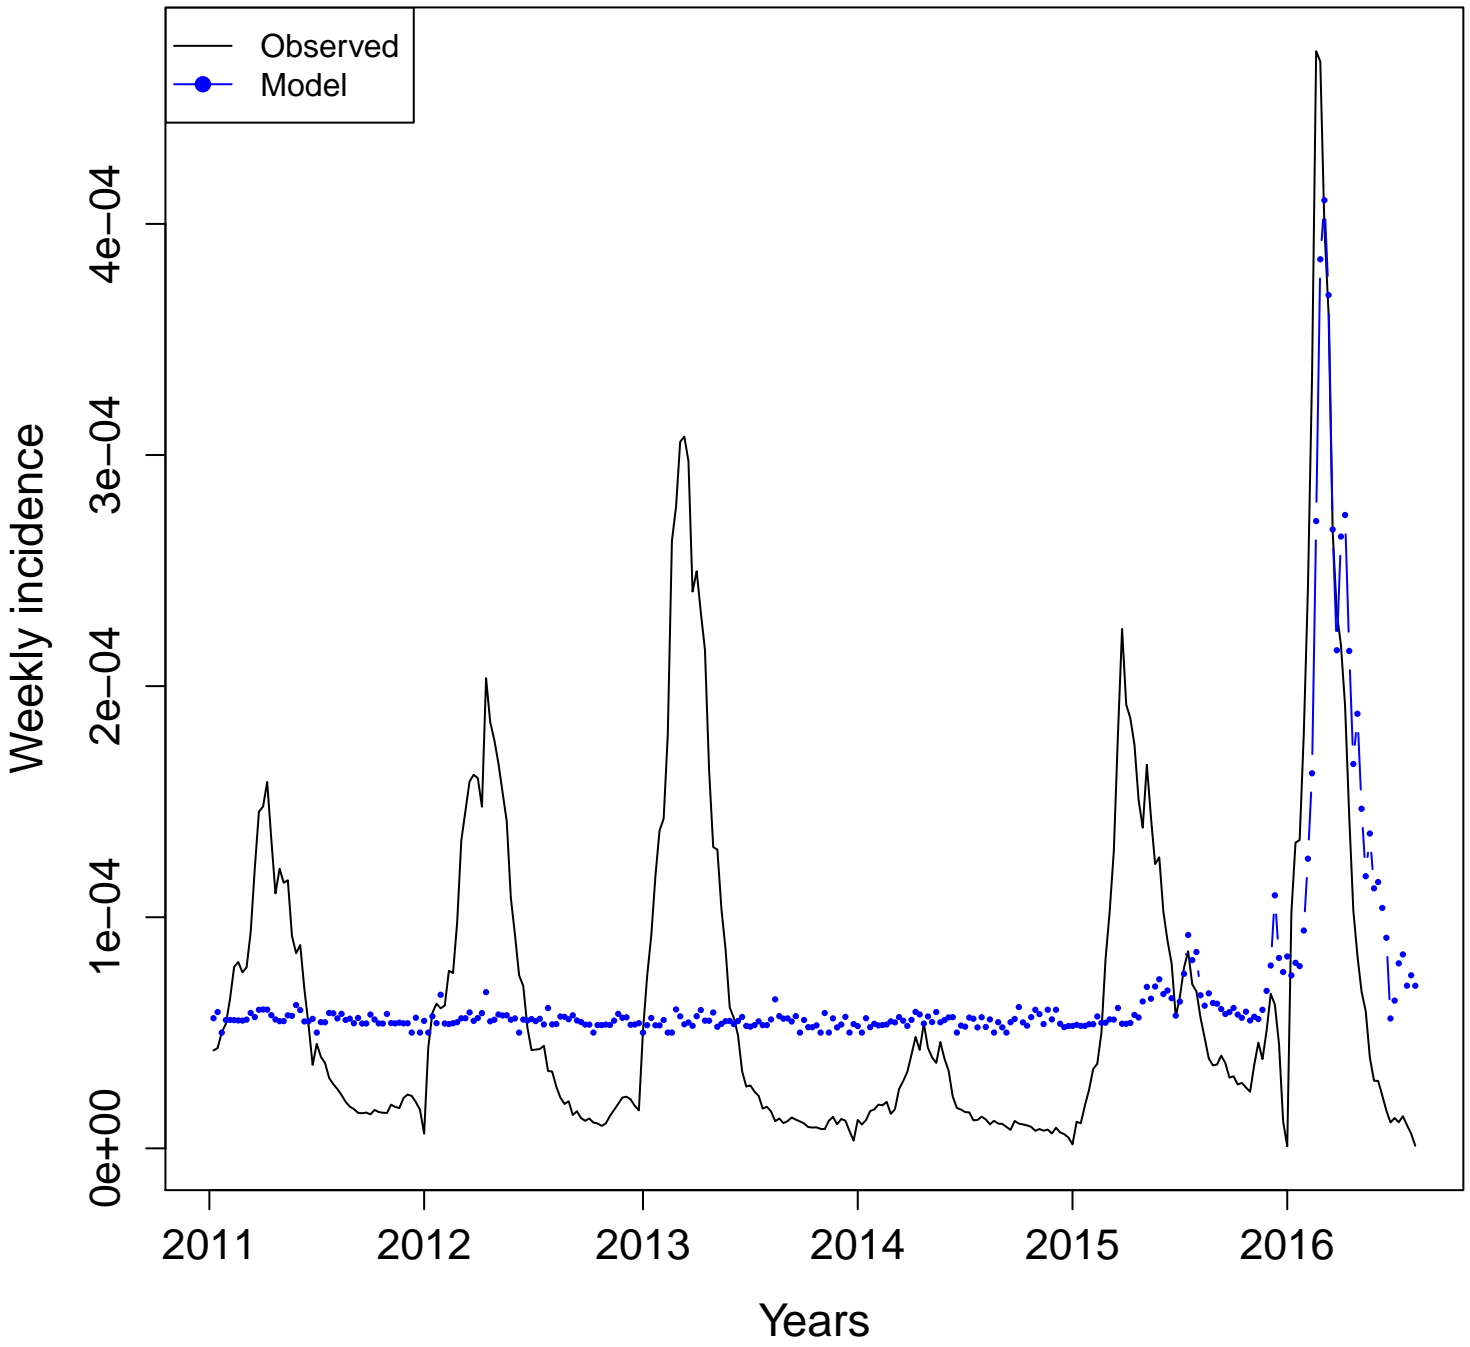

**BA- aegypti**  
**Adj. R squared = 0.3254**

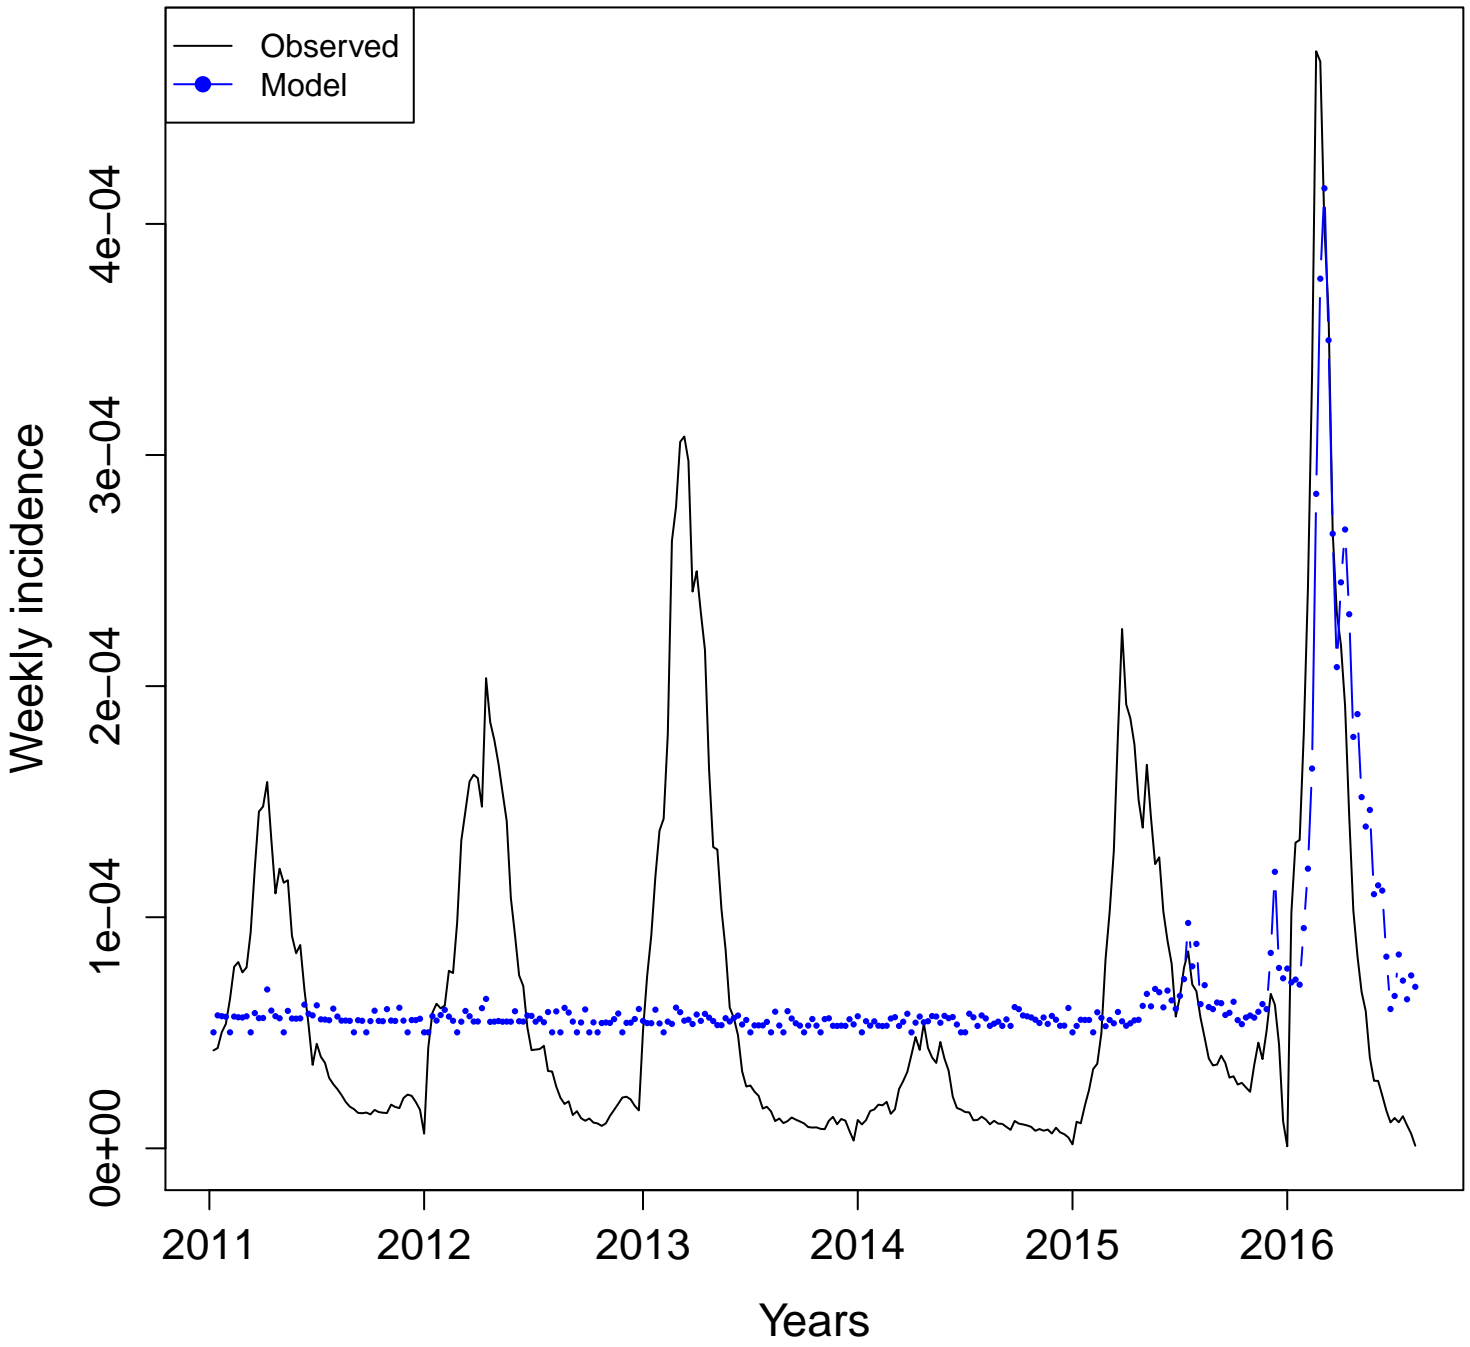

**BA- dengue.fever**  
**Adj. R squared = 0.063**

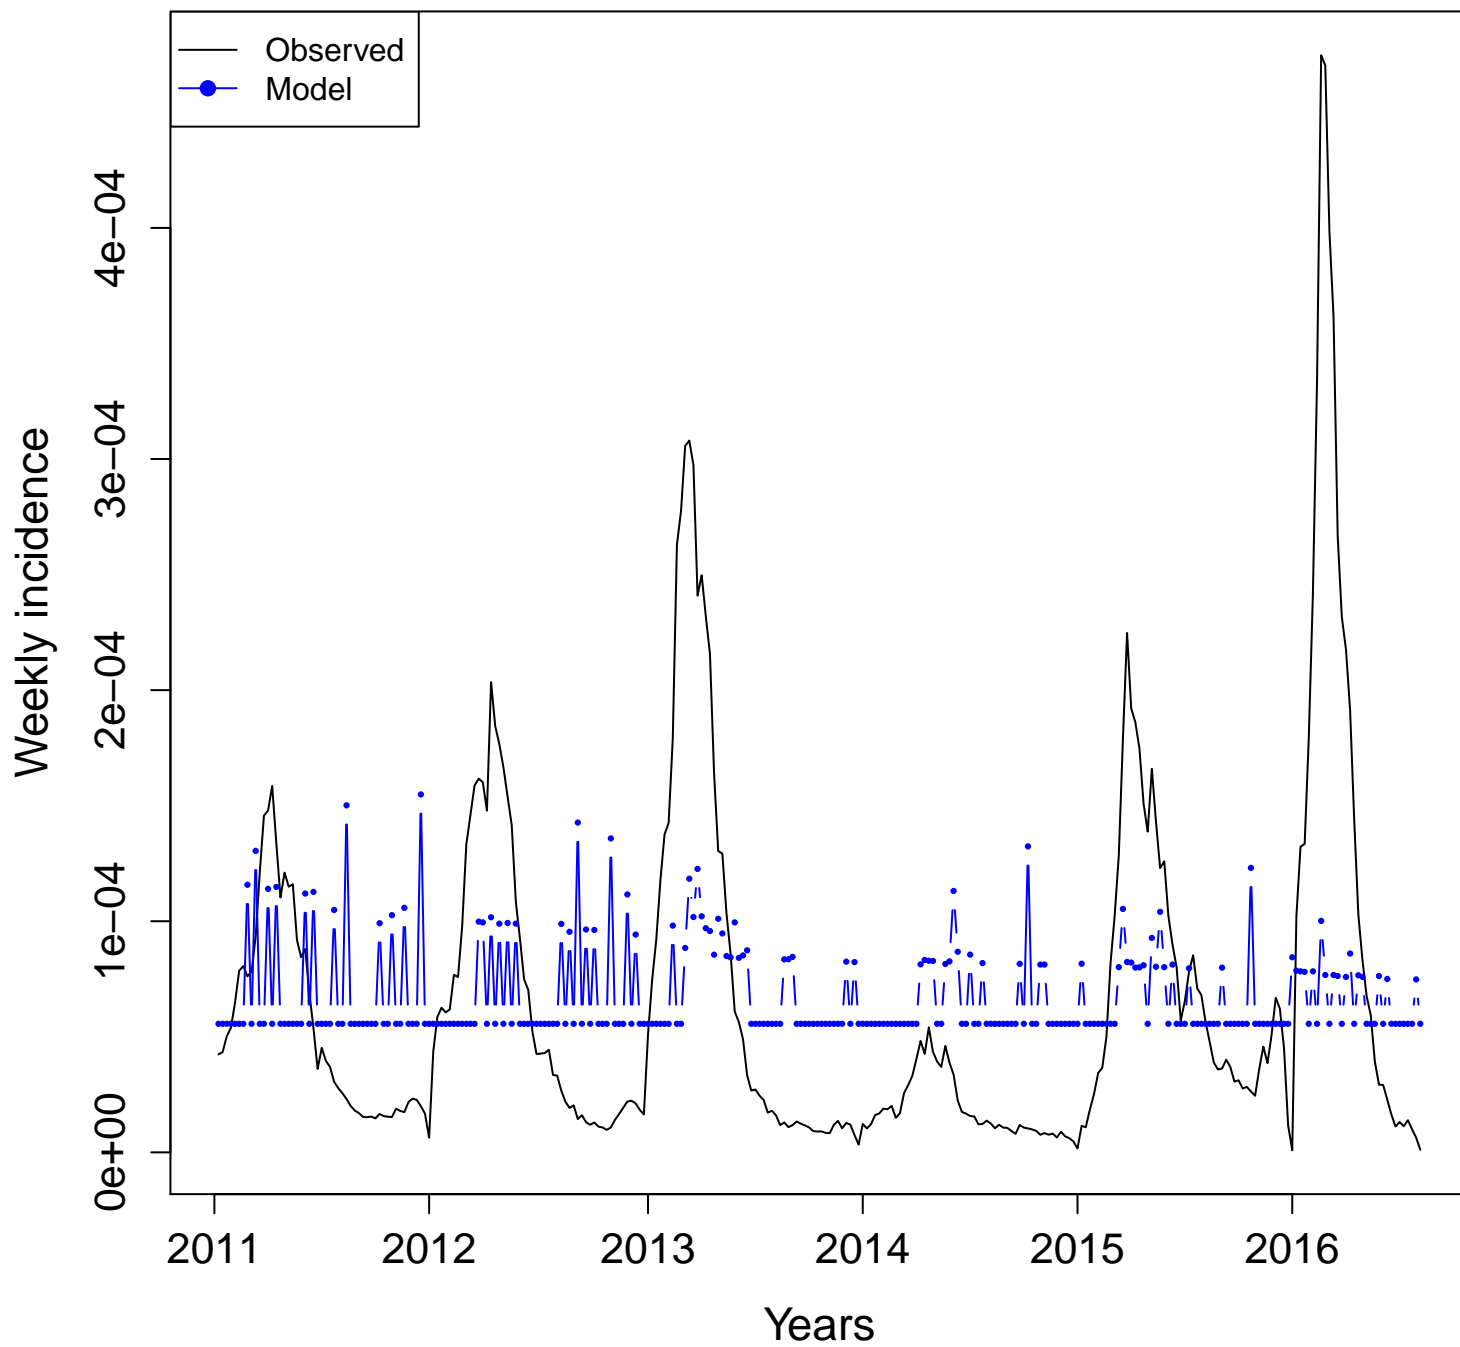

# BA- dengue

Adj. R squared = 0.5657

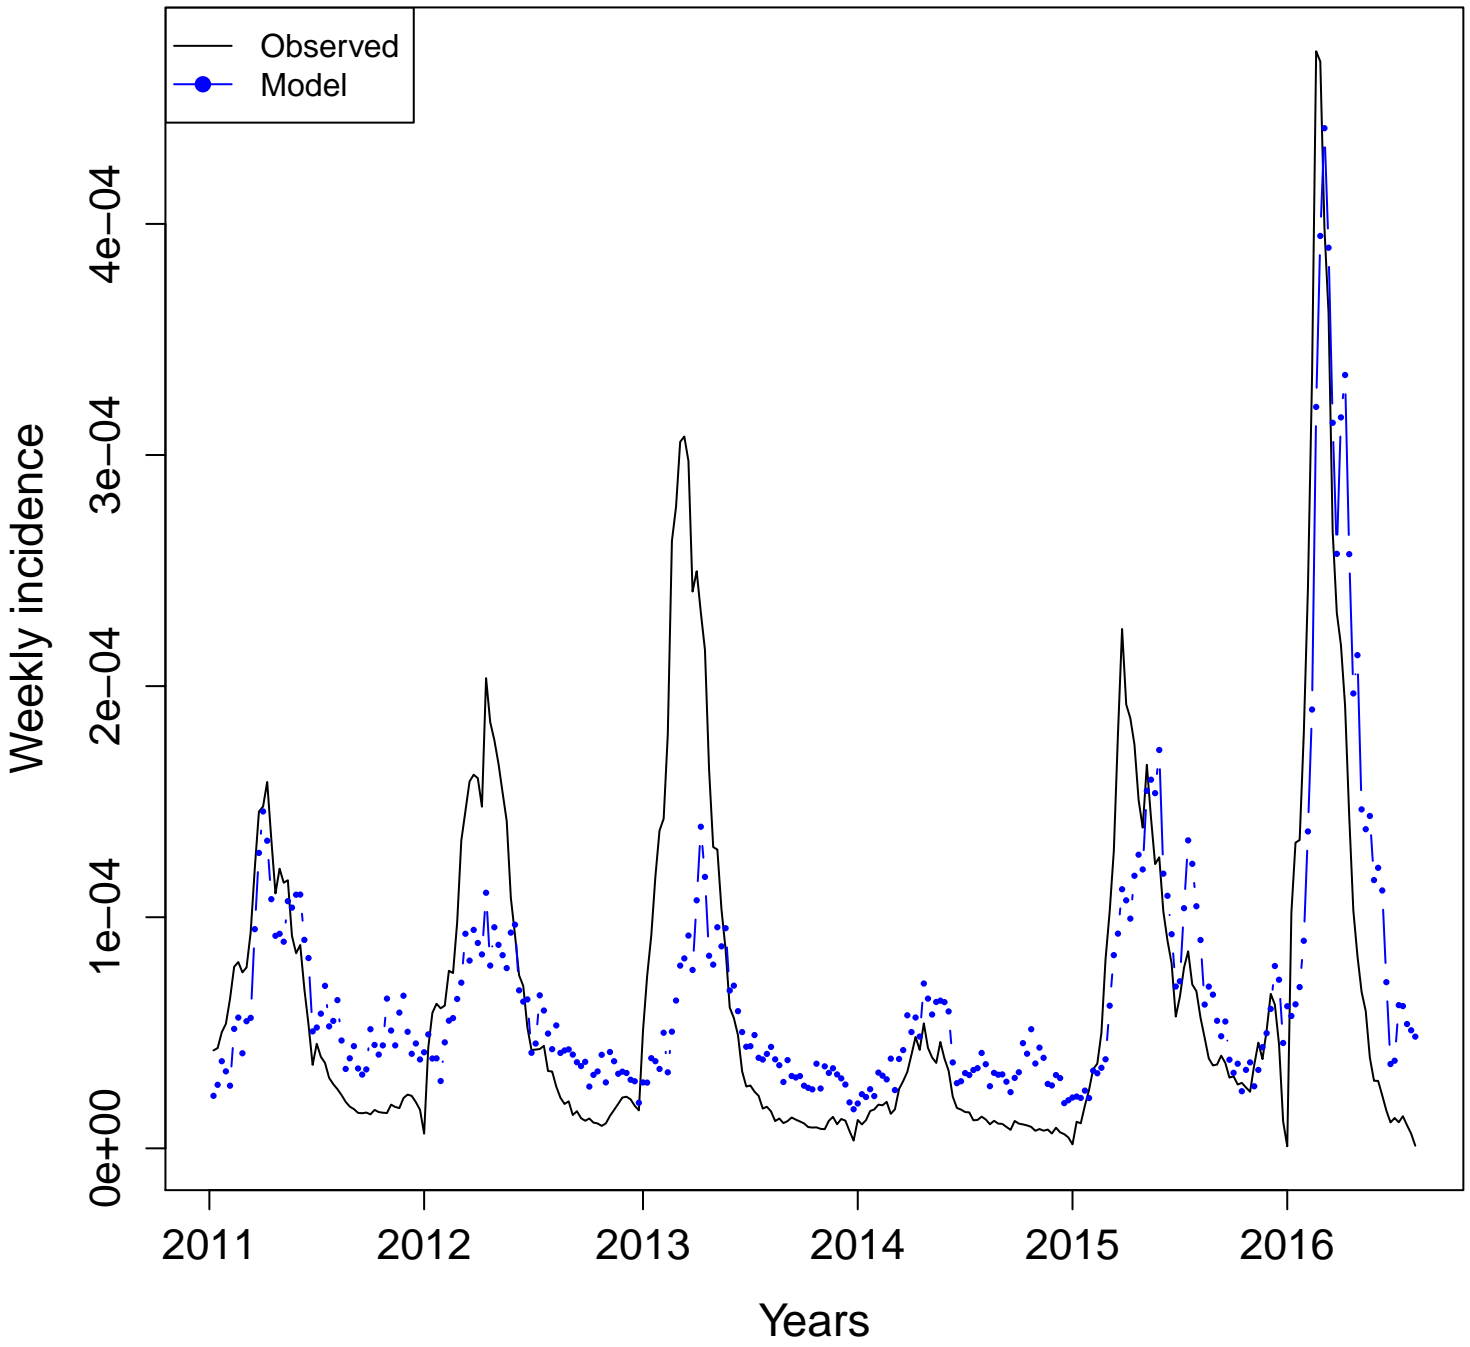

**BA- dengue.sintomas**  
**Adj. R squared = 0.5927**

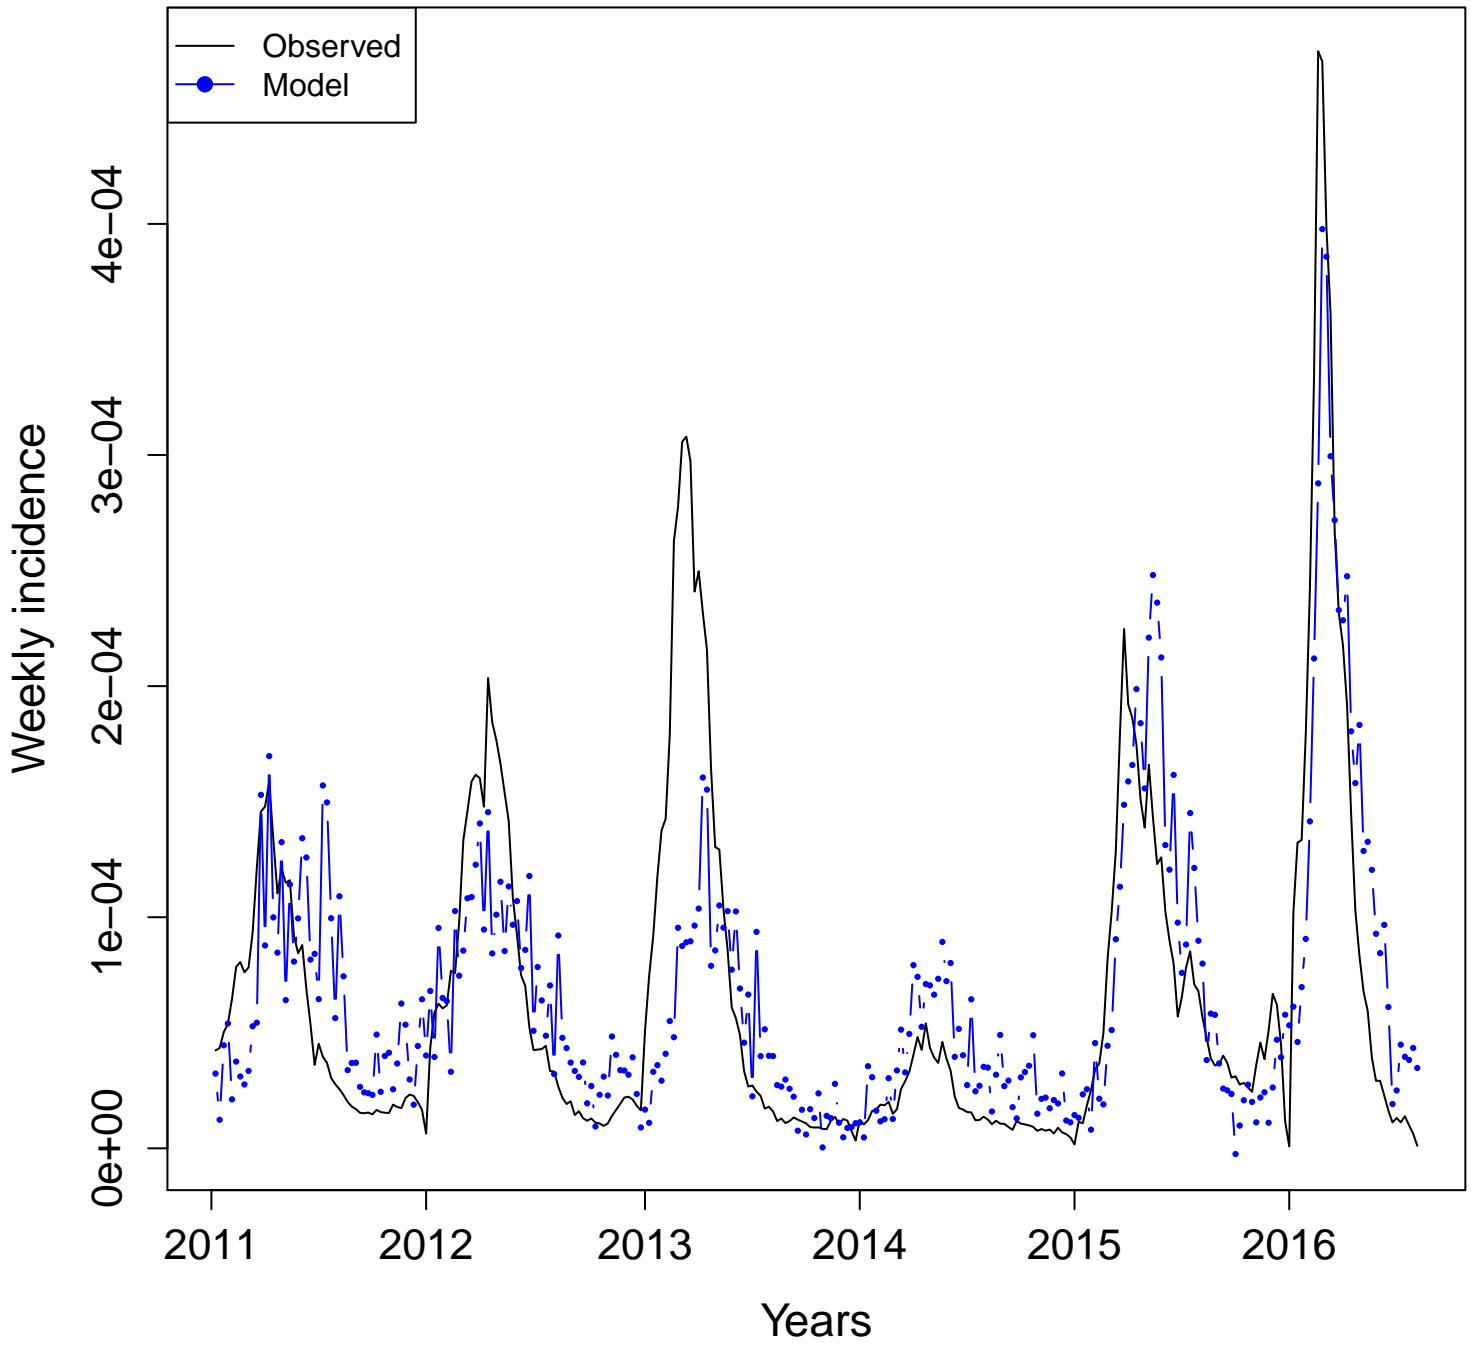

**BA- dengue.virus**  
**Adj. R squared = 0.3526**

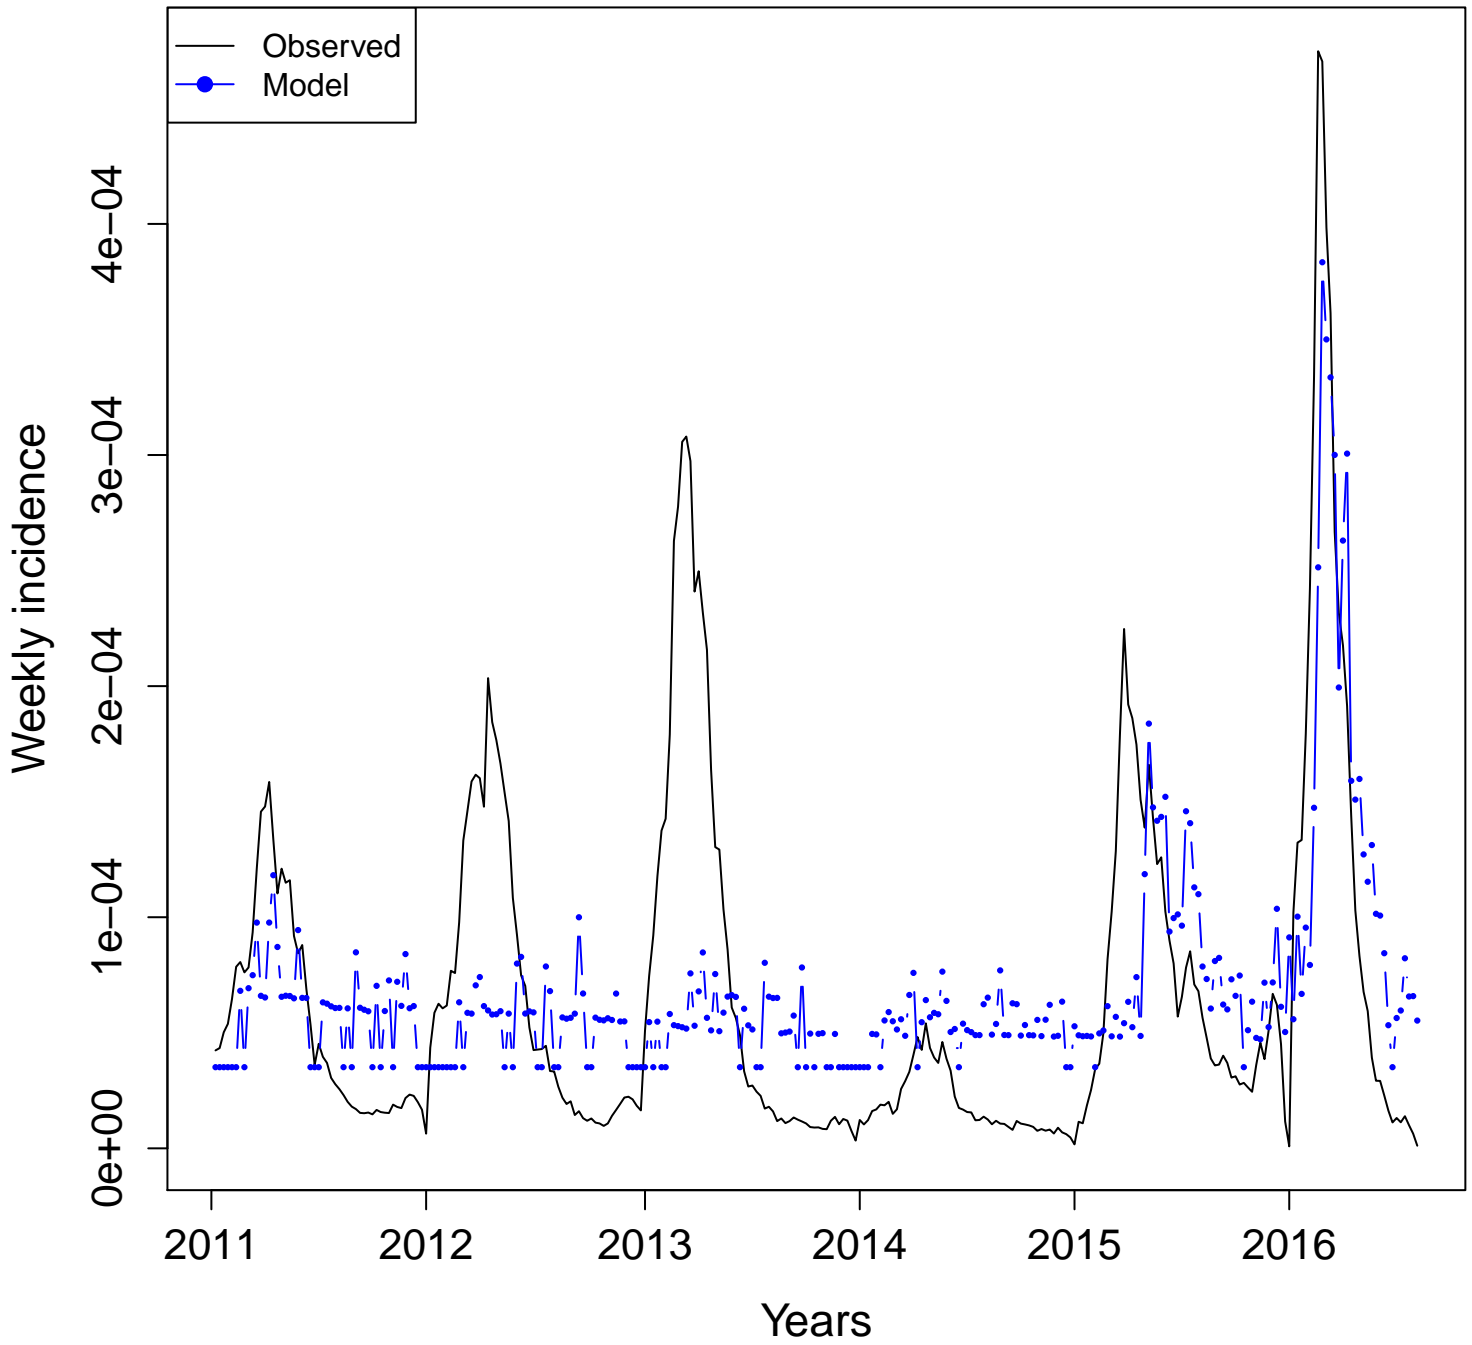

**BA- DHF**  
**Adj. R squared = 7e-04**

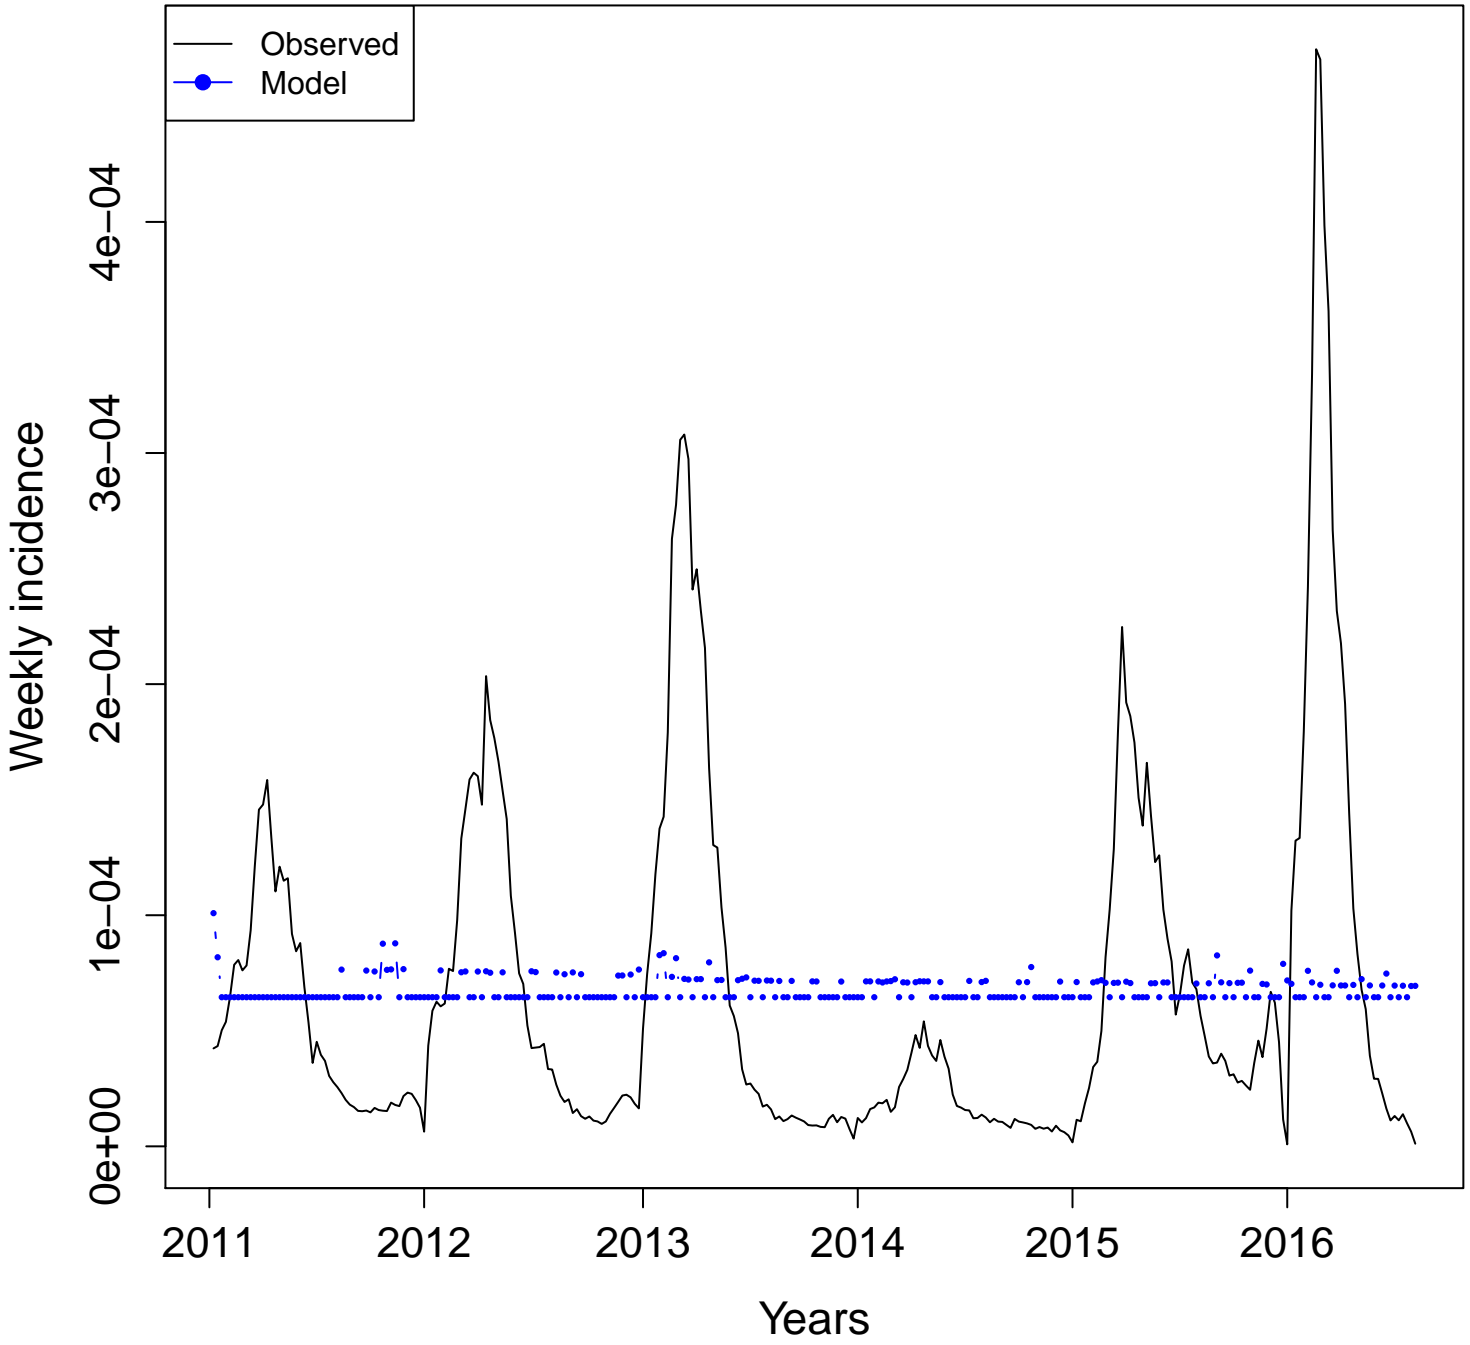



**BA- mosquito.dengue**  
**Adj. R squared = 0.4272**

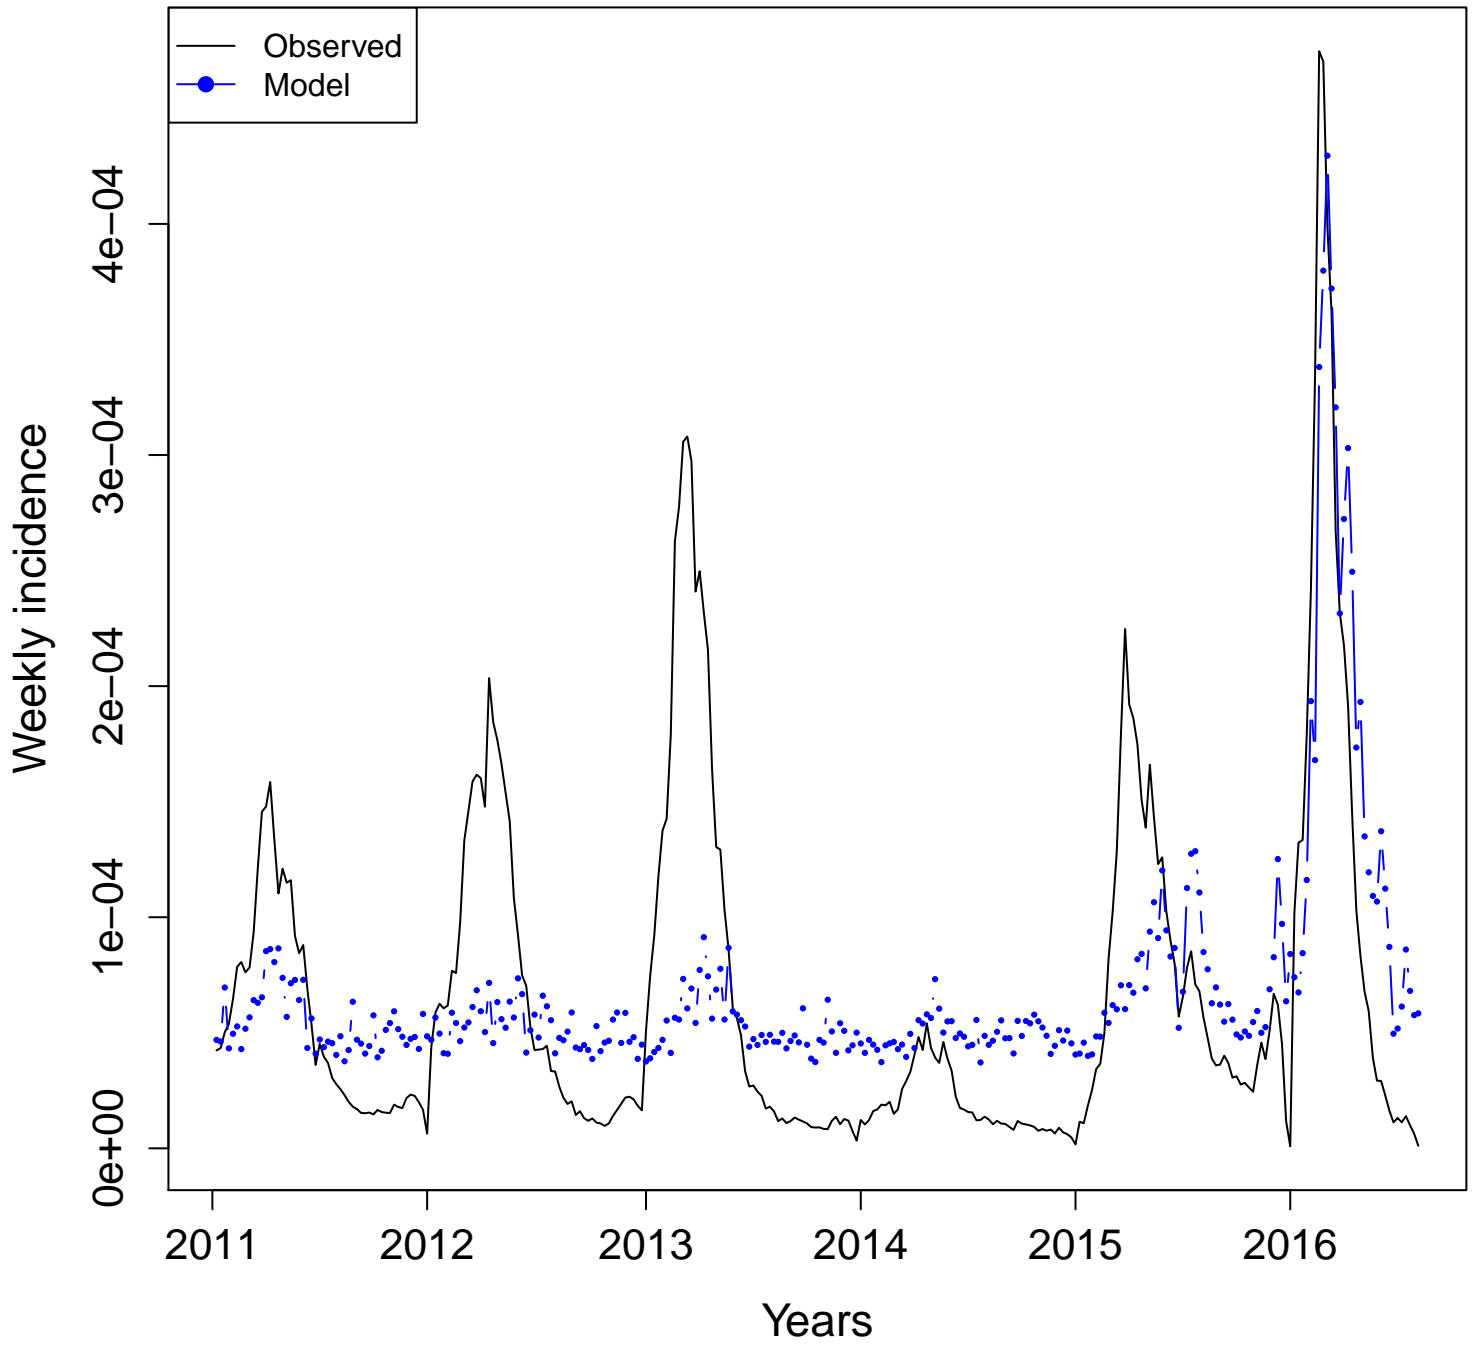

# BA- mosquito

Adj. R squared = 0.4125

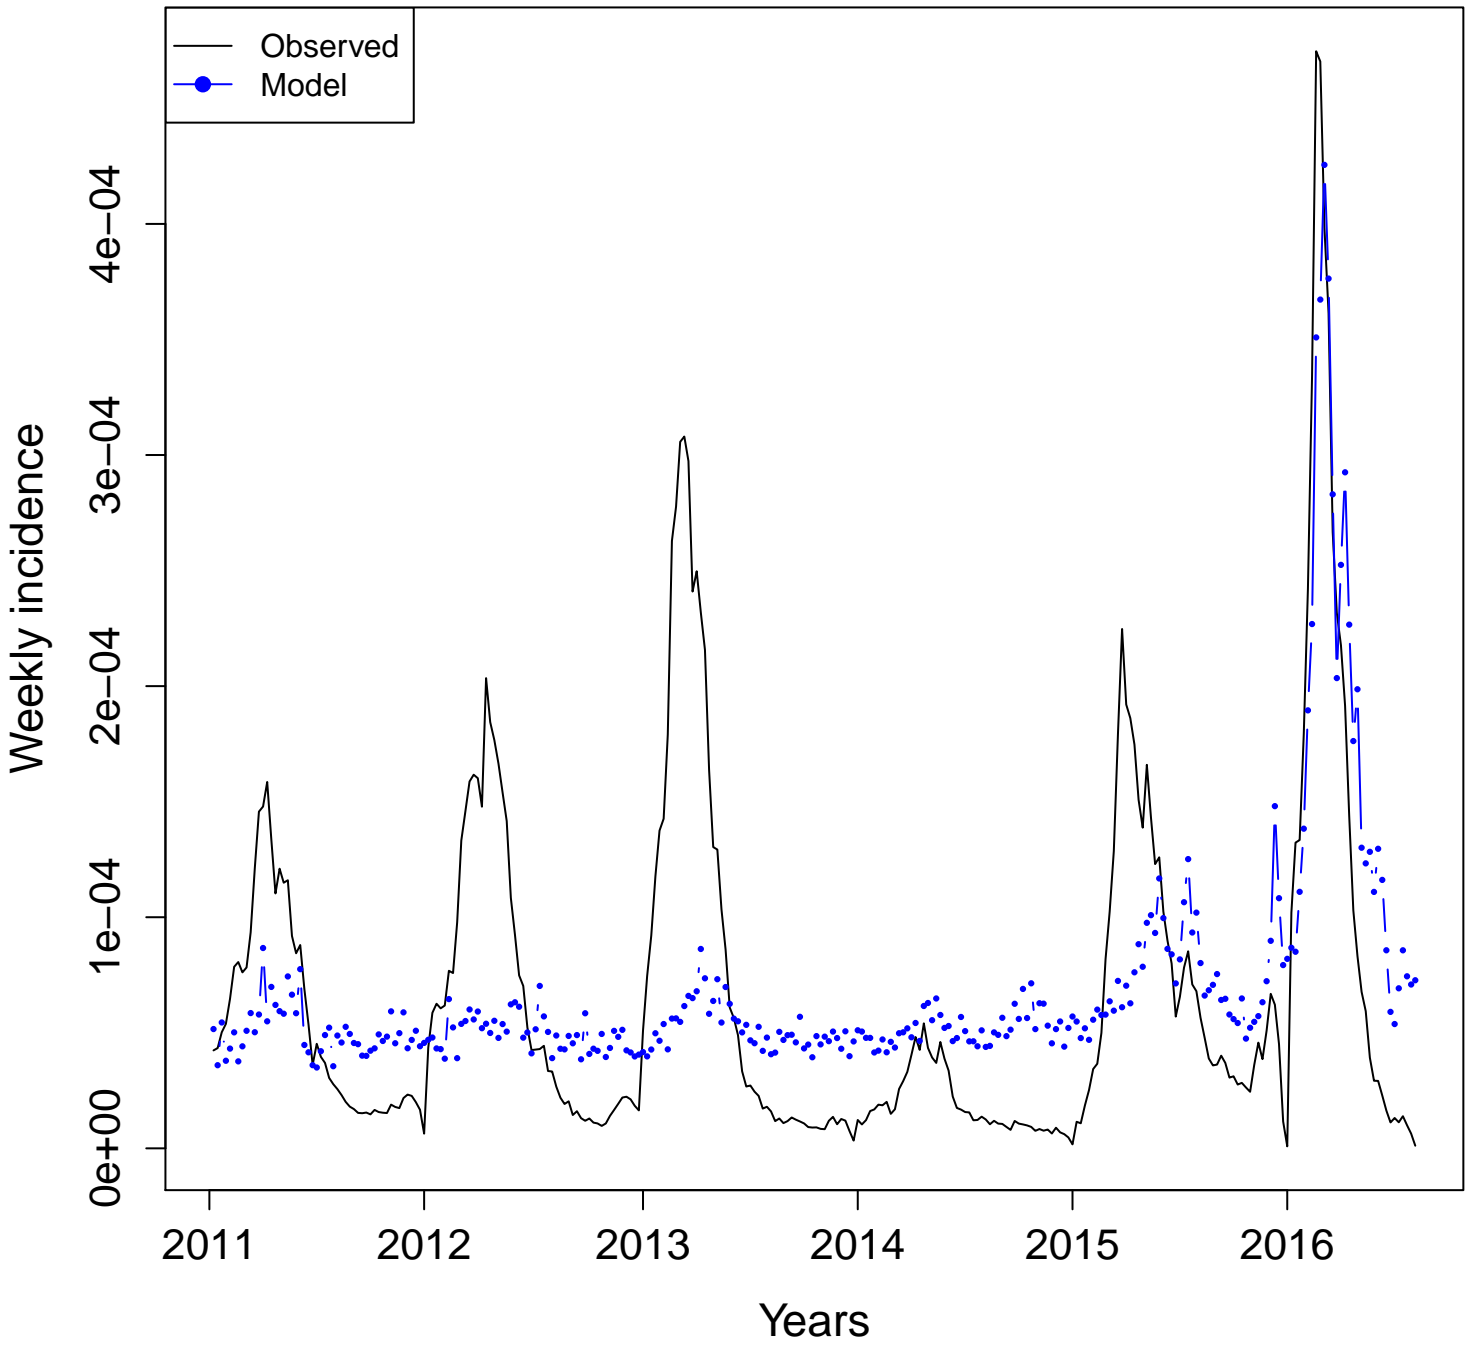

**BA- sintomas.da.dengue**  
**Adj. R squared = 0.55**

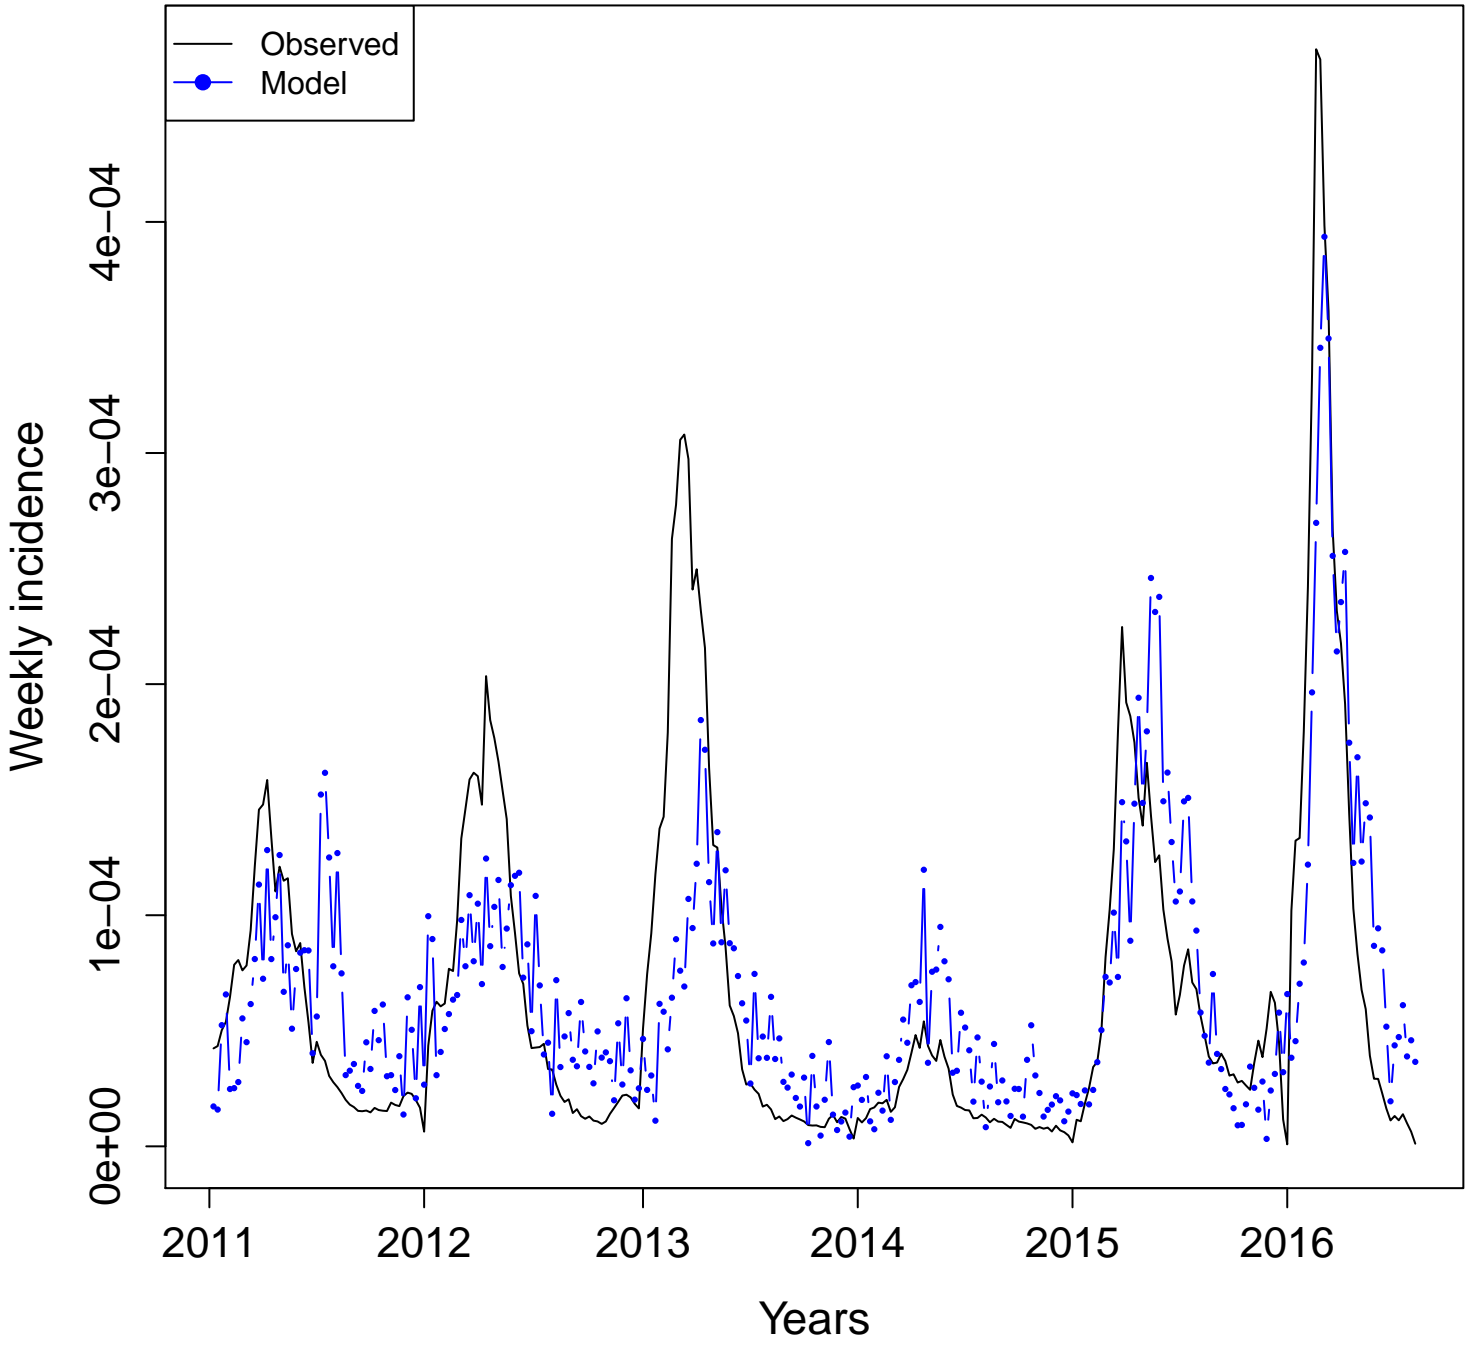

## Ceará (CE)

# Dengue incidence vs. Google Health Trends (2011–2016)

### Definitions:

- **Combined terms:**
  - **All:** model with all the available terms.  $n$  = number of terms
  - **Four:** model with "dengue", "dengue sintomas", "aedes", and "mosquito".
  - **Uncorrelated:** model with non-correlated terms.  $n$  = number of uncorrelated terms
- **Individual terms:** Plots developed with one term at a time.
- Terms for all and uncorrelated models can be found in additional file 3.

**Combined terms**  
**Adjusted R squared**

**Ceará (CE)**

All  
(n = 10)

BR-CE  
Adj. R squared = 0.8389

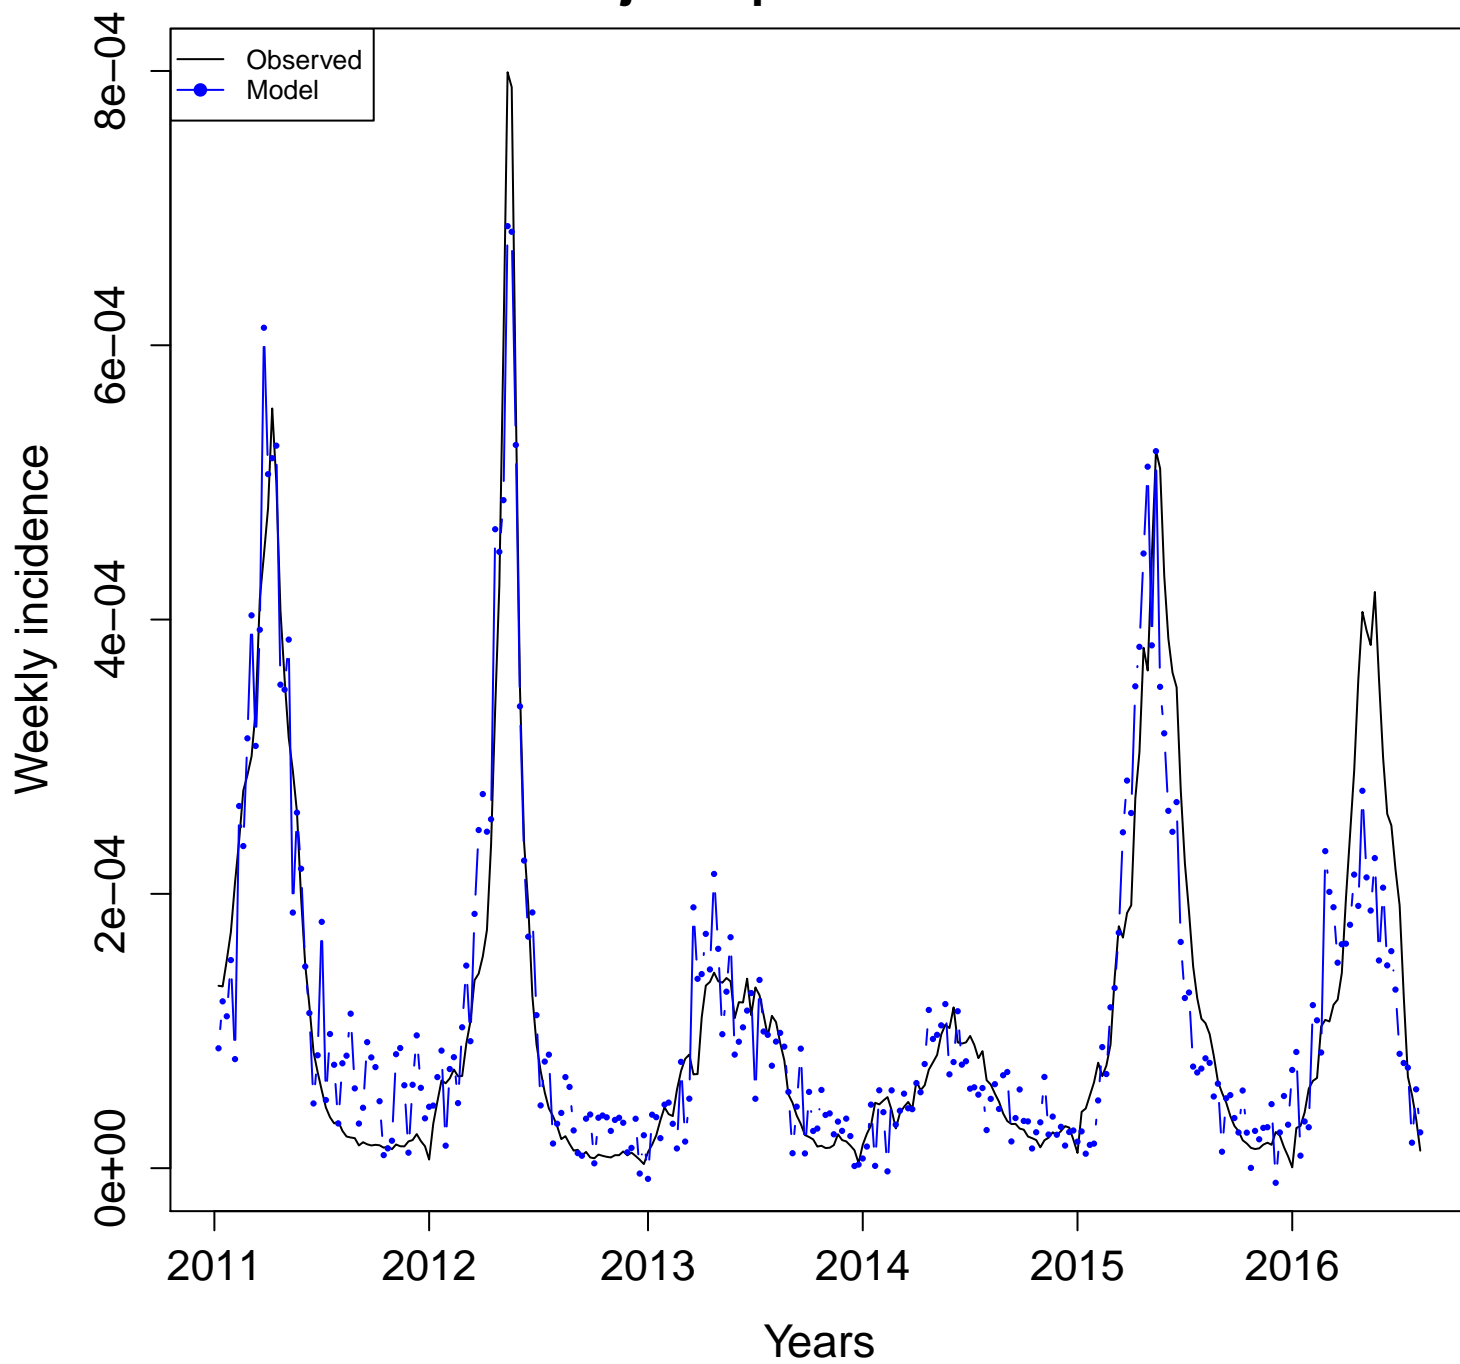

**BR-CE**  
**Adj. R squared = 0.8121**

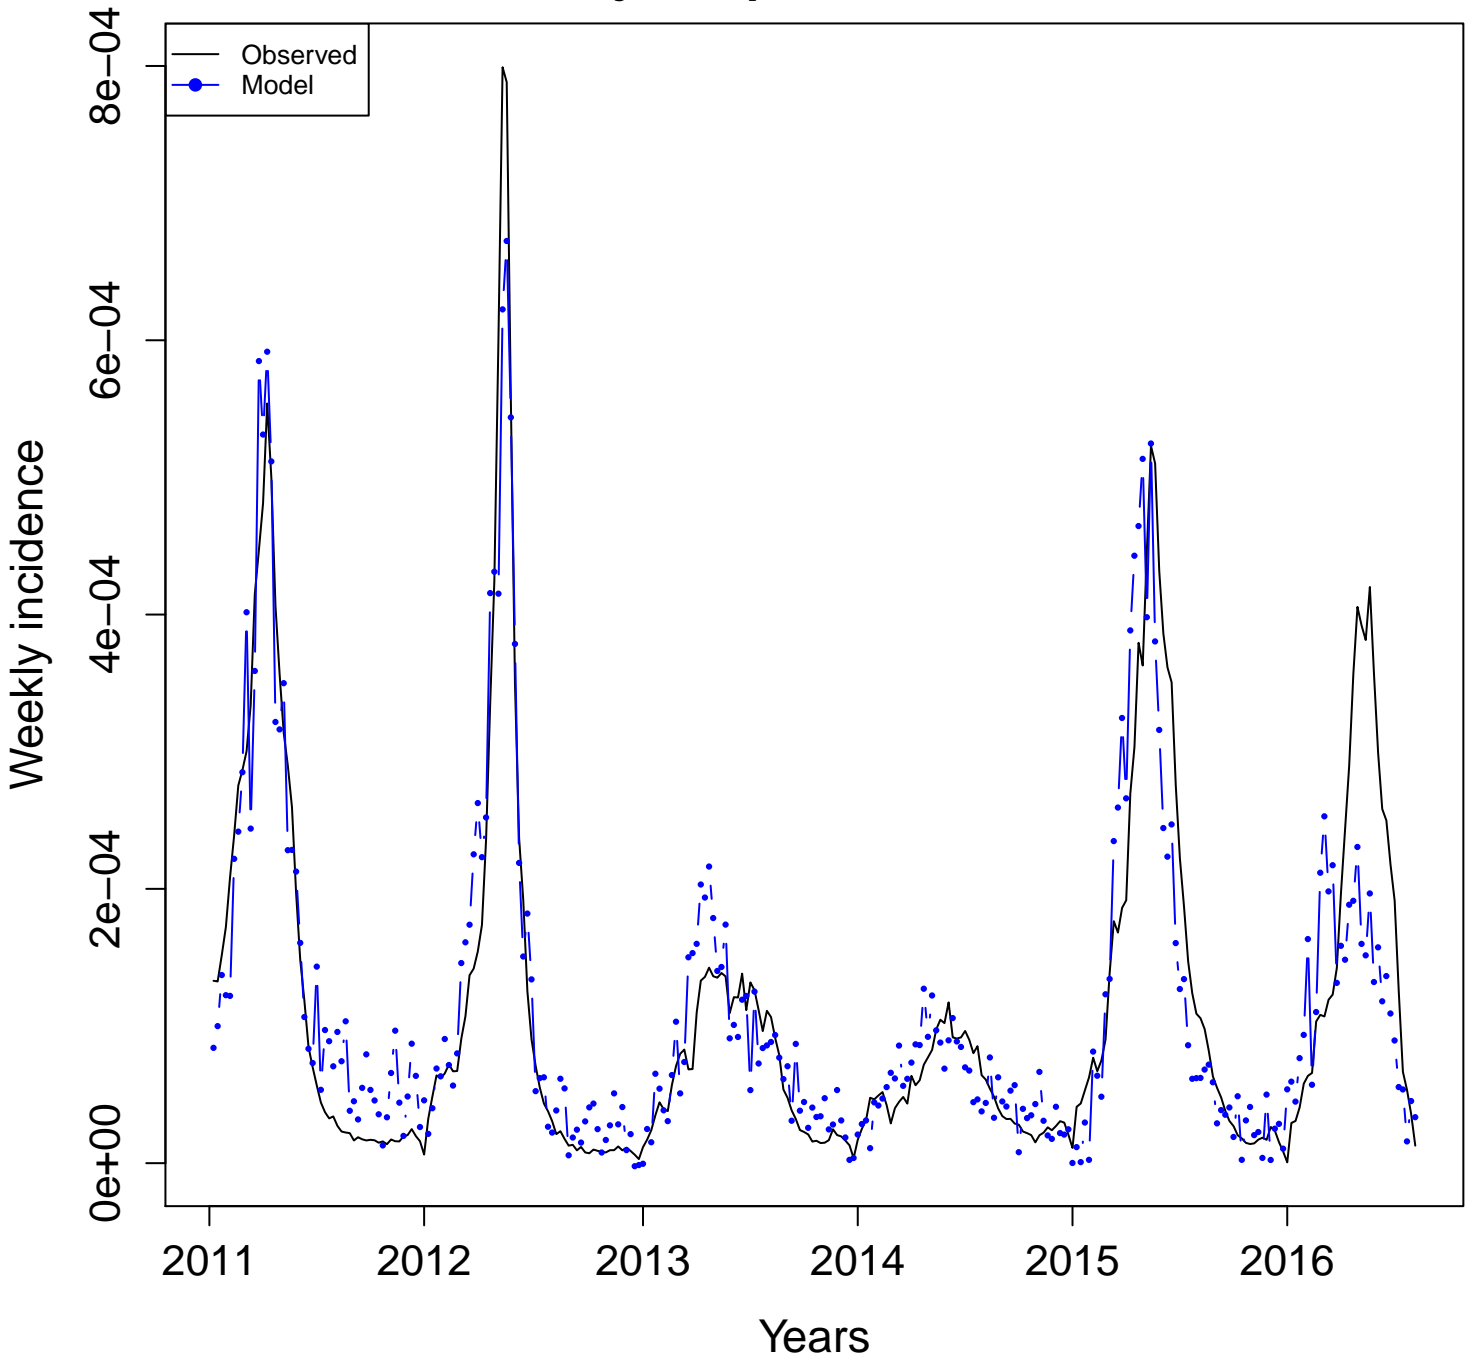

**Uncorrelated  
(n = 3)**

**BR-CE  
Adj. R squared = 0.7459**

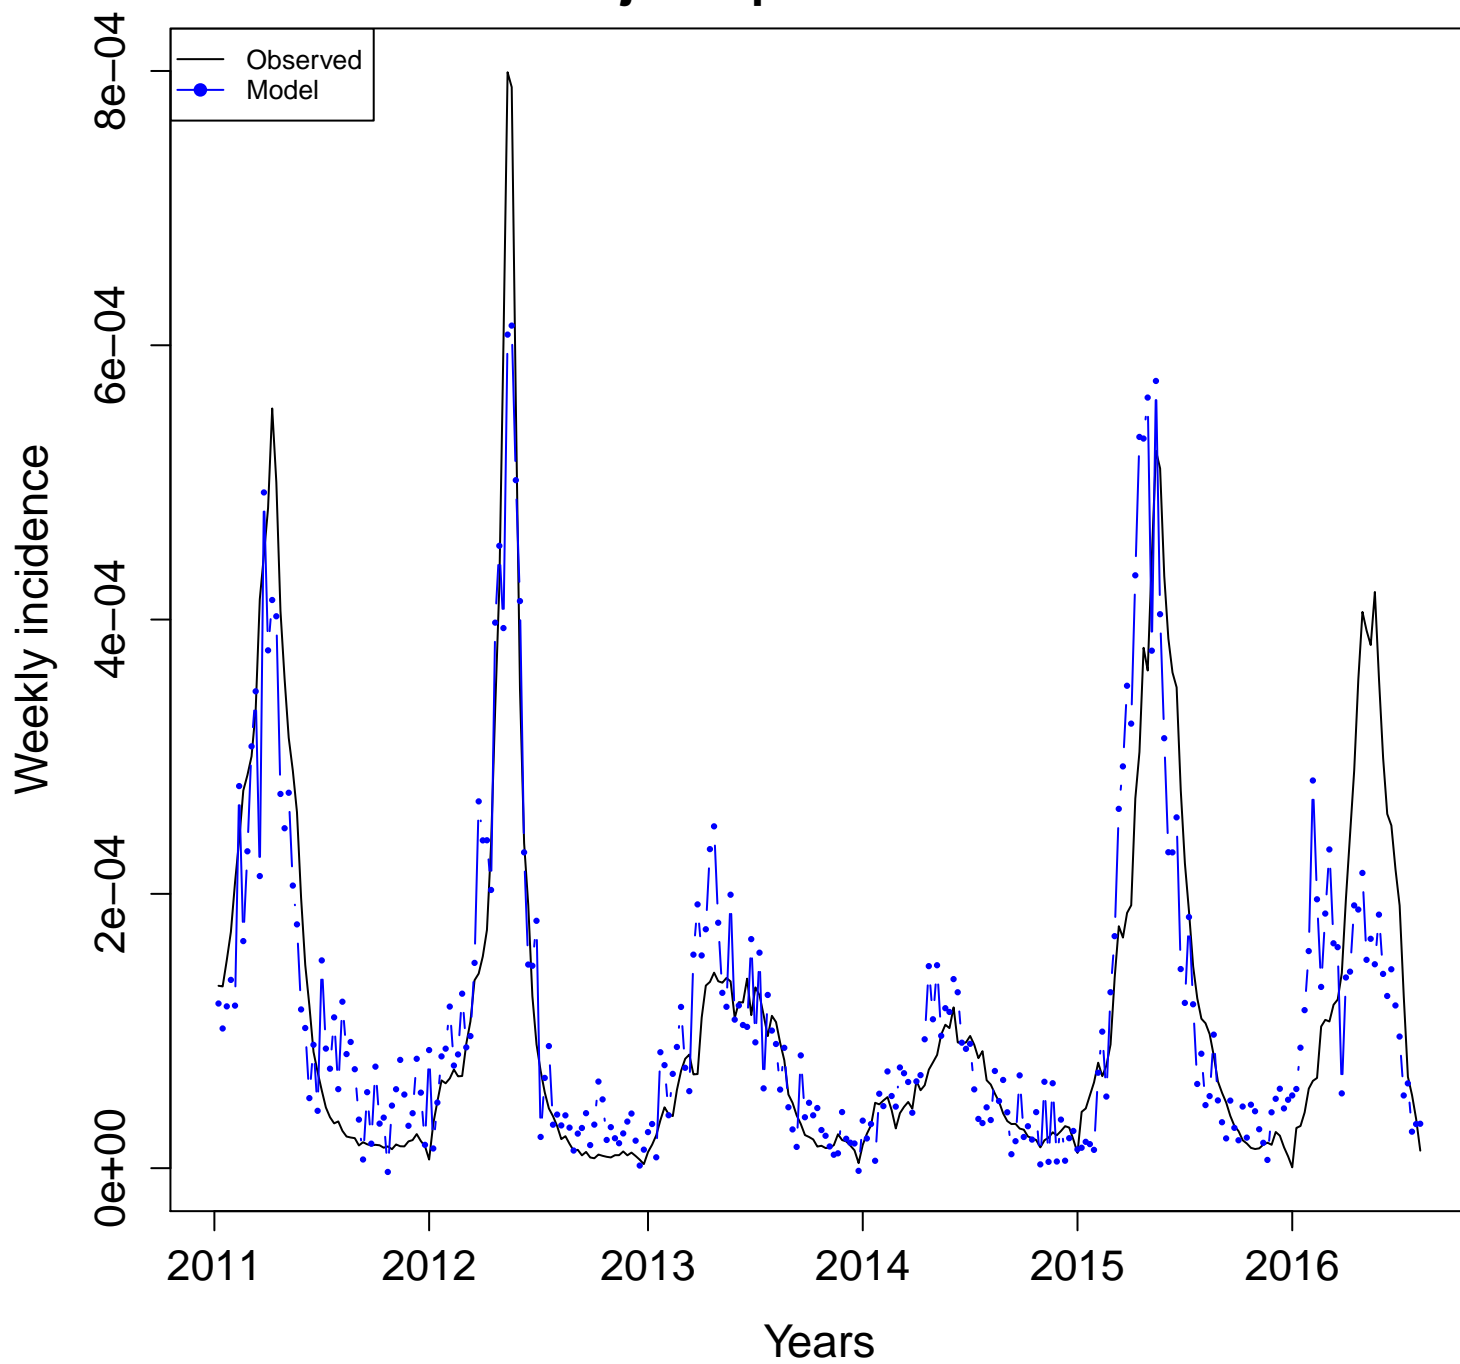



**Individual terms**  
**Adjusted R squared**

**Ceará (CE)**

**CE- aedes.aegypti**  
**Adj. R squared = 0.0125**

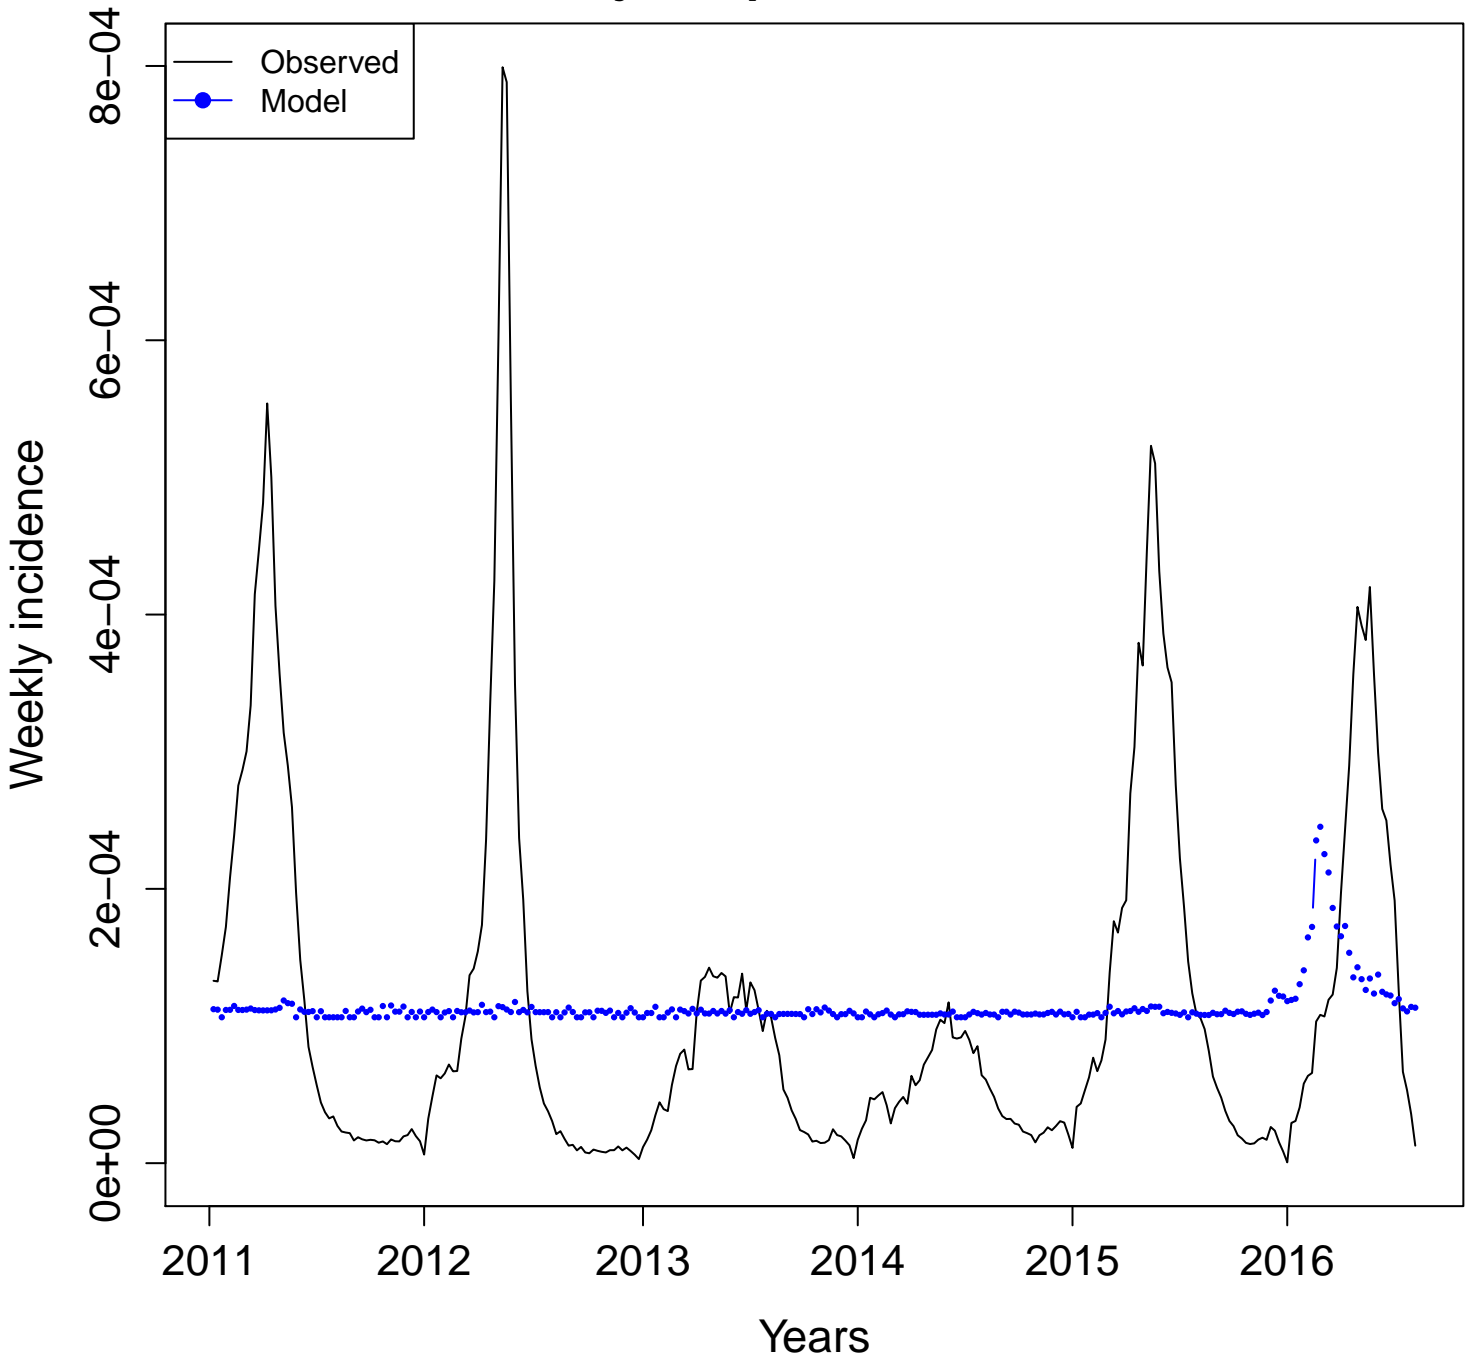

**CE- aedes**  
**Adj. R squared = 0.0183**

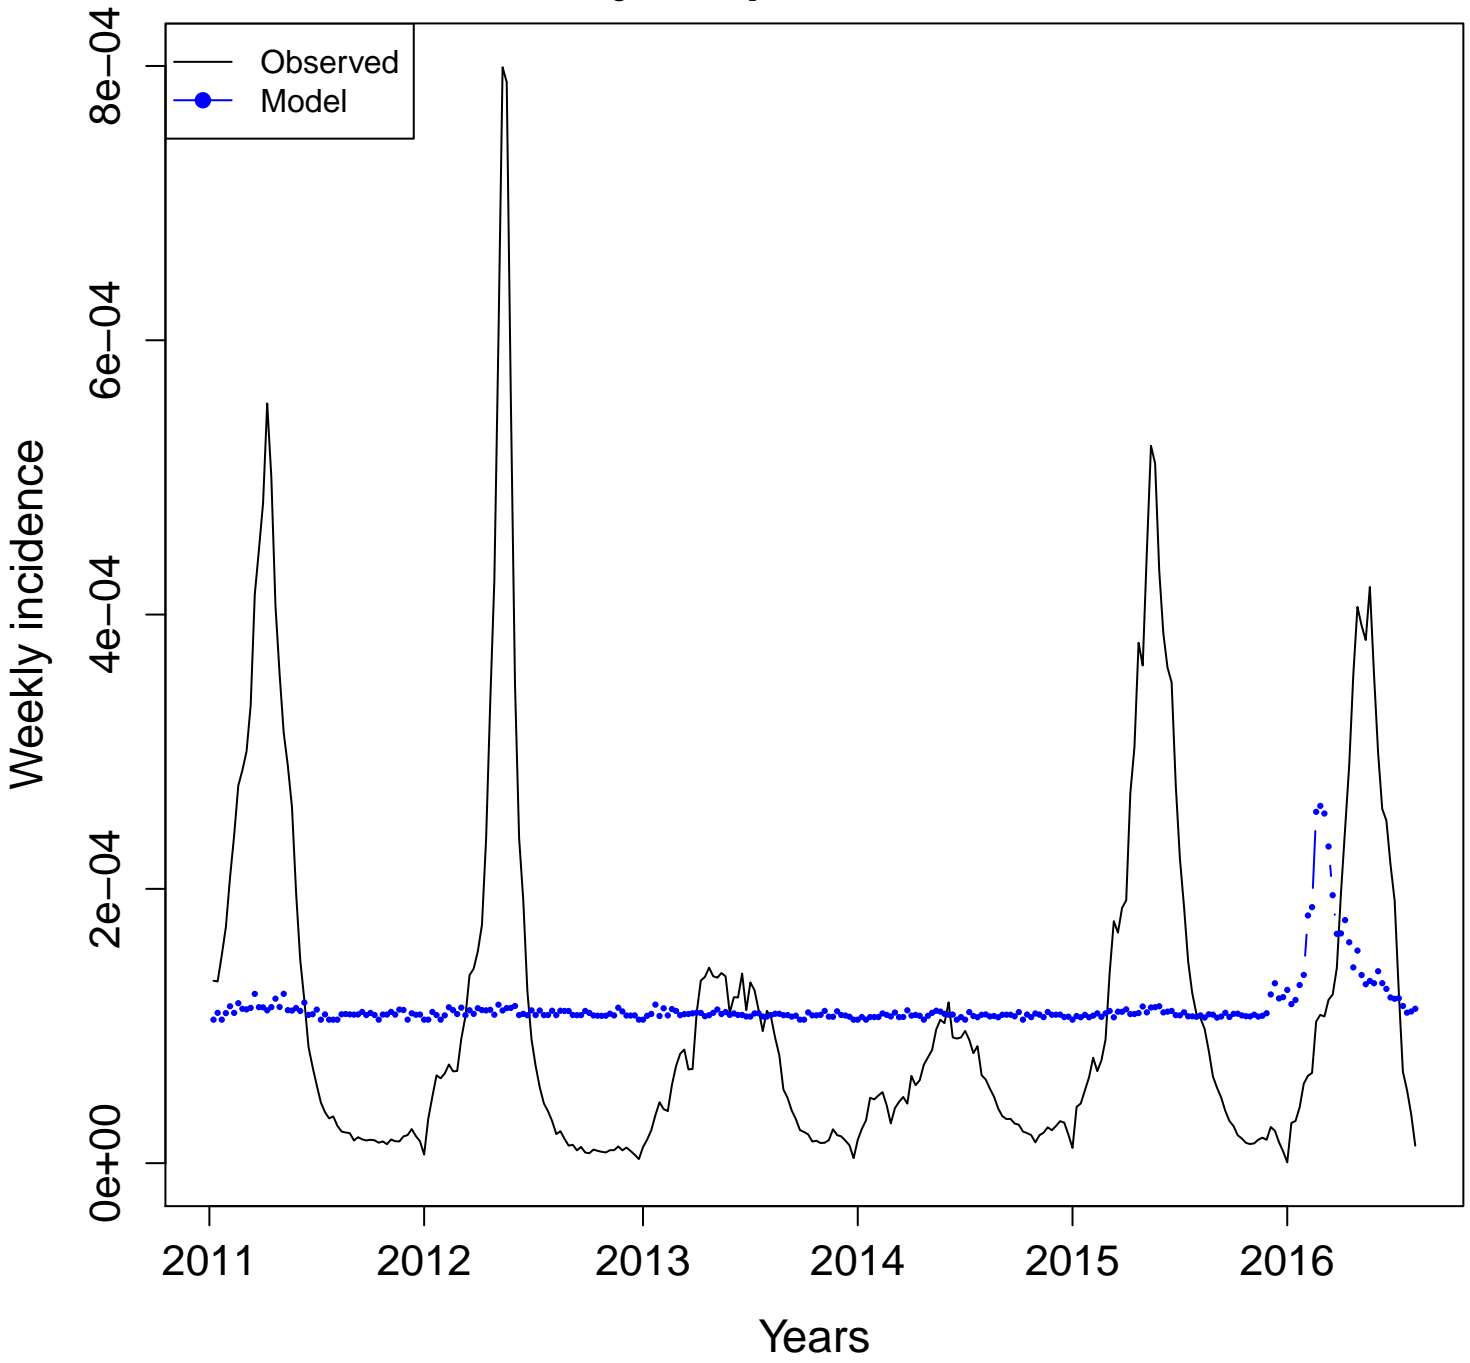

**CE- aegypti**  
**Adj. R squared = 0.0118**

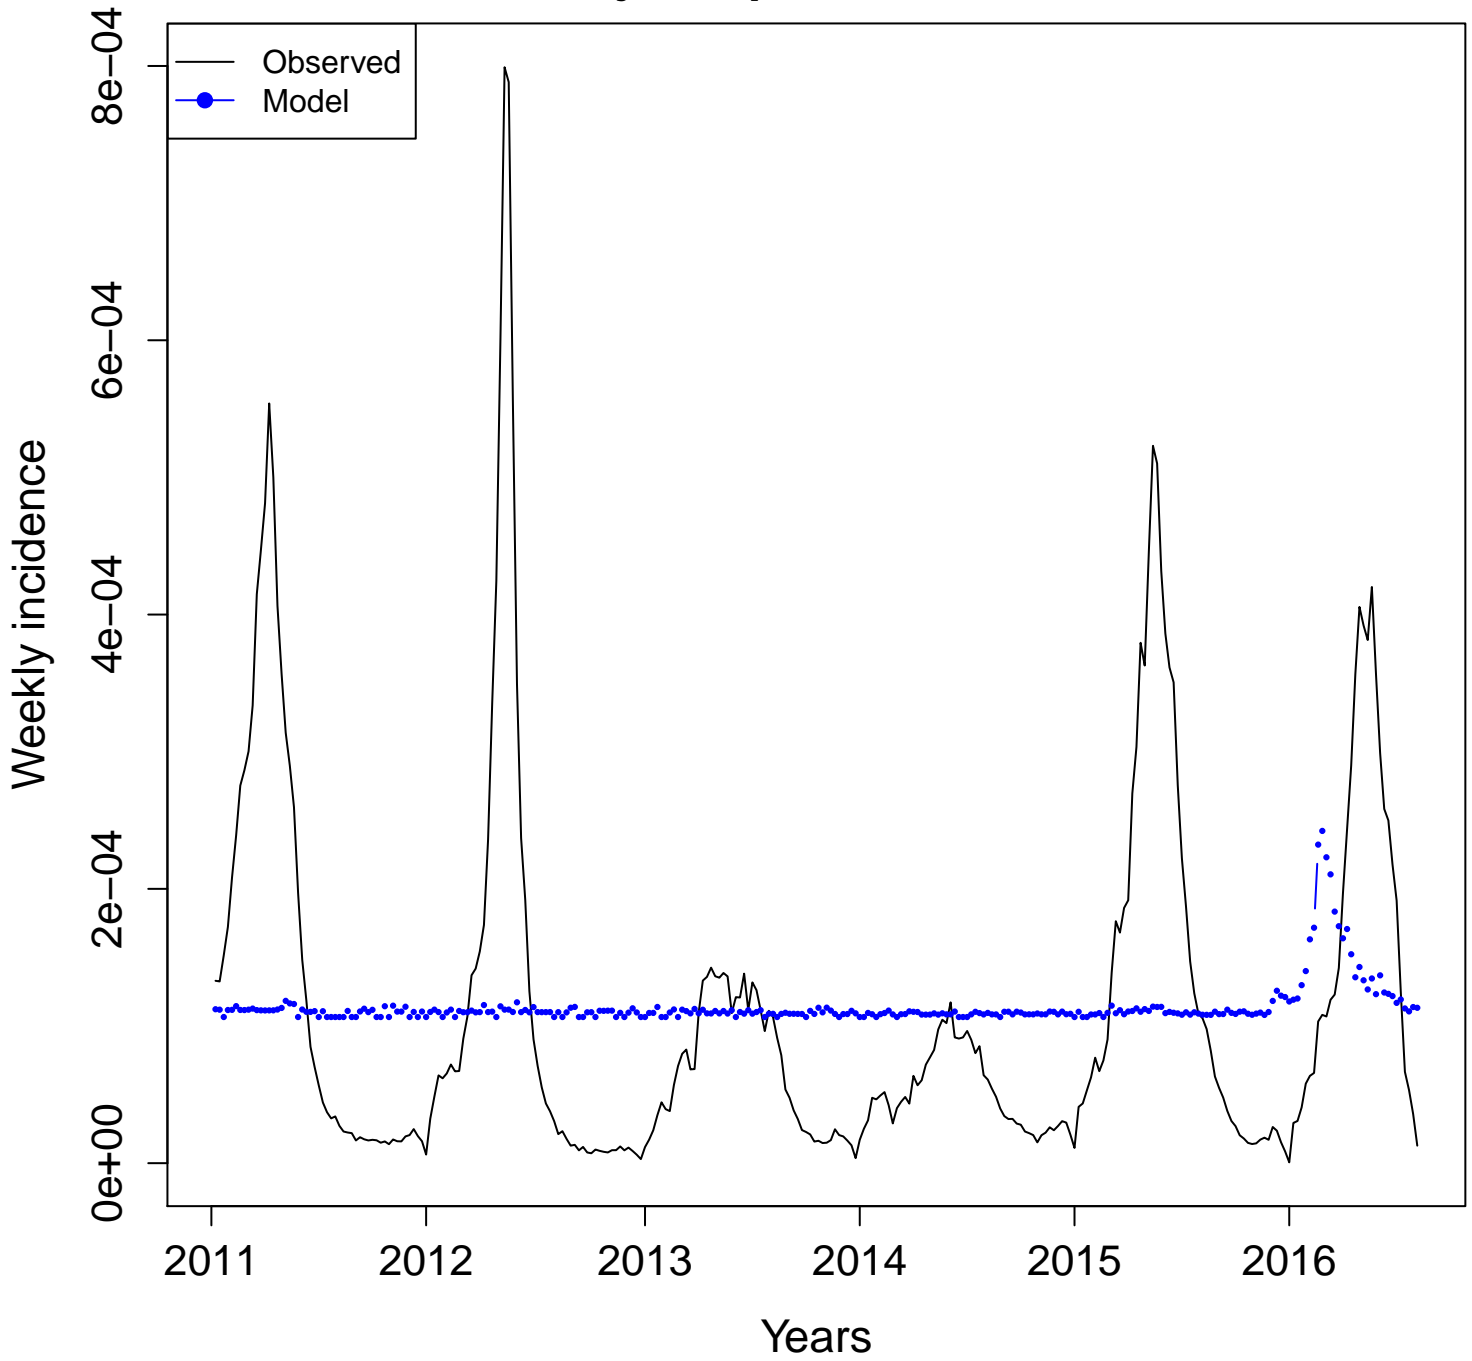

**CE- dengue.fever**  
**Adj. R squared = 0.0292**

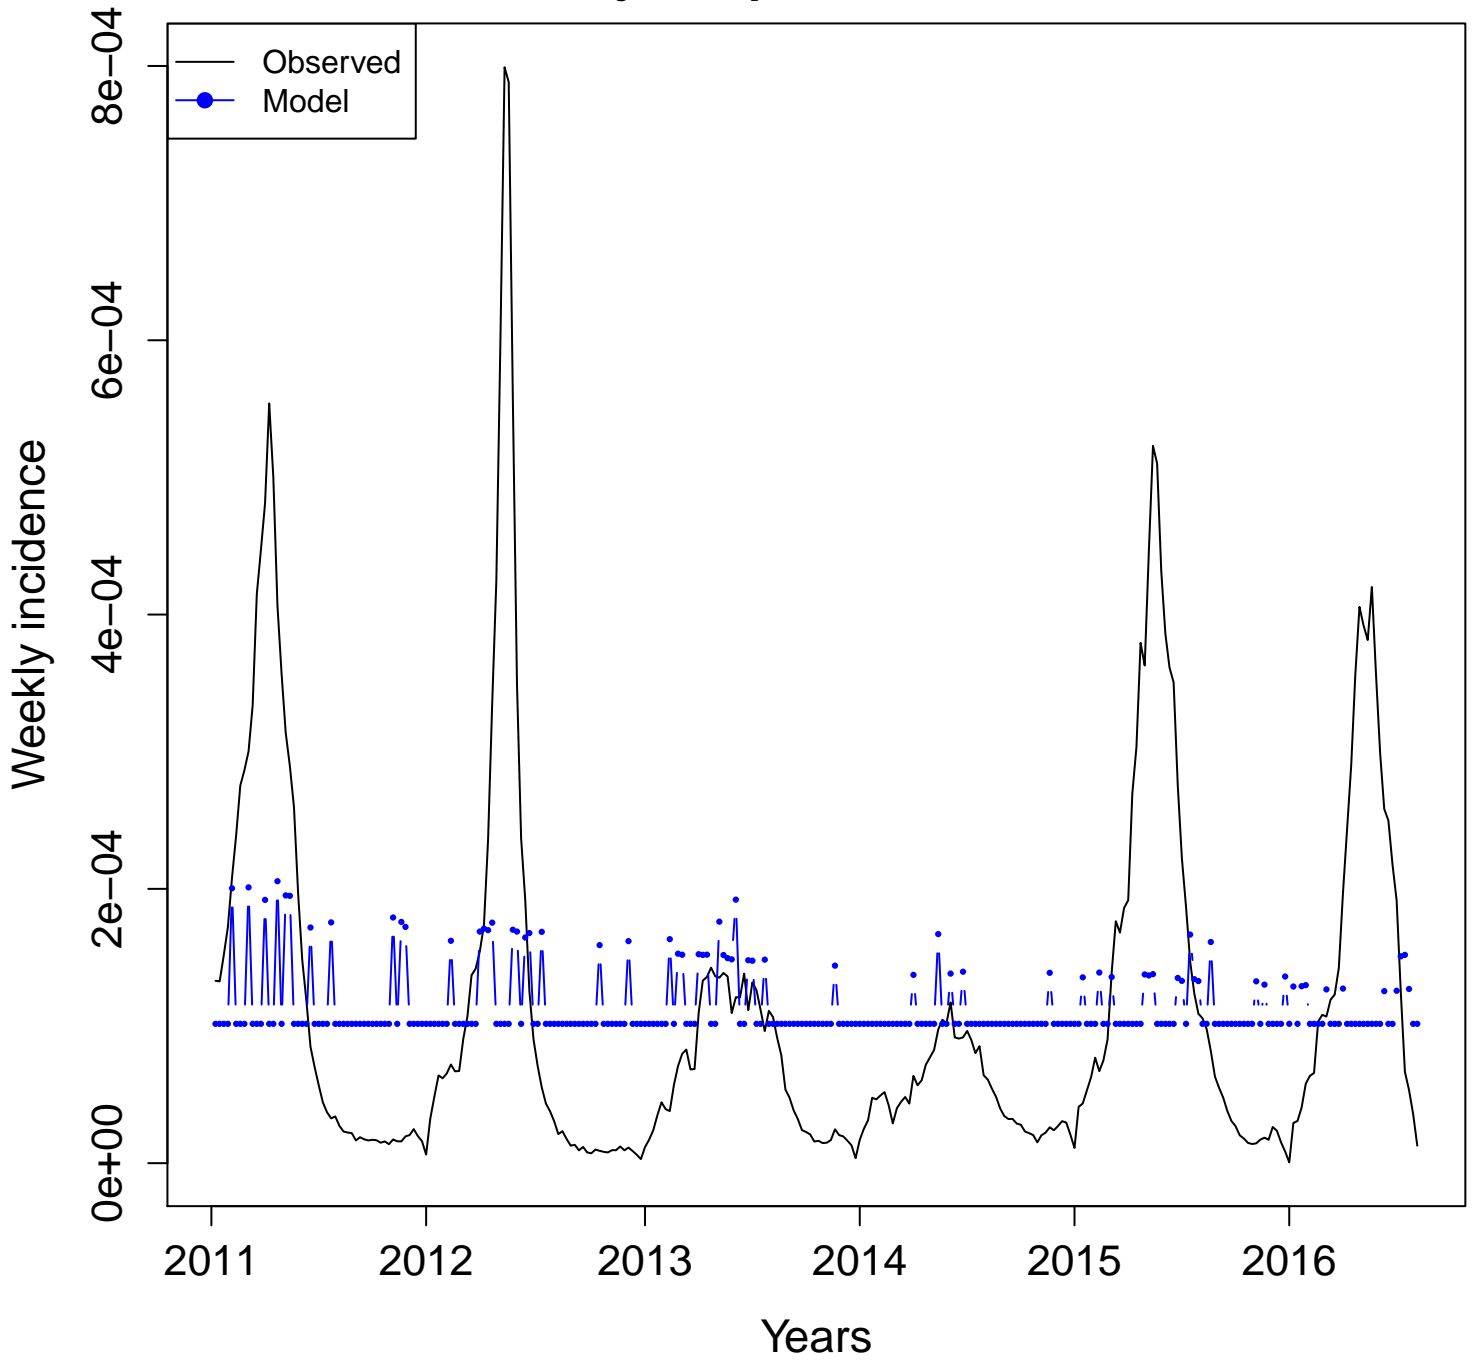

# CE- dengue

Adj. R squared = 0.5385

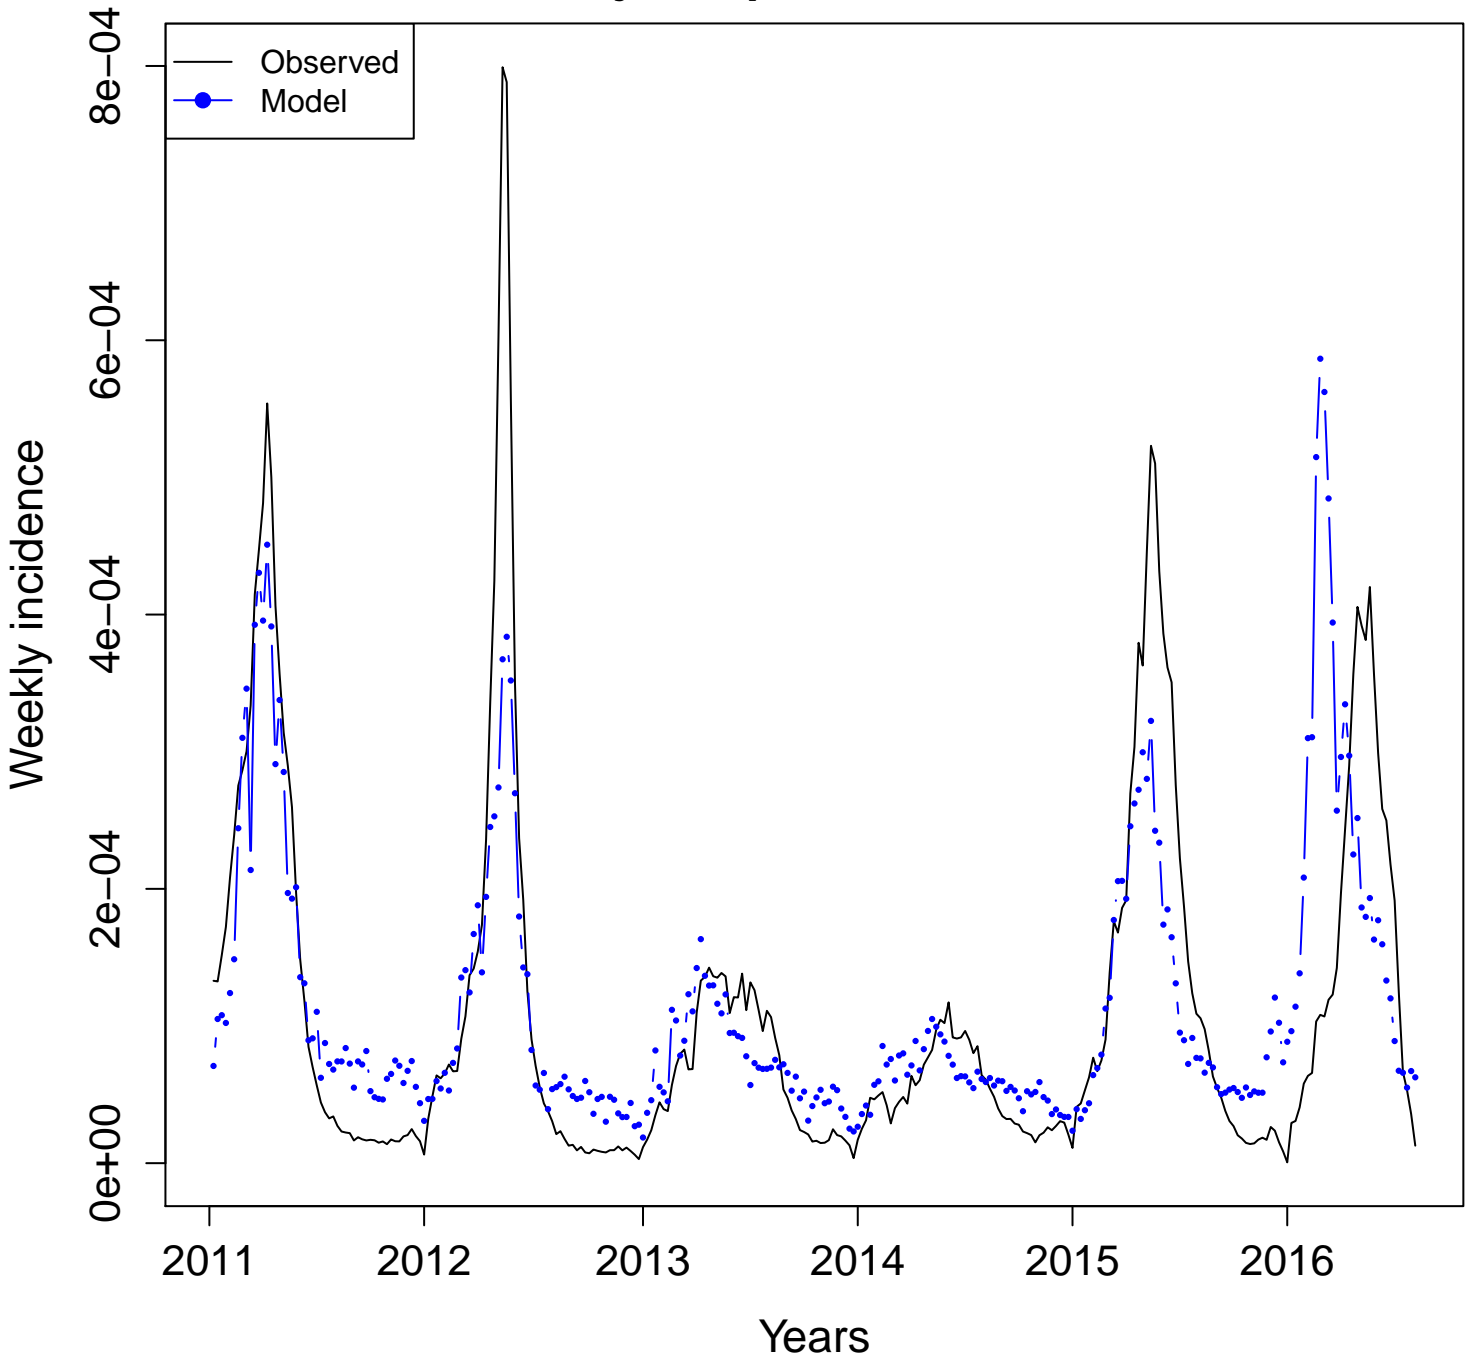

# CE- dengue.sintomas

Adj. R squared = 0.6805

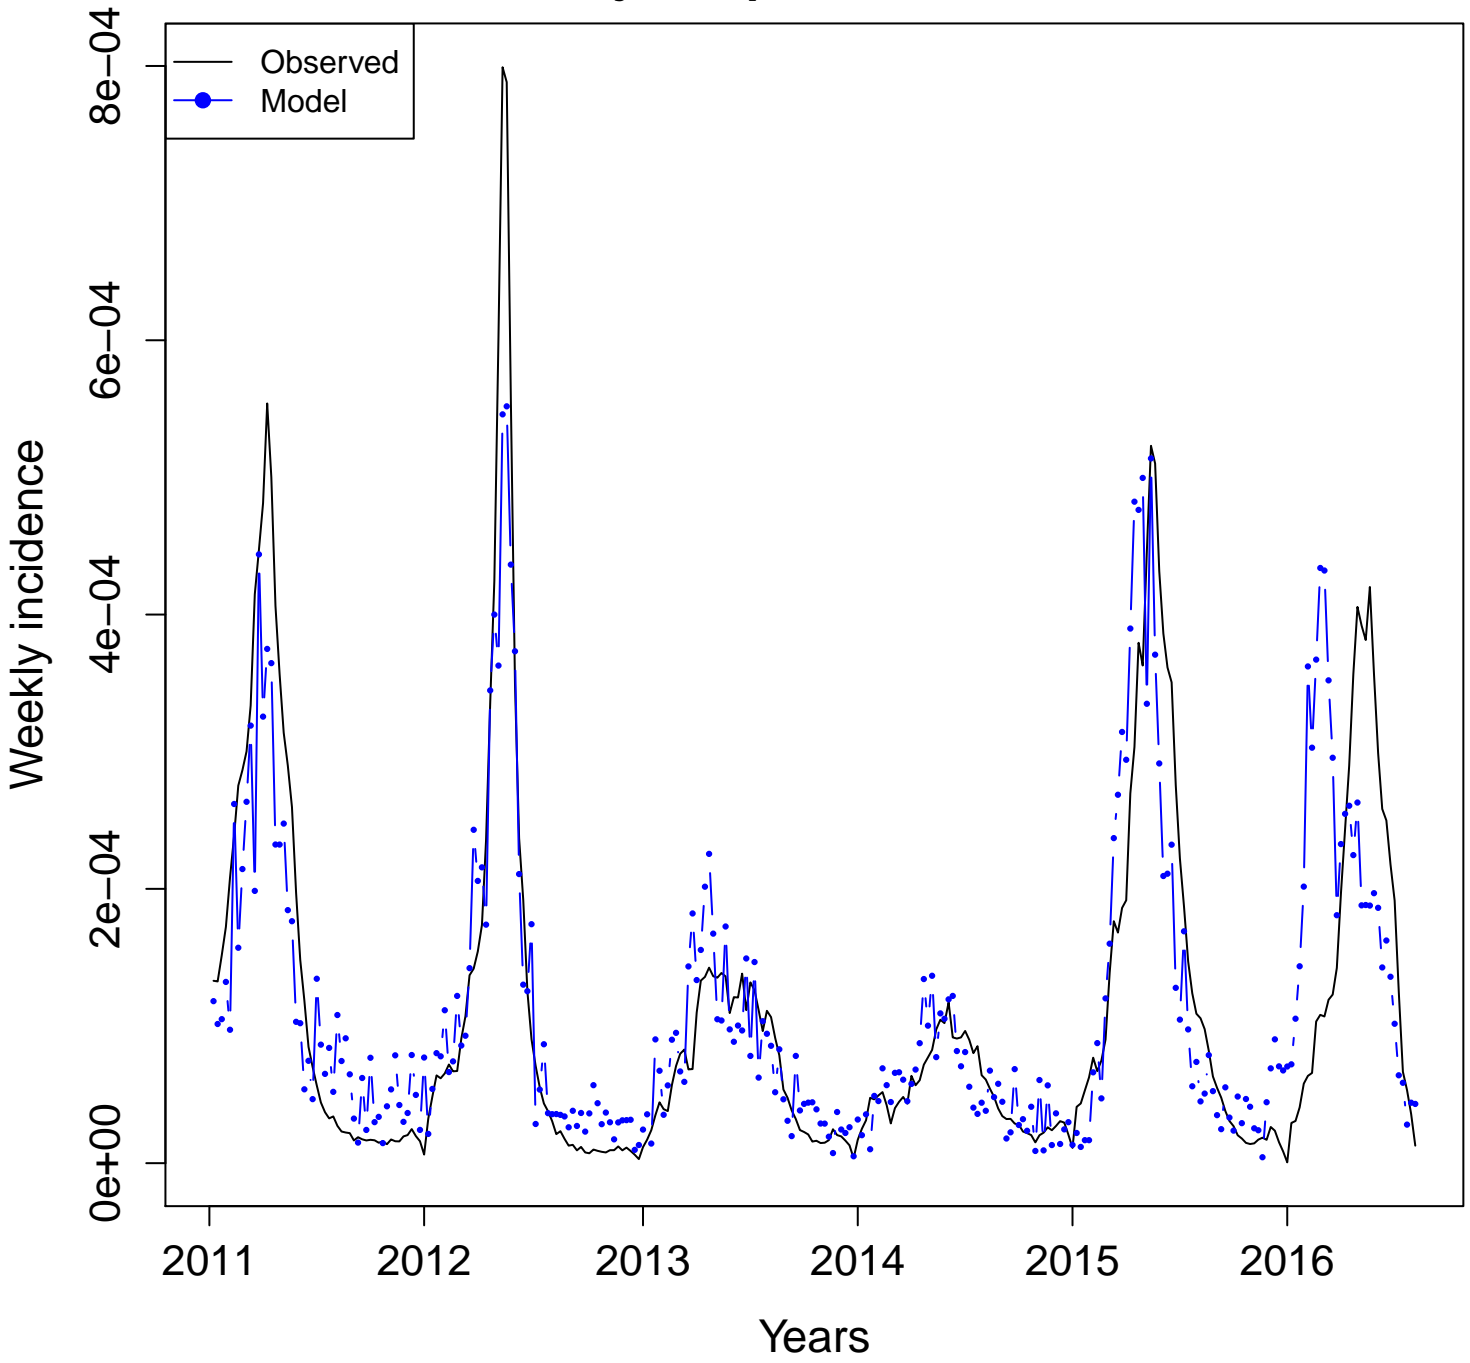

# CE- dengue.virus

Adj. R squared = 0.1077

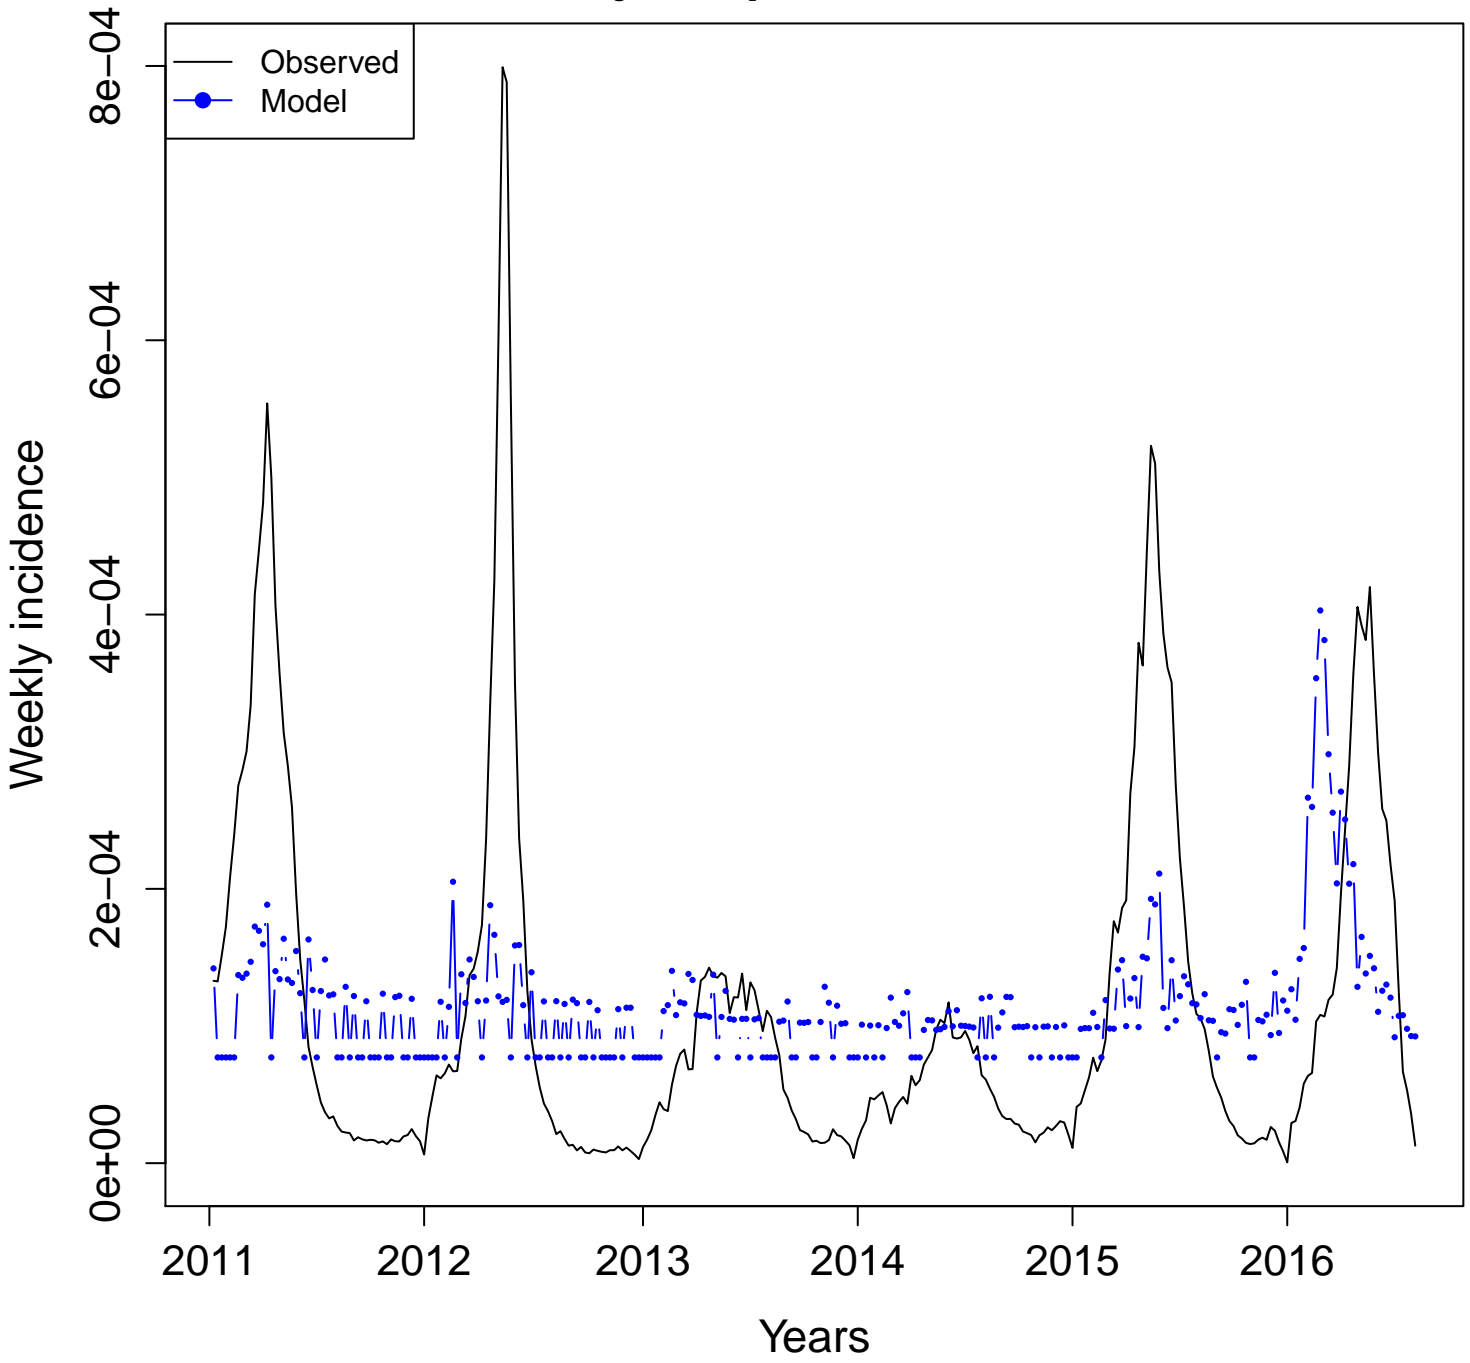



**CE- mosquito.dengue**  
**Adj. R squared = 0.0959**

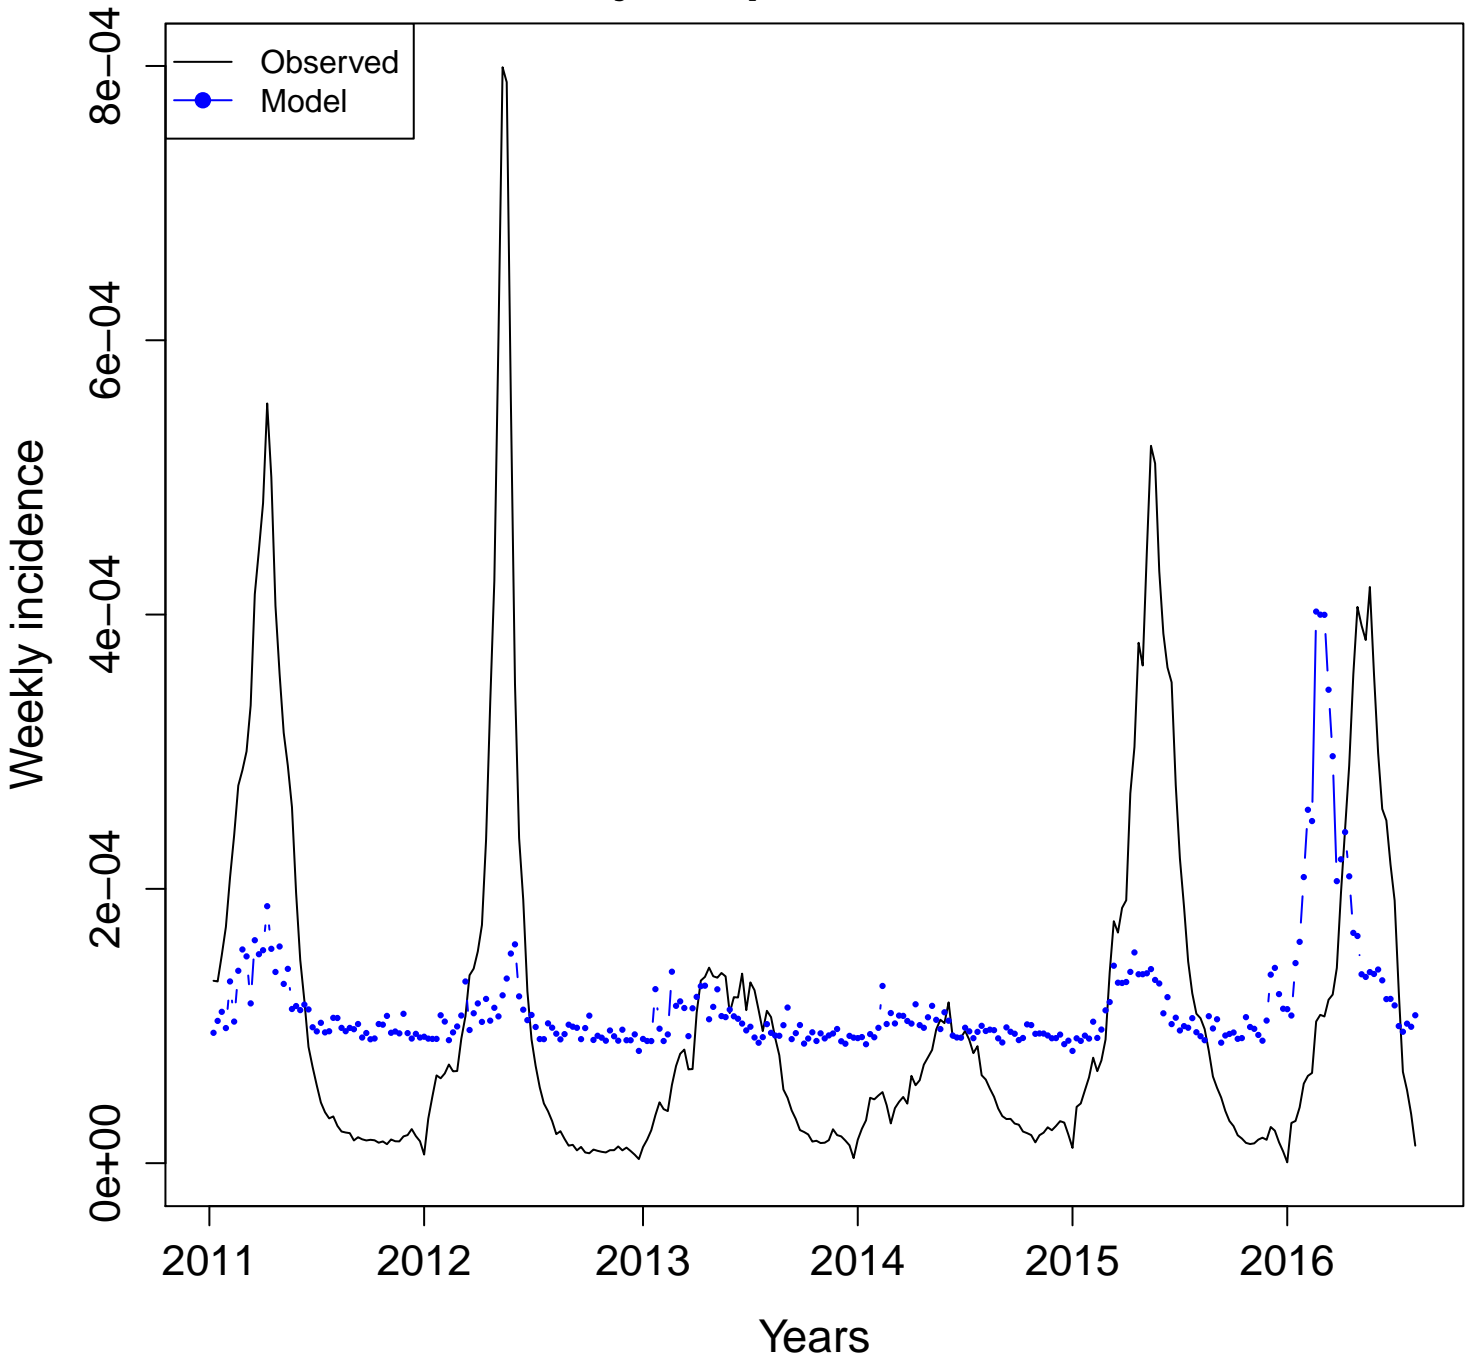

# CE- mosquito

Adj. R squared = 0.0701

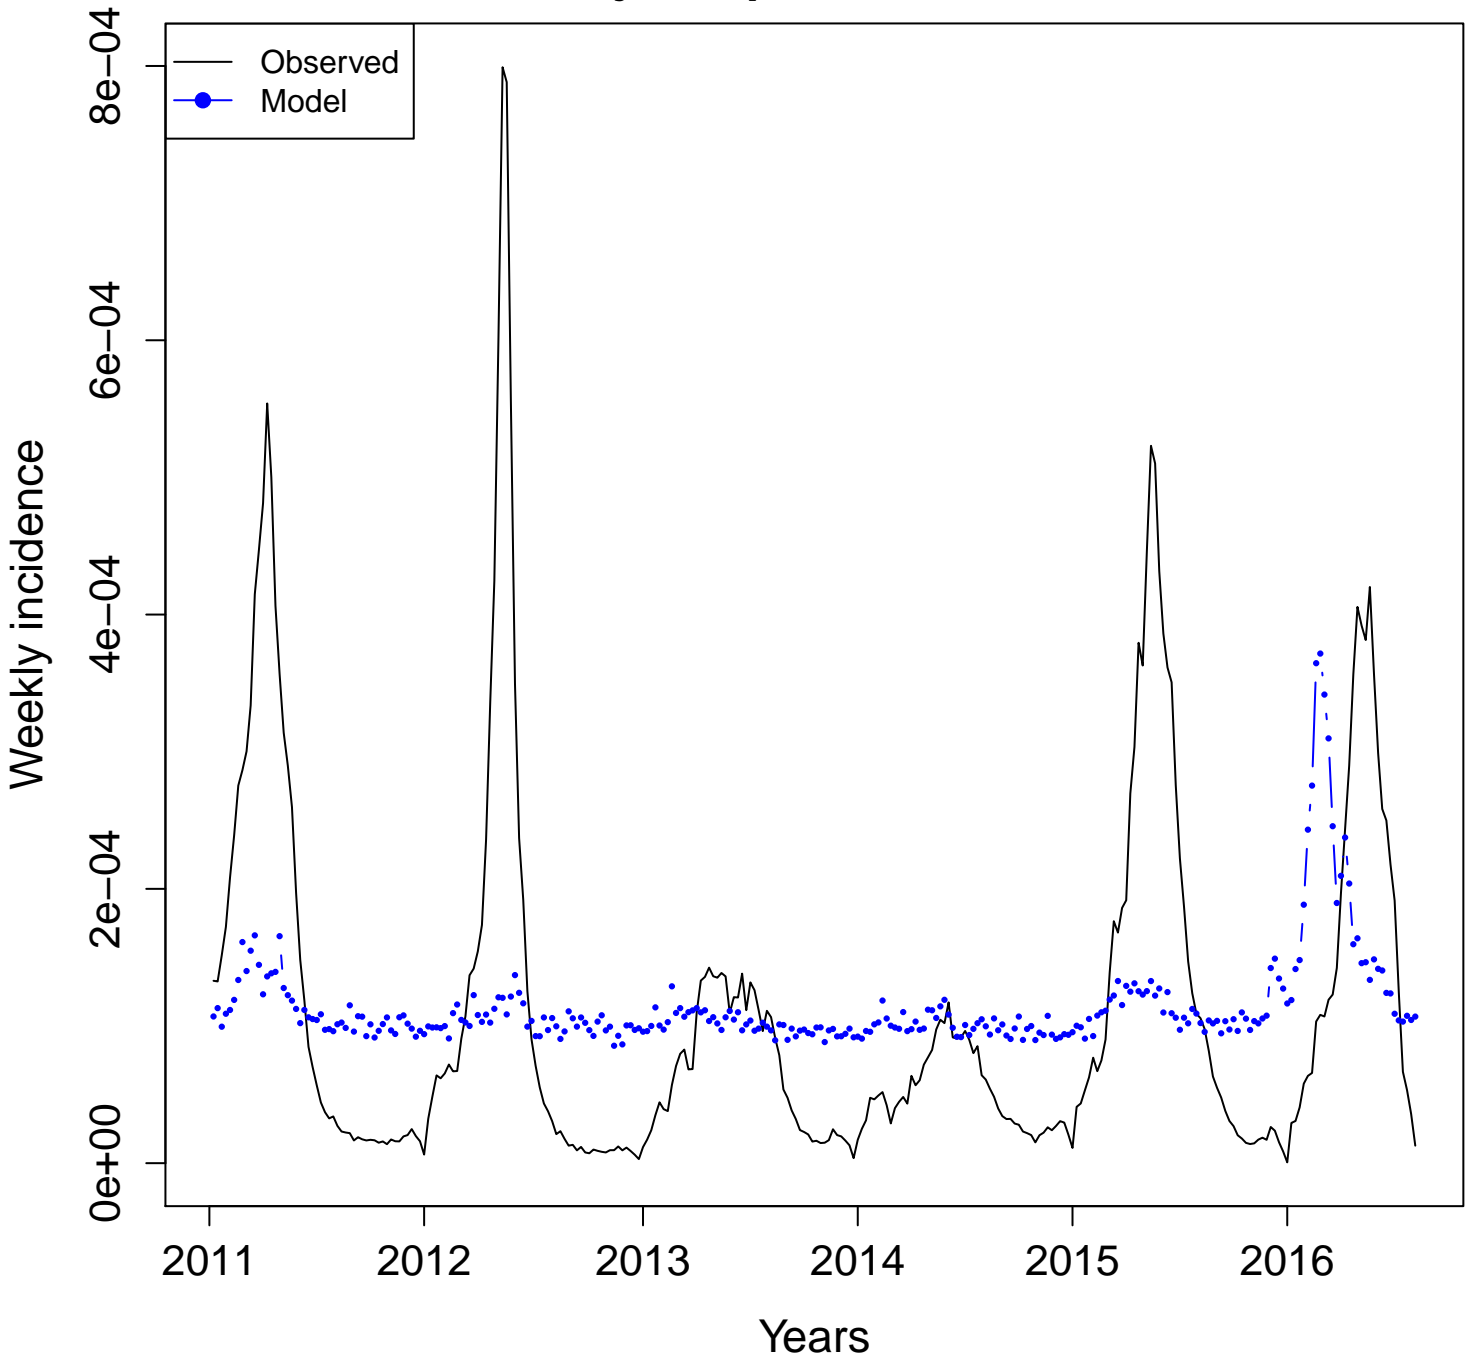

**CE- sintomas.da.dengue**  
**Adj. R squared = 0.6182**

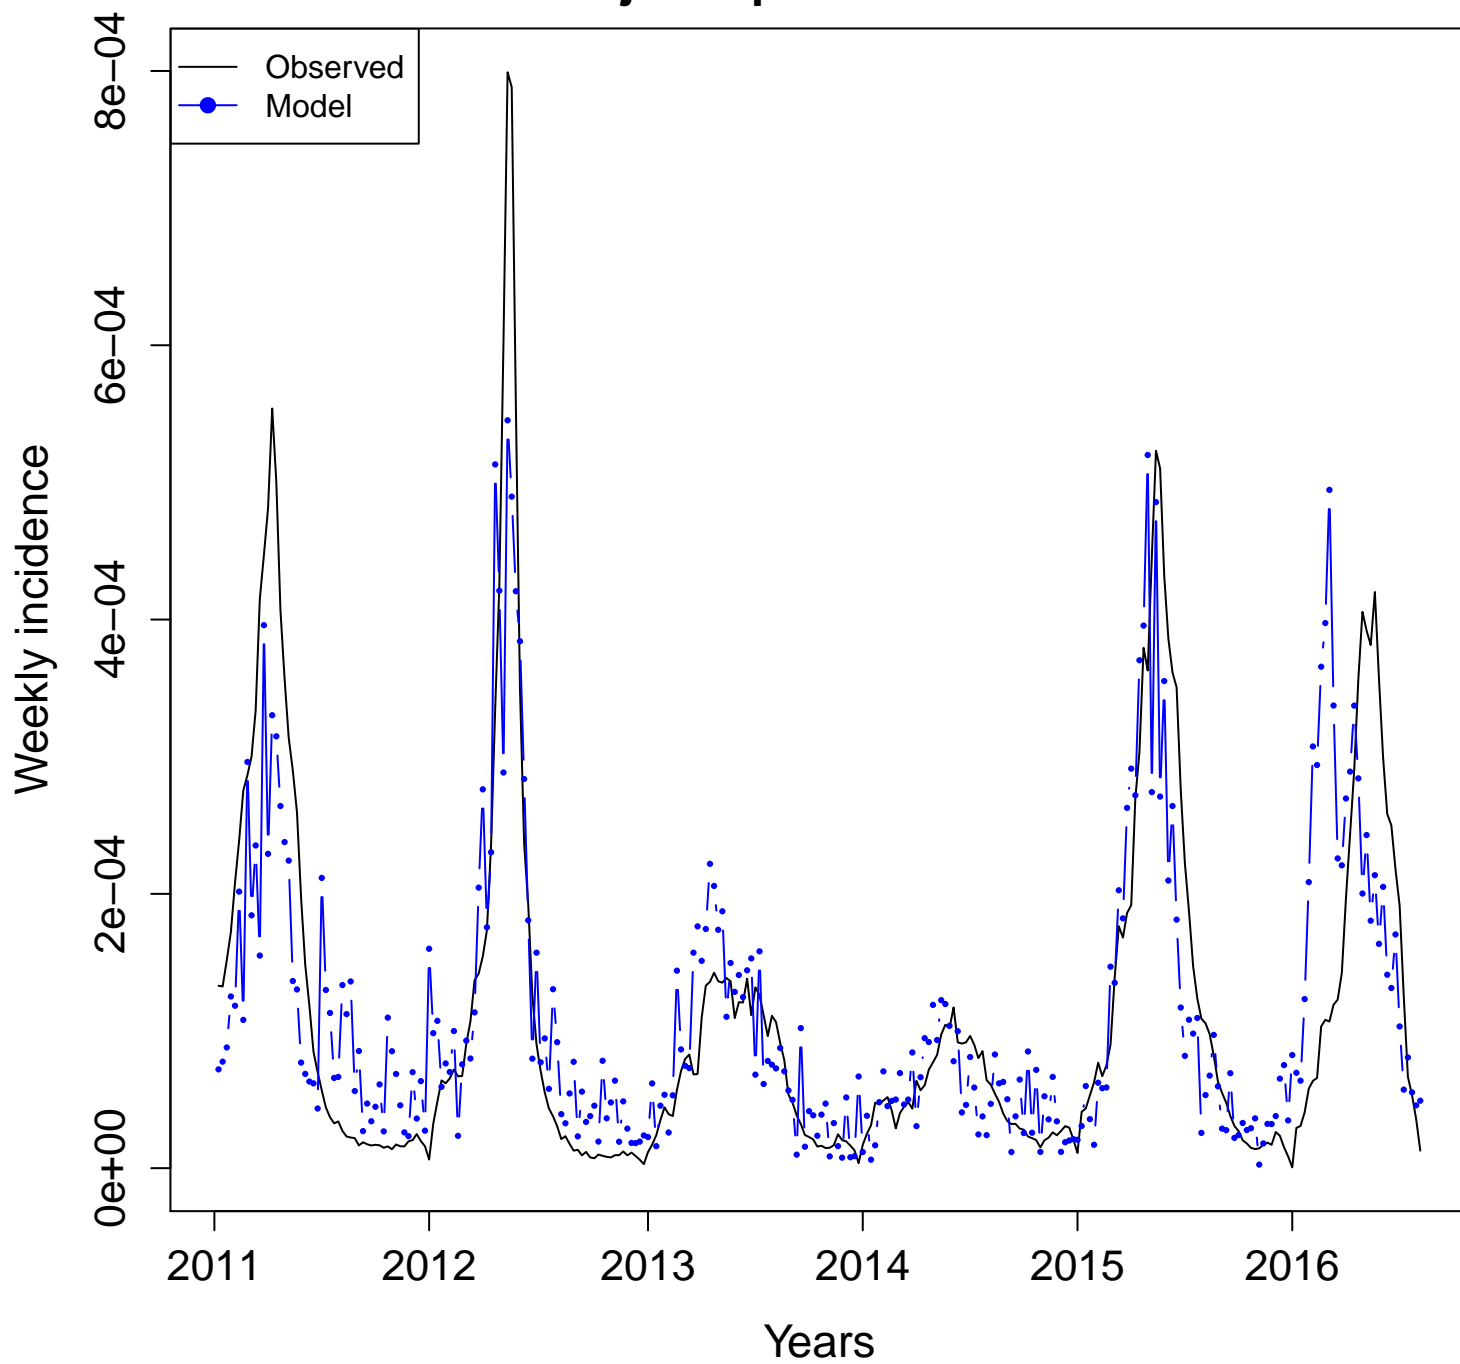

## Distrito Federal (DF)

# Dengue incidence vs. Google Health Trends (2014–2016)

### Definitions:

- **Combined terms:**
  - **All:** model with all the available terms.  $n$  = number of terms
  - **Four:** model with "dengue", "dengue sintomas", "aedes", and "mosquito".
  - **Uncorrelated:** model with non-correlated terms.  $n$  = number of uncorrelated terms
- **Individual terms:** Plots developed with one term at a time.
- Terms for all and uncorrelated models can be found in additional file 3.

**Combined terms  
Adjusted R Squared**

**Distrito Federal (DF)**

**All terms  
(n = 10)**

**BR-DF  
Adj. R squared = 0.8289458**

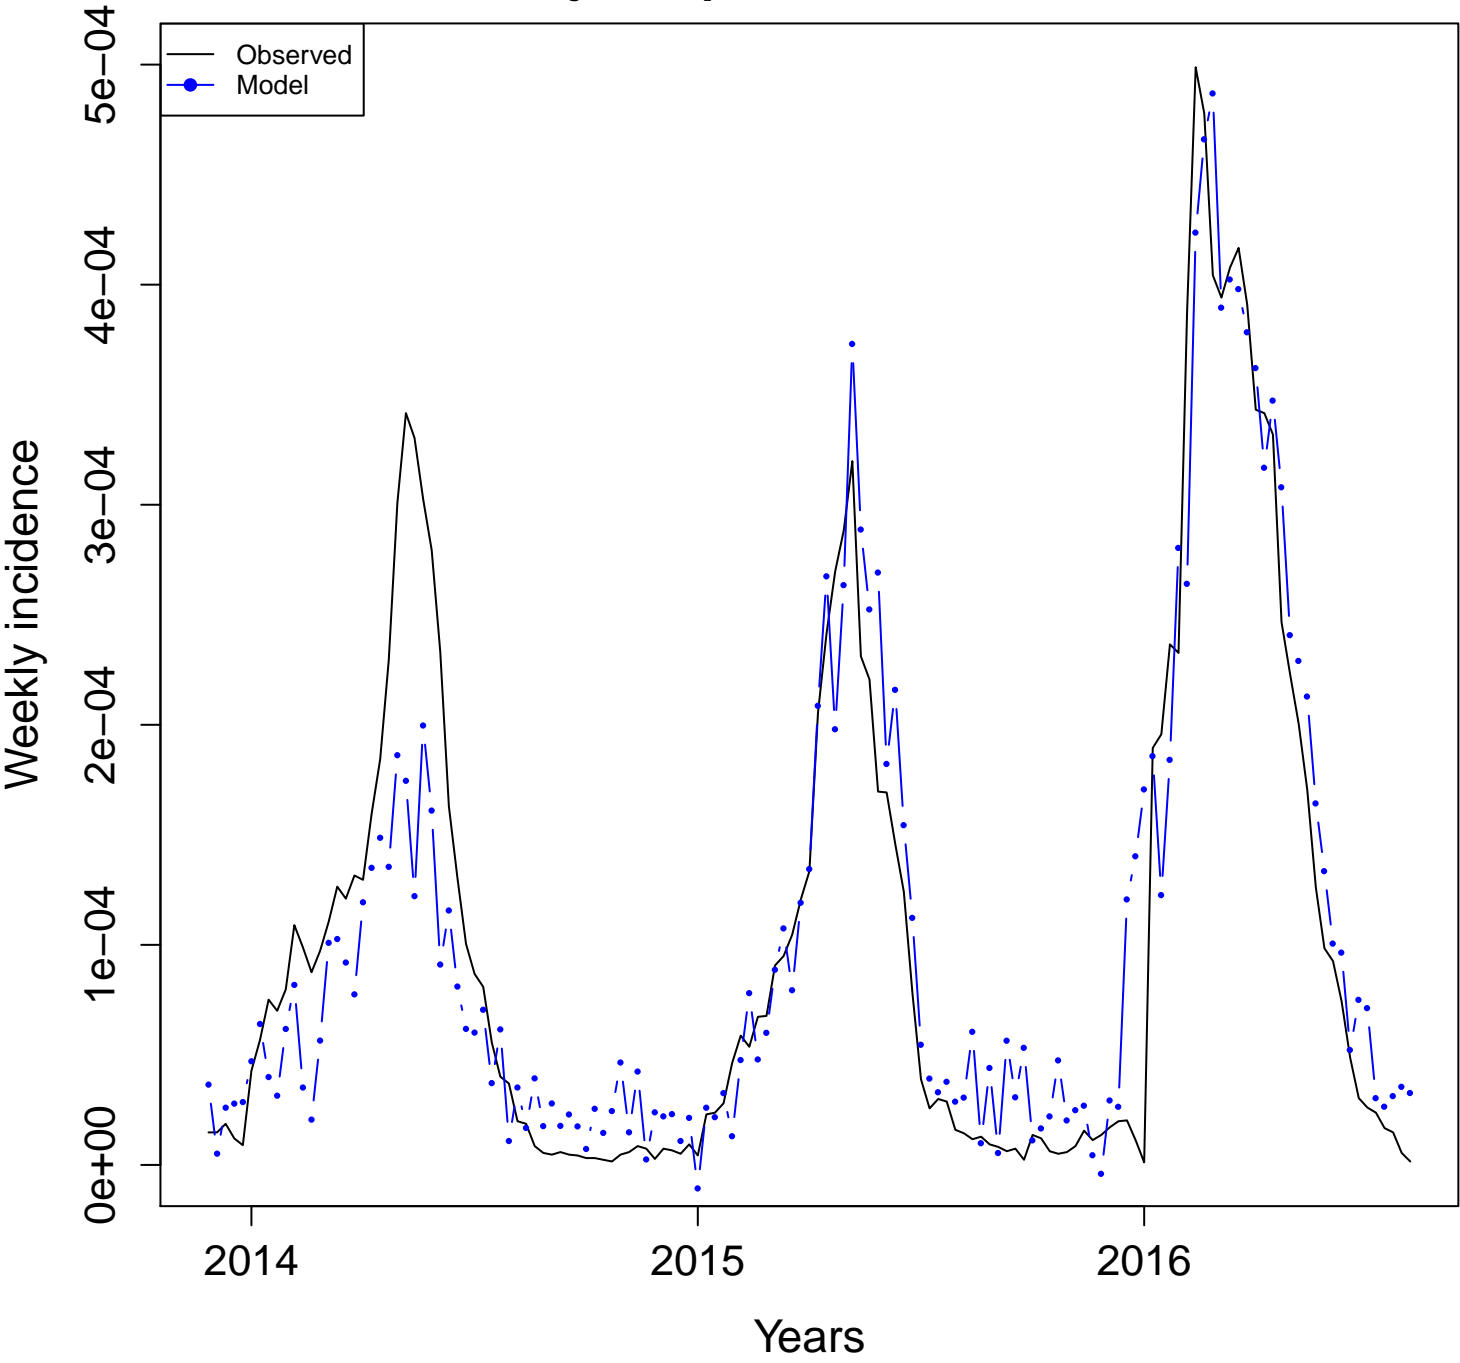

# Four terms

**BR-DF**  
**Adj. R squared = 0.8297**

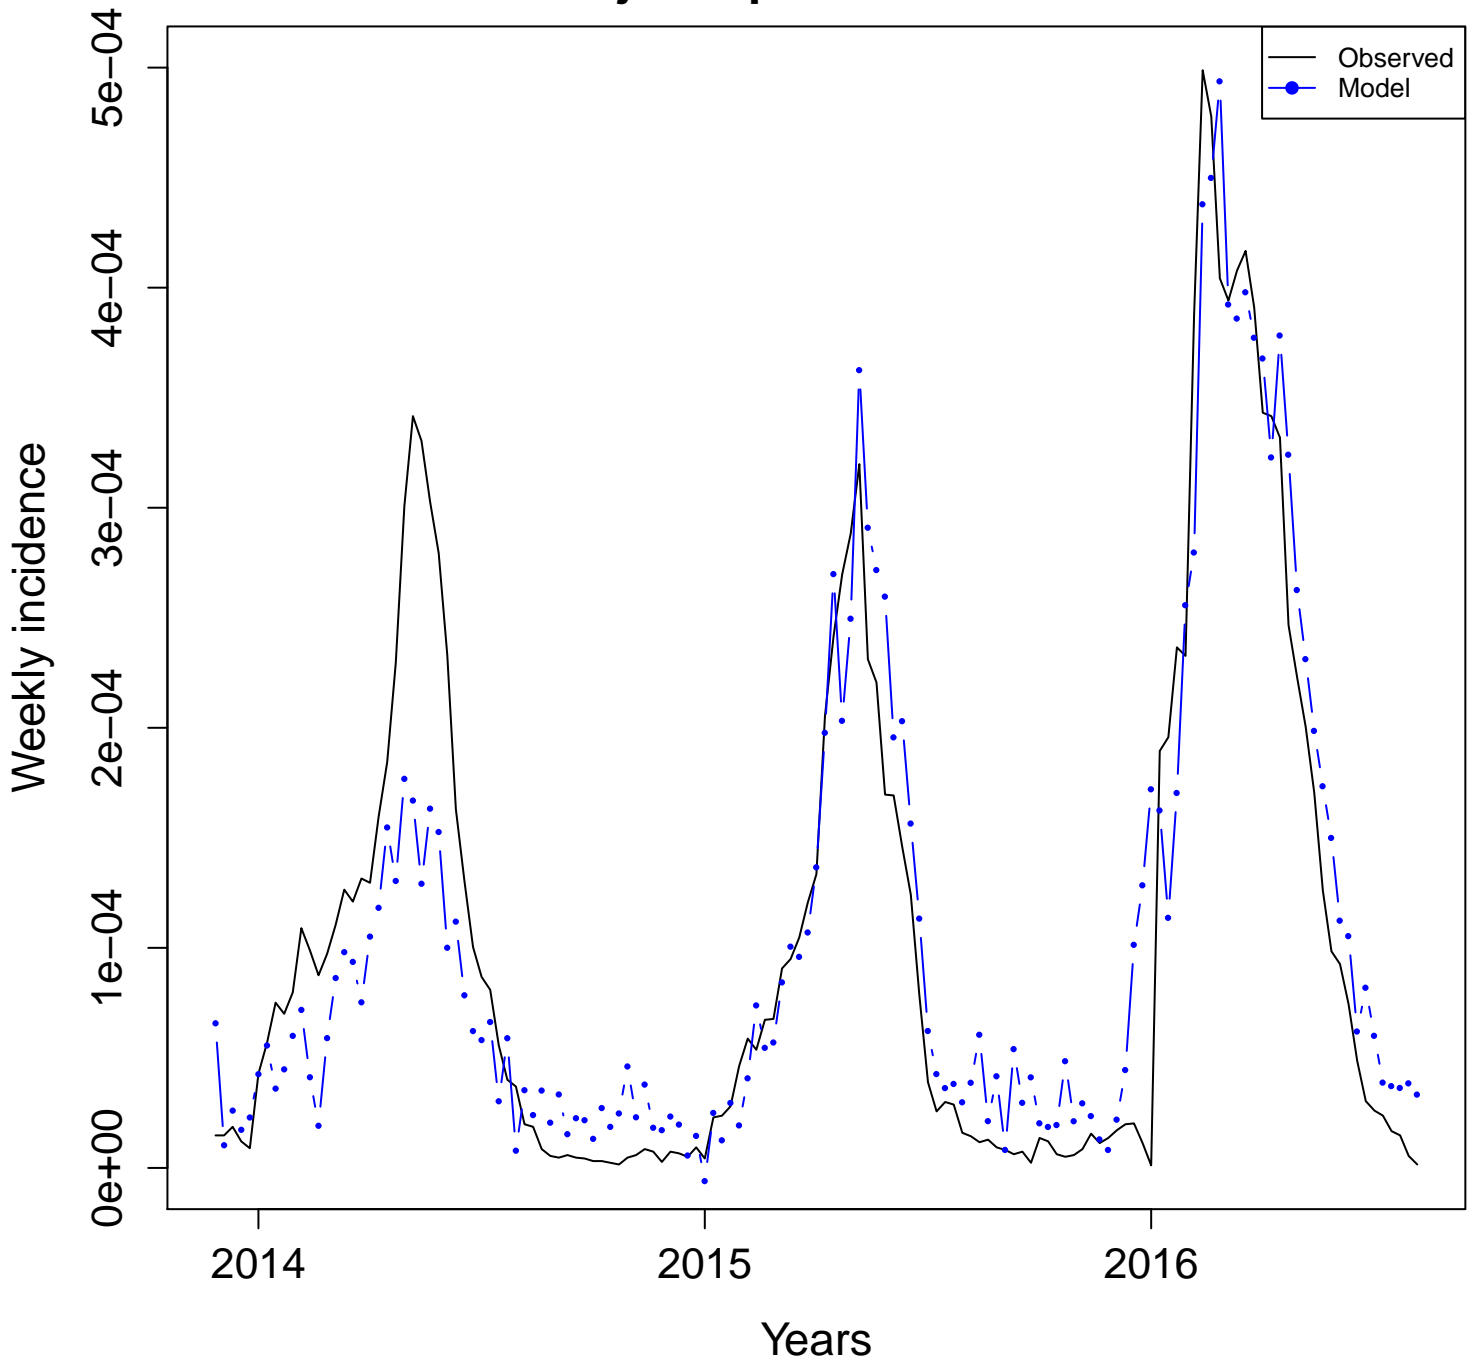

# Uncorrelated (n = 2)

BR-DF  
Adj. R squared = 0.432886

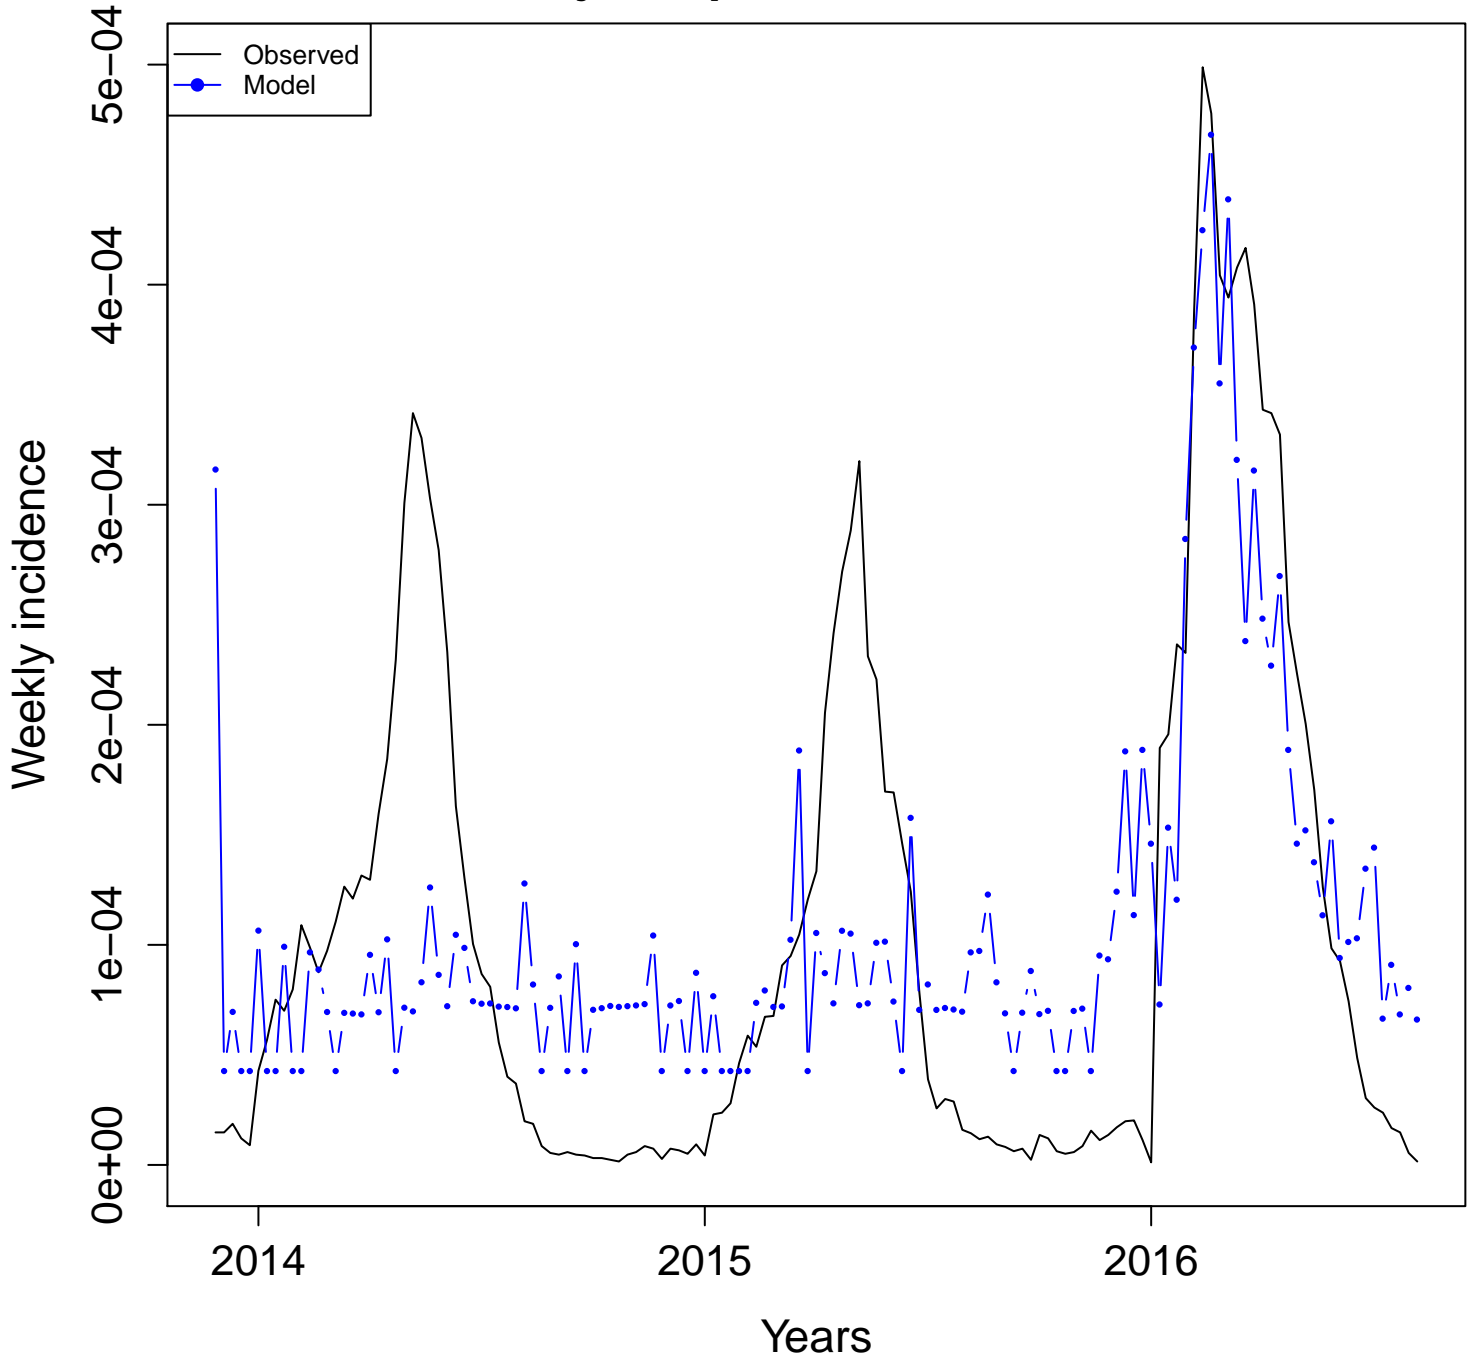



**Individual terms**  
**Adjusted R Squared**

**Distrito Federal (DF)**

**DF- aedes**  
**Adj. R squared = 0.4554**

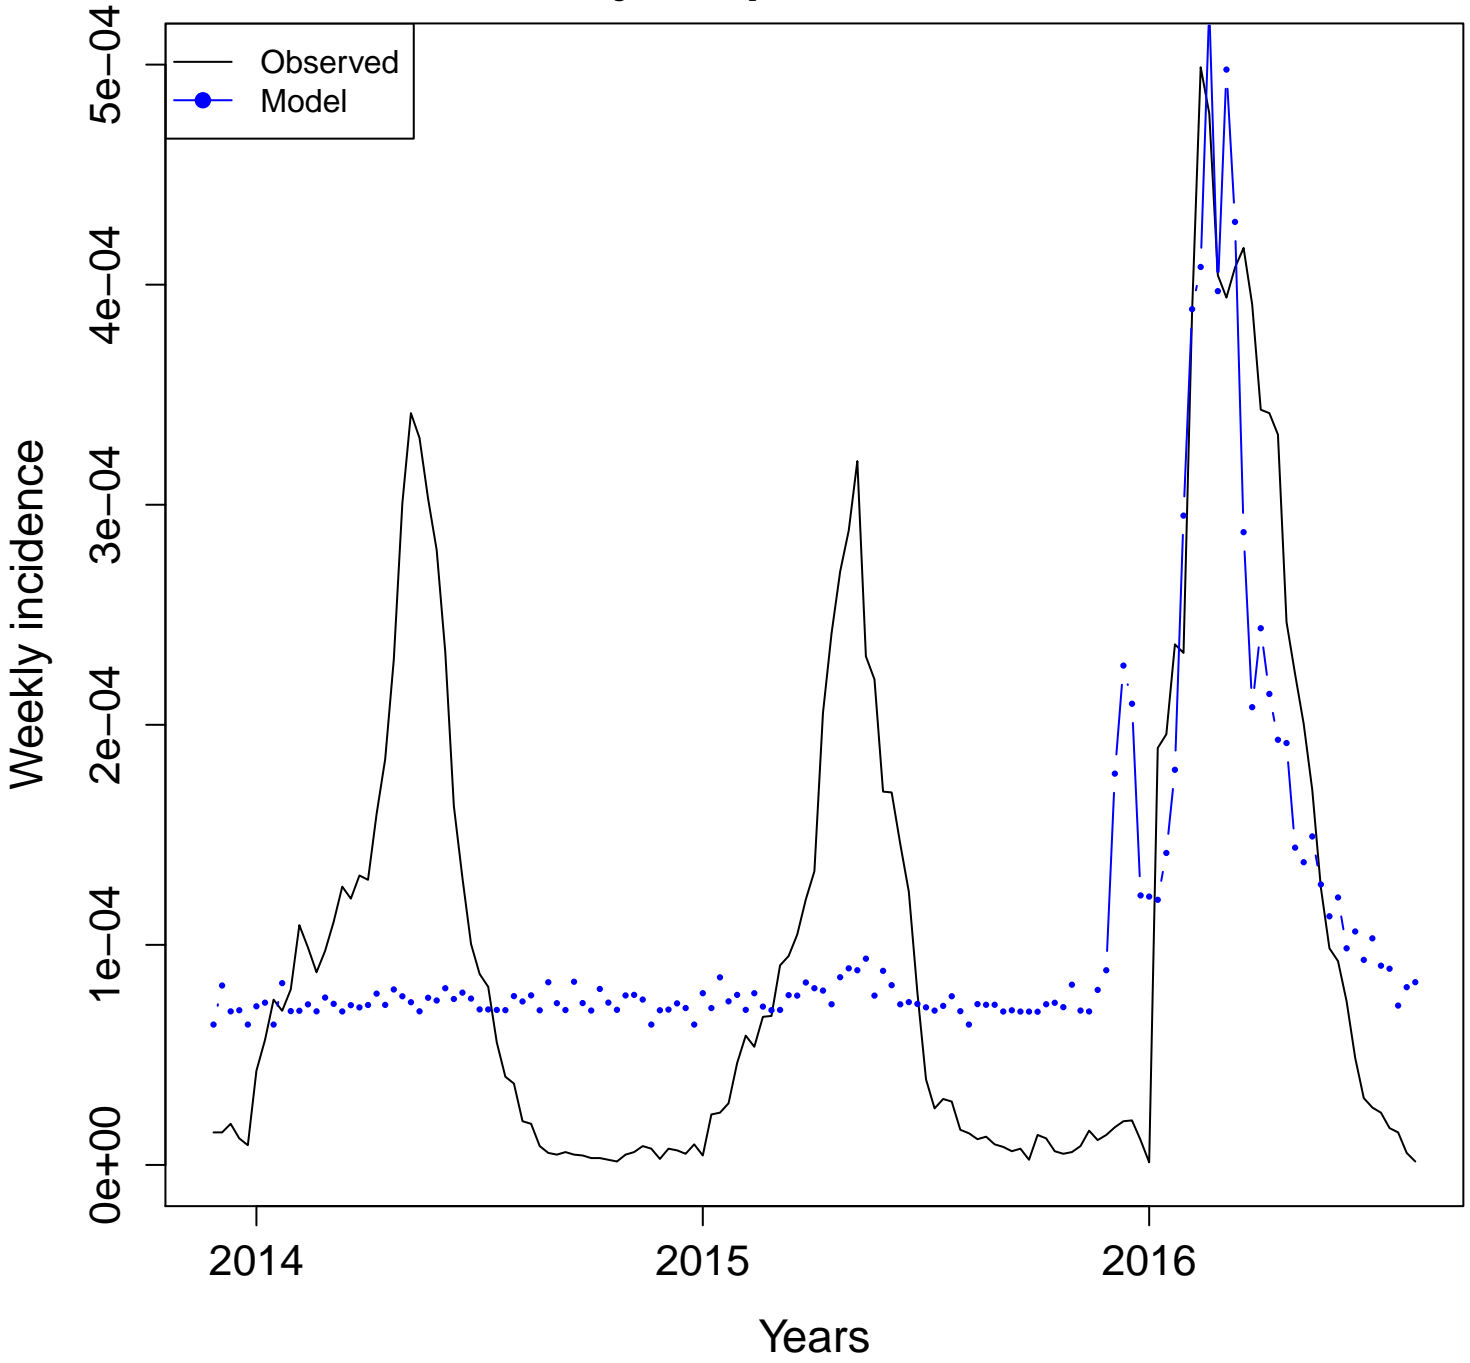

**DF- aedes.aegypti**  
**Adj. R squared = 0.4535**

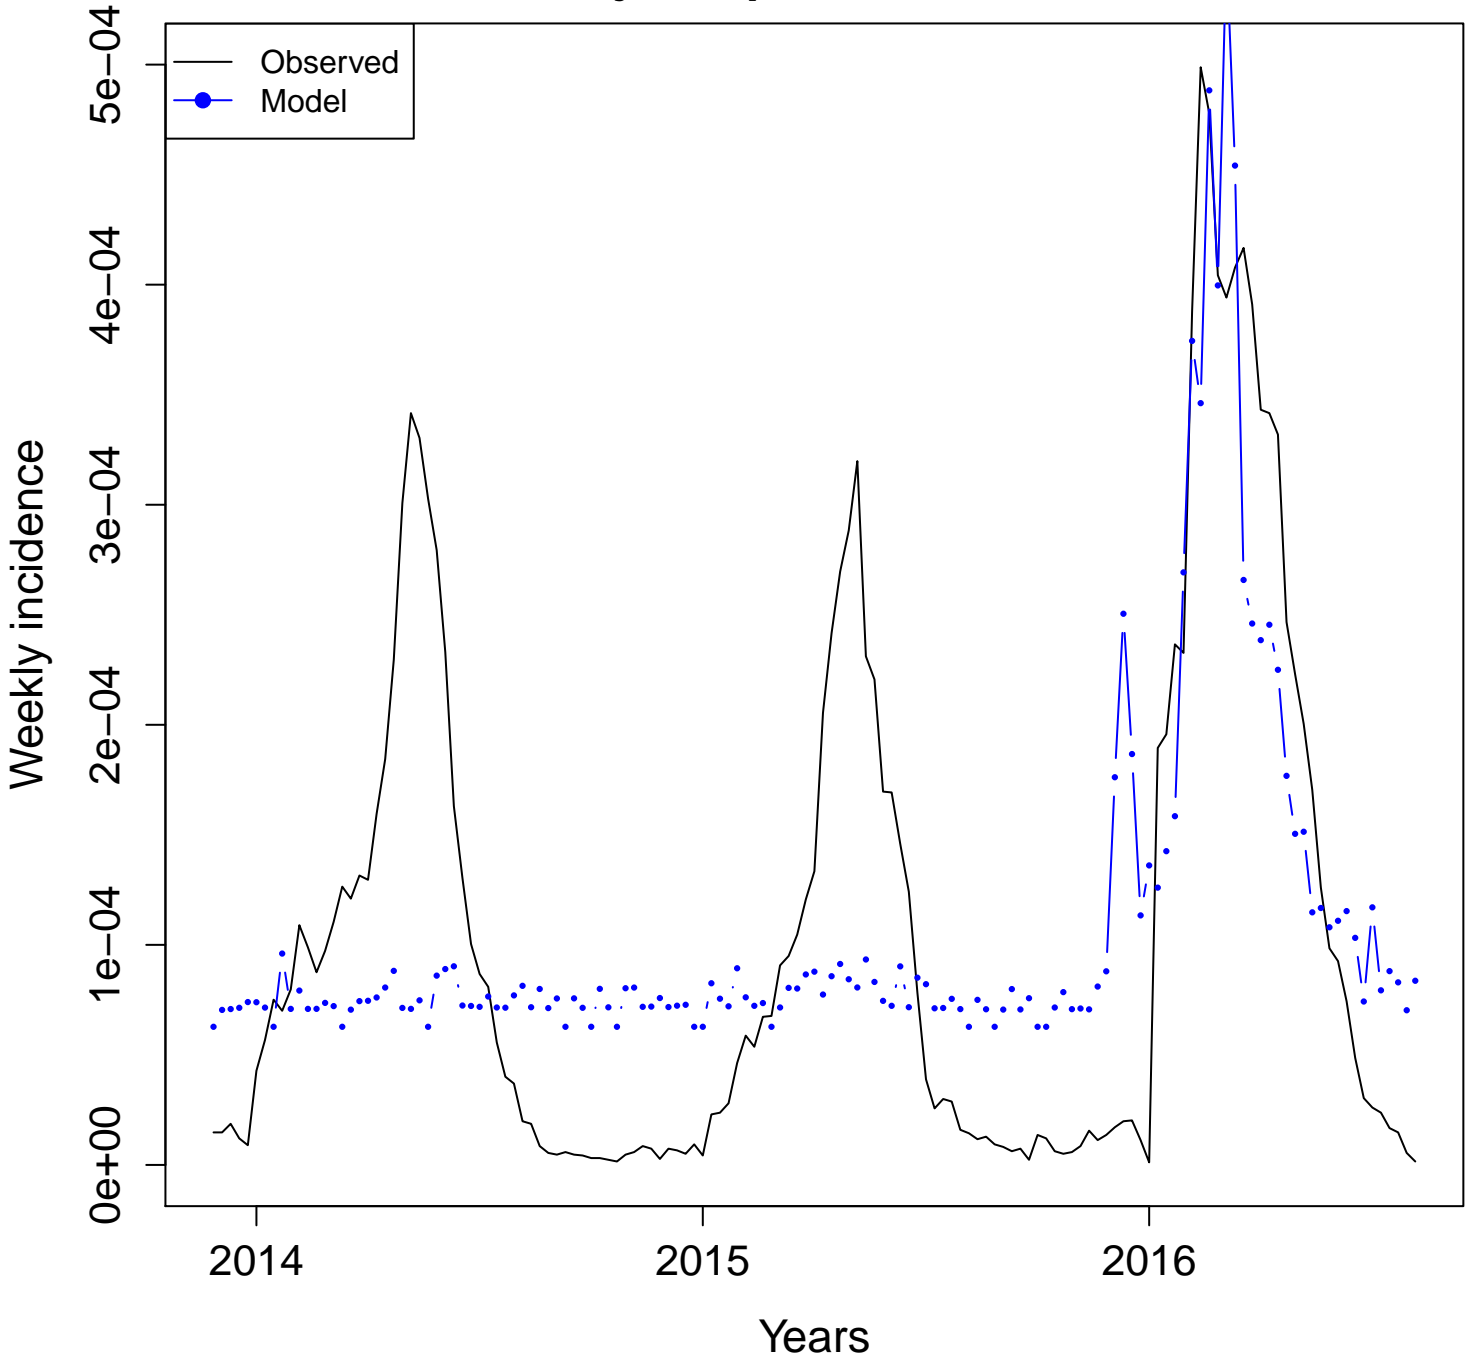

**DF- aegypti**  
**Adj. R squared = 0.4564**

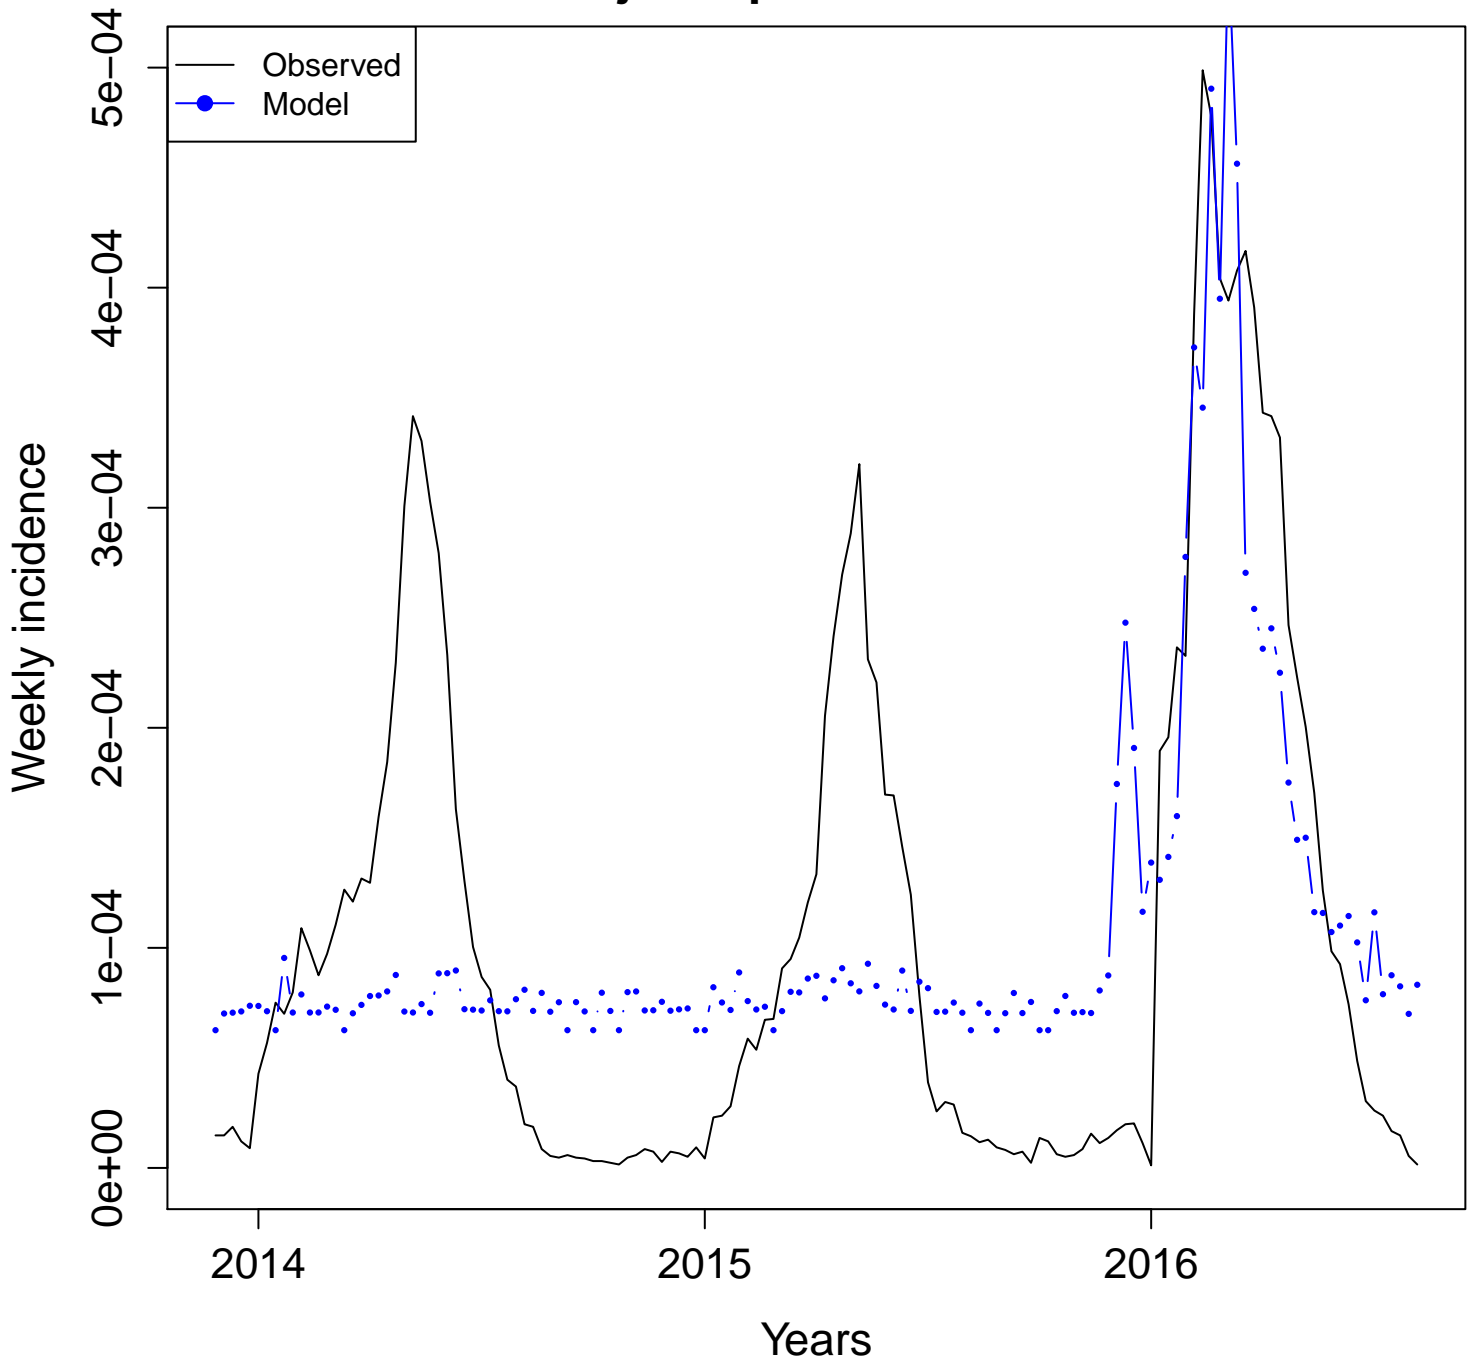

**DF- dengue**  
**Adj. R squared = 0.7404**

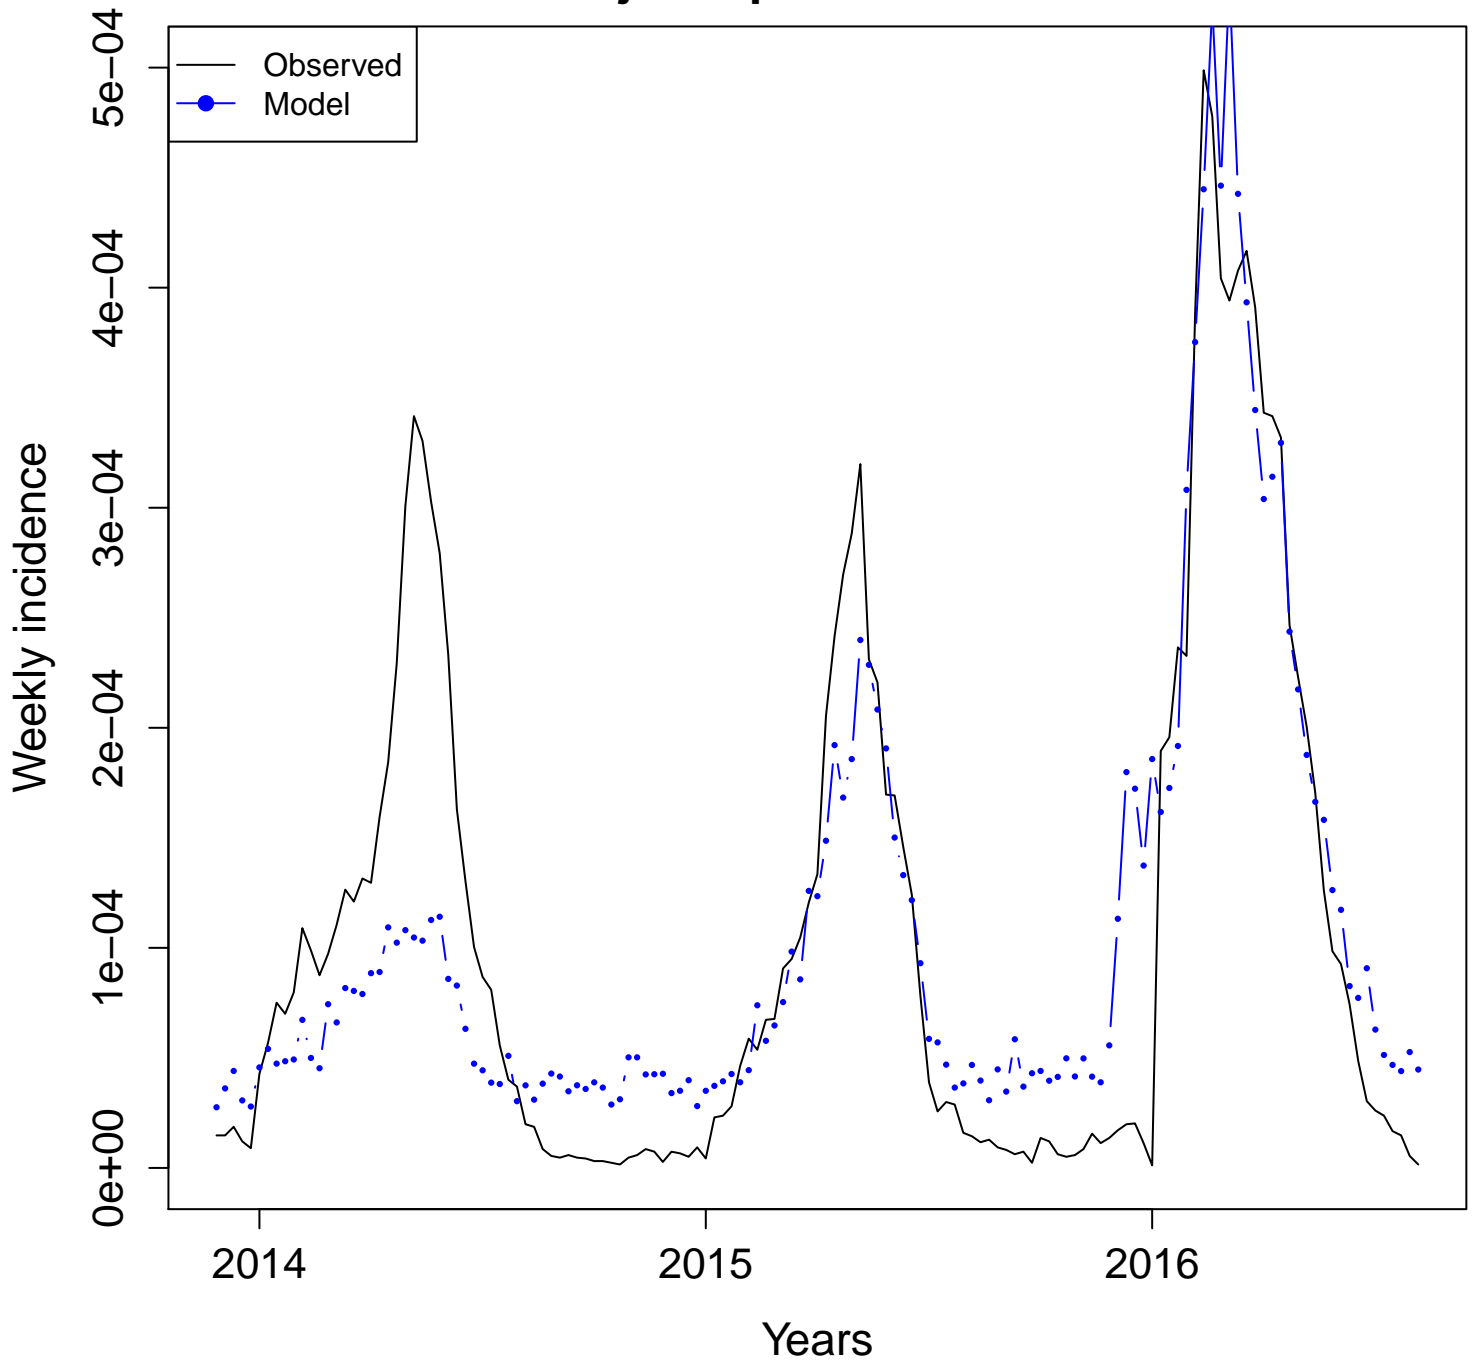

**DF- dengue.sintomas**  
**Adj. R squared = 0.7916**

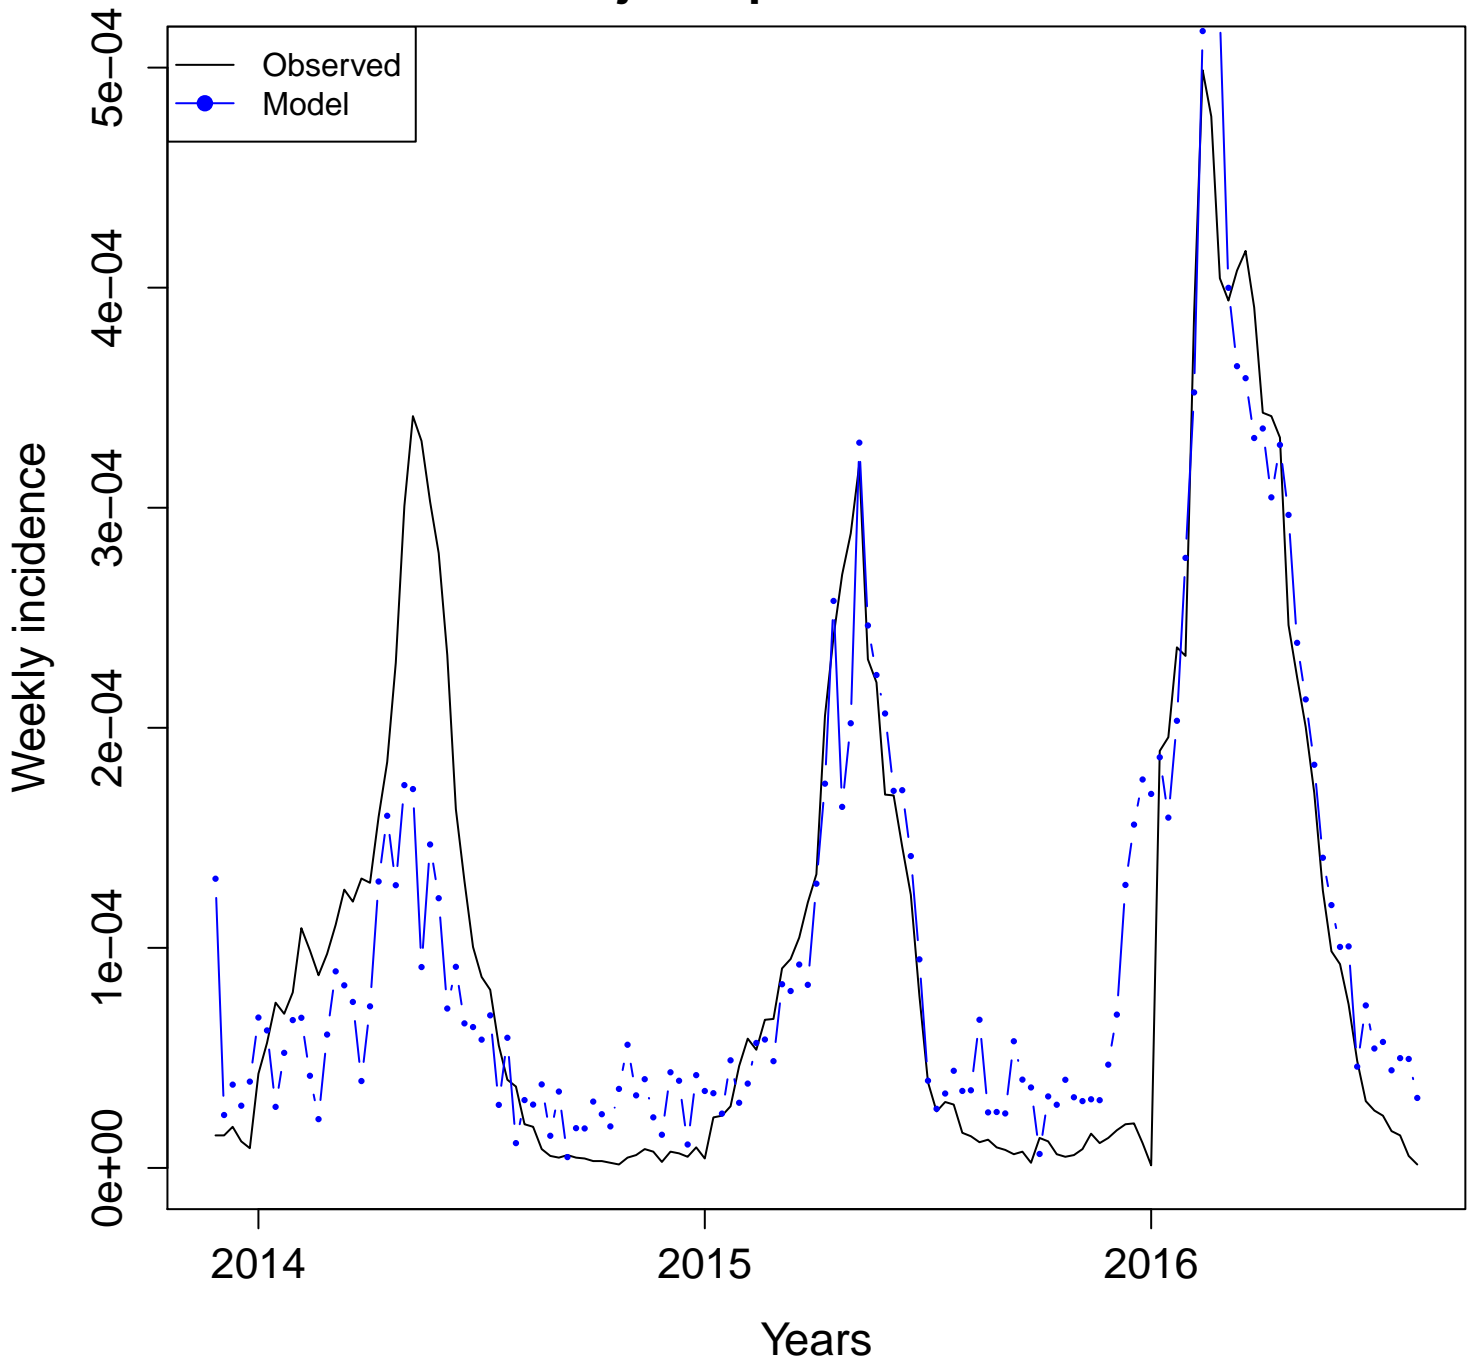

**DF- dengue.virus**  
**Adj. R squared = 0.4185**

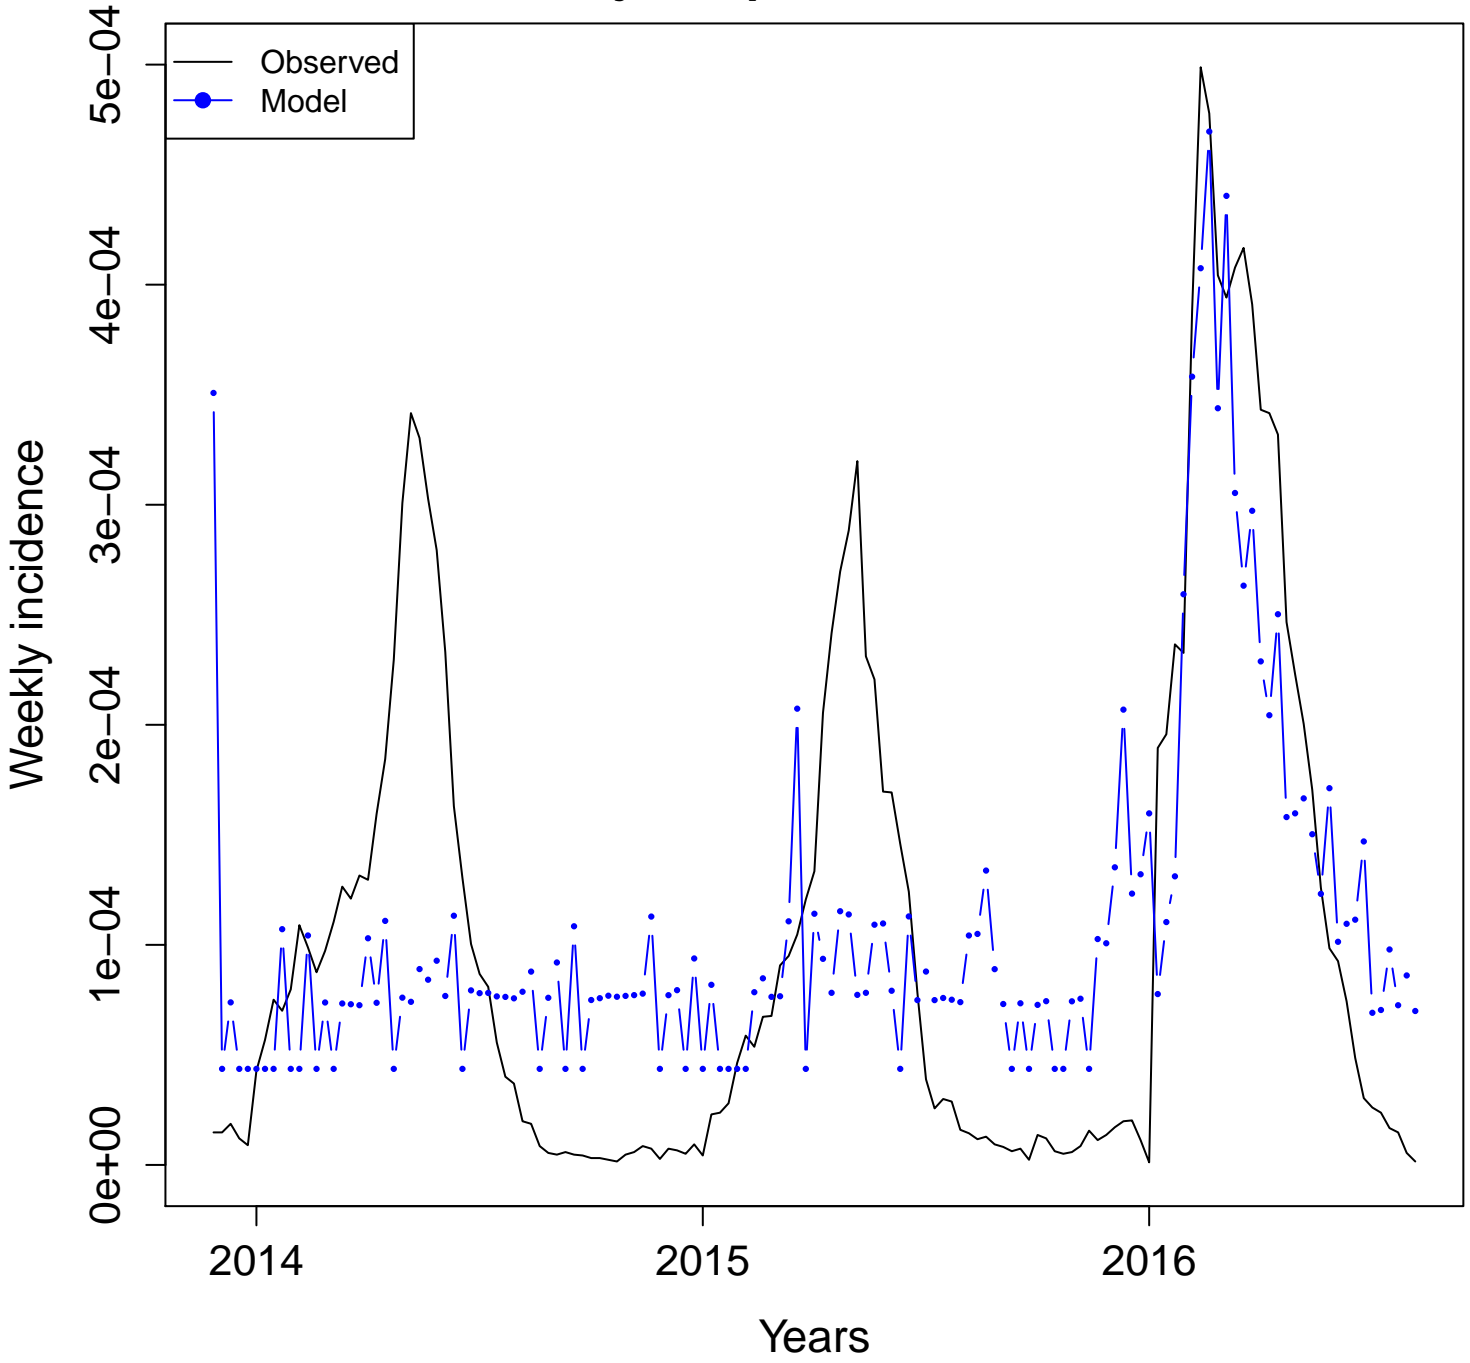

# DF- mosquito

Adj. R squared = 0.4719

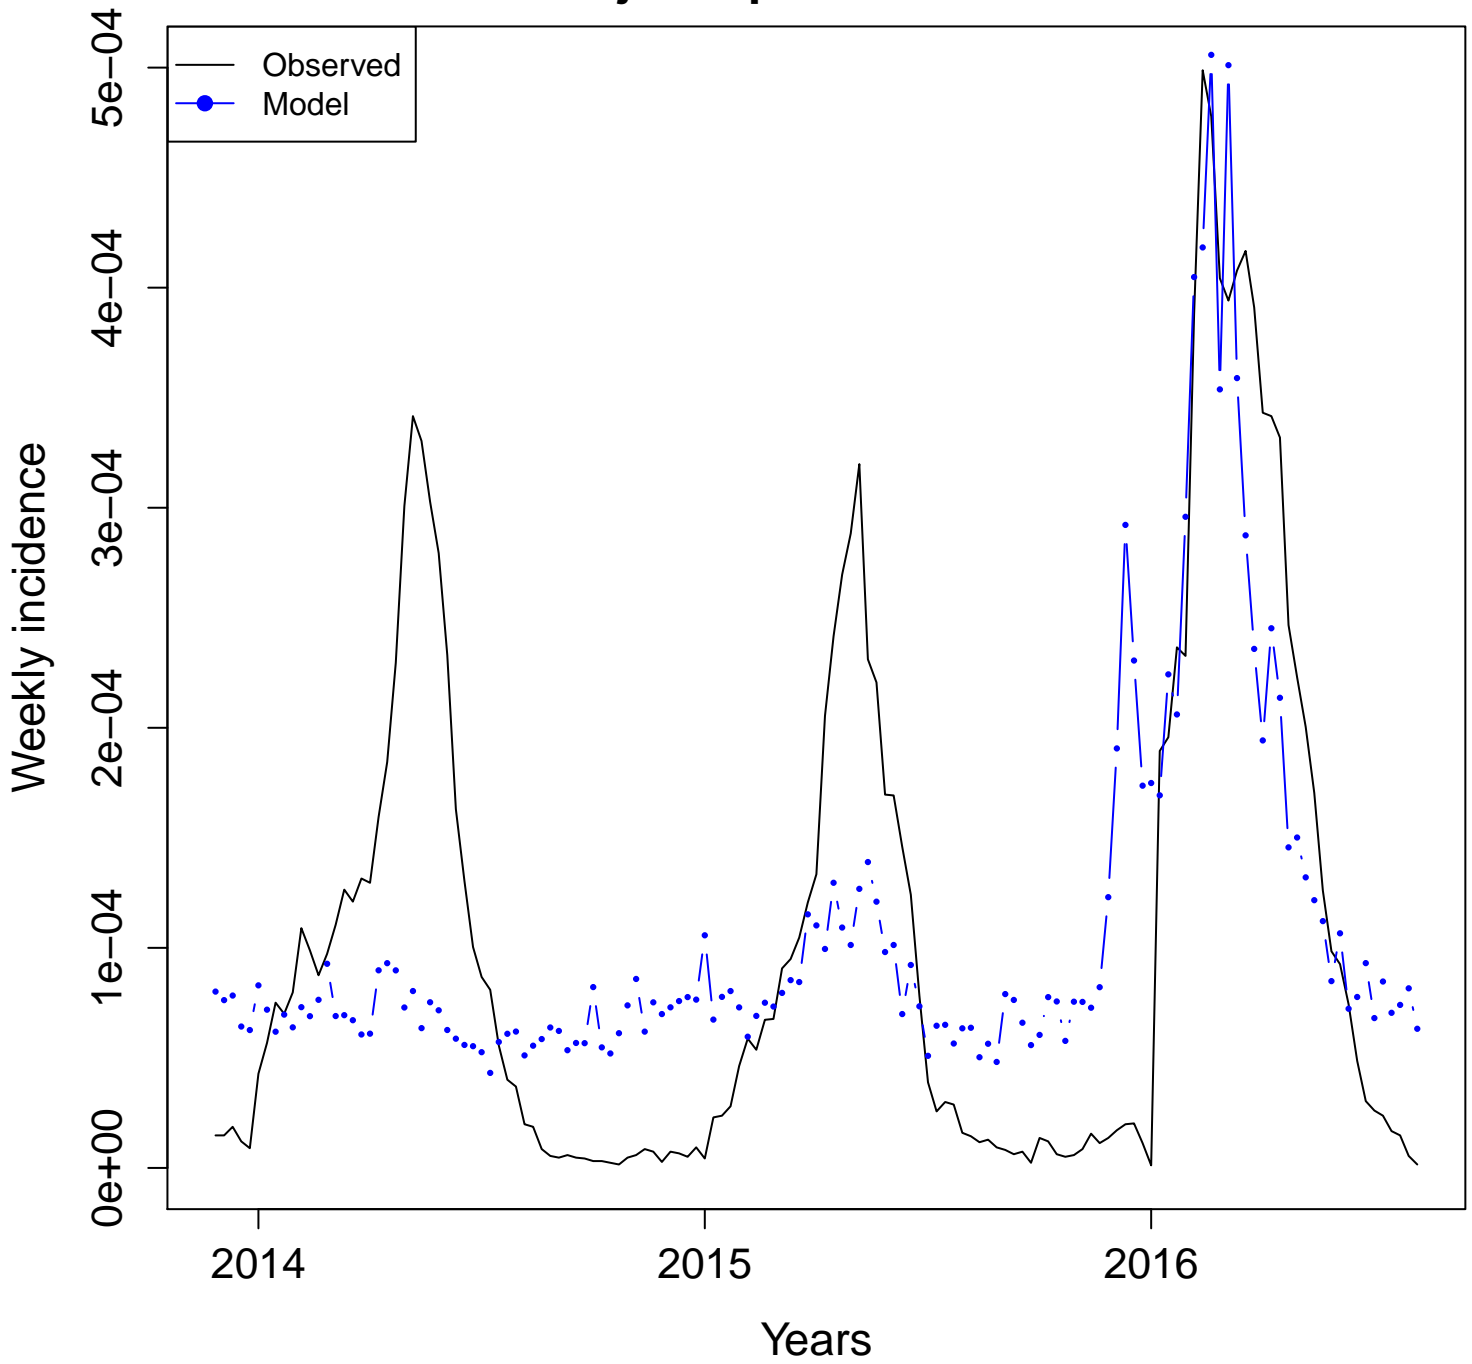



**DF- mosquito.dengue**  
**Adj. R squared = 0.5131**

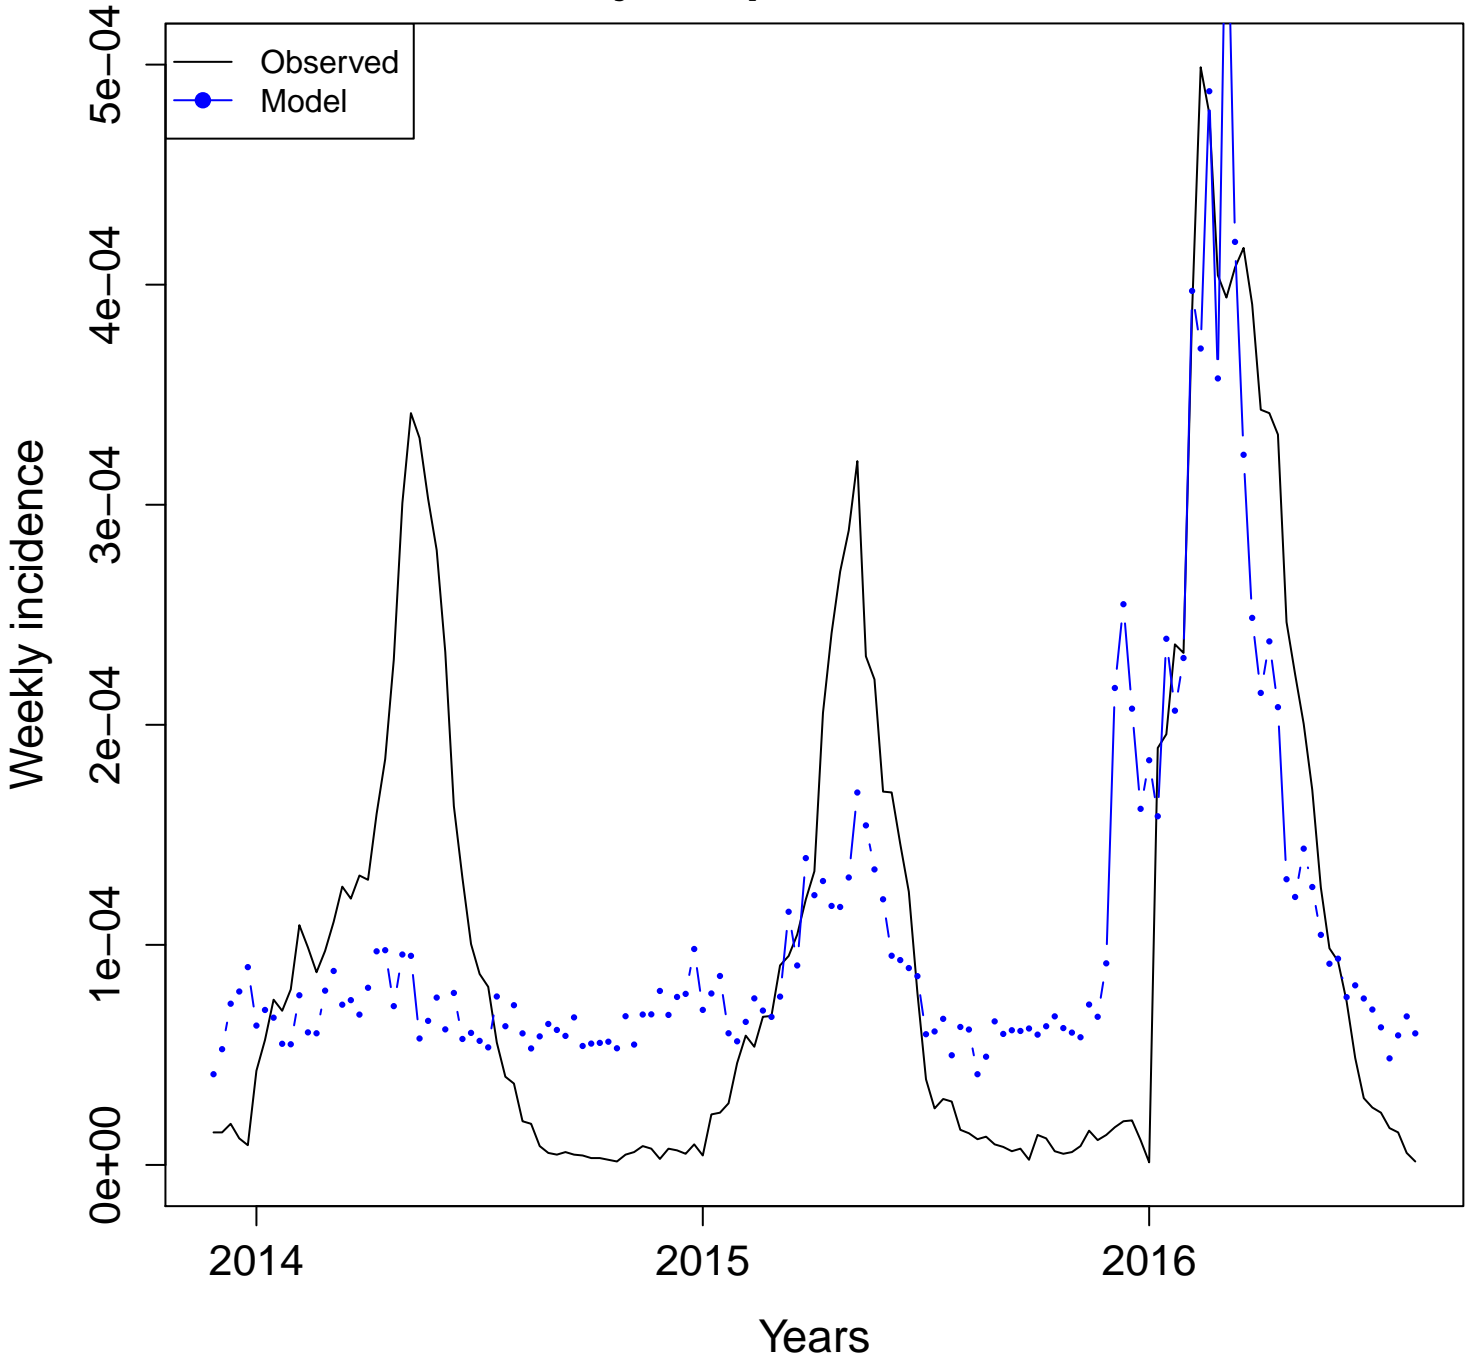

# DF- mosquitoes

Adj. R squared = 0.1733

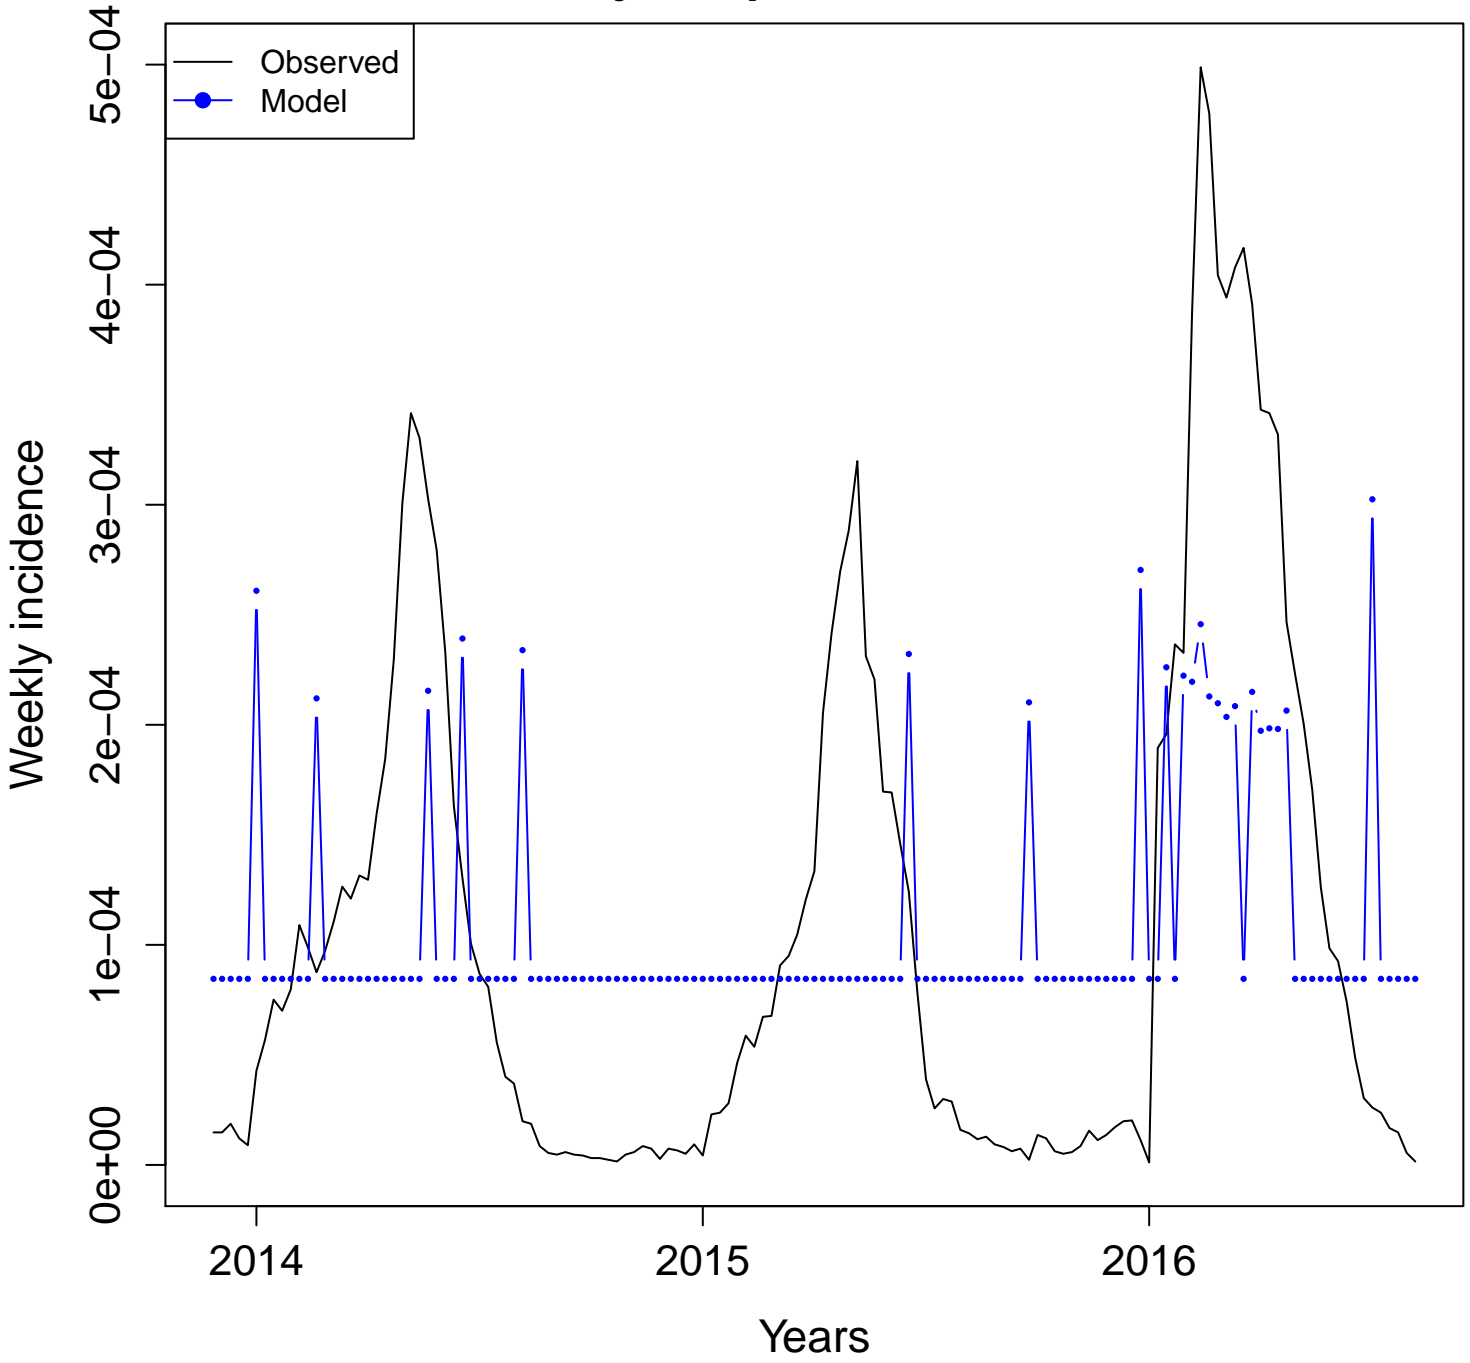

**DF- sintomas.da.dengue**  
**Adj. R squared = 0.7613**

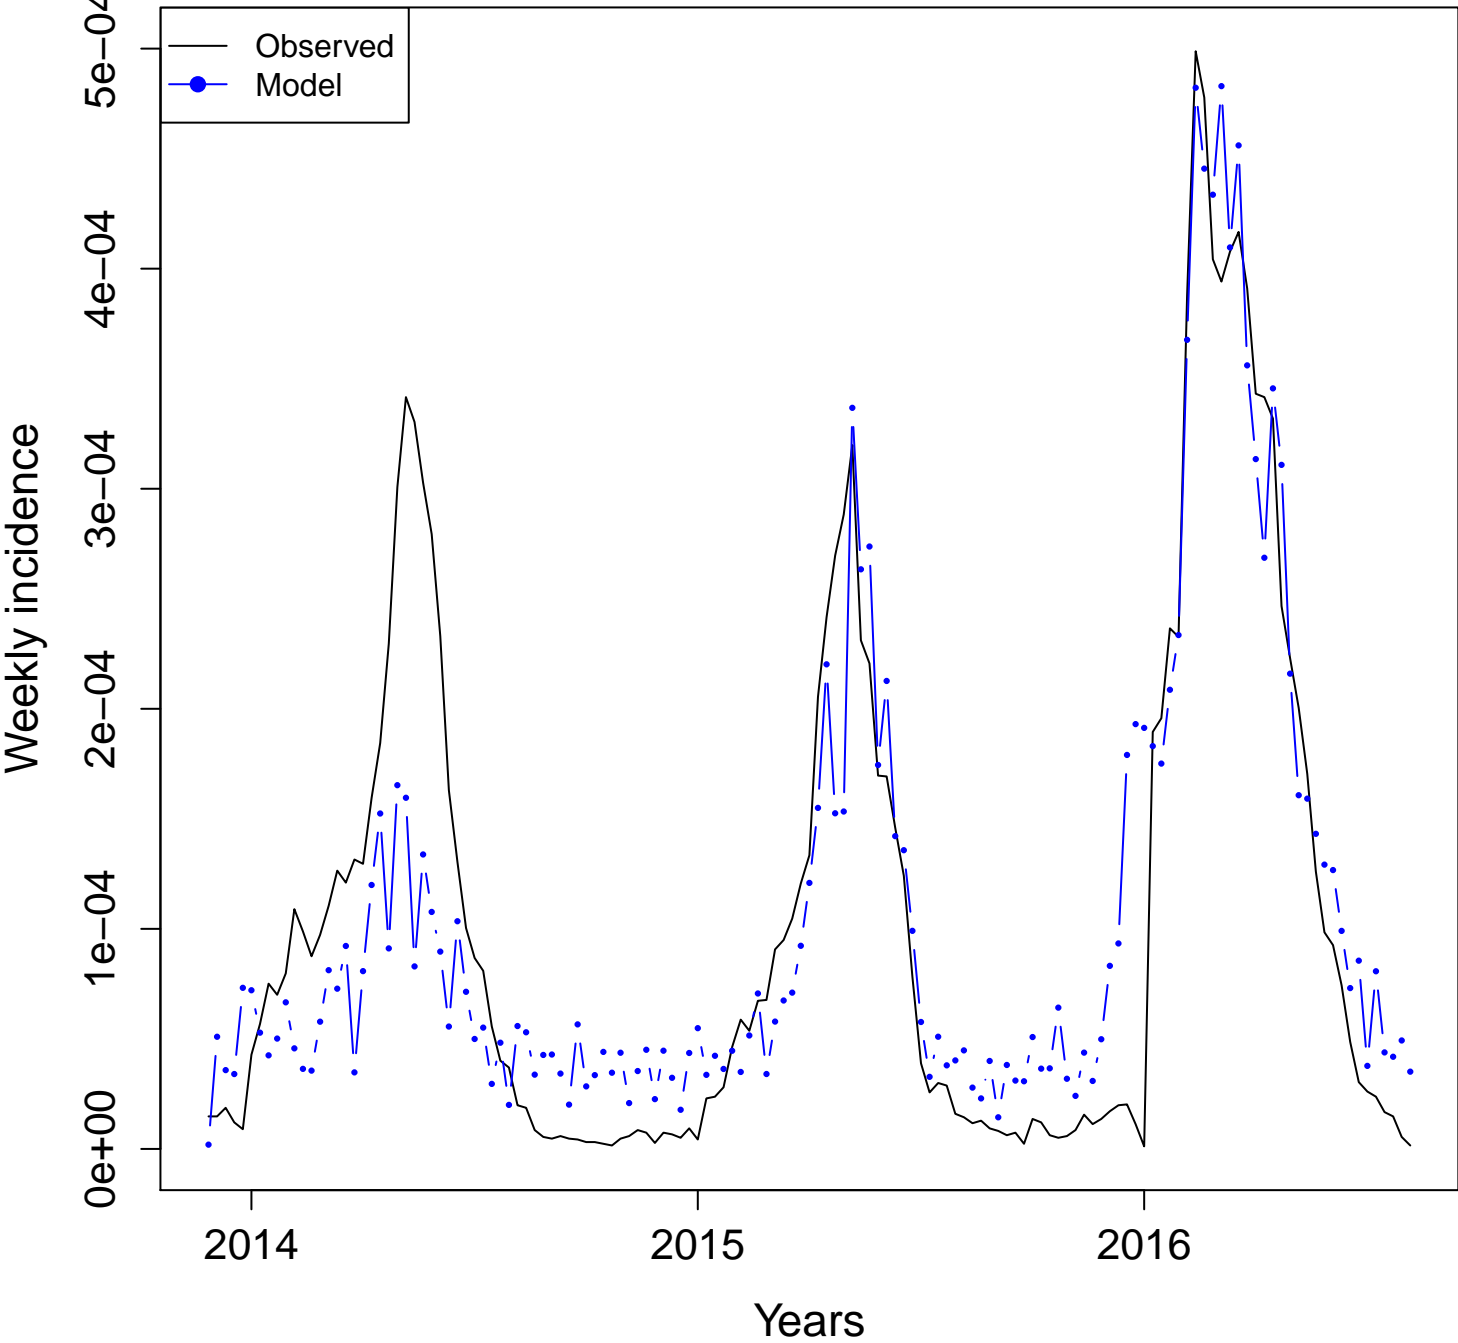

## Espírito Santo (ES)

# Dengue incidence vs. Google Health Trends (2011–2016)

### Definitions:

- **Combined terms:**
  - **All:** model with all the available terms.  $n =$  number of terms
  - **Four:** model with "dengue", "dengue sintomas", "aedes", and "mosquito".
  - **Uncorrelated:** model with non-correlated terms.  $n =$  number of uncorrelated terms
- **Individual terms:** Plots developed with one term at a time.
- Terms for all and uncorrelated models can be found in additional file 3.

**Combined terms**  
**Adjusted R squared**

**Espírito Santo (ES)**

All  
(n = 10)

BR-ES  
Adj. R squared = 0.7245

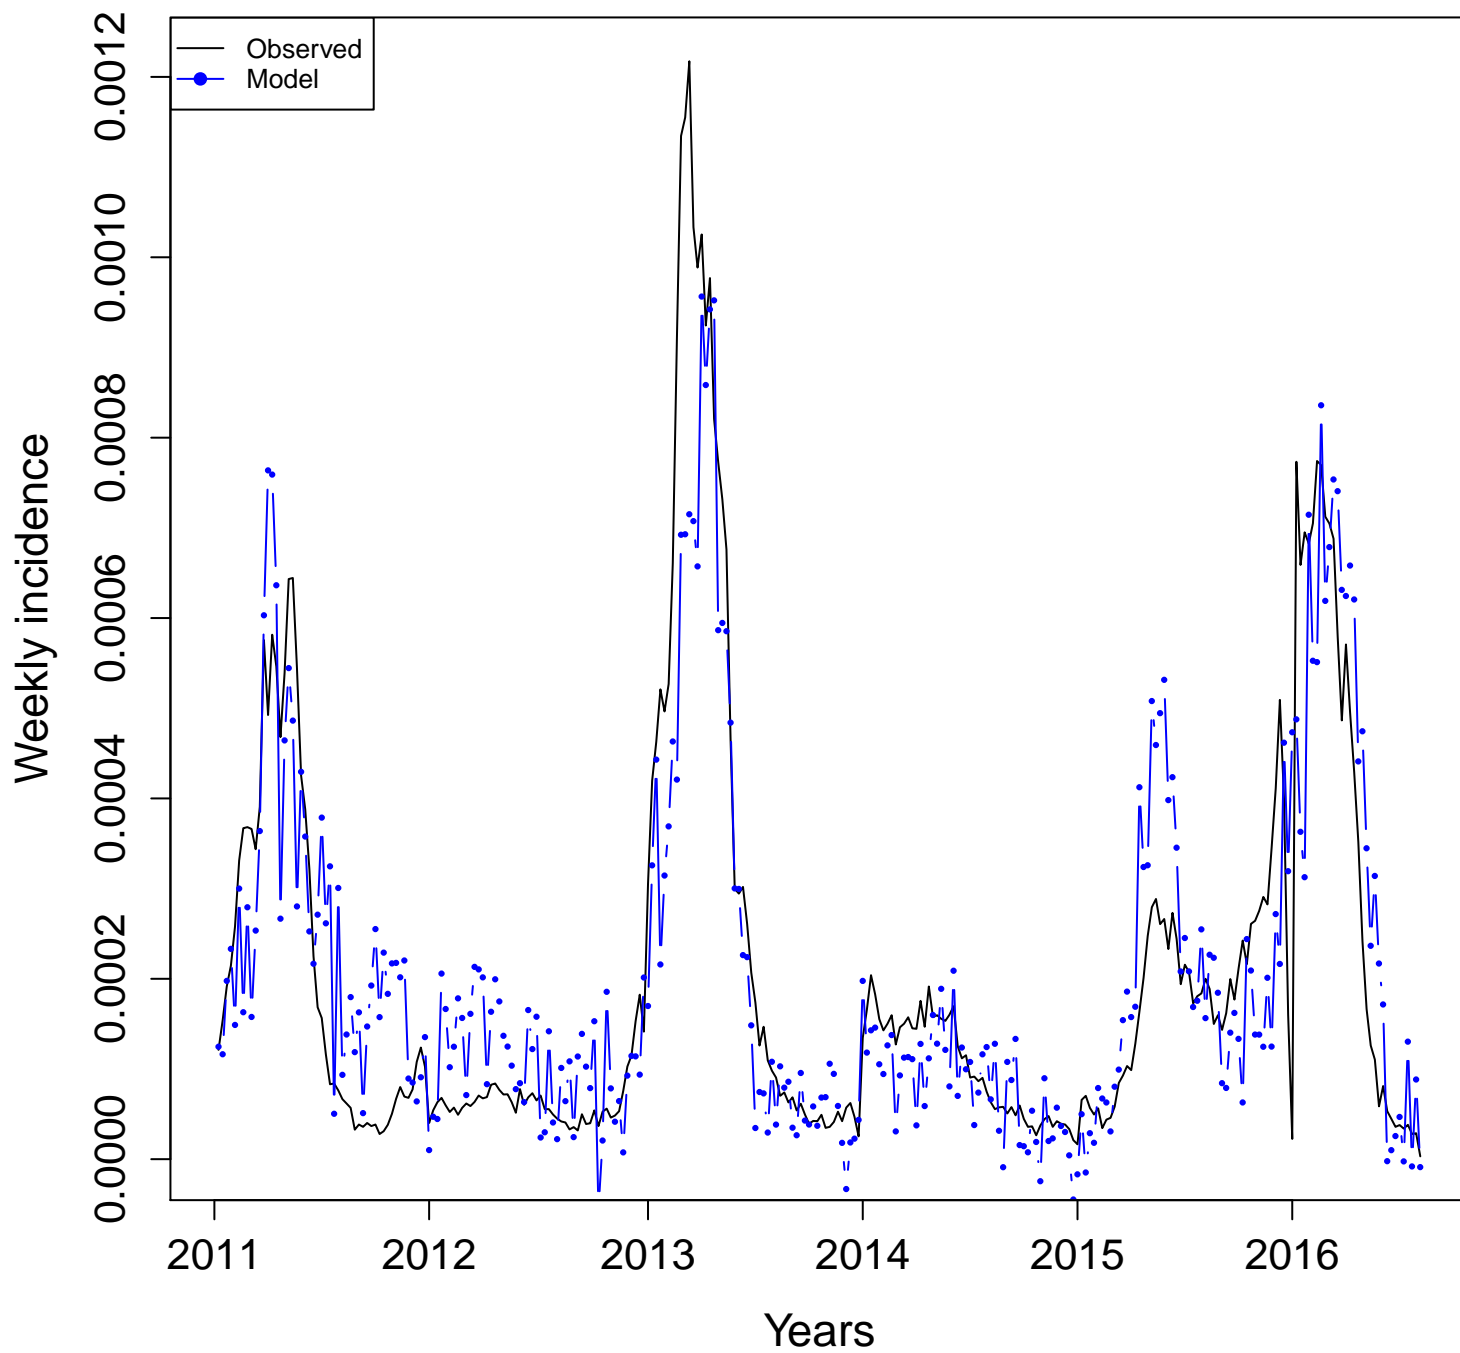

**BR-ES**  
**Adj. R squared = 0.688**

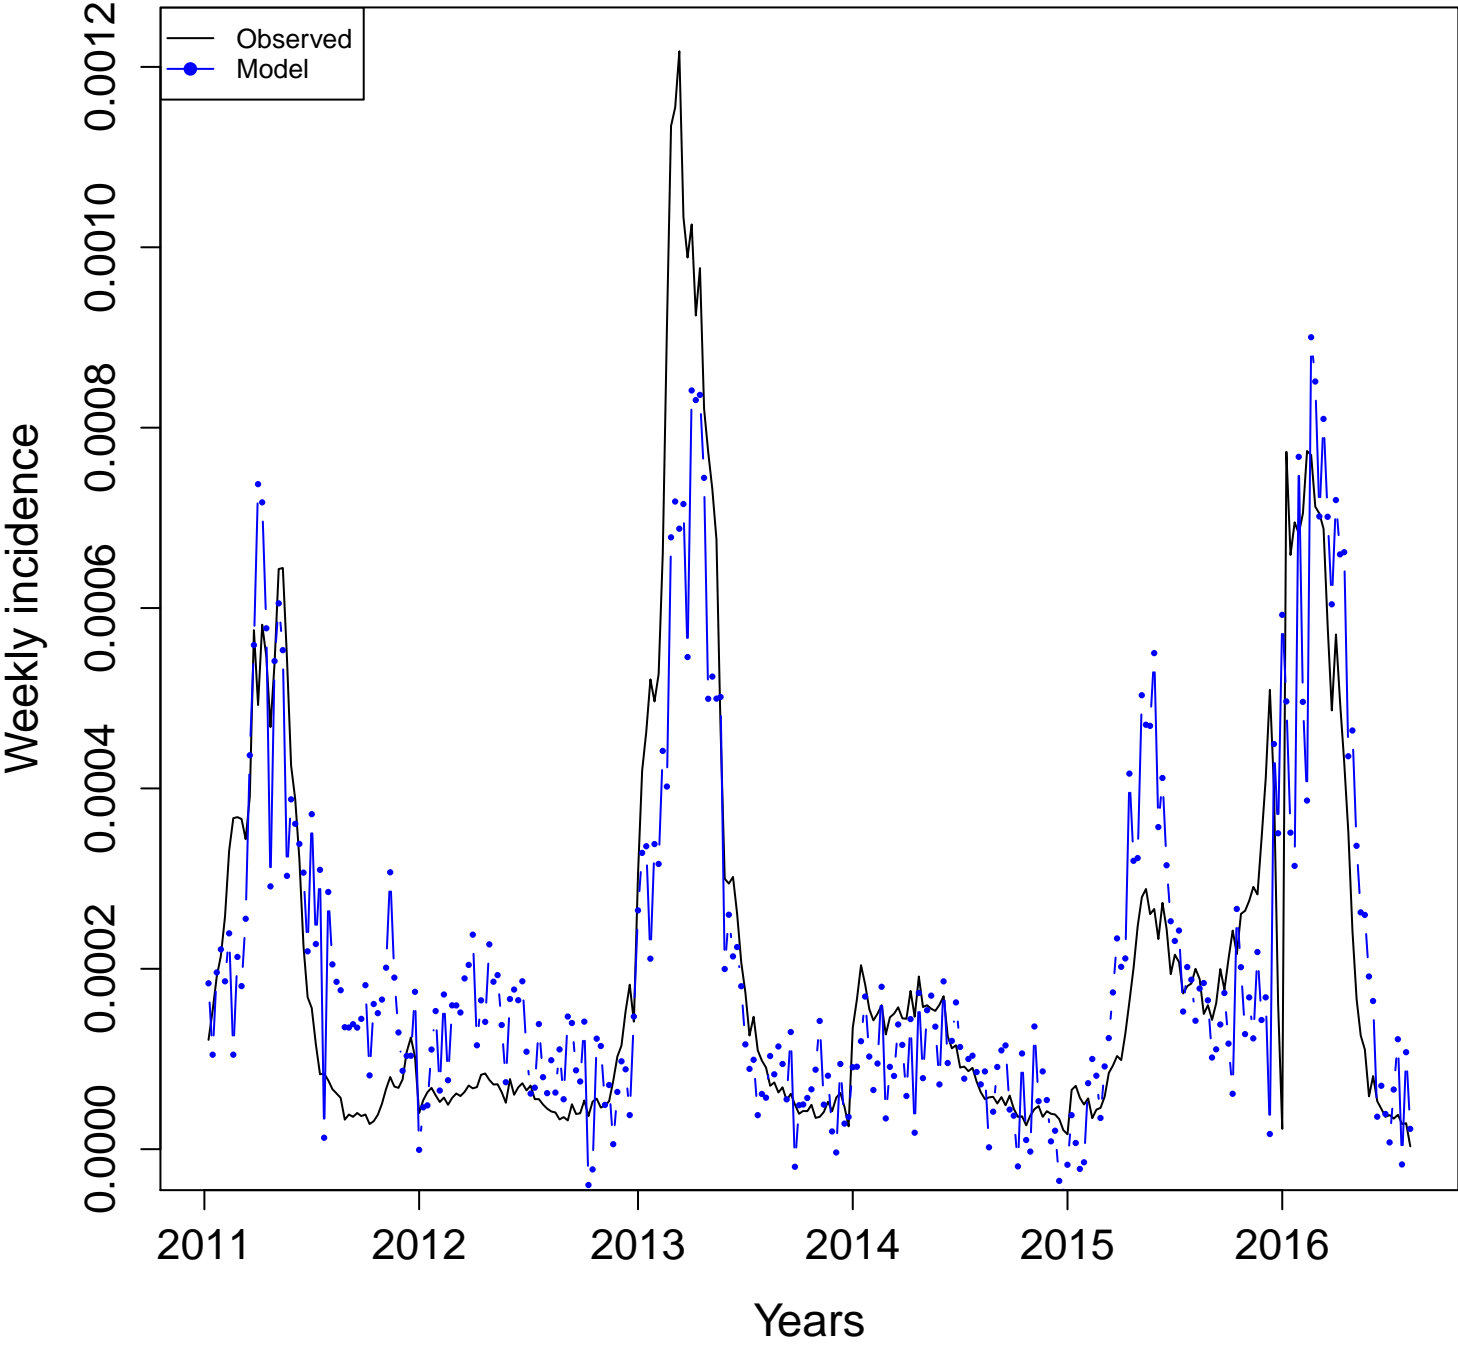

**Uncorrelated  
(n = 3)**

**BR-ES  
Adj. R squared = 0.5366**

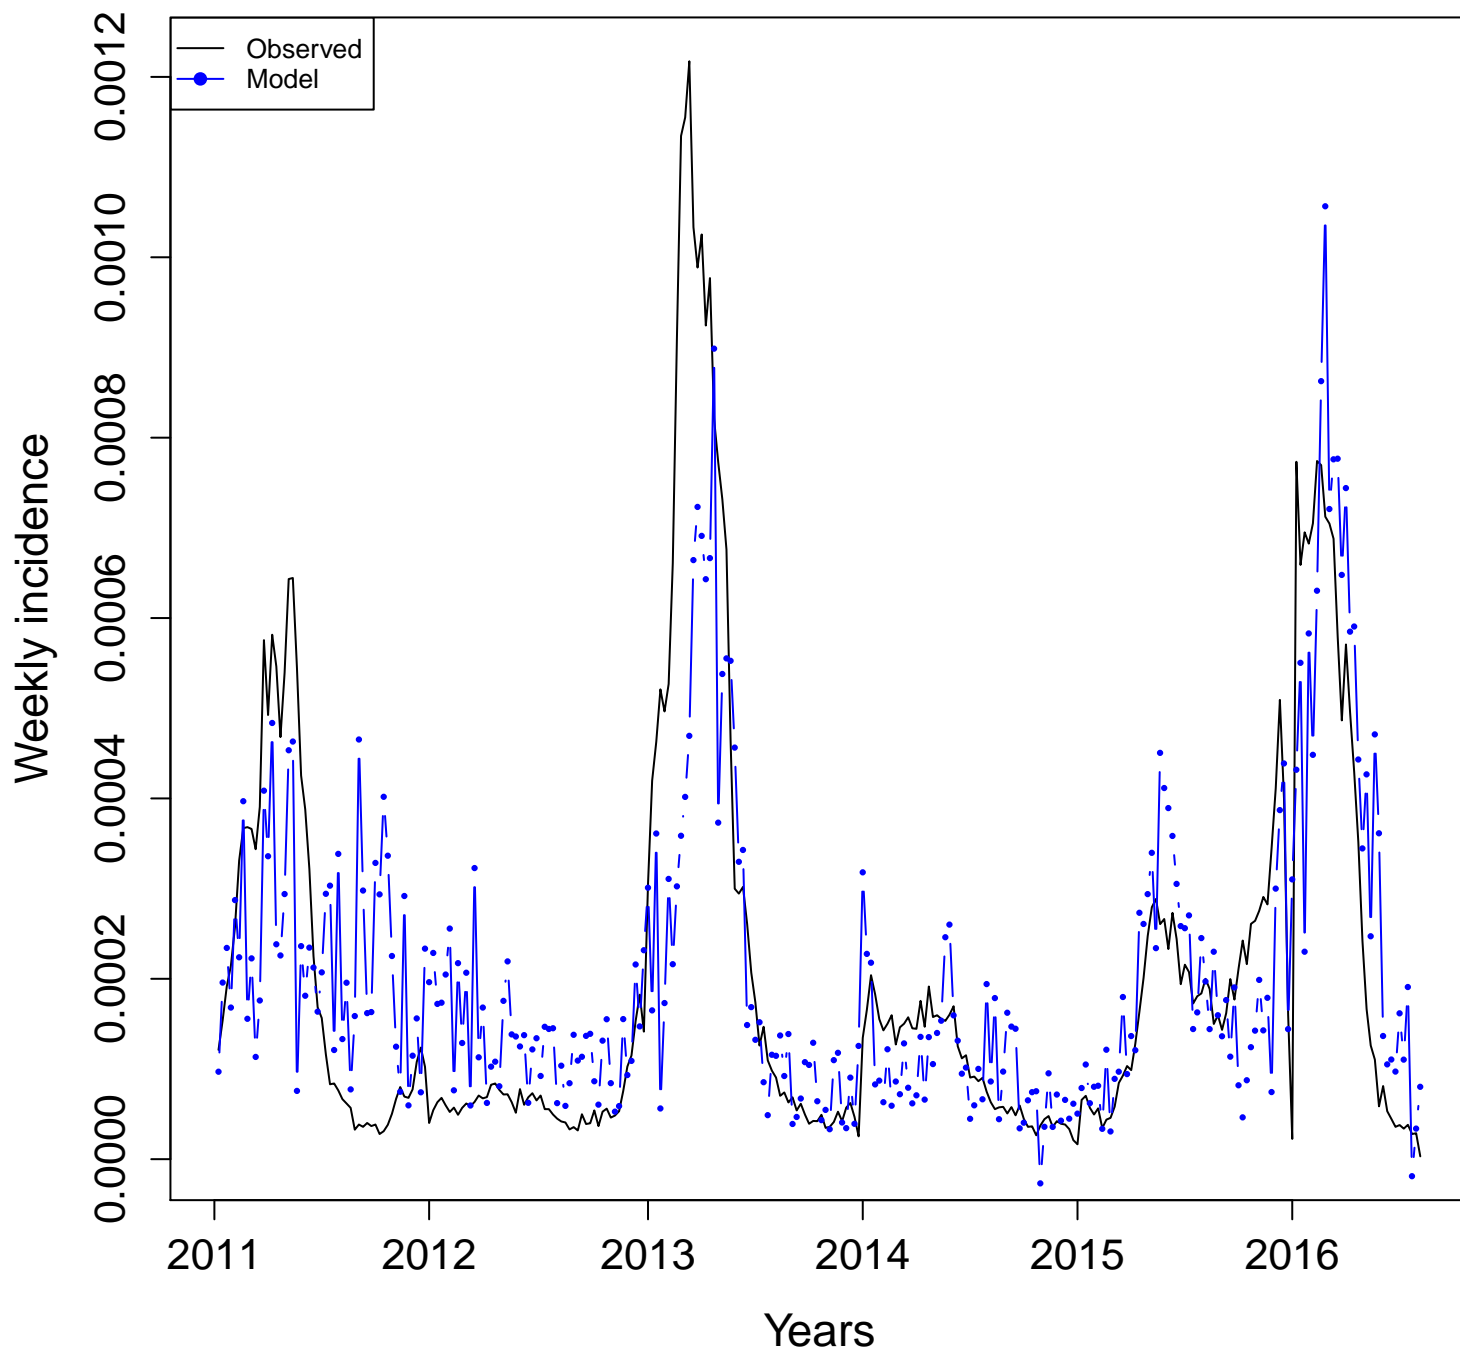



**Individual terms**  
**Adjusted R squared**

**Espírito Santo (ES)**

# ES- aedes.aegypti

Adj. R squared = 0.1333

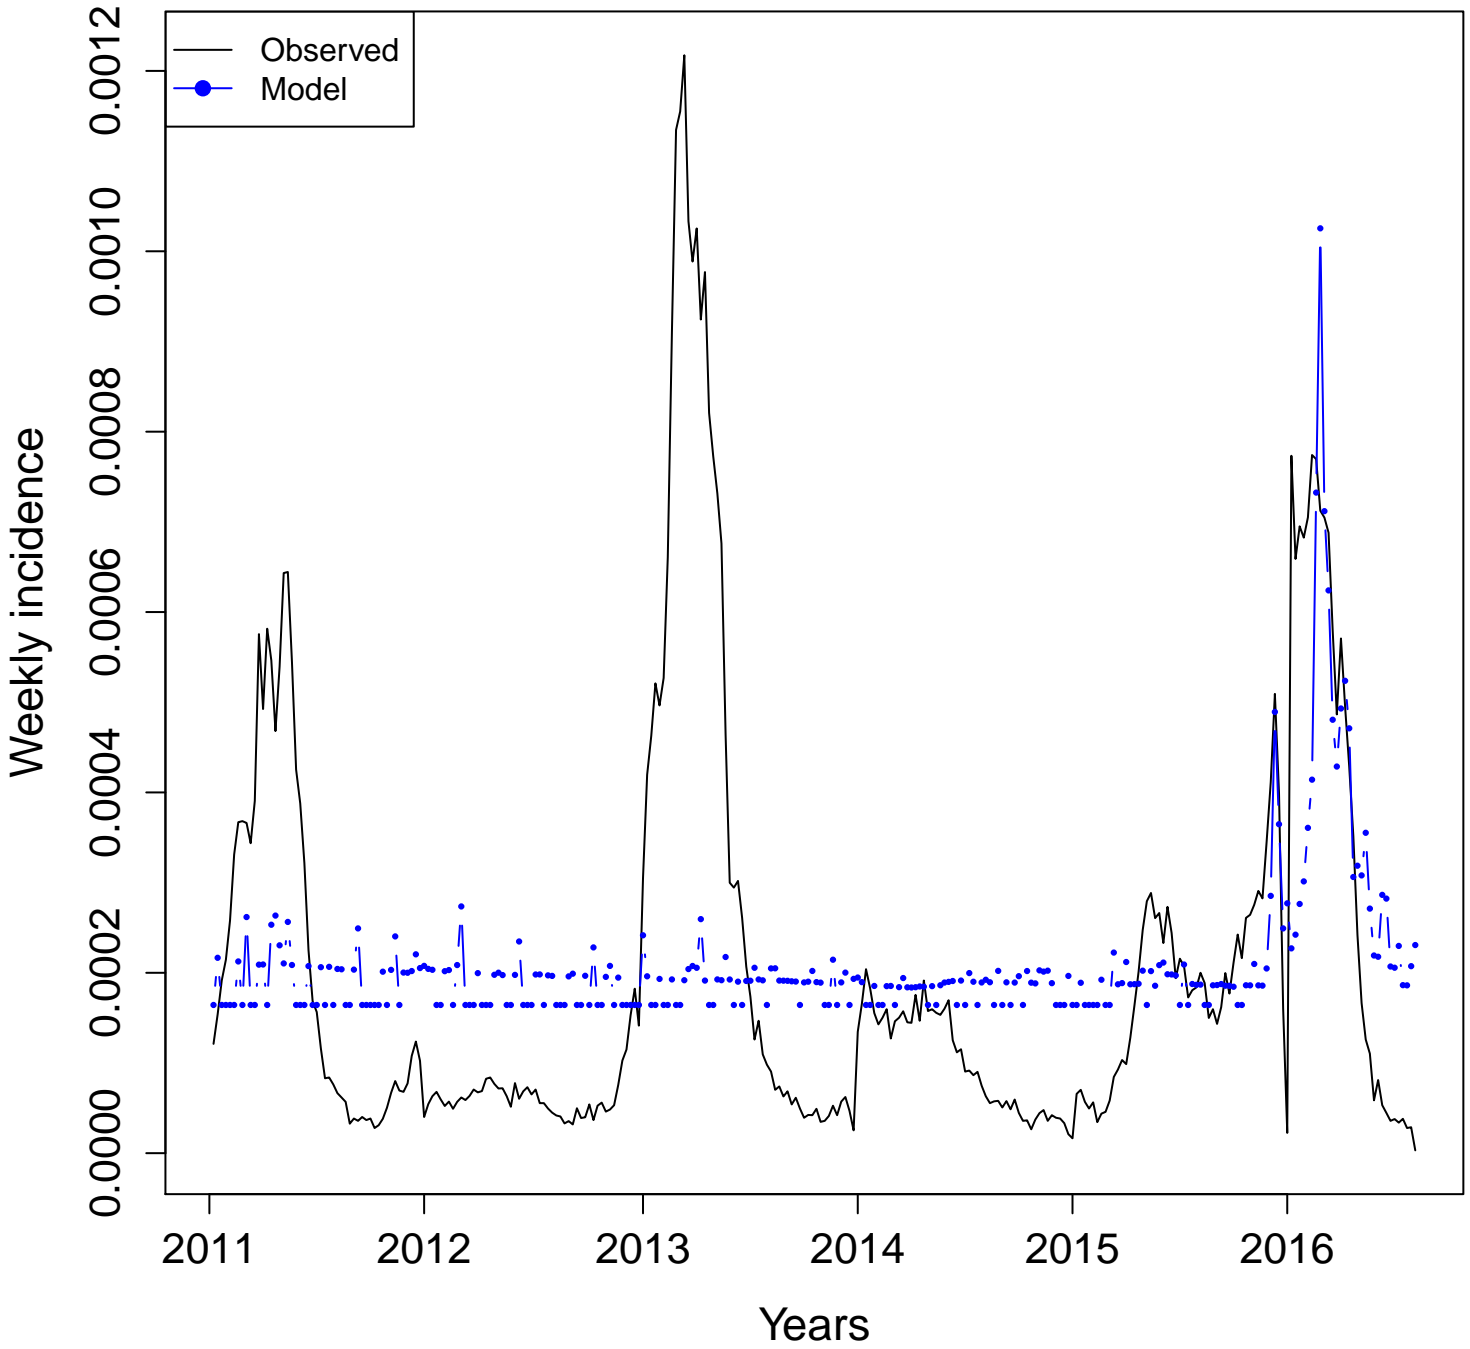

# ES- aedes

Adj. R squared = 0.1763

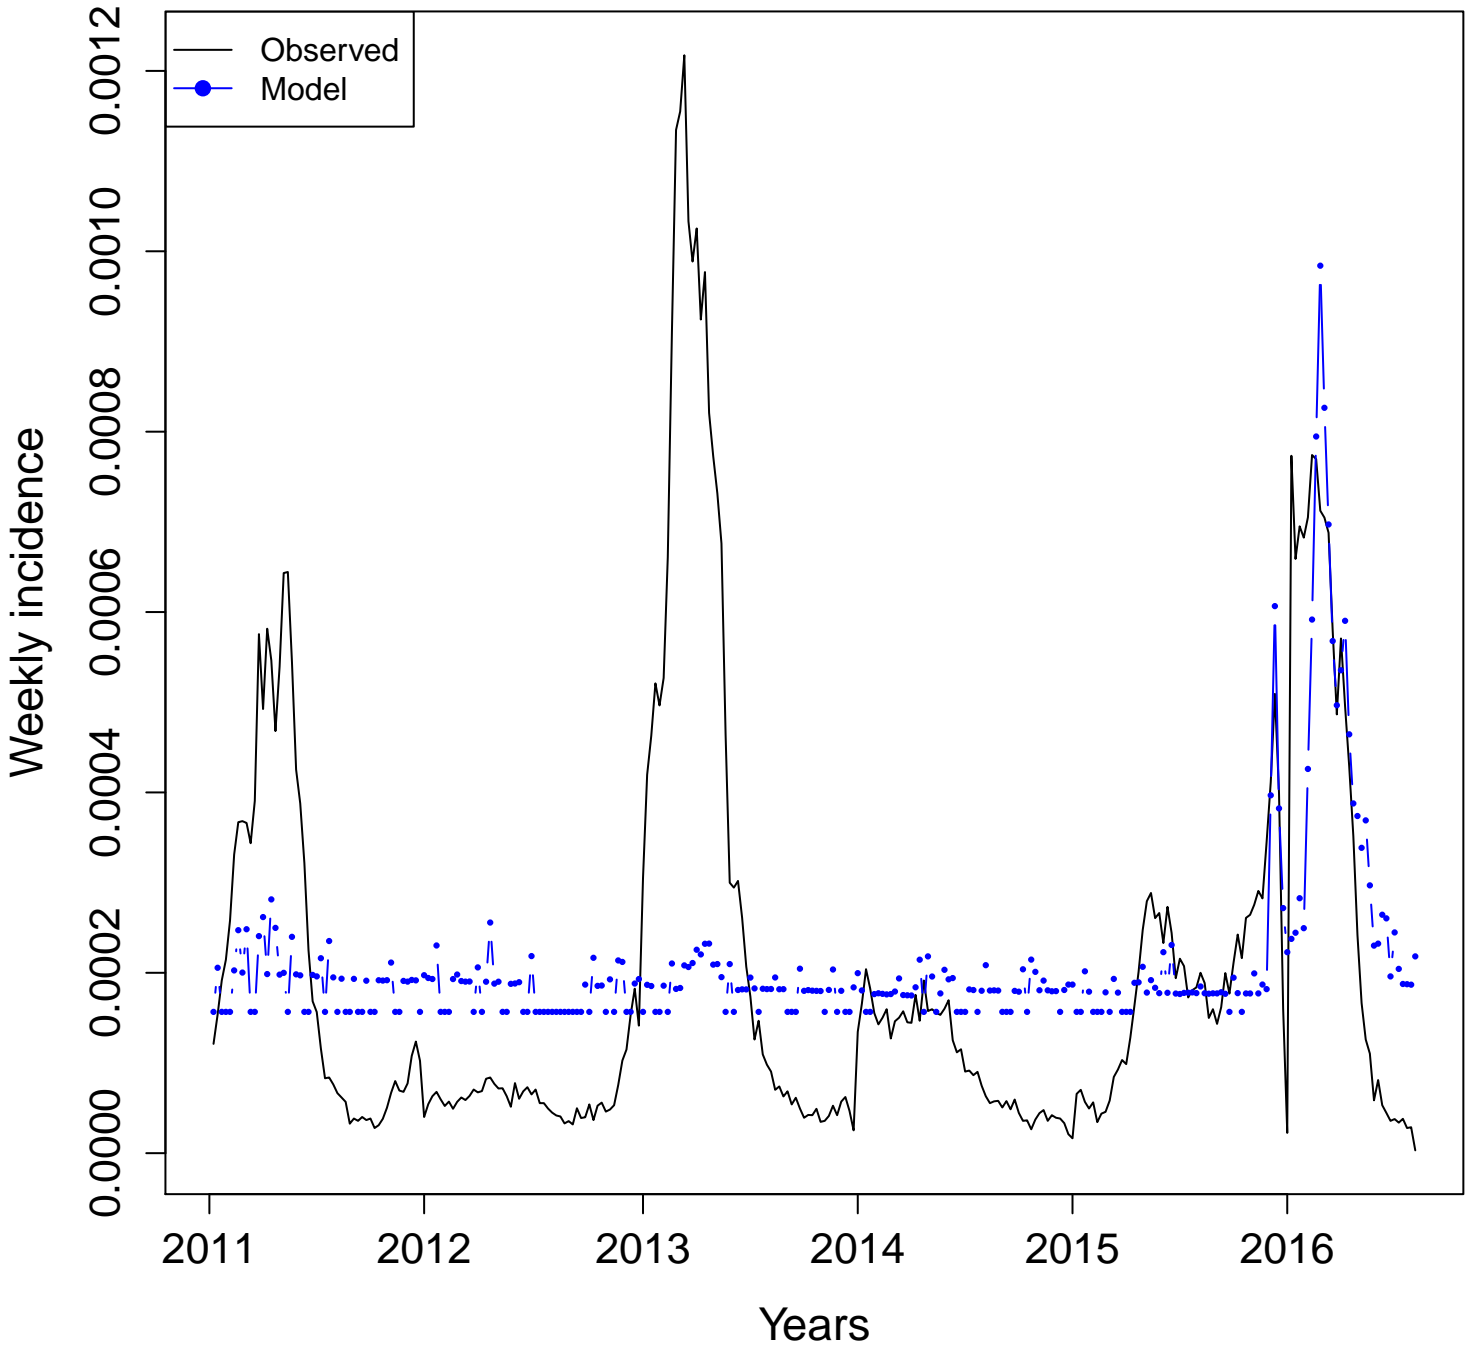

**ES- aegypti**  
**Adj. R squared = 0.1349**

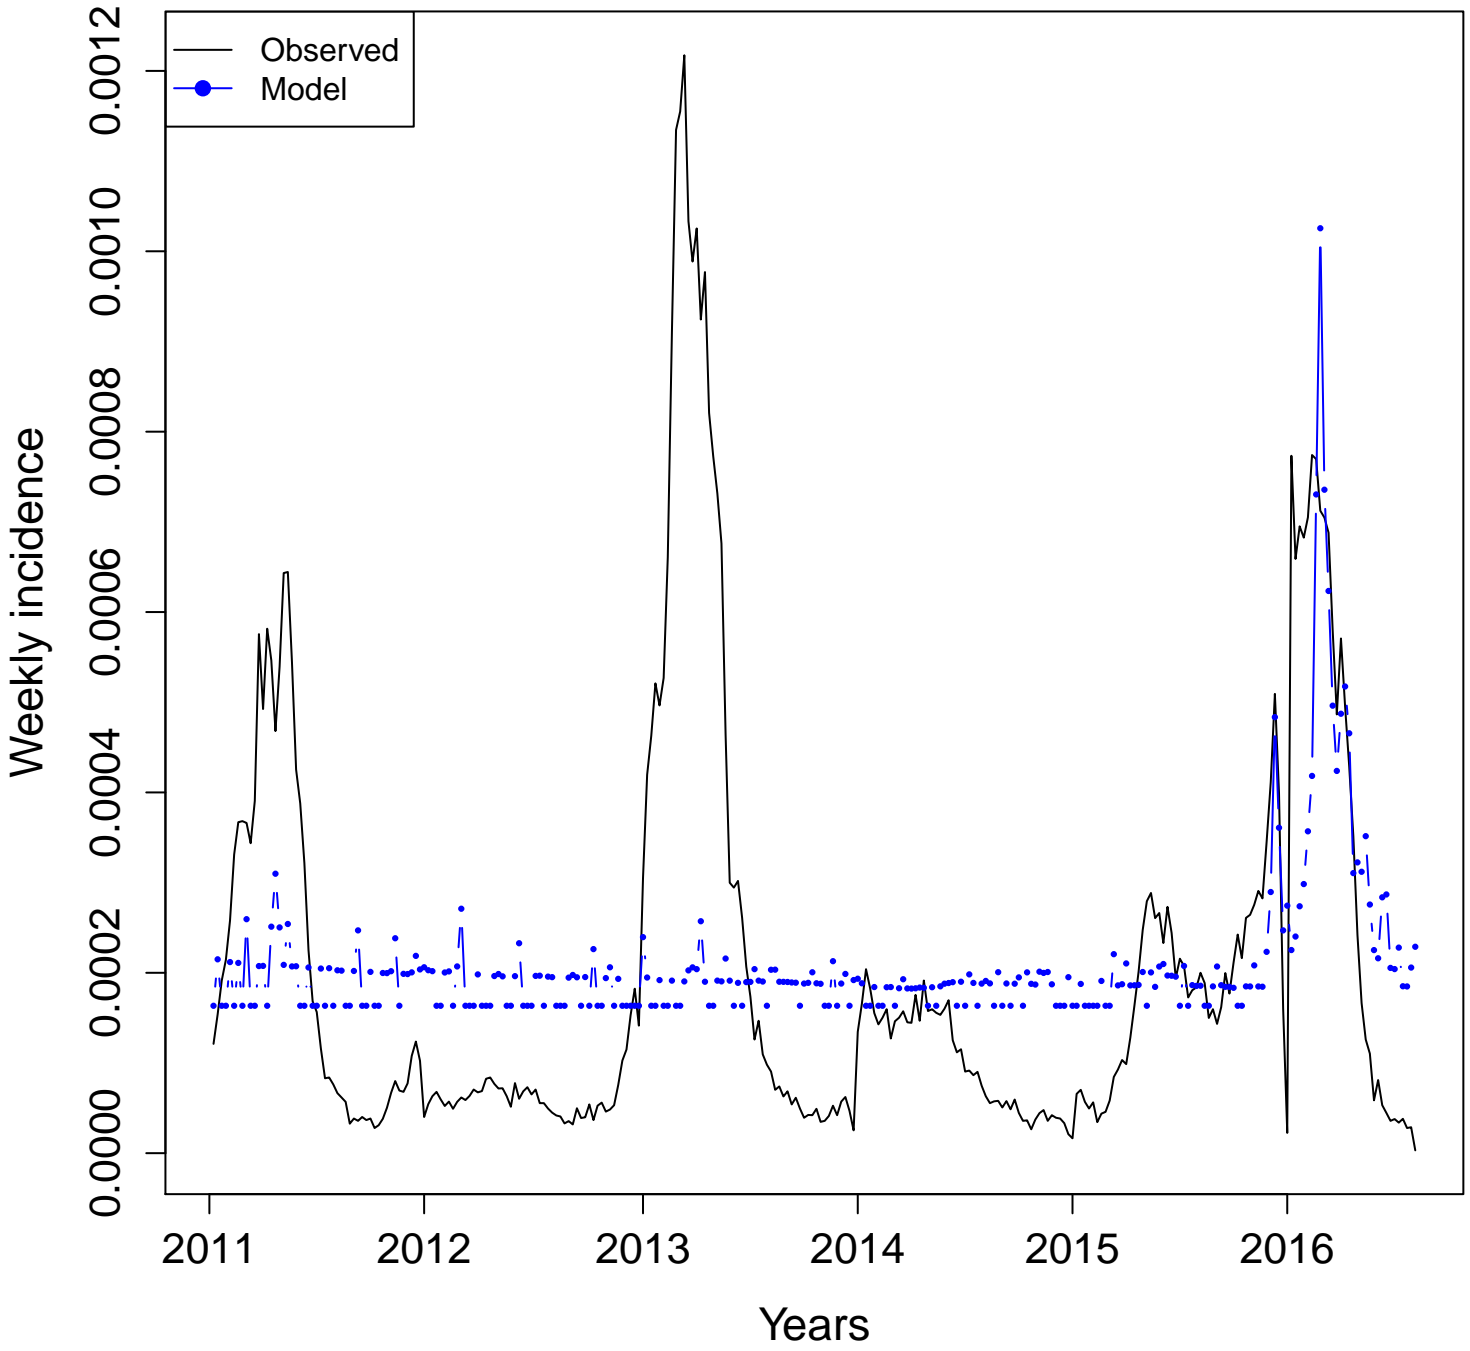

# ES- dengue.fever

Adj. R squared = 0.0782

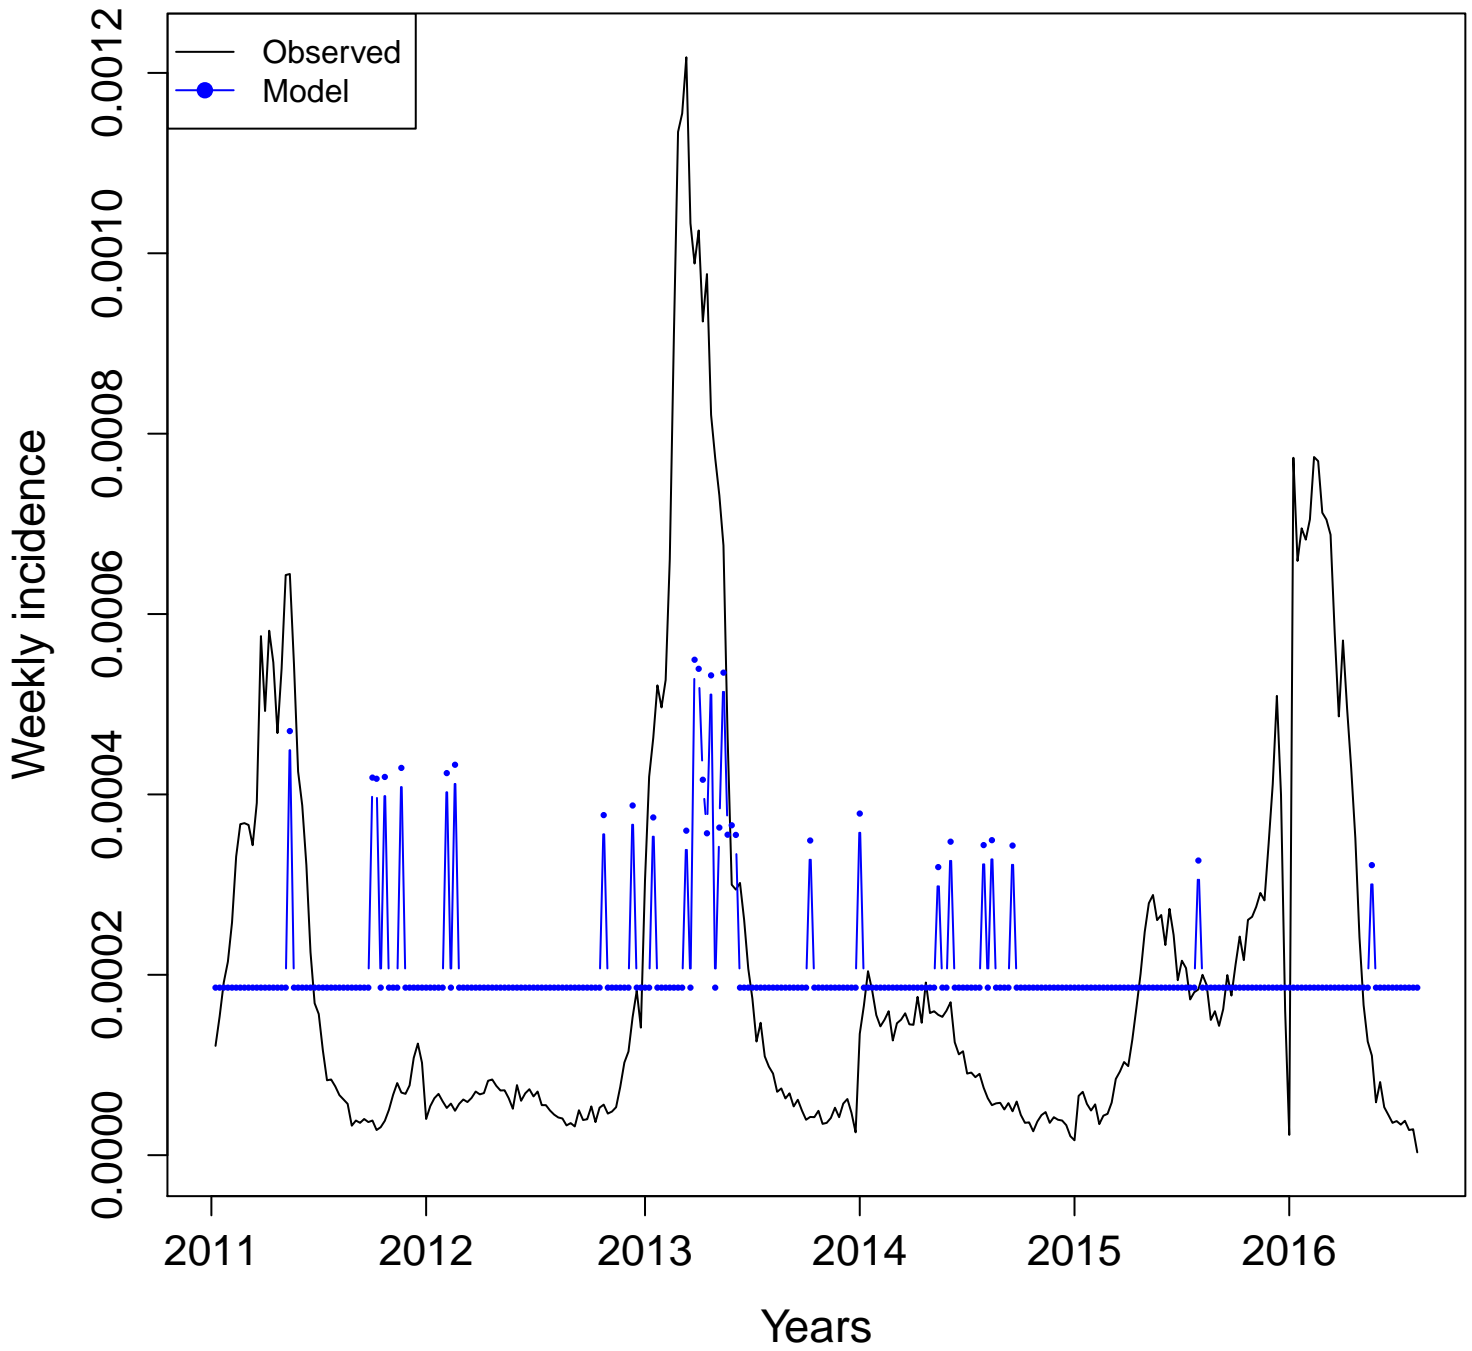

# ES- dengue

Adj. R squared = 0.5461

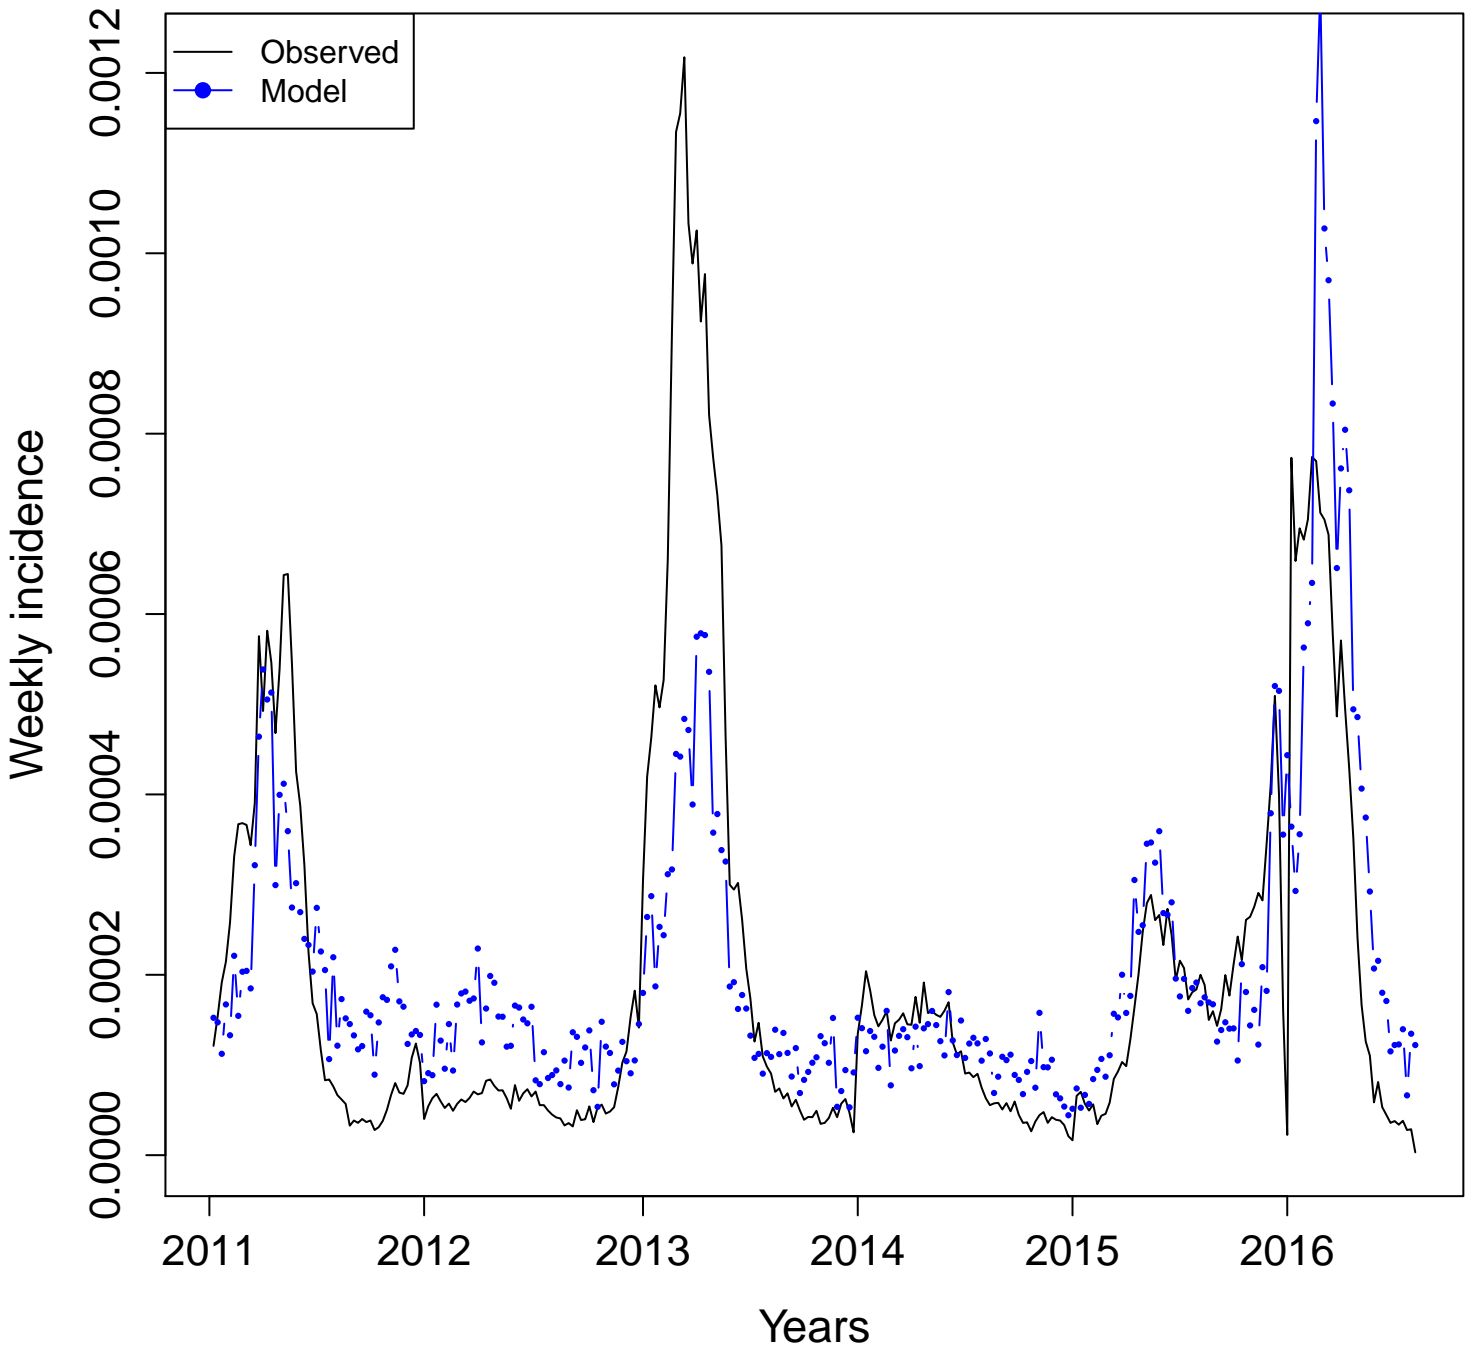

**ES- dengue.sintomas**  
**Adj. R squared = 0.5667**

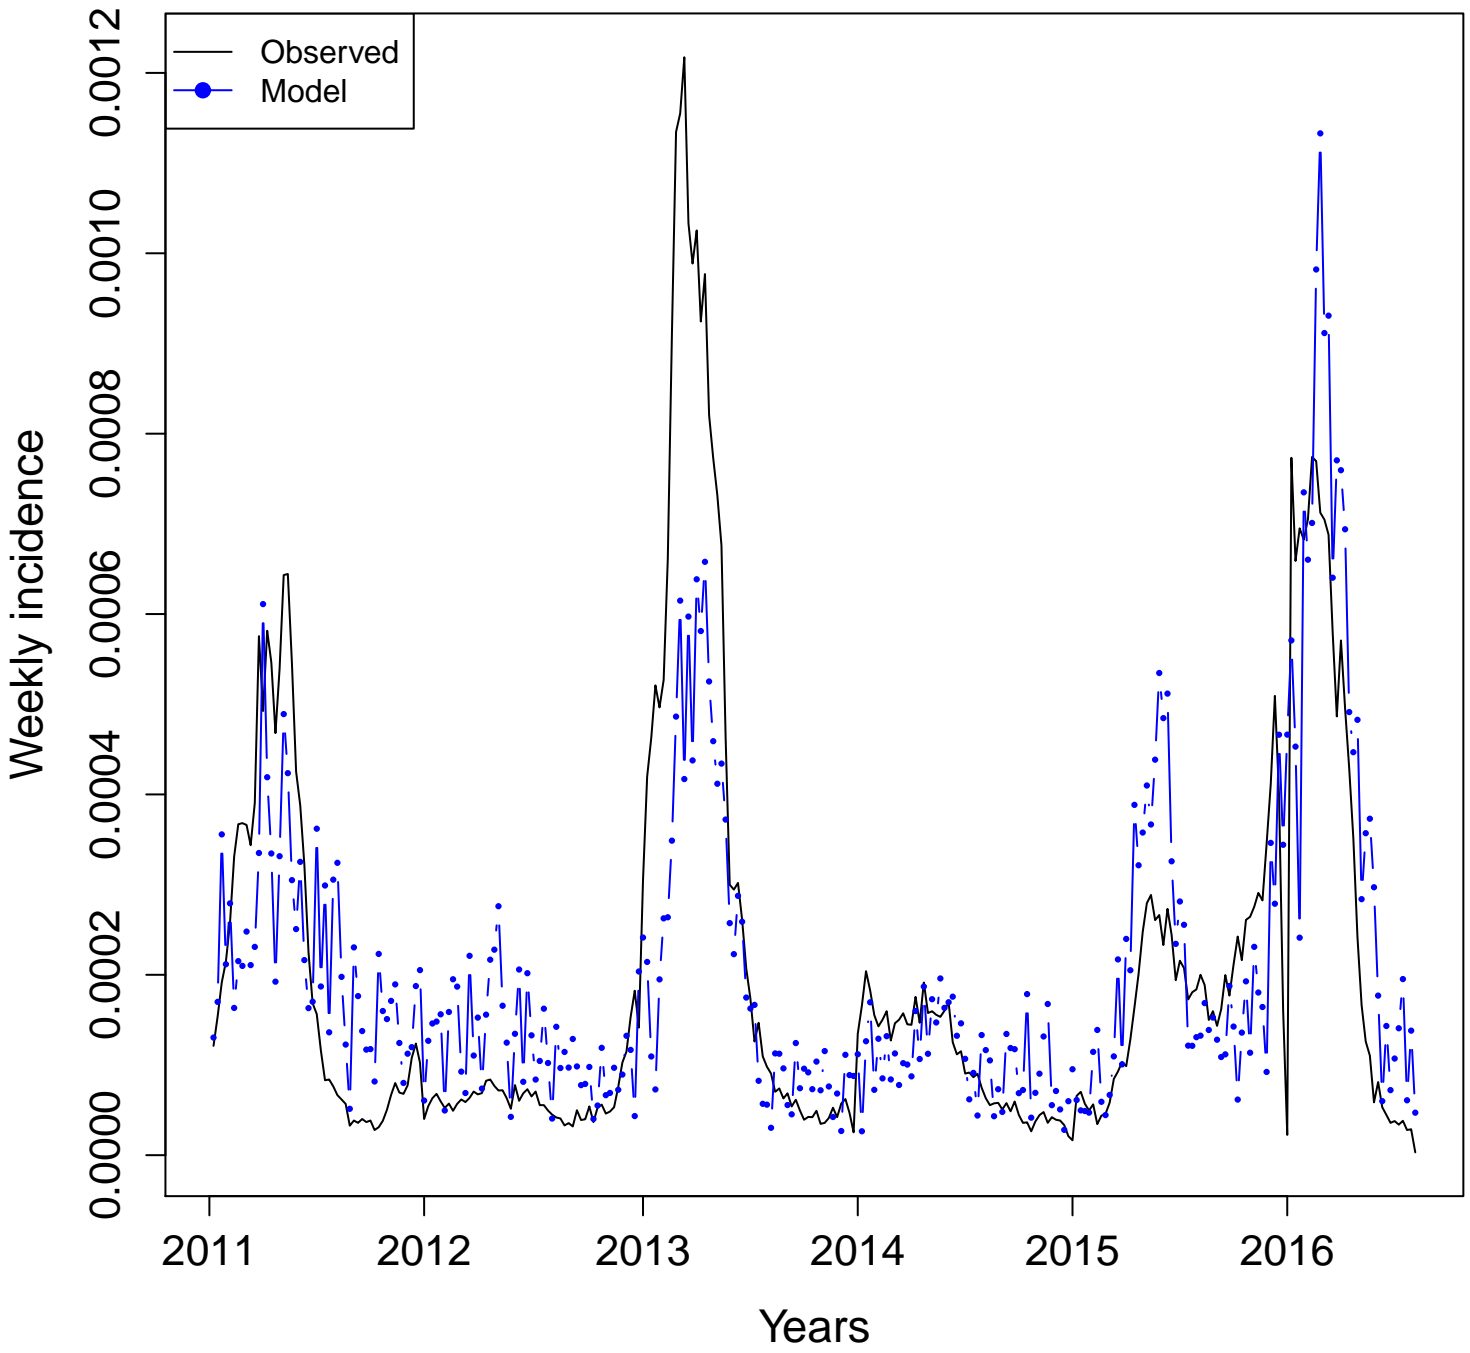

# ES- dengue.virus

Adj. R squared = 0.2024

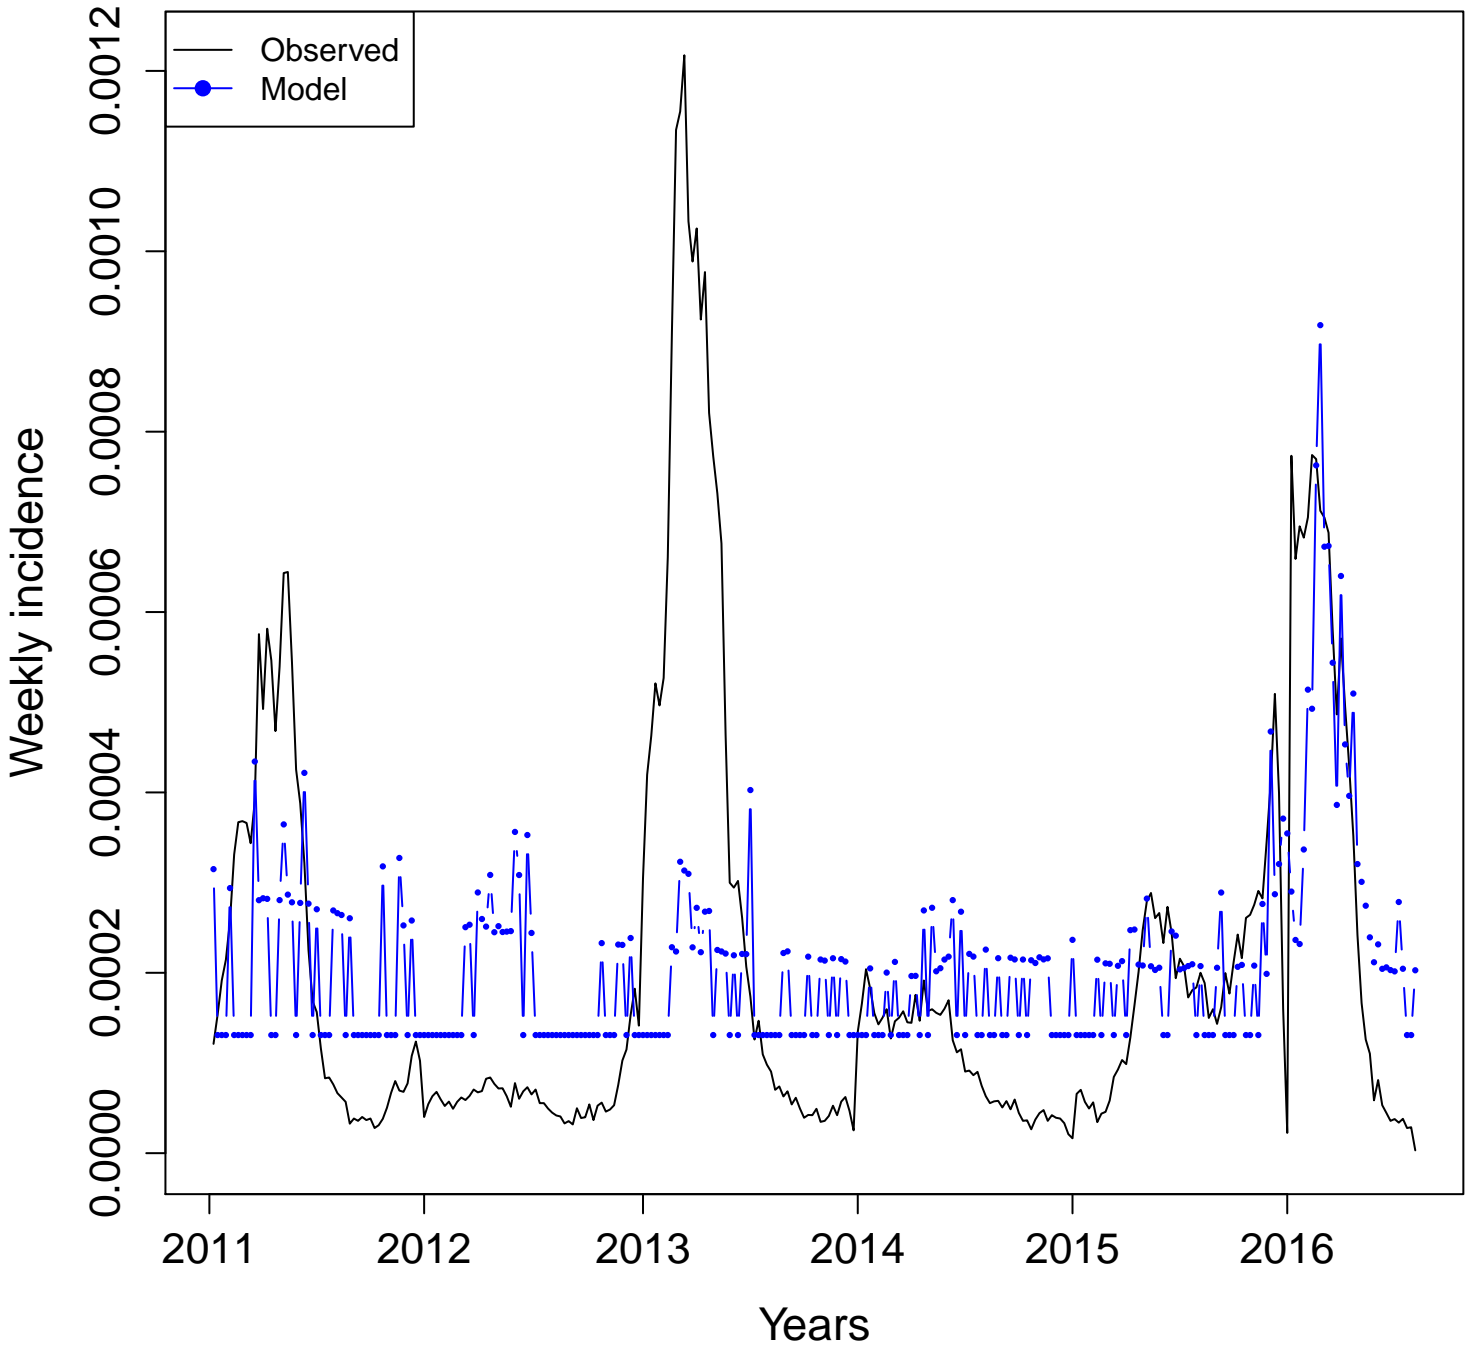



**ES- mosquito.dengue**  
**Adj. R squared = 0.2673**

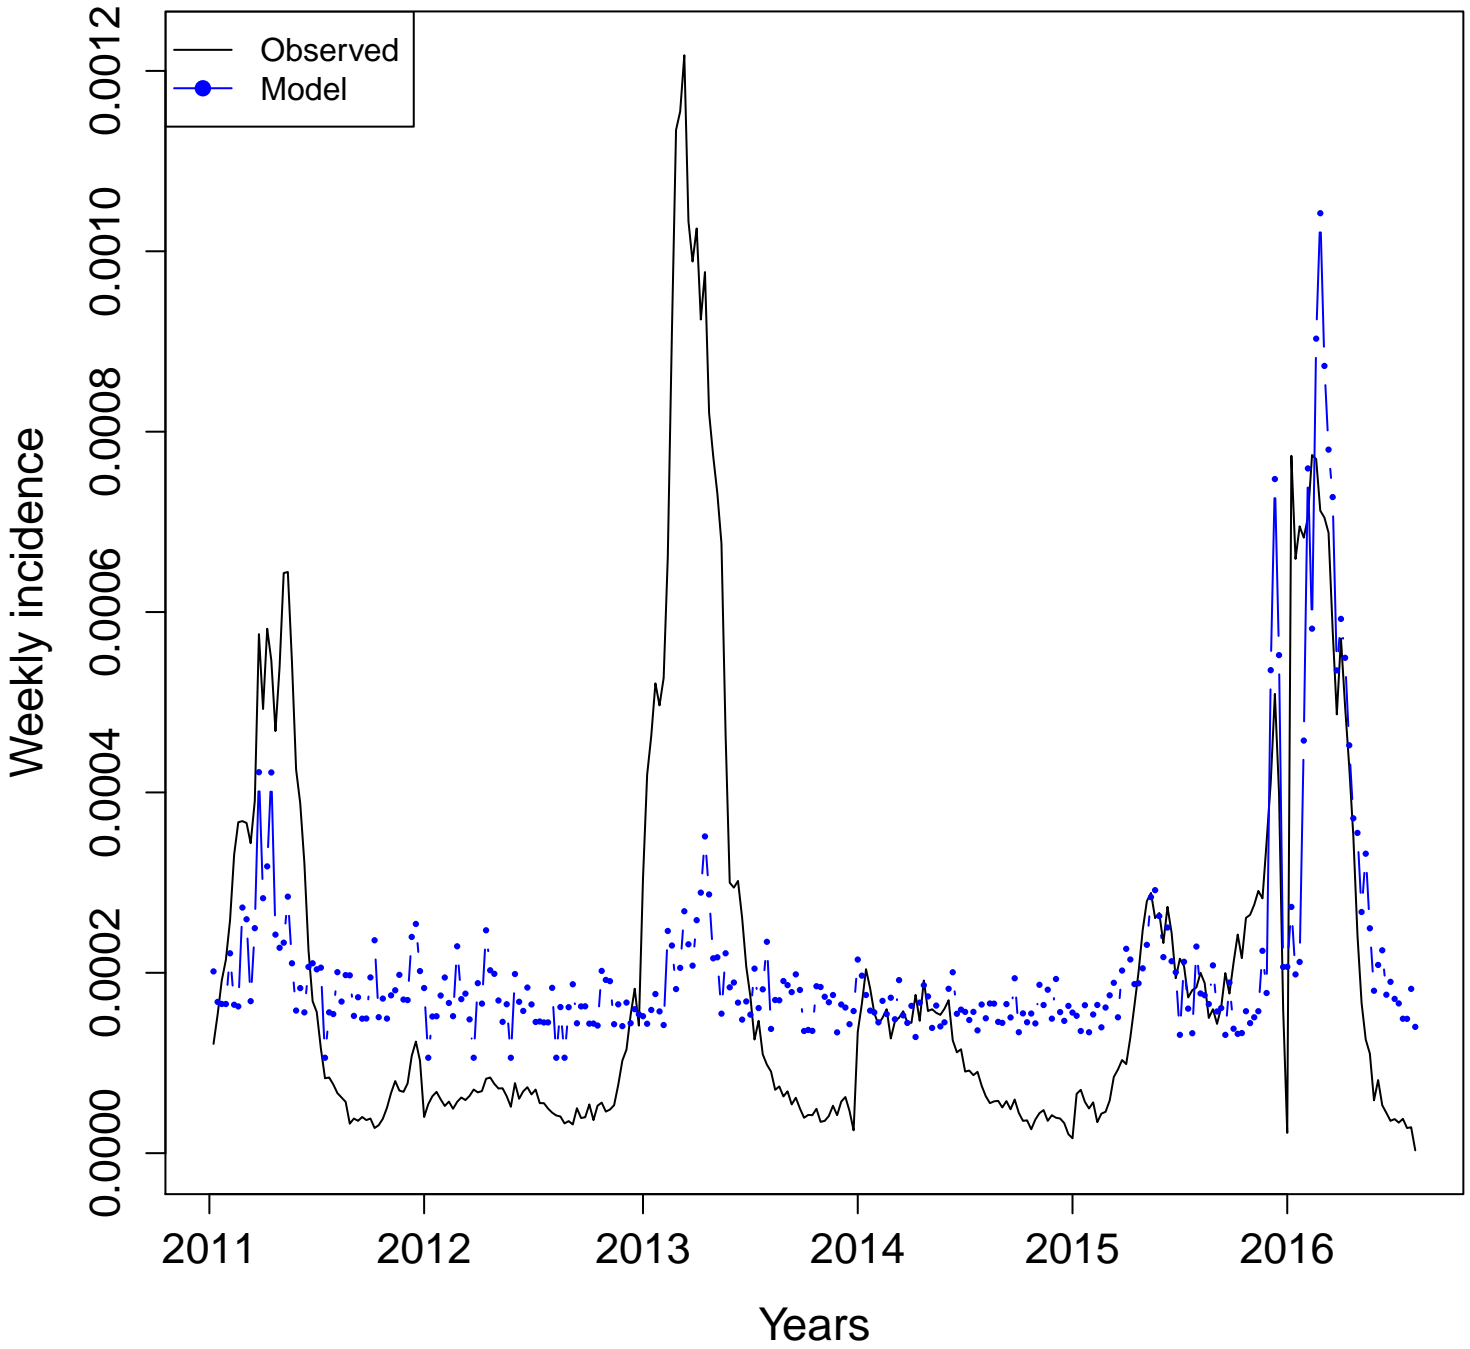

# ES- mosquito

Adj. R squared = 0.2185

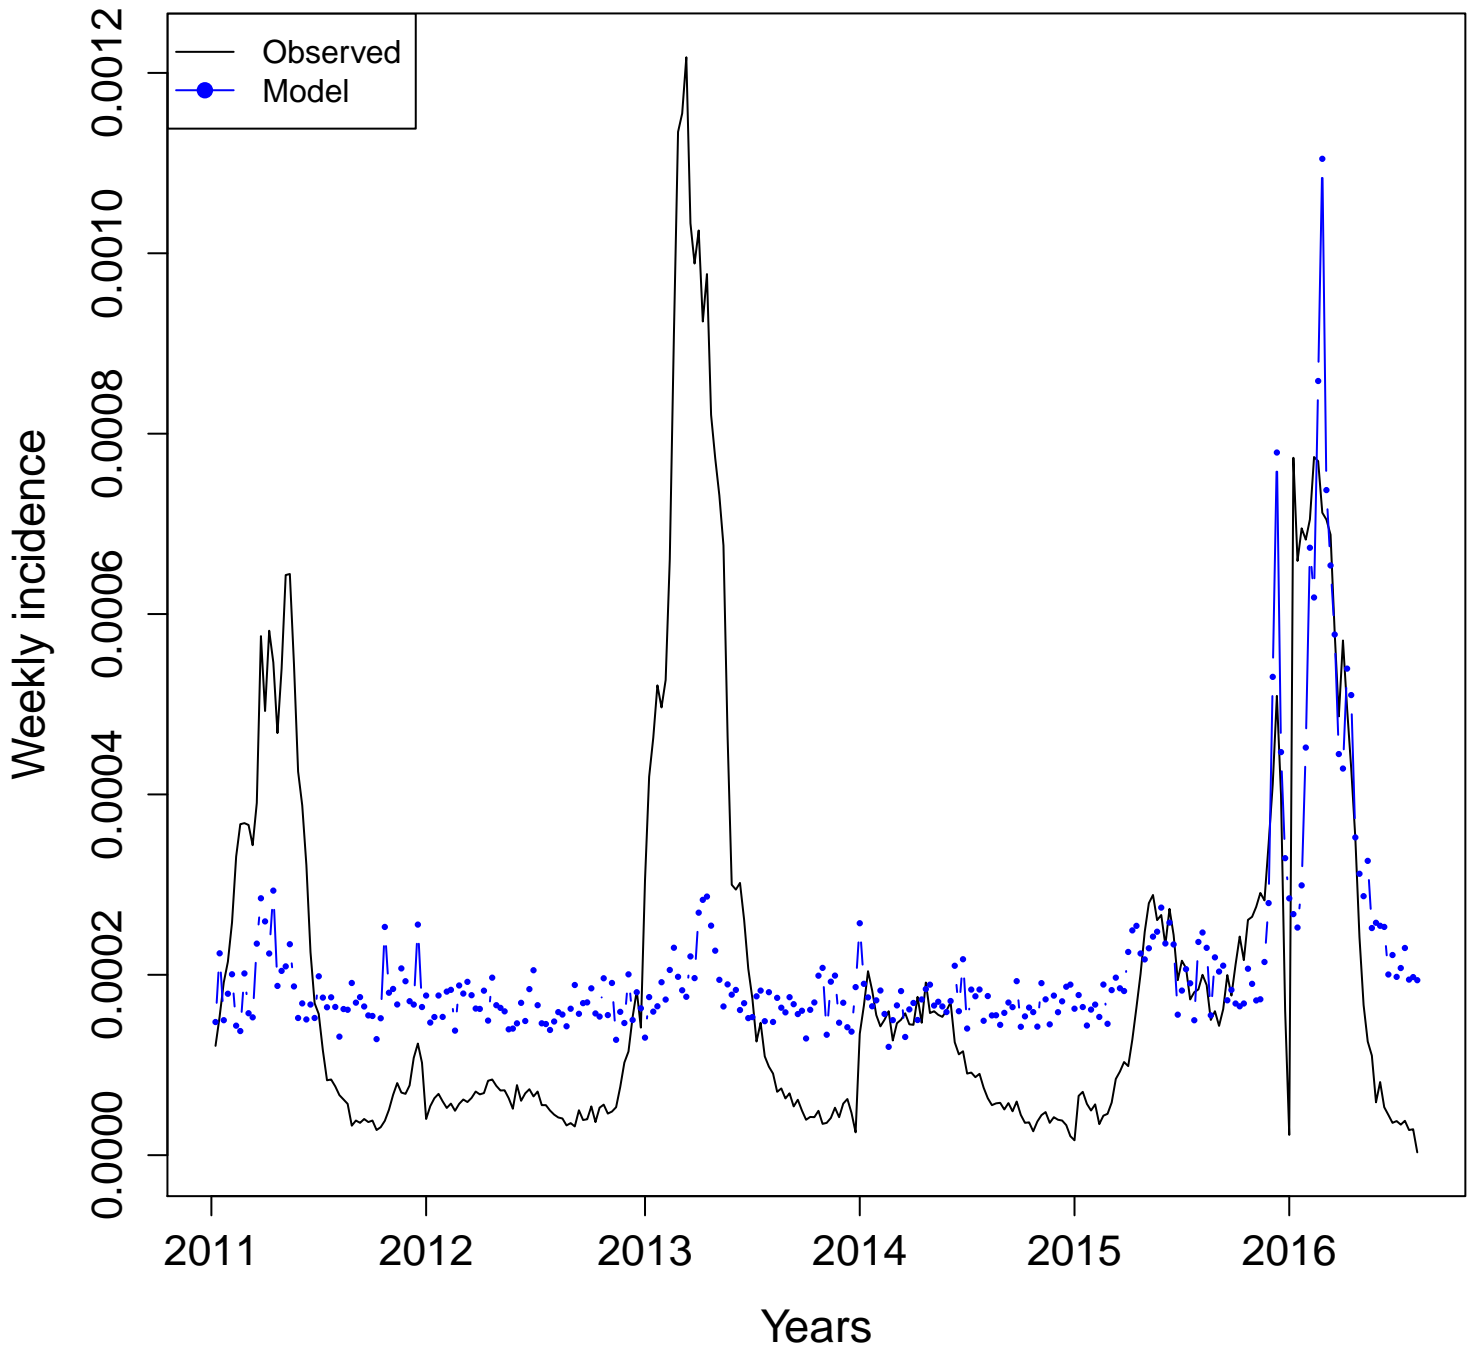

# ES- sintomas.da.dengue

Adj. R squared = 0.5118

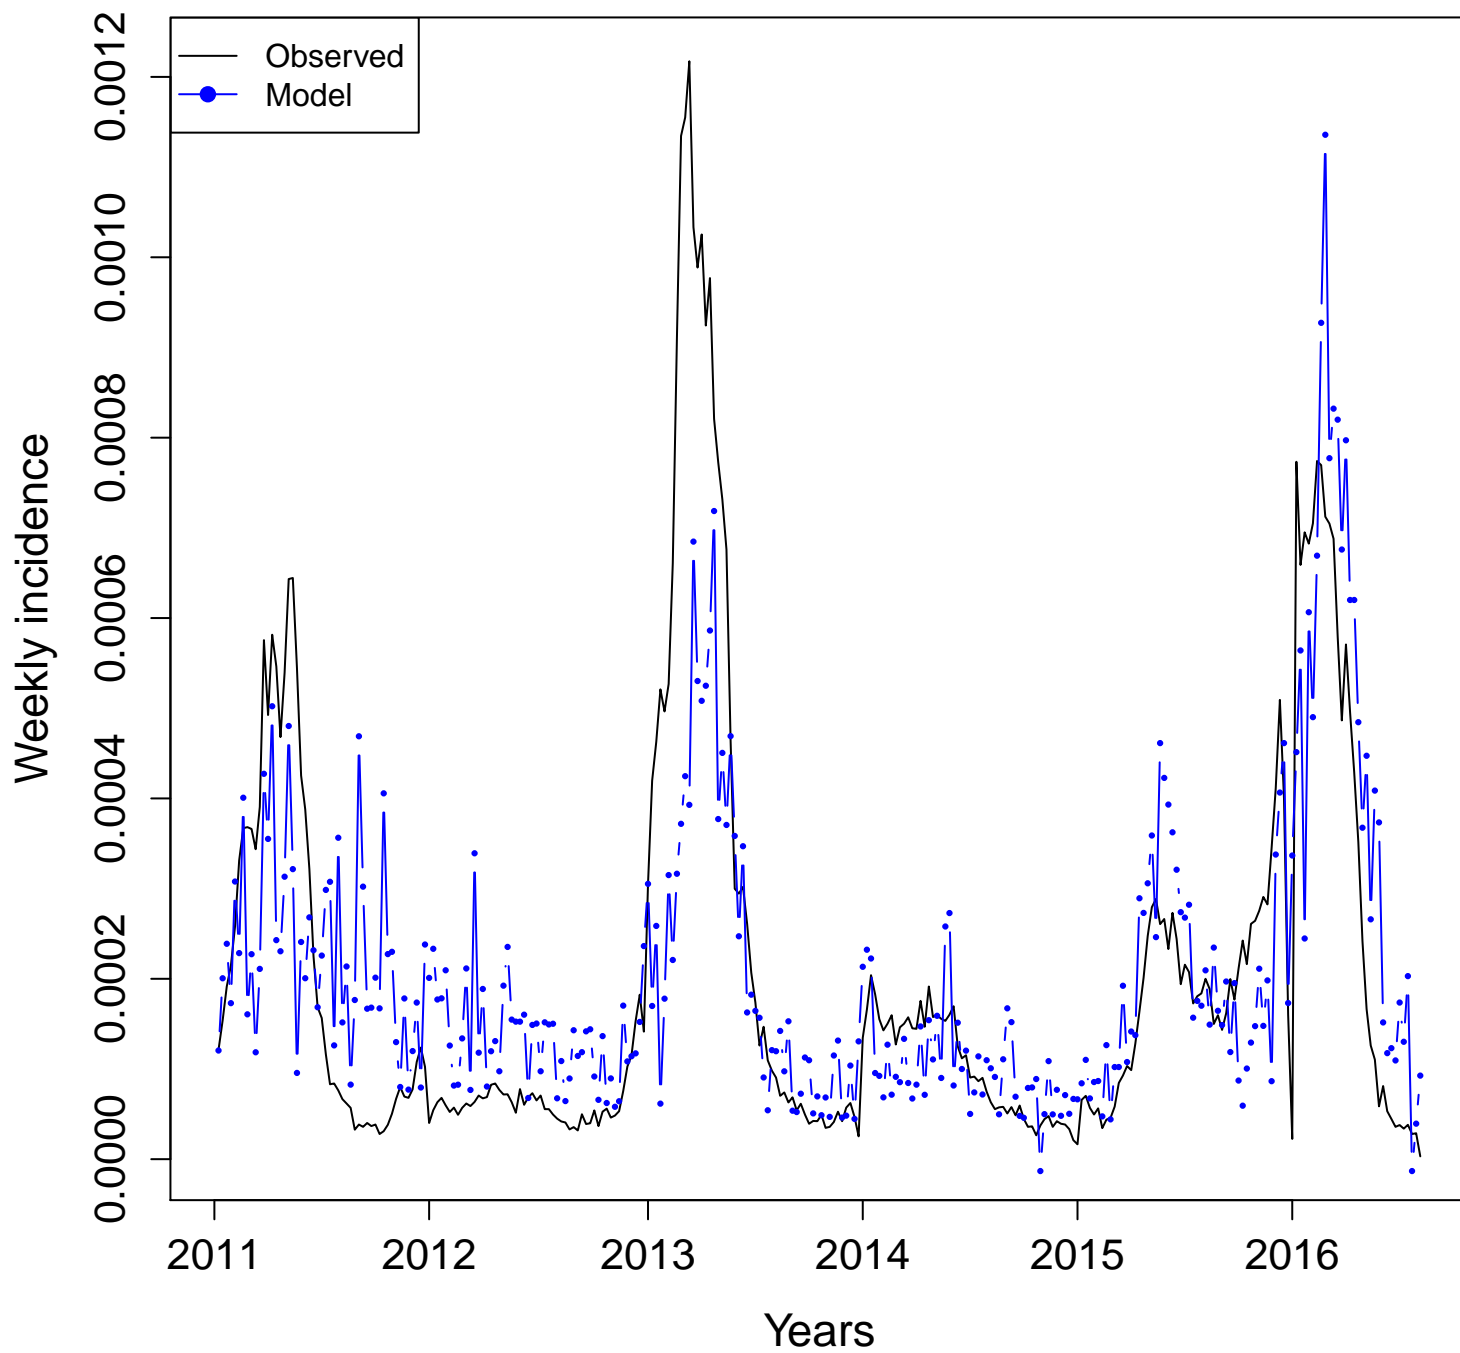

## Goiás (GO)

# Dengue incidence vs. Google Health Trends (2011–2016)

### Definitions:

- **Combined terms:**
  - **All:** model with all the available terms.  $n =$  number of terms
  - **Four:** model with "dengue", "dengue sintomas", "aedes", and "mosquito".
  - **Uncorrelated:** model with non-correlated terms.  $n =$  number of uncorrelated terms
- **Individual terms:** Plots developed with one term at a time.
- Terms for all and uncorrelated models can be found in additional file 3.

**Combined terms**  
**Adjusted R squared**

**Goiás (GO)**

All  
(n = 11)

BR-GO  
Adj. R squared = 0.7853

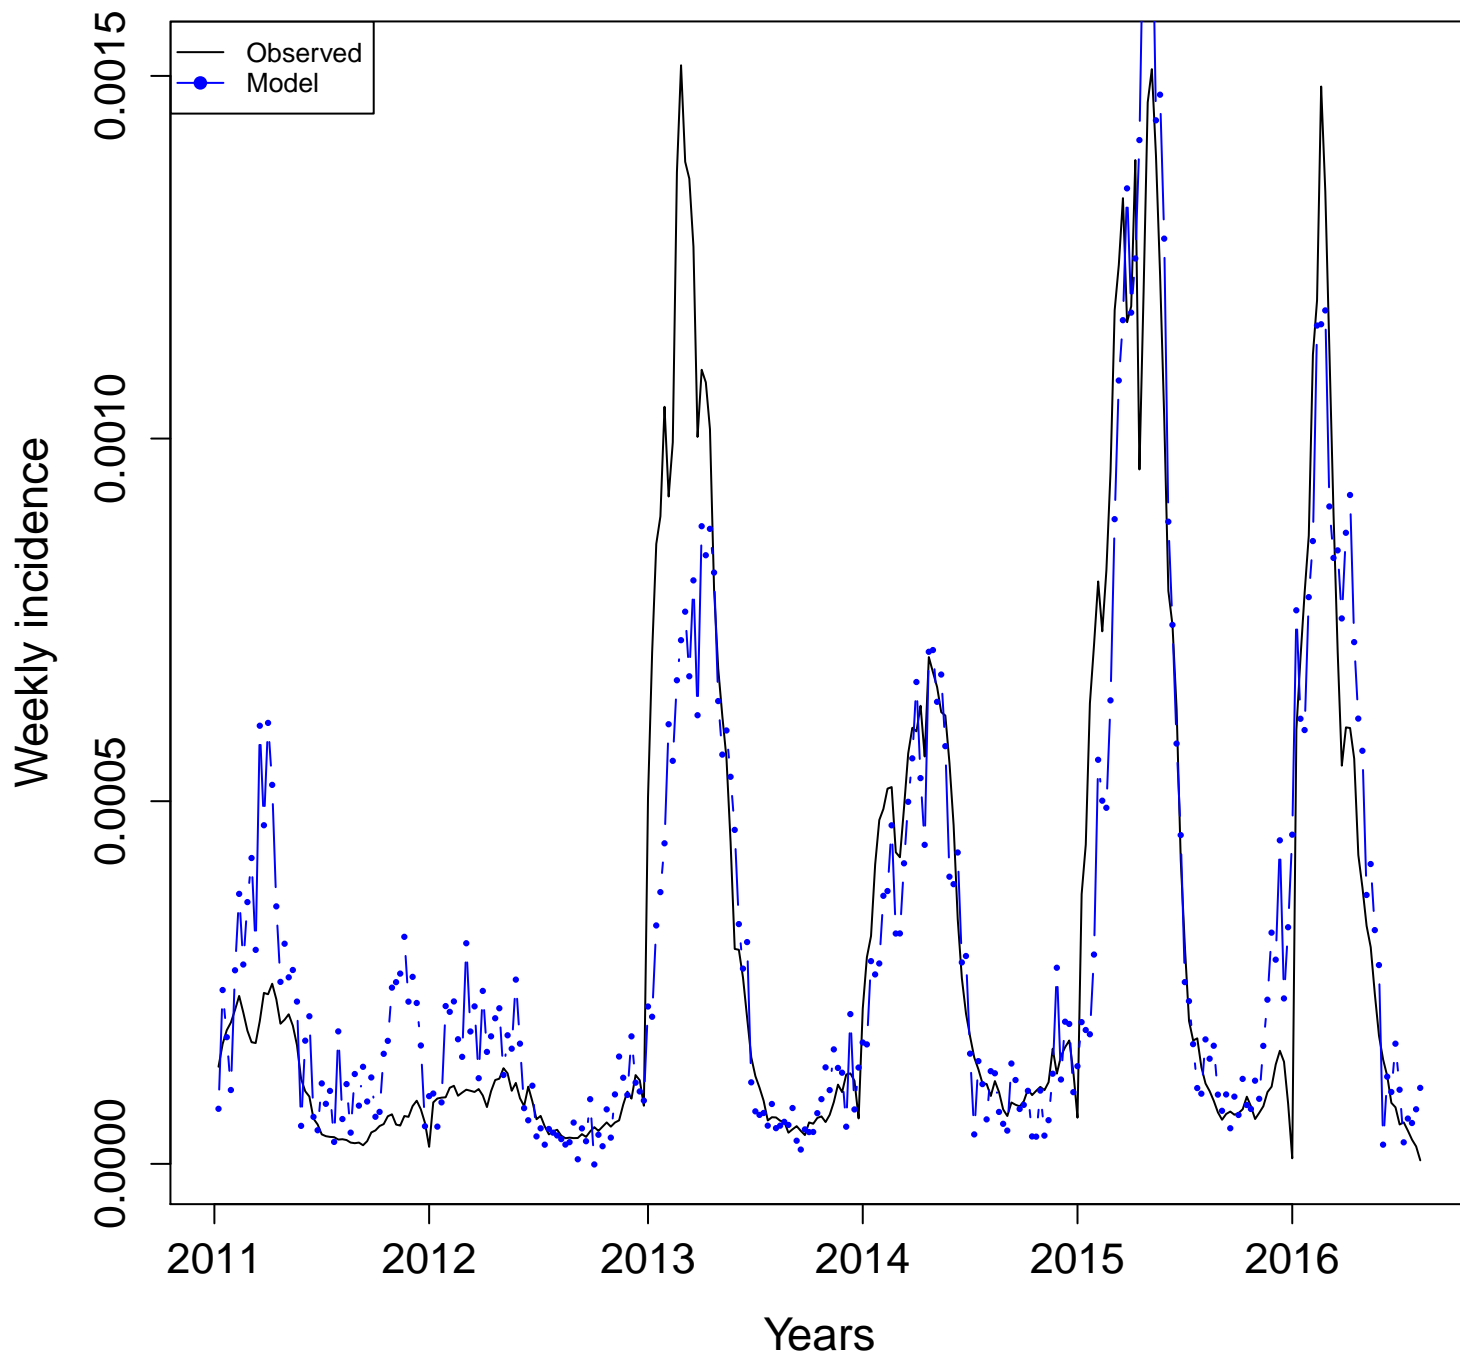

**BR-GO**  
**Adj. R squared = 0.7678**

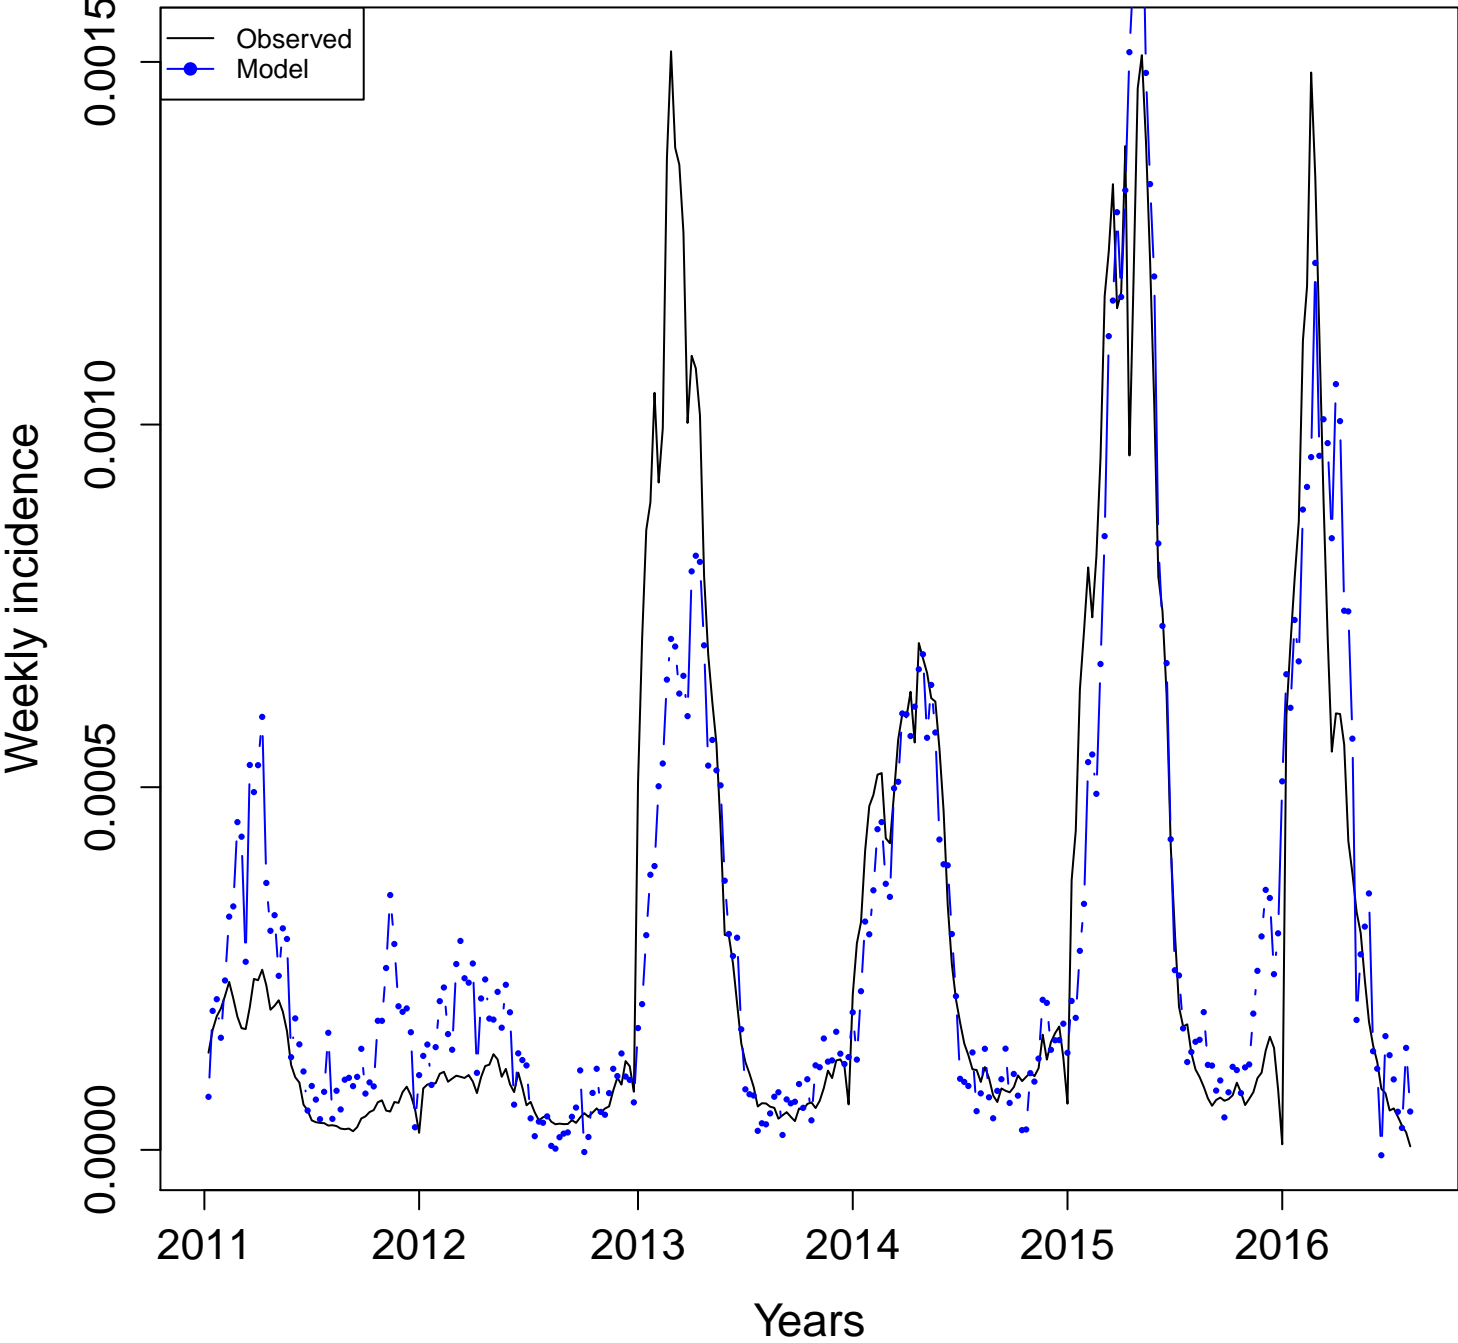

**Uncorrelated  
(n = 3)**

**BR-GO  
Adj. R squared = 0.66**

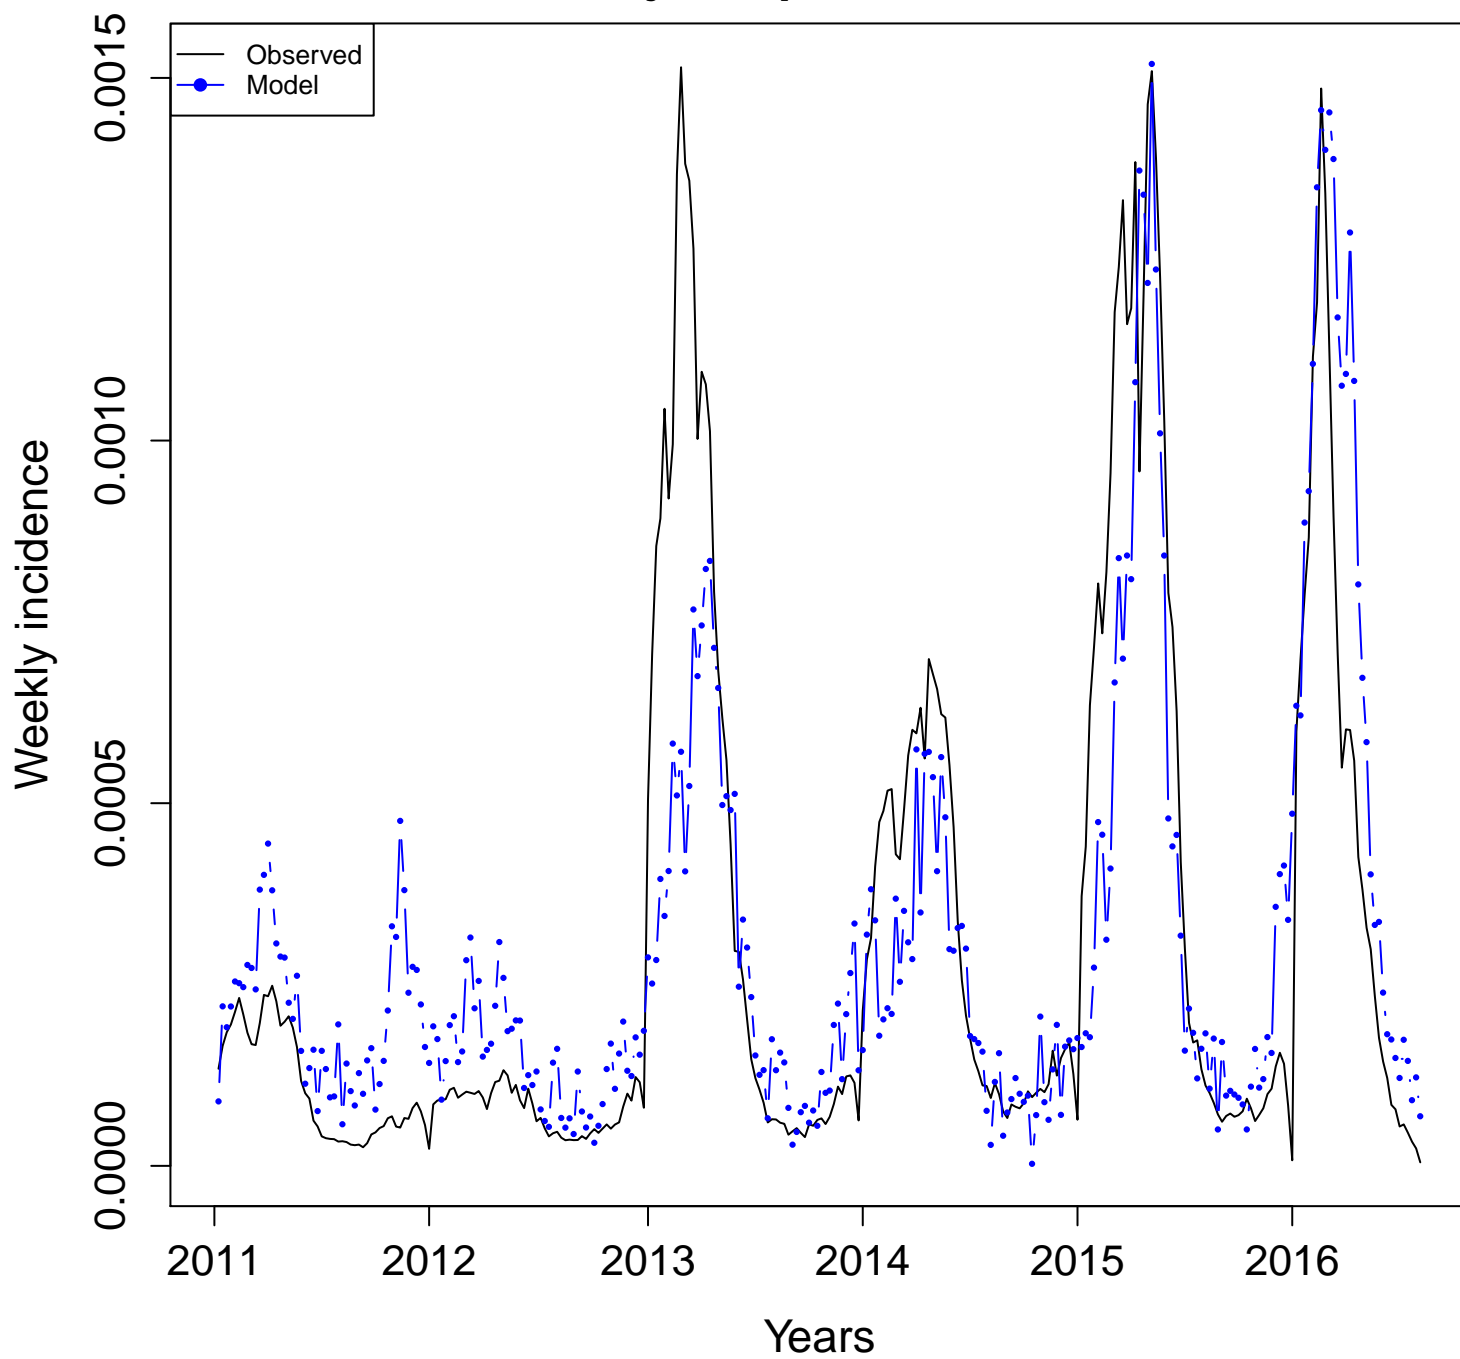



**Individual terms**  
**Adjusted R squared**

**Goiás (GO)**

**GO- aedes.aegypti**  
**Adj. R squared = 0.129**

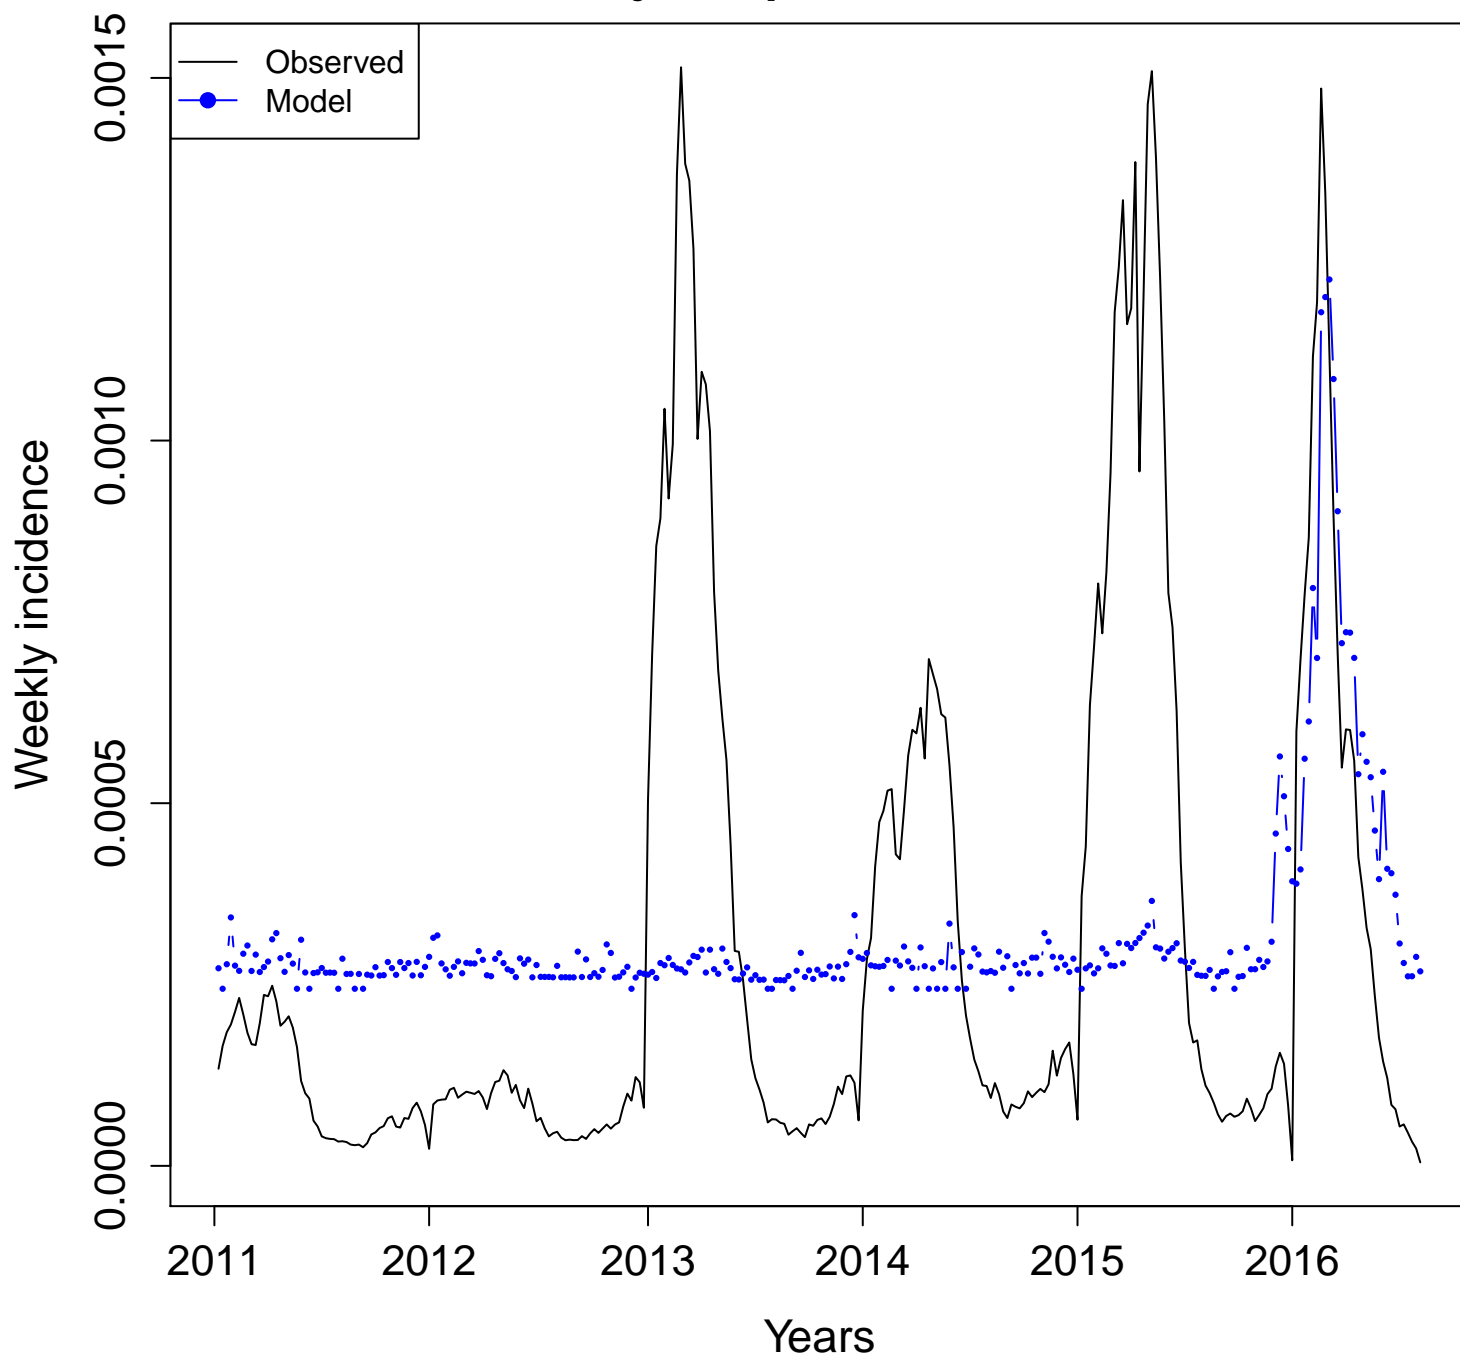

**GO- aedes**  
**Adj. R squared = 0.1348**

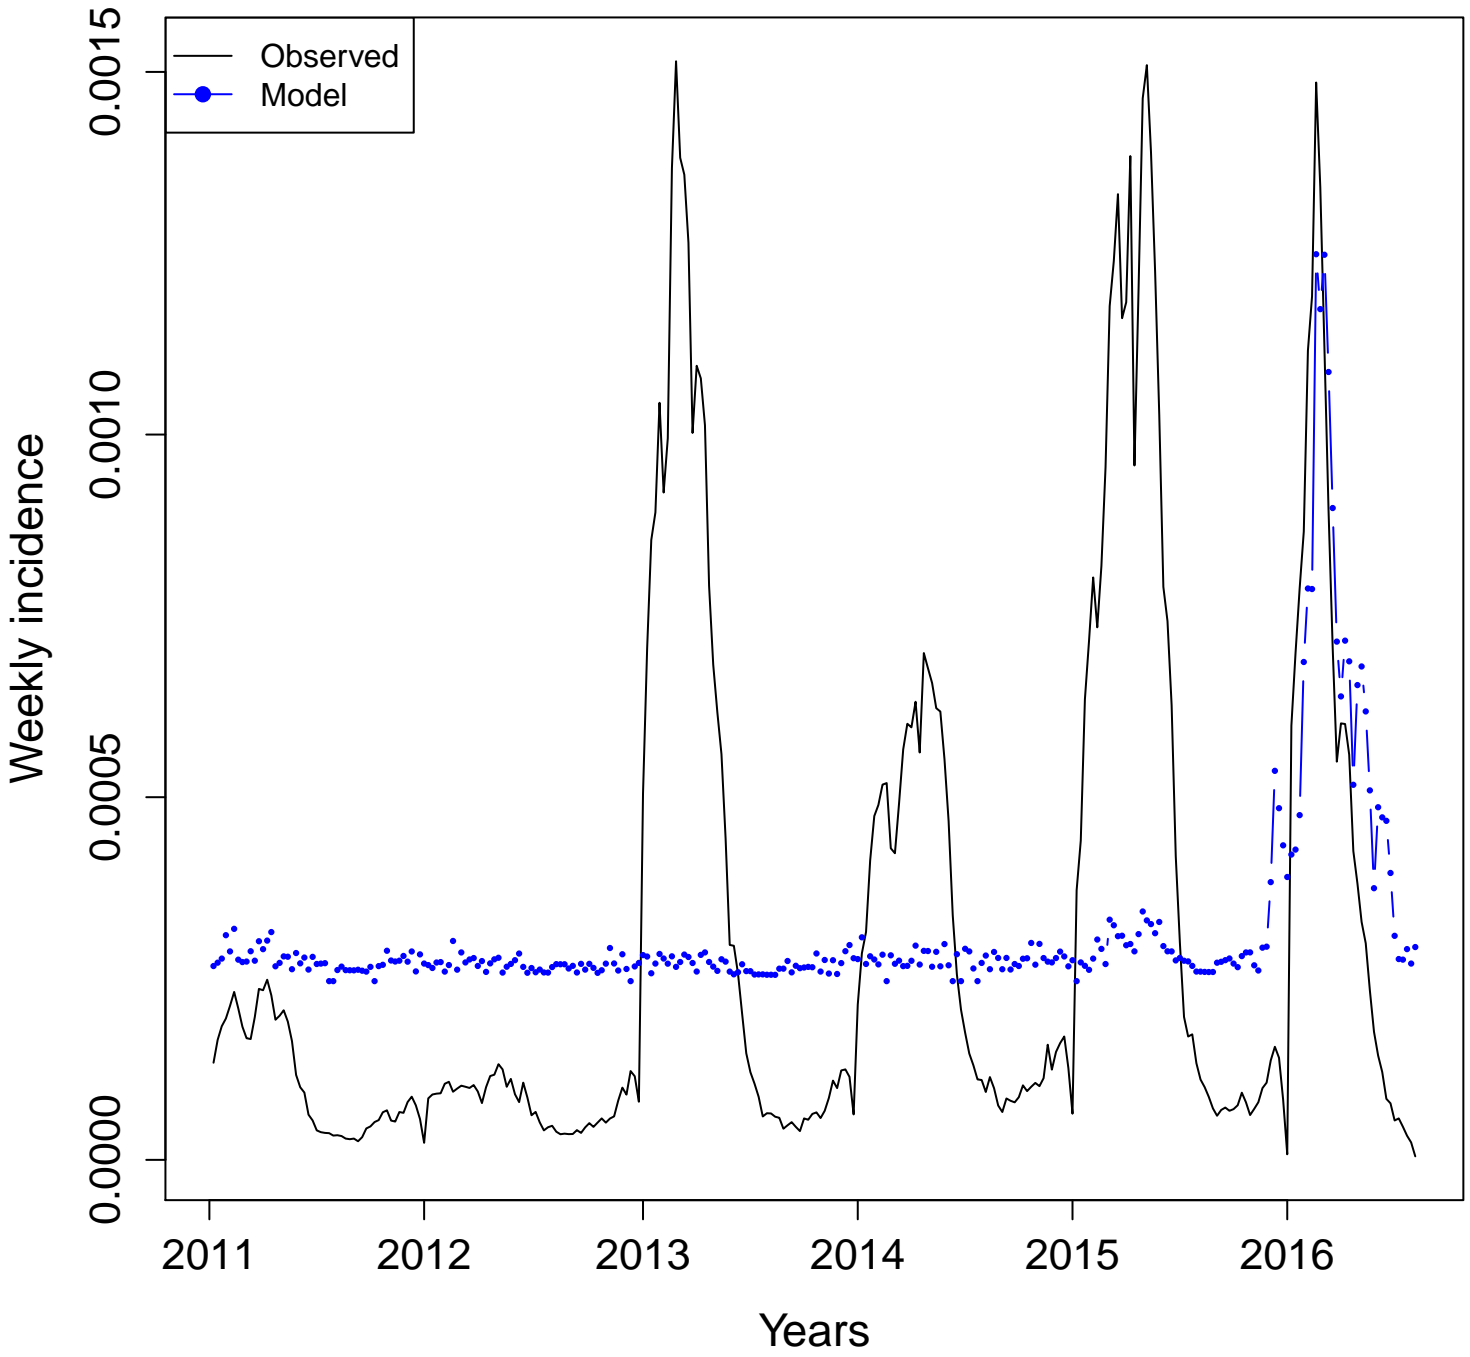

**GO- aegypti**  
**Adj. R squared = 0.1276**

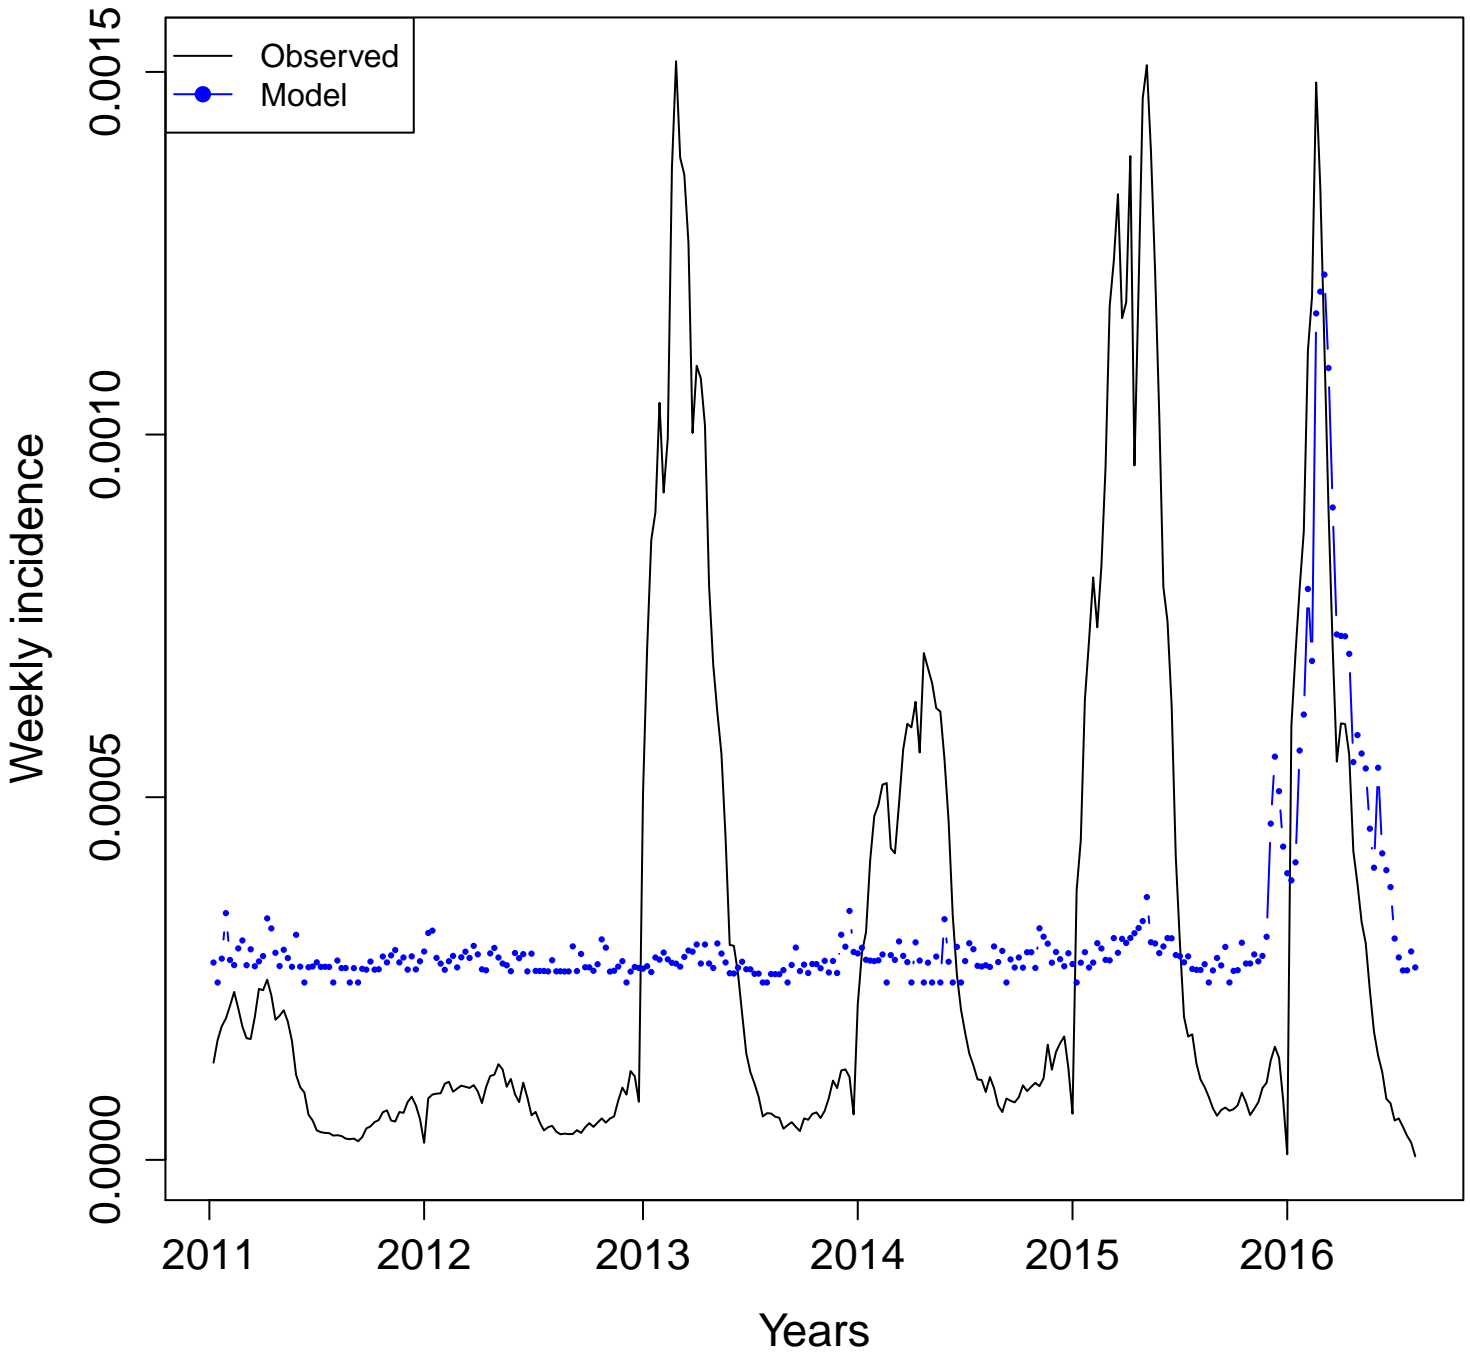

**GO- dengue.fever**  
**Adj. R squared = 0.0936**

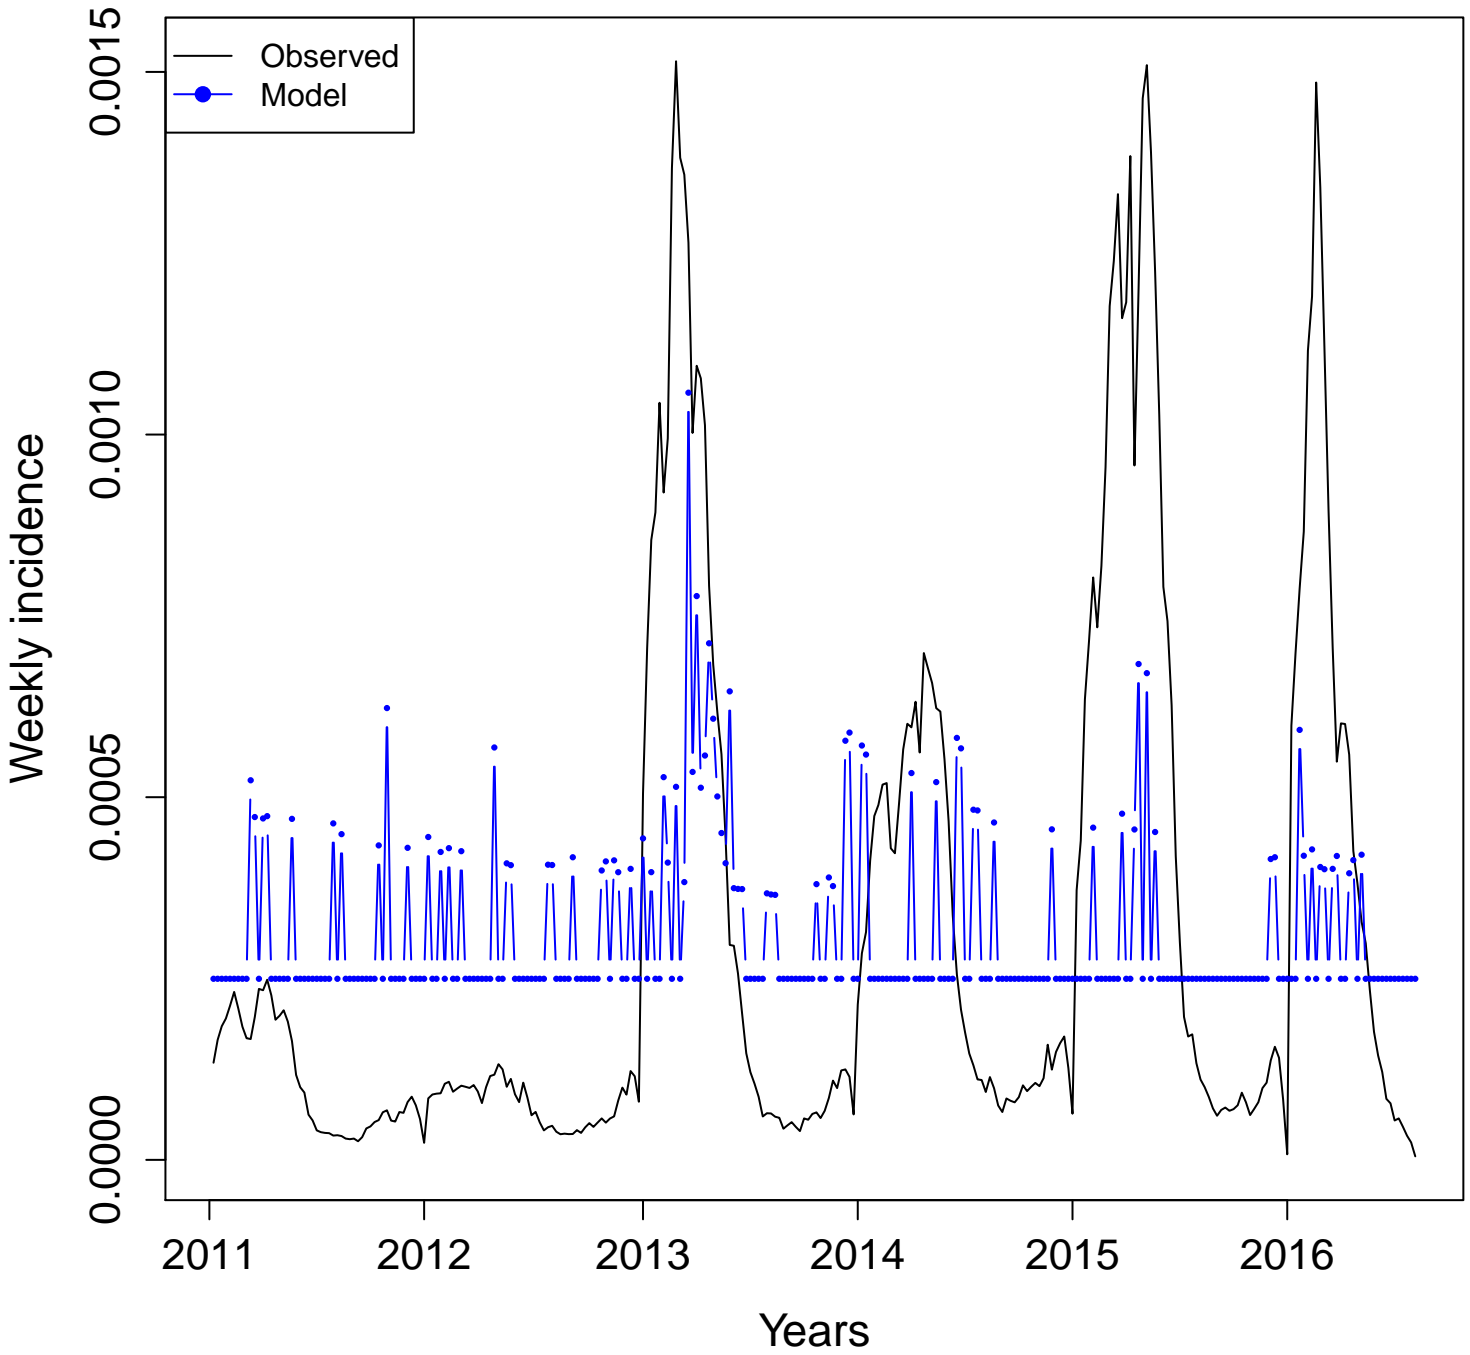

# GO- dengue

Adj. R squared = 0.6051

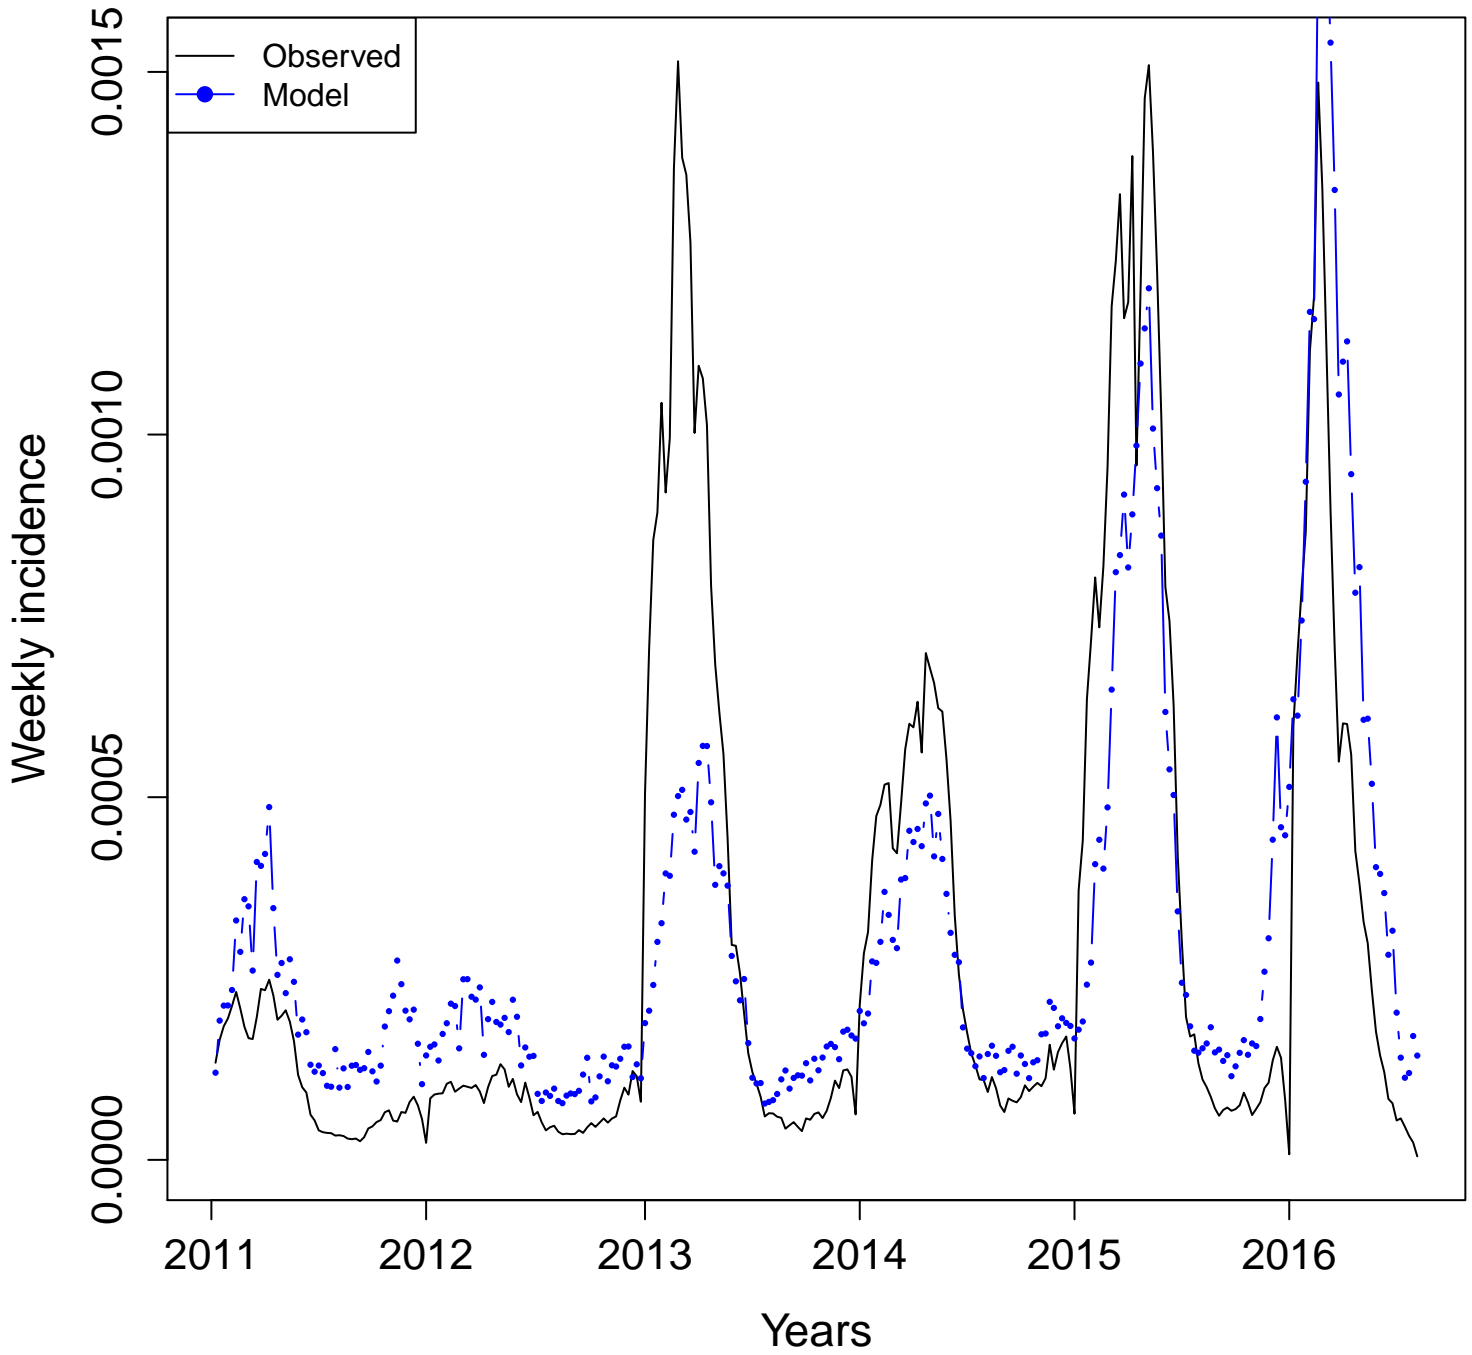

**GO- dengue.sintomas**  
**Adj. R squared = 0.6523**

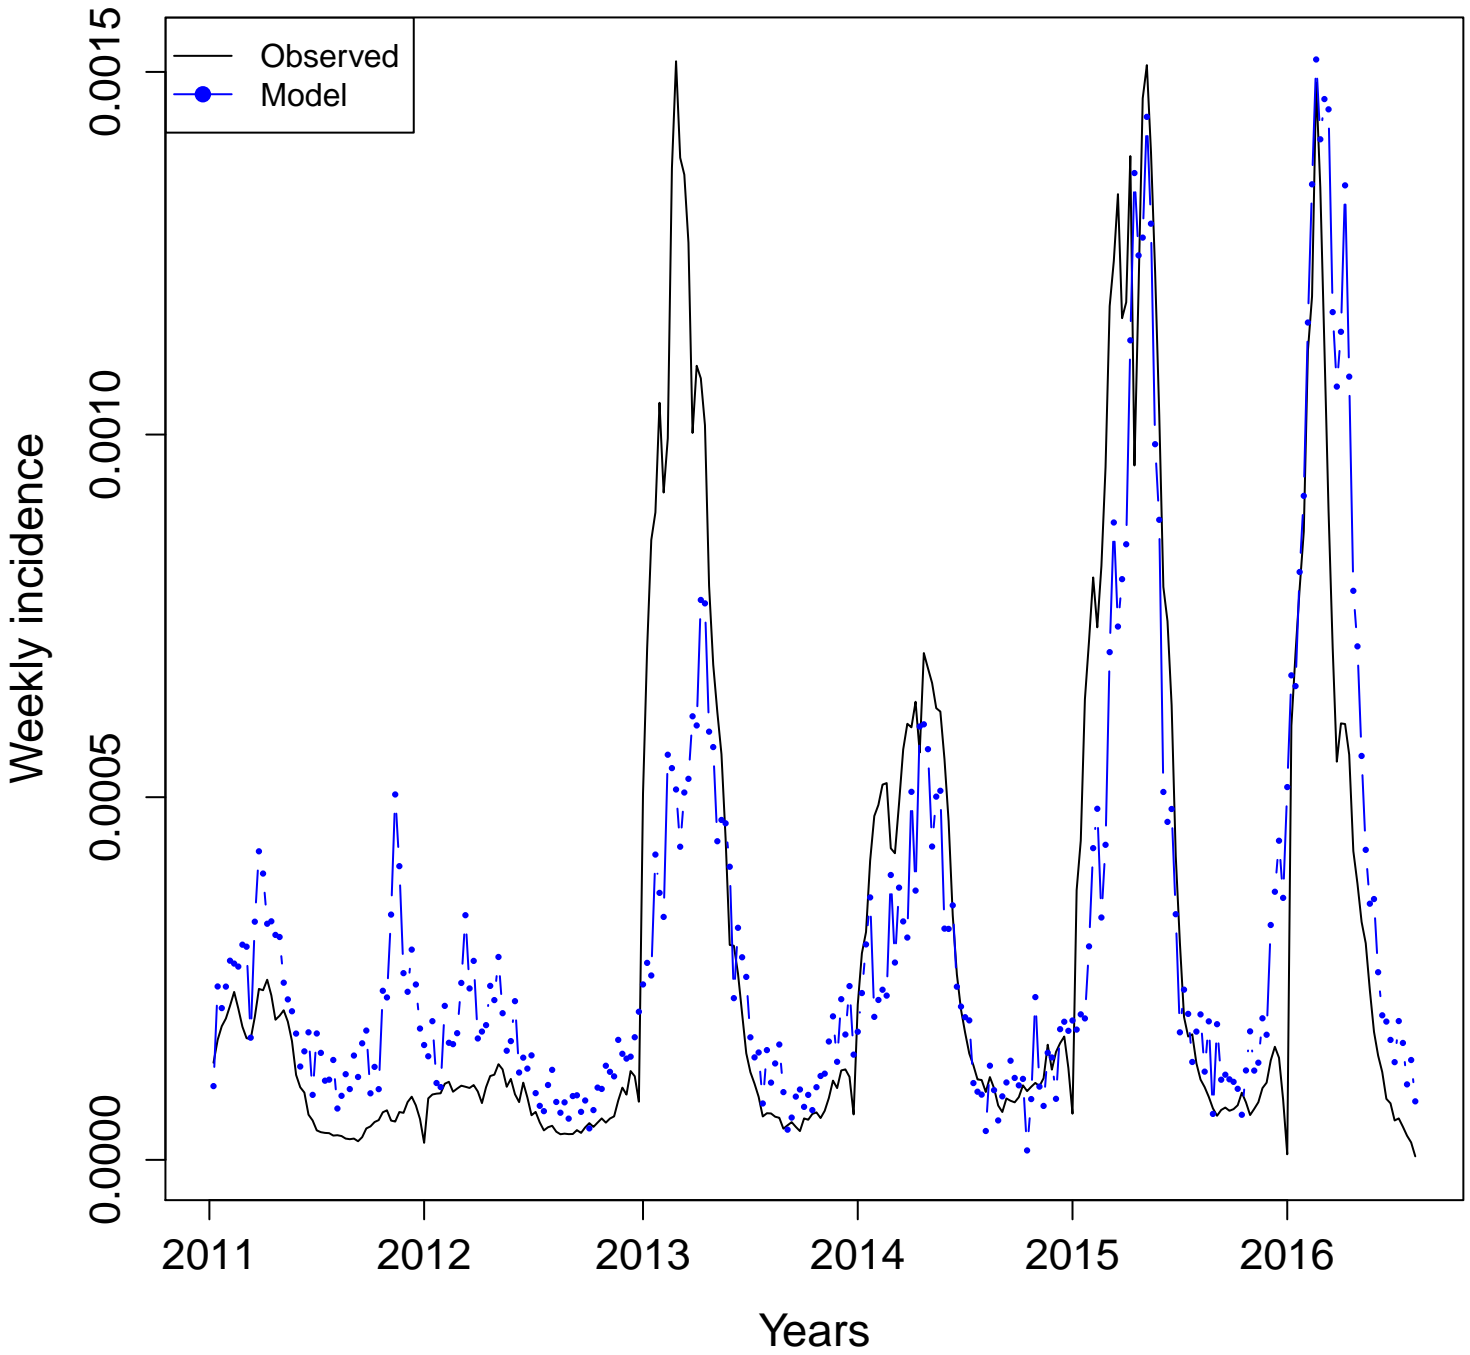

**GO- dengue.virus**  
**Adj. R squared = 0.197**

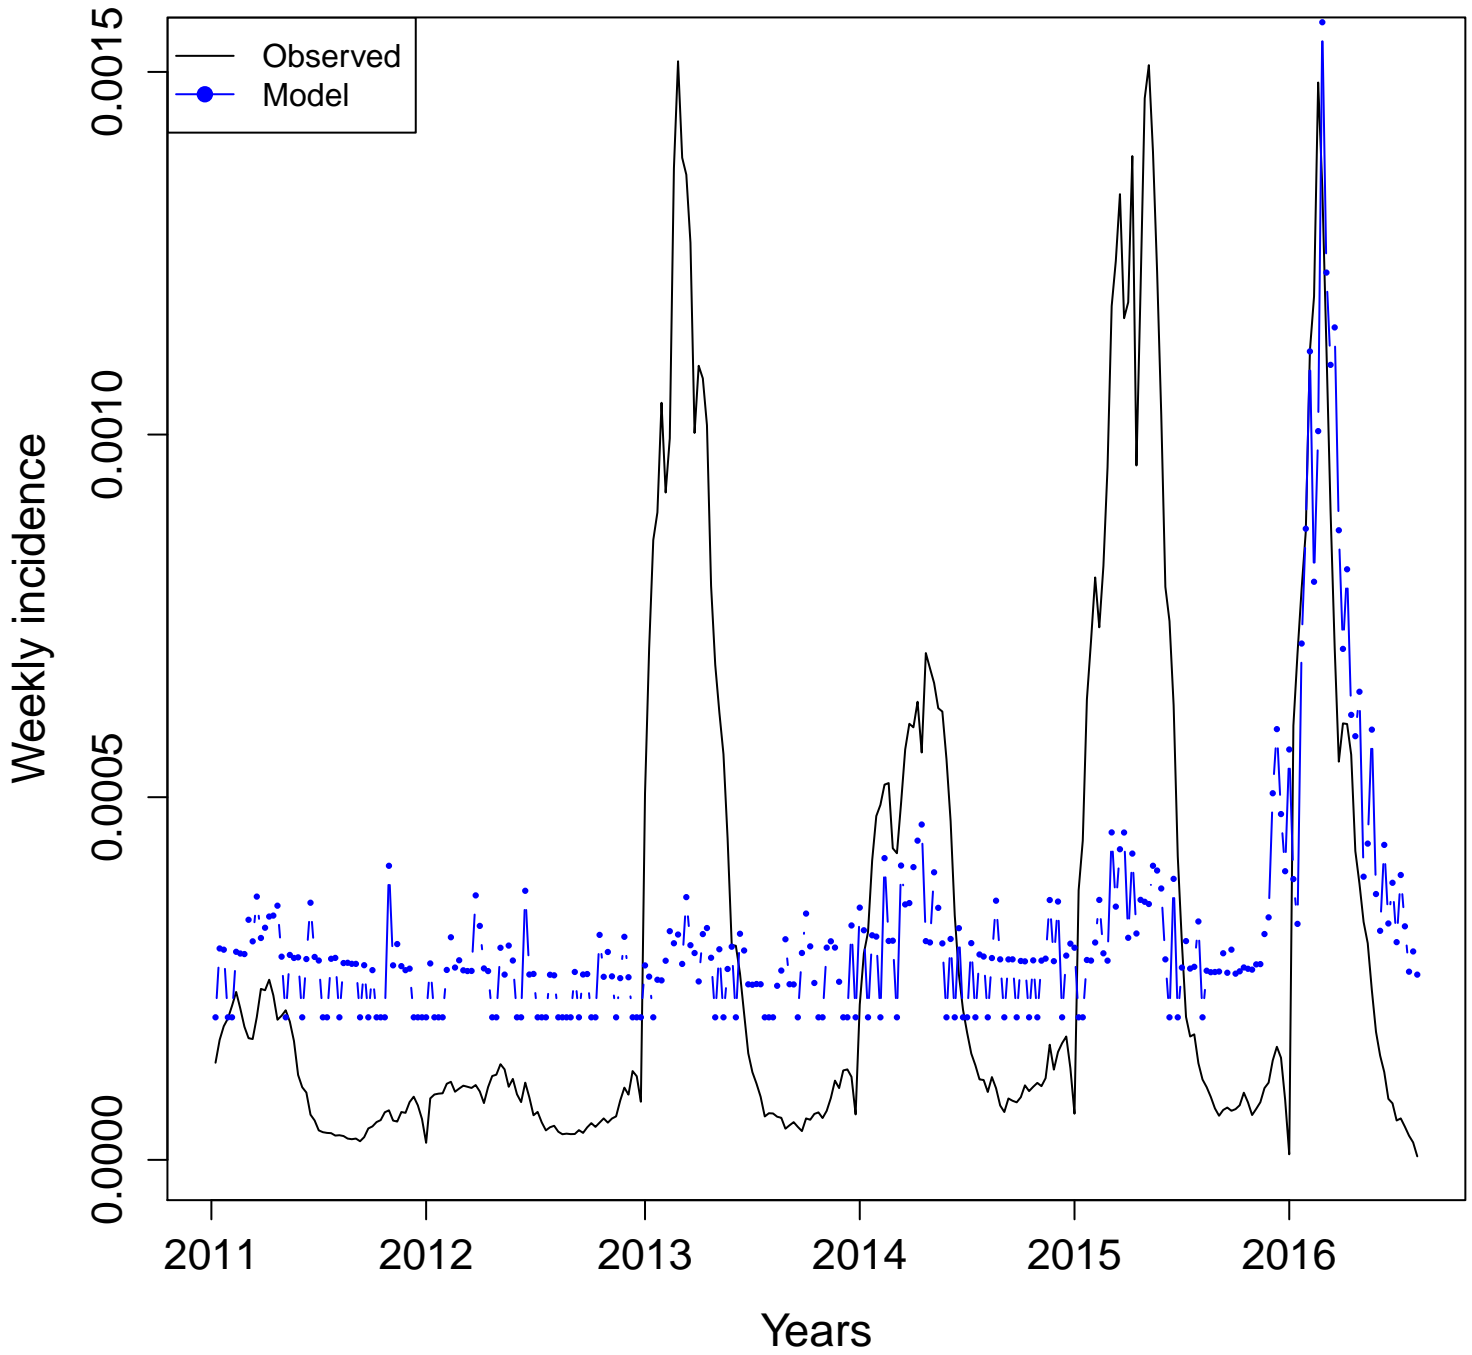



**GO- DHF**  
**Adj. R squared = 5e-04**

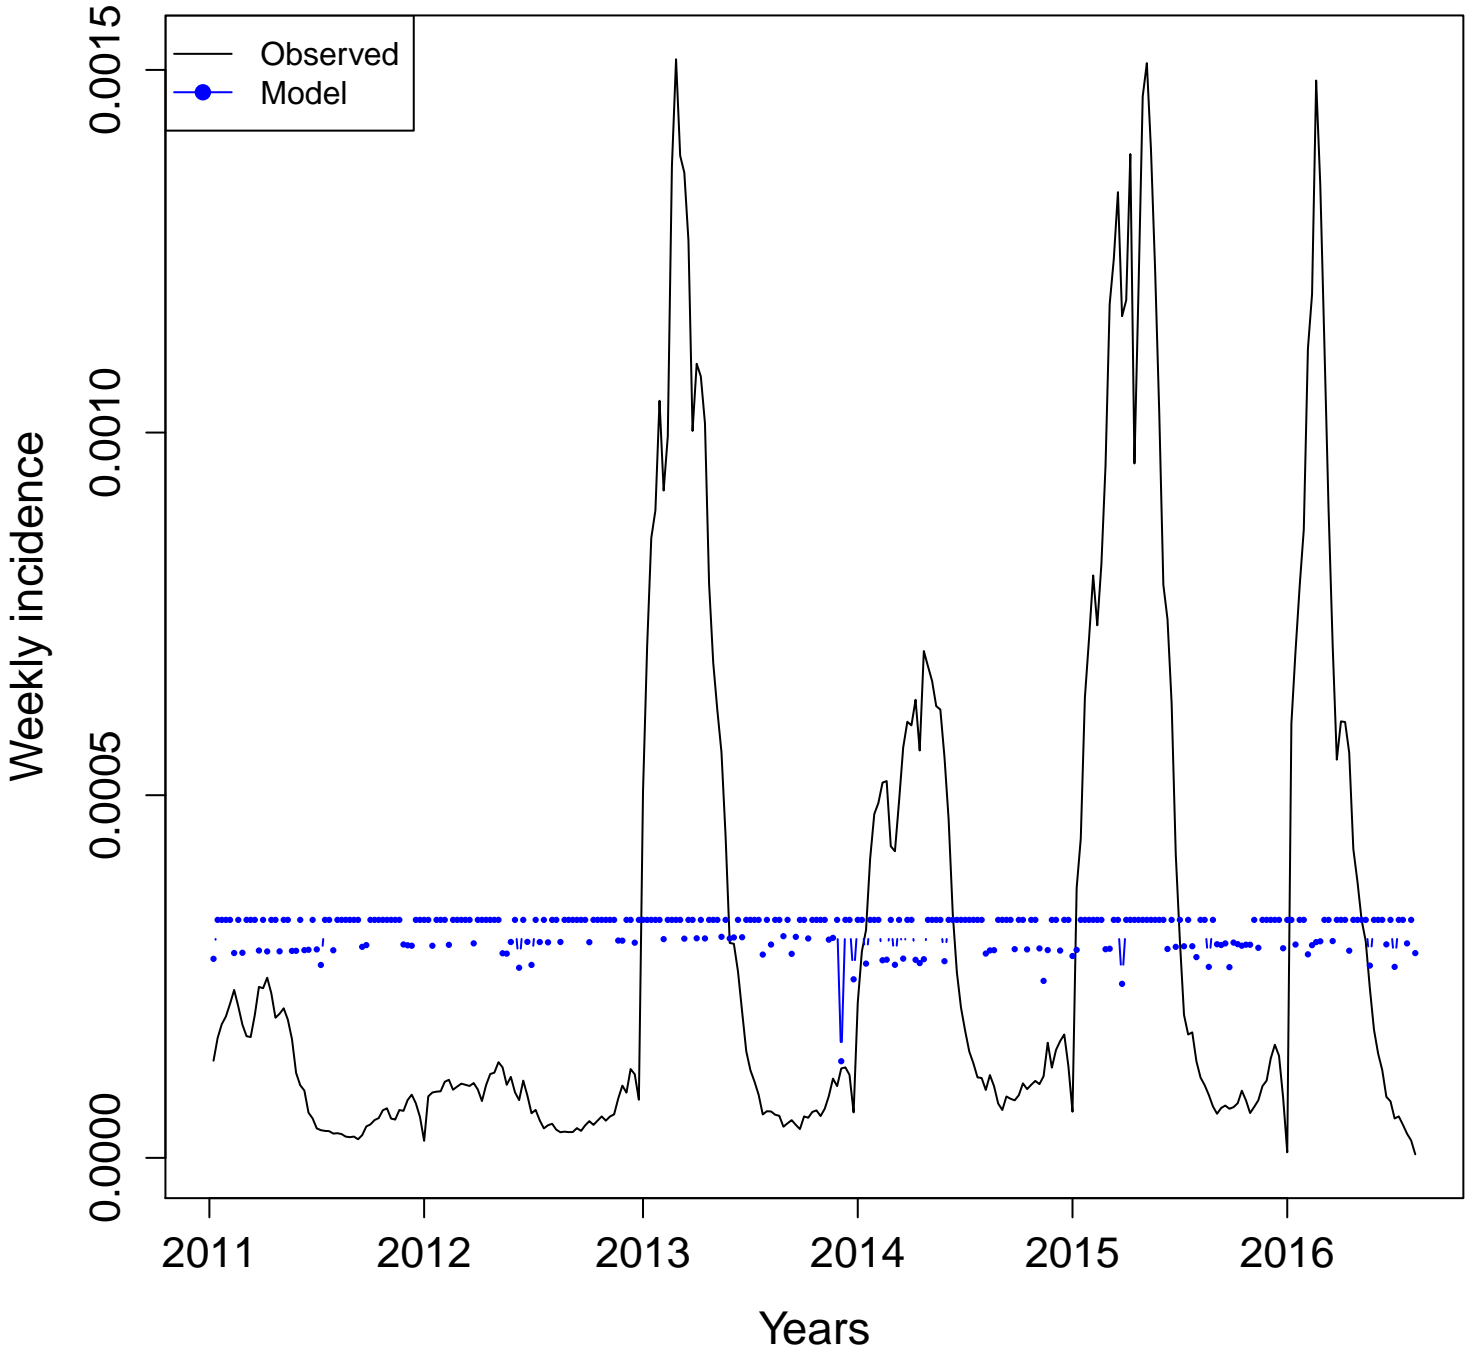

**GO- mosquito.dengue**  
**Adj. R squared = 0.3398**

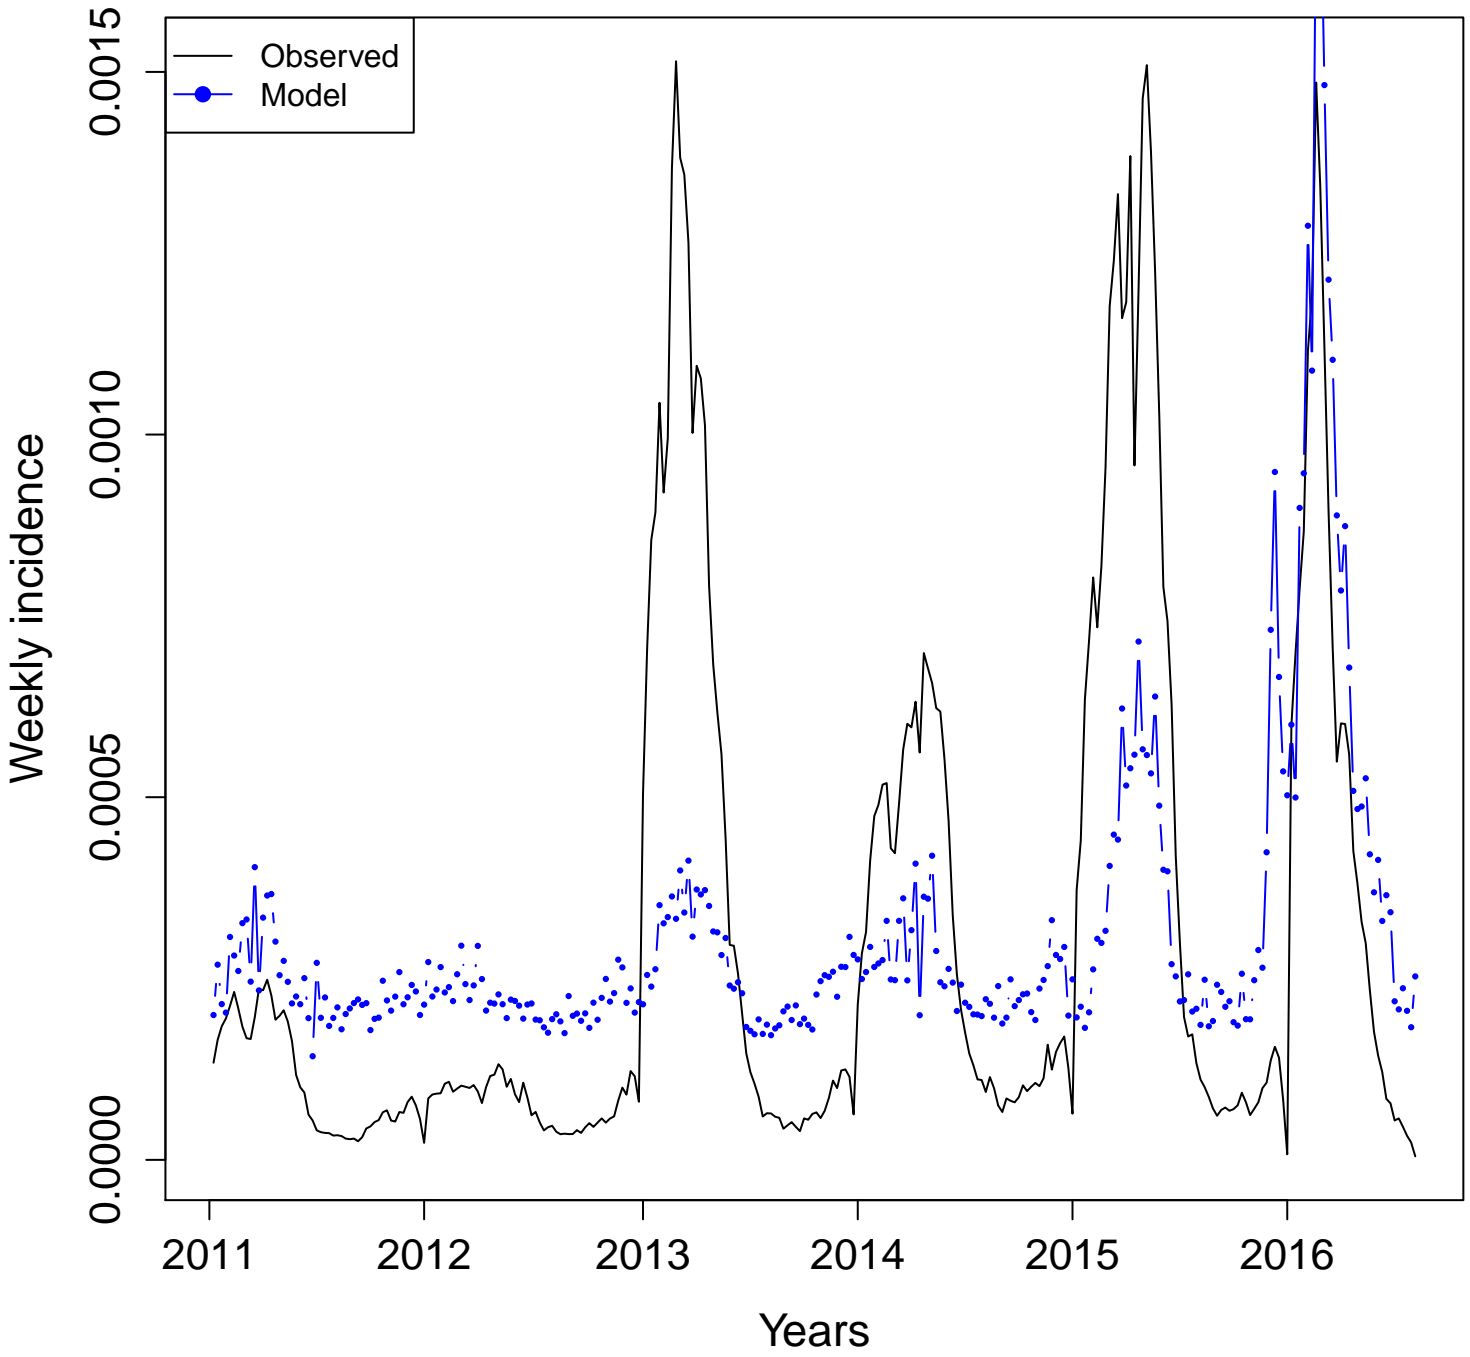

# GO- mosquito

Adj. R squared = 0.2733

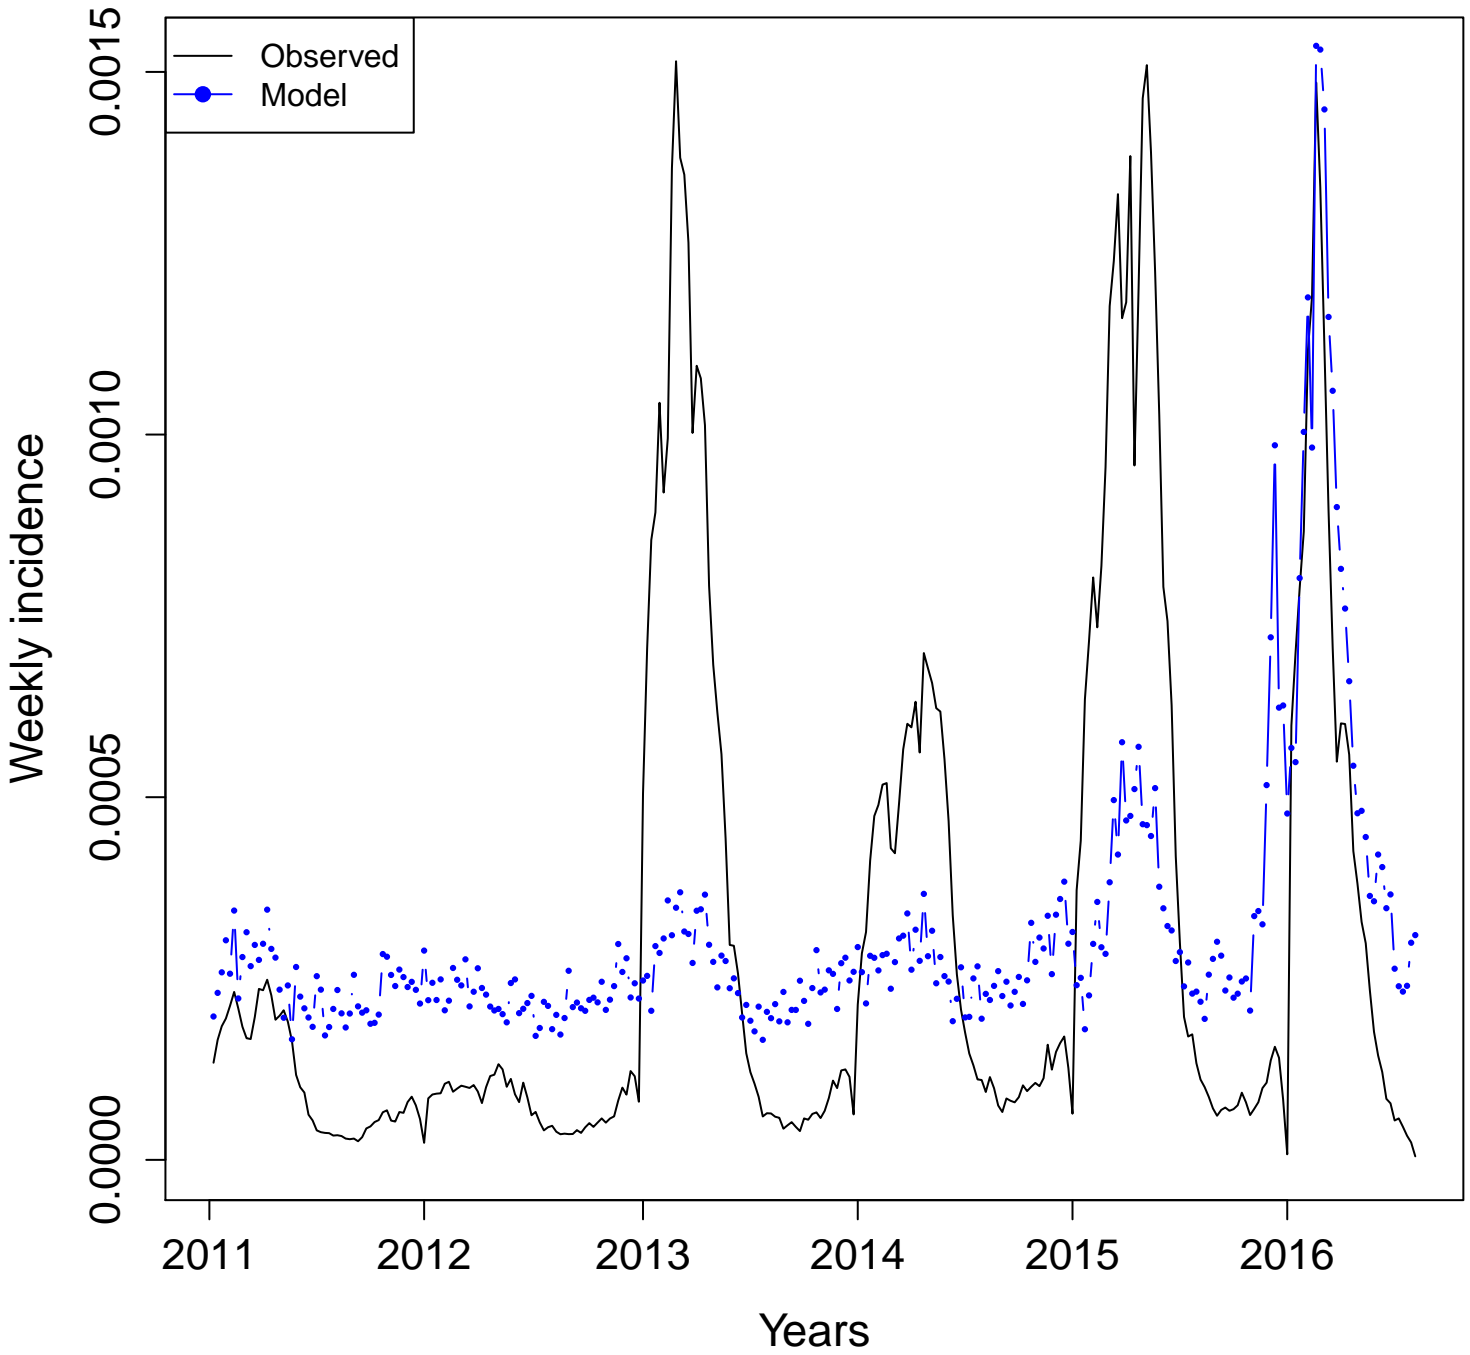

**GO- sintomas.da.dengue**  
**Adj. R squared = 0.6403**

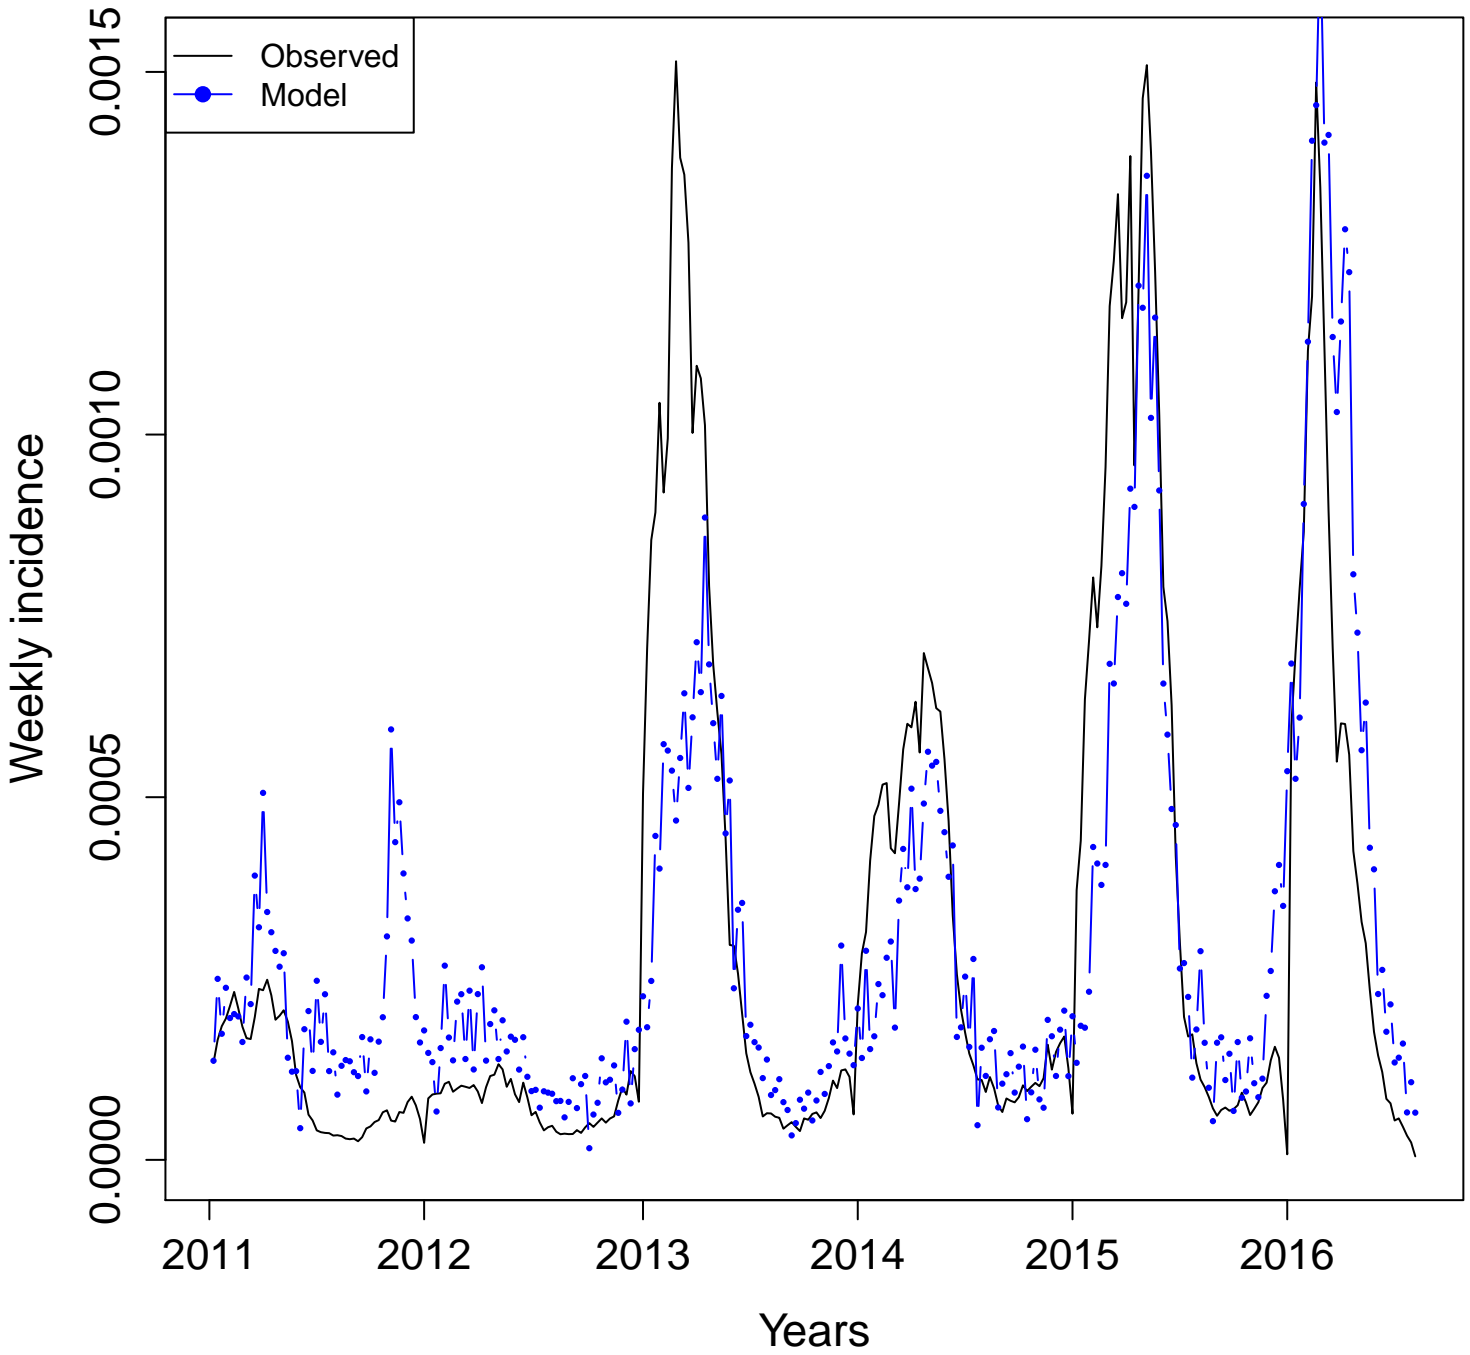

## Maranhão (MA)

# Dengue incidence vs. Google Health Trends (2011–2016)

### Definitions:

- **Combined terms:**
  - **All:** model with all the available terms.  $n =$  number of terms
  - **Four:** model with "dengue", "dengue sintomas", "aedes", and "mosquito".
  - **Uncorrelated:** model with non-correlated terms.  $n =$  number of uncorrelated terms
- **Individual terms:** Plots developed with one term at a time.
- Terms for all and uncorrelated models can be found in additional file 3.

**Combined terms**  
**Adjusted R squared**

**Maranhão (MA)**

**All**  
**(n = 9)**

**BR-MA**  
**Adj. R squared = 0.8592**

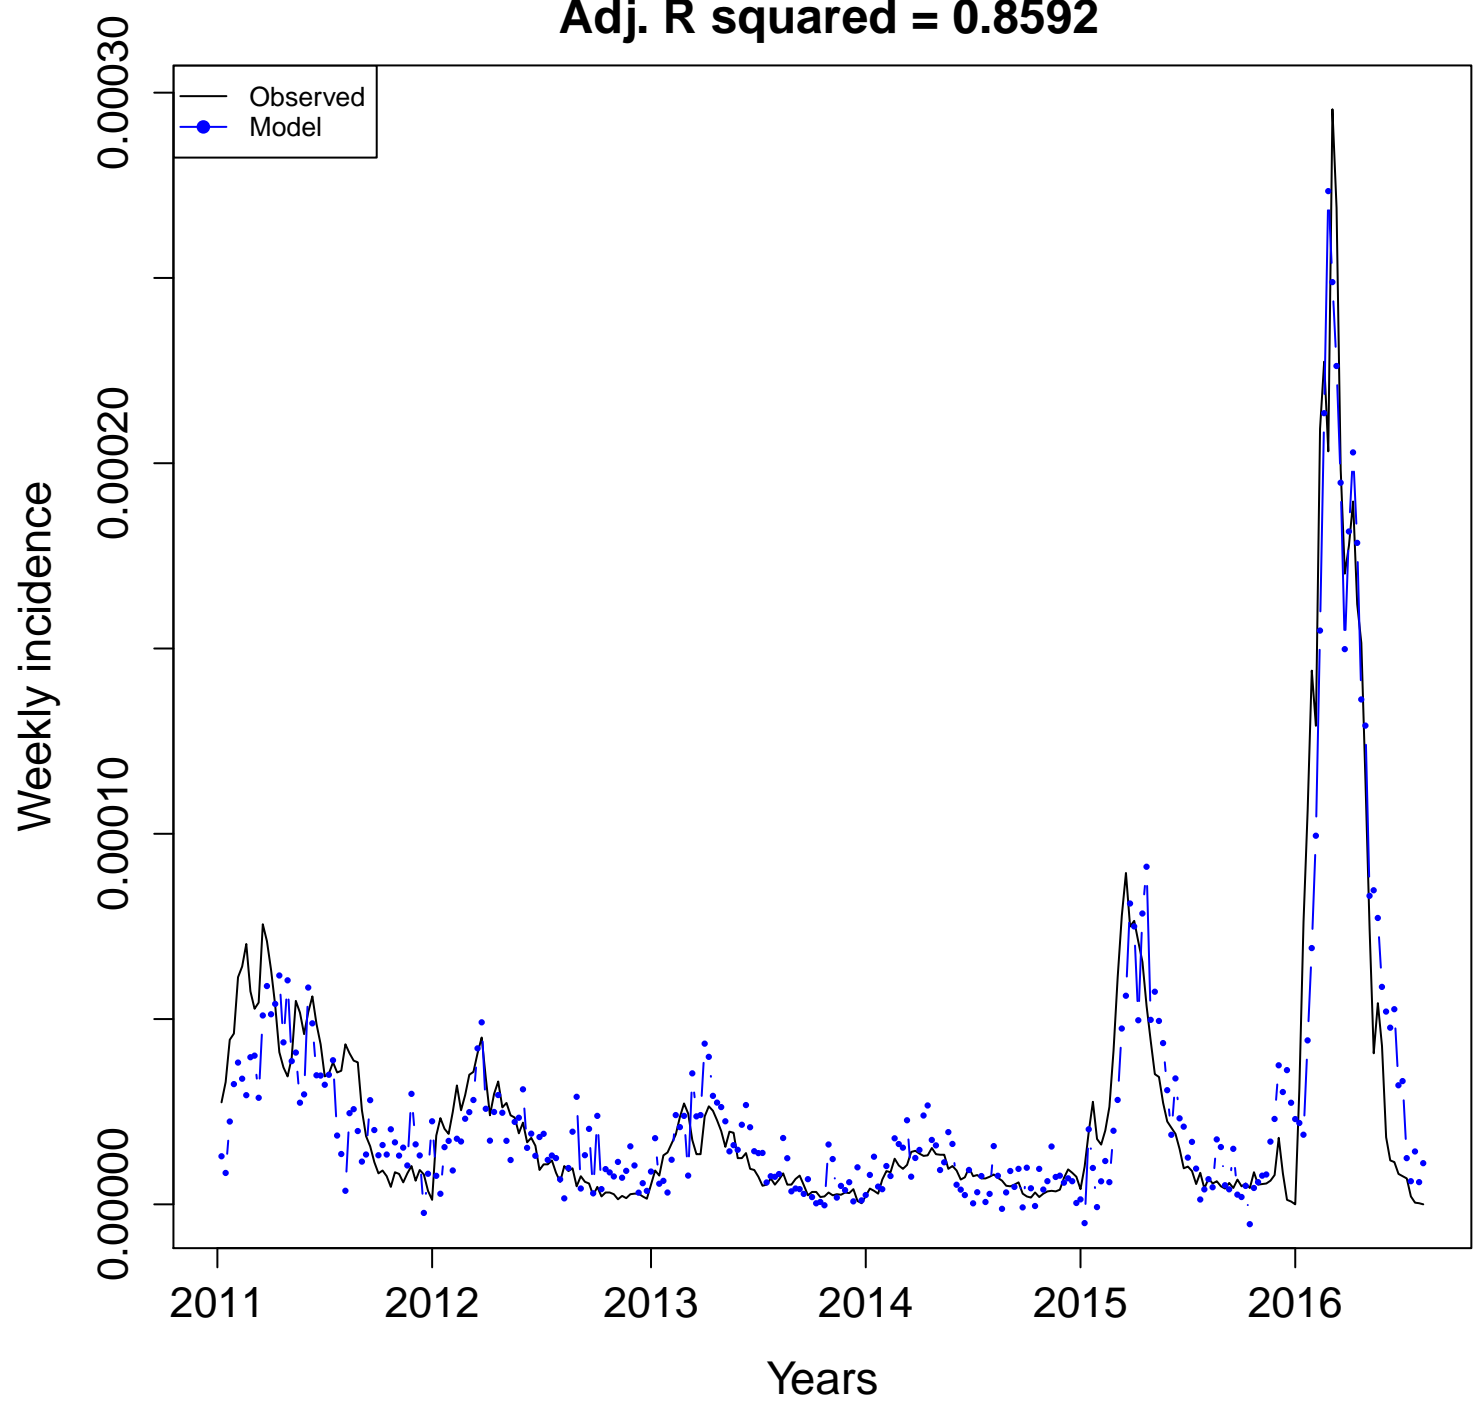

**BR-MA**  
**Adj. R squared = 0.8564**

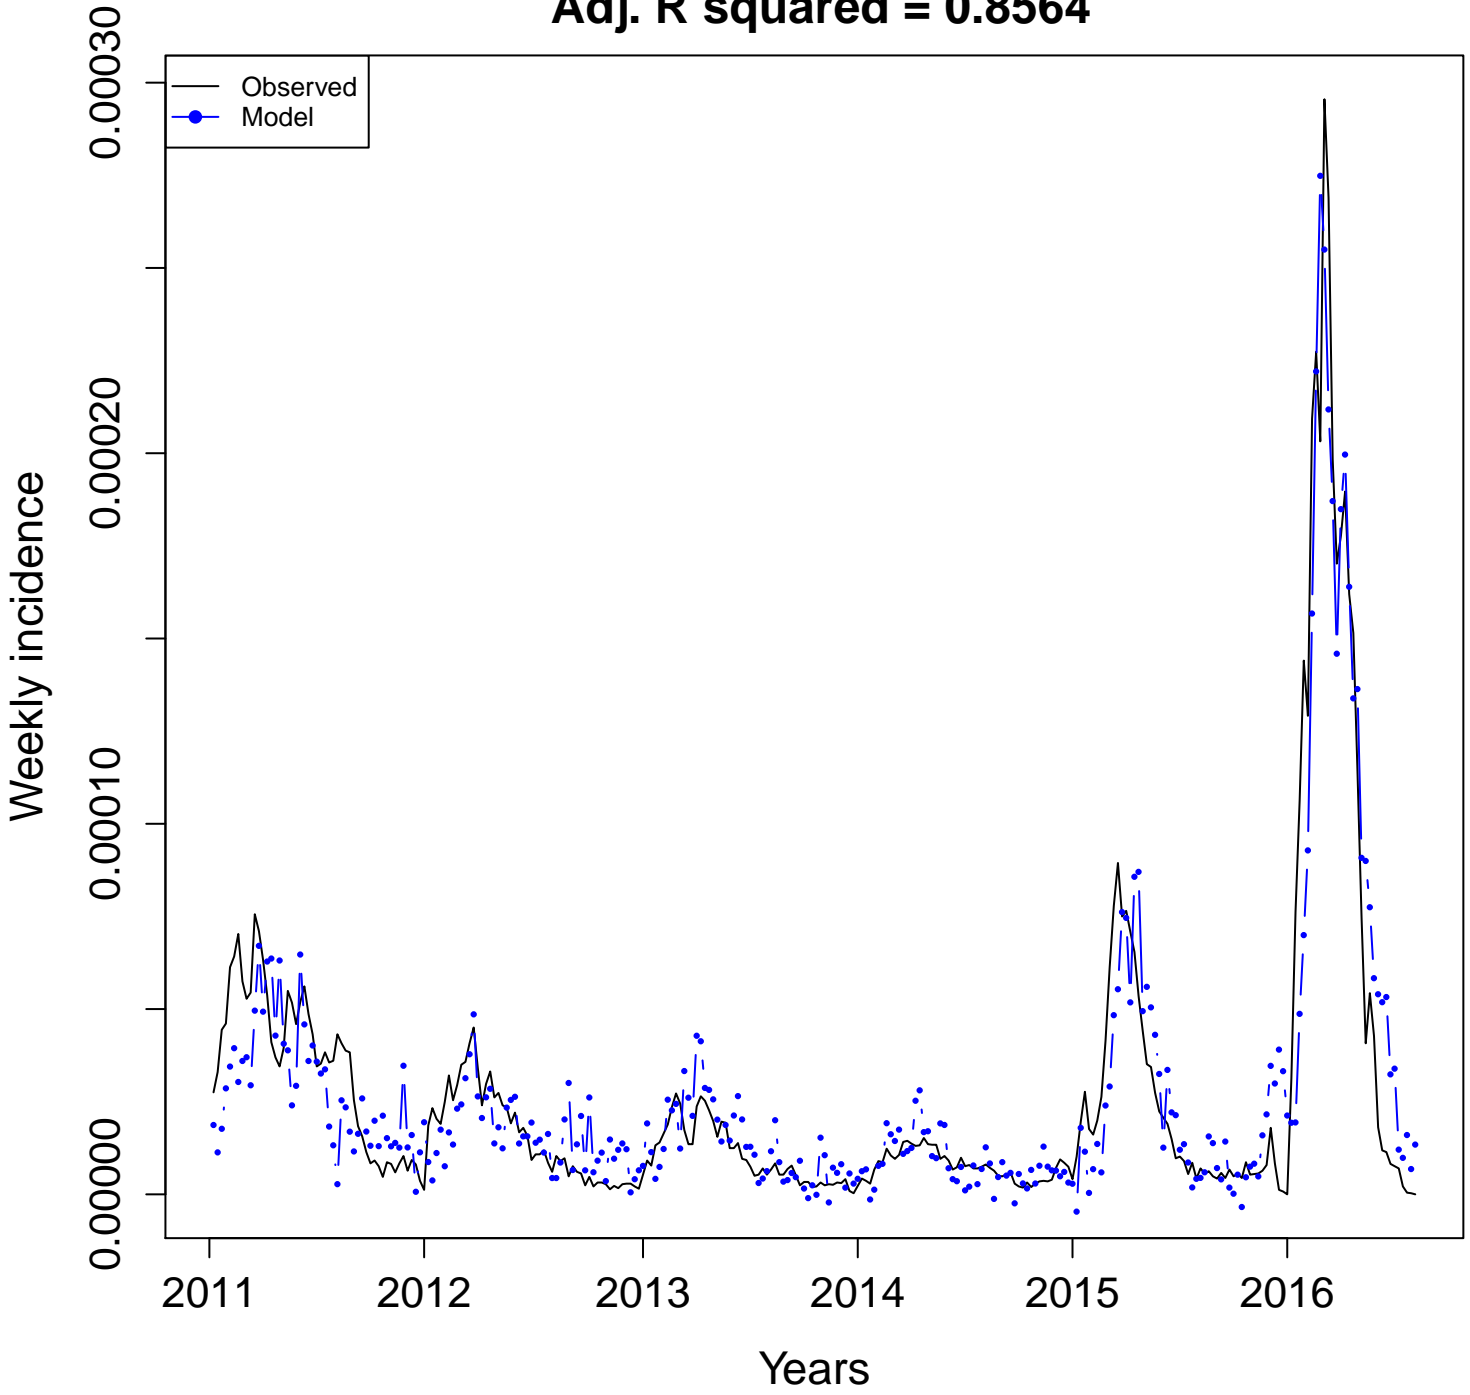



**Uncorrelated  
(n = 2)**

**BR-MA  
Adj. R squared = 0.6155**

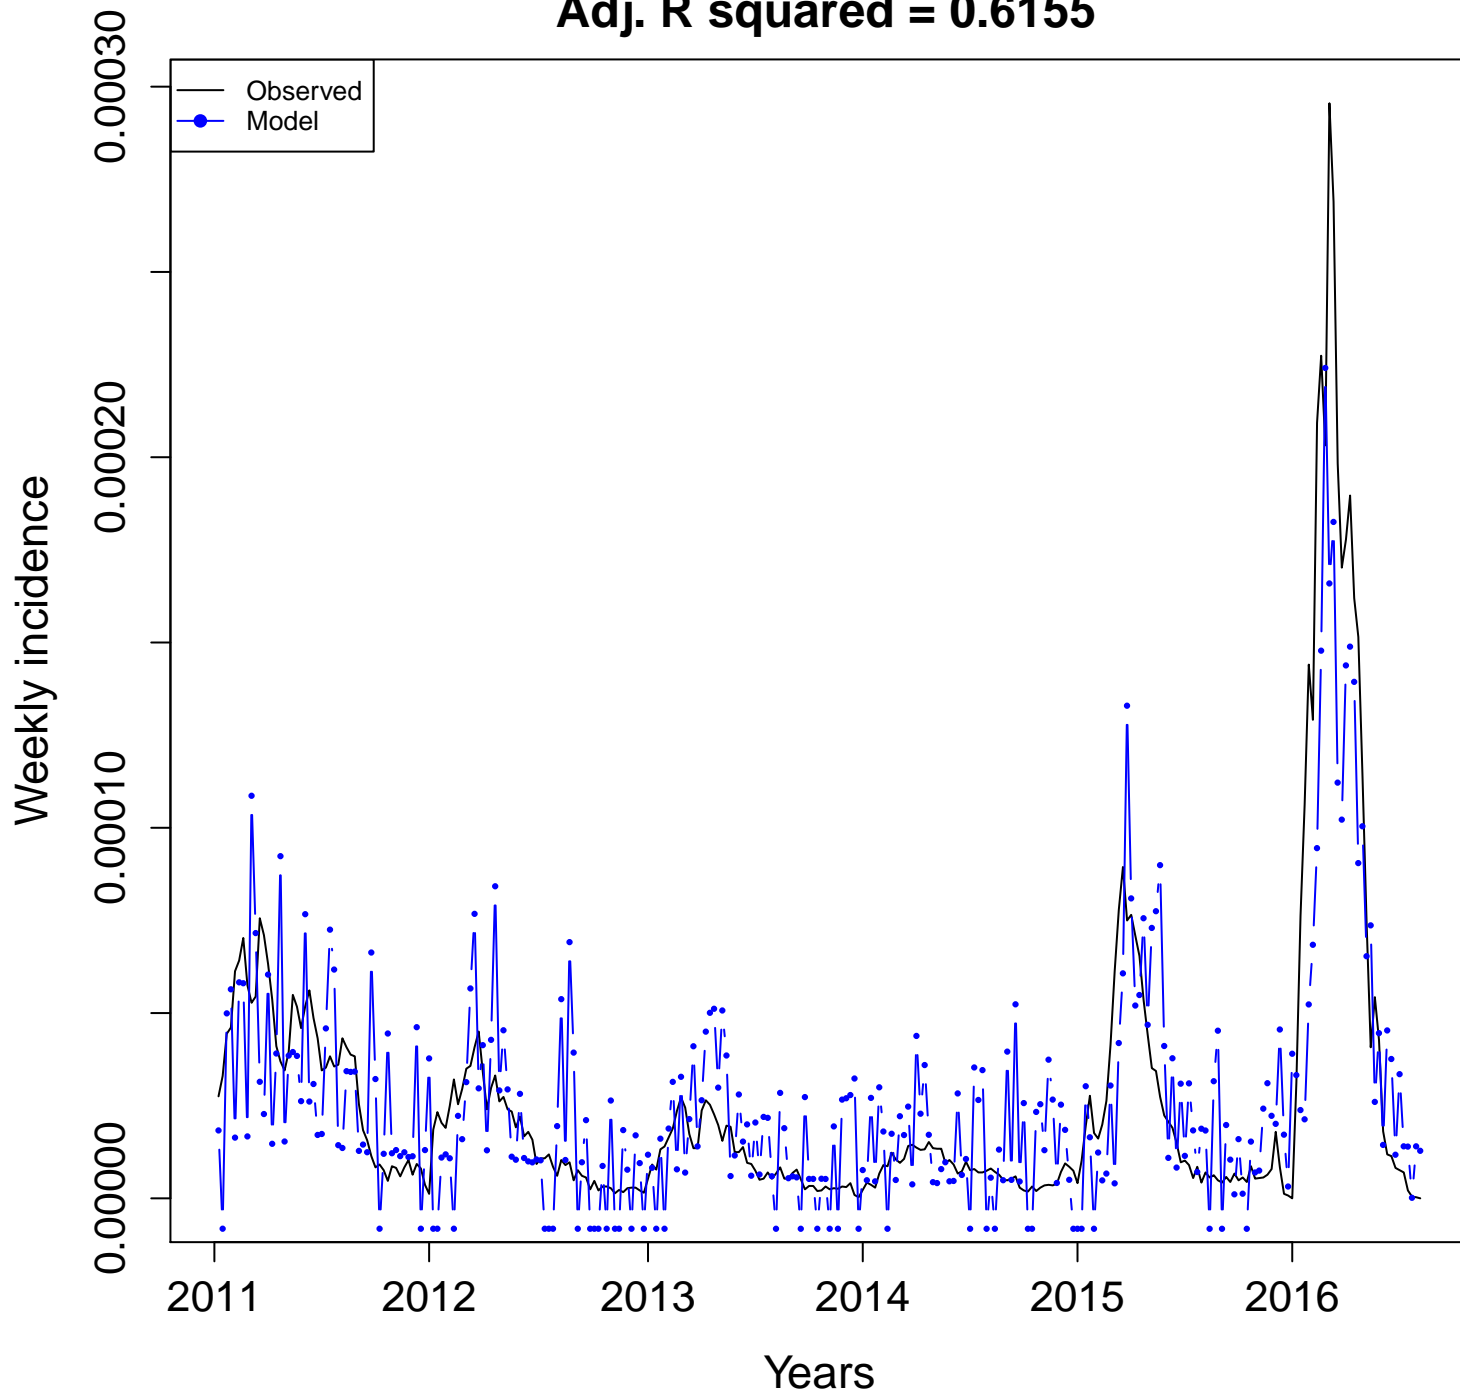

**Individual terms**  
**Adjusted R squared**

**Maranhão (MA)**

**MA- aedes.aegypti**  
**Adj. R squared = 0.7025**

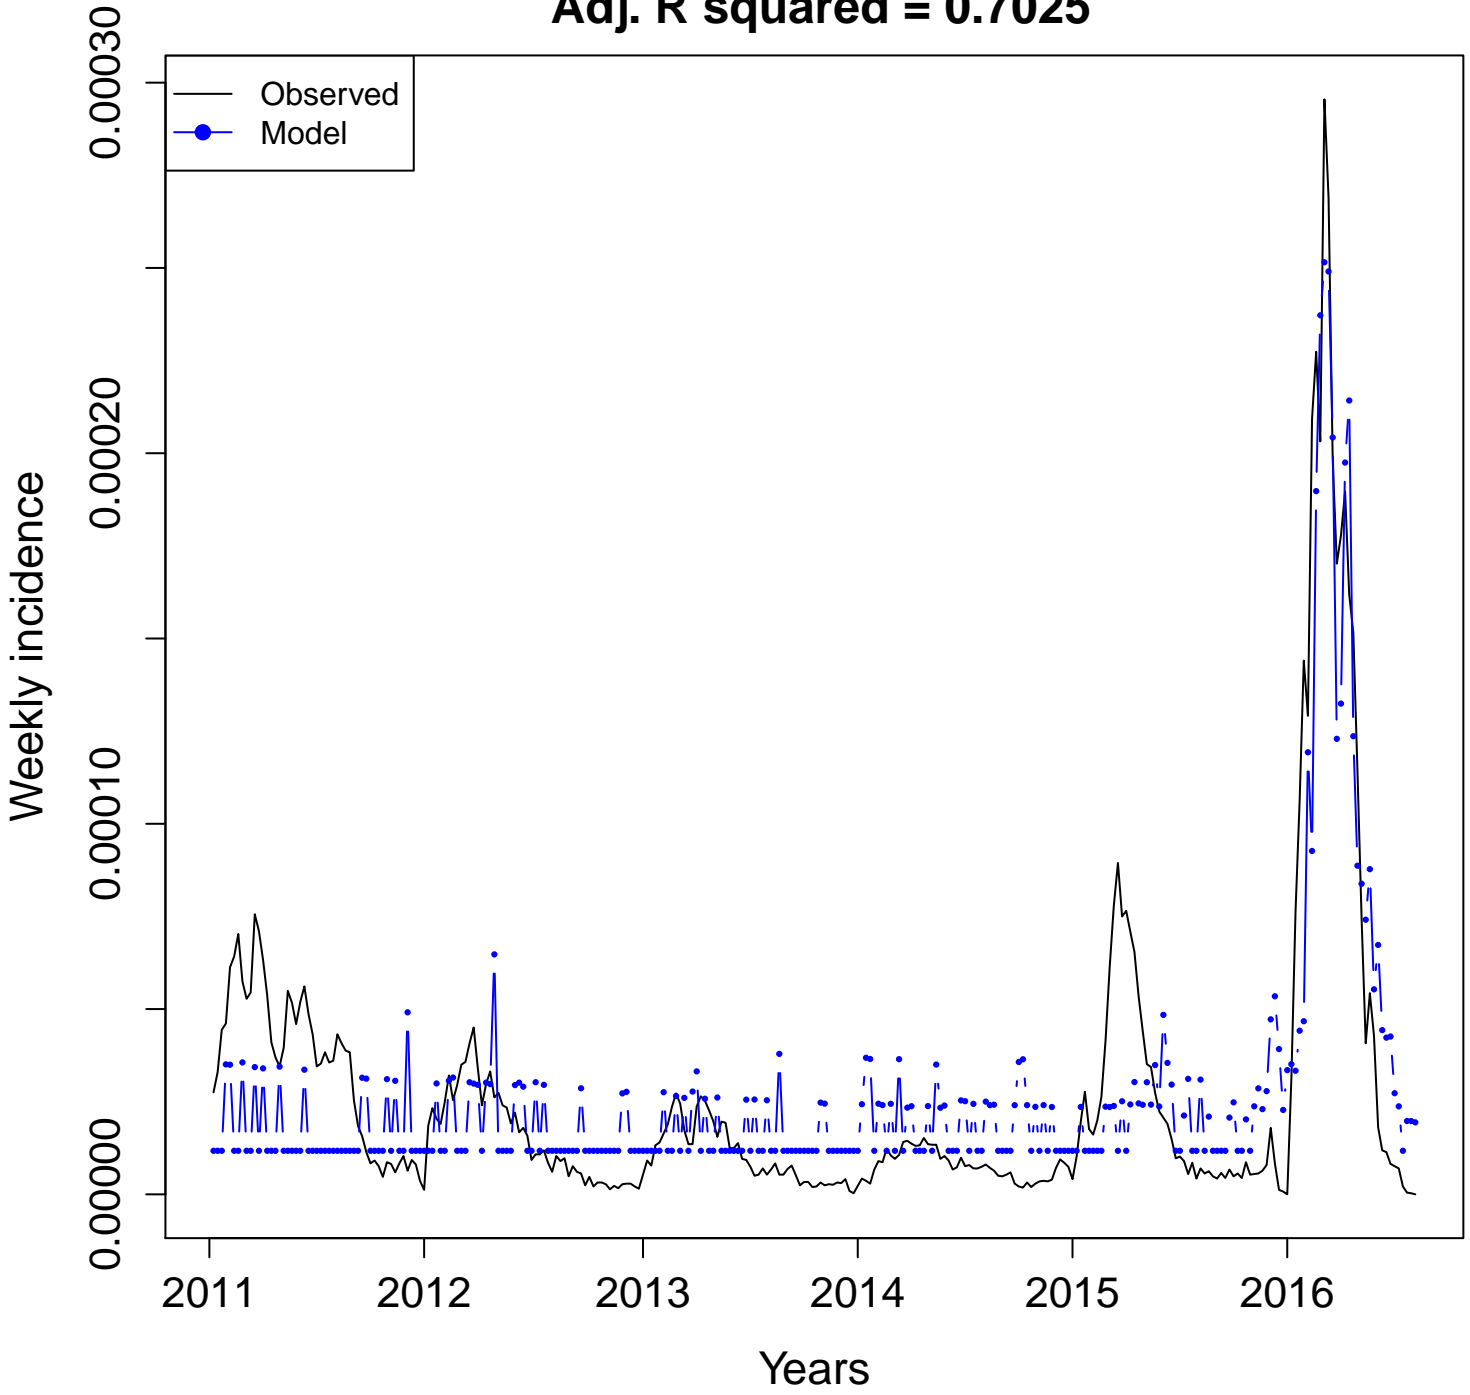

**MA- aedes**  
**Adj. R squared = 0.7026**

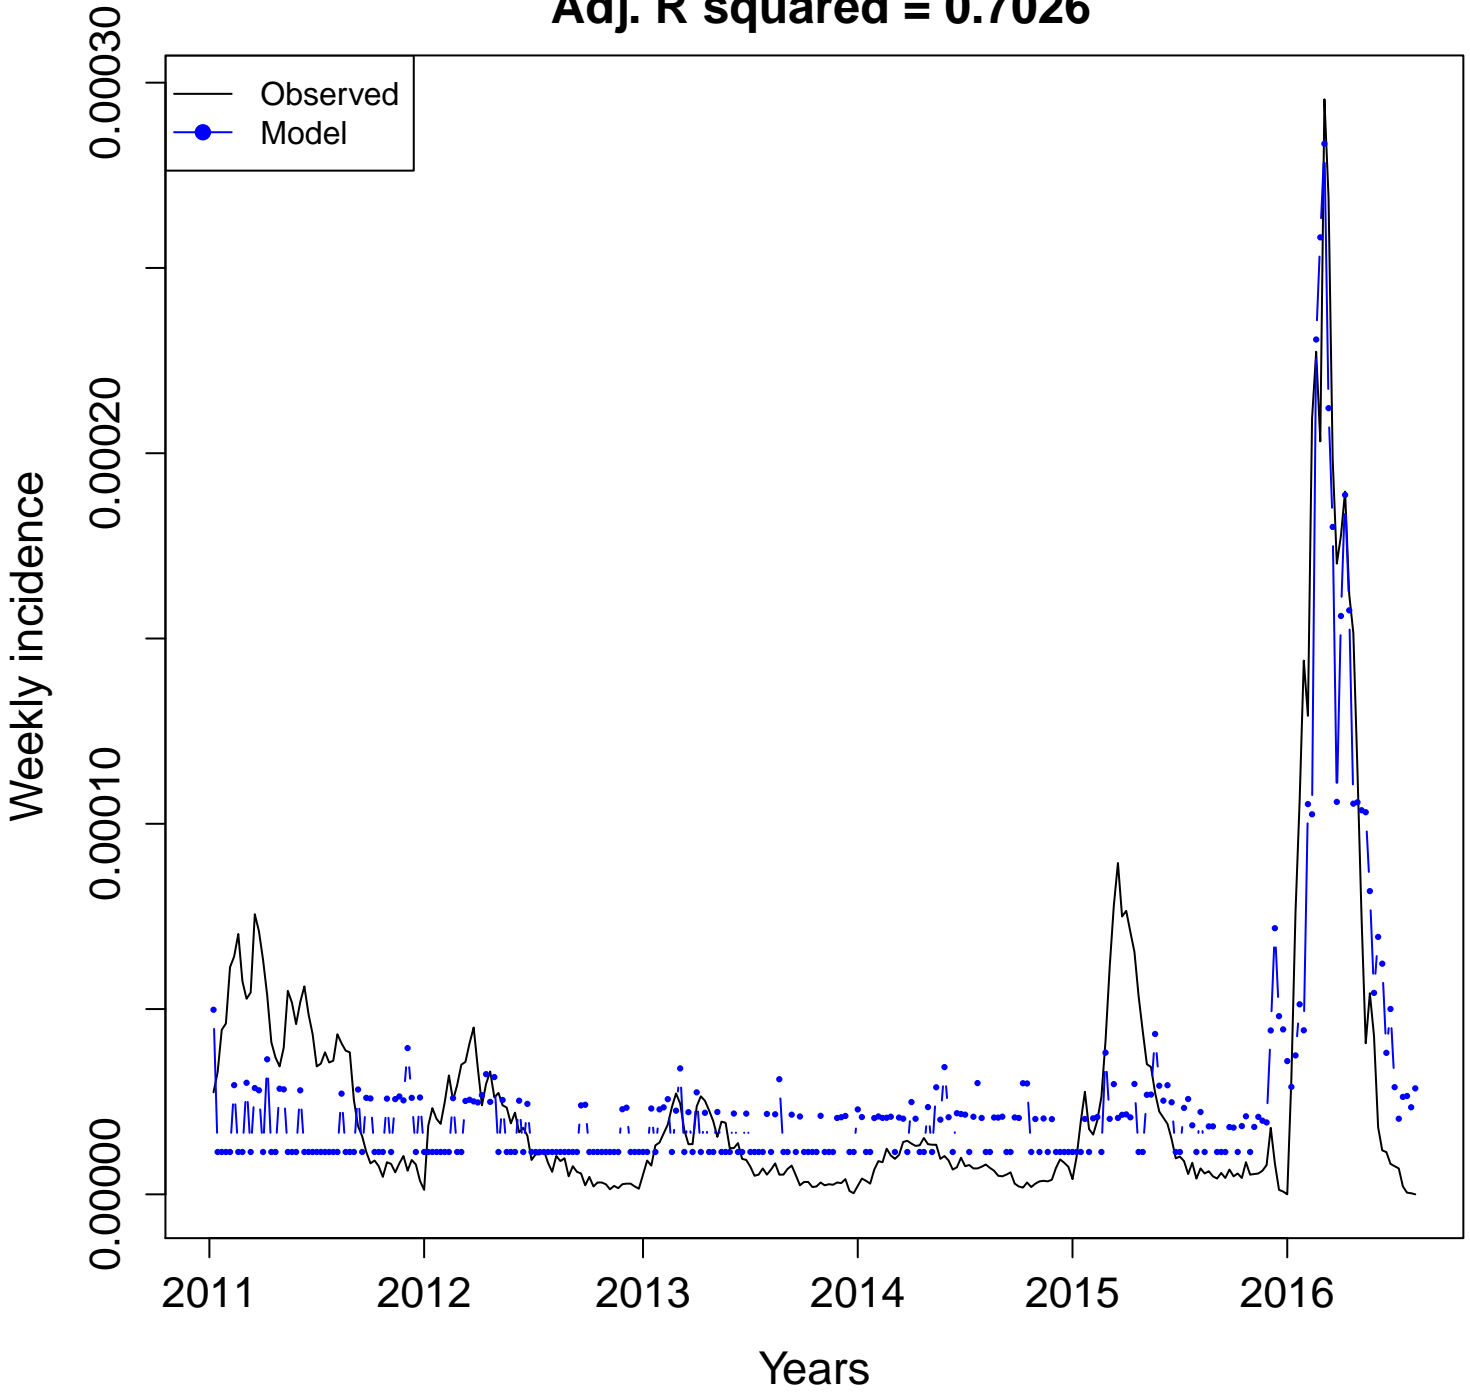

**MA- aegypti**  
**Adj. R squared = 0.7052**

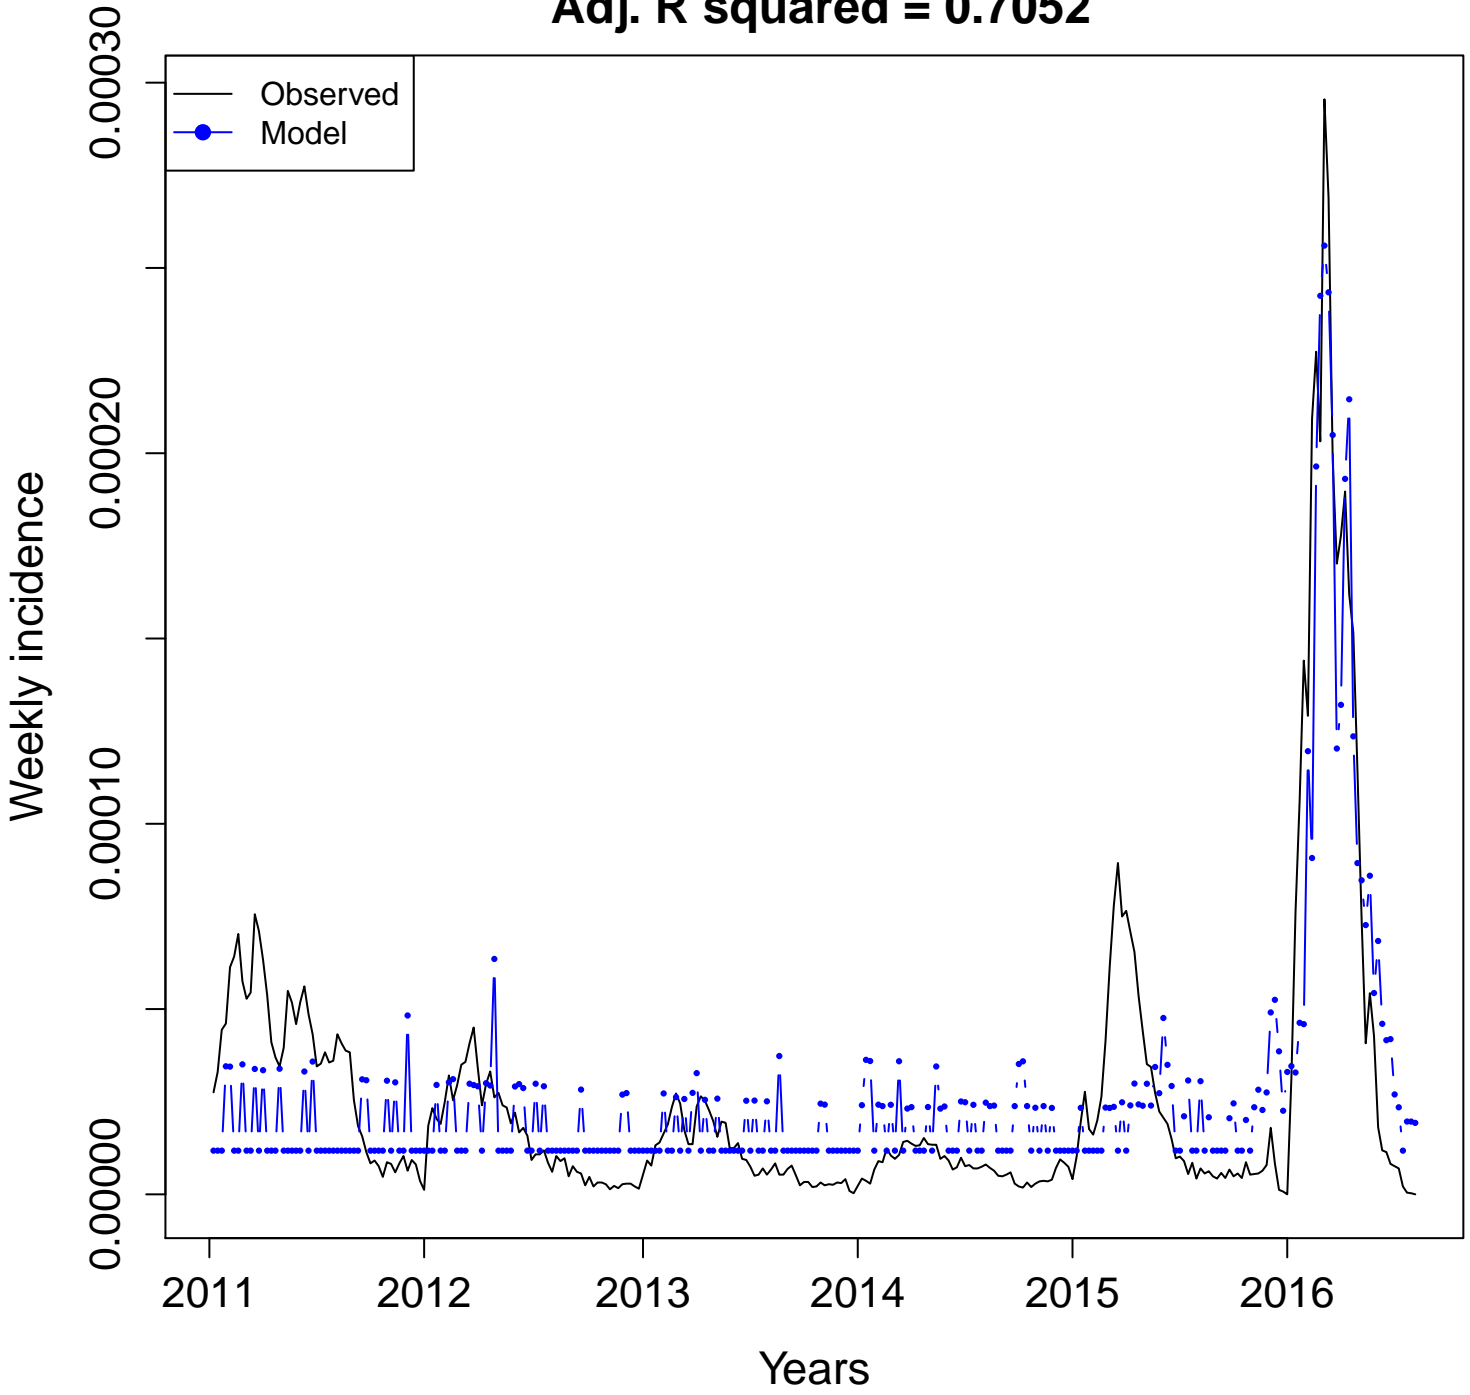

**MA- dengue**  
**Adj. R squared = 0.8314**

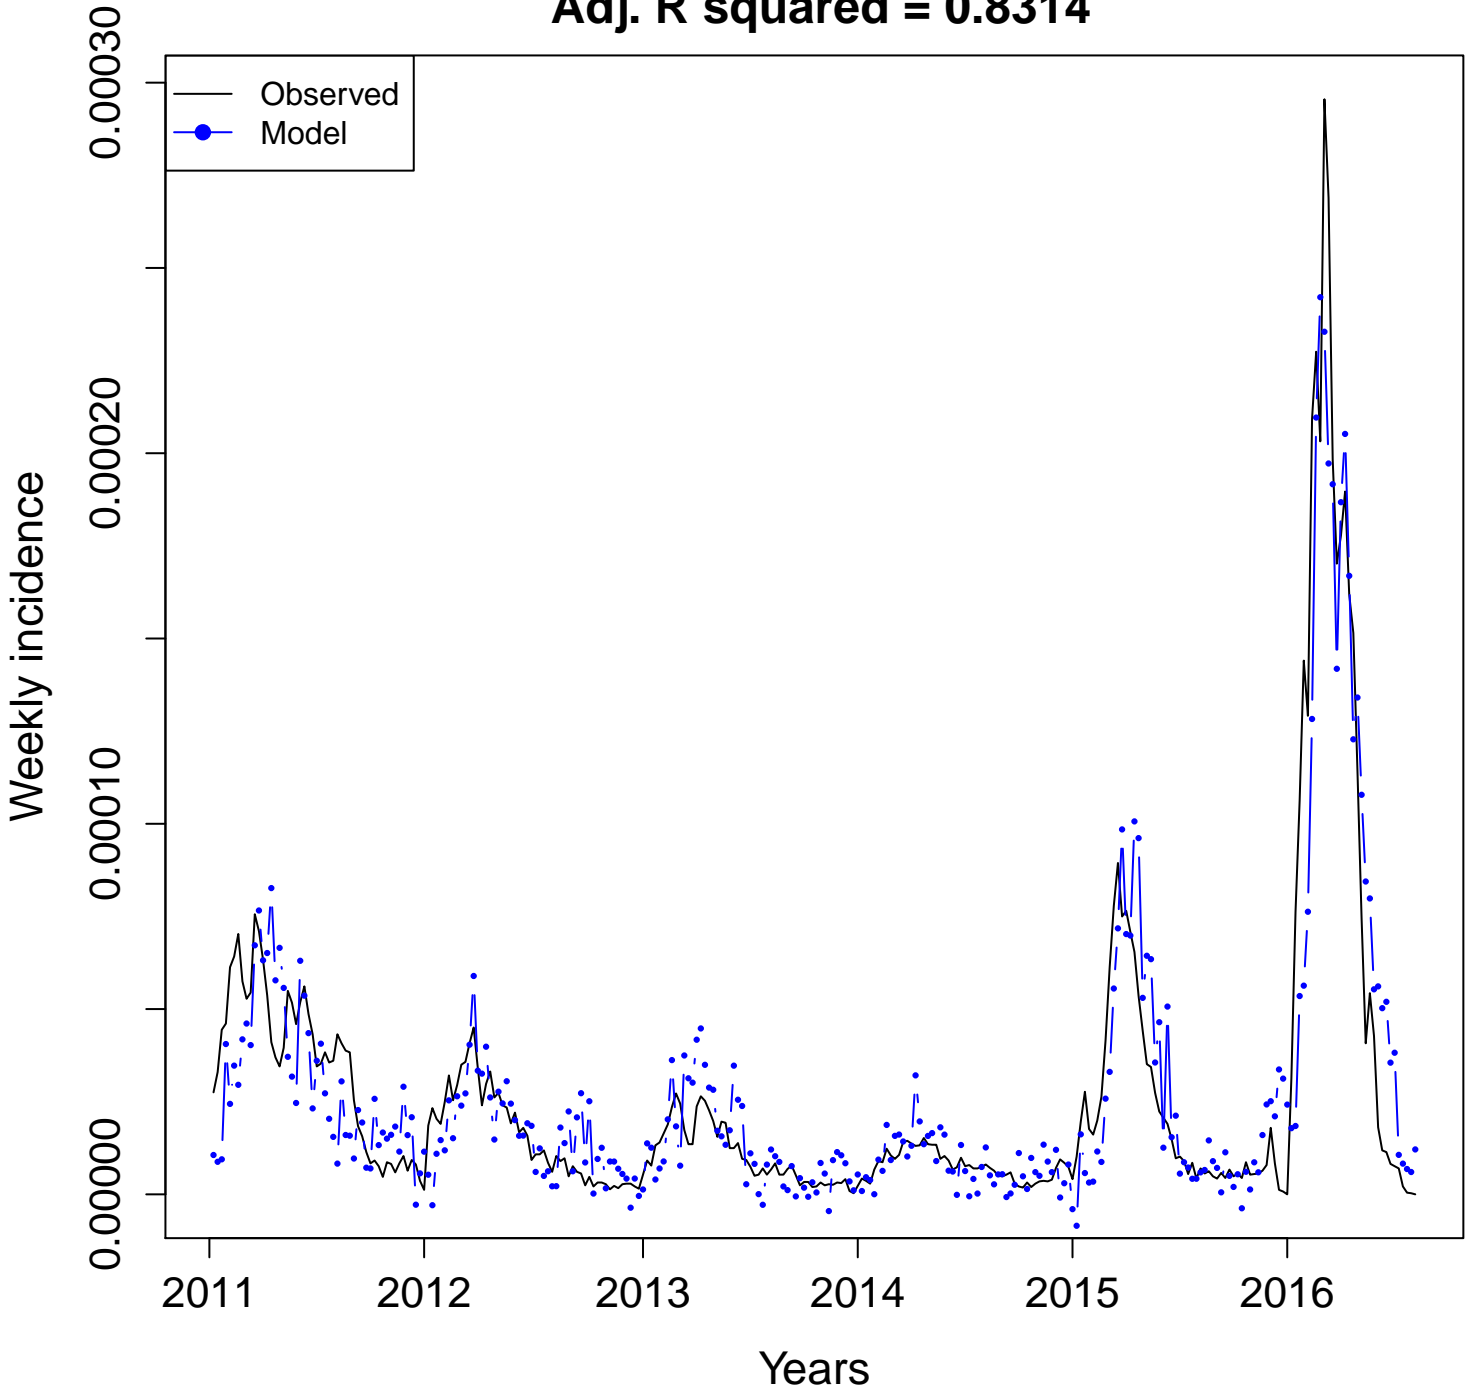

**MA- dengue.sintomas**  
**Adj. R squared = 0.4964**

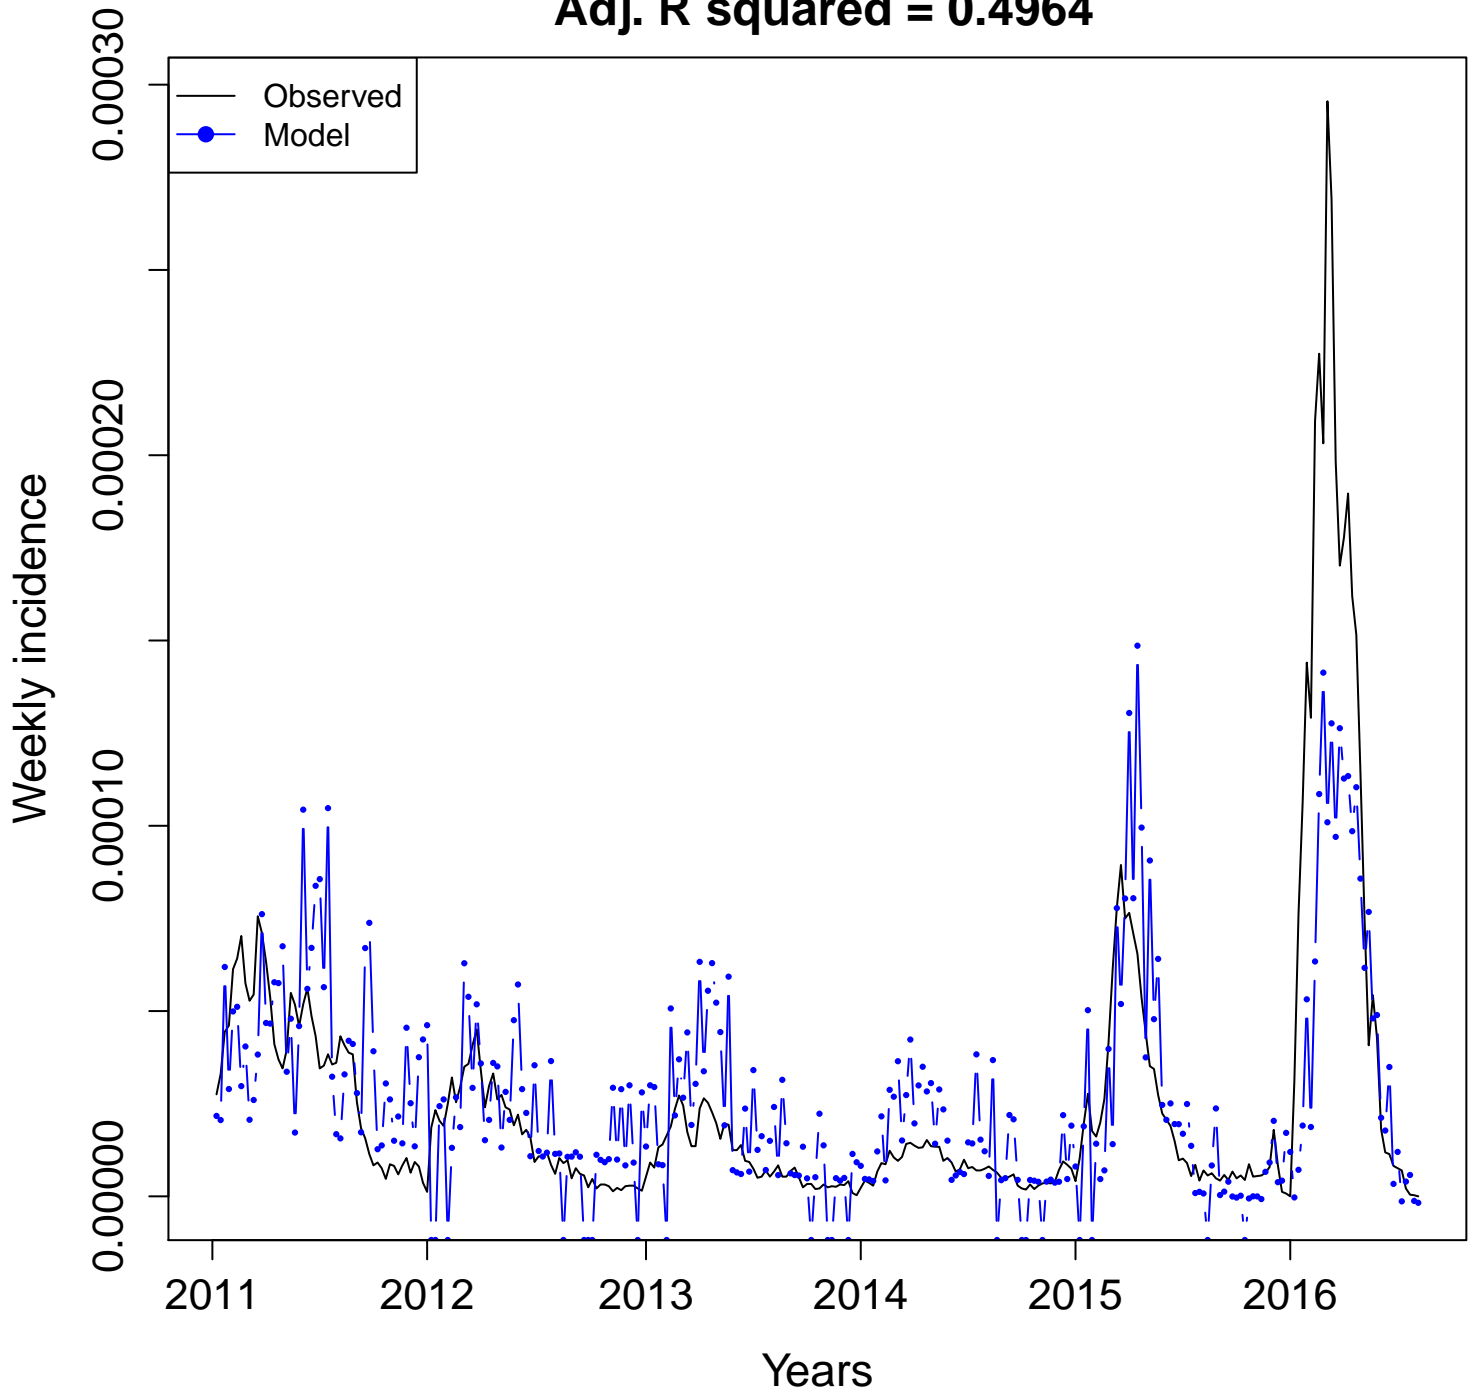

**MA- dengue.virus**  
**Adj. R squared = 0.4616**

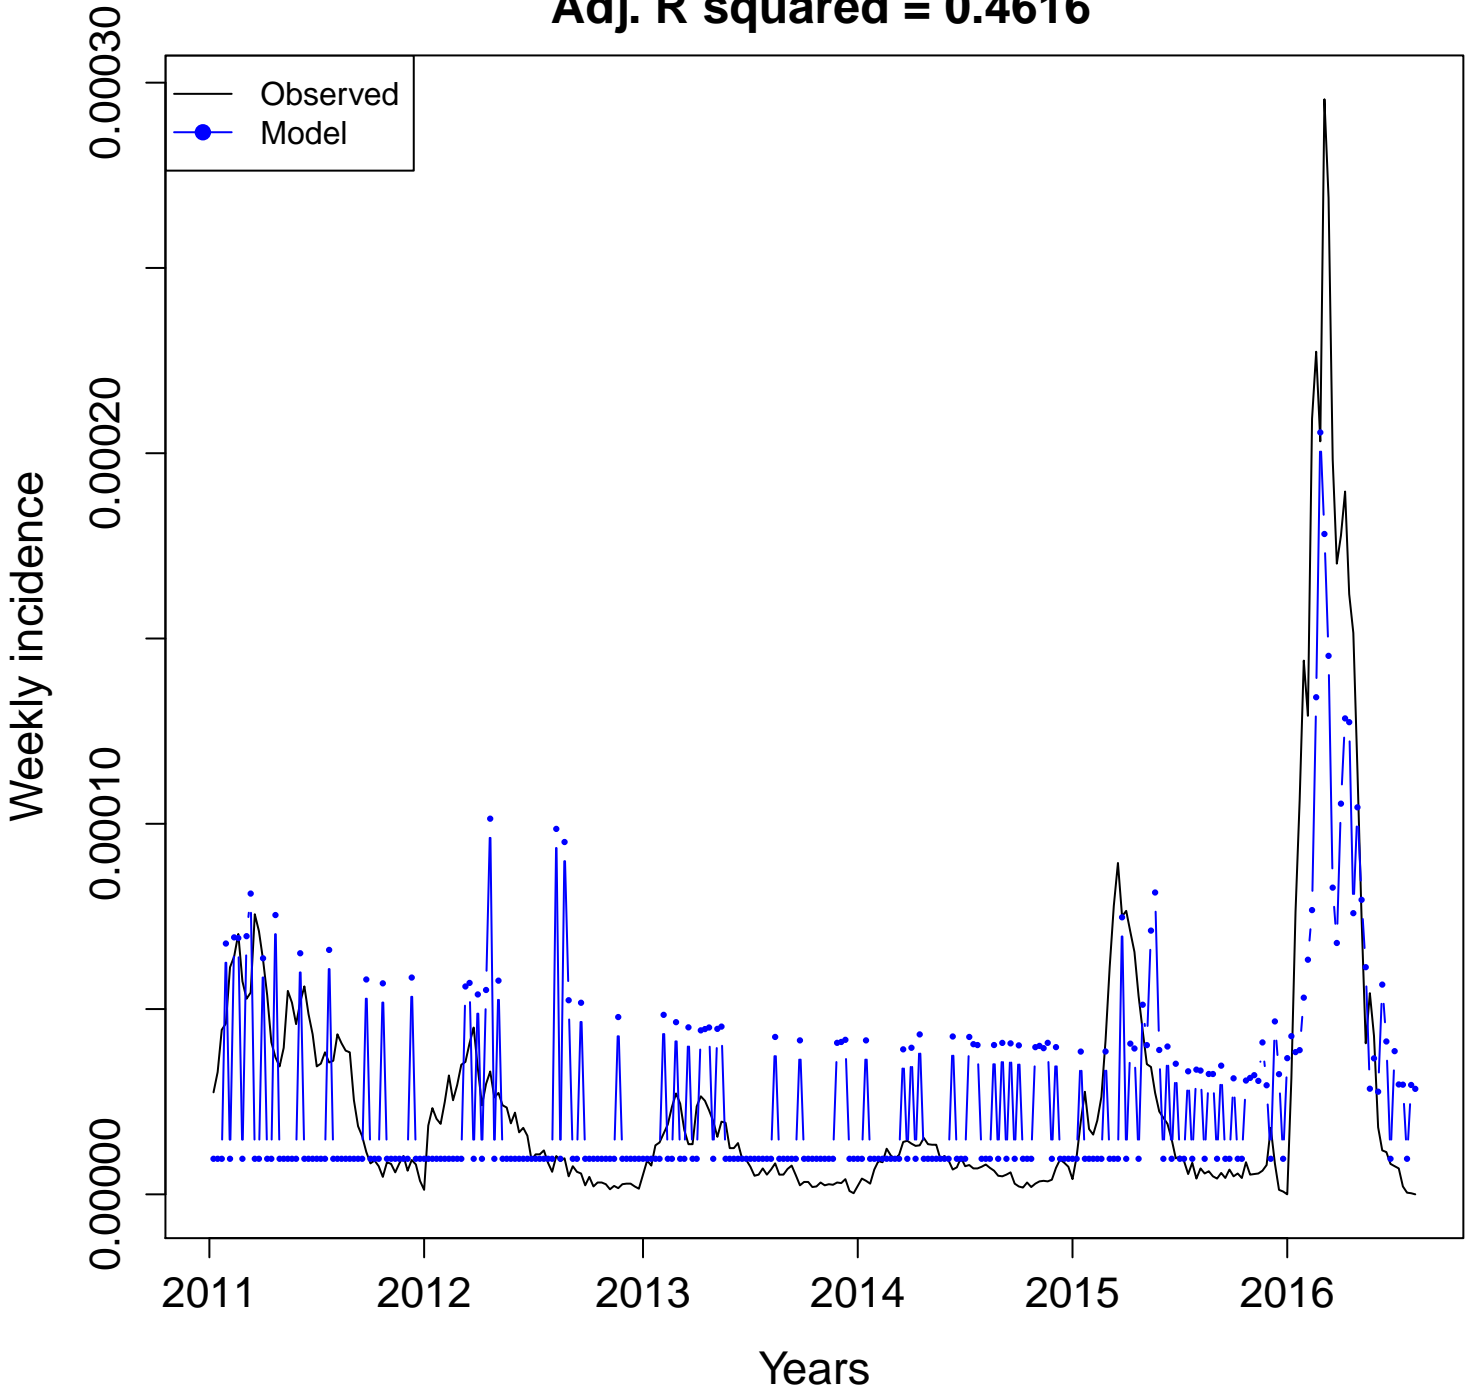



**MA- mosquito.dengue**  
**Adj. R squared = 0.6903**

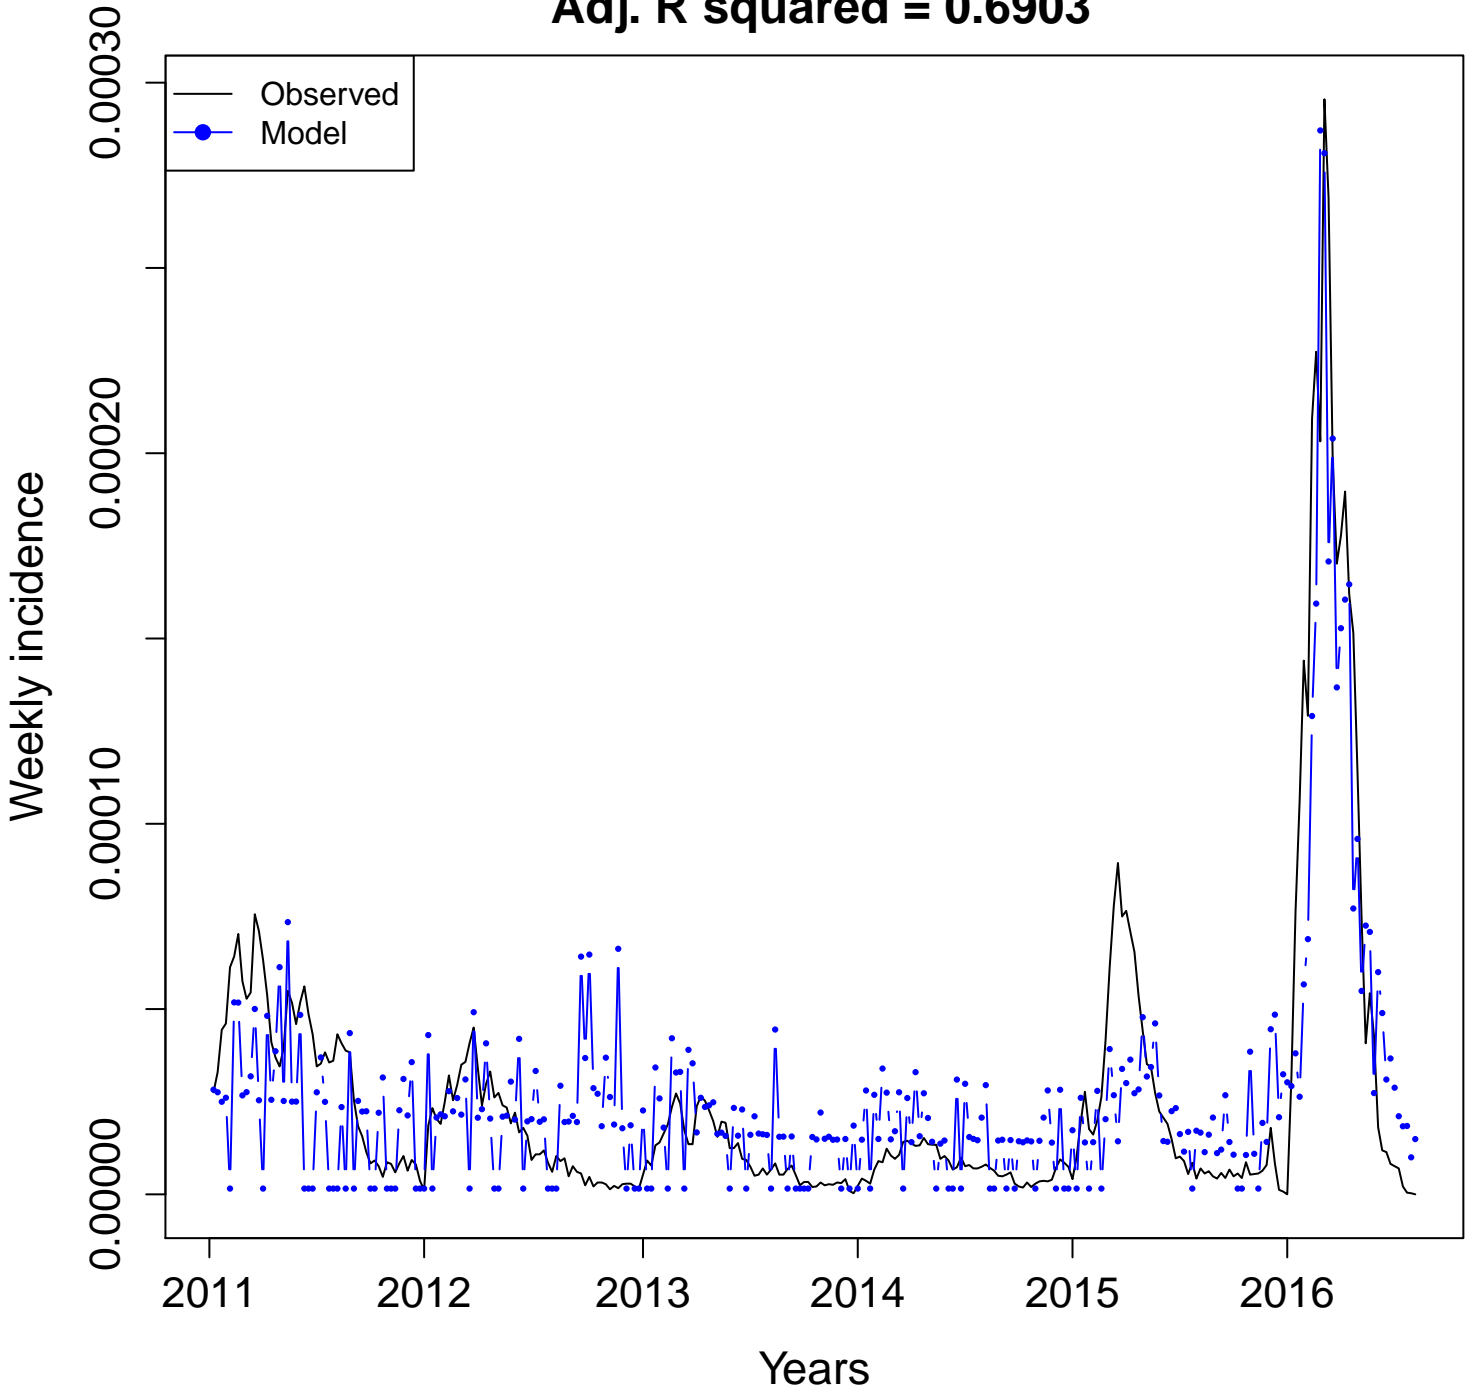

**MA- mosquito**  
**Adj. R squared = 0.7863**

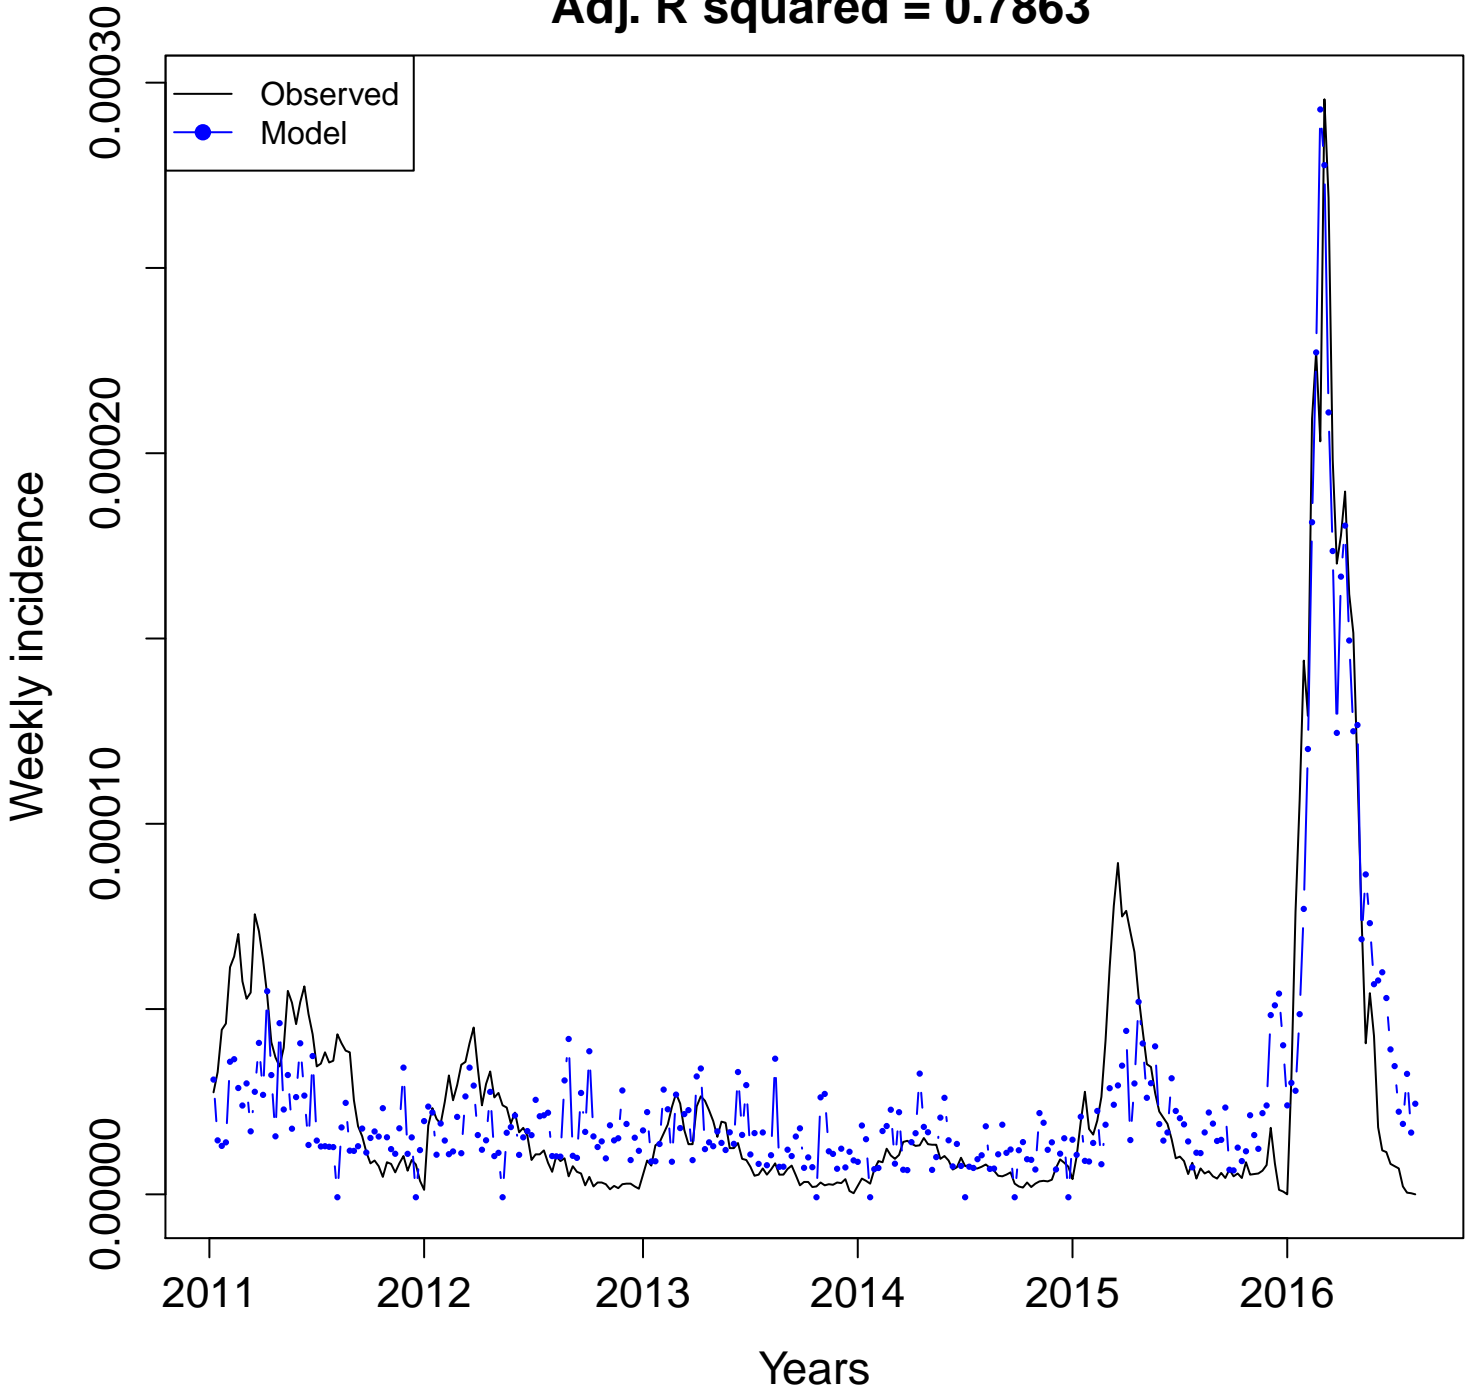

**MA- sintomas.da.dengue**  
**Adj. R squared = 0.4404**

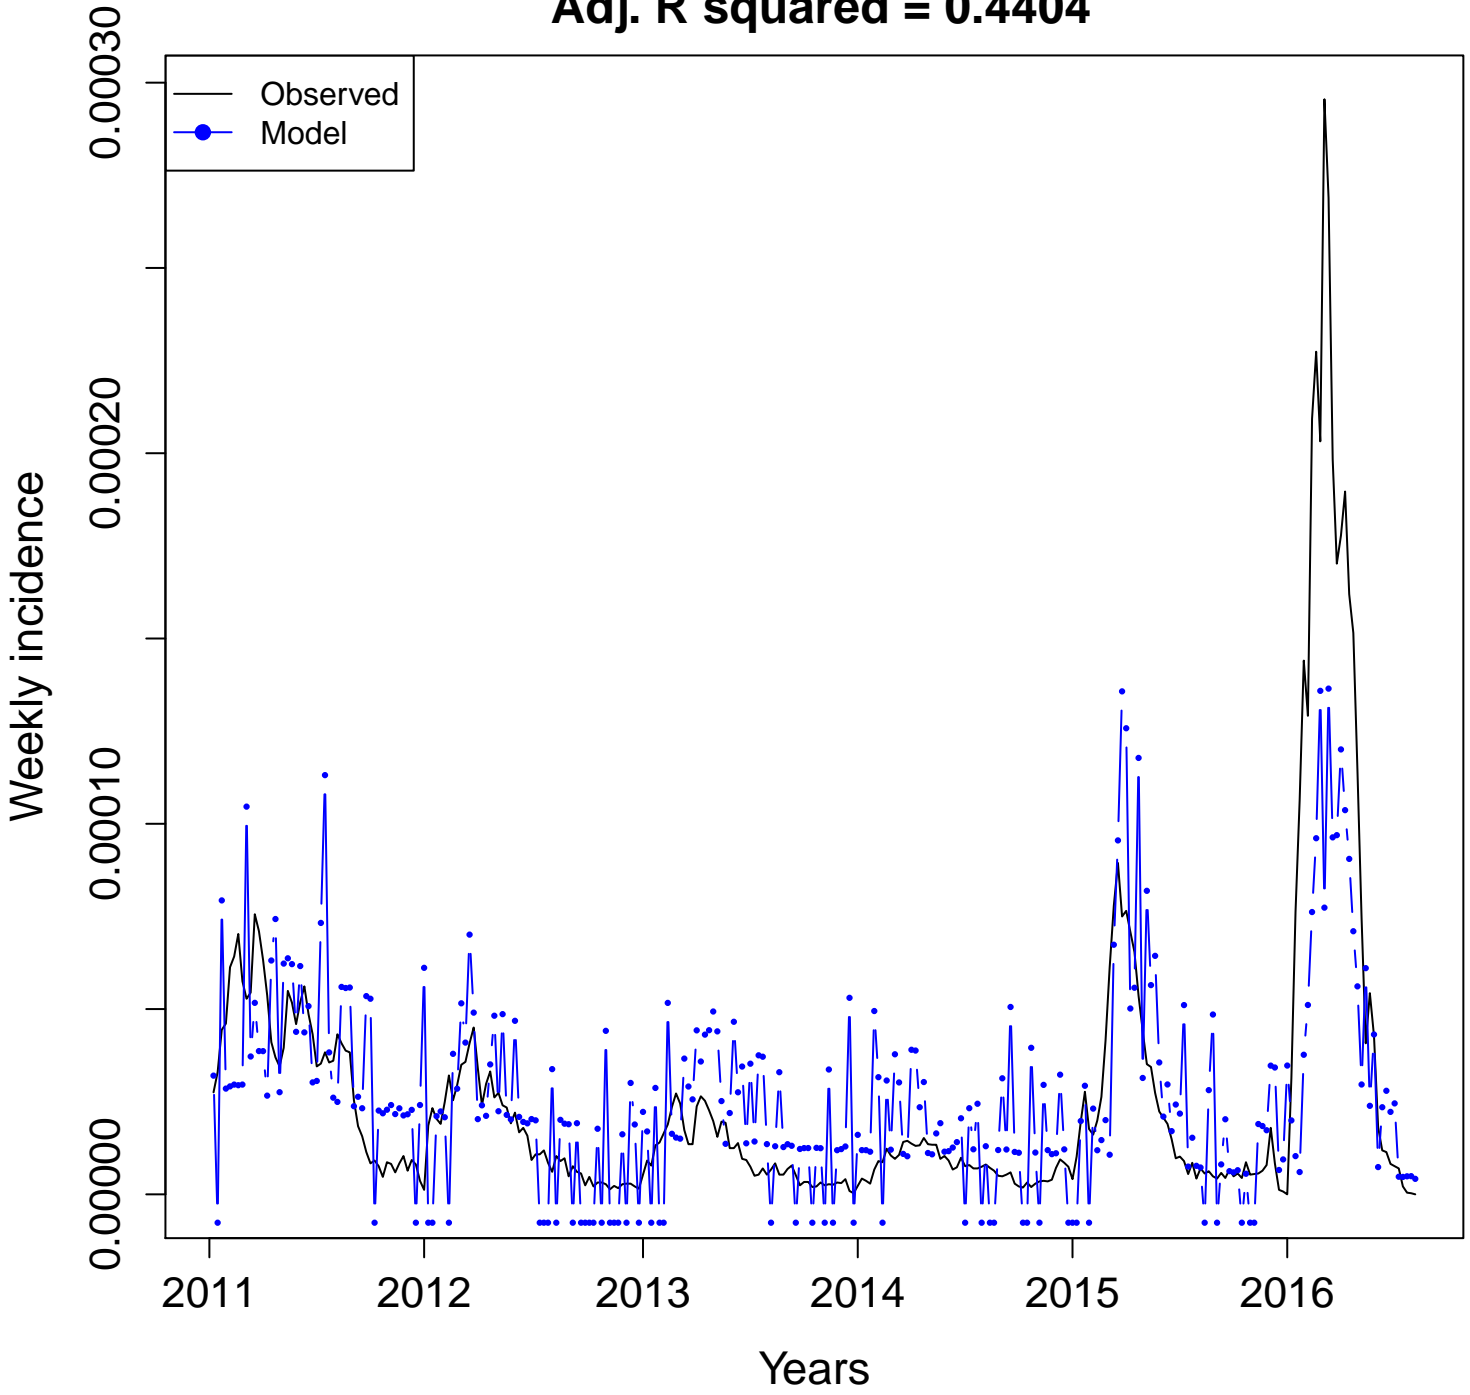

## Minas Gerais (MG)

# Dengue incidence vs. Google Health Trends (2011–2016)

### Definitions:

- **Combined terms:**
  - **All:** model with all the available terms.  $n$  = number of terms
  - **Four:** model with "dengue", "dengue sintomas", "aedes", and "mosquito".
  - **Uncorrelated:** model with non-correlated terms.  $n$  = number of uncorrelated terms
- **Individual terms:** Plots developed with one term at a time.
- Terms for all and uncorrelated models can be found in additional file 3.

**Combined terms**  
**Adjusted R squared**

**Minas Gerais (MG)**

All  
(n = 12)

BR-MG  
Adj. R squared = 0.9229

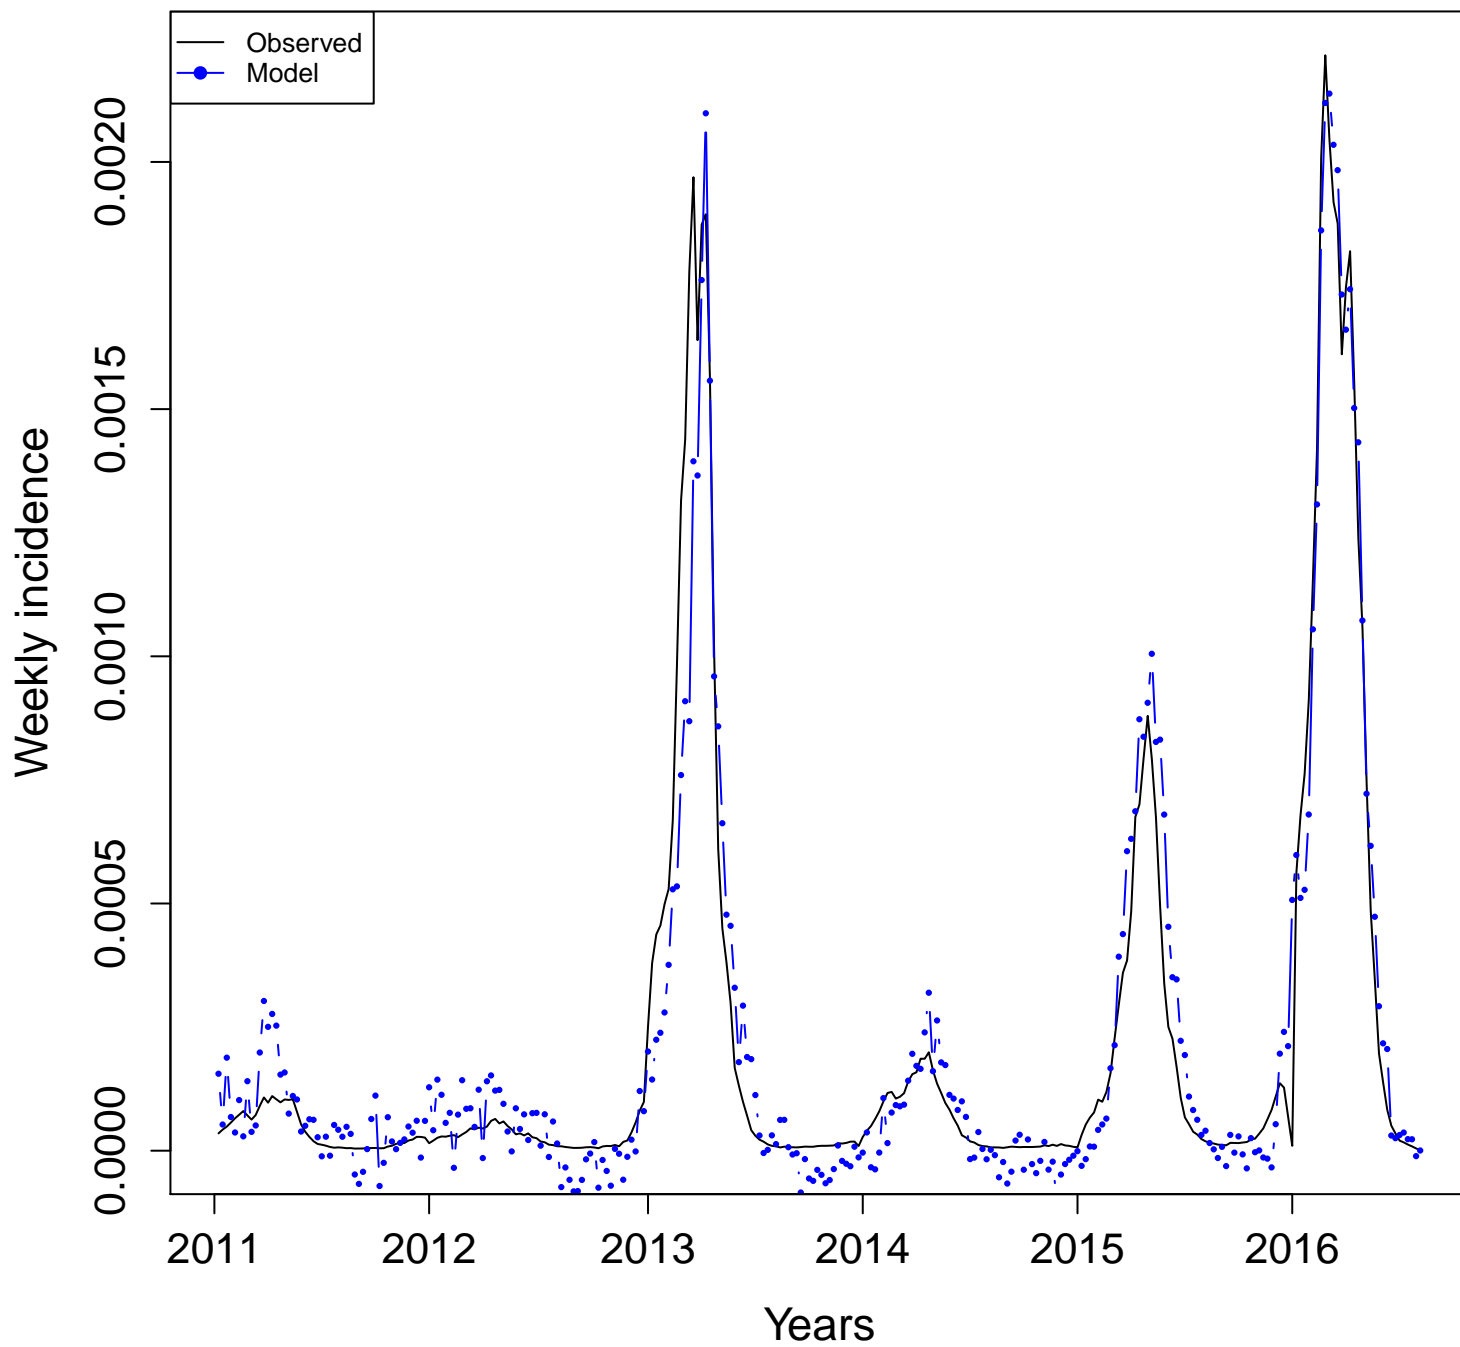

**BR-MG**  
**Adj. R squared = 0.9188**

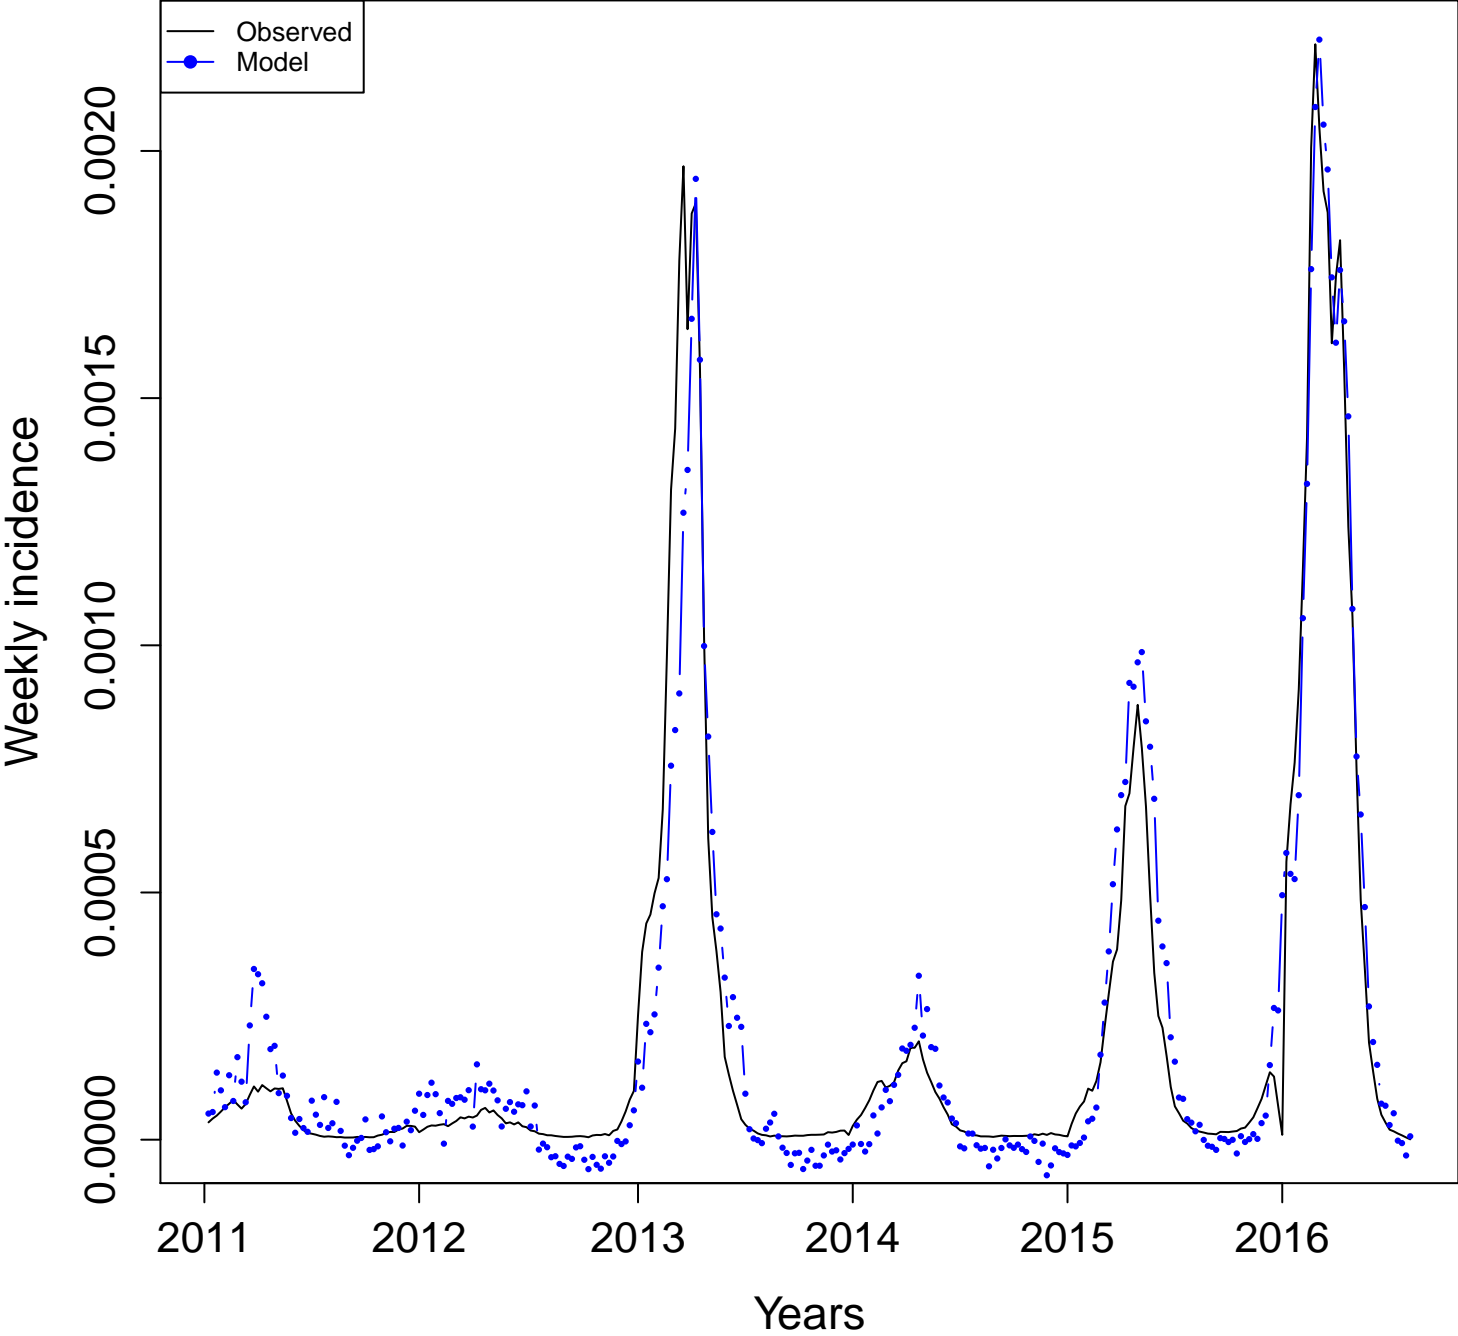

**Uncorrelated  
(n = 4)**

**BR-MG  
Adj. R squared = 0.7182**

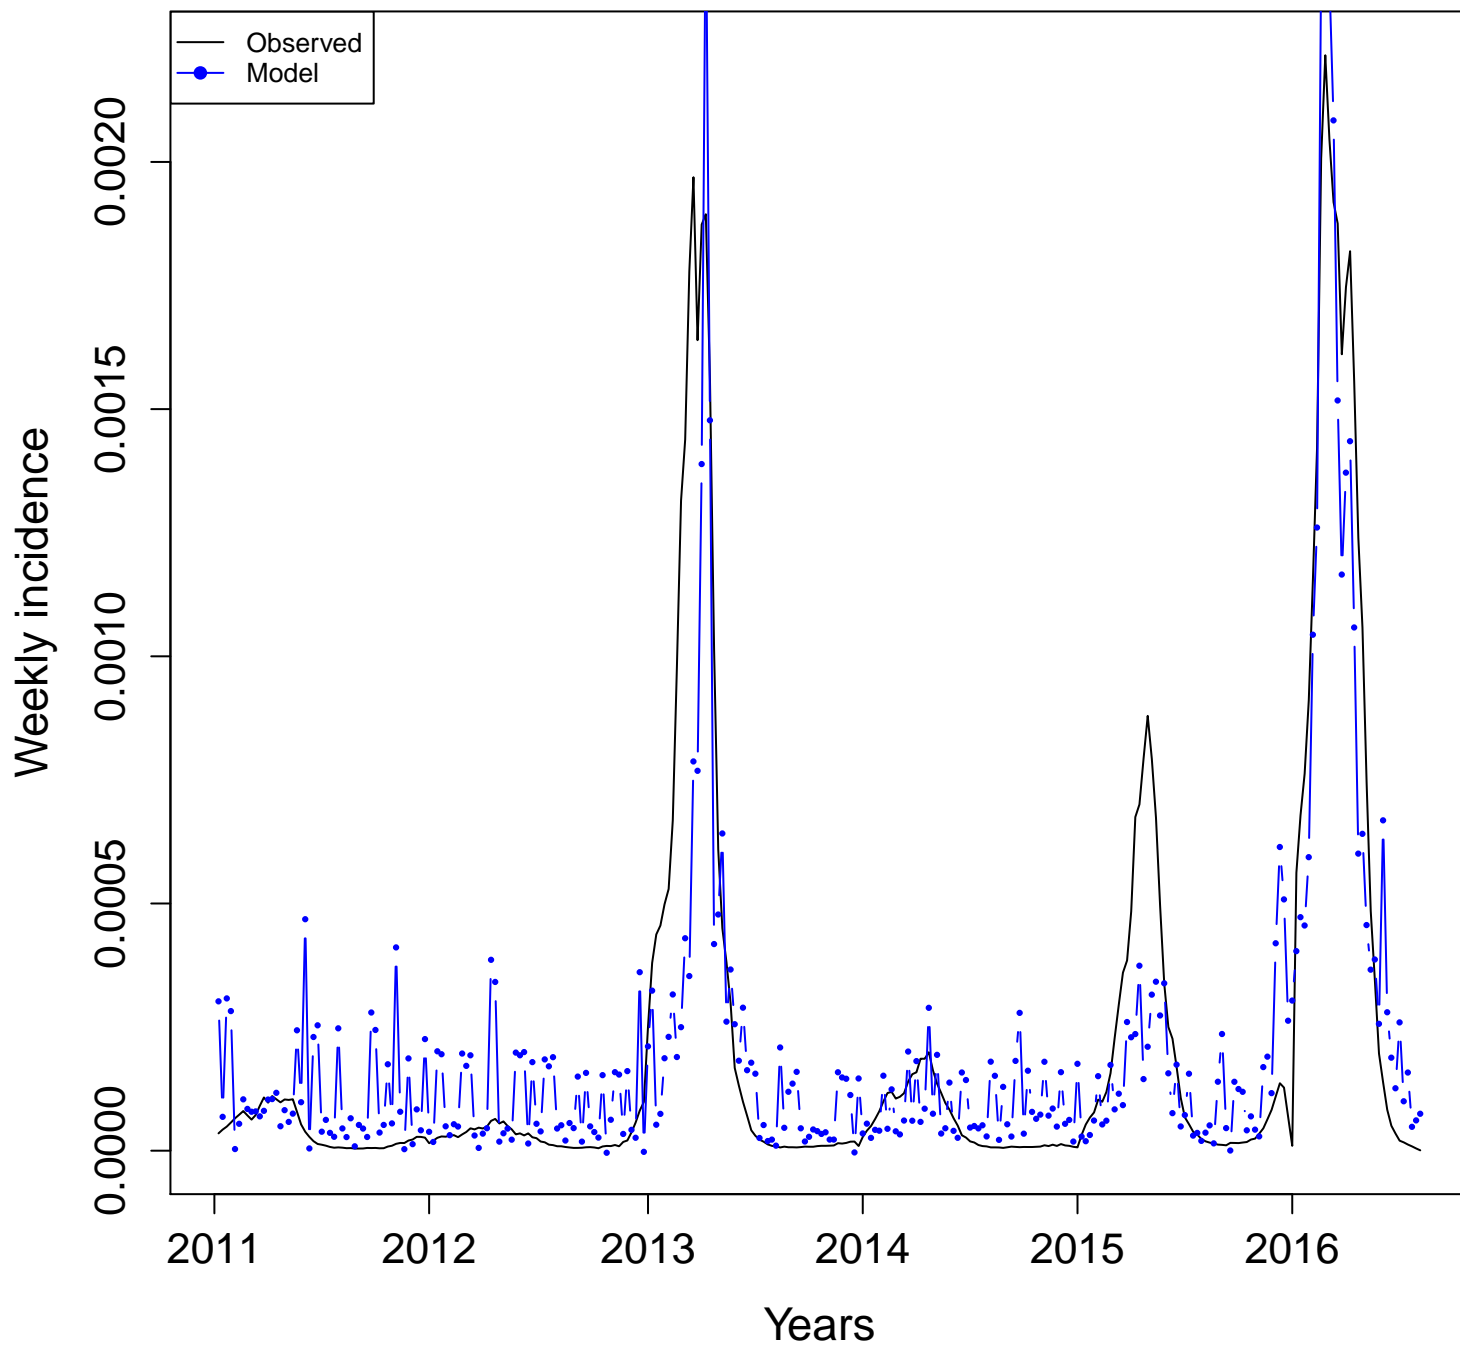



**Individual terms**  
**Adjusted R squared**

**Minas Gerais (MG)**

**MG- aedes.aegypti**  
**Adj. R squared = 0.5555**

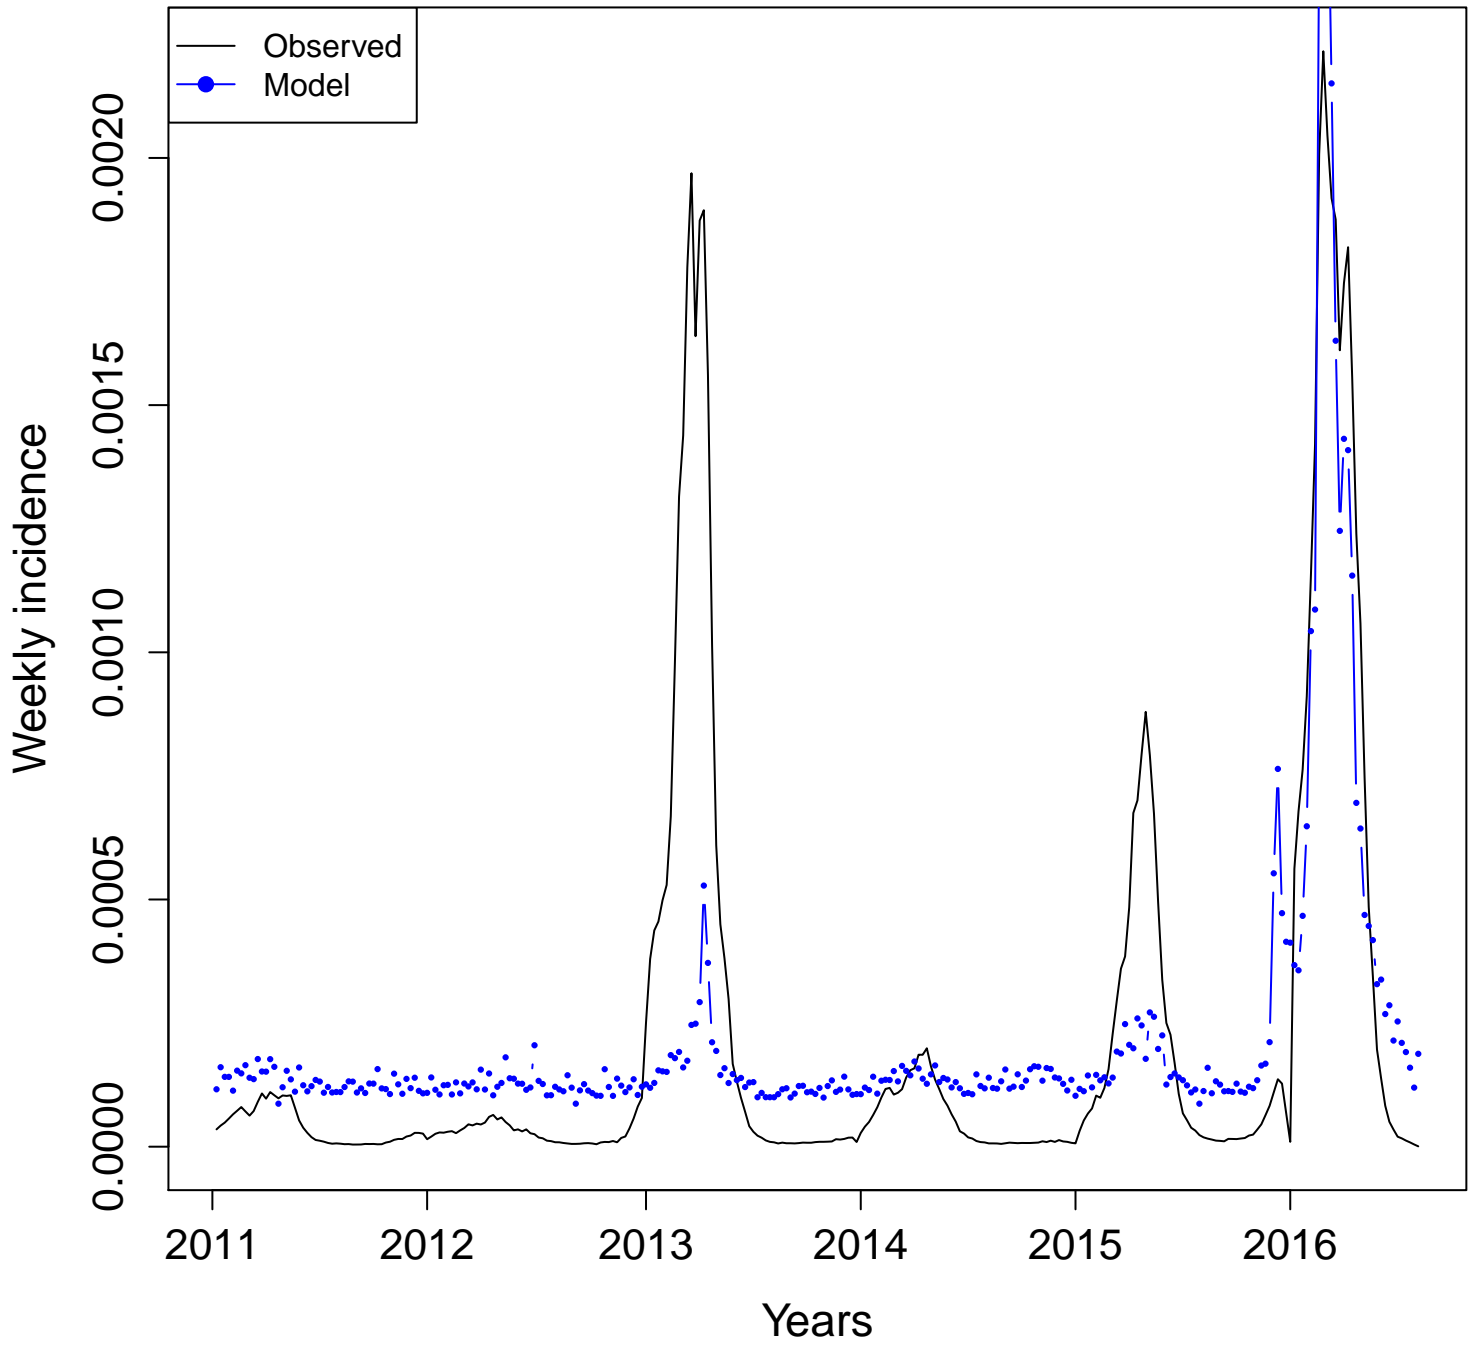

**MG- aedes**  
**Adj. R squared = 0.5508**

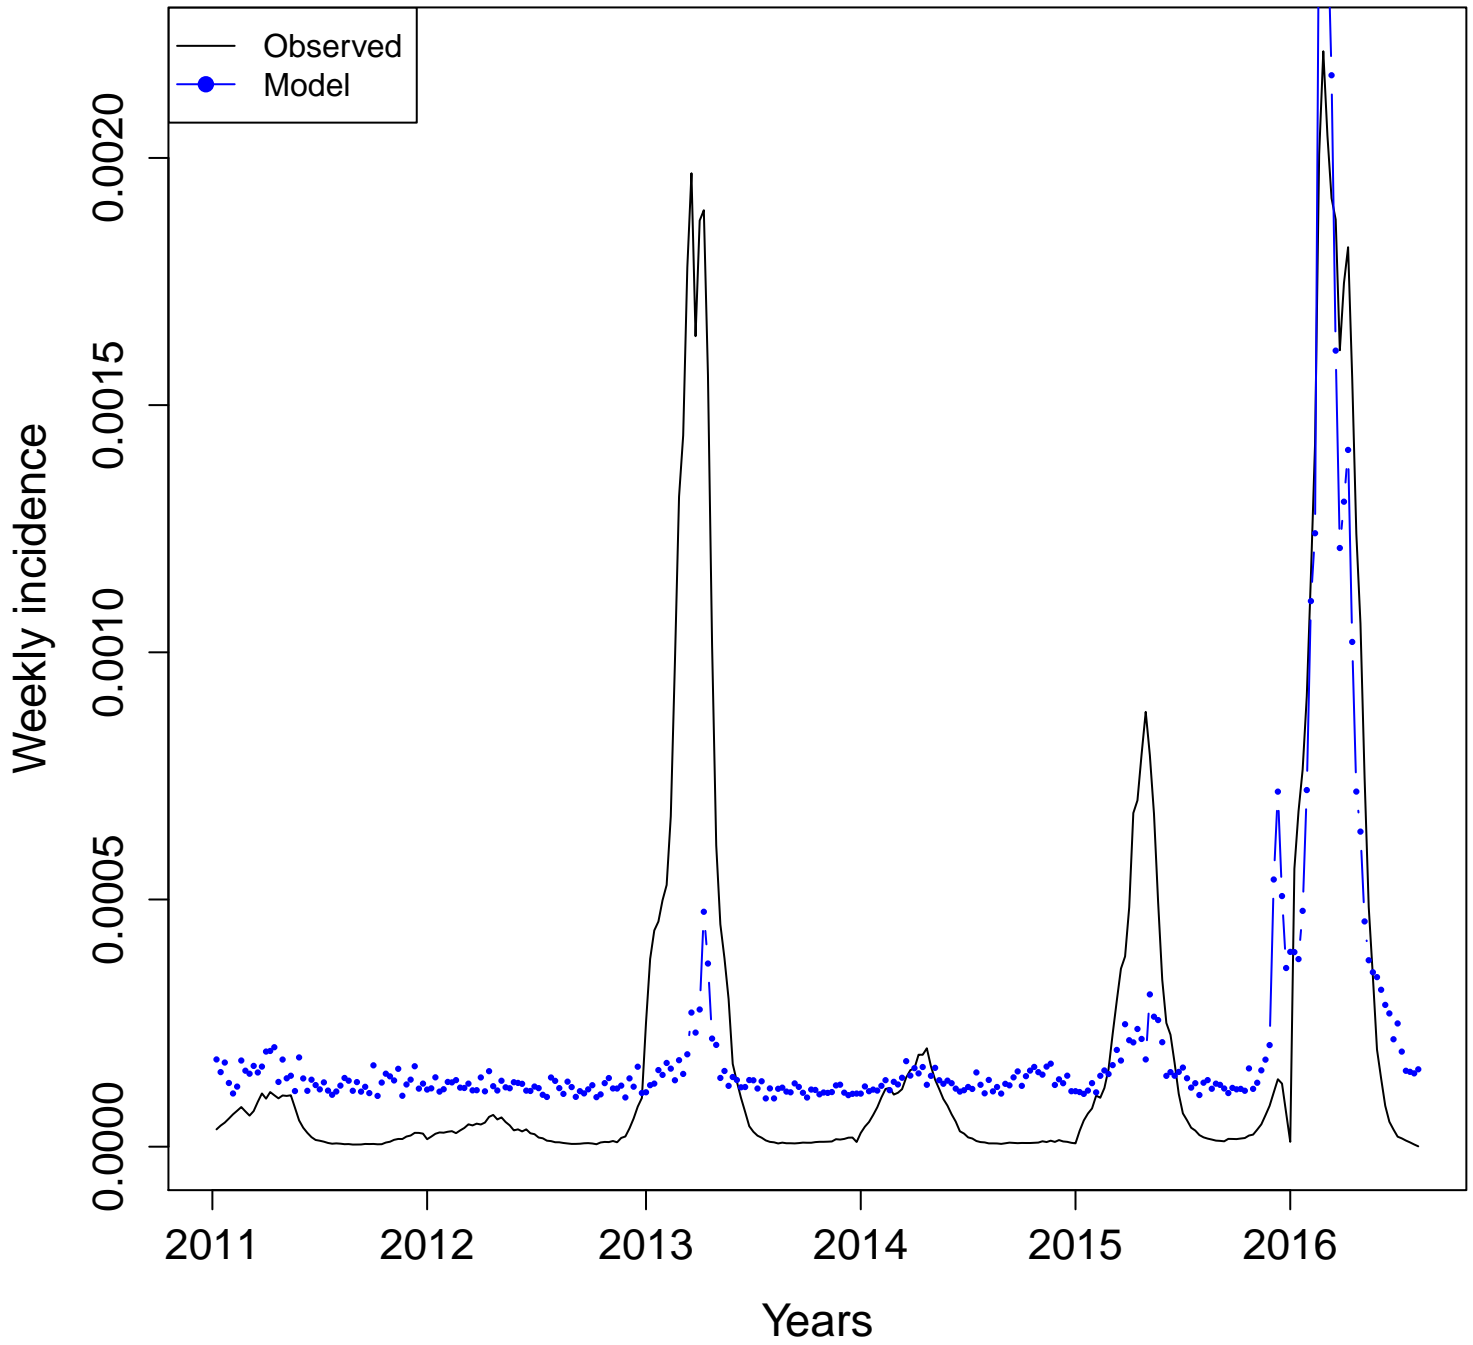

**MG- aegypti**  
**Adj. R squared = 0.5559**

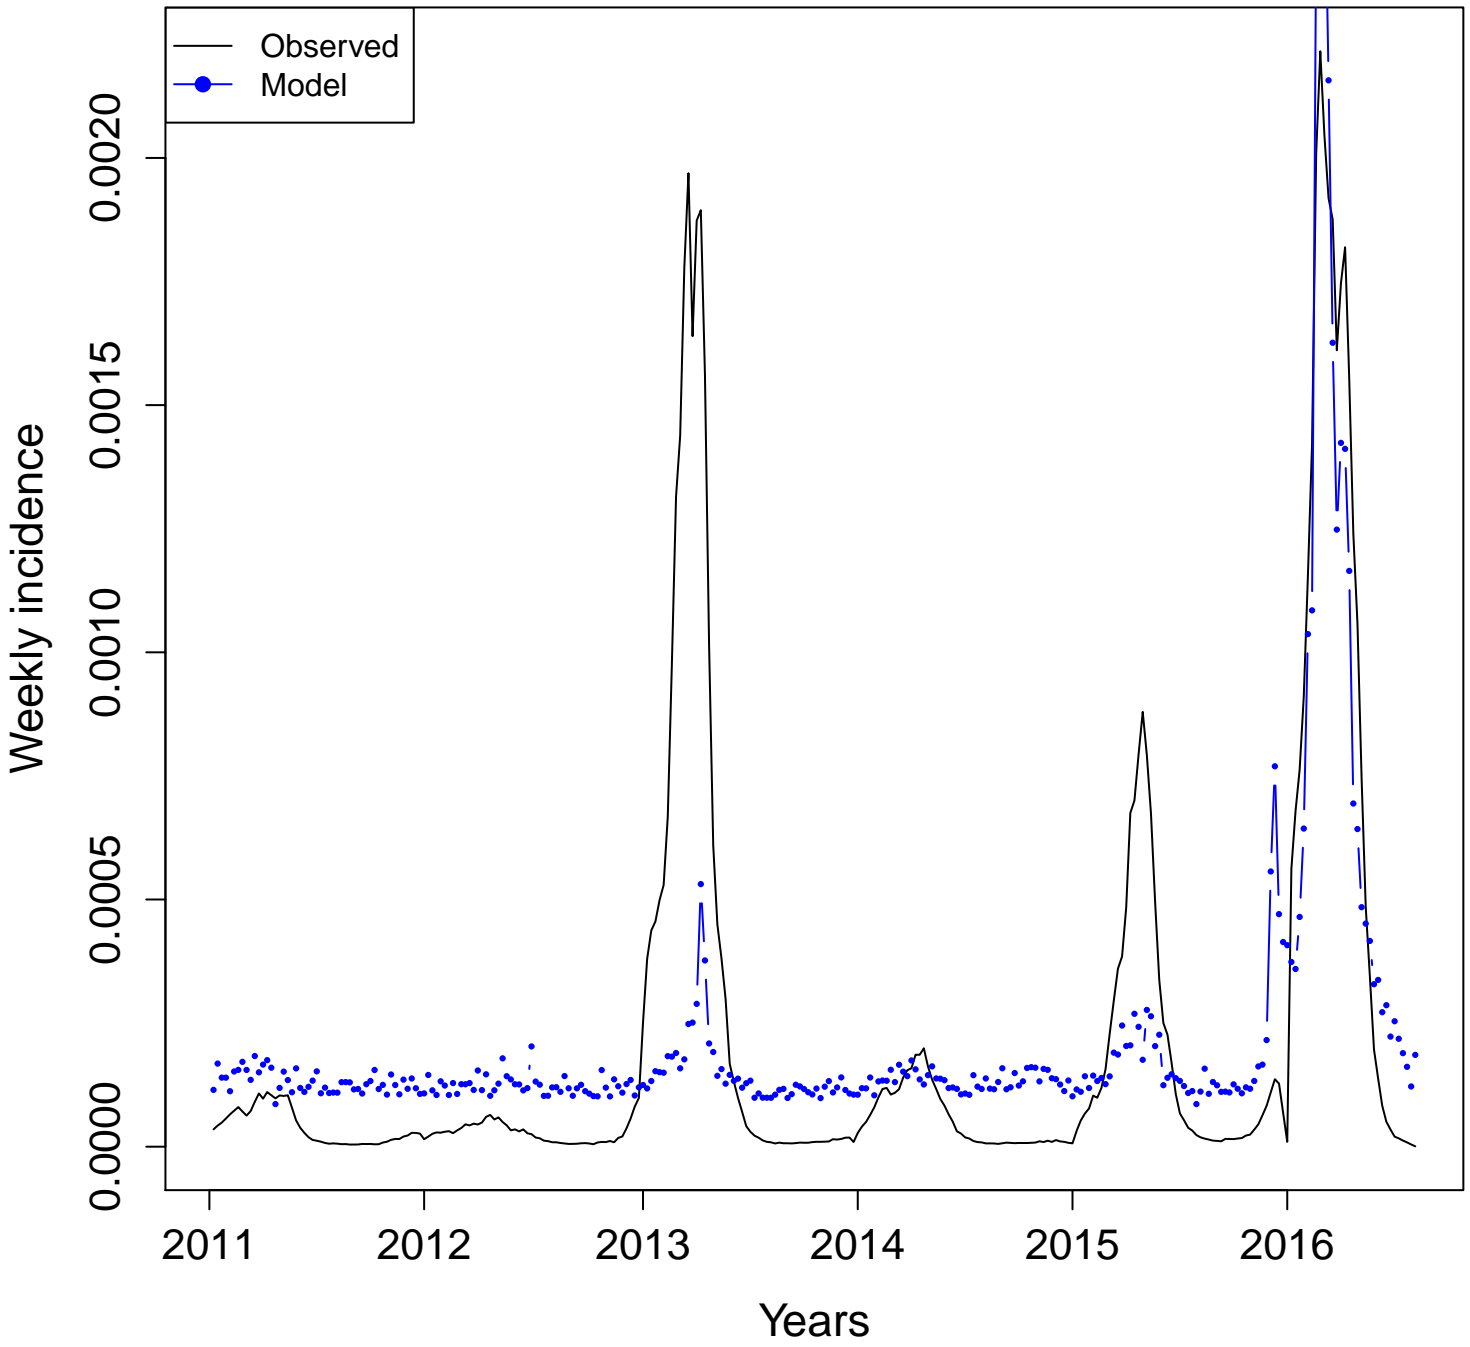

# MG- dengue.fever

Adj. R squared = 0.2394

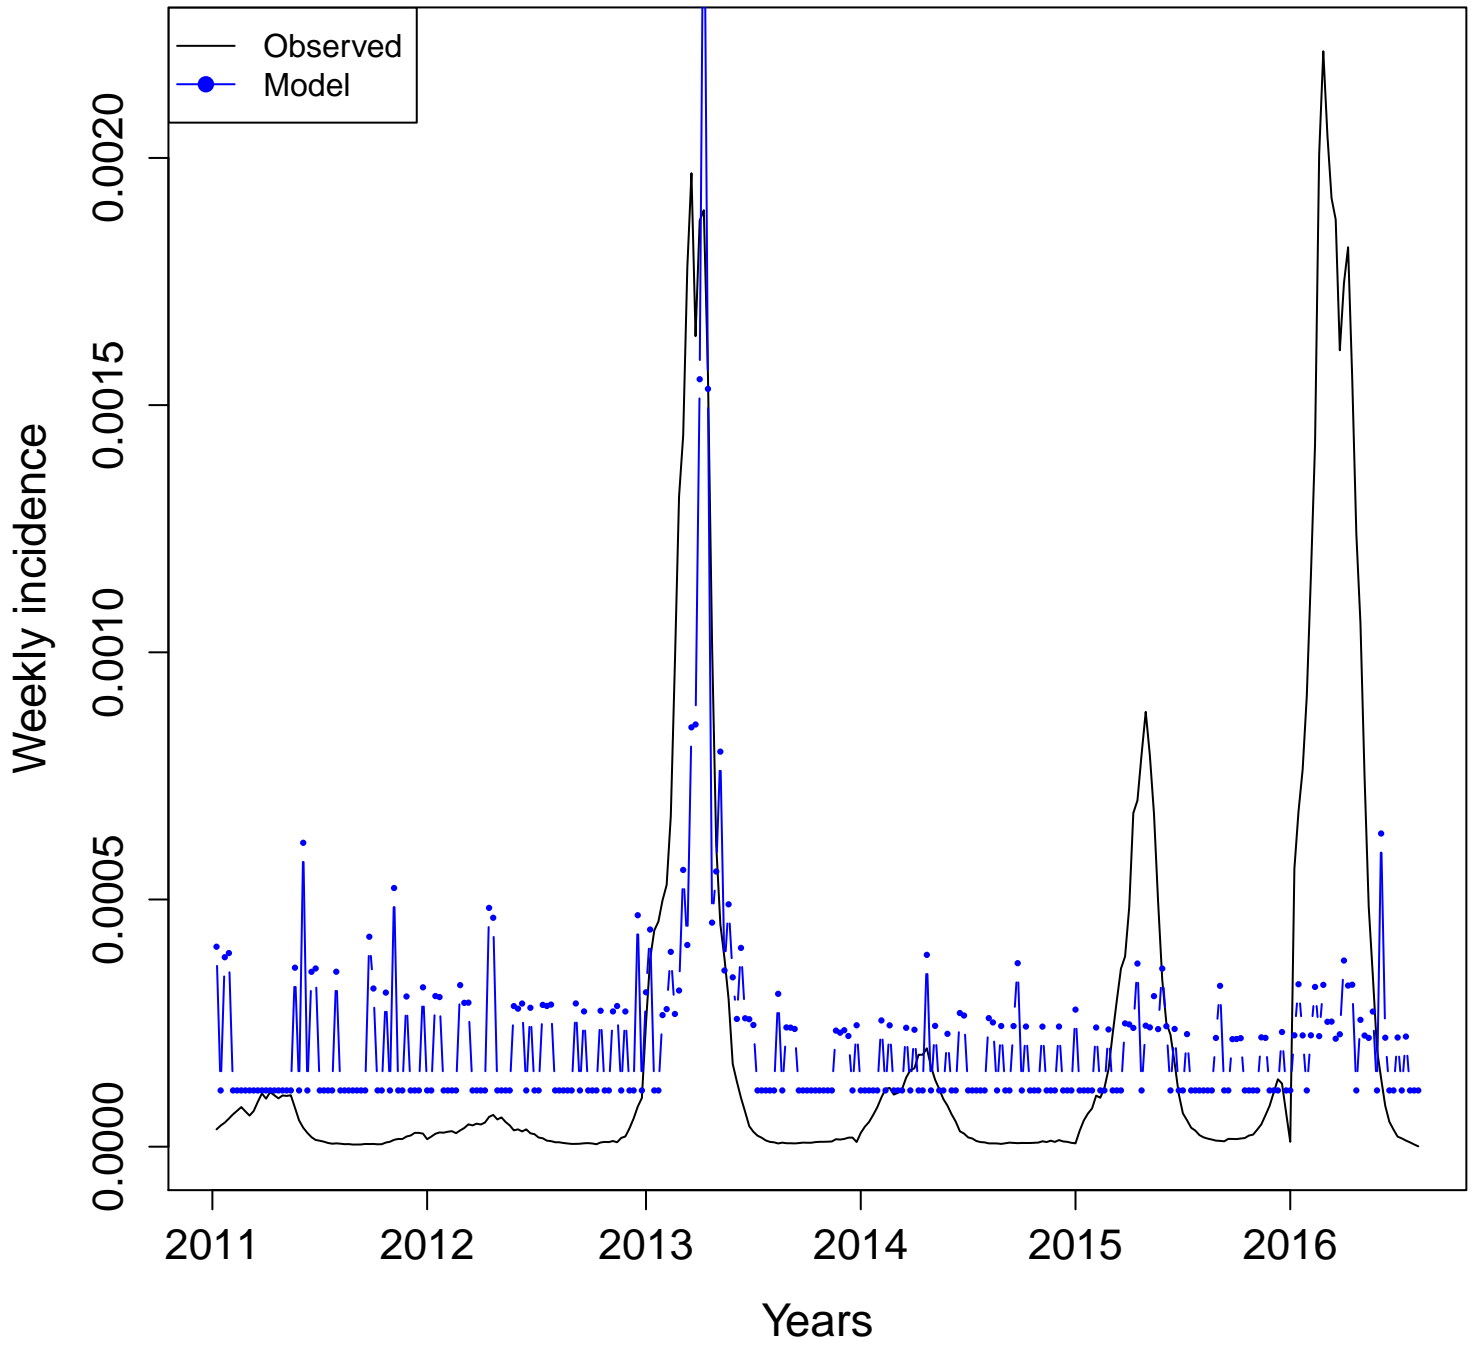

# MG- dengue

Adj. R squared = 0.8799

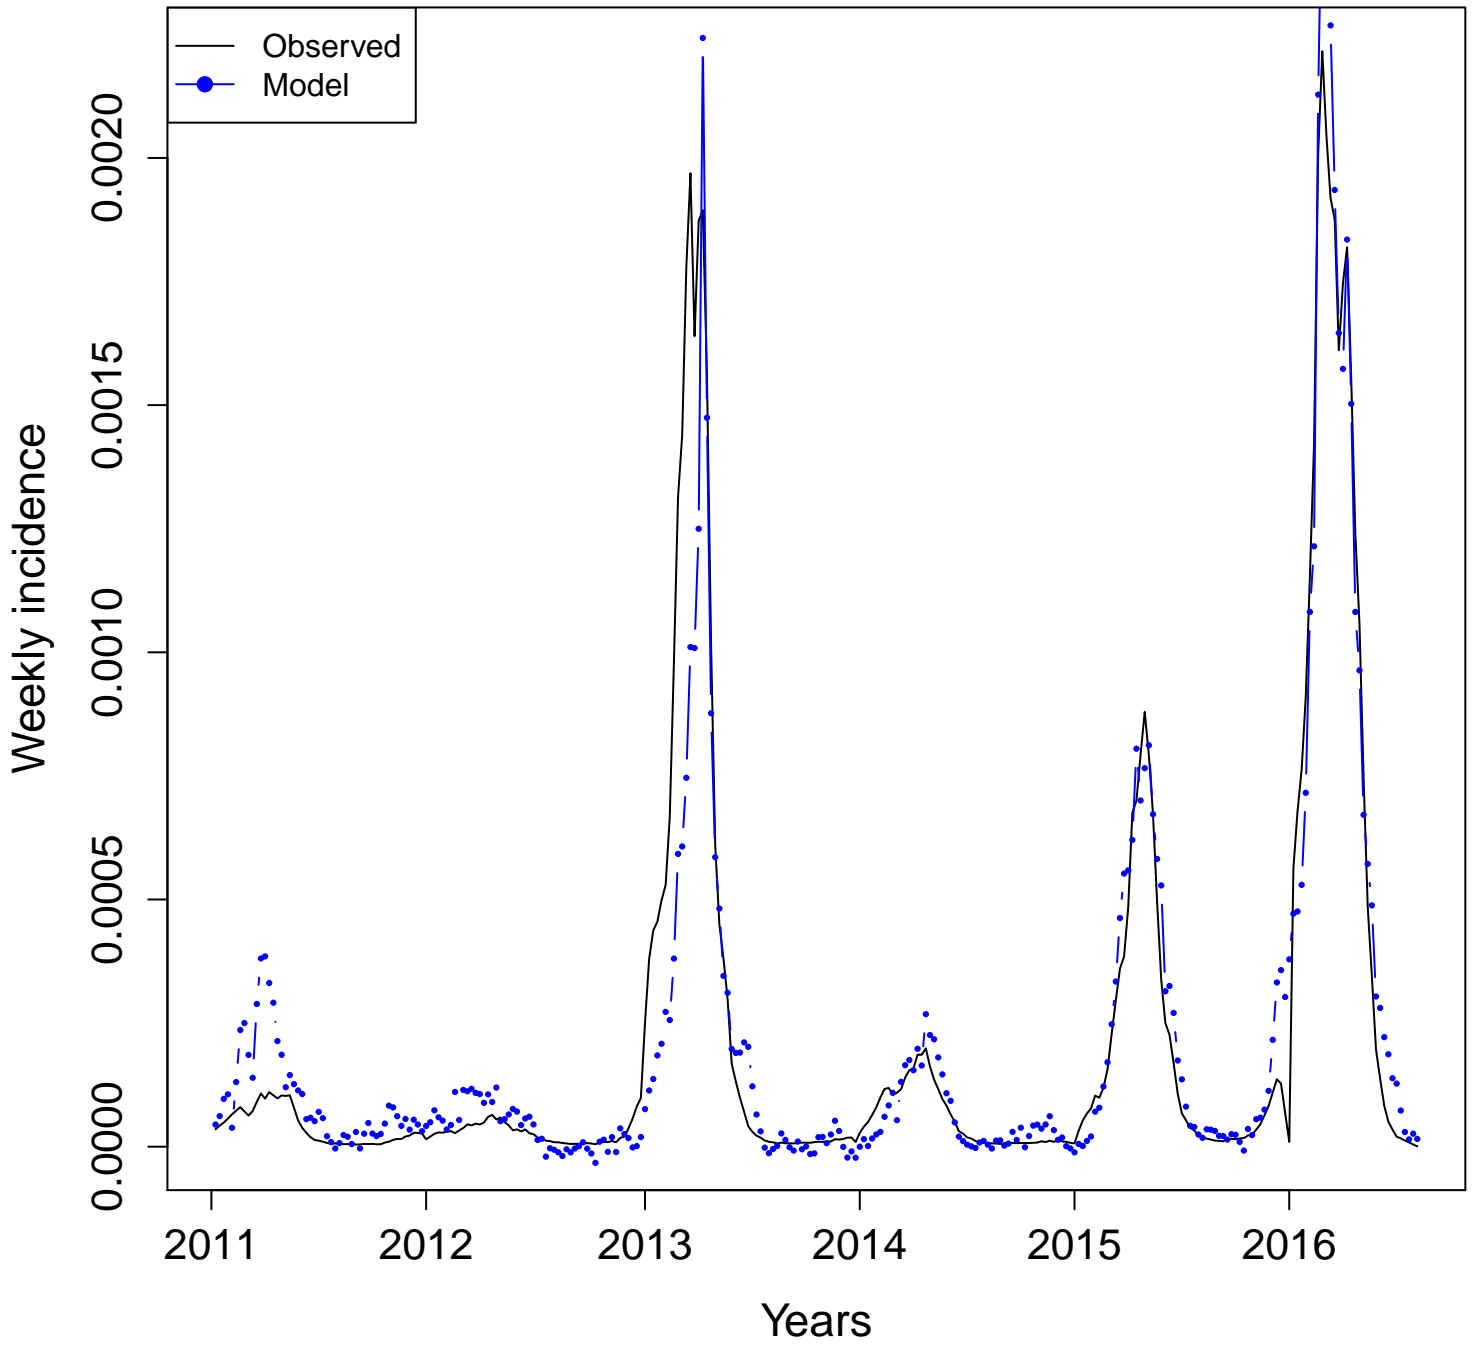

**MG- dengue.sintomas**  
**Adj. R squared = 0.9183**

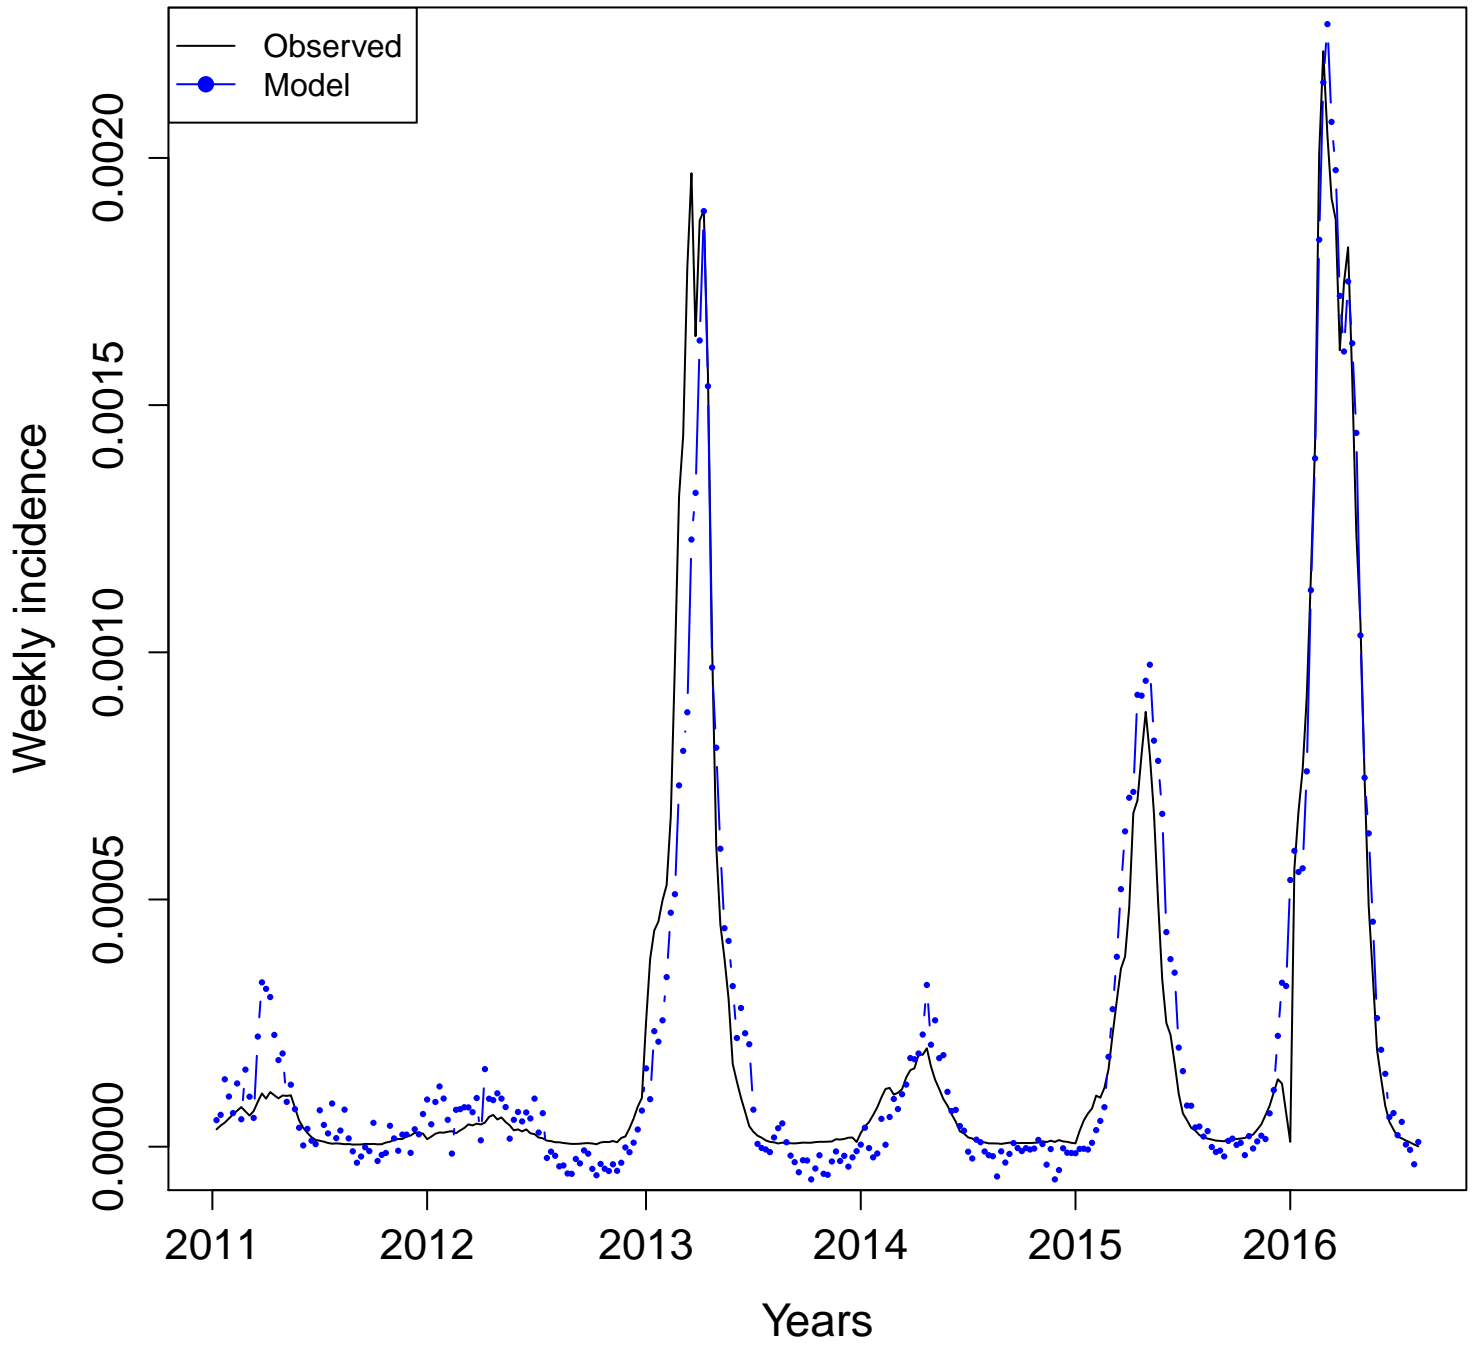

**MG- dengue.virus**  
**Adj. R squared = 0.5912**

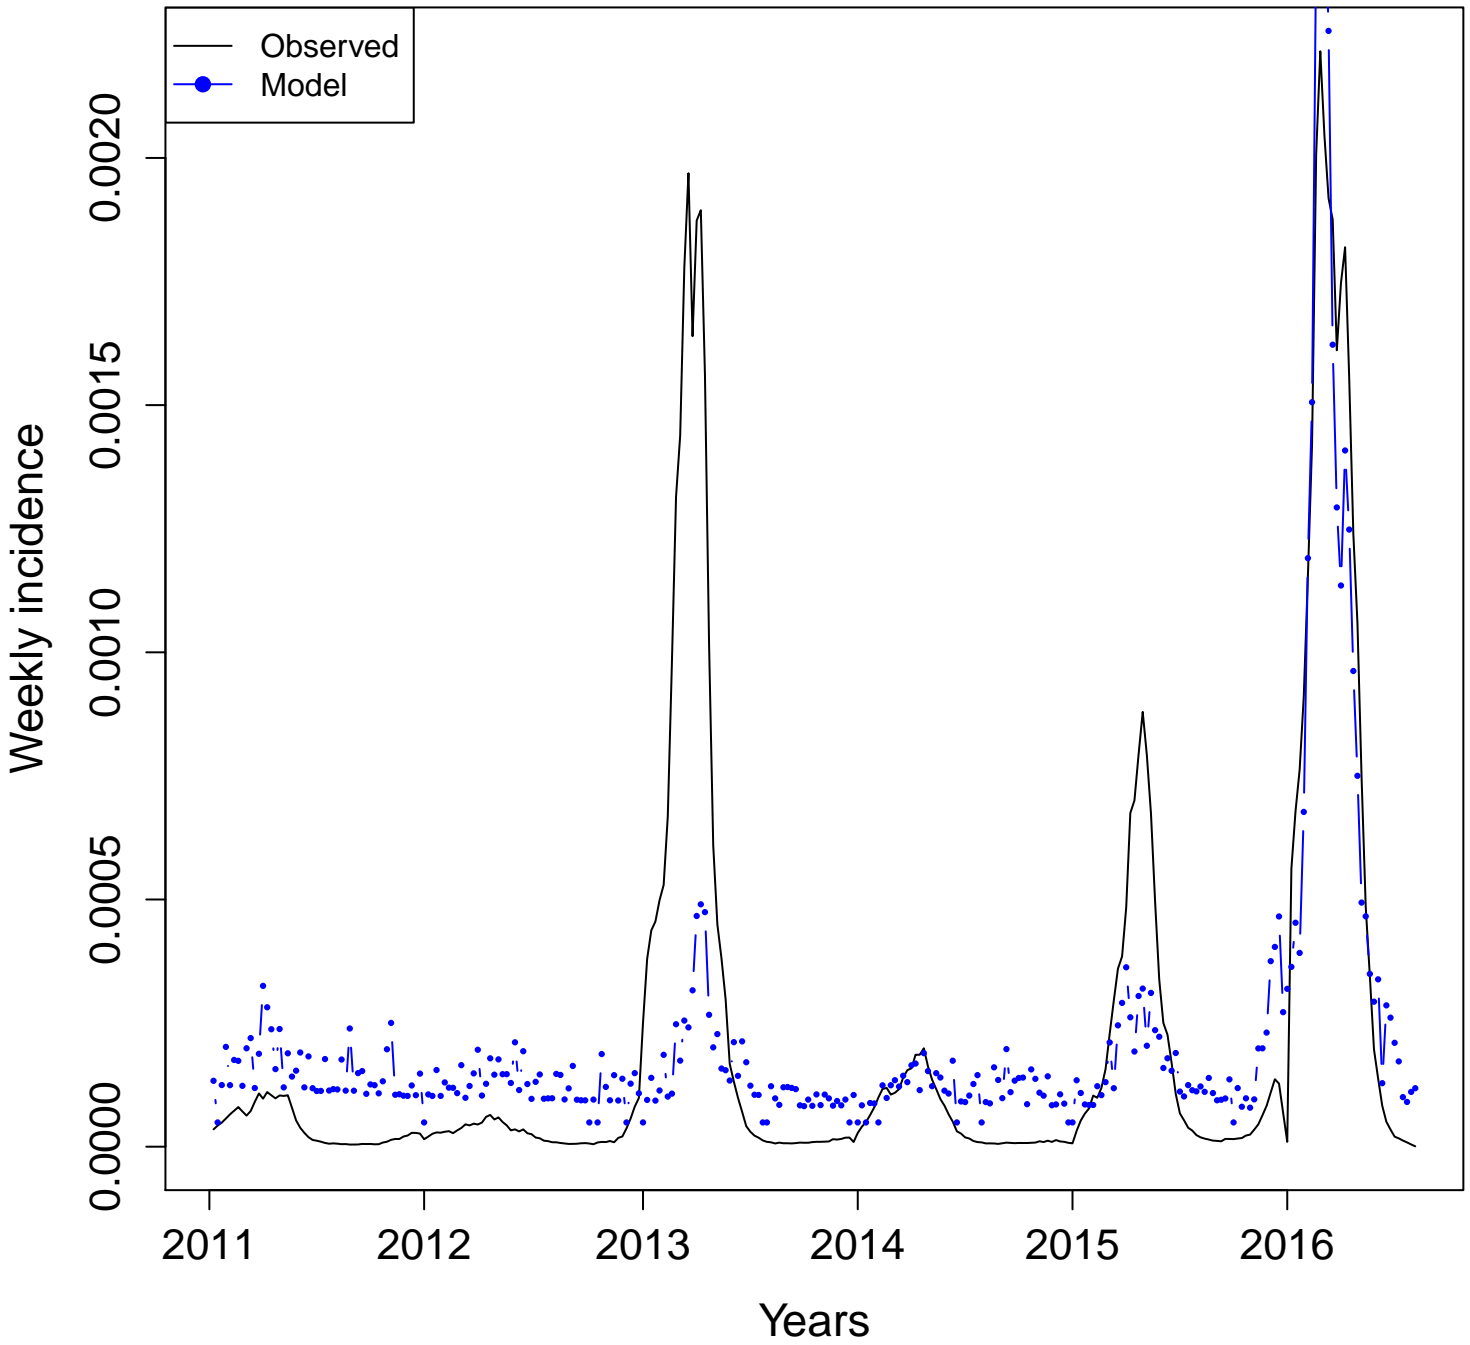



**MG- DHF**  
**Adj. R squared = -0.0034**

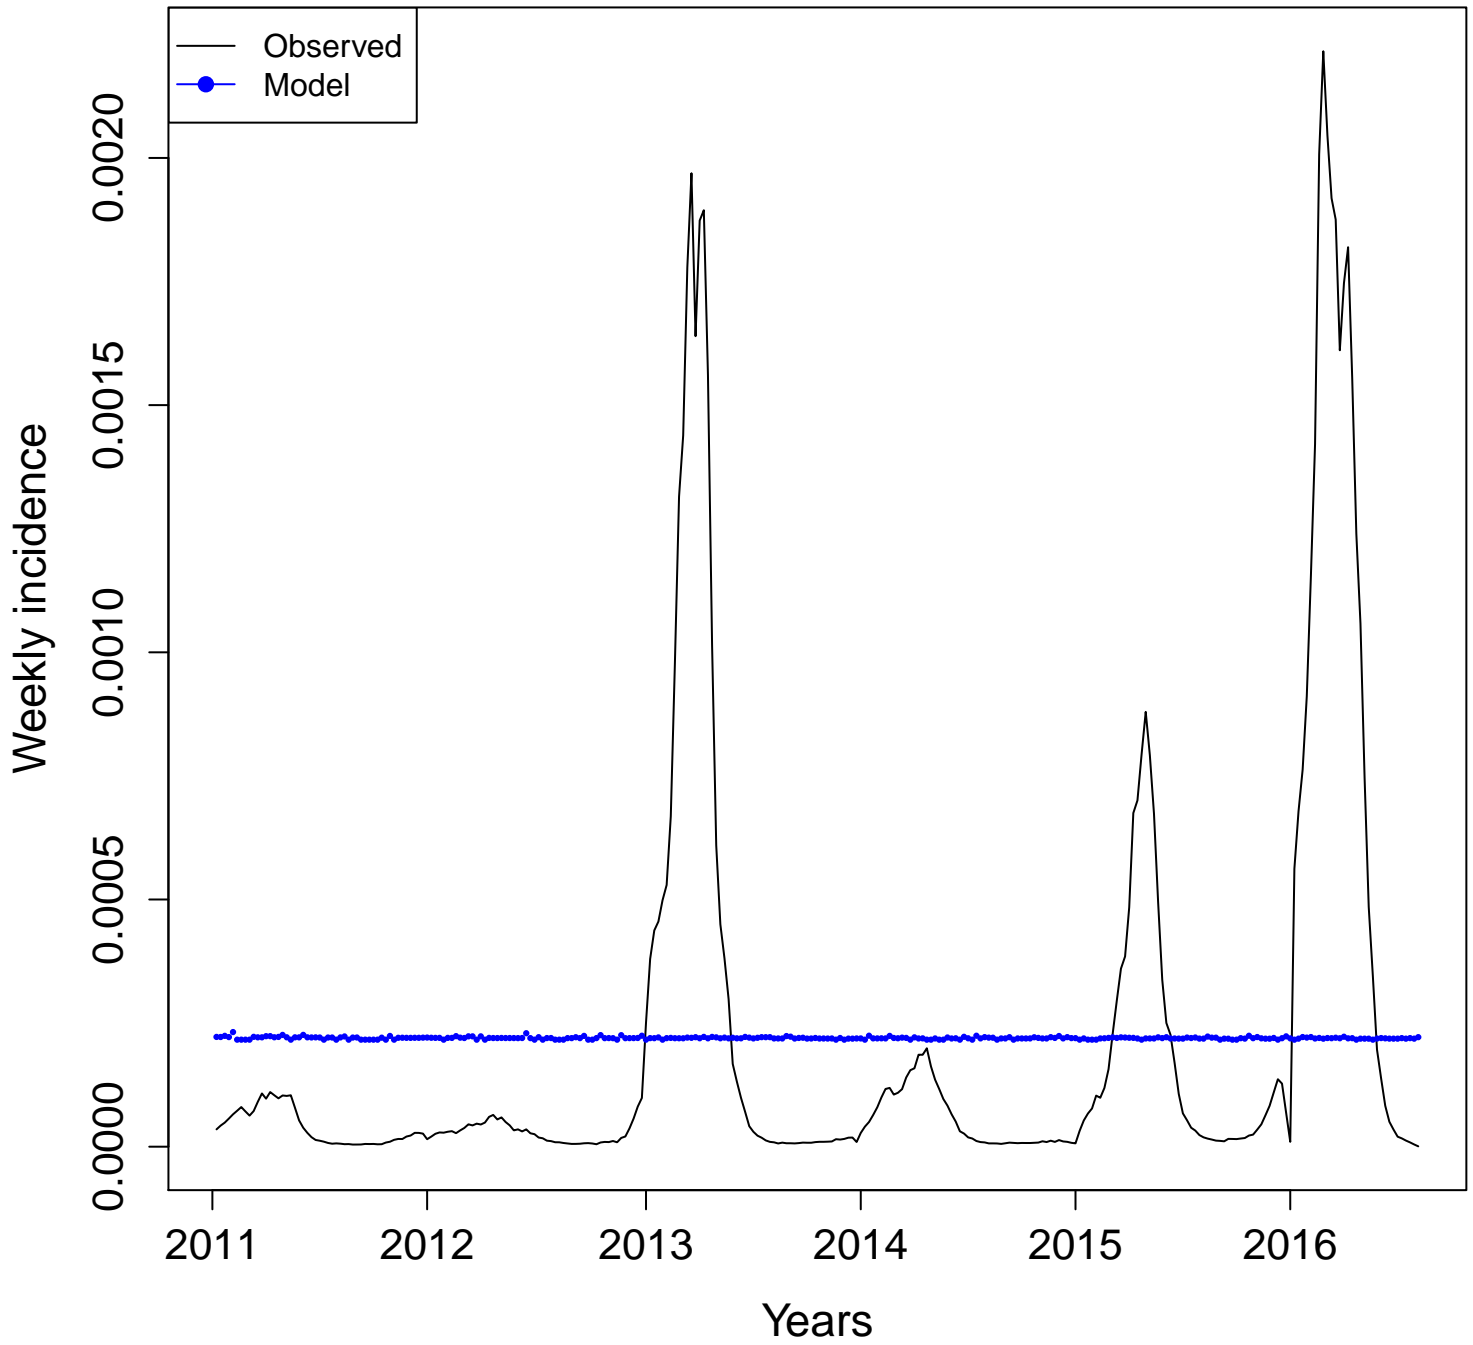

**MG- mosquito.dengue**  
**Adj. R squared = 0.7608**

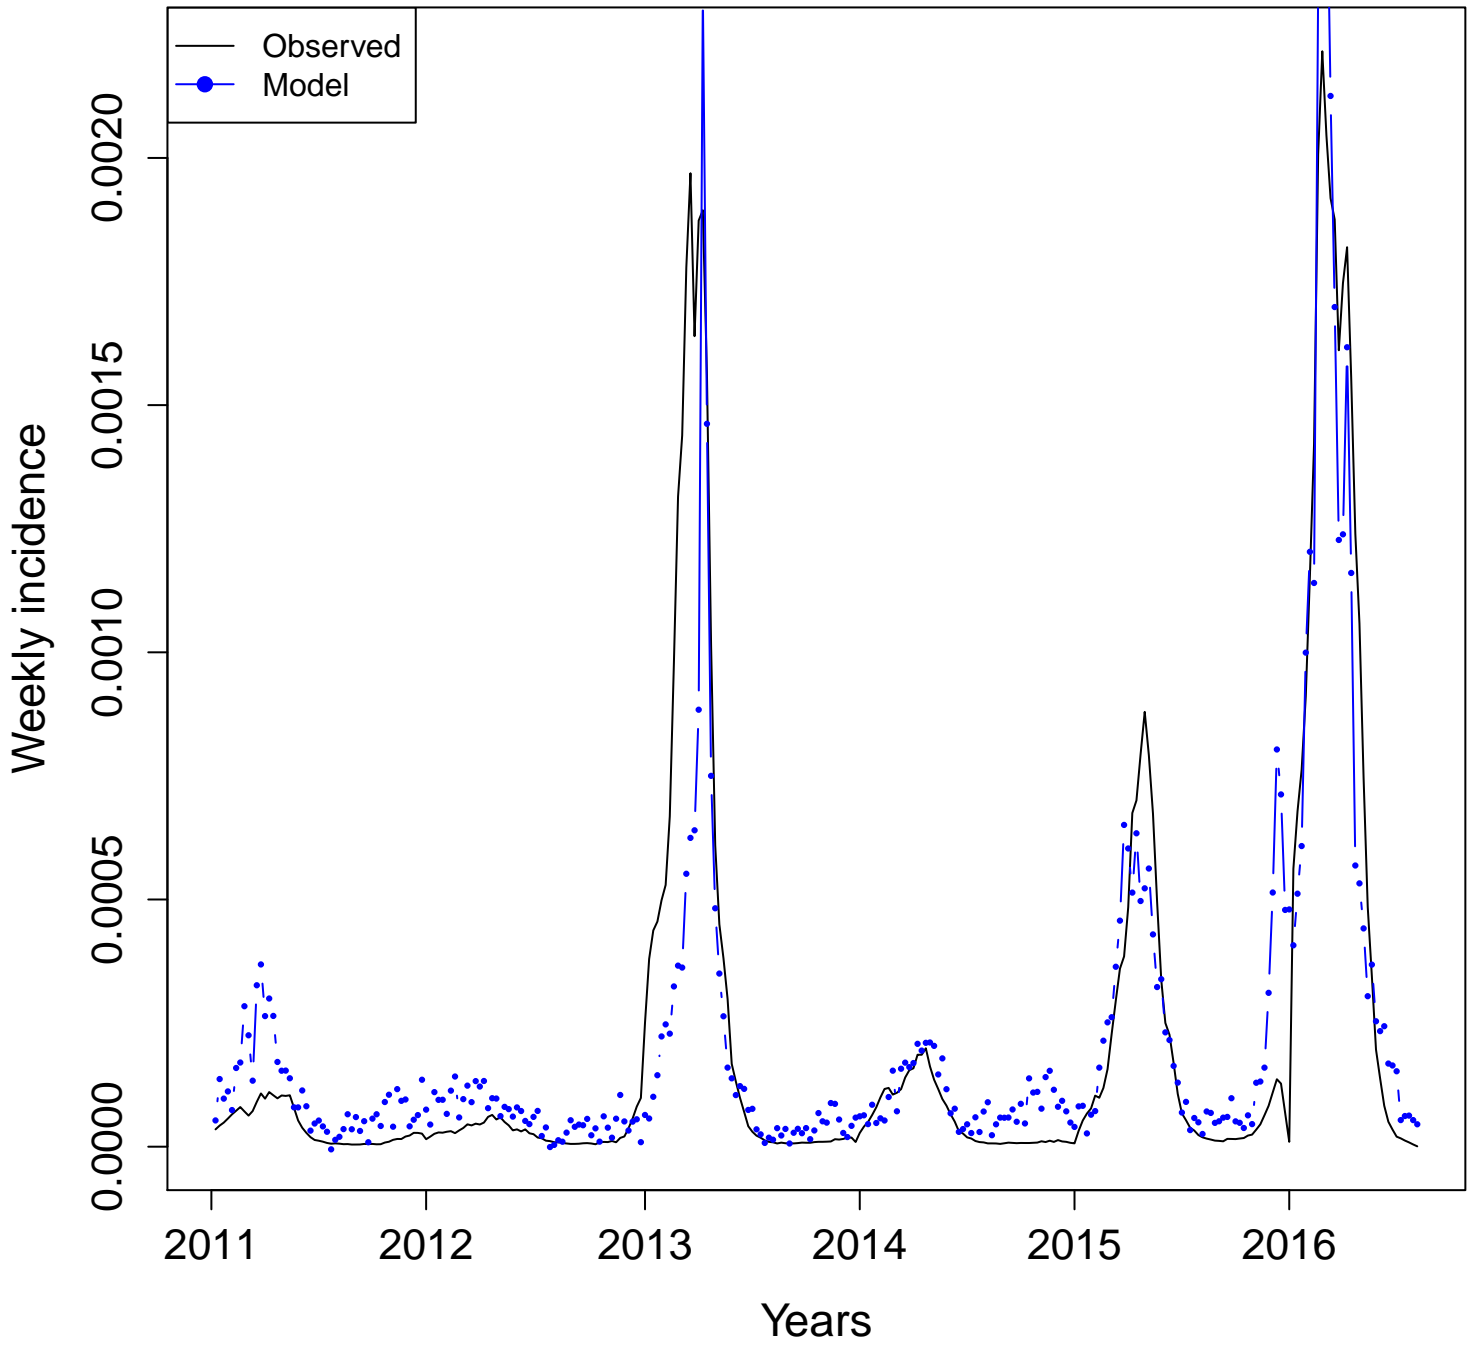

# MG- mosquito

Adj. R squared = 0.7047

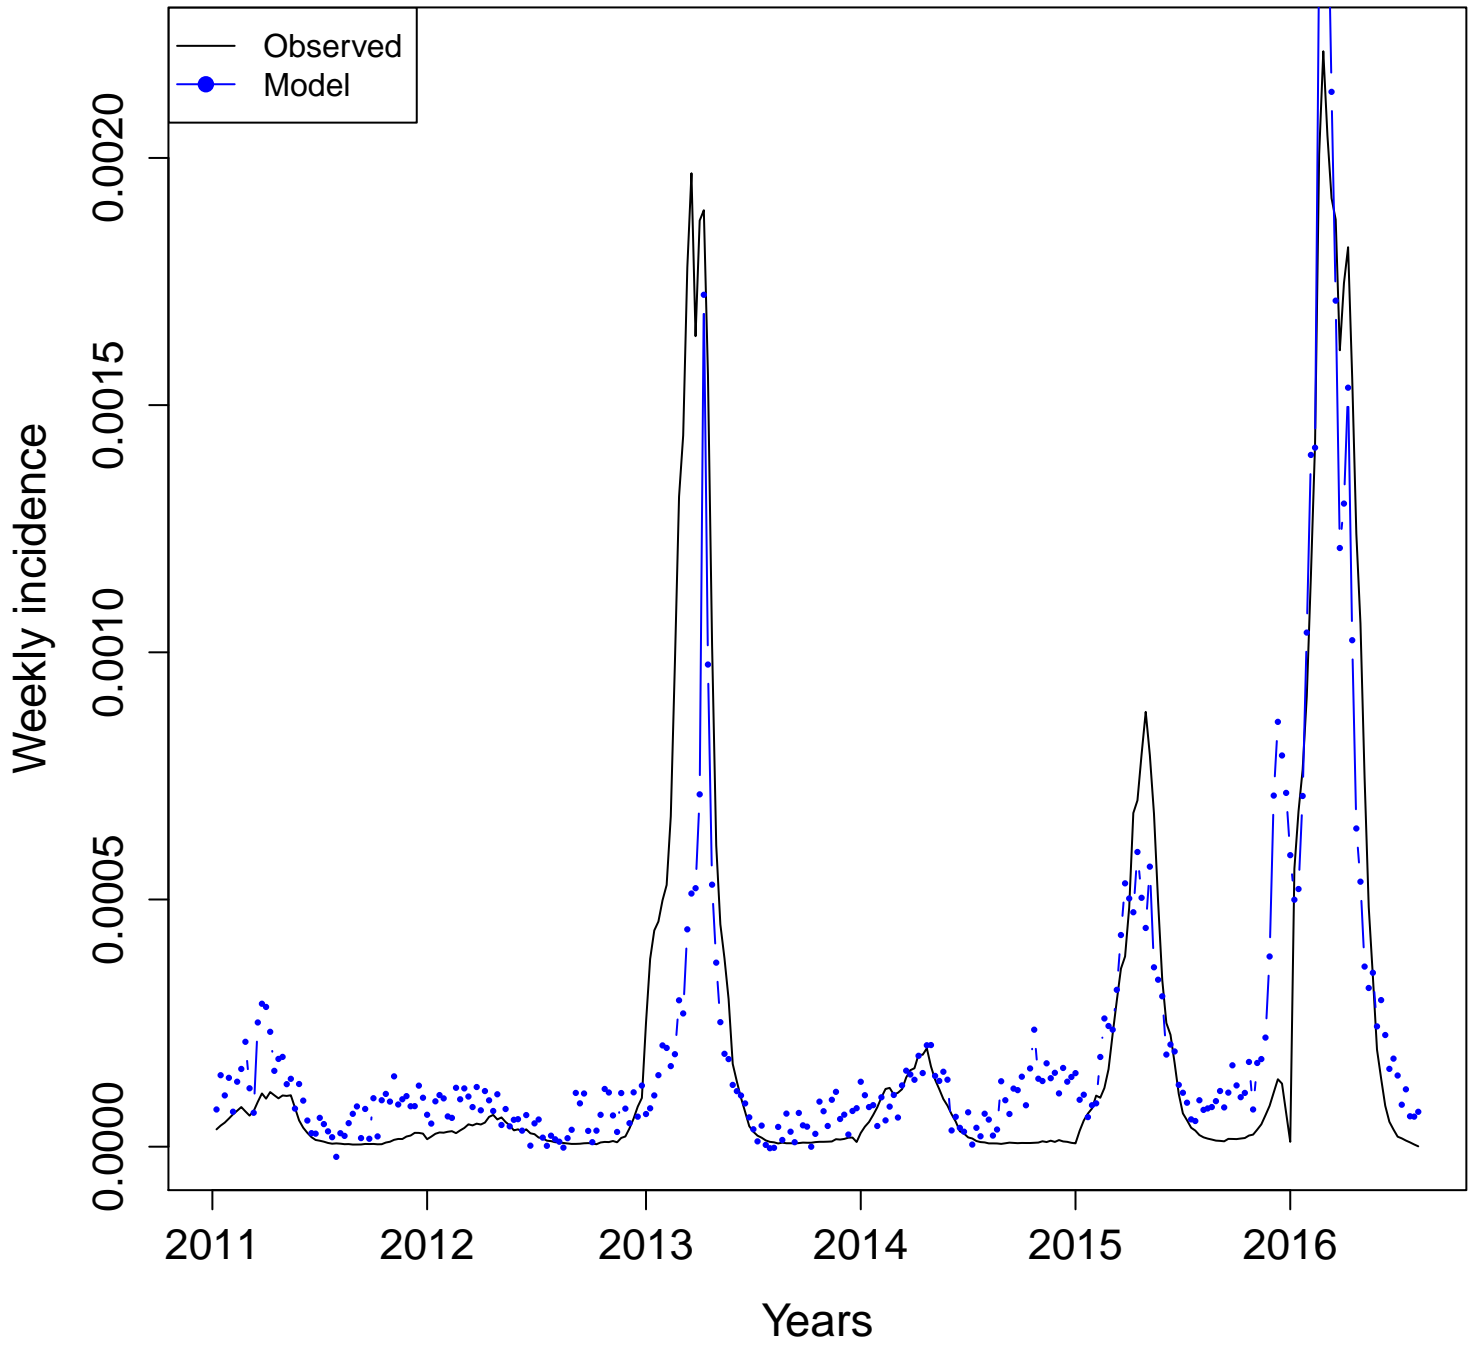

# MG- mosquitoes

Adj. R squared = -0.0034

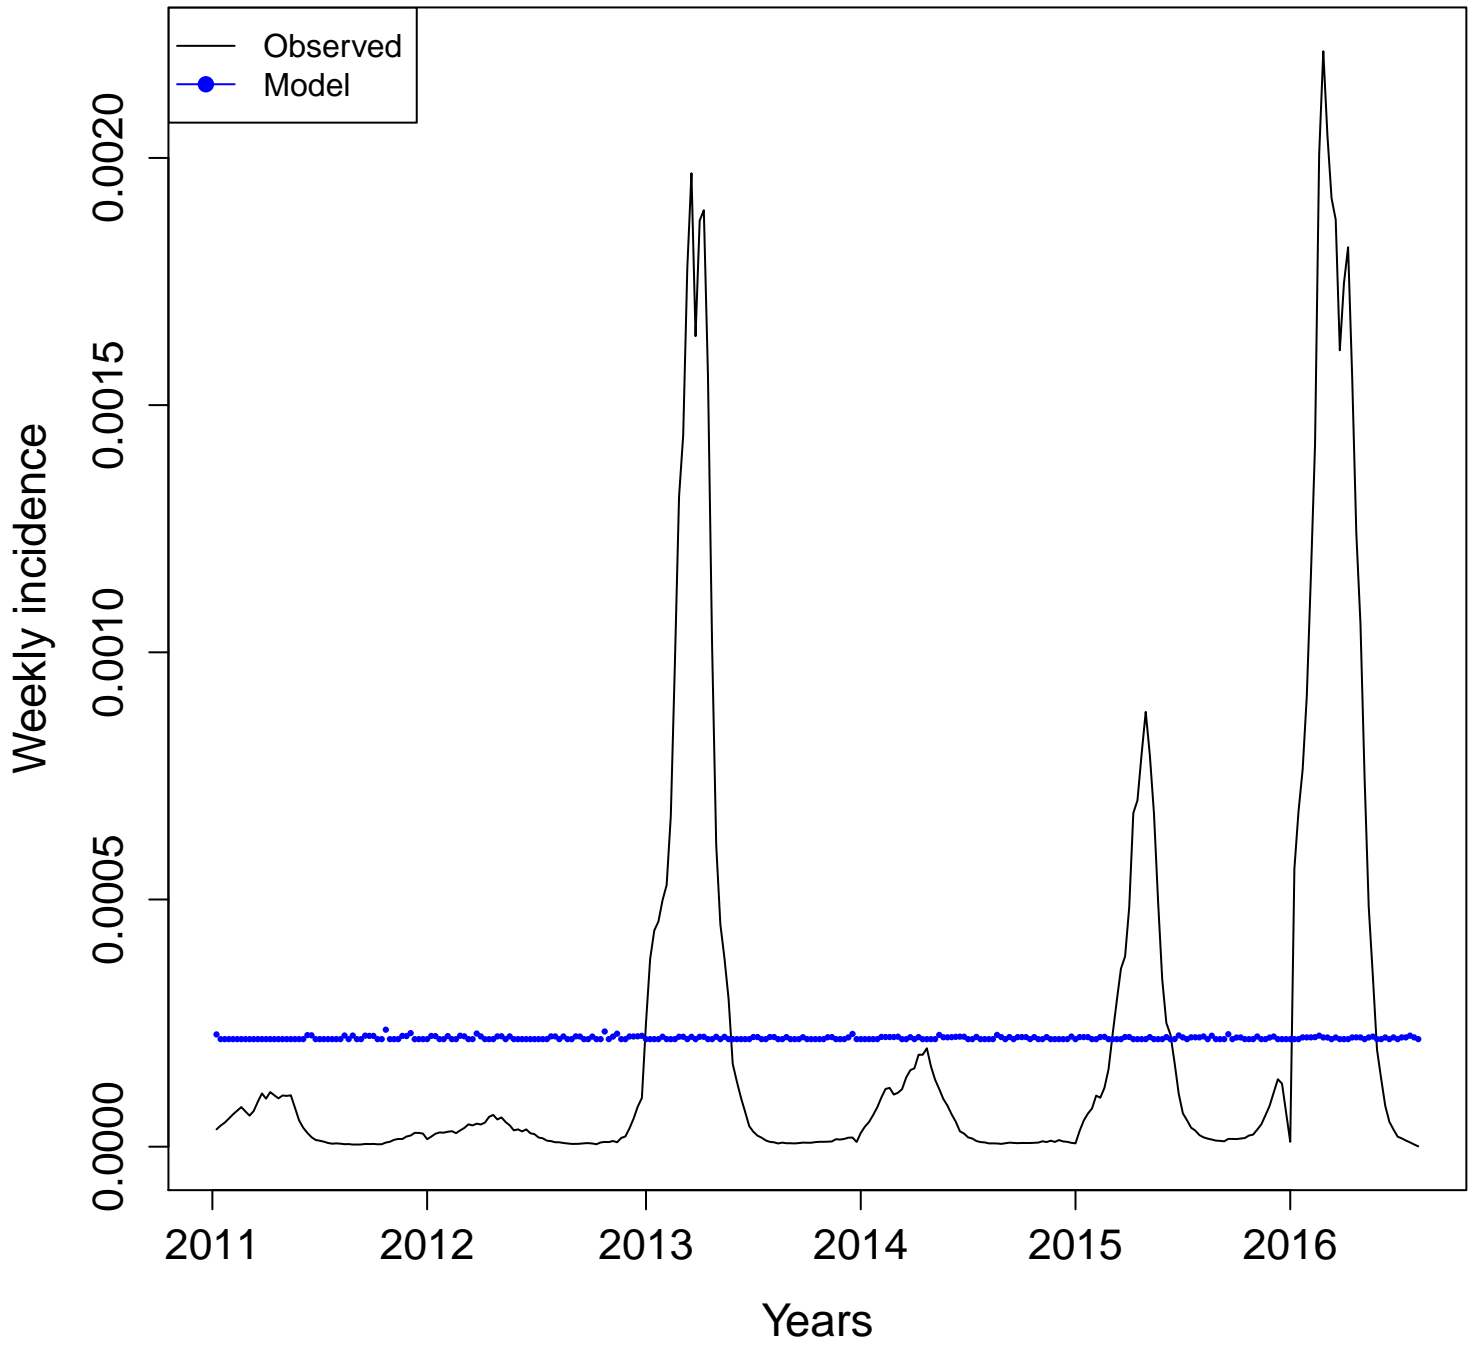

**MG- sintomas.da.dengue**  
**Adj. R squared = 0.9072**

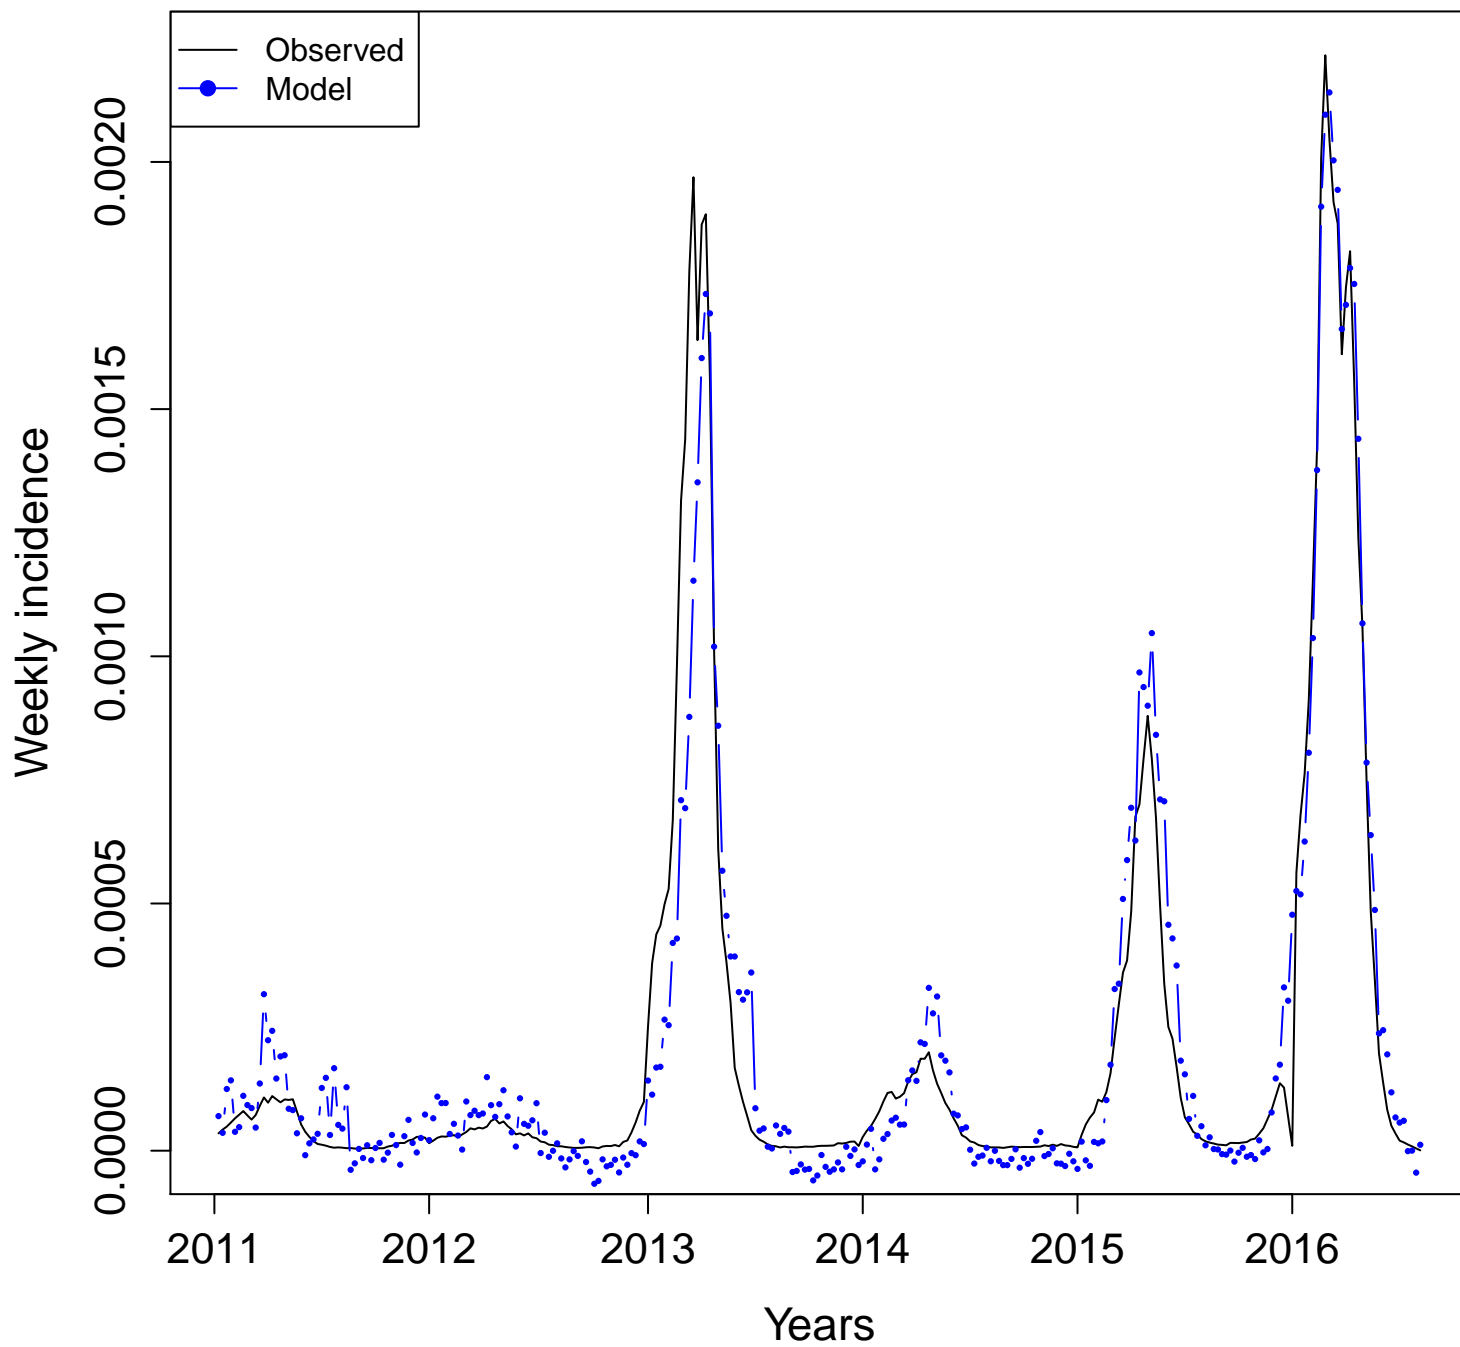

# Mato Grosso do Sul (MS)

## Dengue incidence vs. Google Health Trends (2011–2016)

### Definitions:

- **Combined terms:**
  - **All:** model with all the available terms.  $n =$  number of terms
  - **Four:** model with "dengue", "dengue sintomas", "aedes", and "mosquito".
  - **Uncorrelated:** model with non-correlated terms.  $n =$  number of uncorrelated terms
- **Individual terms:** Plots developed with one term at a time.
- Terms for all and uncorrelated models can be found in additional file 3.

**Combined terms  
Adjusted R squared**

**Mato Grosso do Sul  
(MS)**

All  
(n = 9)

BR-MS  
Adj. R squared = 0.7135

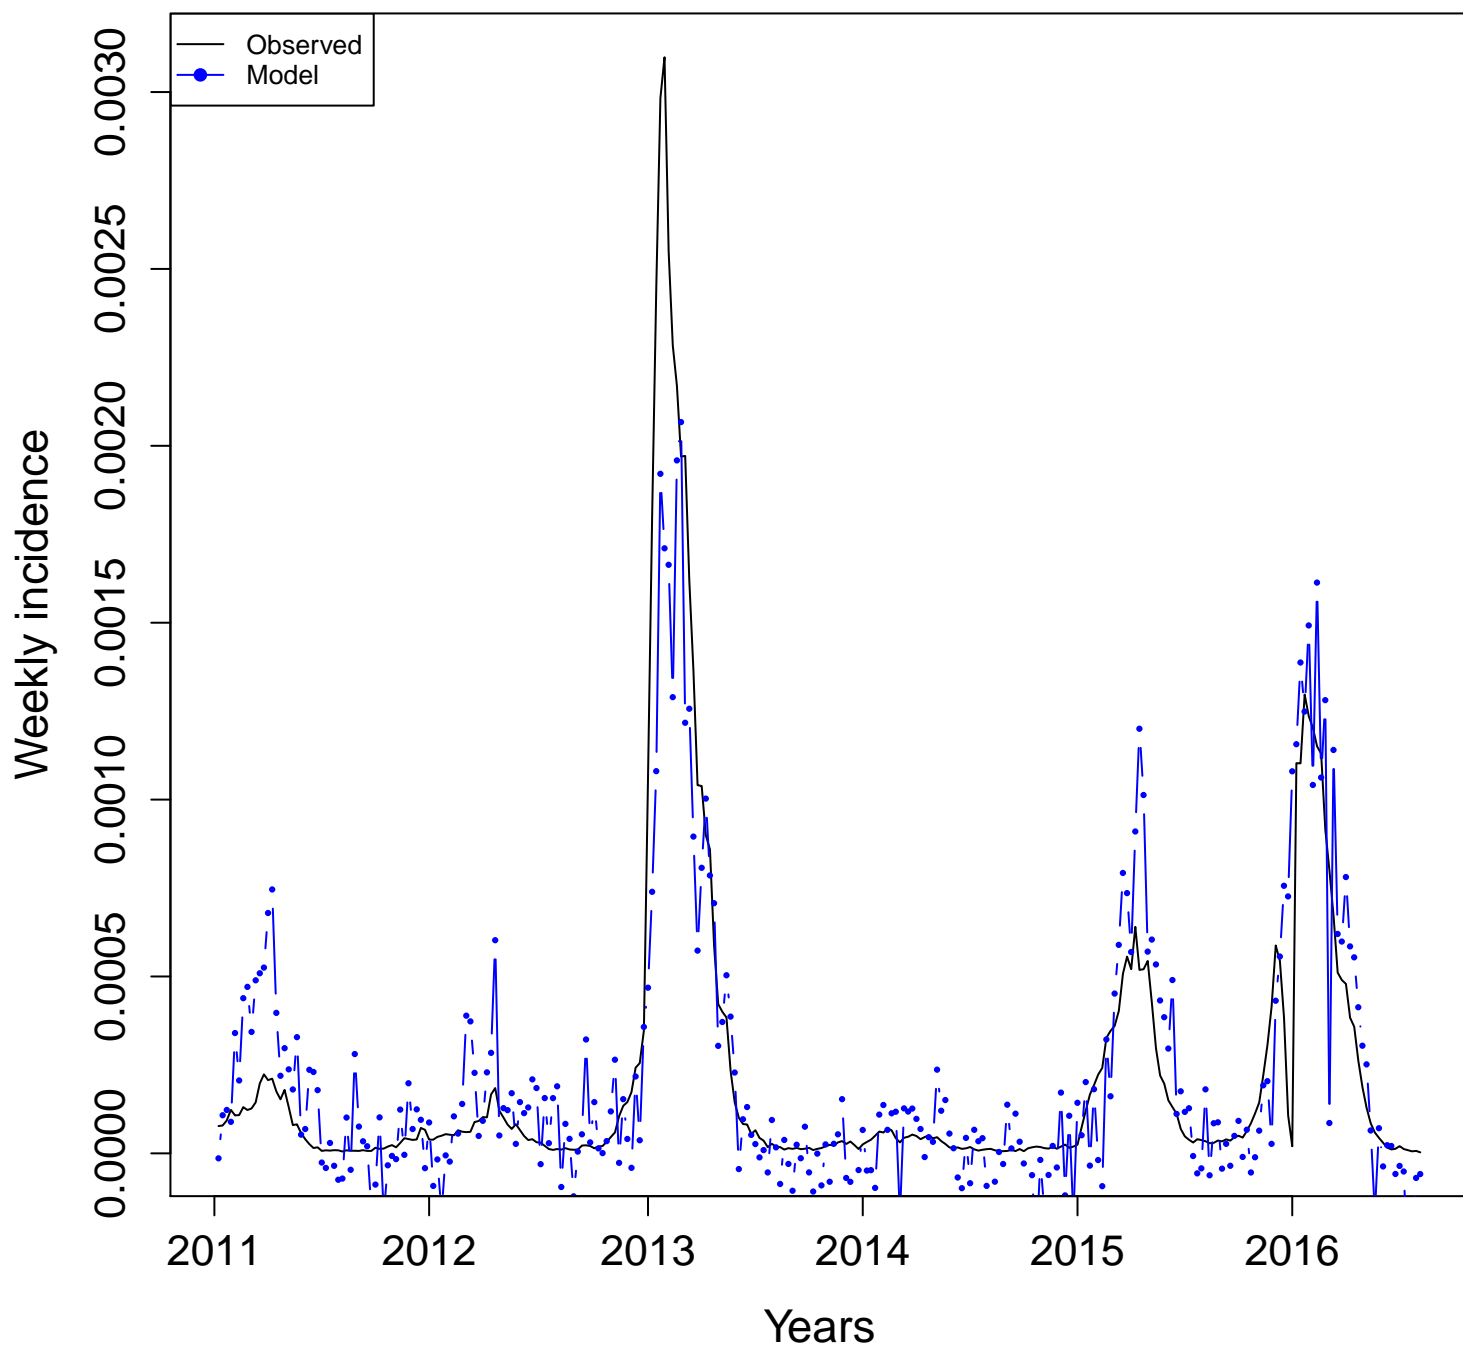



**BR-MS**  
**Adj. R squared = 0.6943**

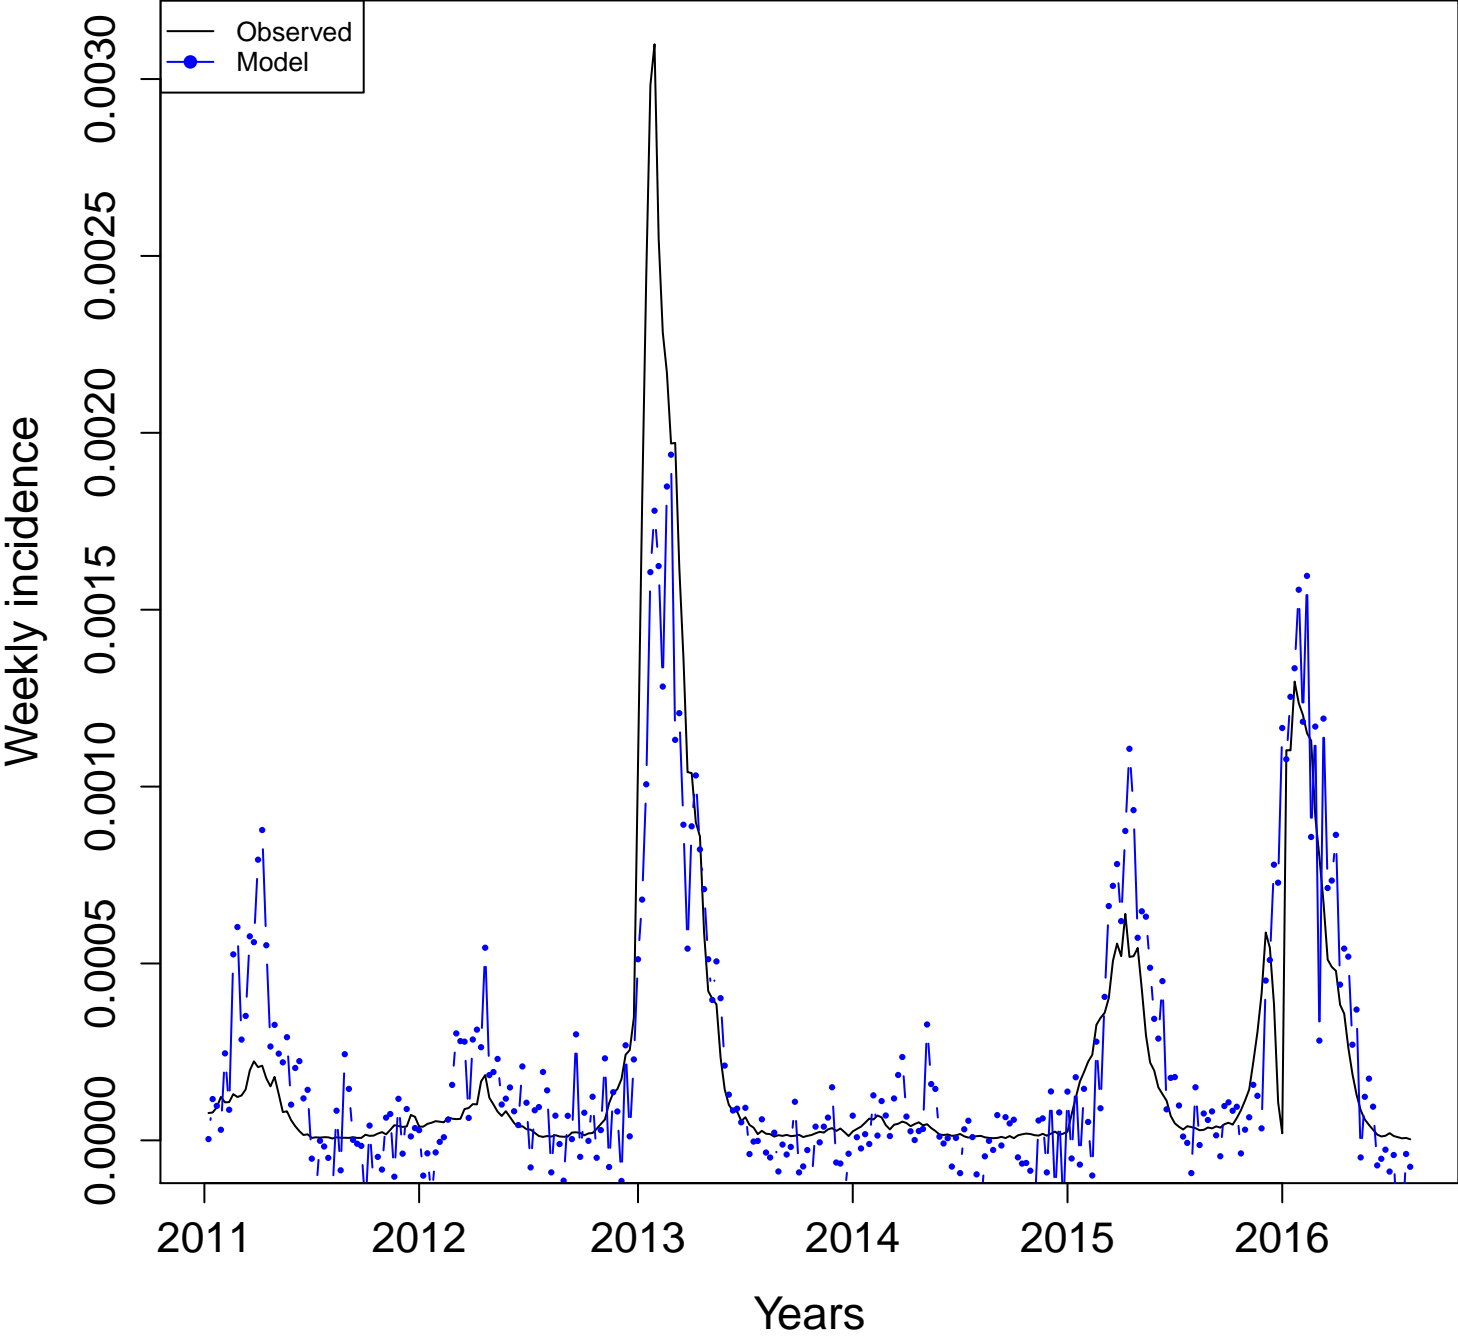

**Uncorrelated  
(n = 3)**

**BR-MS  
Adj. R squared = 0.5826**

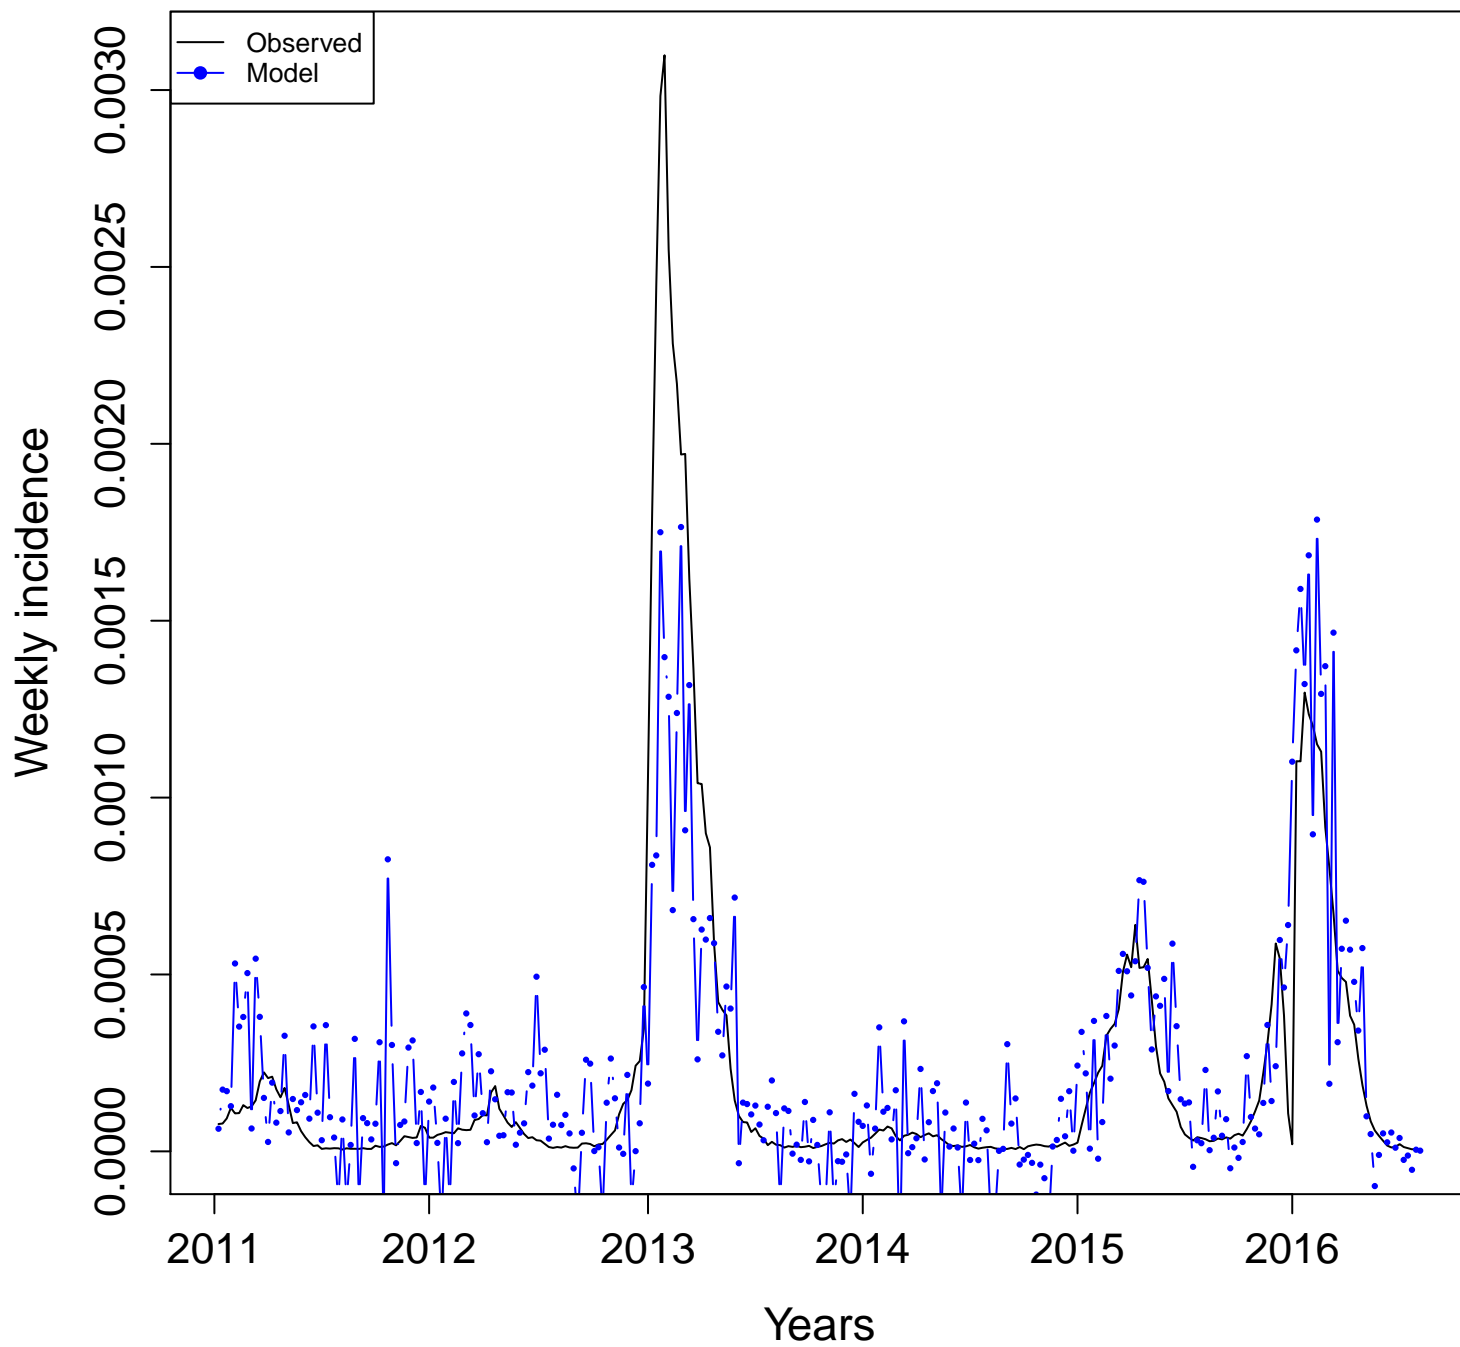

**Individual terms**  
**Adjusted R squared**

**Mato Grosso do Sul**  
**(MS)**

**MS- aedes.aegypti**  
**Adj. R squared = 0.1003**

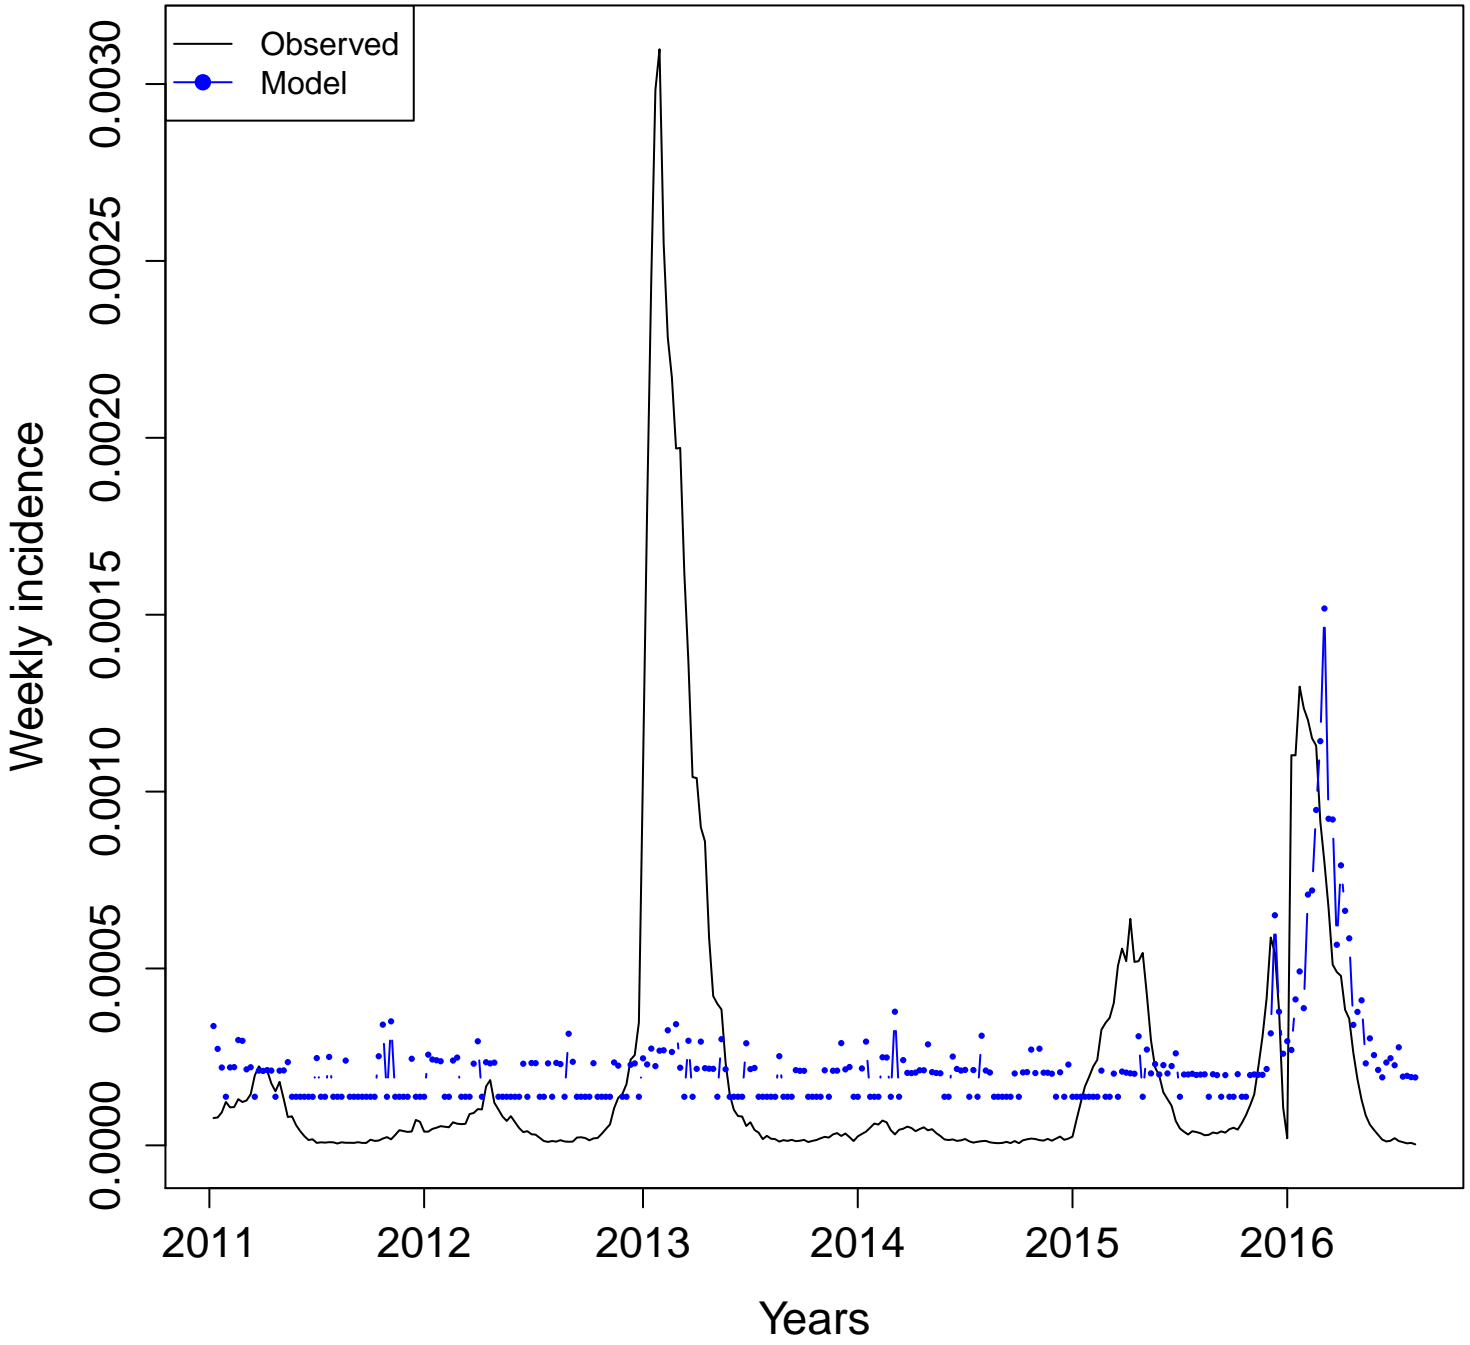

**MS- aedes**  
**Adj. R squared = 0.1035**

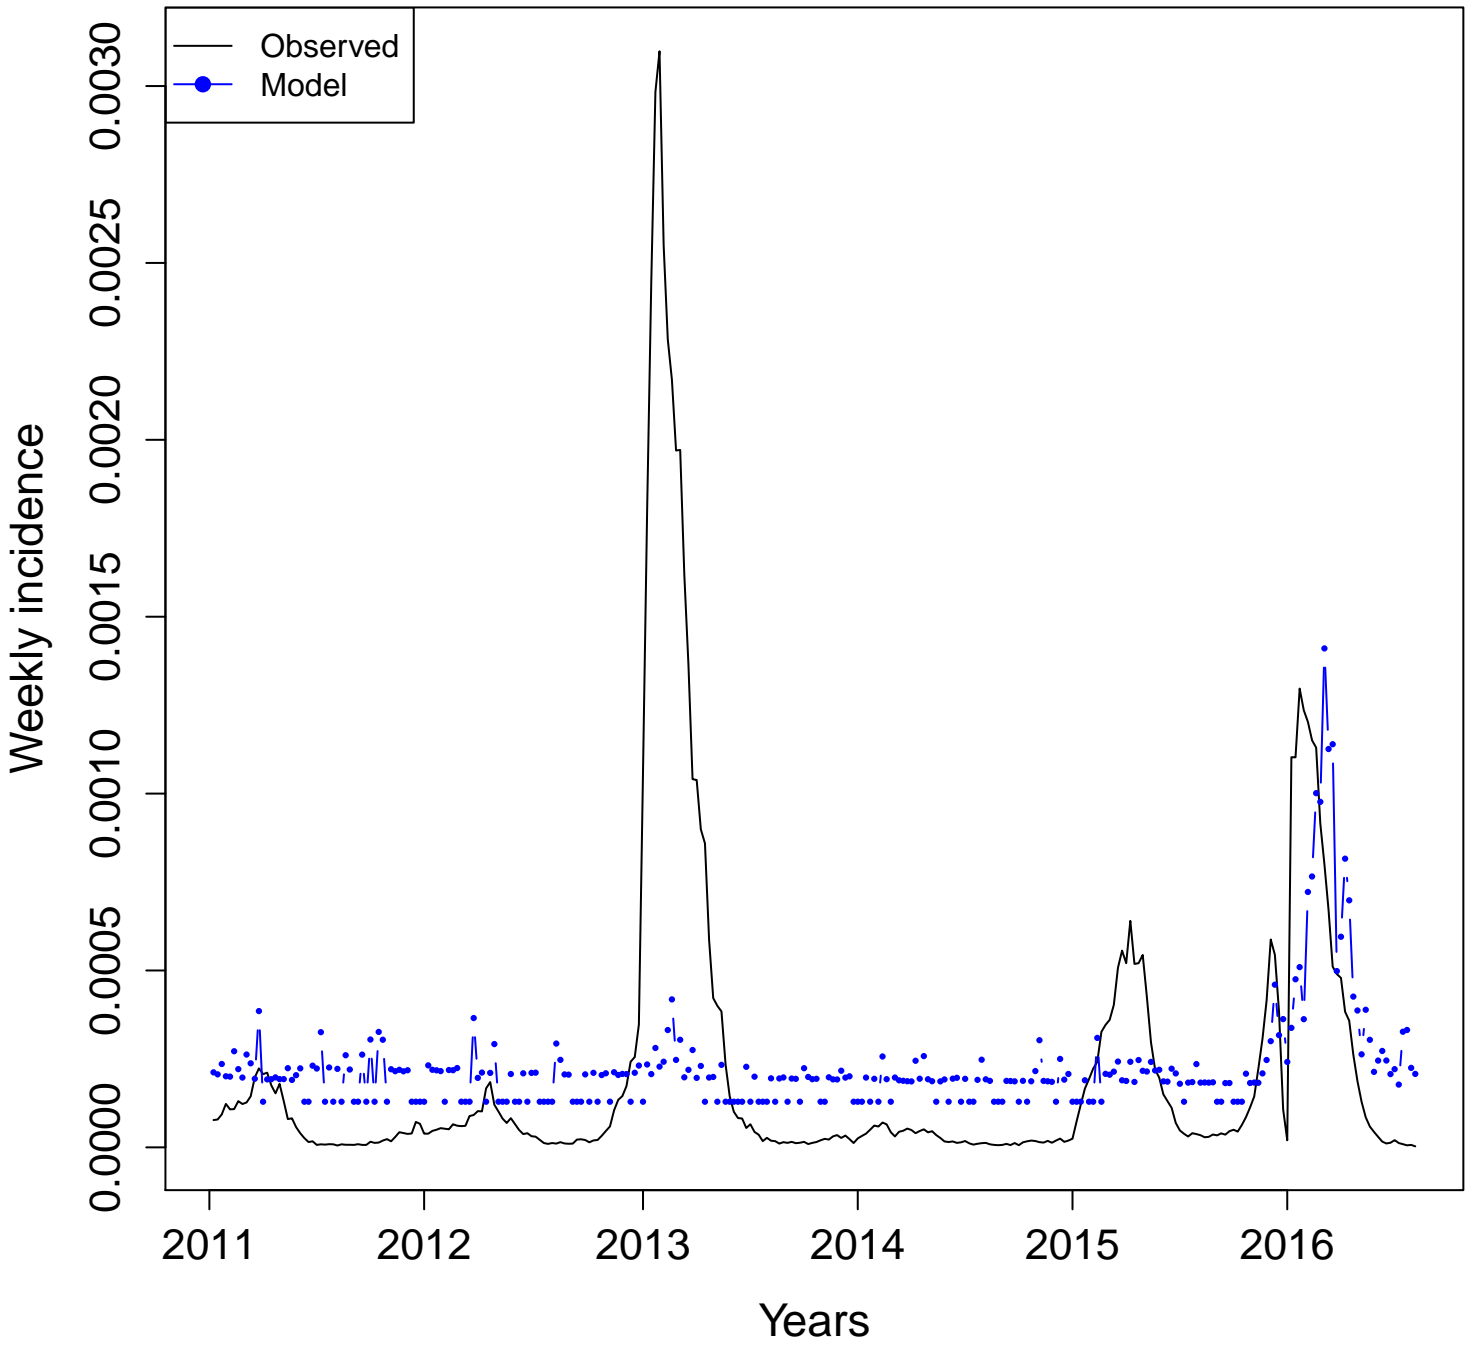

# MS- aegypti

Adj. R squared = 0.0986

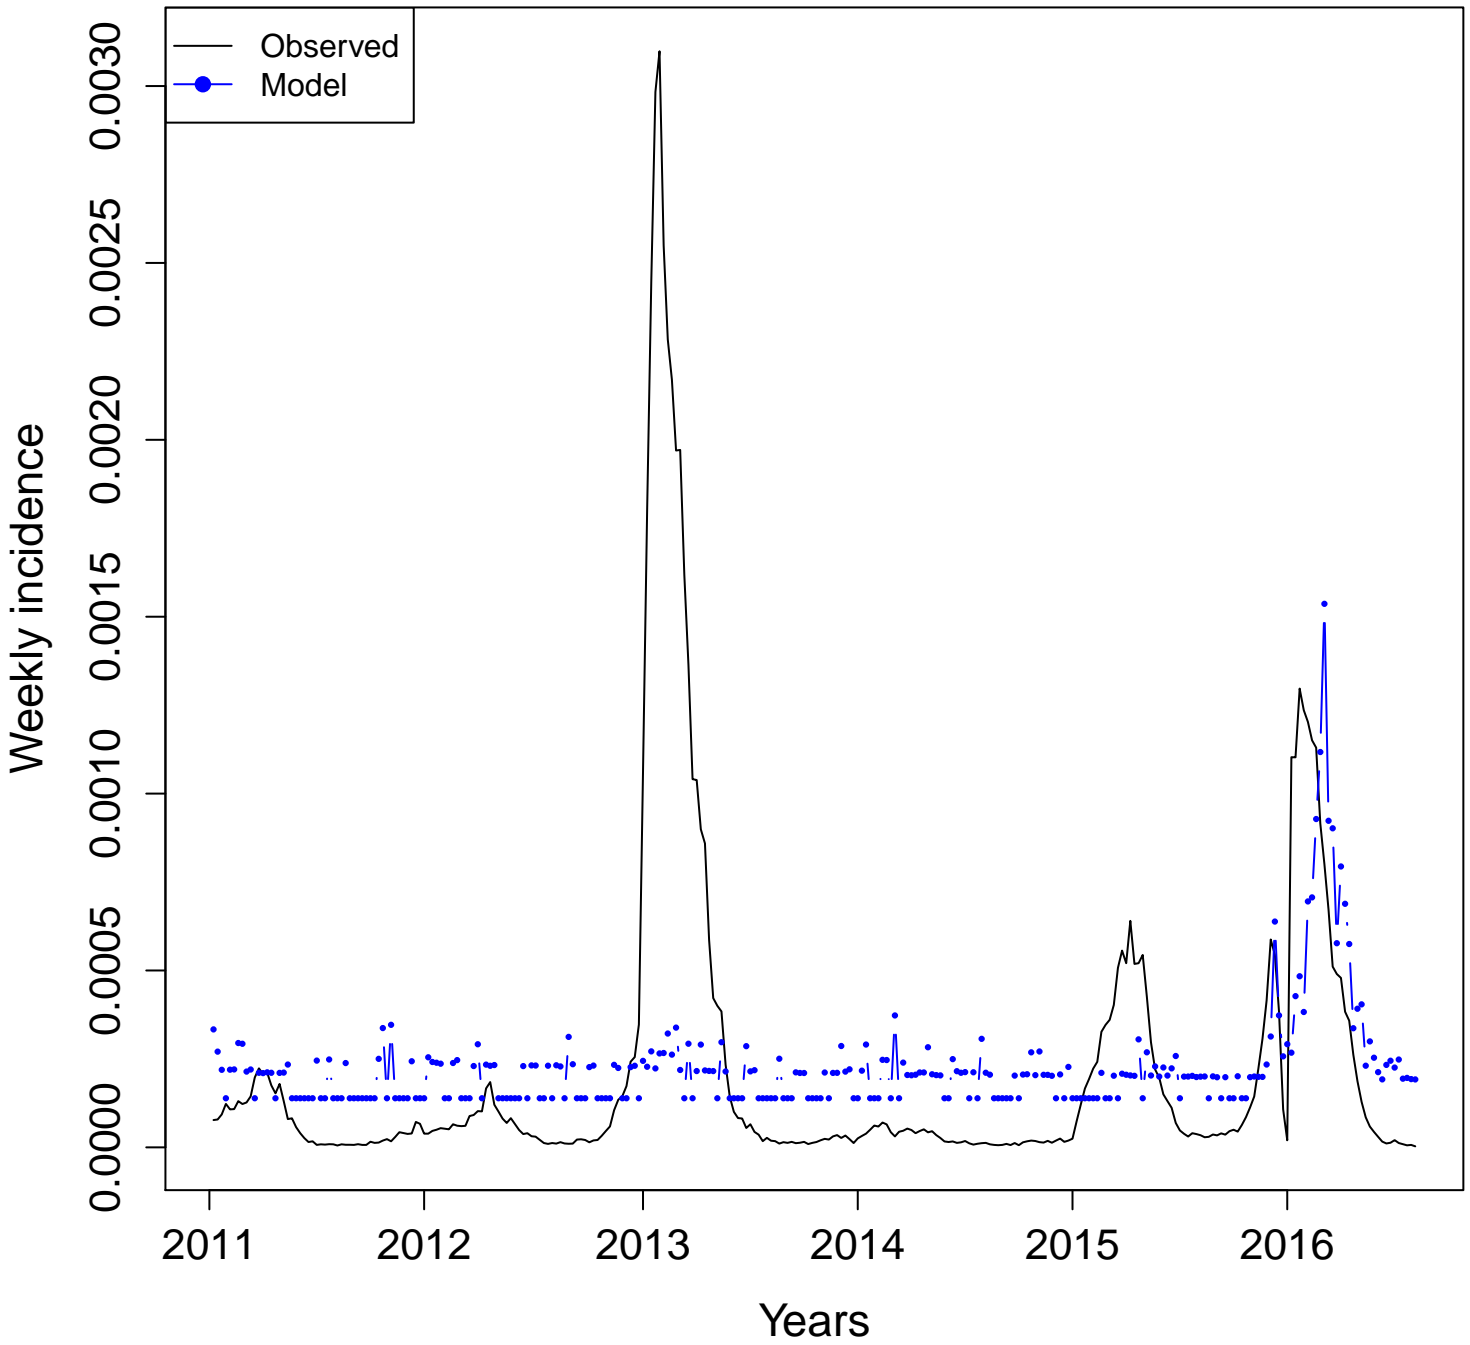

# MS- dengue

Adj. R squared = 0.5422

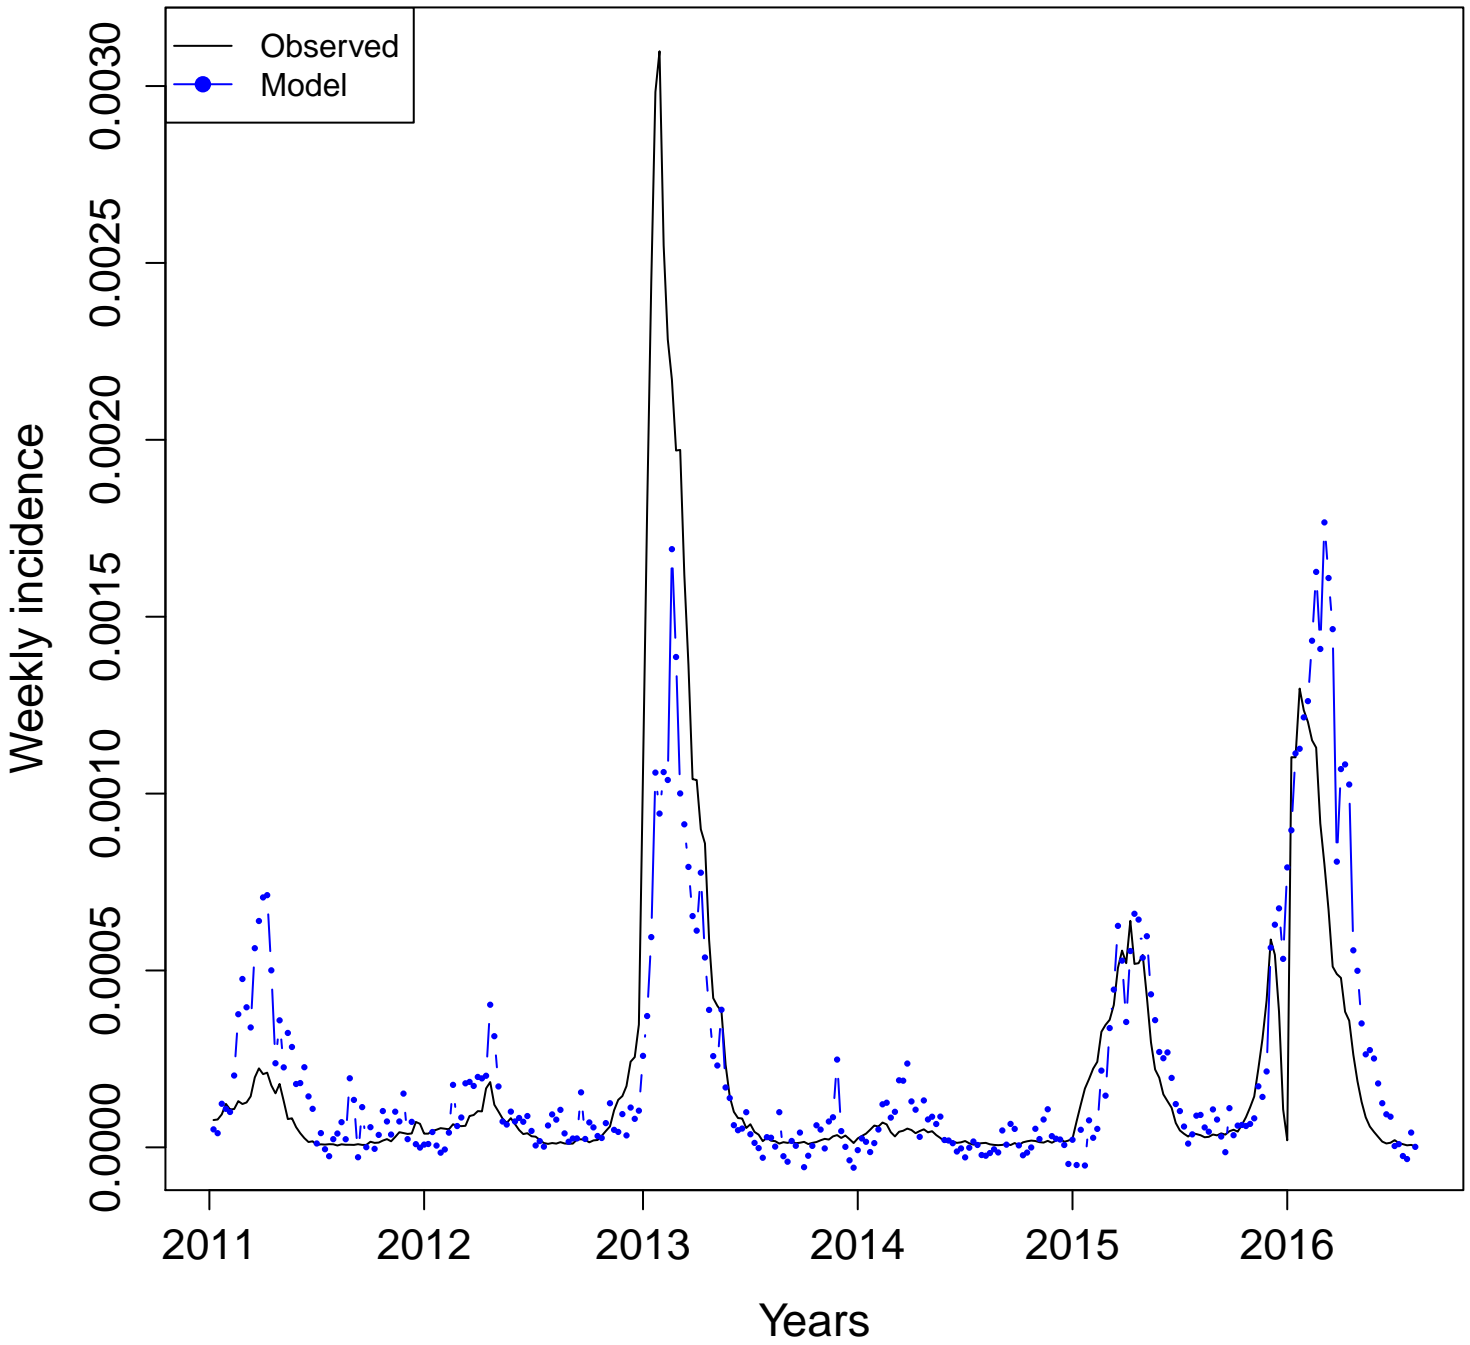

**MS- dengue.sintomas**  
**Adj. R squared = 0.5956**

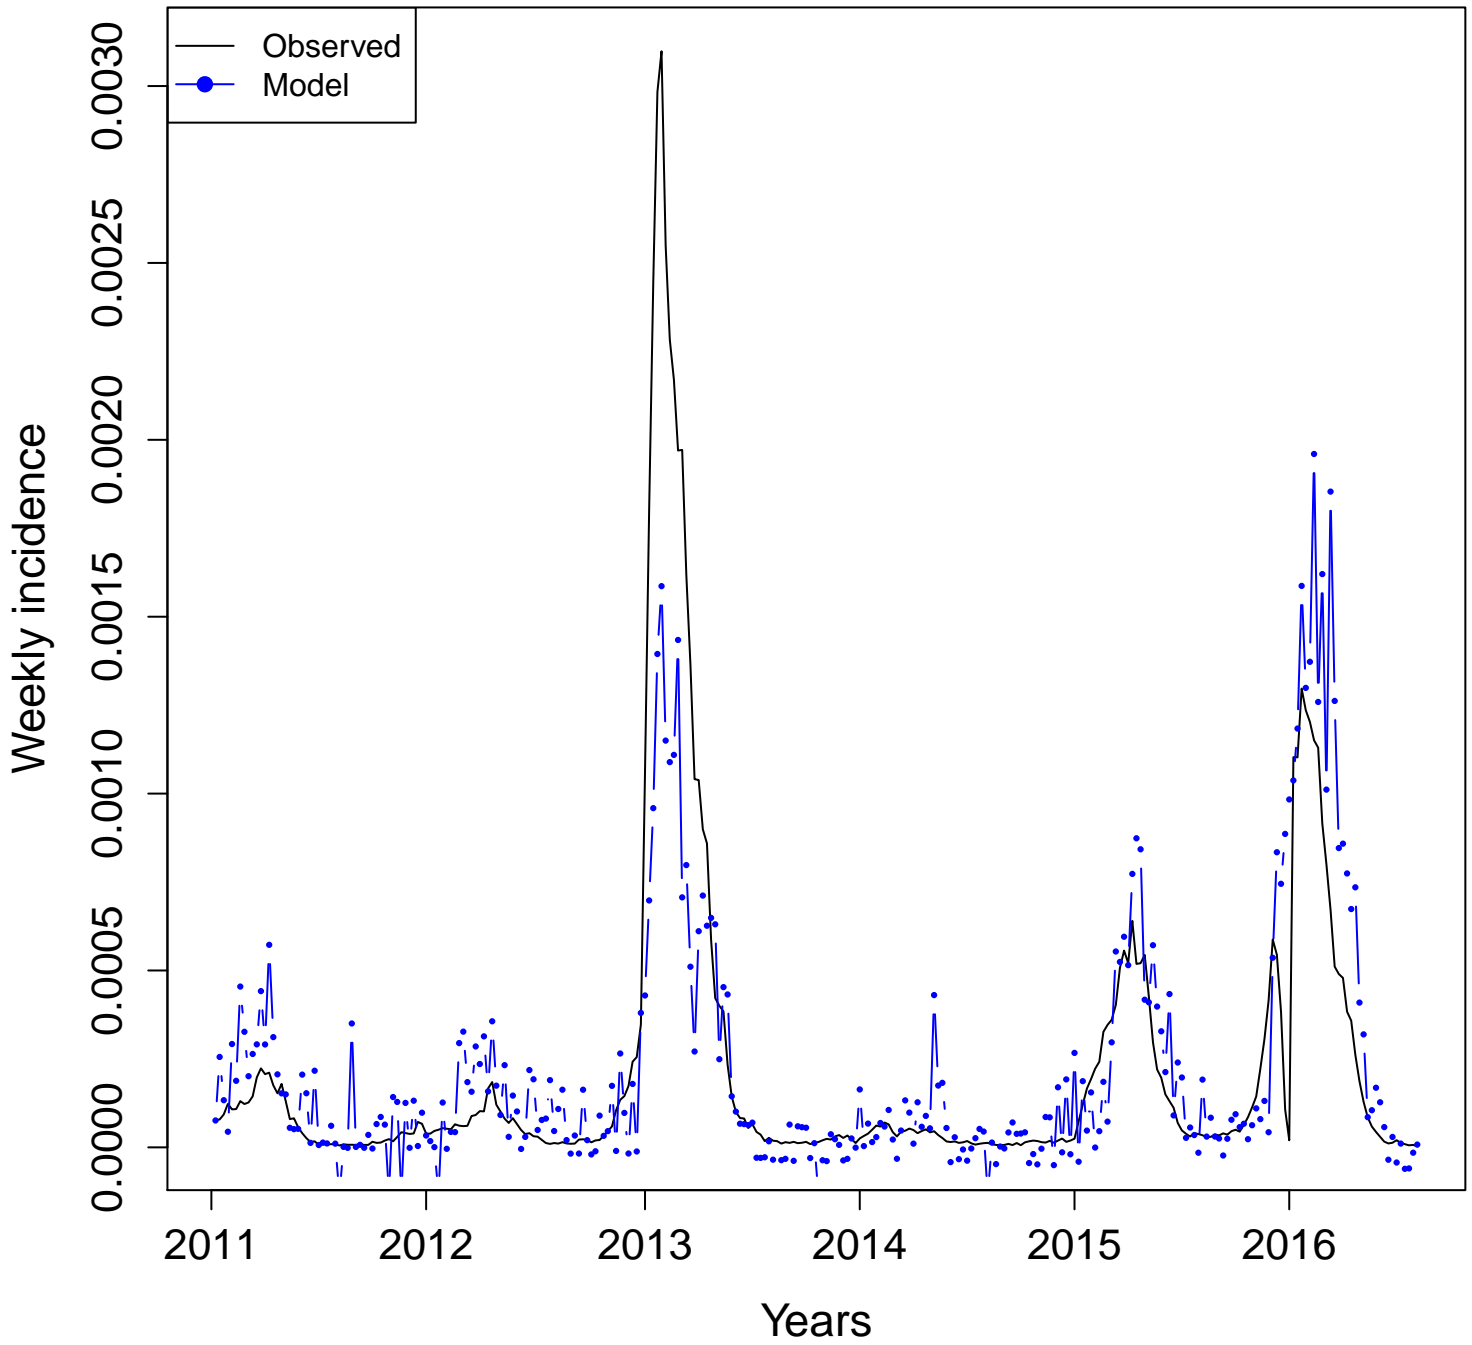



# MS- dengue.virus

Adj. R squared = 0.1113

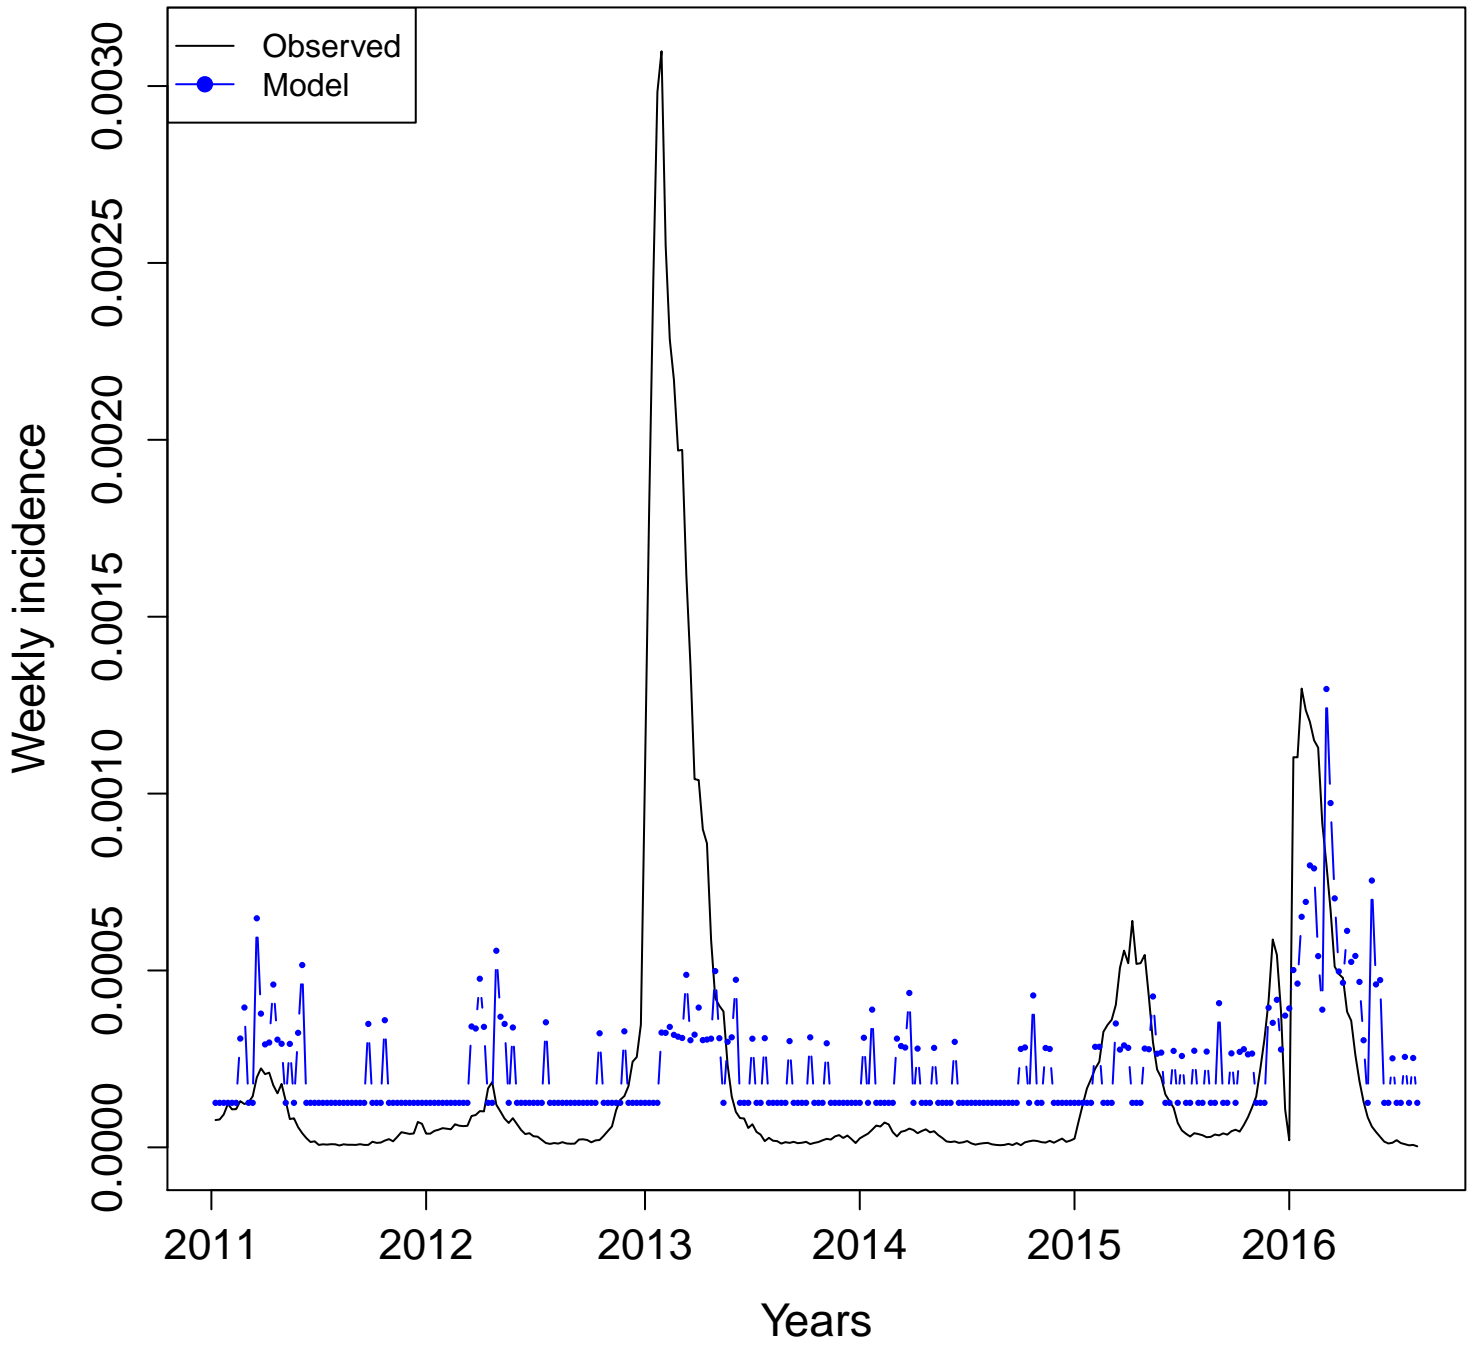

**MS- mosquito.dengue**  
**Adj. R squared = 0.3376**

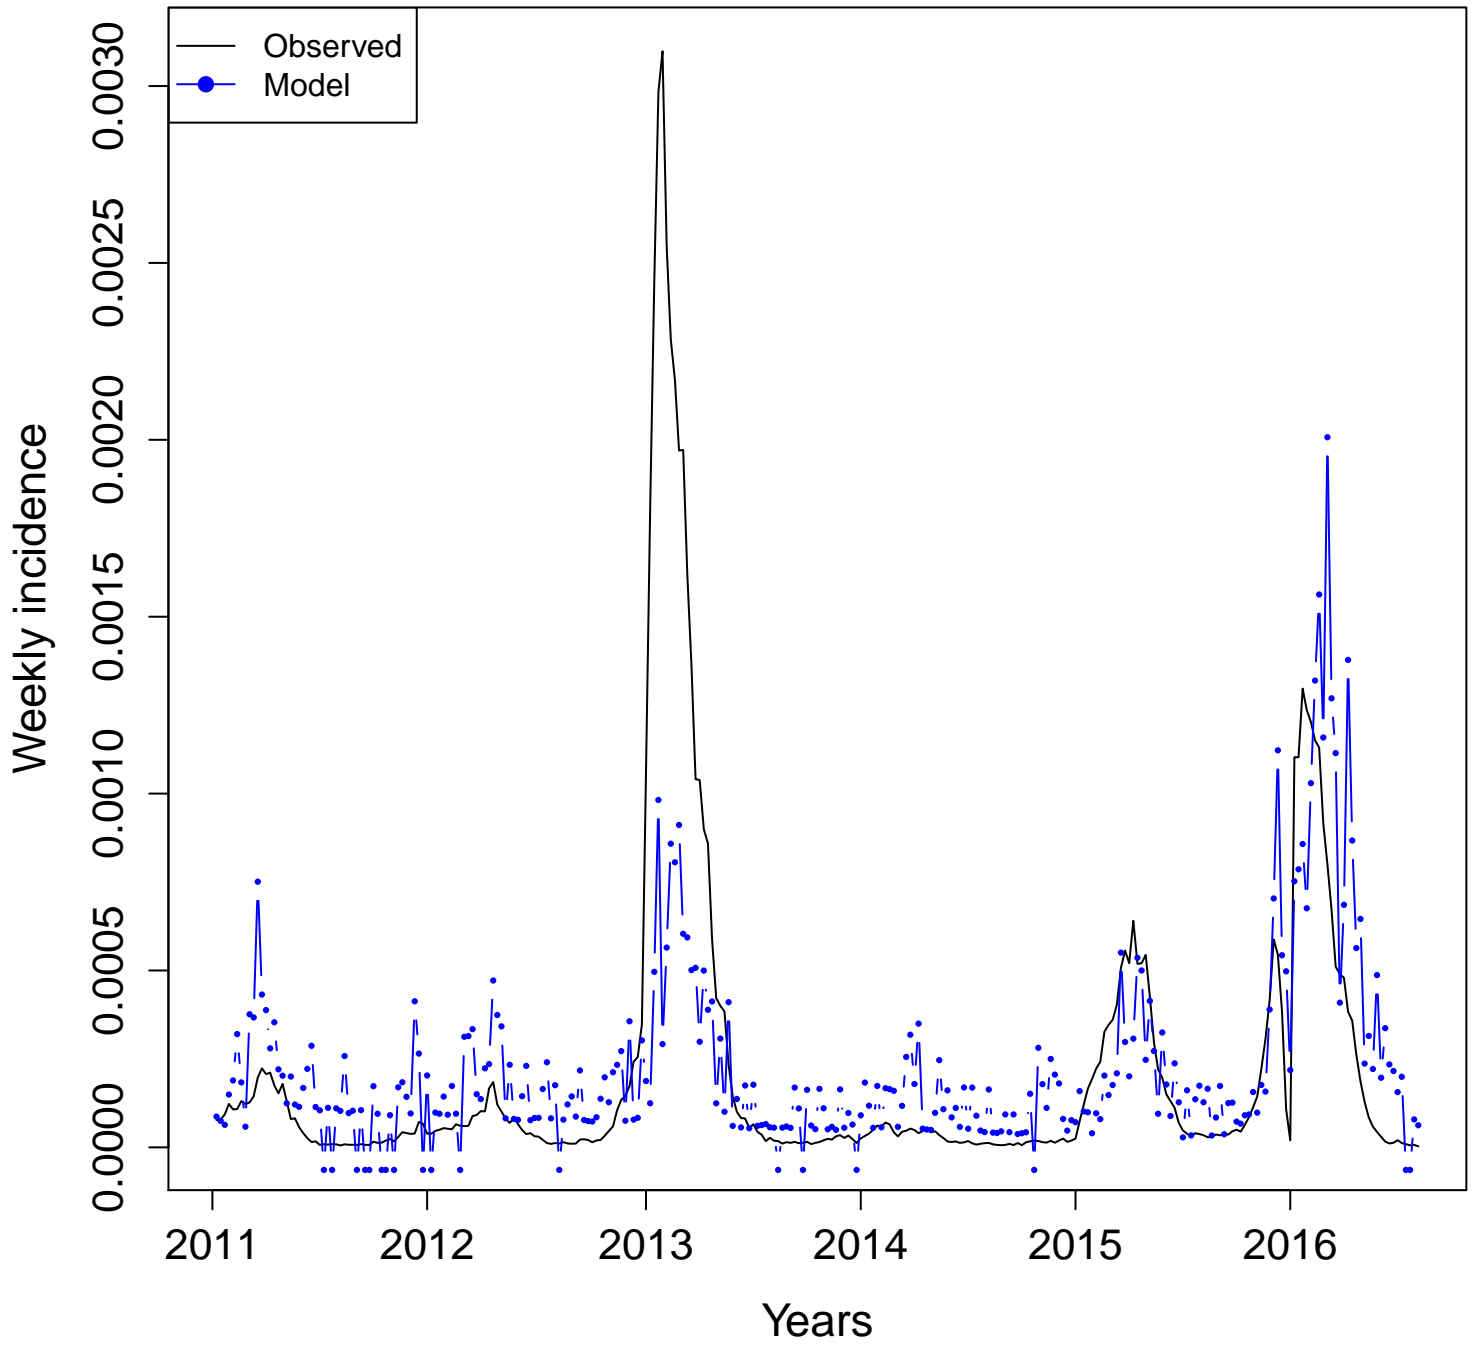

# MS- mosquito

Adj. R squared = 0.2568

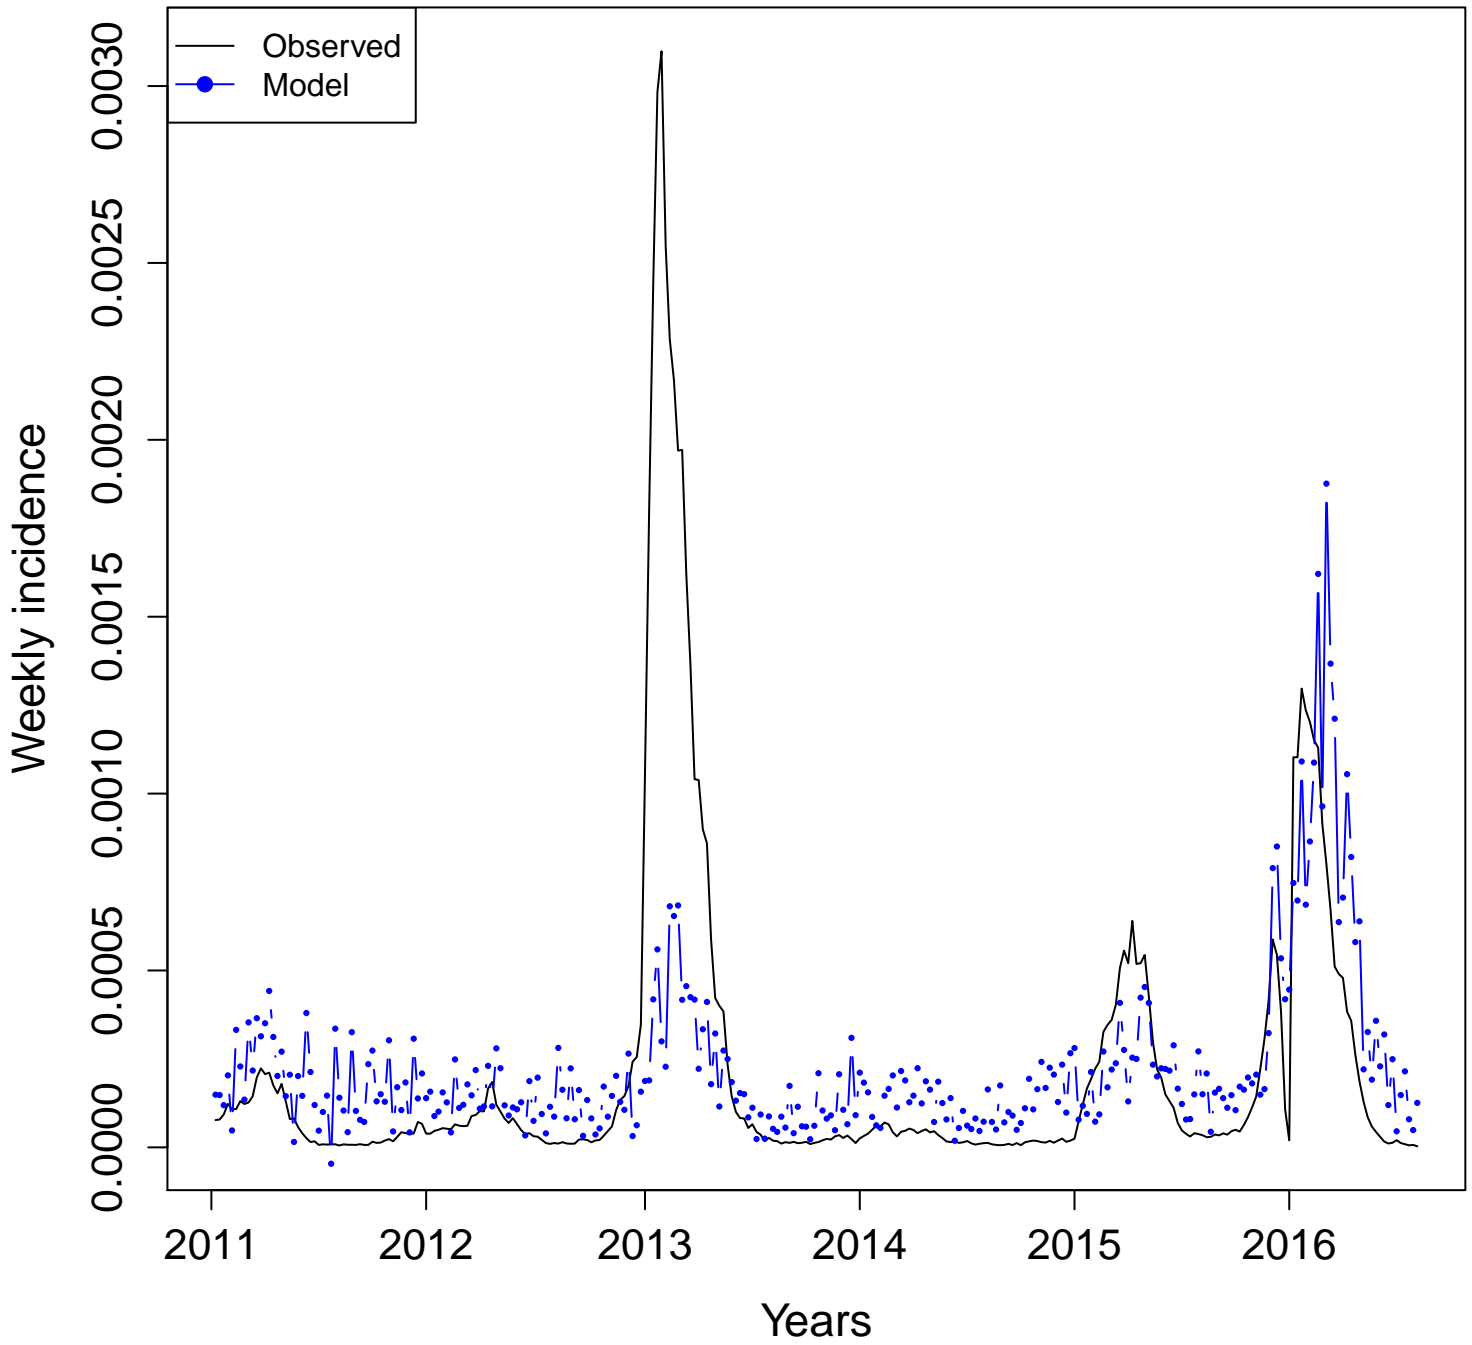

**MS- sintomas.da.dengue**  
**Adj. R squared = 0.5558**

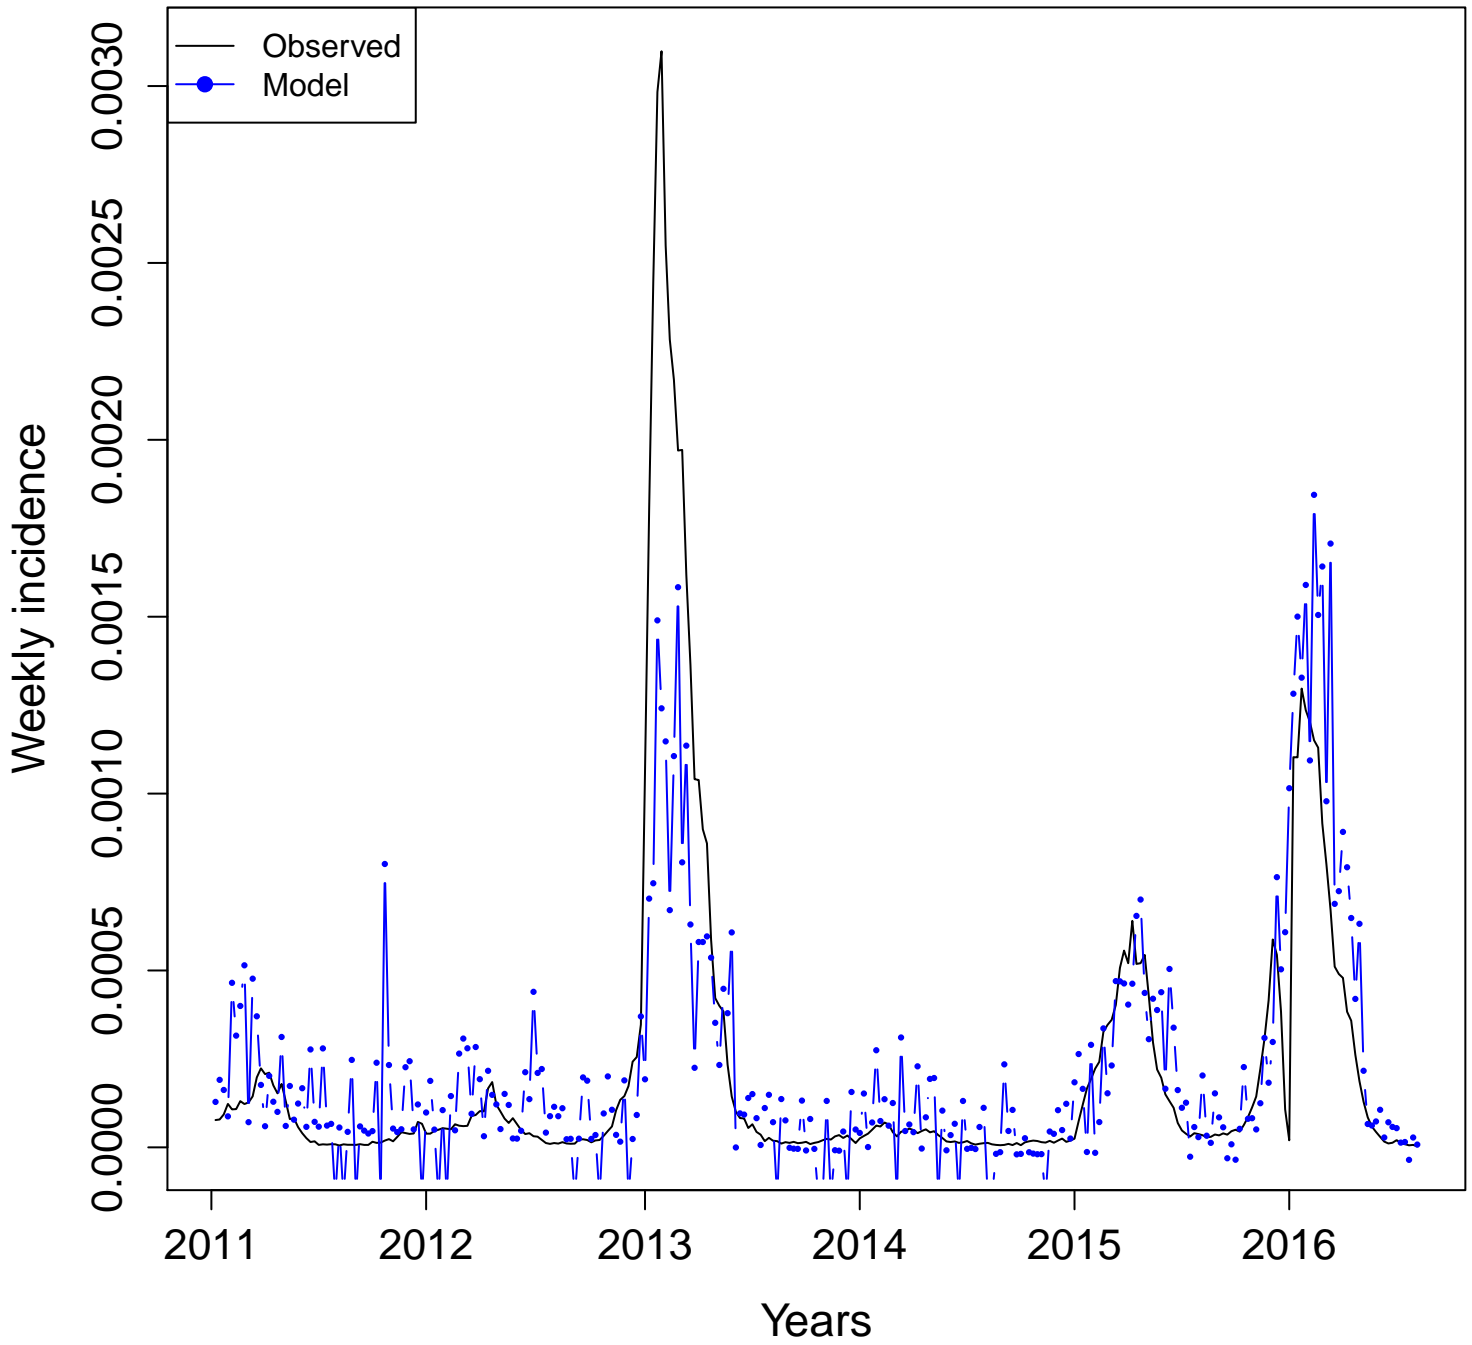

## Mato Grosso (MT)

# Dengue incidence vs. Google Health Trends (2011–2016)

### Definitions:

- **Combined terms:**
  - **All:** model with all the available terms.  $n$  = number of terms
  - **Four:** model with "dengue", "dengue sintomas", "aedes", and "mosquito".
  - **Uncorrelated:** model with non-correlated terms.  $n$  = number of uncorrelated terms
- **Individual terms:** Plots developed with one term at a time.
- Terms for all and uncorrelated models can be found in additional file 3.

**Combined terms  
Adjusted R squared**

**Mato Grosso (MT)**

All  
(n = 9)

BR-MT  
Adj. R squared = 0.5734

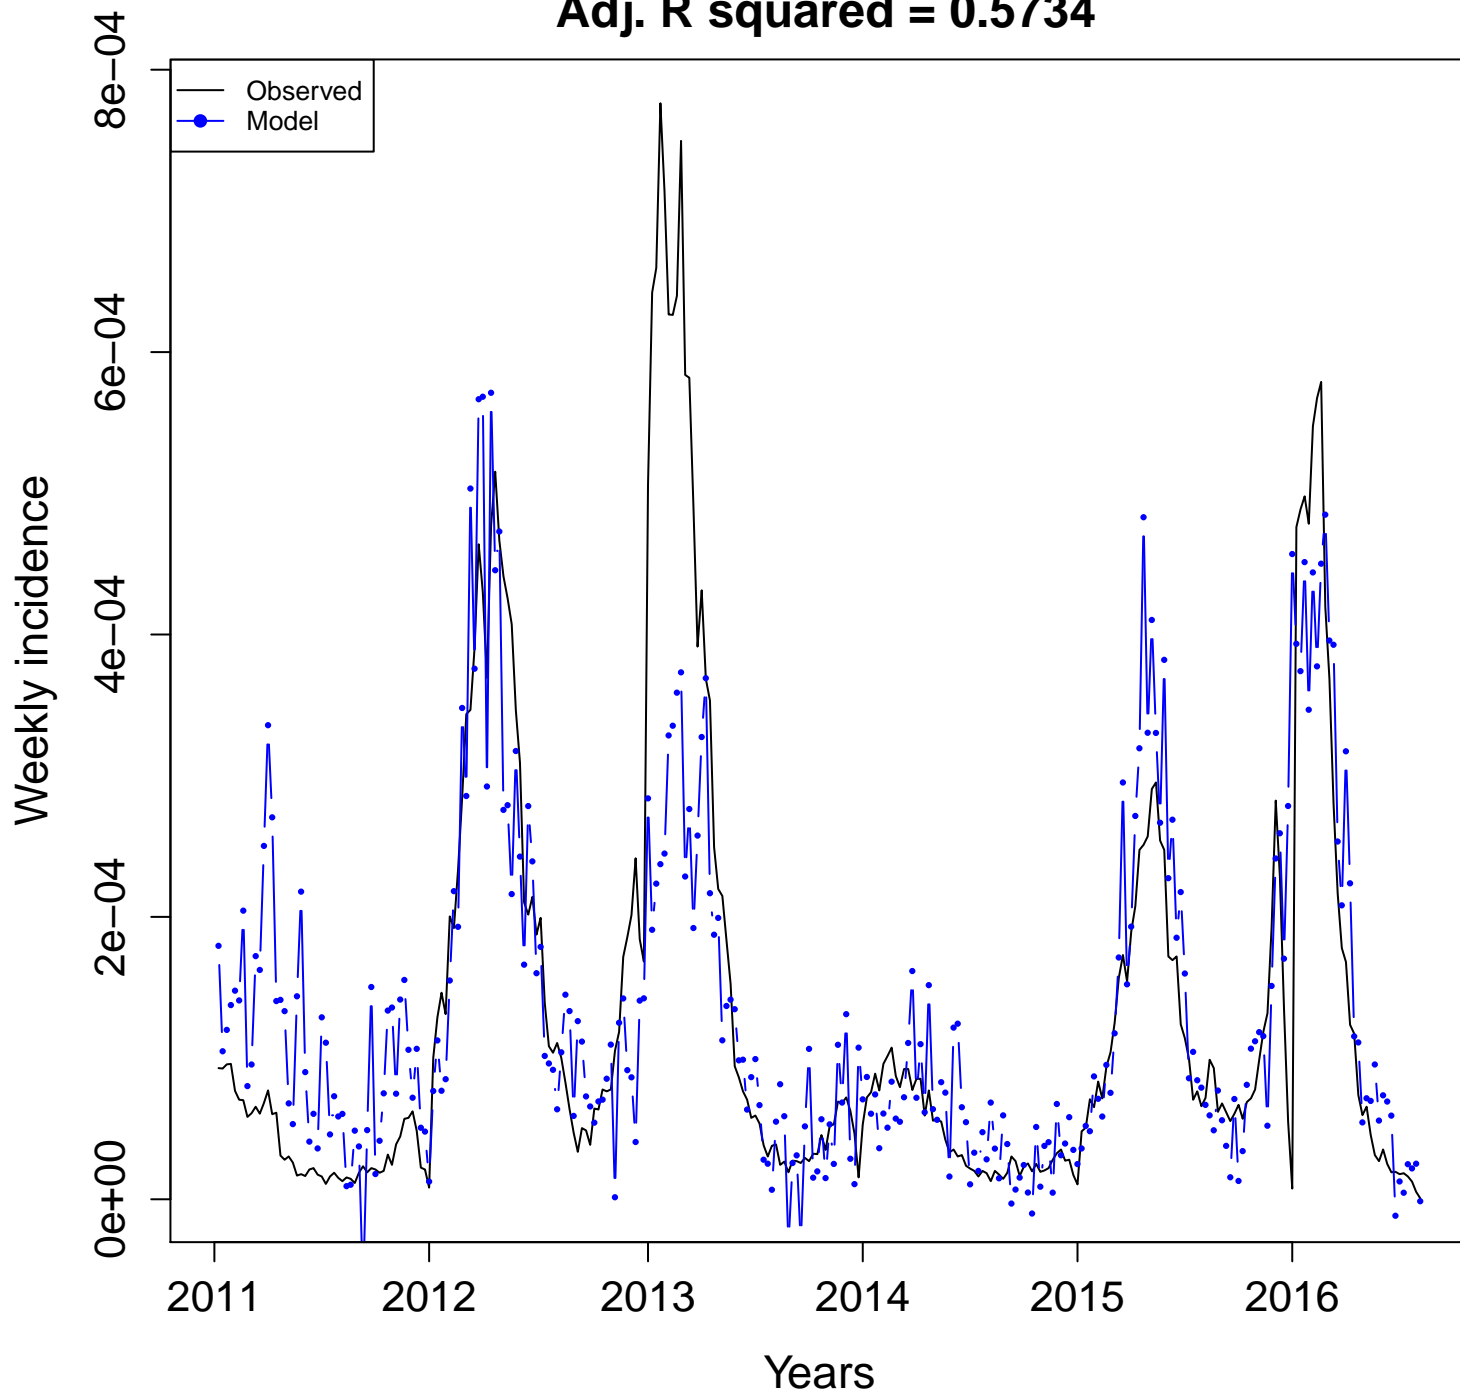

**BR-MT**  
**Adj. R squared = 0.5587**

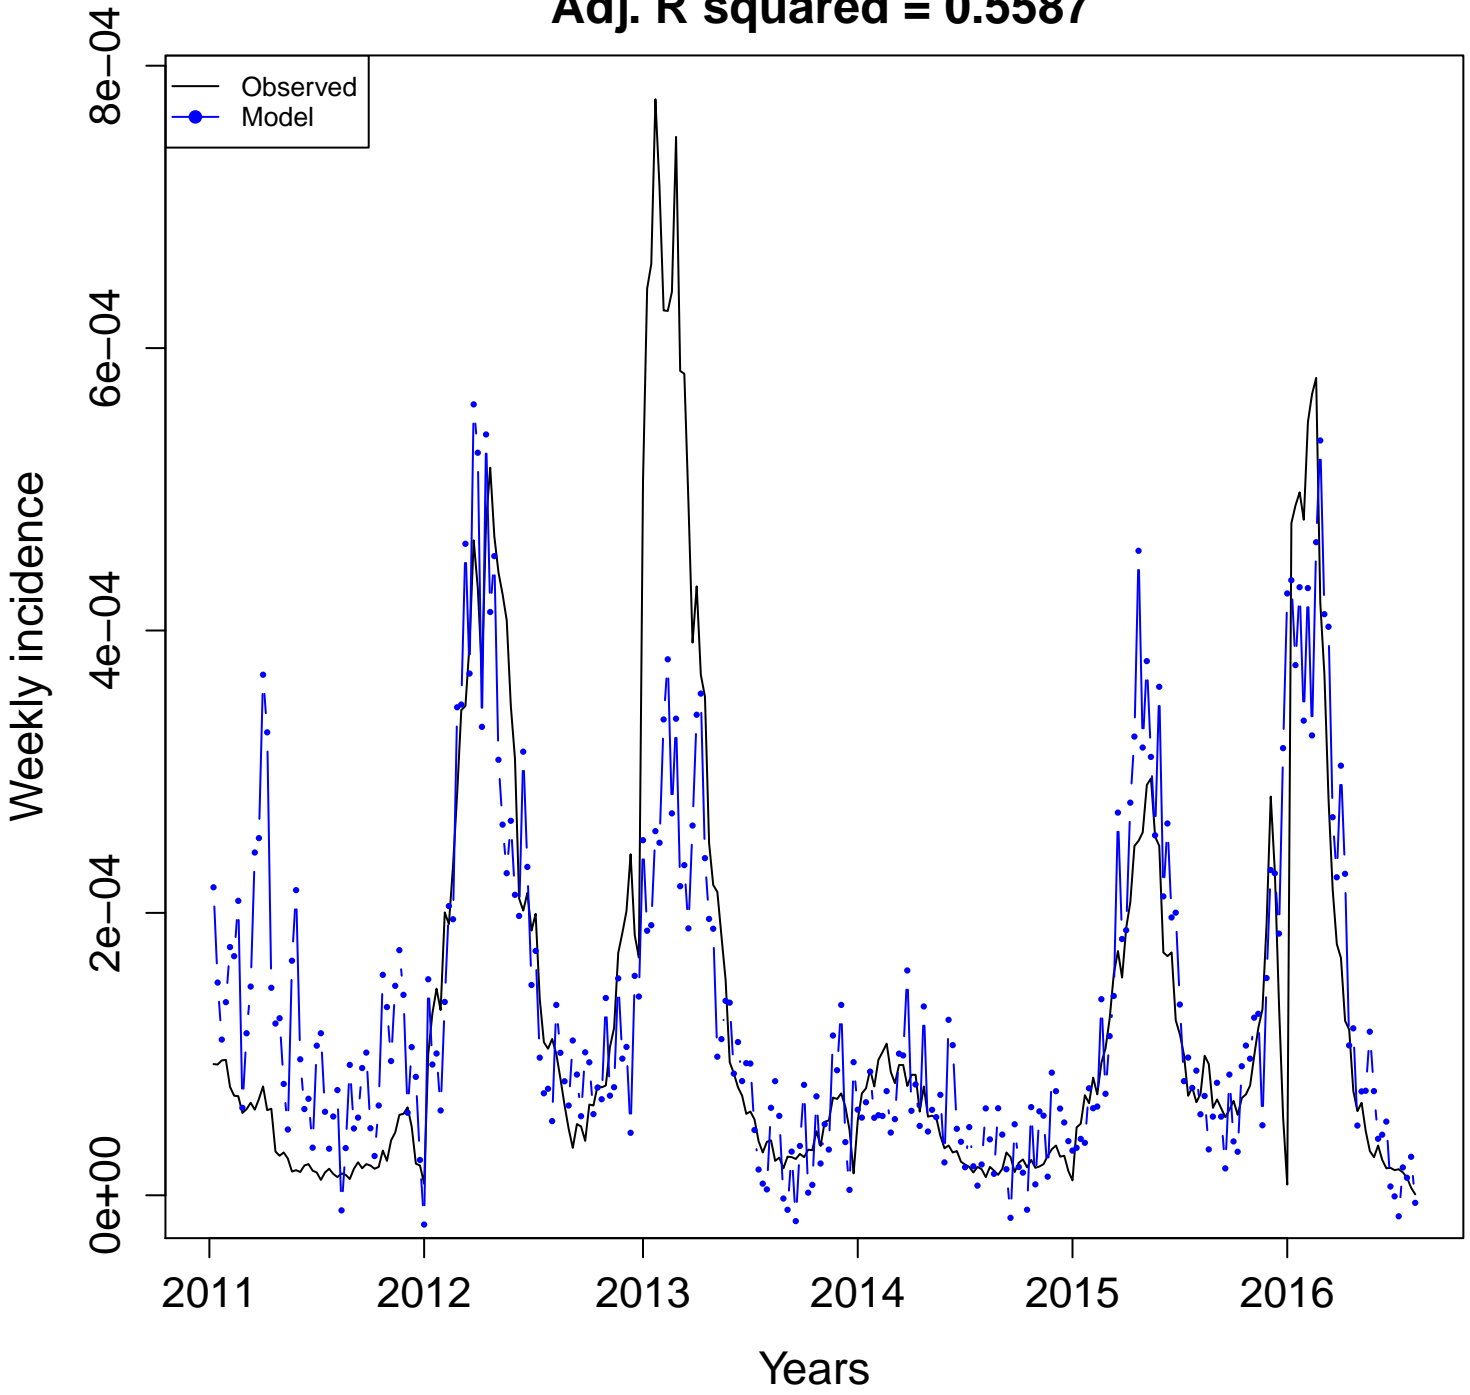



**Uncorrelated  
(n = 3)**

**BR-MT  
Adj. R squared = 0.4535**

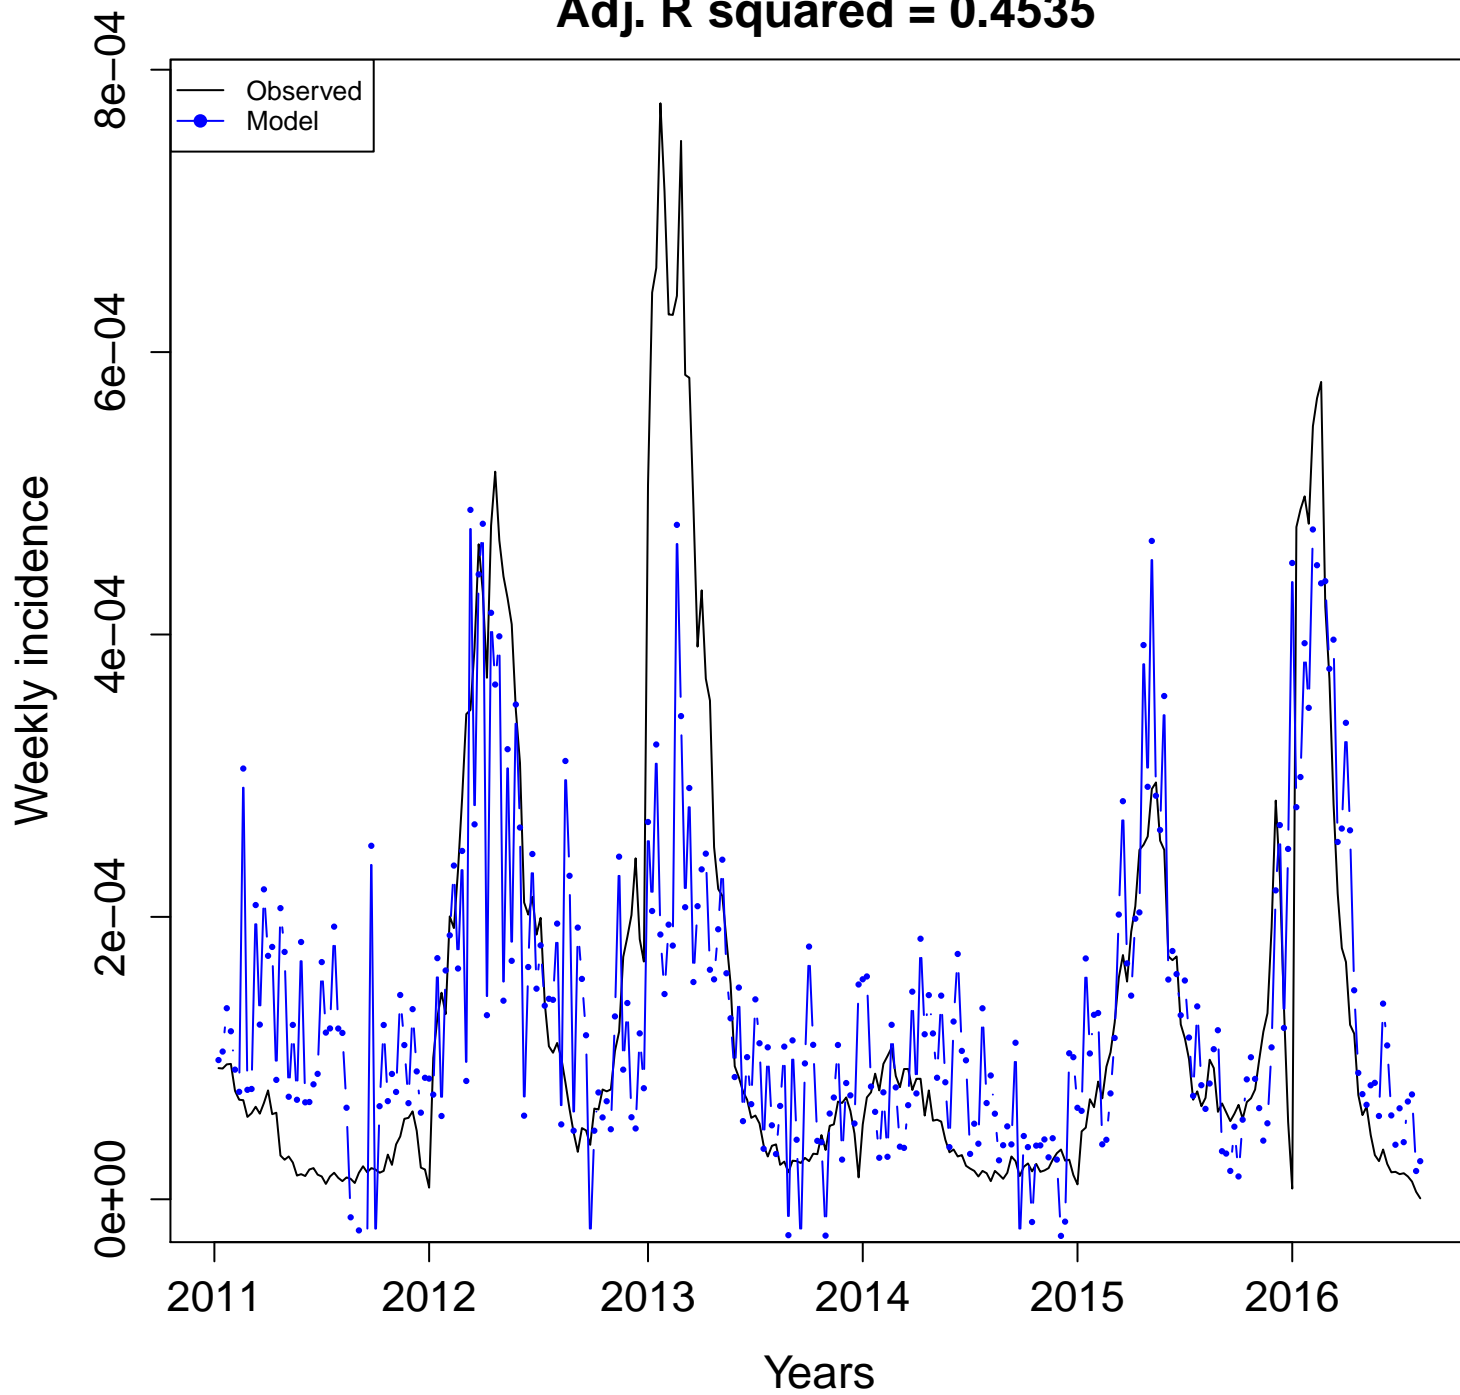

**Individual terms**  
**Adjusted R squared**

**Mato Grosso (MT)**

**MT- aedes.aegypti**  
**Adj. R squared = 0.0914**

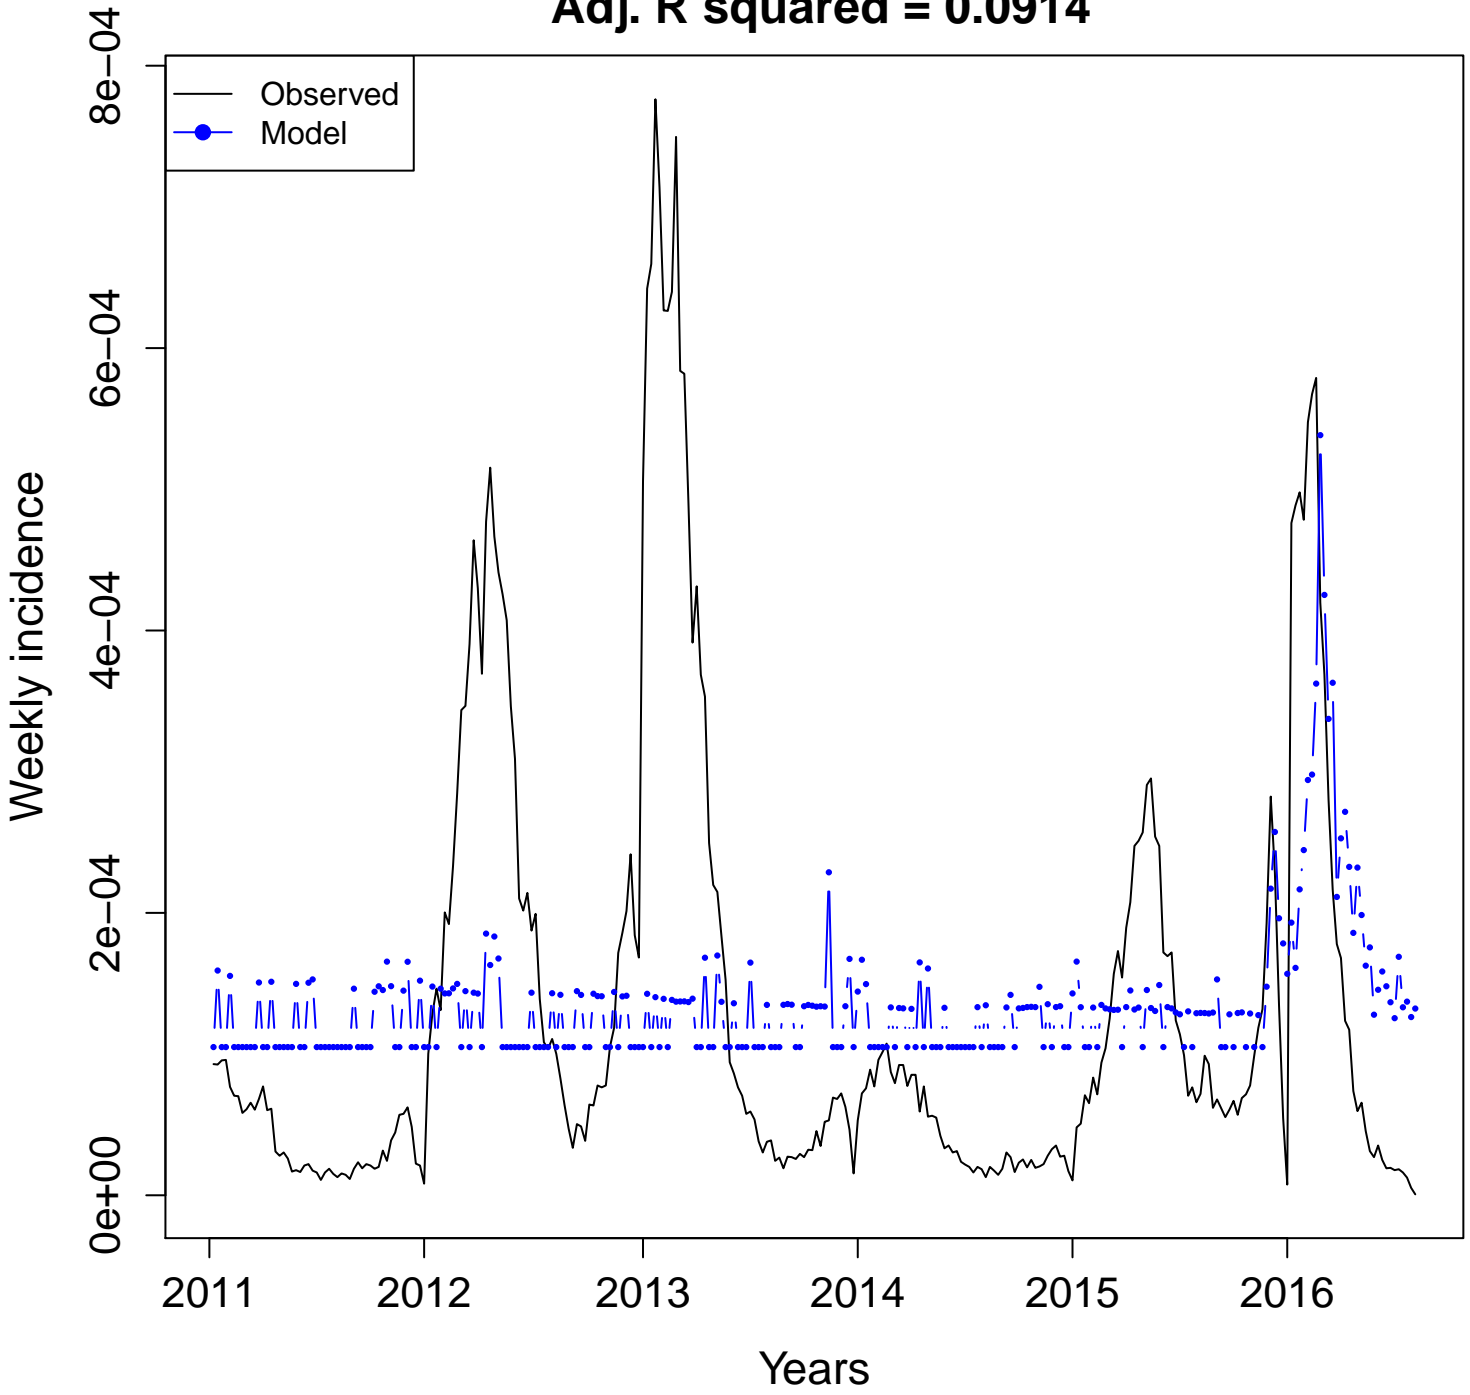

**MT- aedes**  
**Adj. R squared = 0.0955**

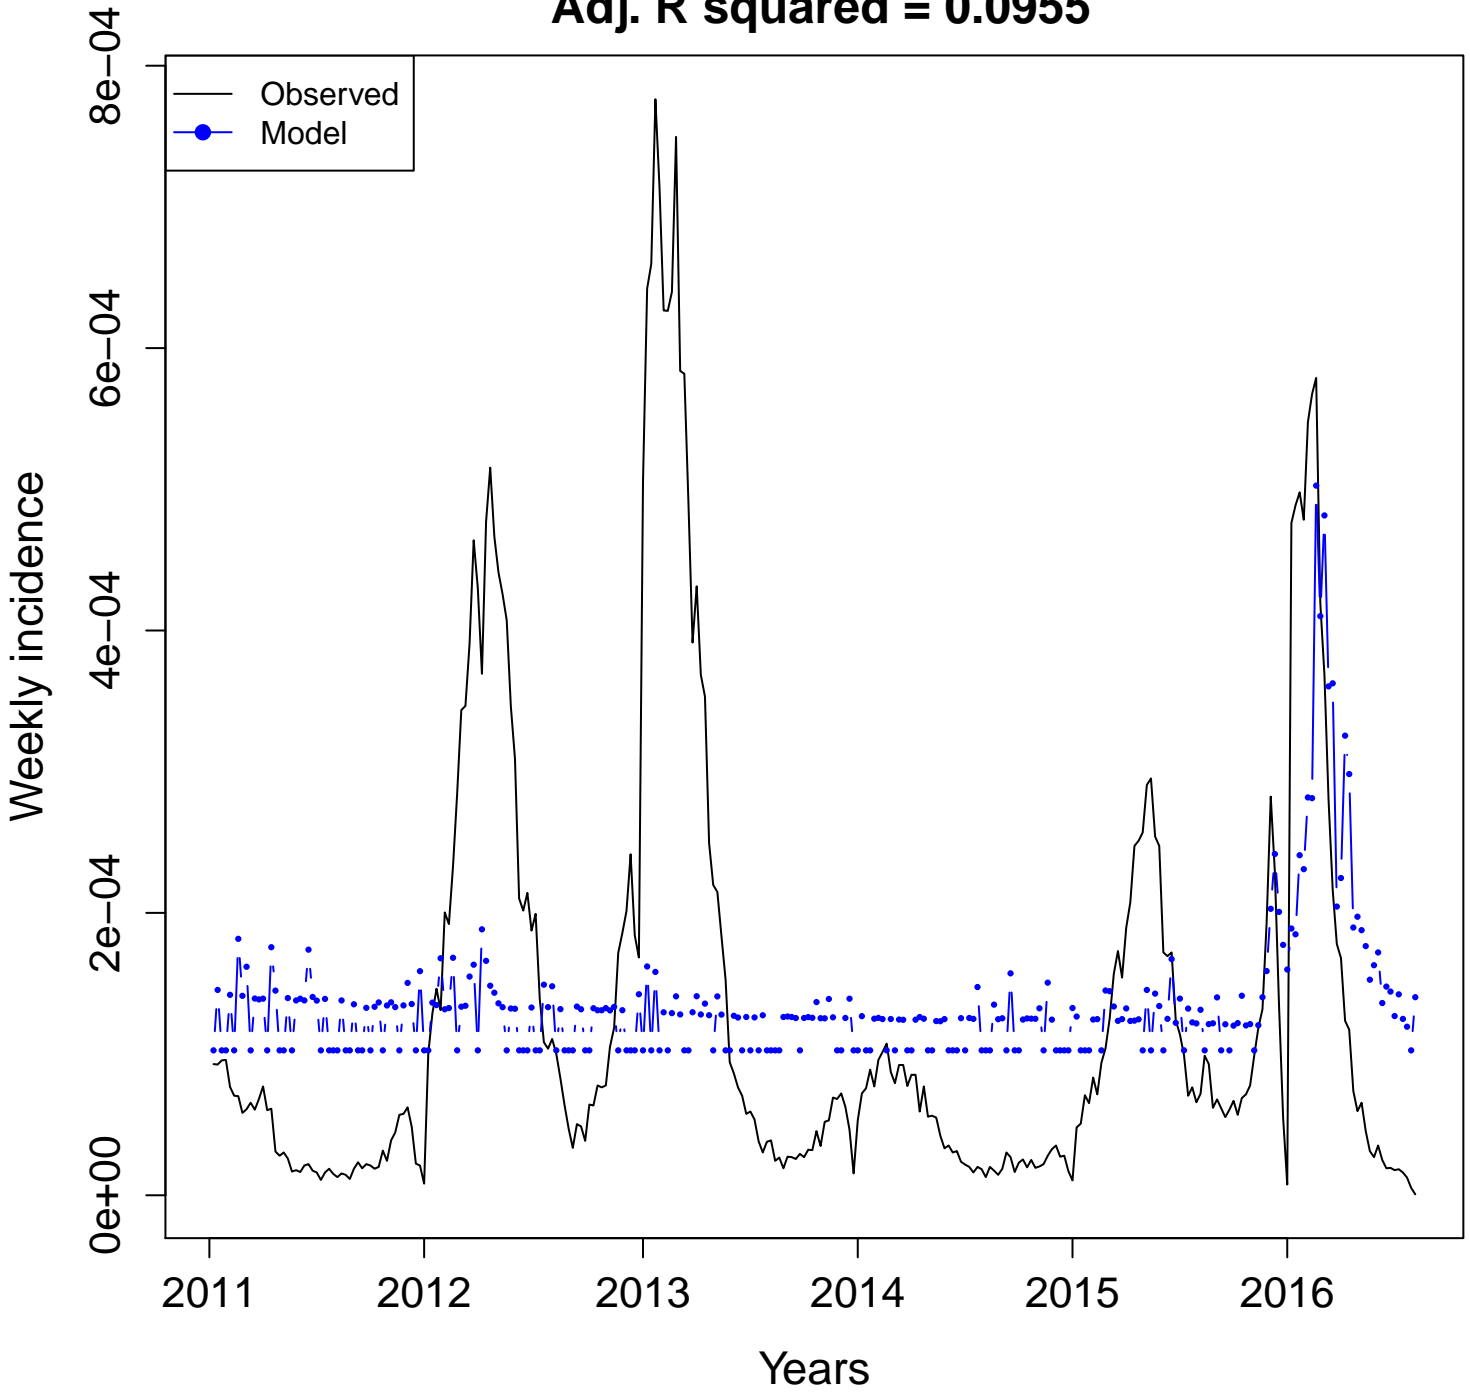

**MT- aegypti**  
**Adj. R squared = 0.0887**

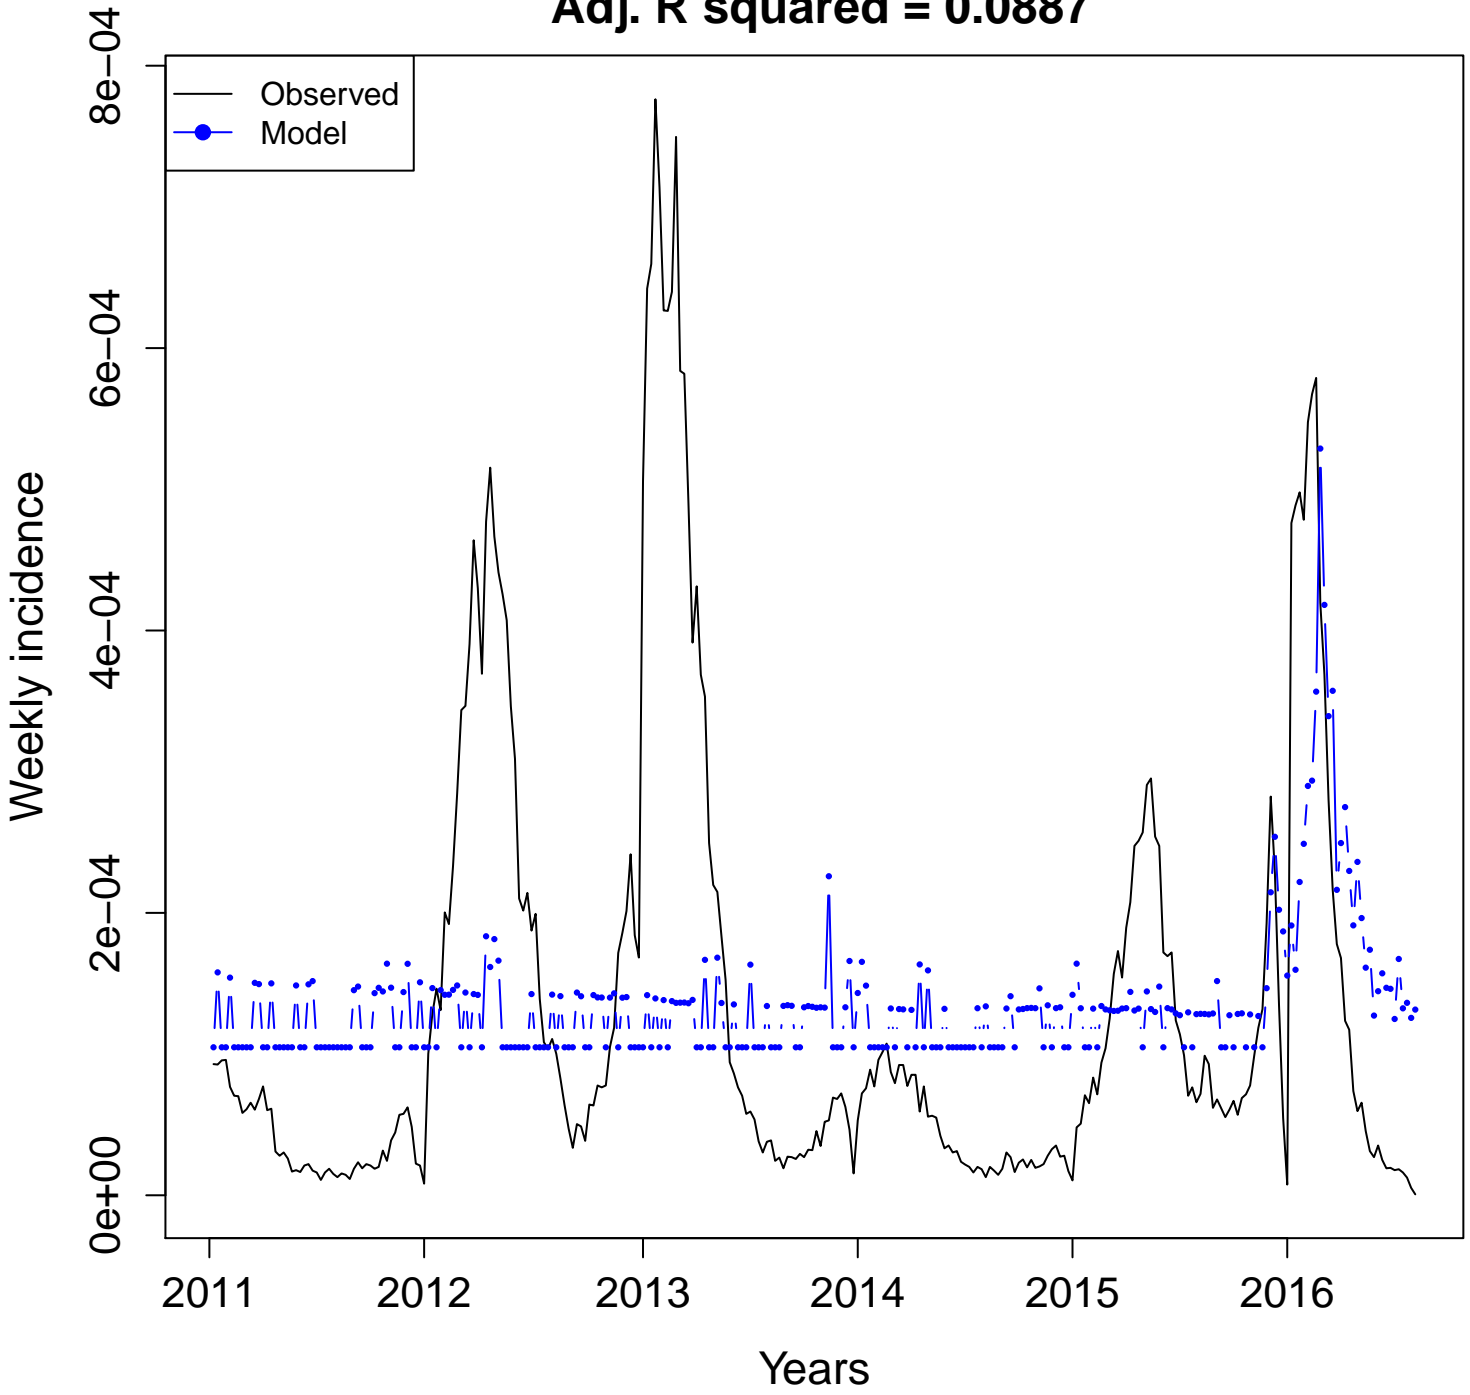

# MT- dengue

Adj. R squared = 0.4644

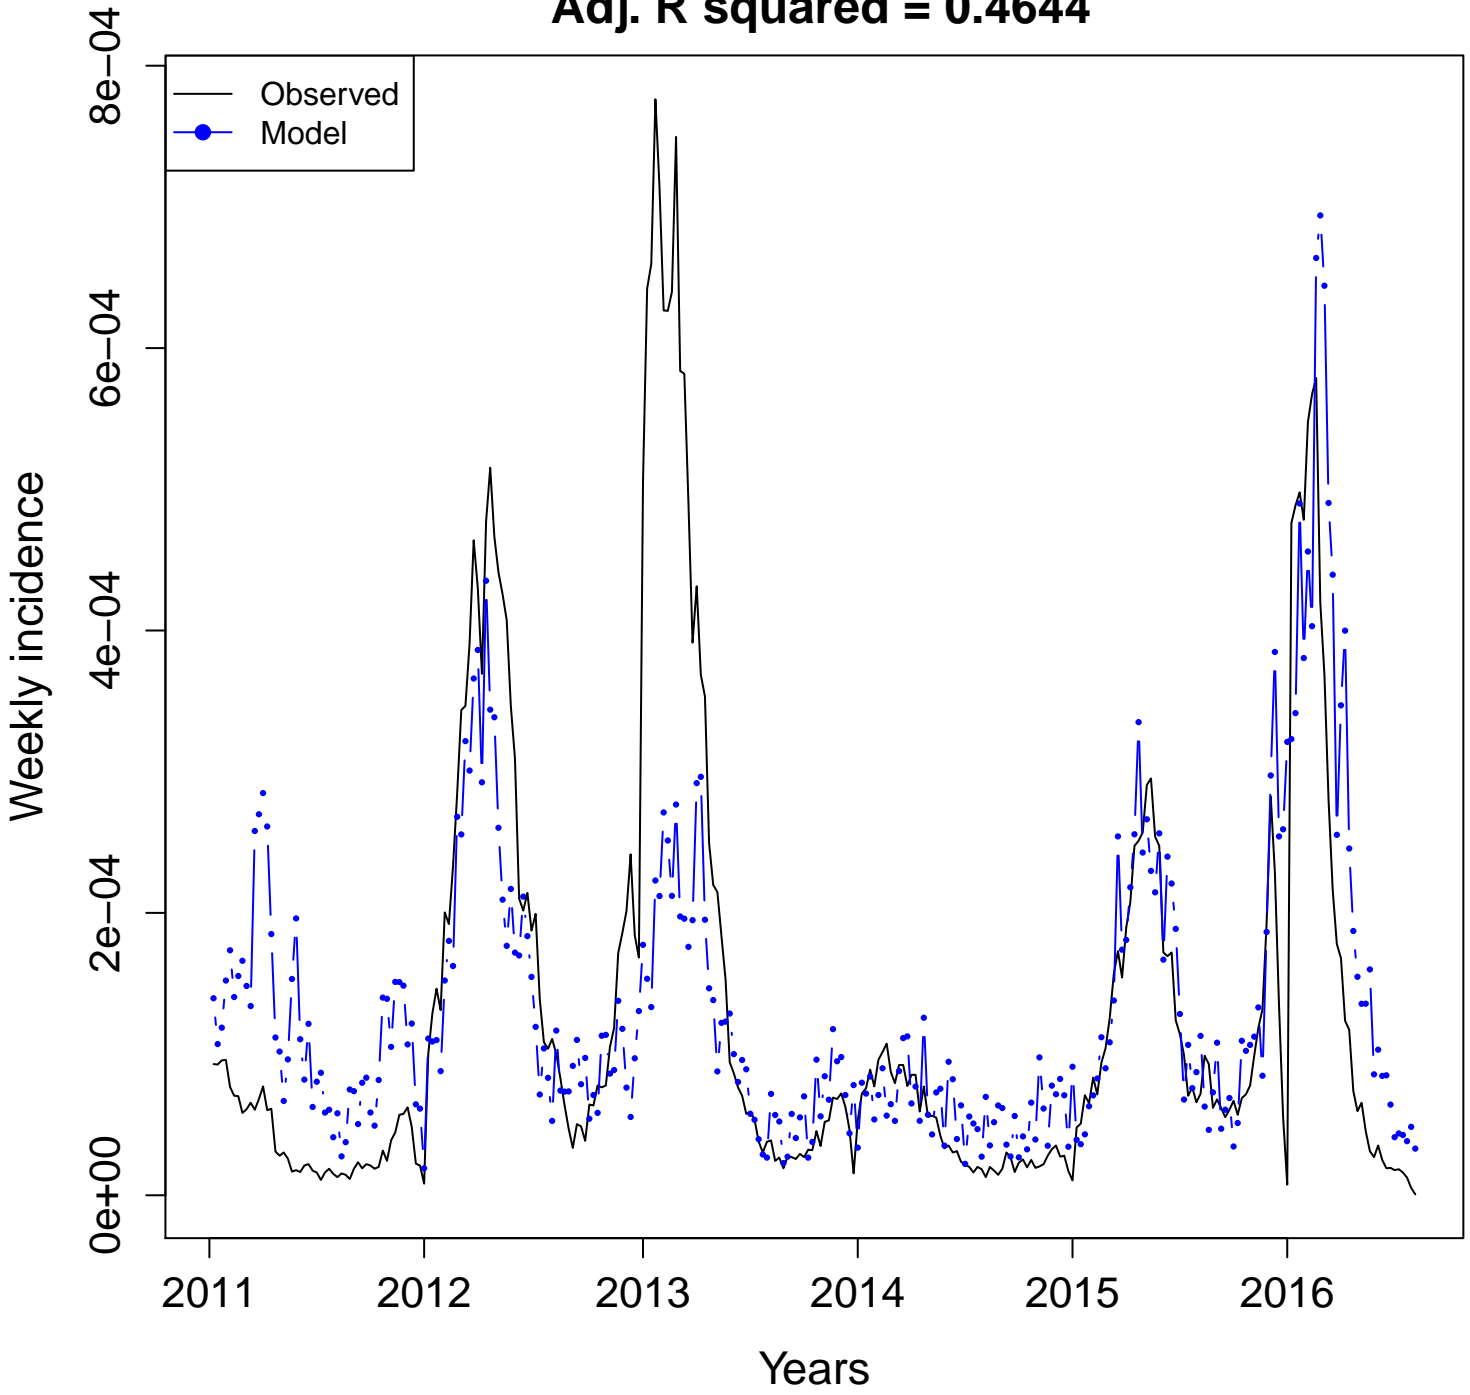

**MT- dengue.sintomas**  
**Adj. R squared = 0.49**

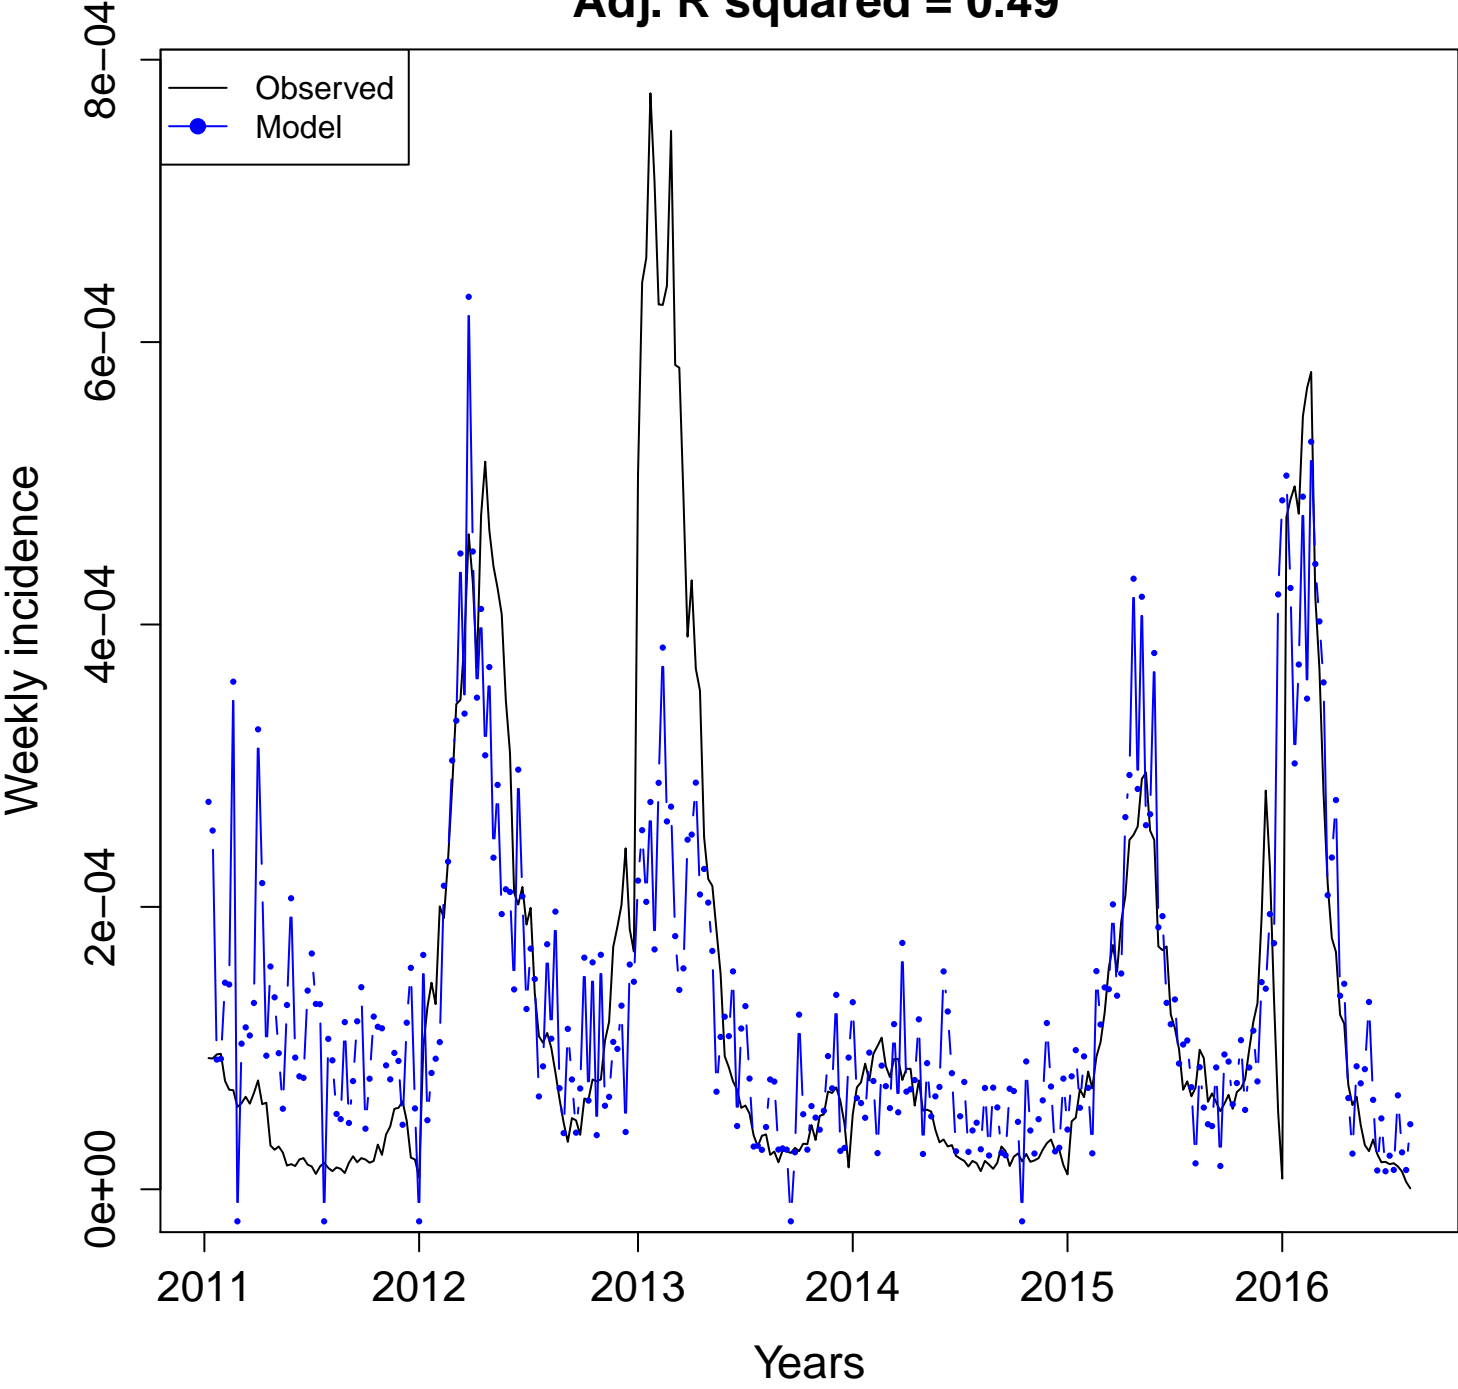

**MT- dengue.virus**  
**Adj. R squared = 0**

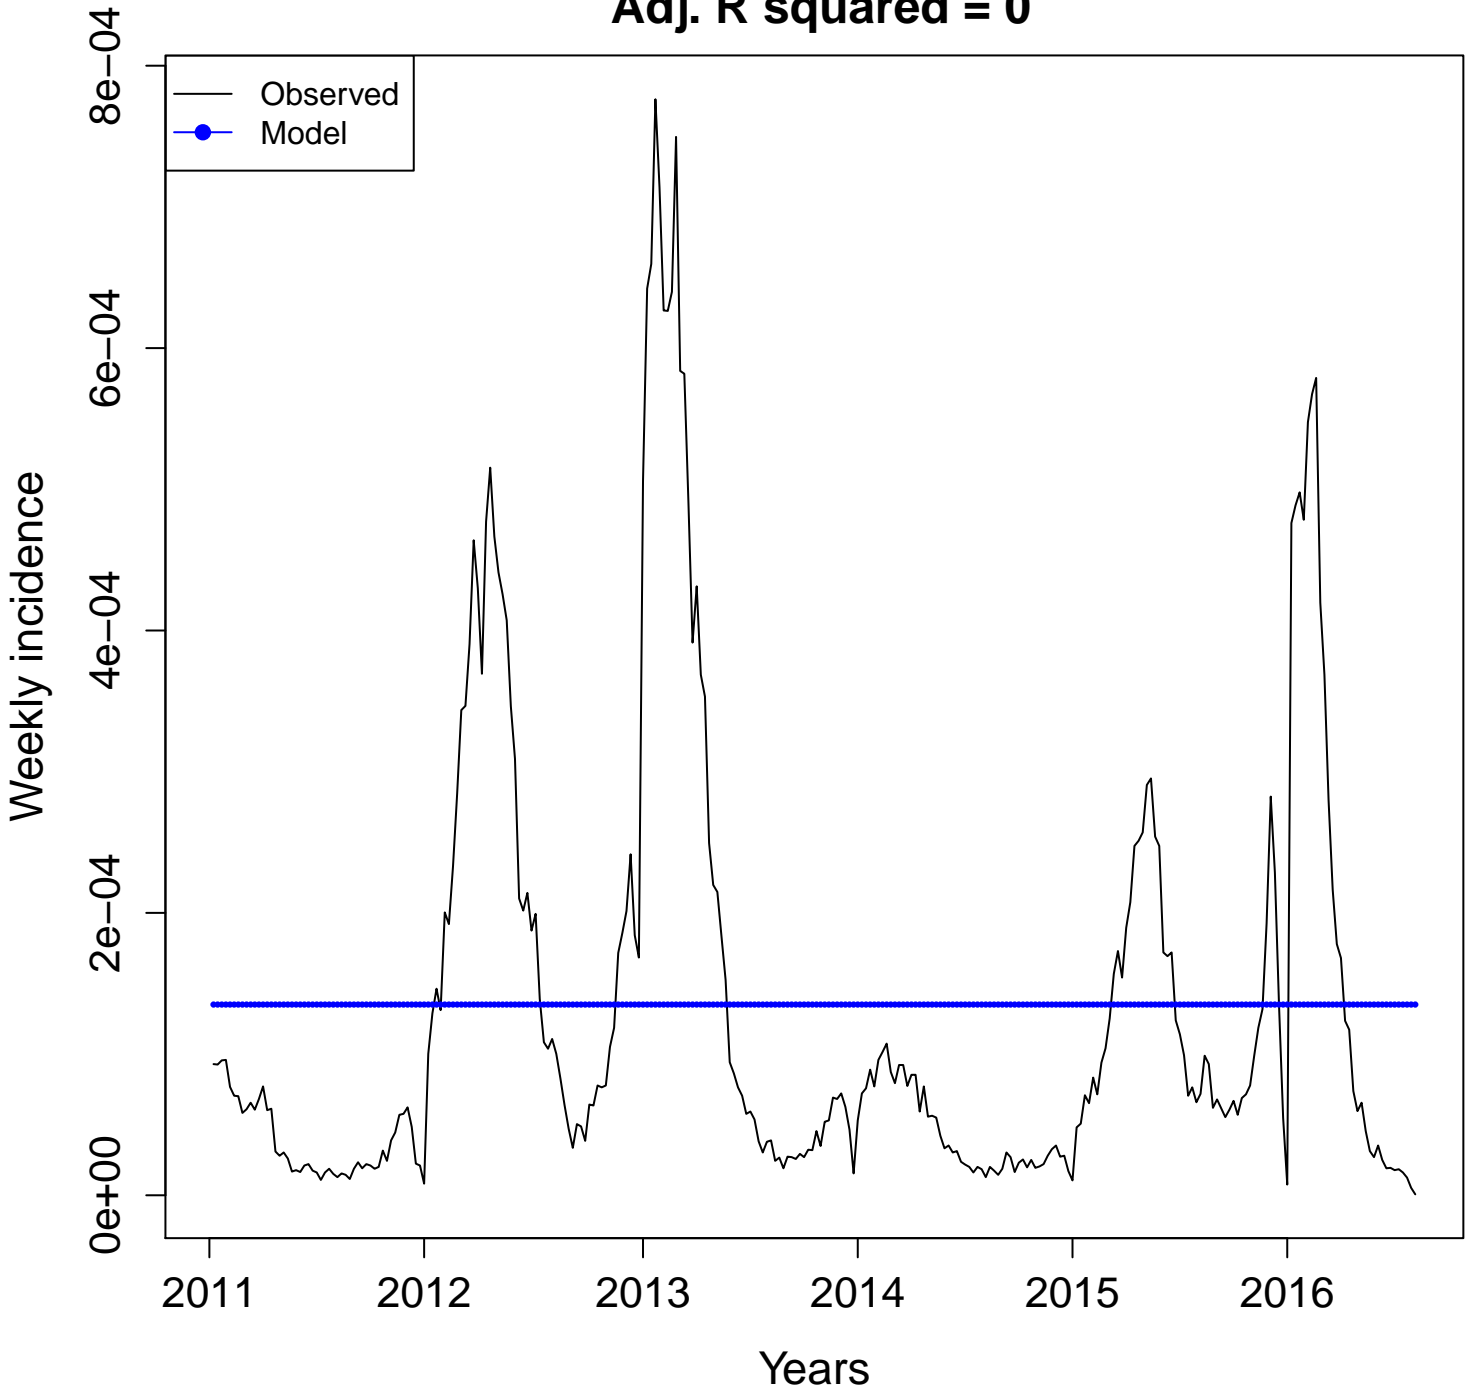



**MT- mosquito.dengue**  
**Adj. R squared = 0.1344**

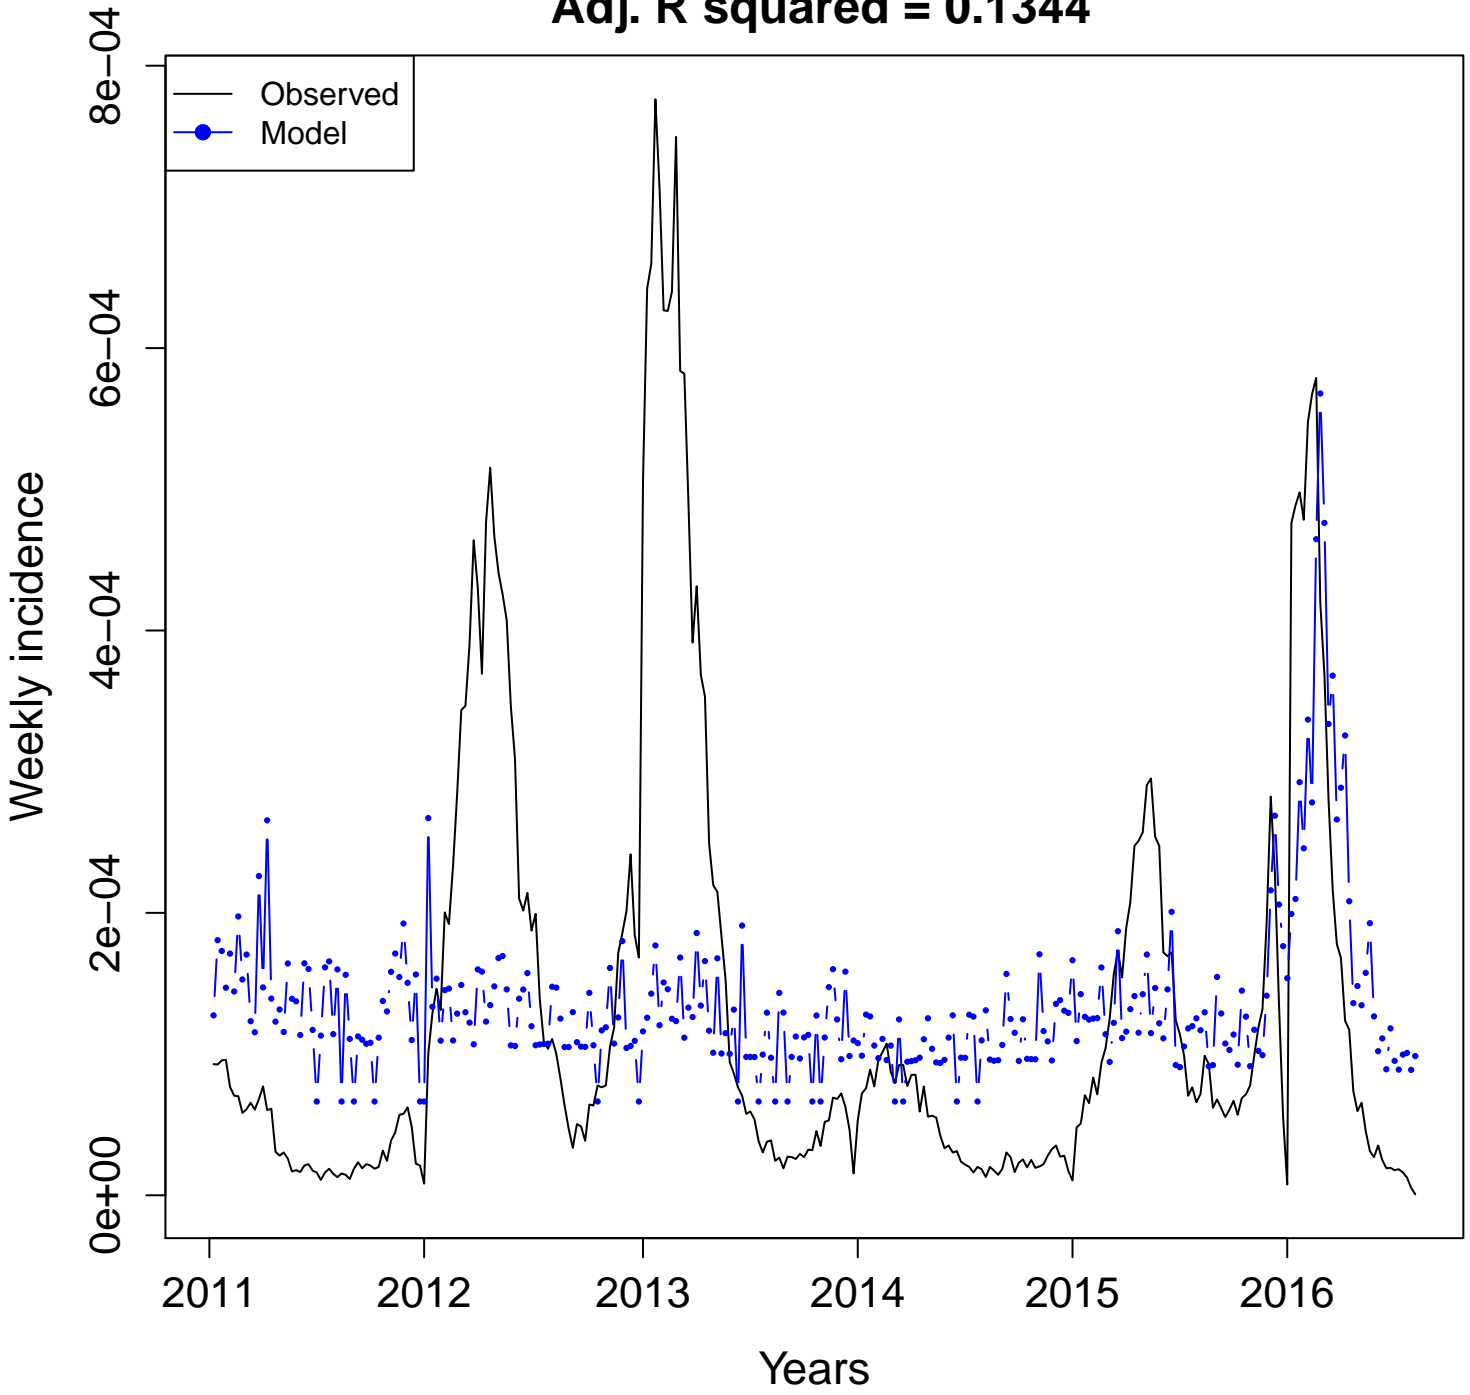

# MT- mosquito

Adj. R squared = 0.1546

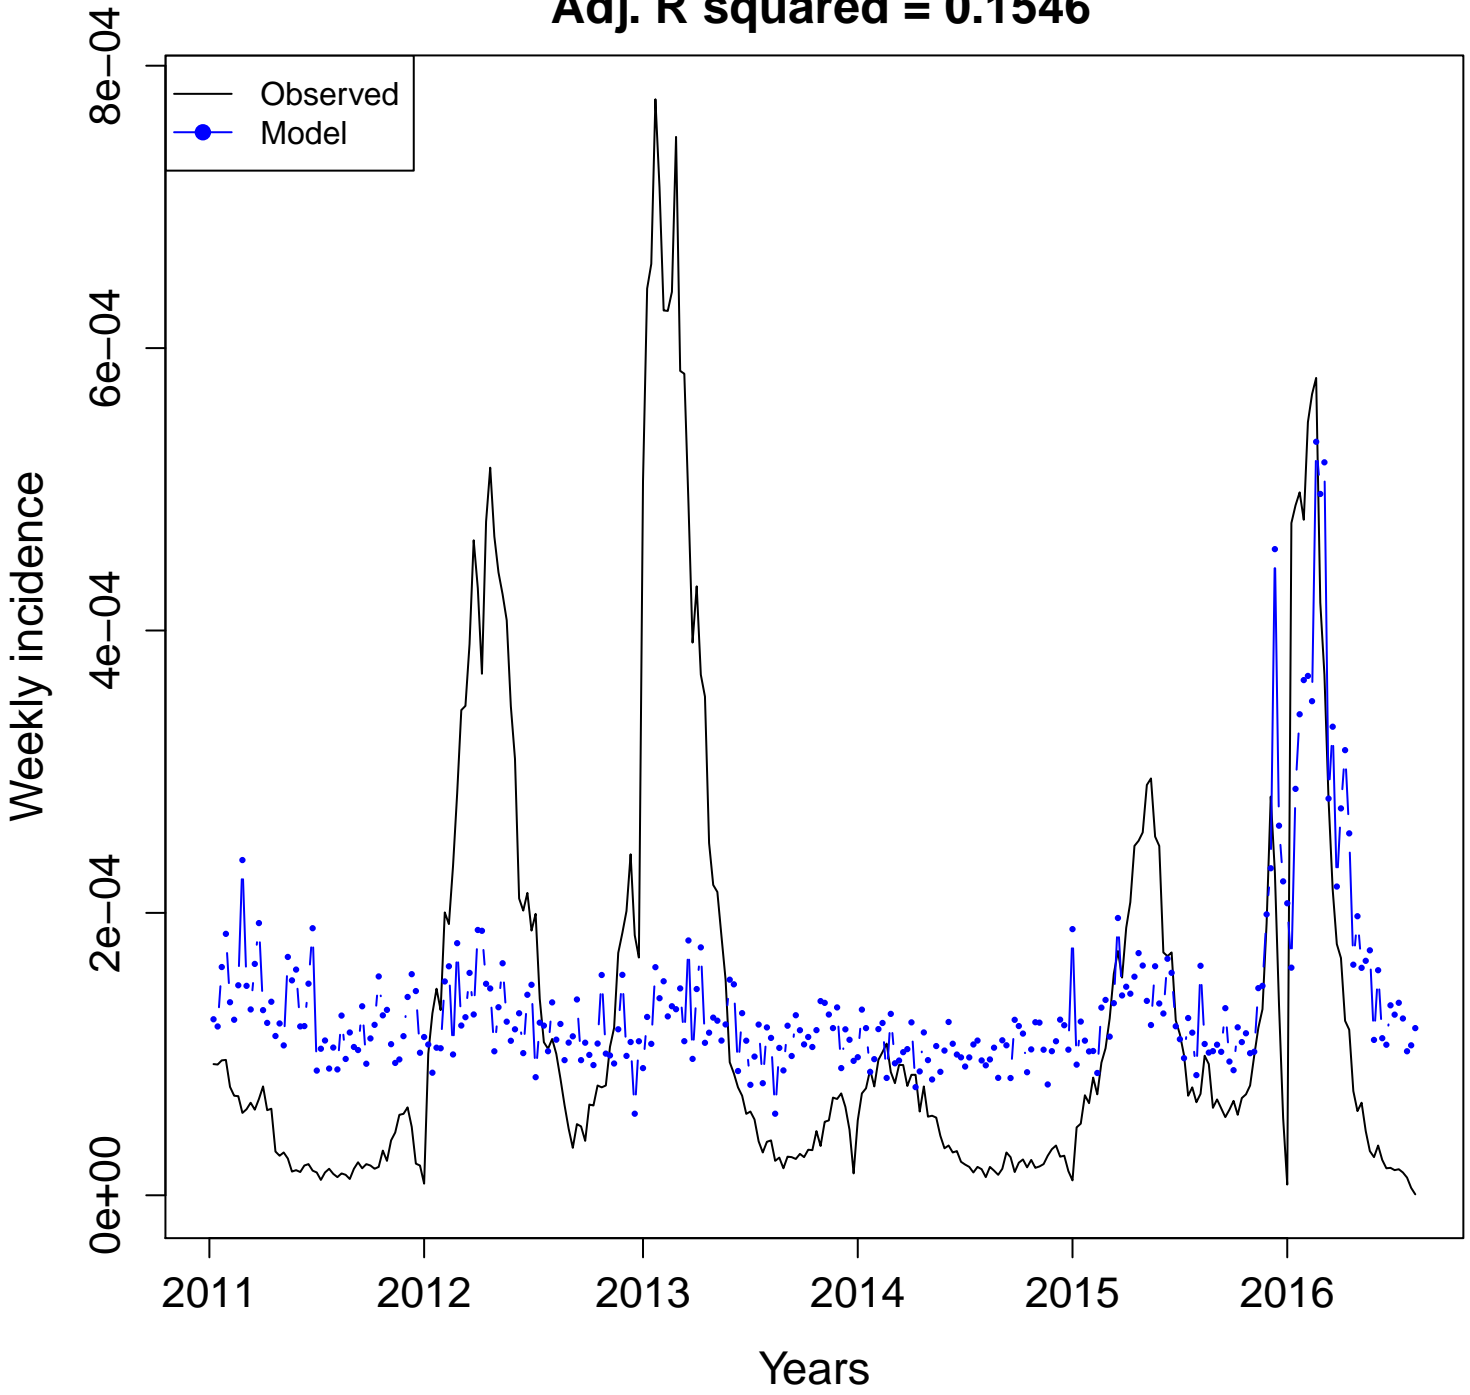

**MT- sintomas.da.dengue**  
**Adj. R squared = 0.449**

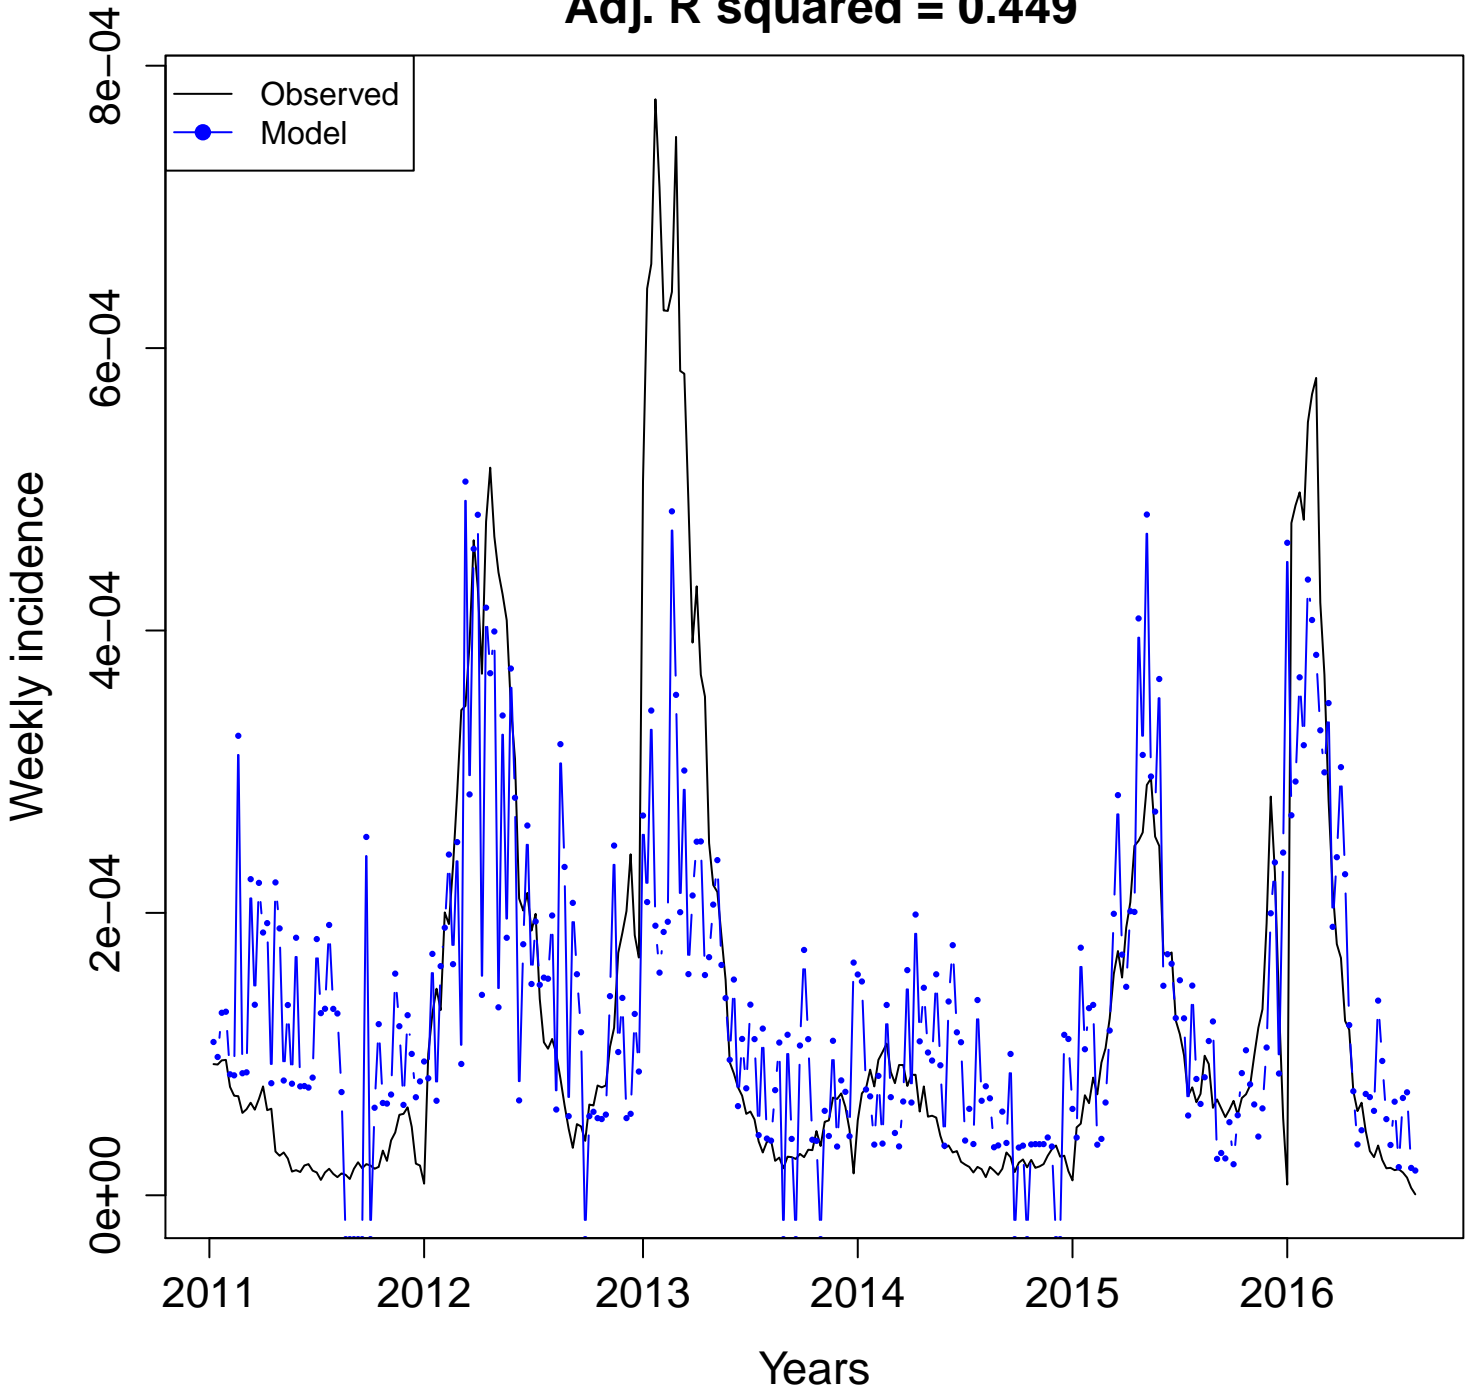

## Pará (PA)

# Dengue incidence vs. Google Health Trends (2011–2016)

### Definitions:

- **Combined terms:**
  - **All:** model with all the available terms.  $n$  = number of terms
  - **Four:** model with "dengue", "dengue sintomas", "aedes", and "mosquito".
  - **Uncorrelated:** model with non-correlated terms.  $n$  = number of uncorrelated terms
- **Individual terms:** Plots developed with one term at a time.
- Terms for all and uncorrelated models can be found in additional file 3.

**Combined terms  
Adjusted R squared**

**Pará (PA)**

All  
(n = 9)

BR-PA  
Adj. R squared = 0.6004

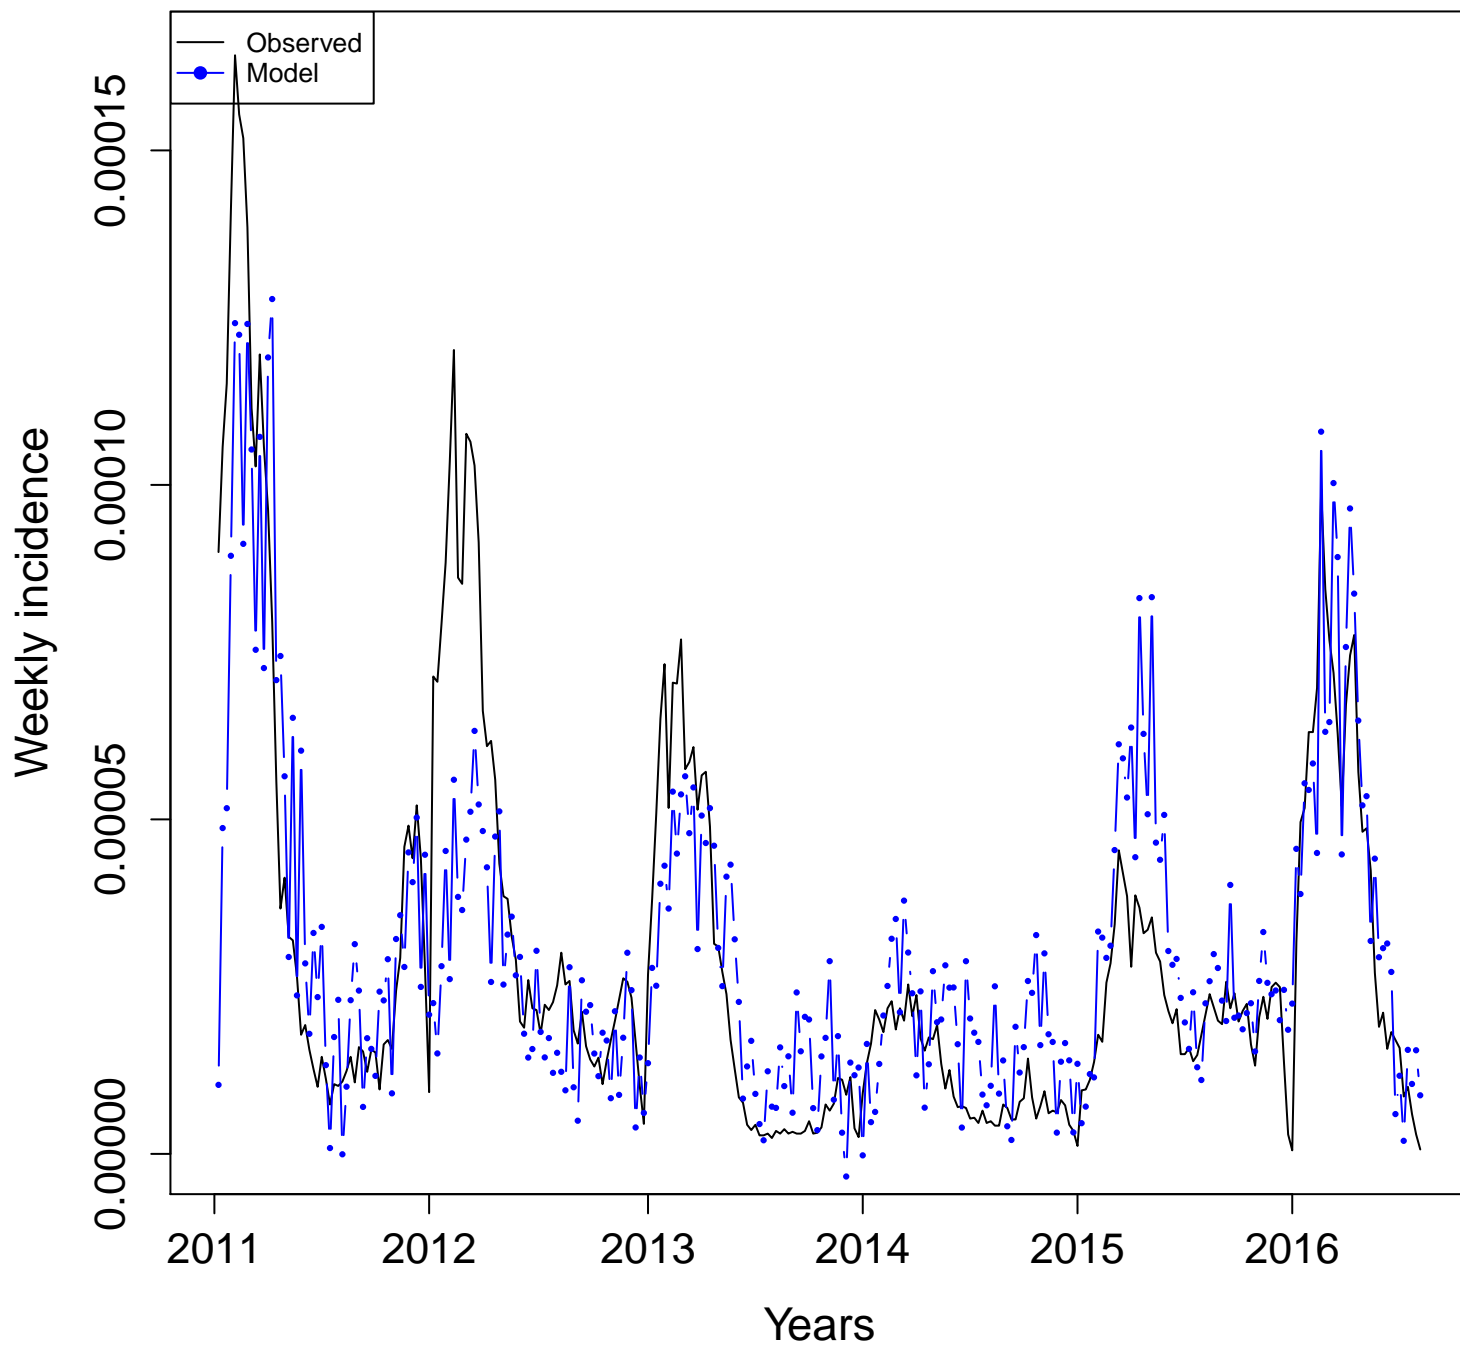

**BR-PA**  
**Adj. R squared = 0.5958**

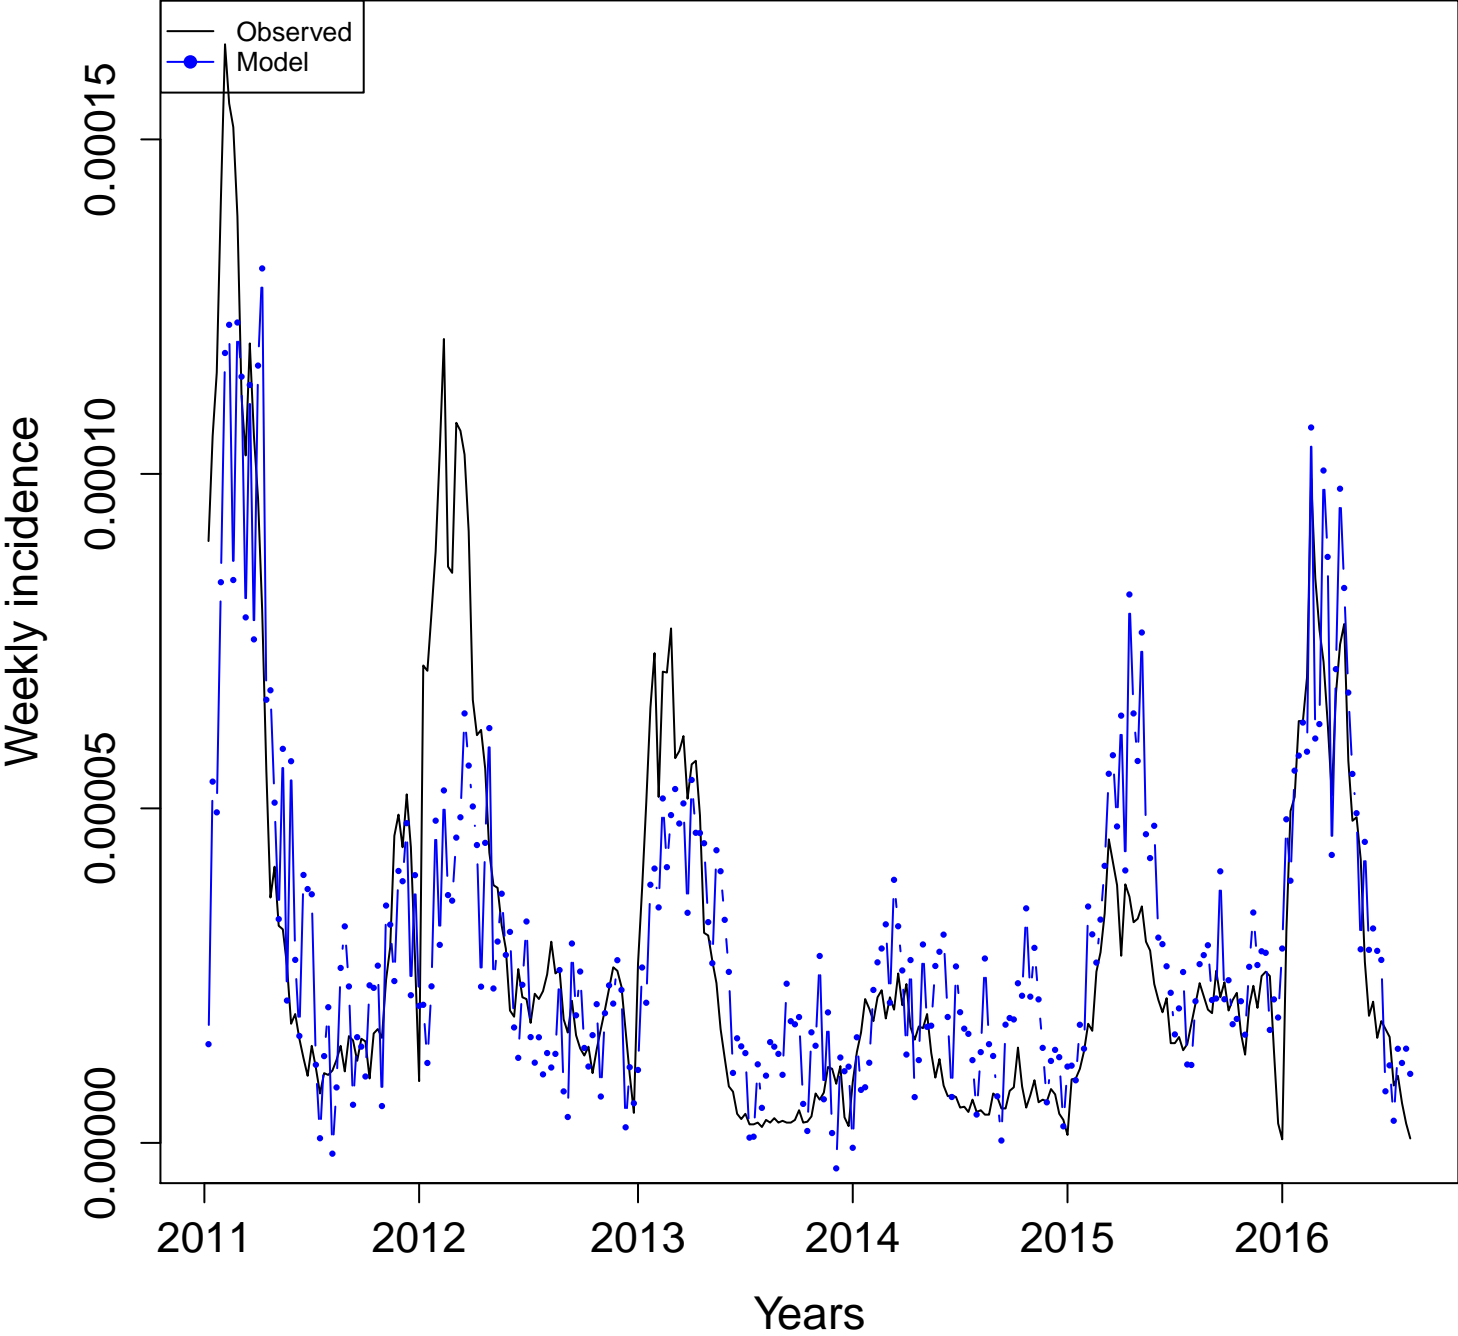

**Uncorrelated  
(n = 2)**

**BR-PA  
Adj. R squared = 0.2768**

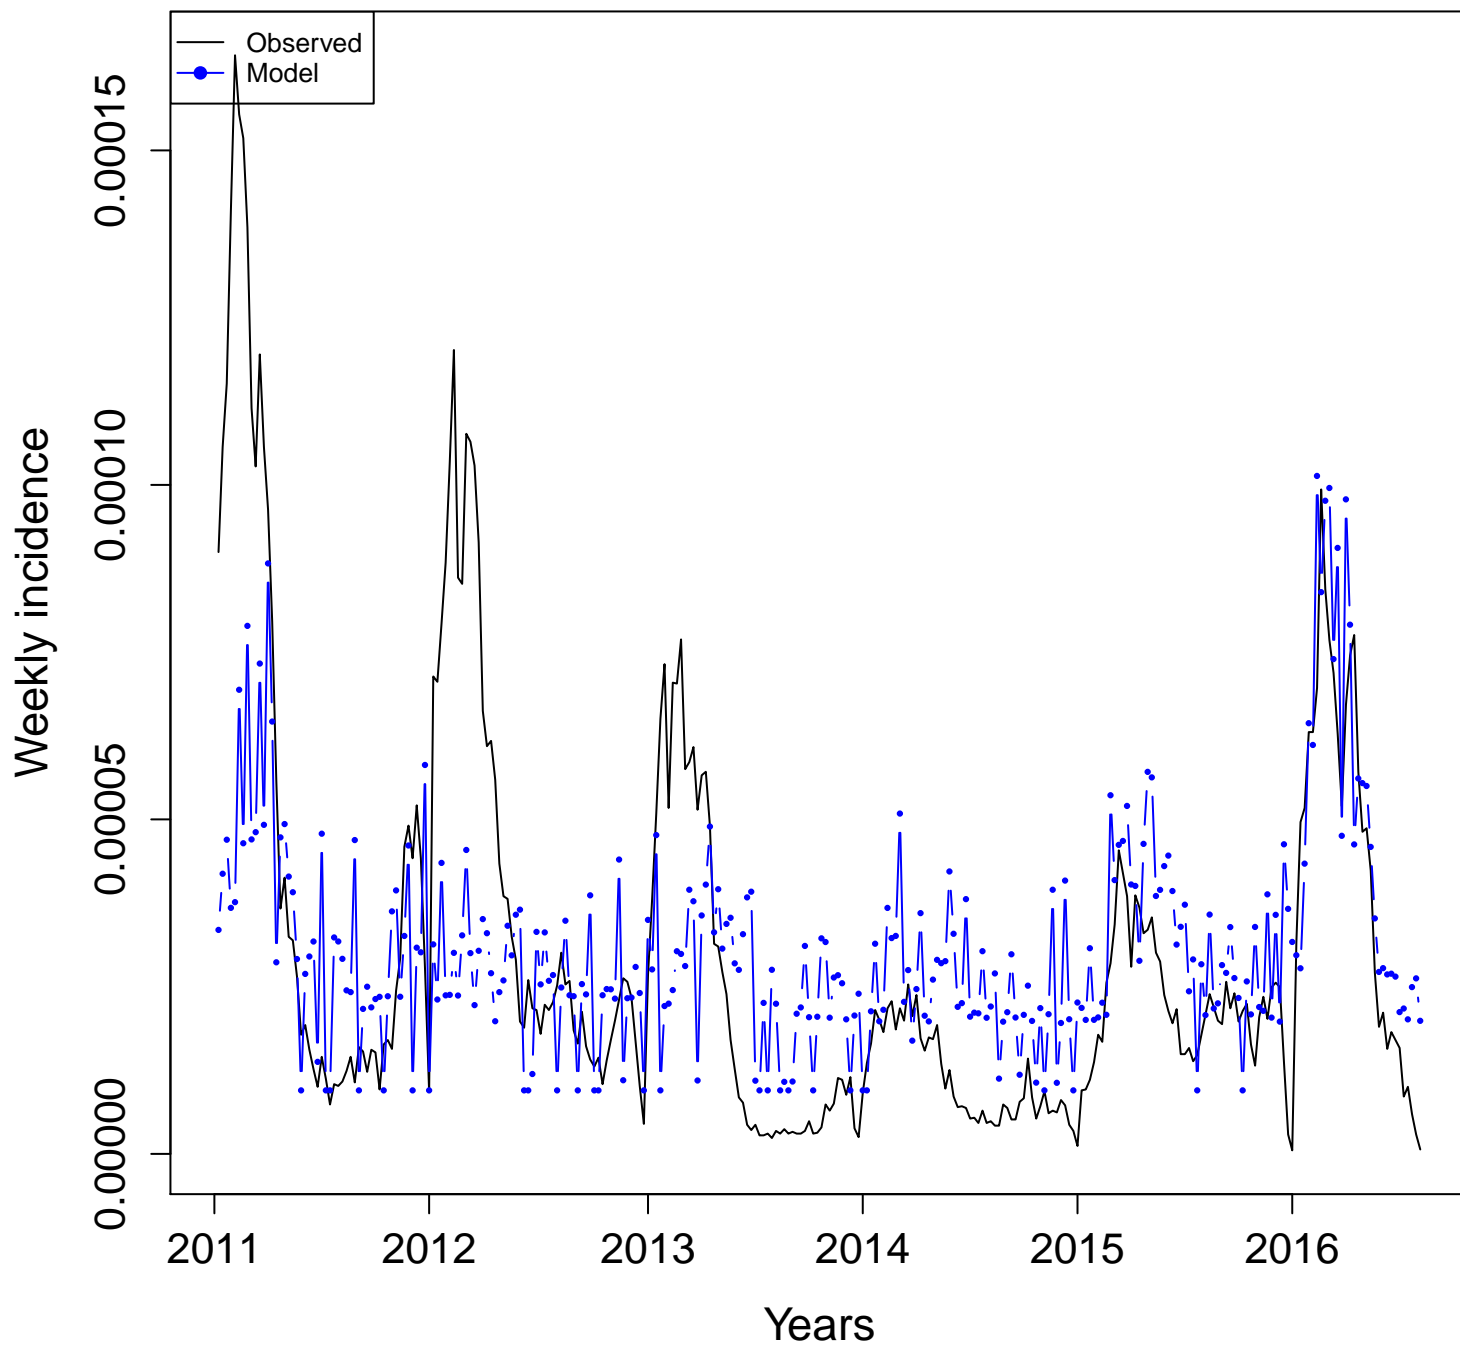



**Individual terms**  
**Adjusted R squared**

**Pará (PA)**

**PA- aedes.aegypti**  
**Adj. R squared = 0.079**

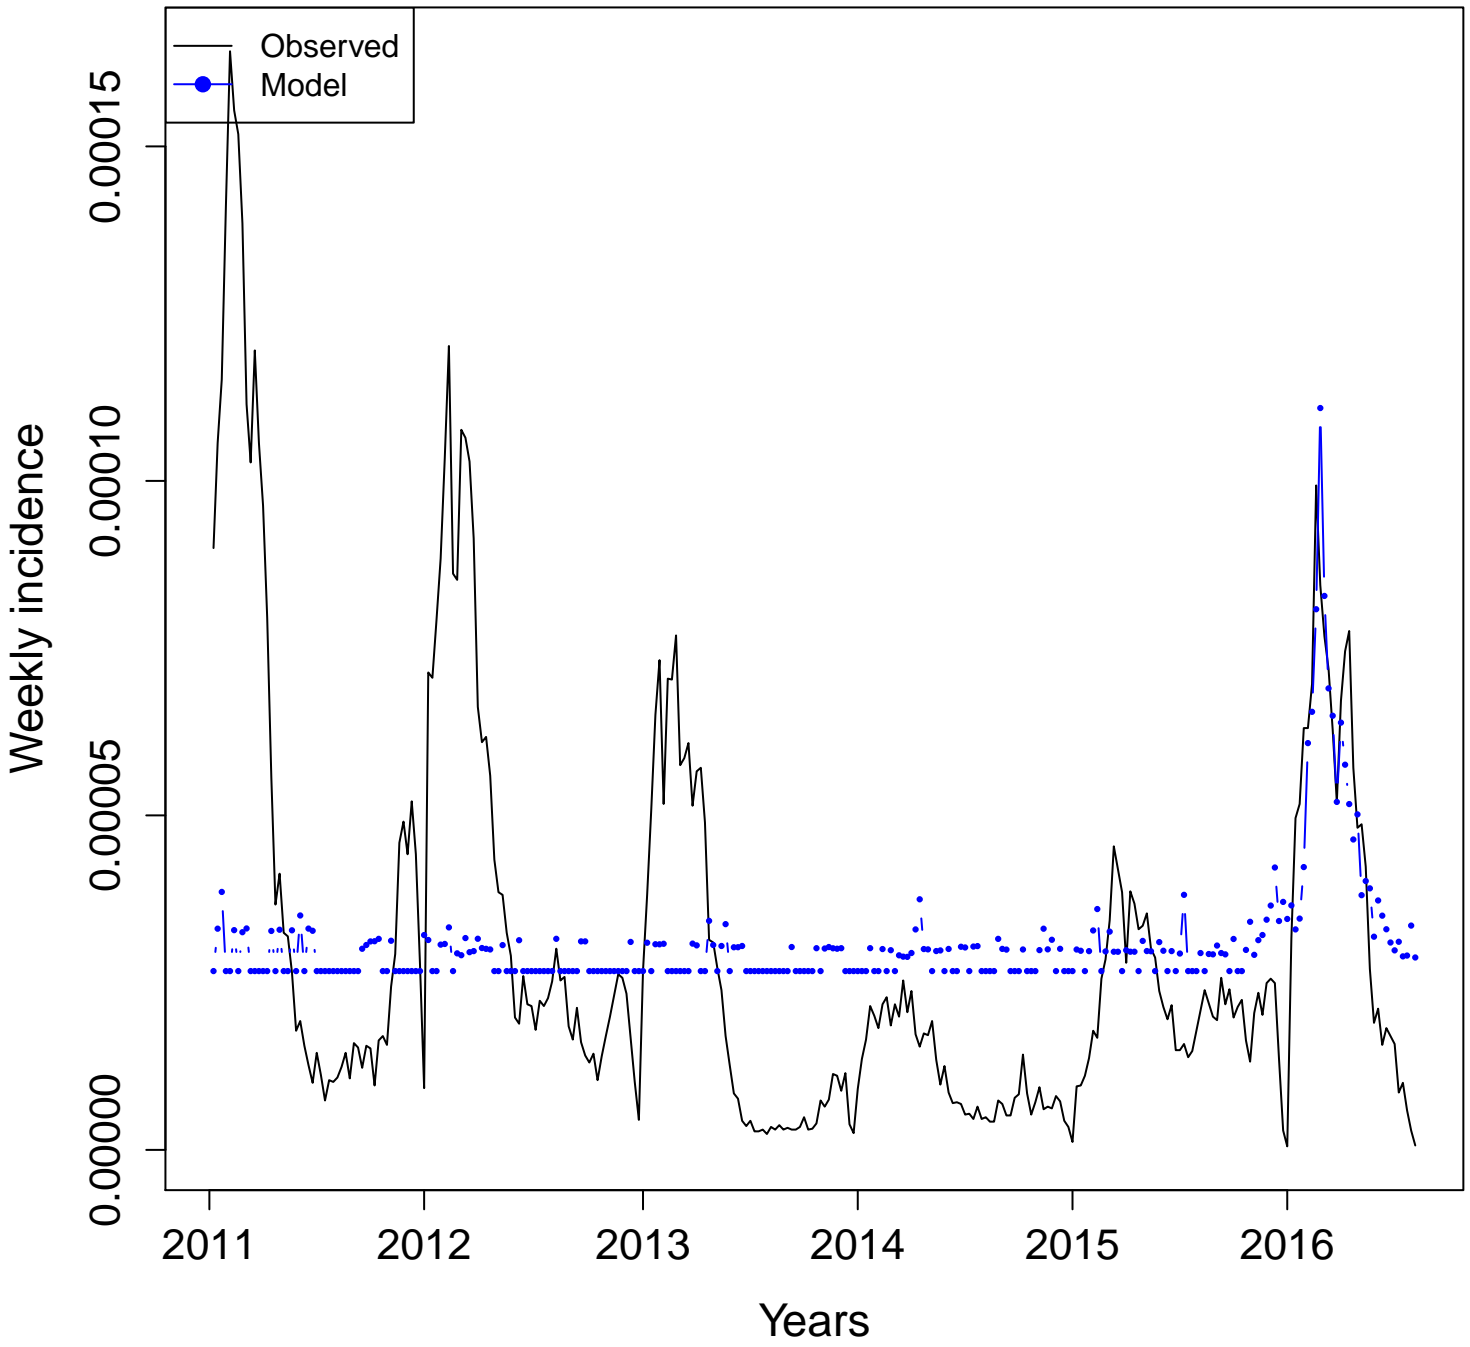

**PA- aedes**  
**Adj. R squared = 0.0862**

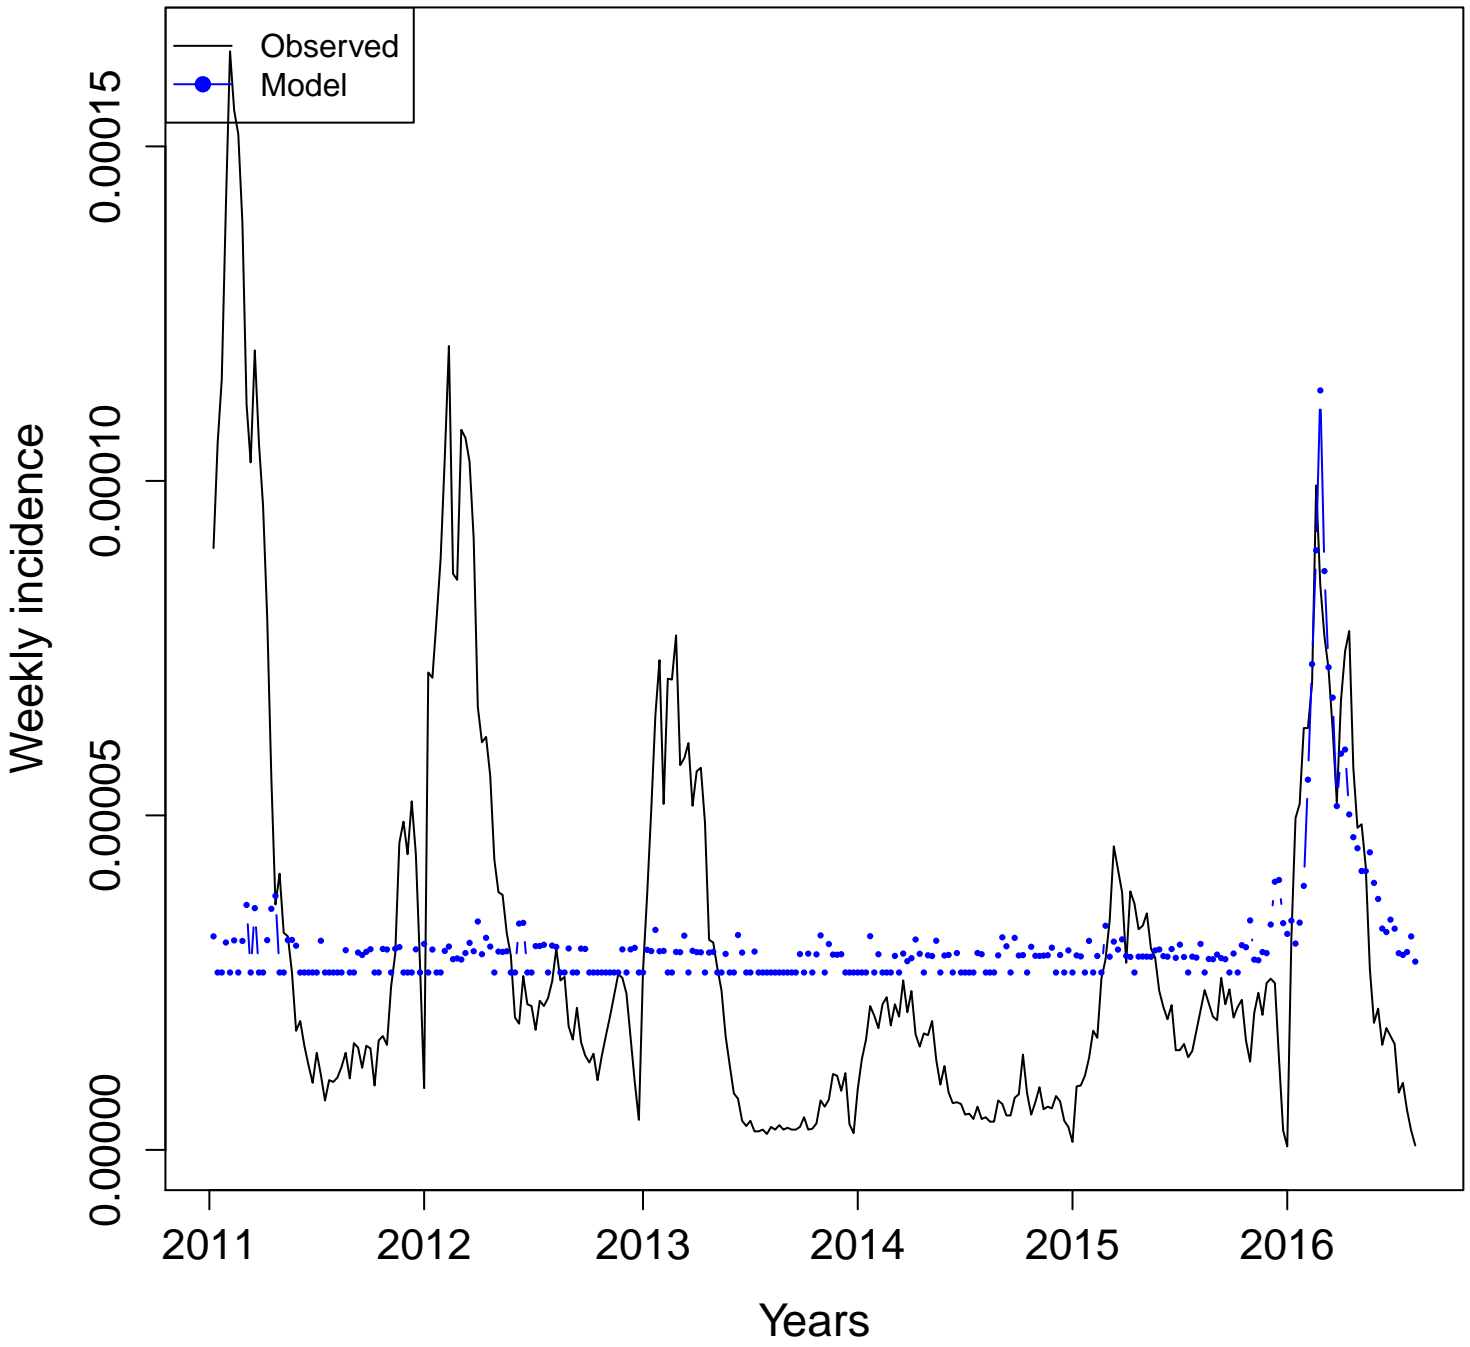

**PA- aegypti**  
**Adj. R squared = 0.0797**

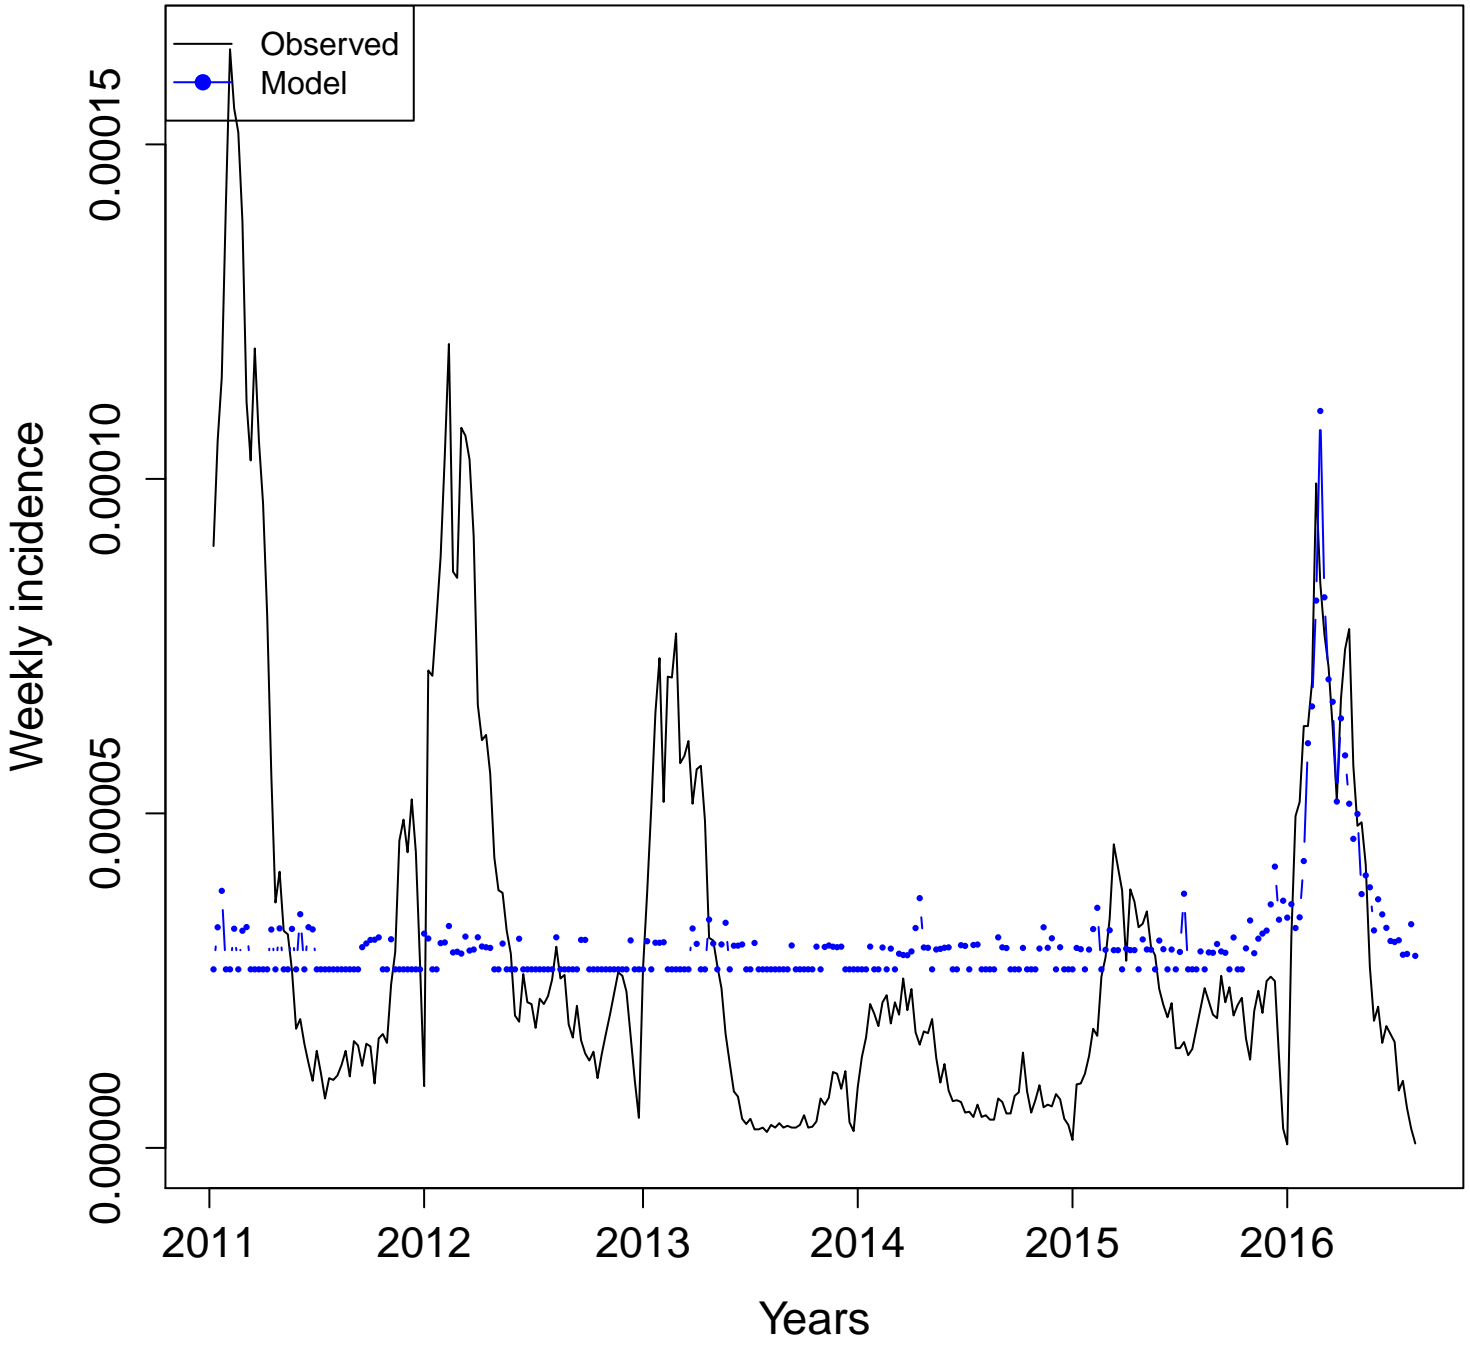

# PA- dengue

Adj. R squared = 0.4105

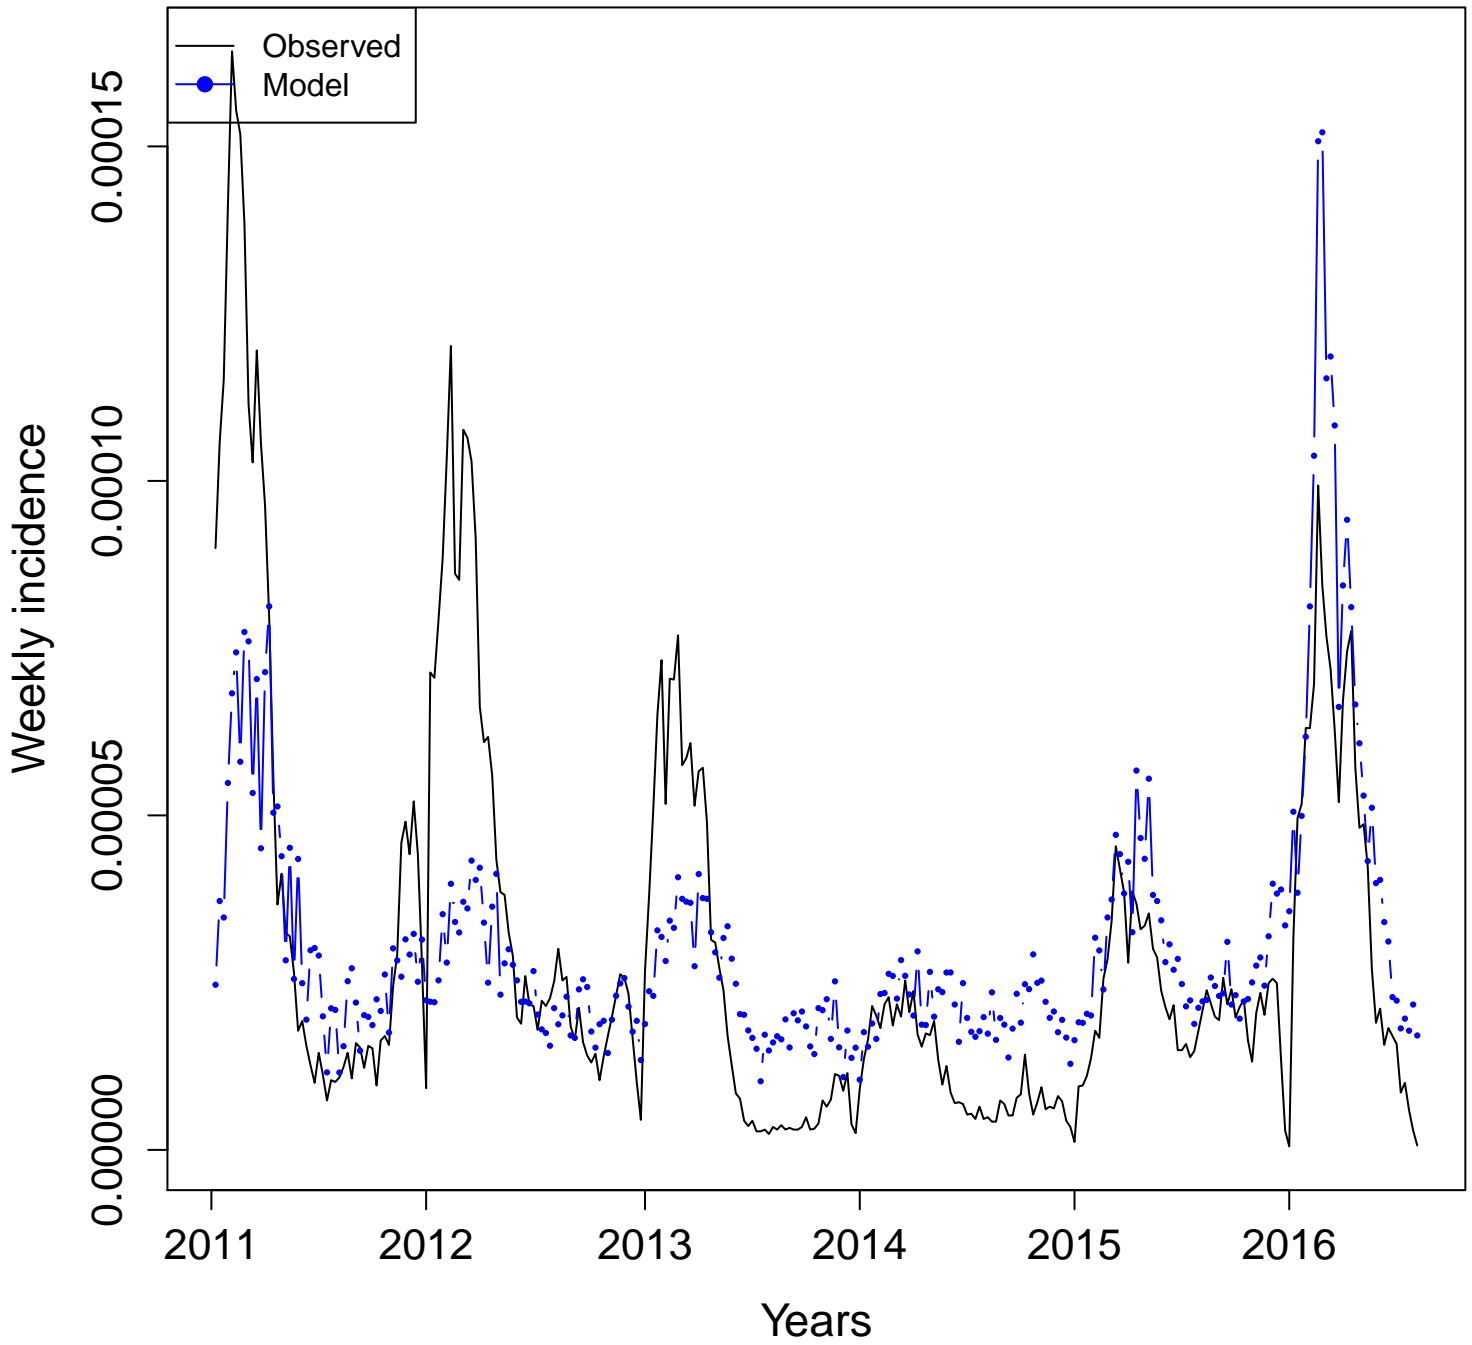

**PA- dengue.sintomas**  
**Adj. R squared = 0.2432**

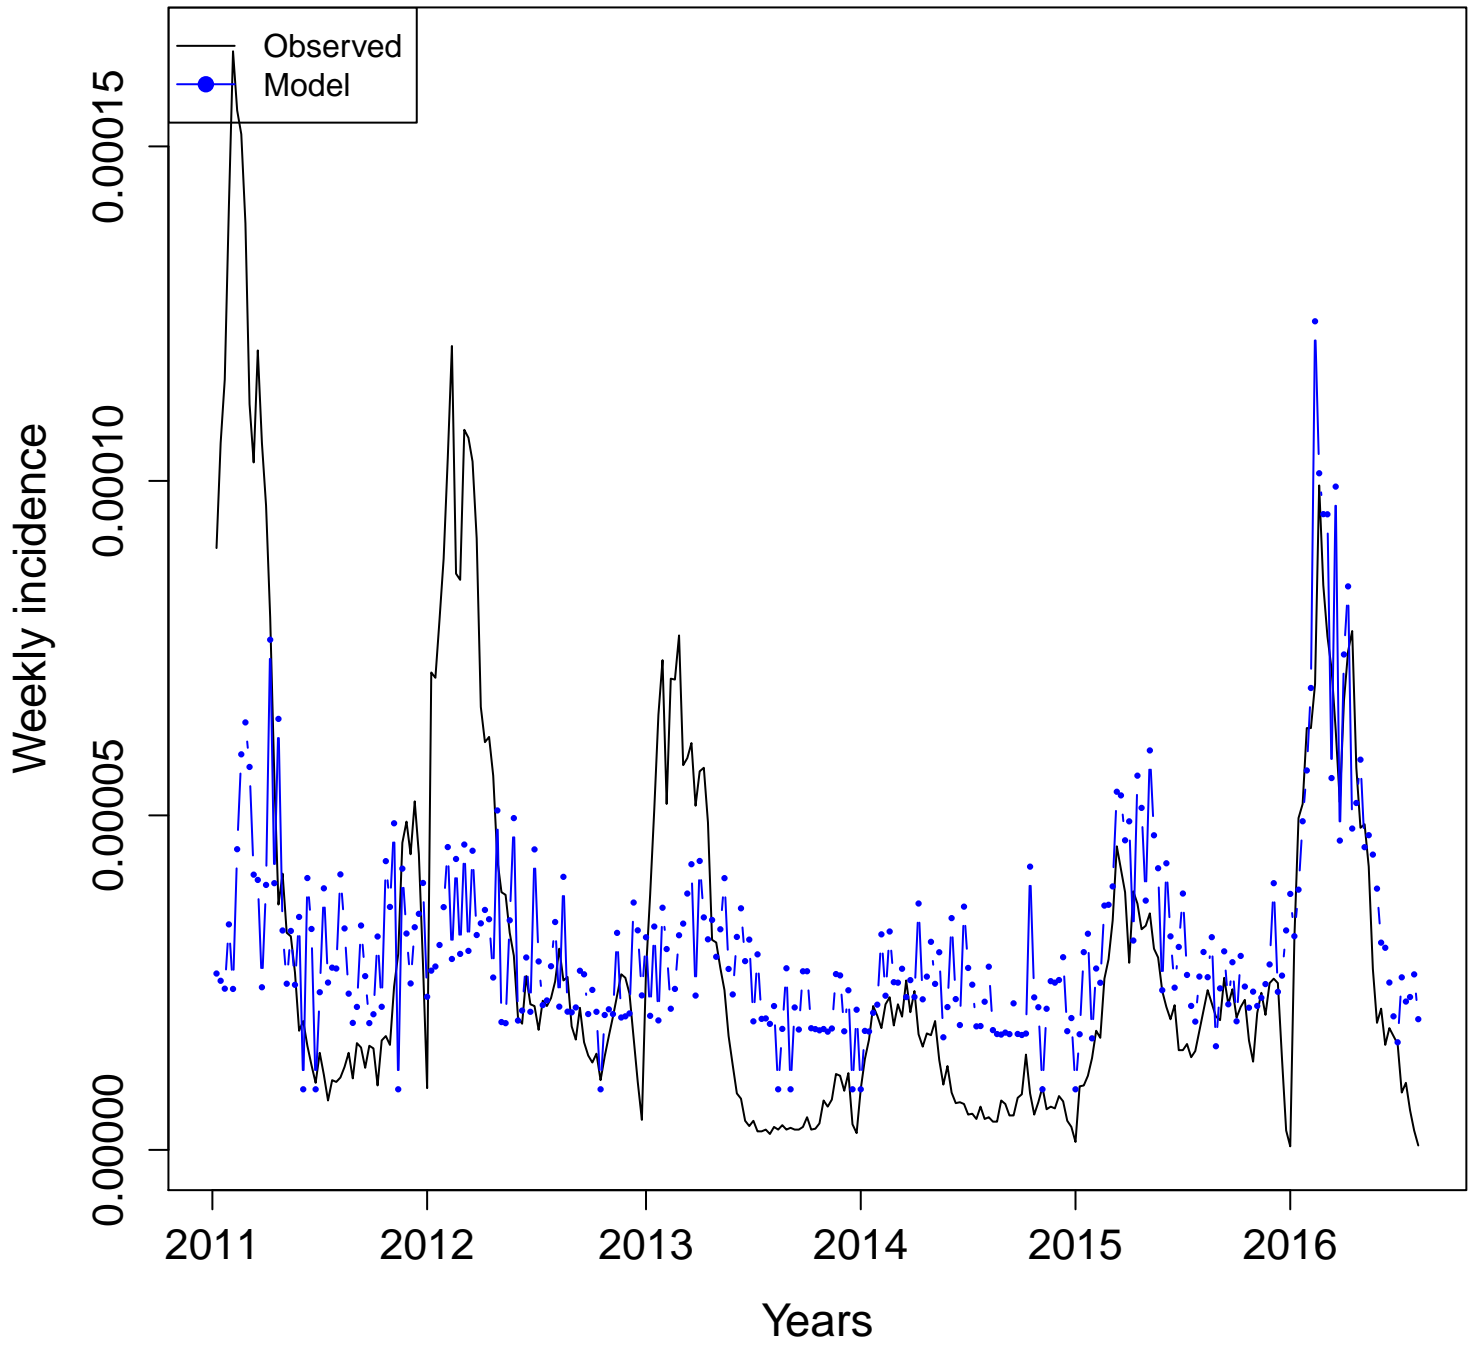

**PA- dengue.virus**  
**Adj. R squared = 0.0881**

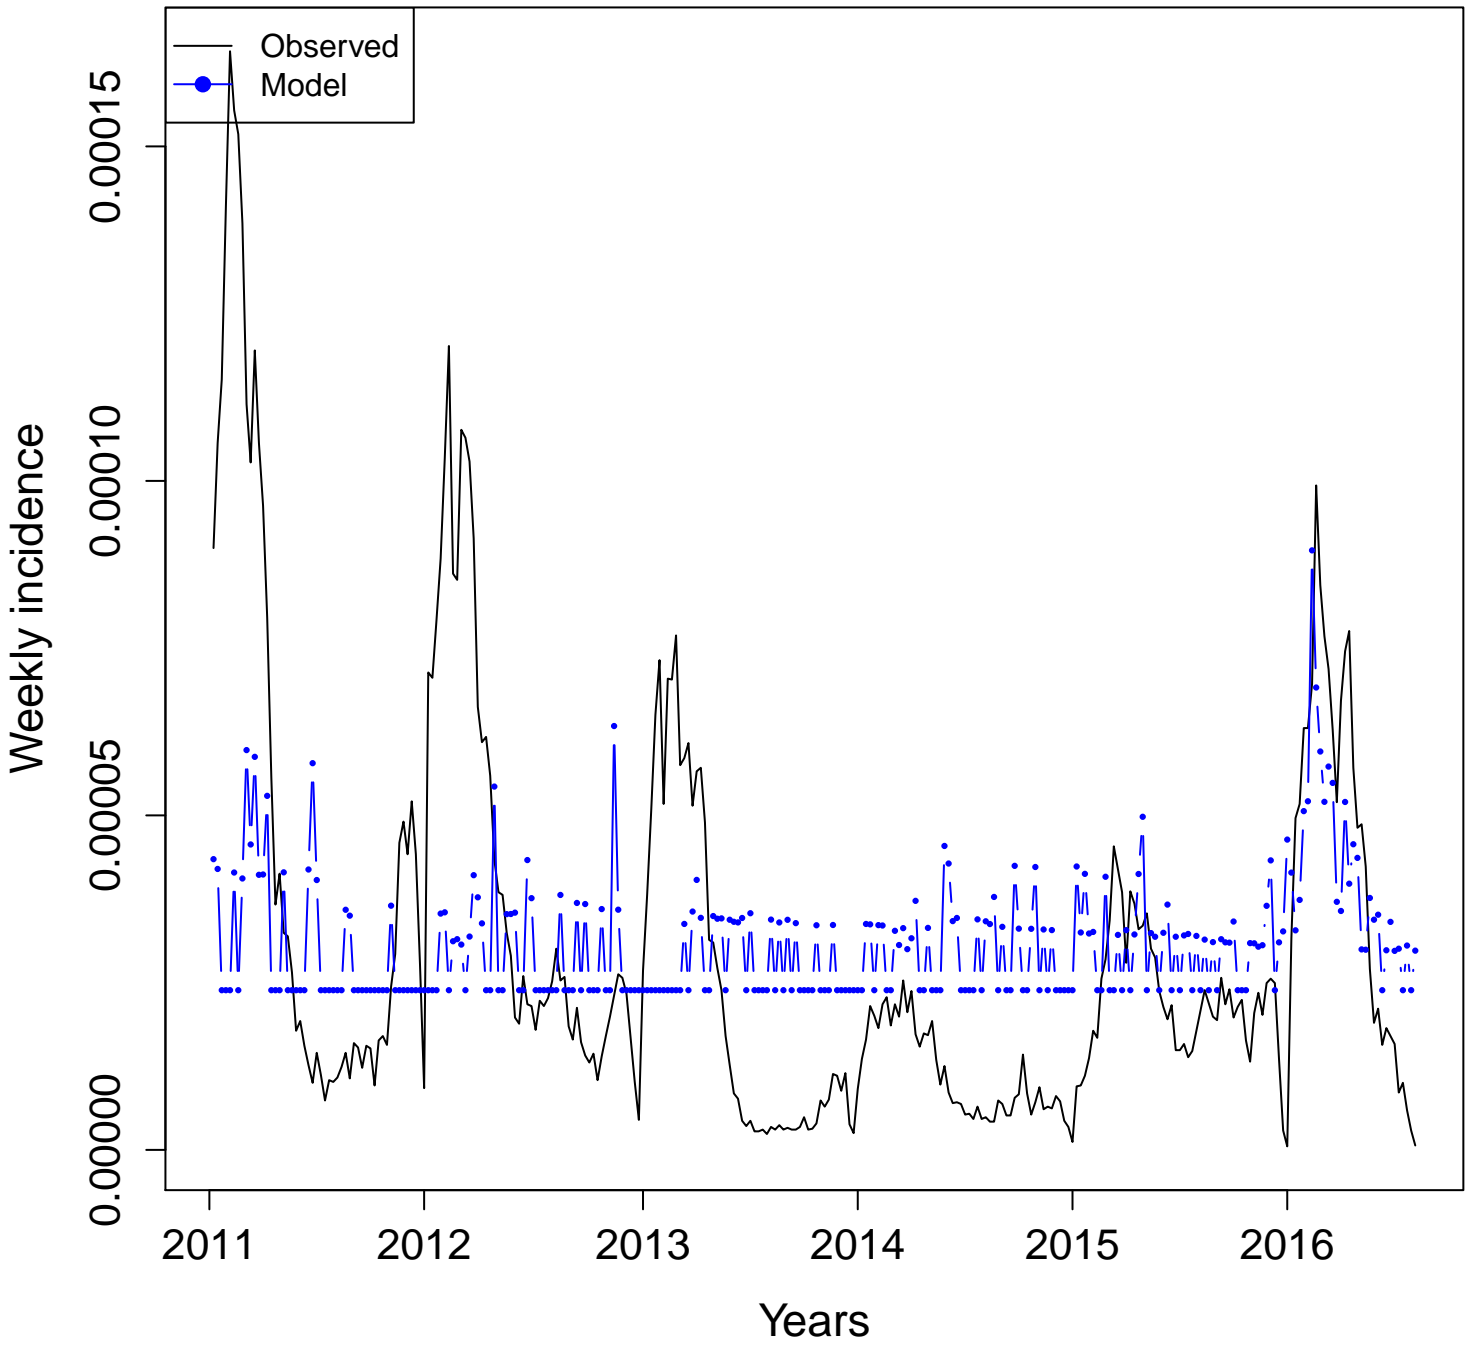

**PA- mosquito.dengue**  
**Adj. R squared = 0.1801**

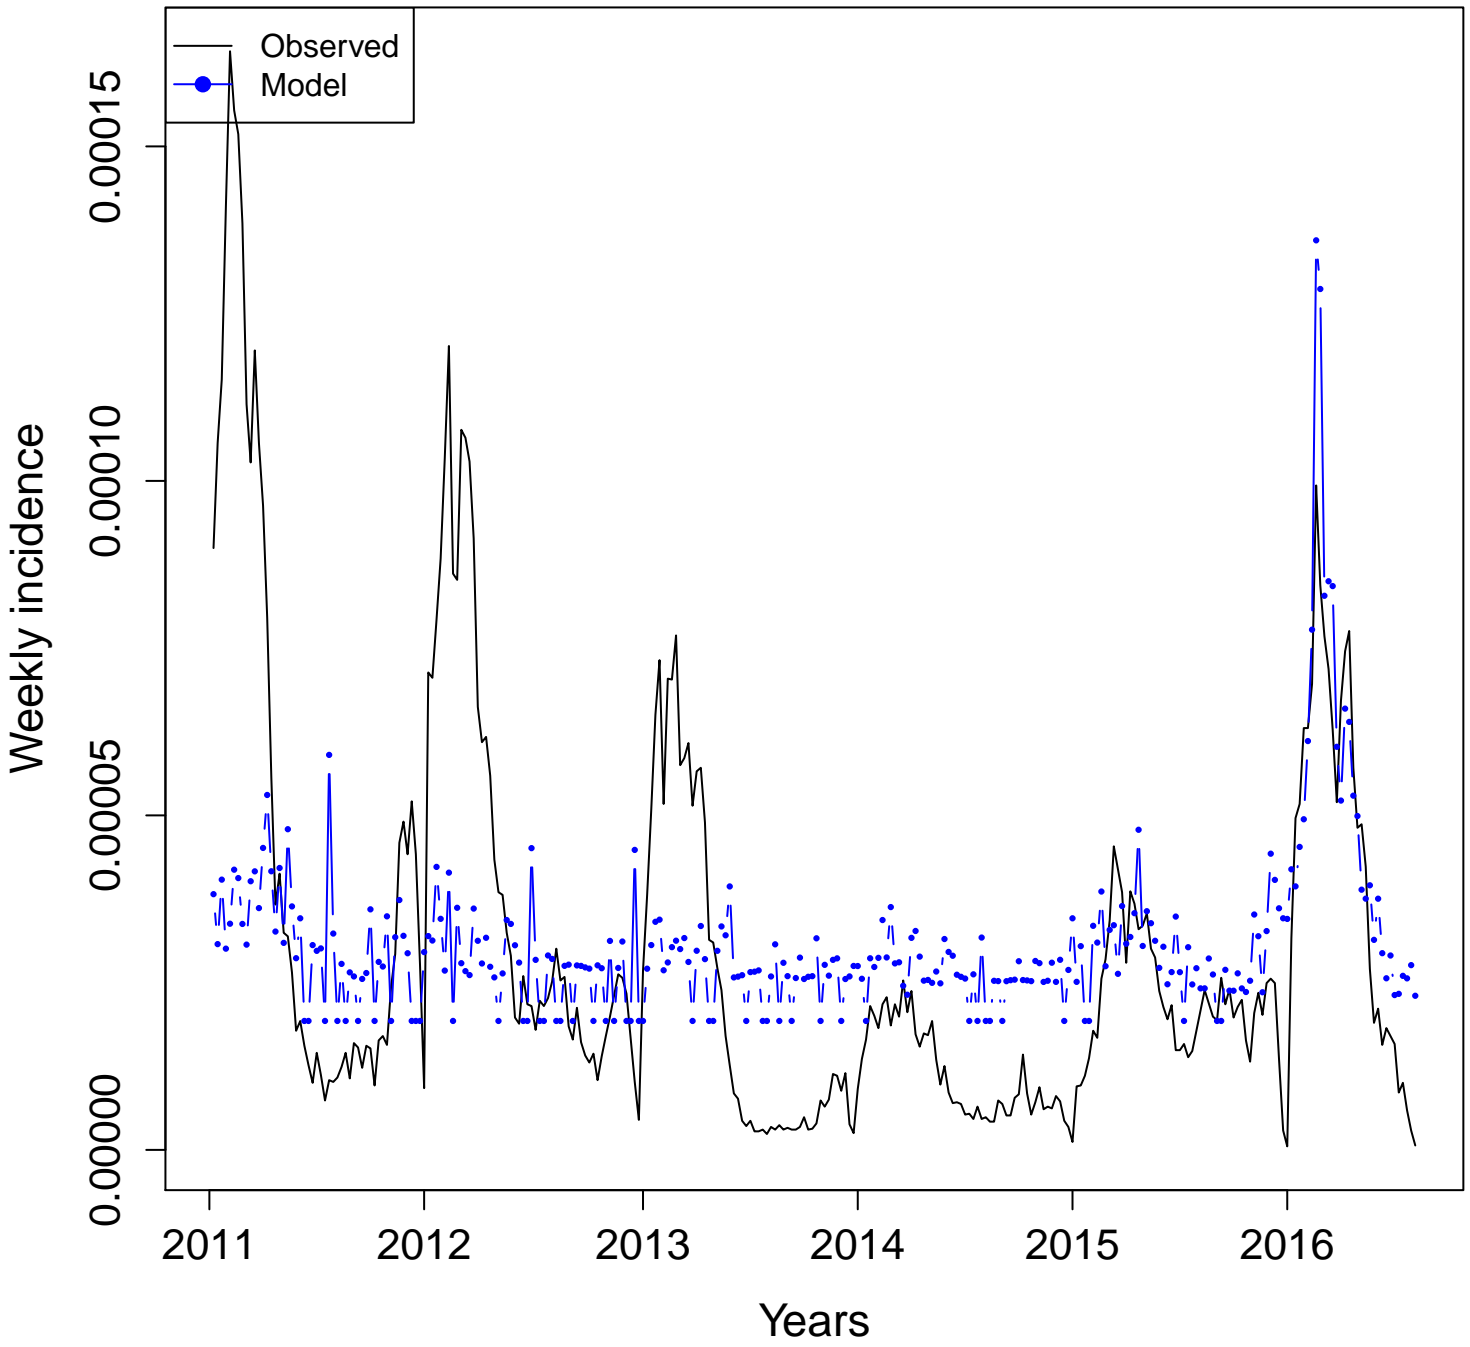



# PA- mosquito

Adj. R squared = 0.1152

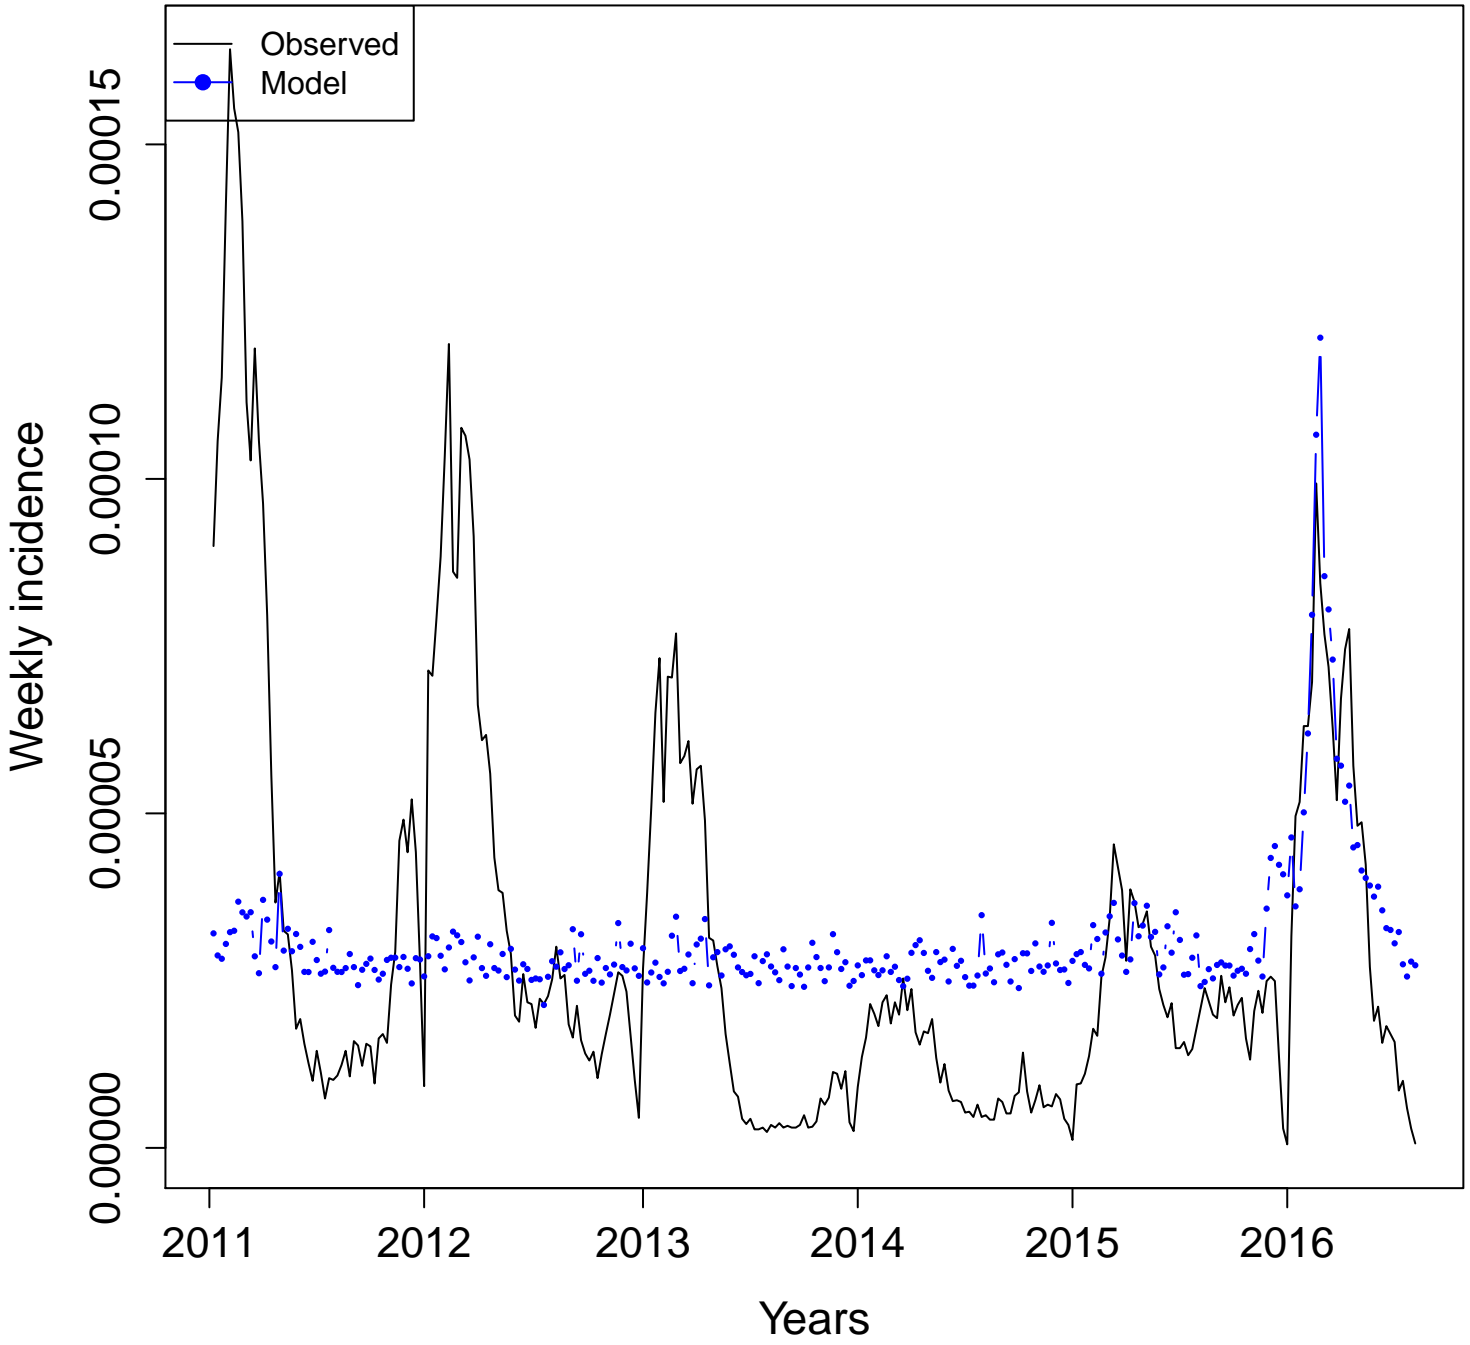

**PA- sintomas.da.dengue**  
**Adj. R squared = 0.2782**

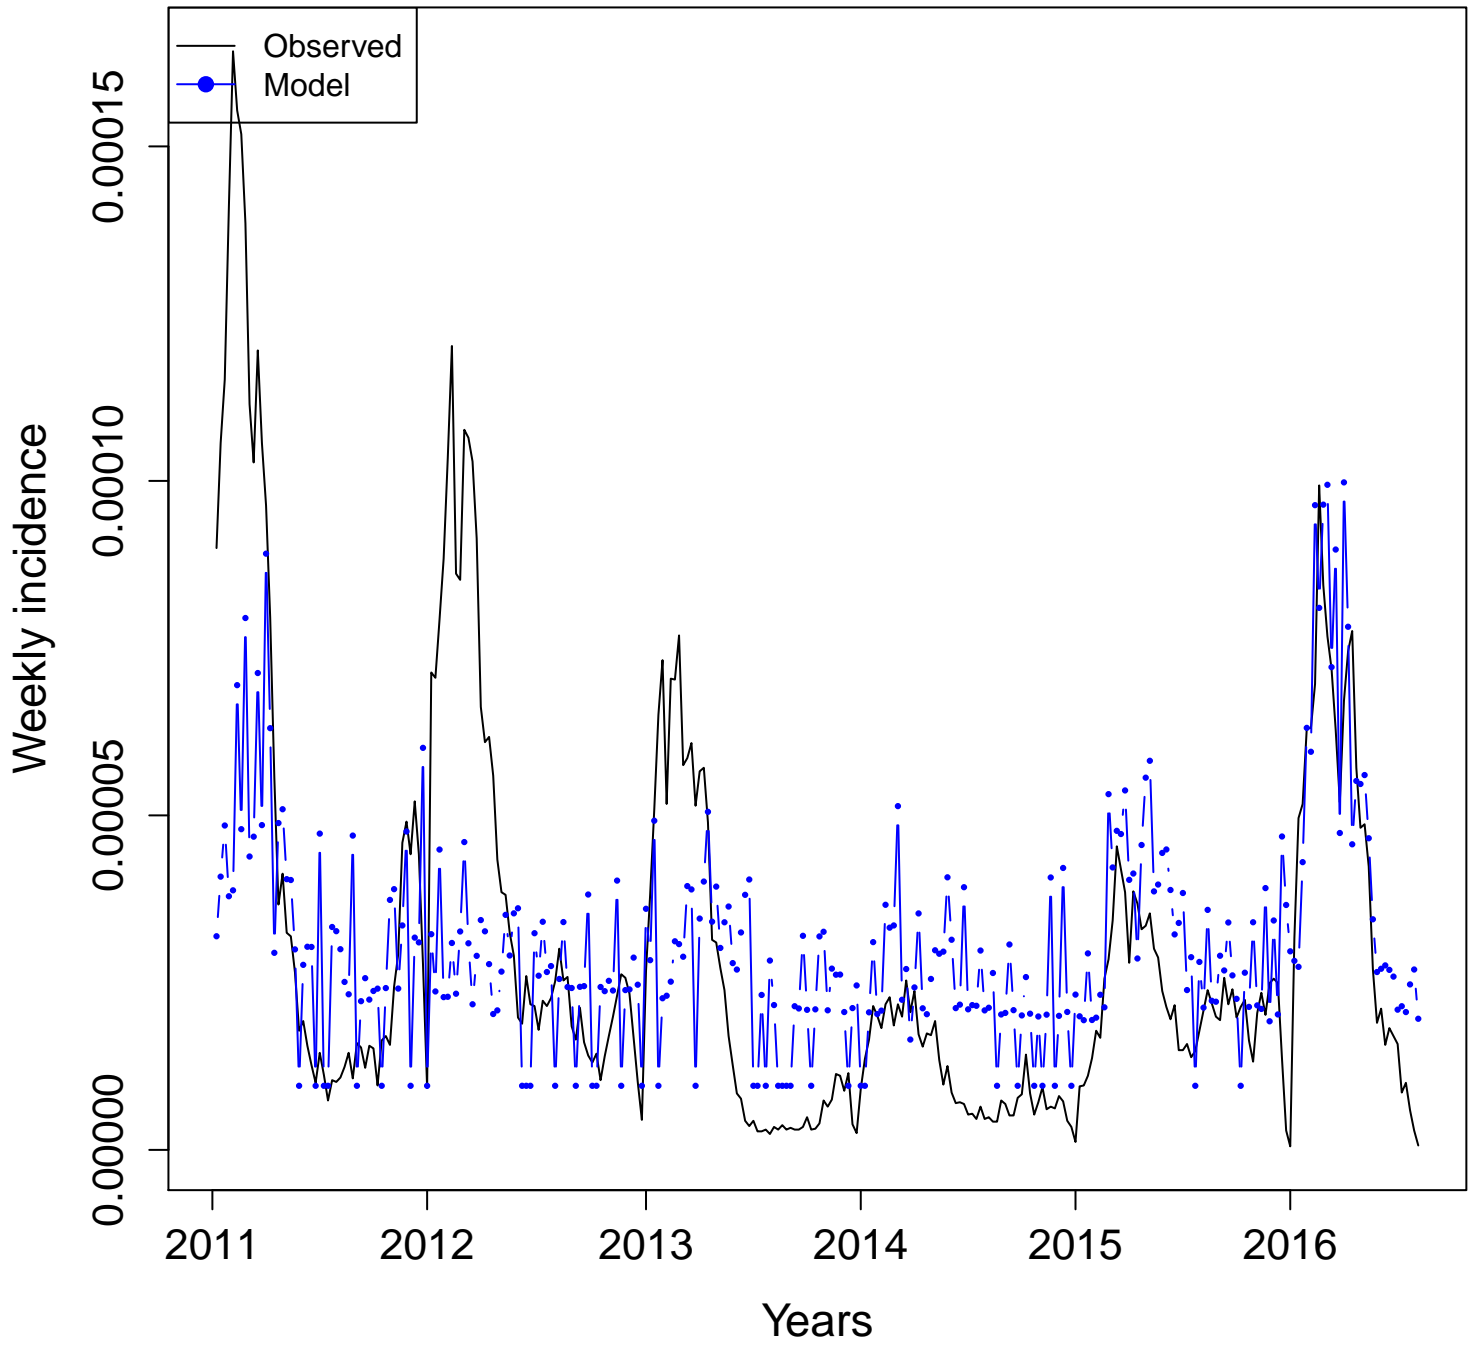

## Paraiba (PB)

# Dengue incidence vs. Google Health Trends (2011–2016)

### Definitions:

- **Combined terms:**
  - **All:** model with all the available terms.  $n$  = number of terms
  - **Four:** model with "dengue", "dengue sintomas", "aedes", and "mosquito".
  - **Uncorrelated:** model with non-correlated terms.  $n$  = number of uncorrelated terms
- **Individual terms:** Plots developed with one term at a time.
- Terms for all and uncorrelated models can be found in additional file 3.

**Combined terms  
Adjusted R squared**

**Paraiba (PB)**

**All**  
**(n = 10)**

**BR-PB**  
**Adj. R squared = 0.8372**

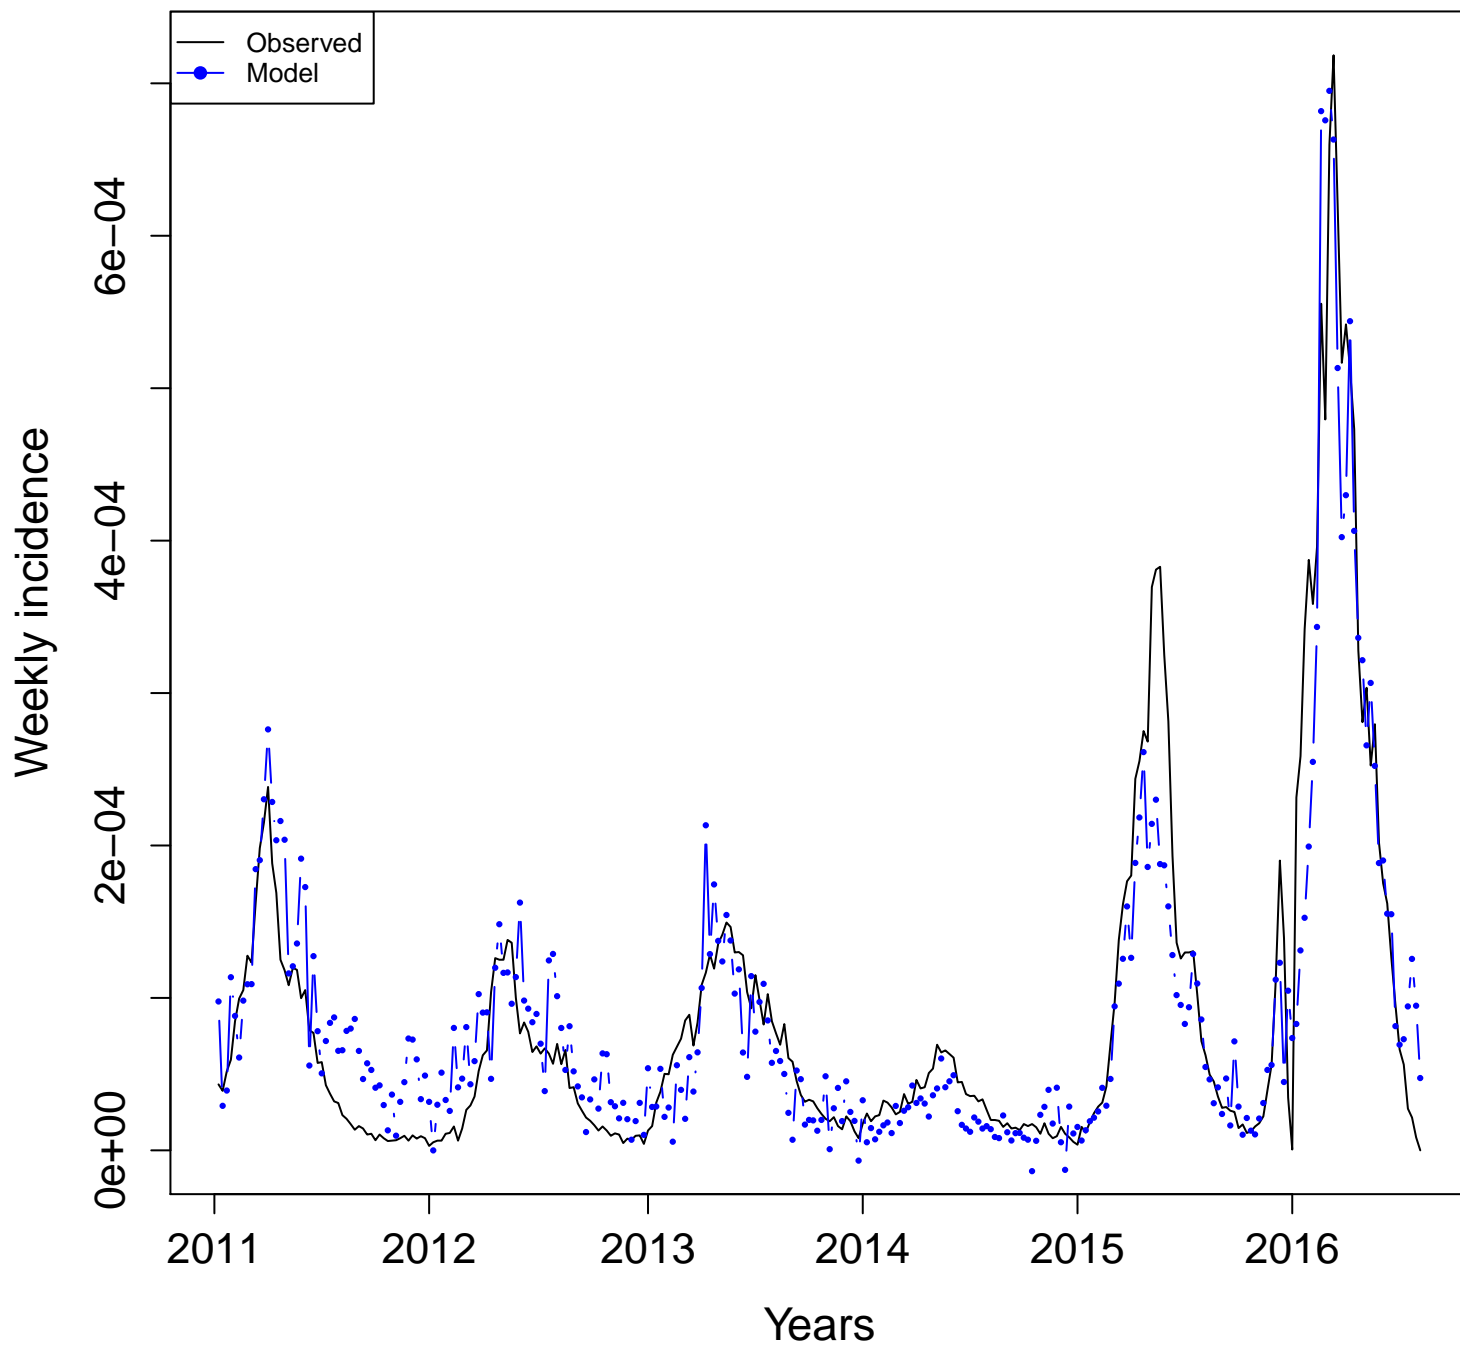

**BR-PB**  
**Adj. R squared = 0.832**

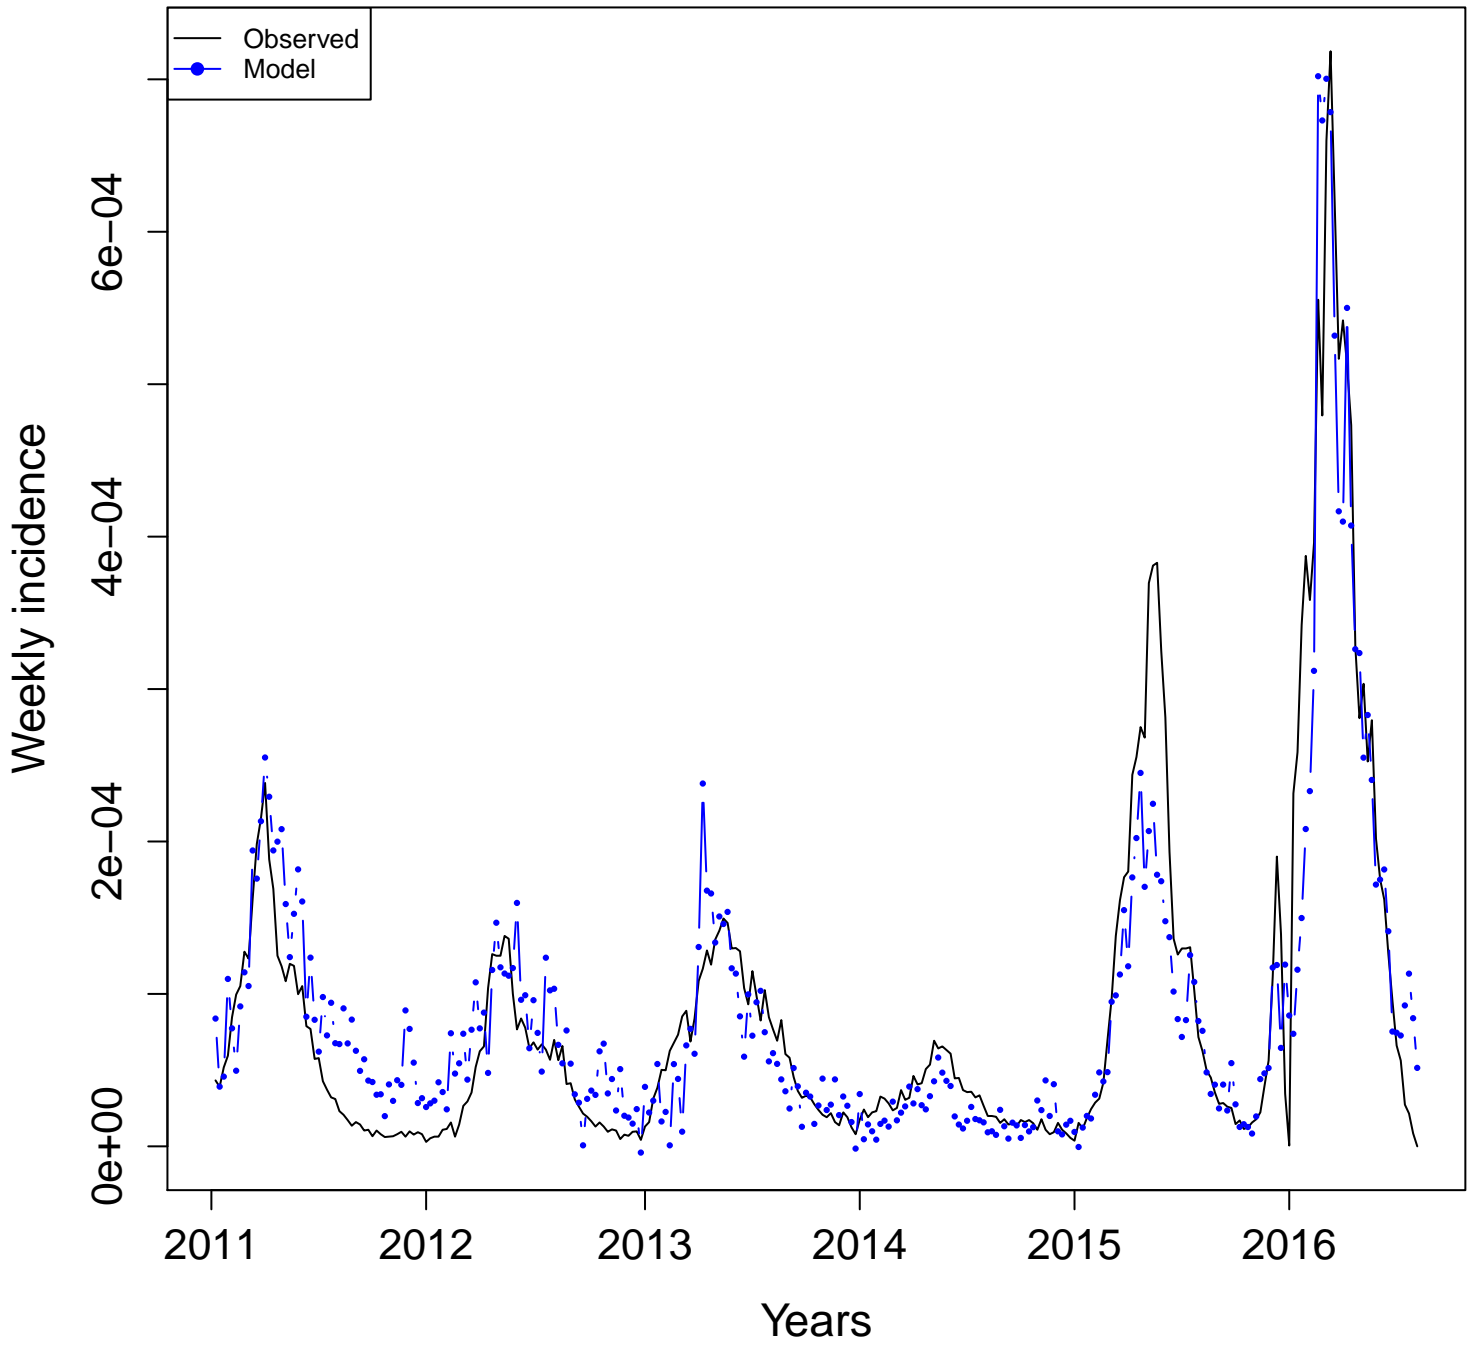

**Uncorrelated  
(n = 3)**

**BR-PB  
Adj. R squared = 0.6825**

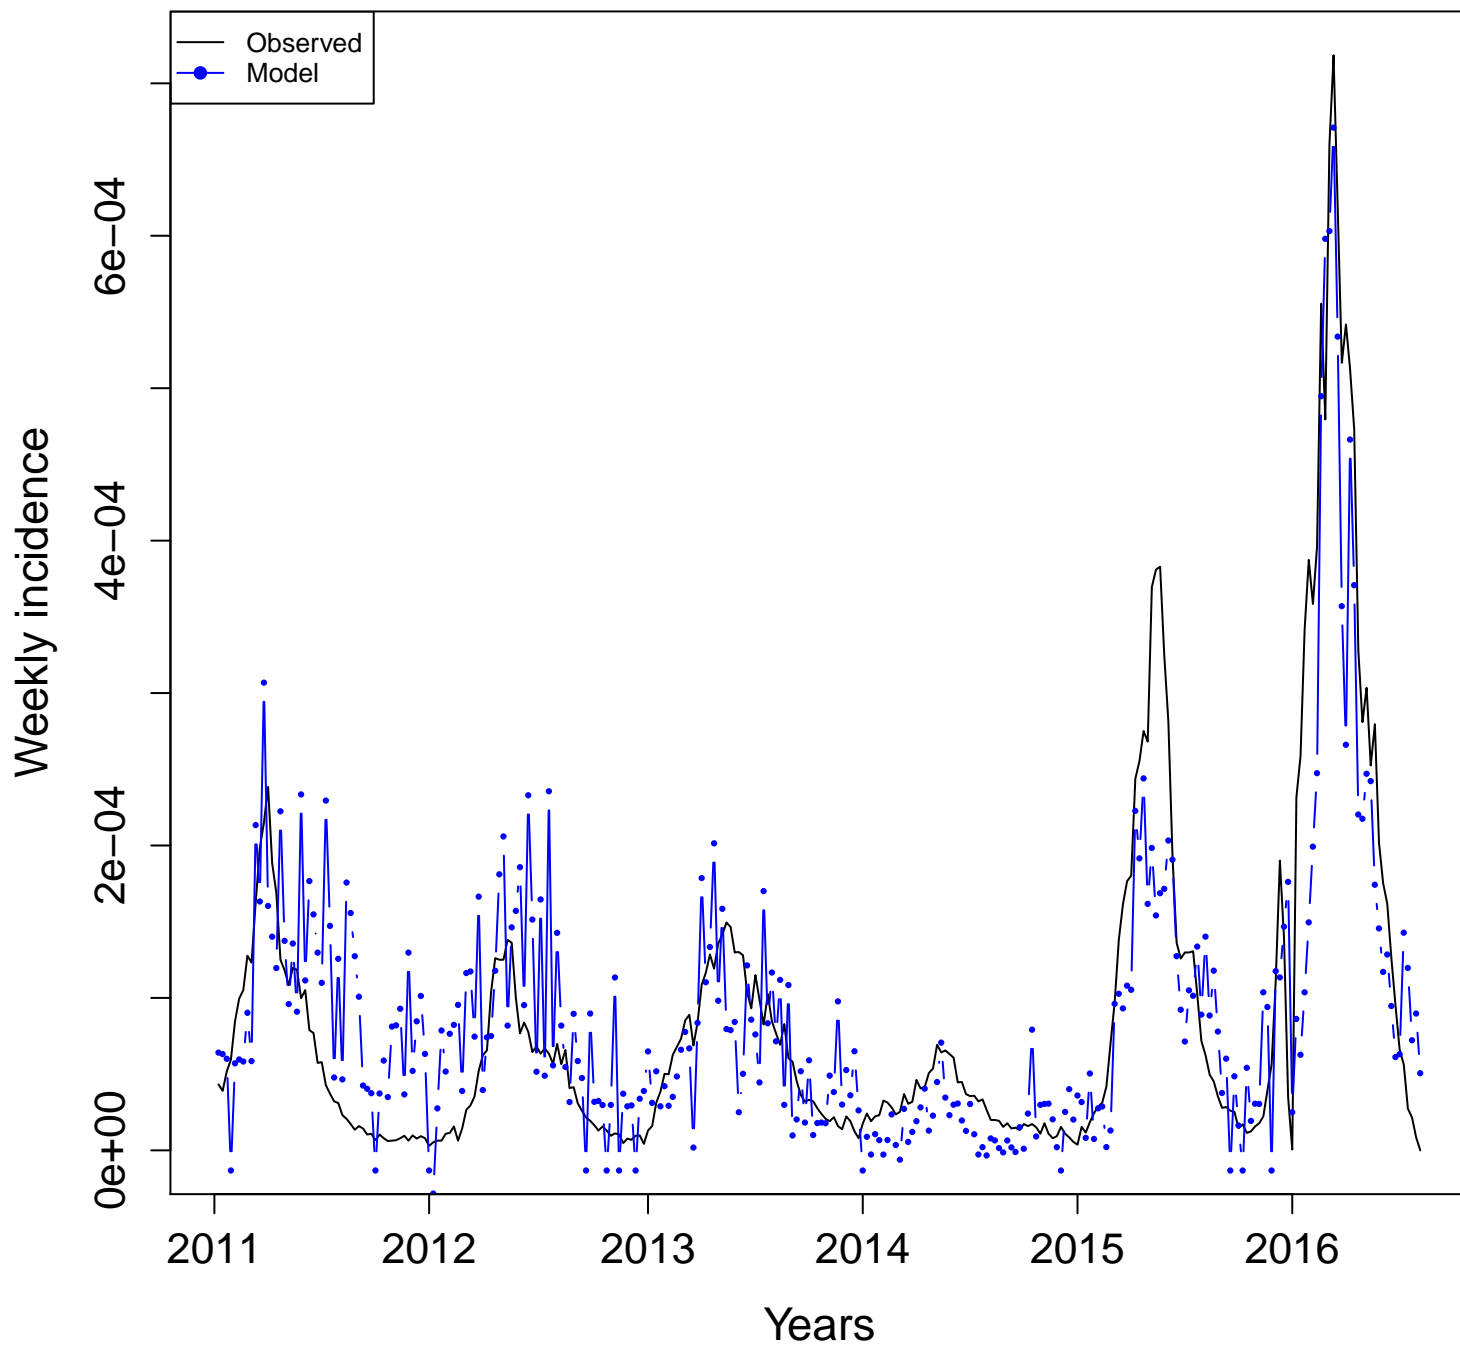

**Individual terms**  
**Adjusted R squared**

**Paraiba (PB)**



**PB- aedes.aegypti**  
**Adj. R squared = 0.6334**

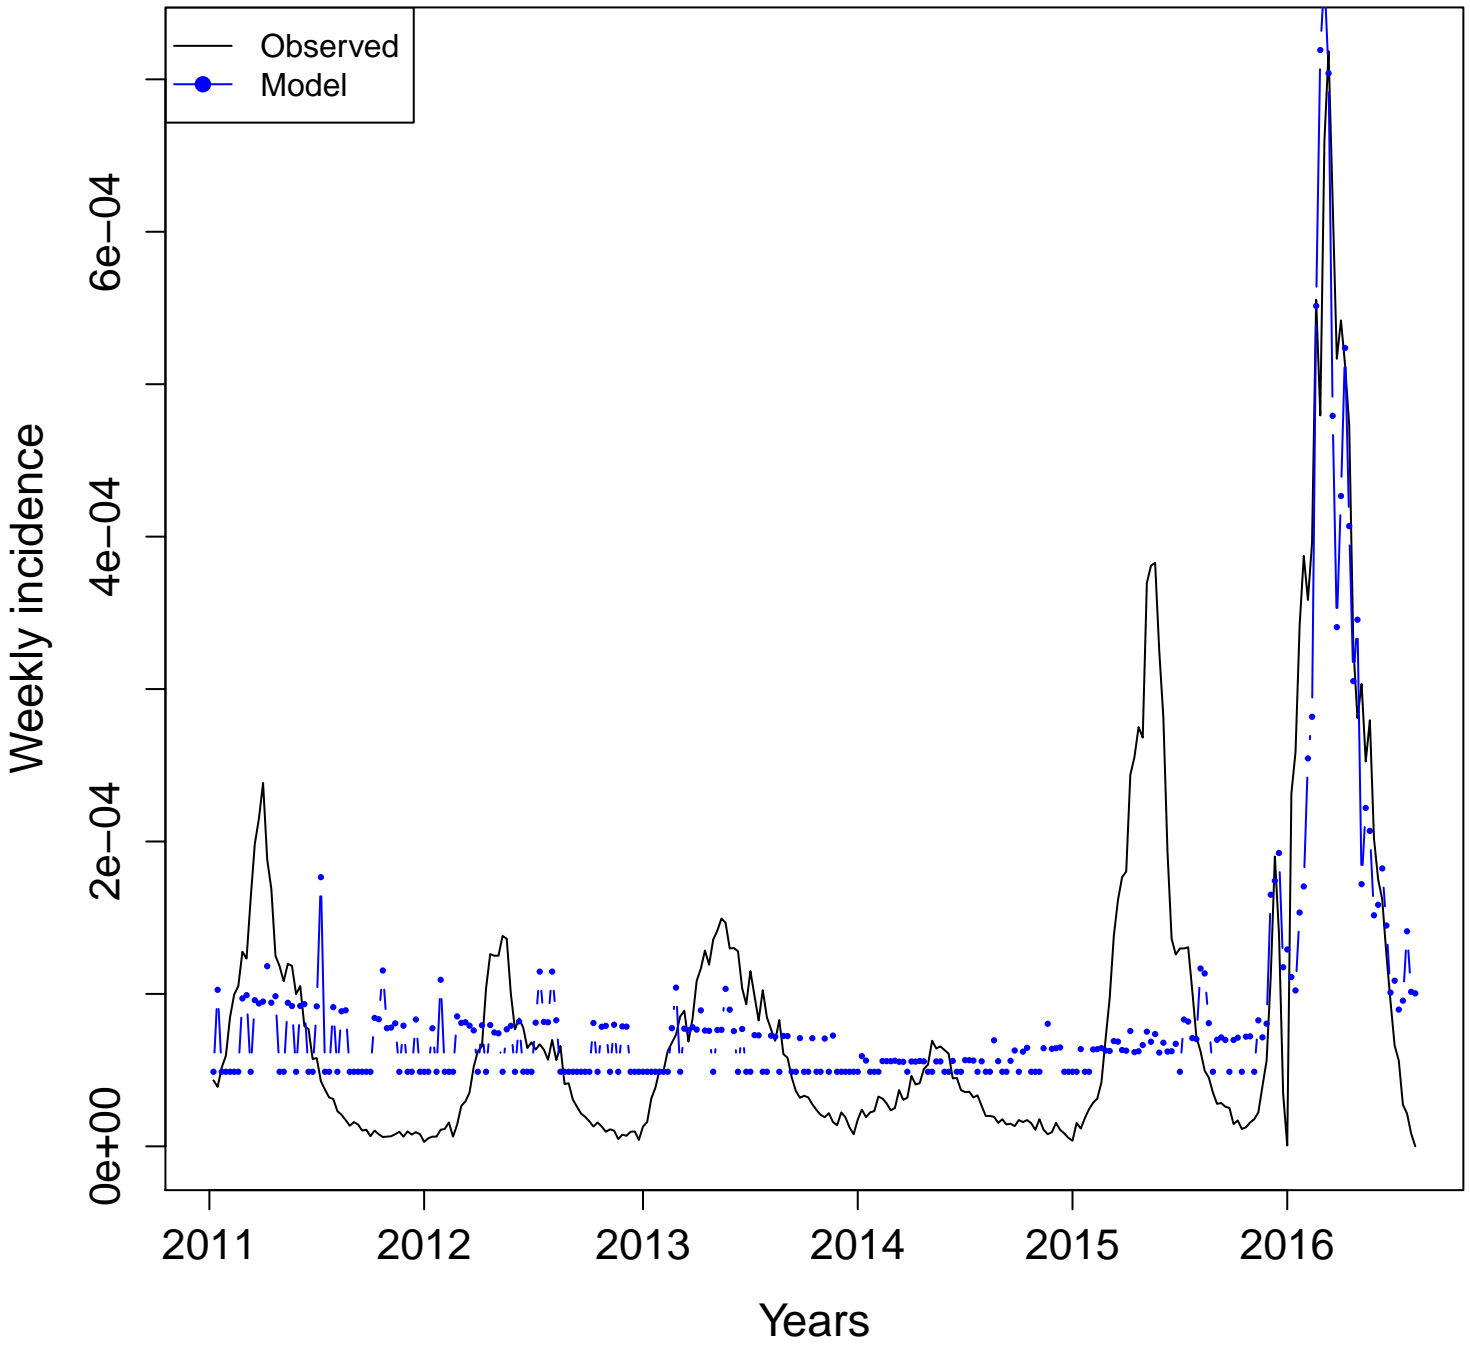

**PB- aedes**  
**Adj. R squared = 0.6295**

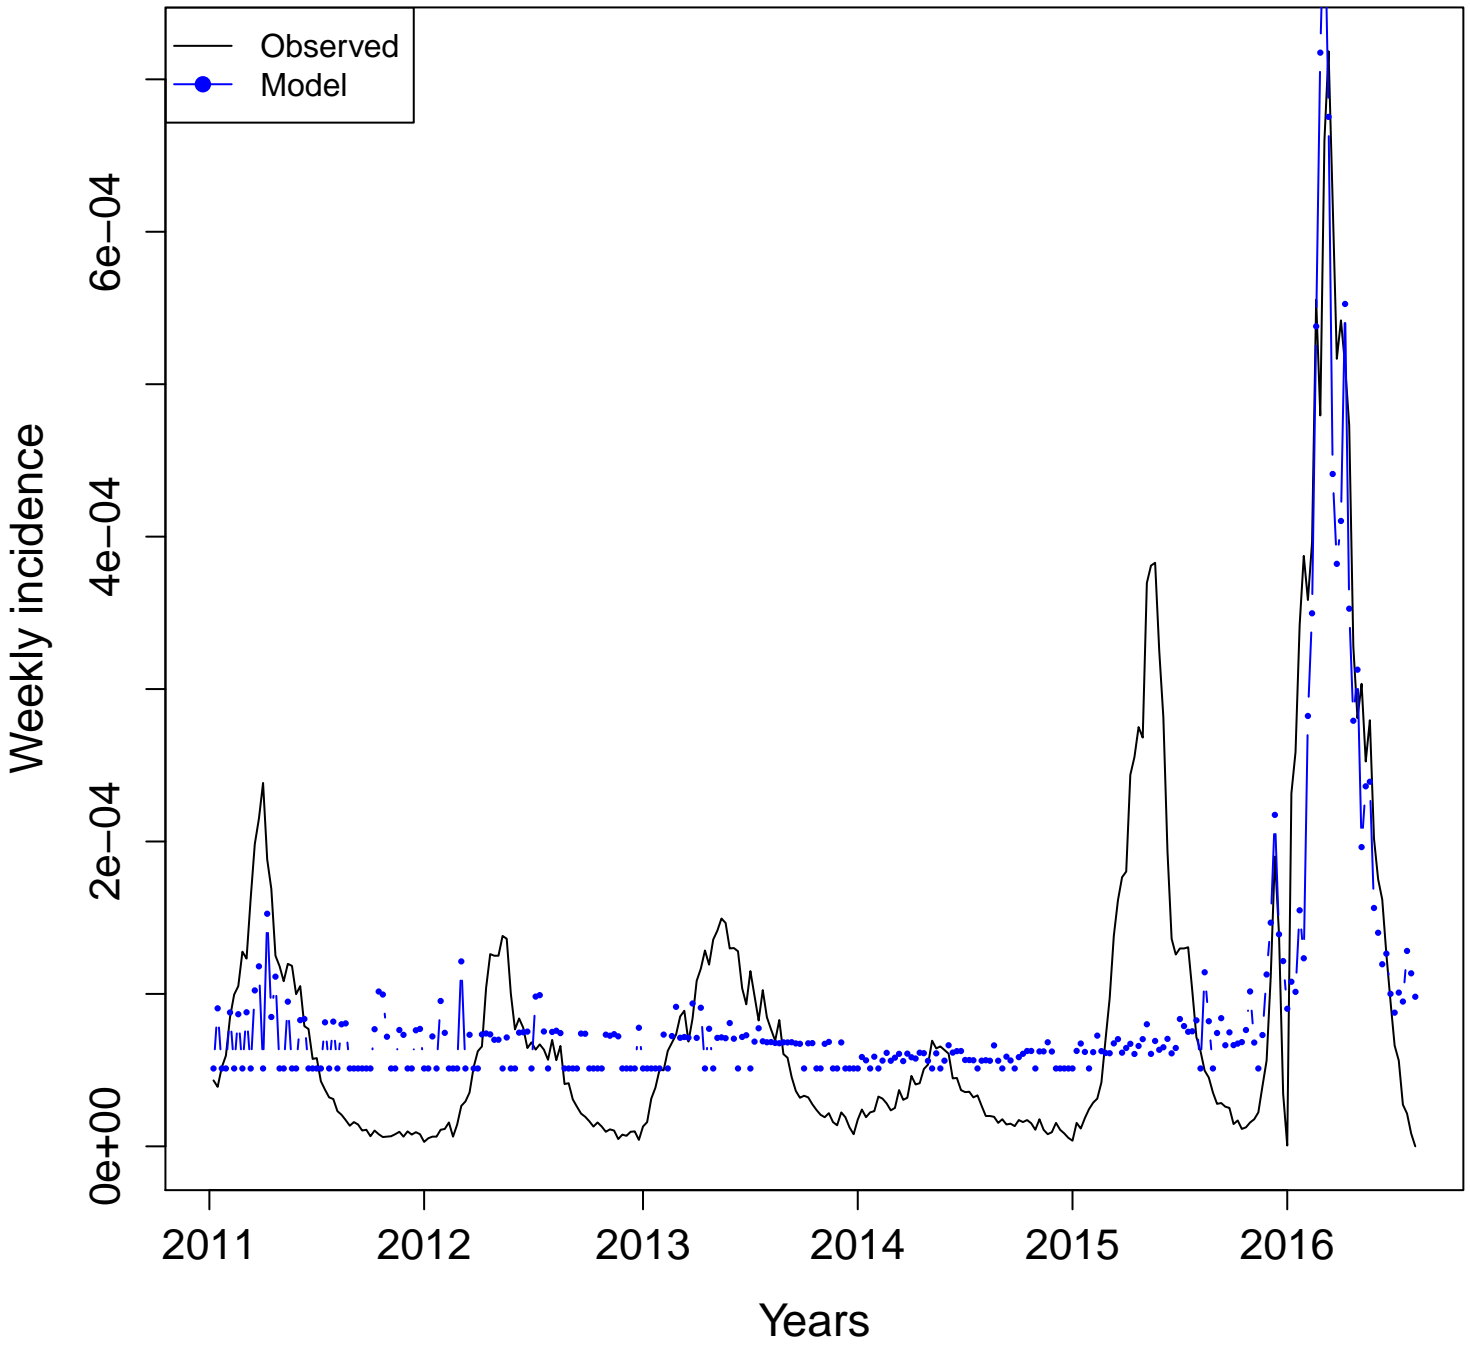

**PB- aegypti**  
**Adj. R squared = 0.634**

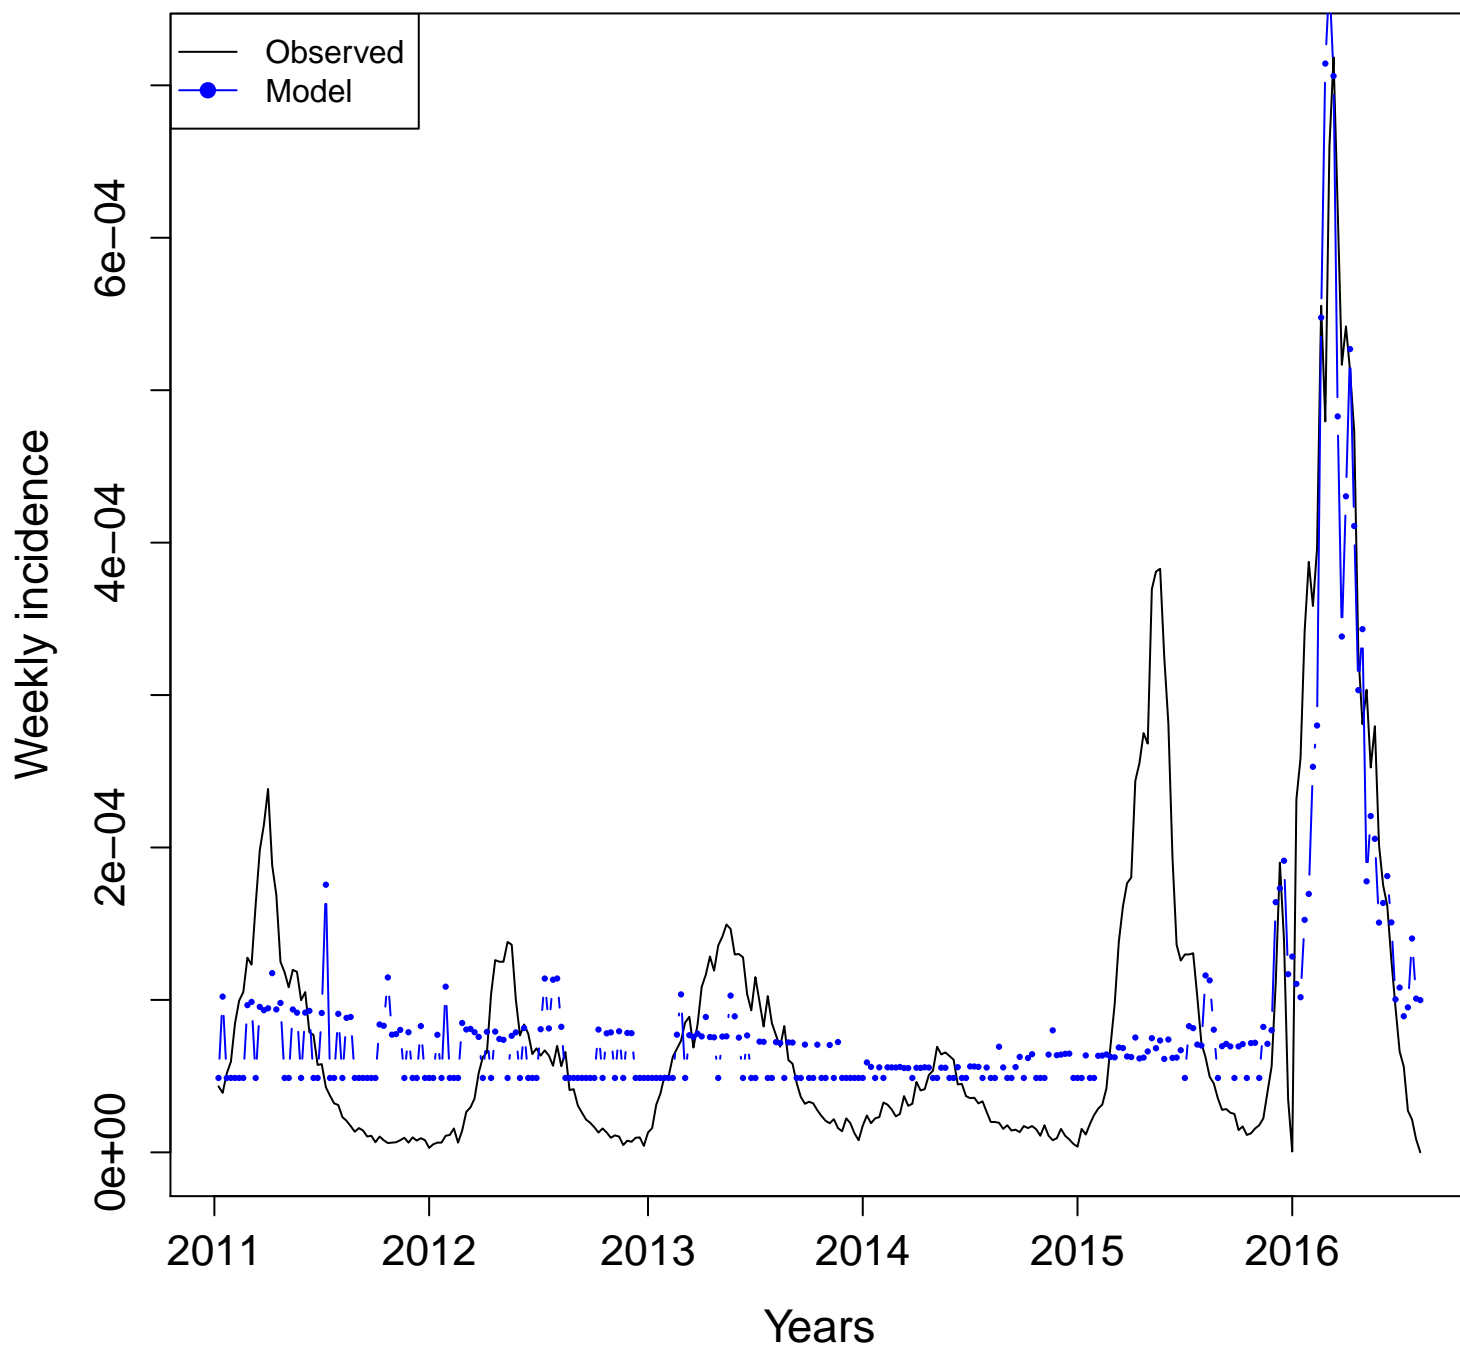

**PB- dengue.fever**  
**Adj. R squared = -0.0034**

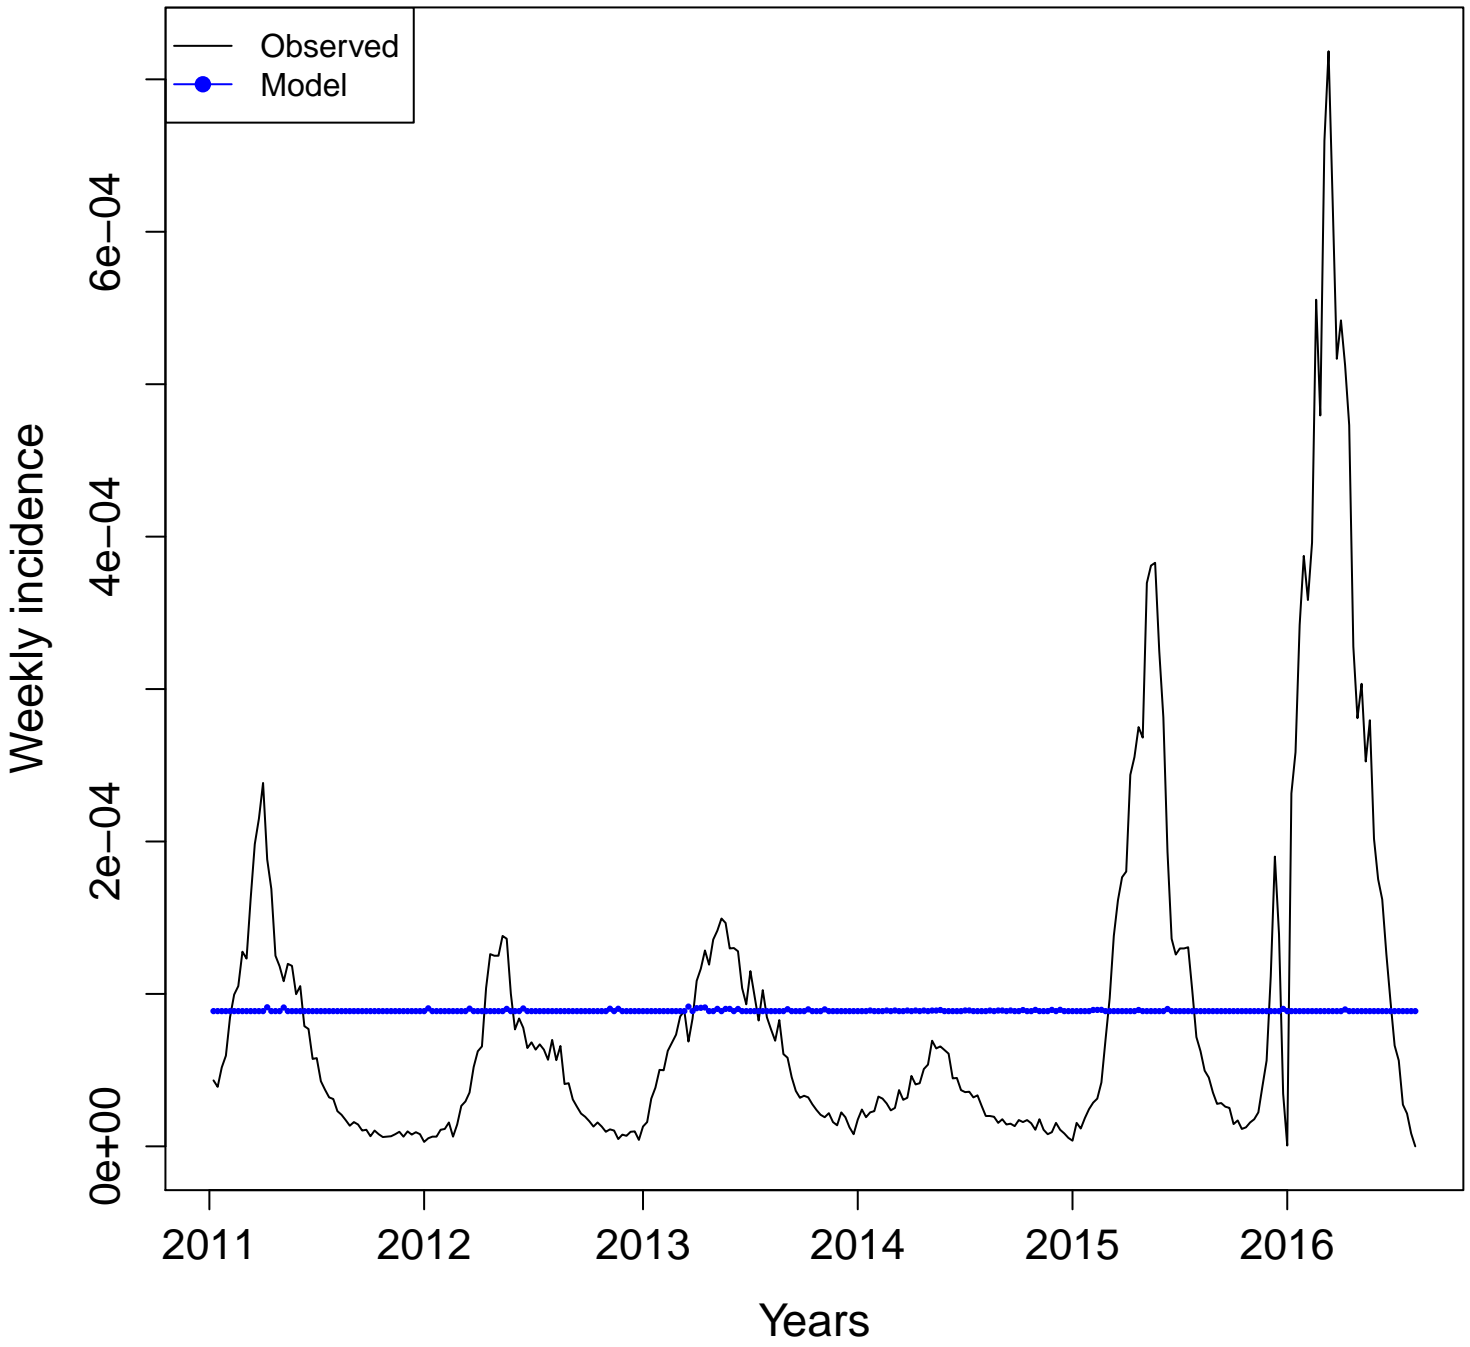

**PB- dengue**  
**Adj. R squared = 0.811**

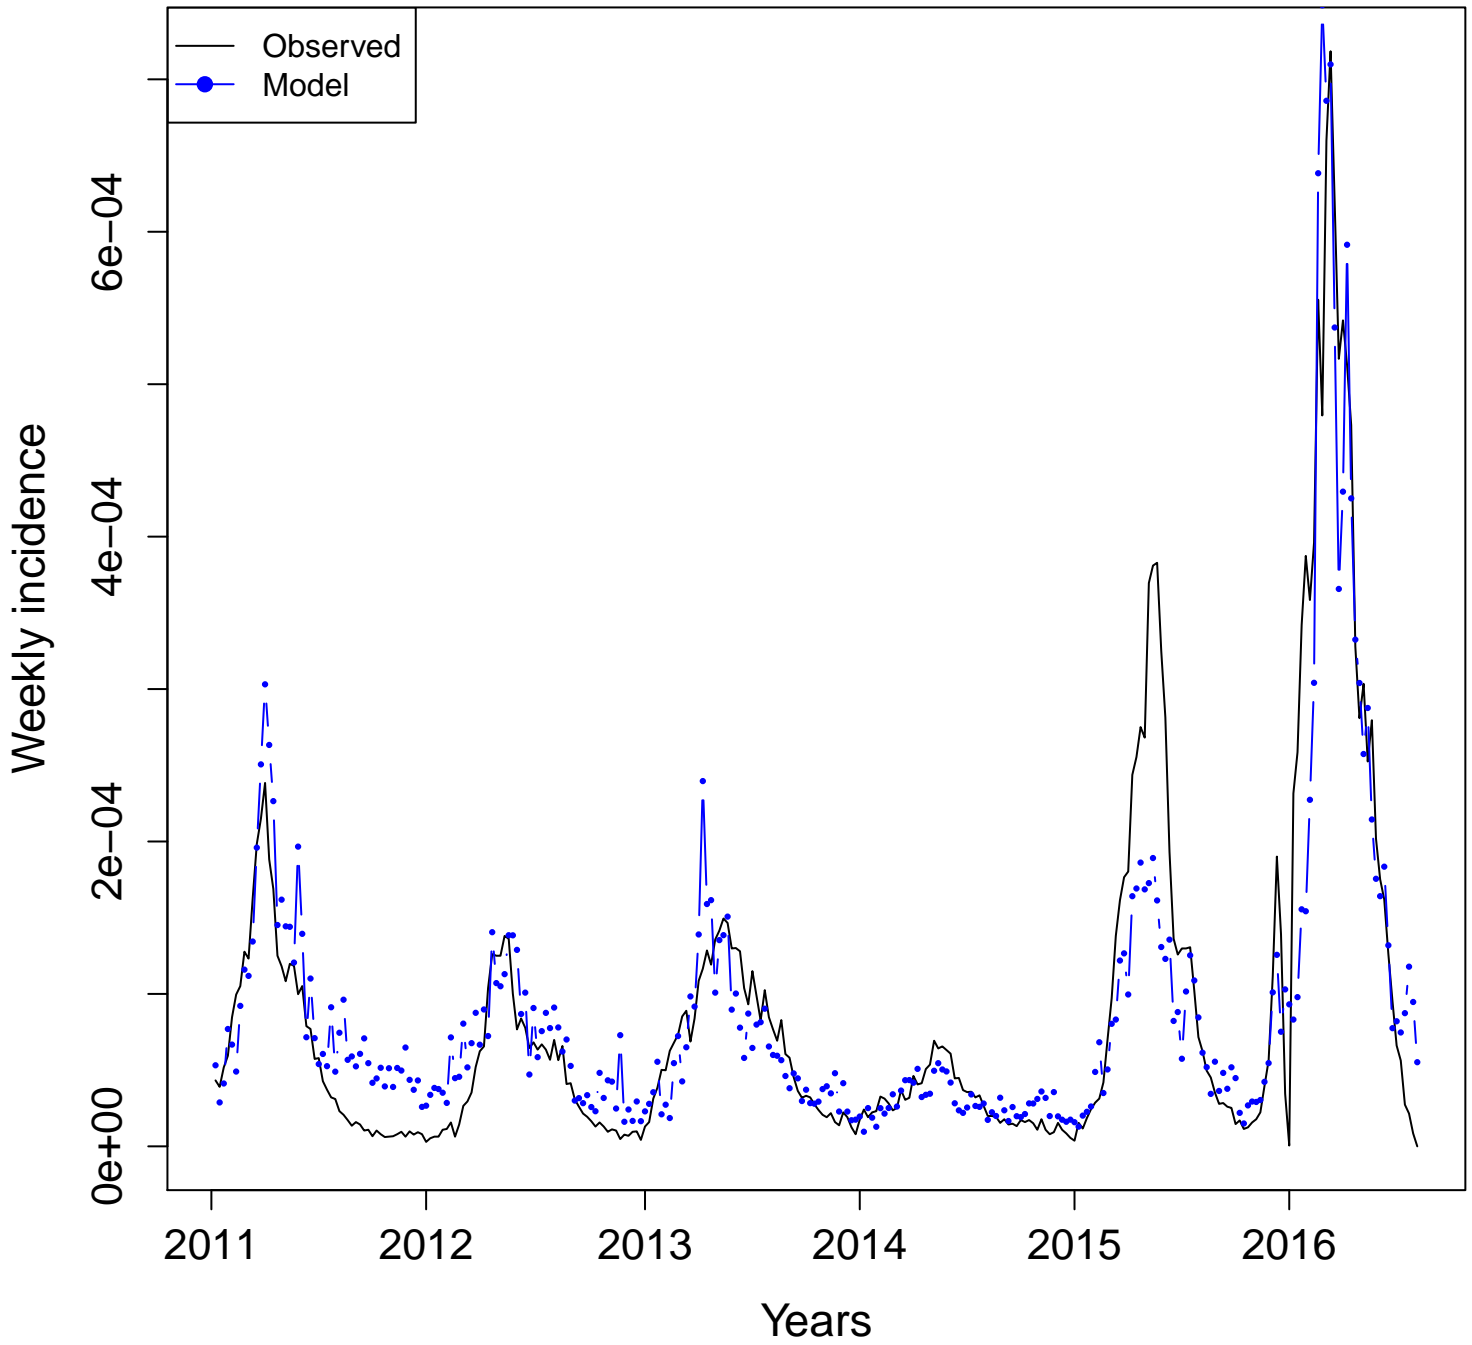

**PB- dengue.sintomas**  
**Adj. R squared = 0.7197**

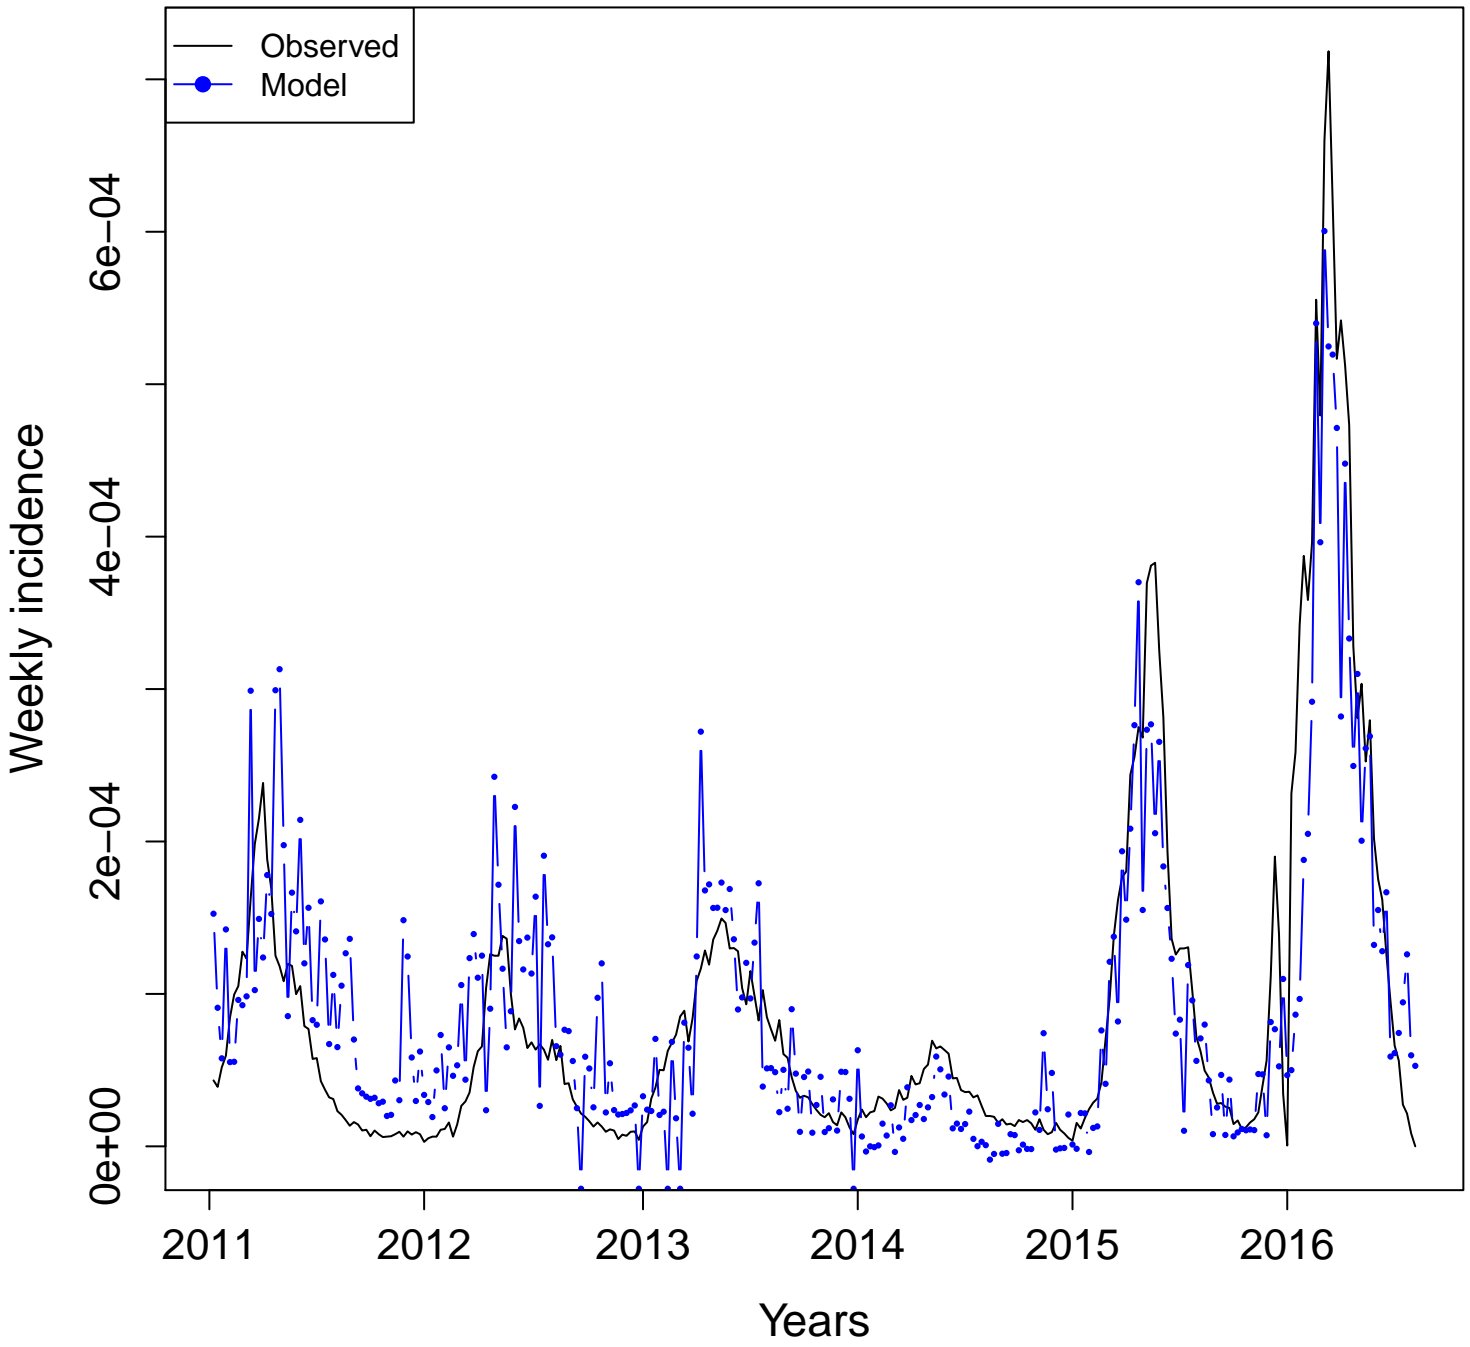

# PB- dengue.virus

Adj. R squared = 0.5352

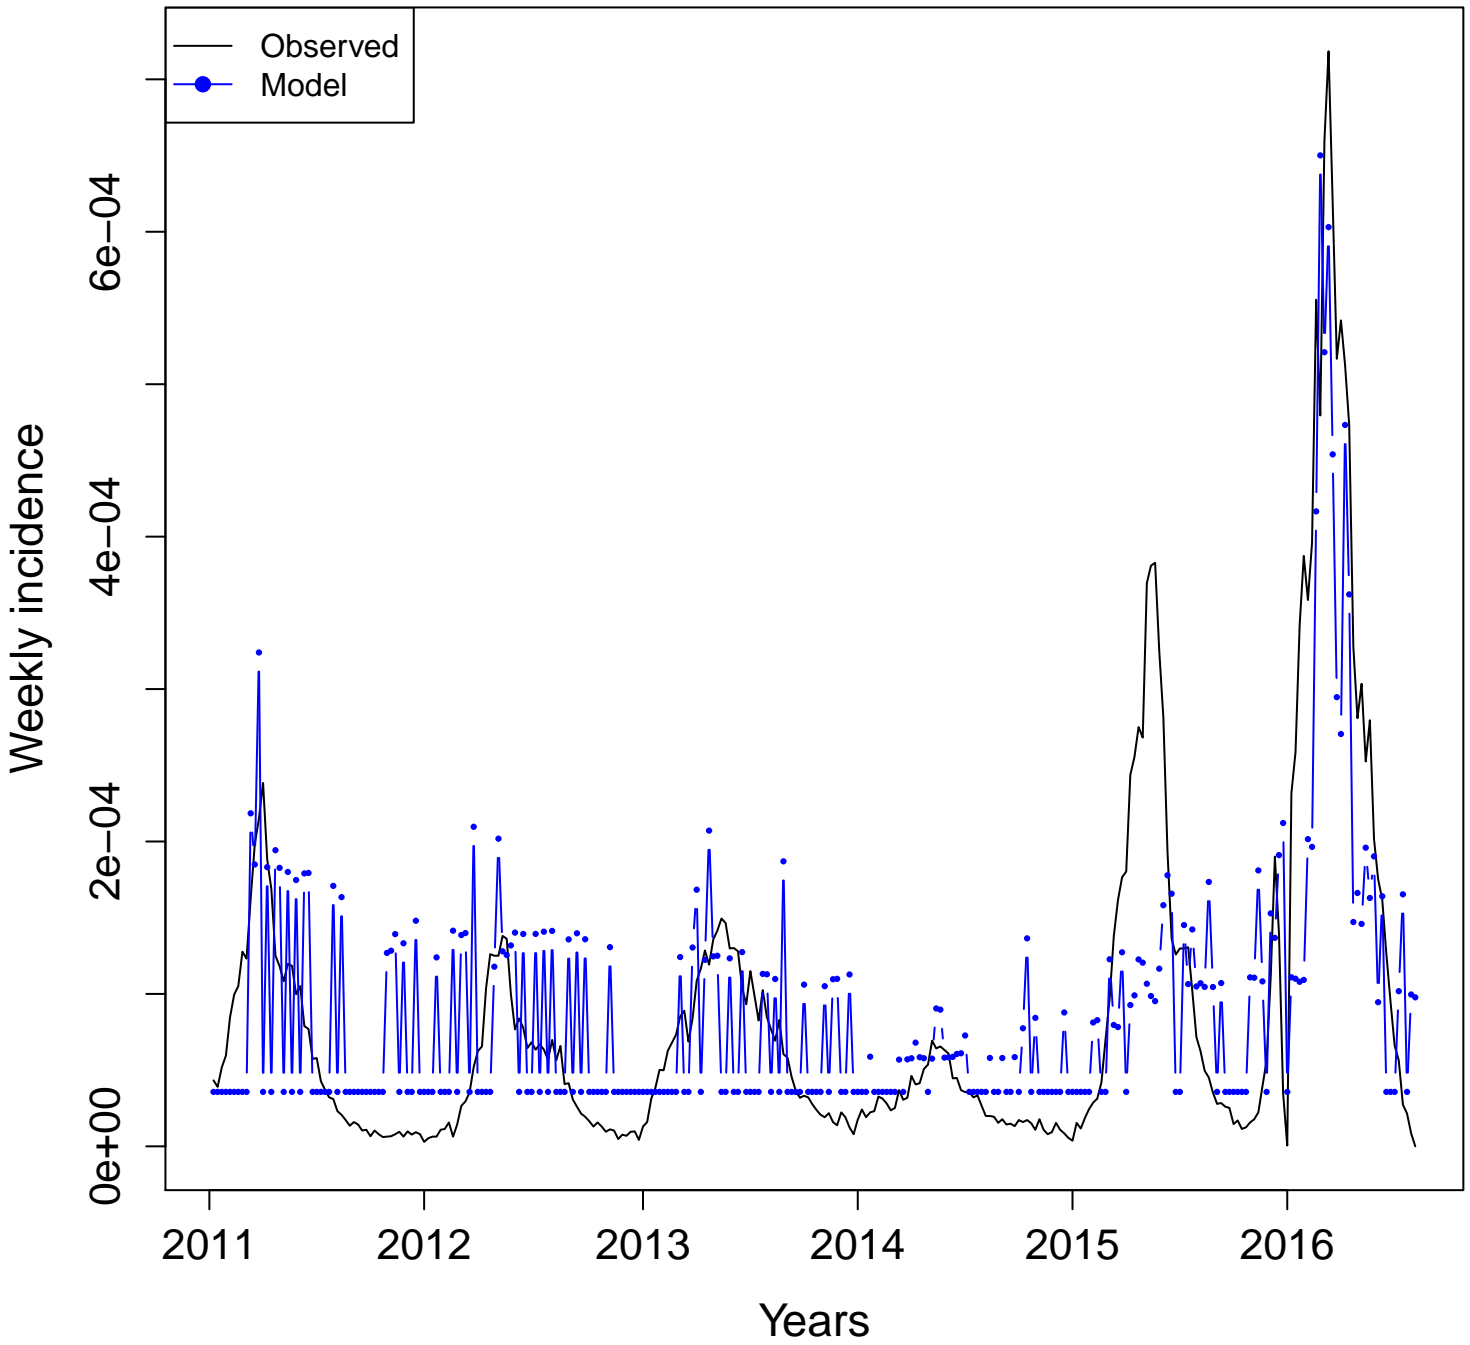

**PB- mosquito.dengue**  
**Adj. R squared = 0.6792**

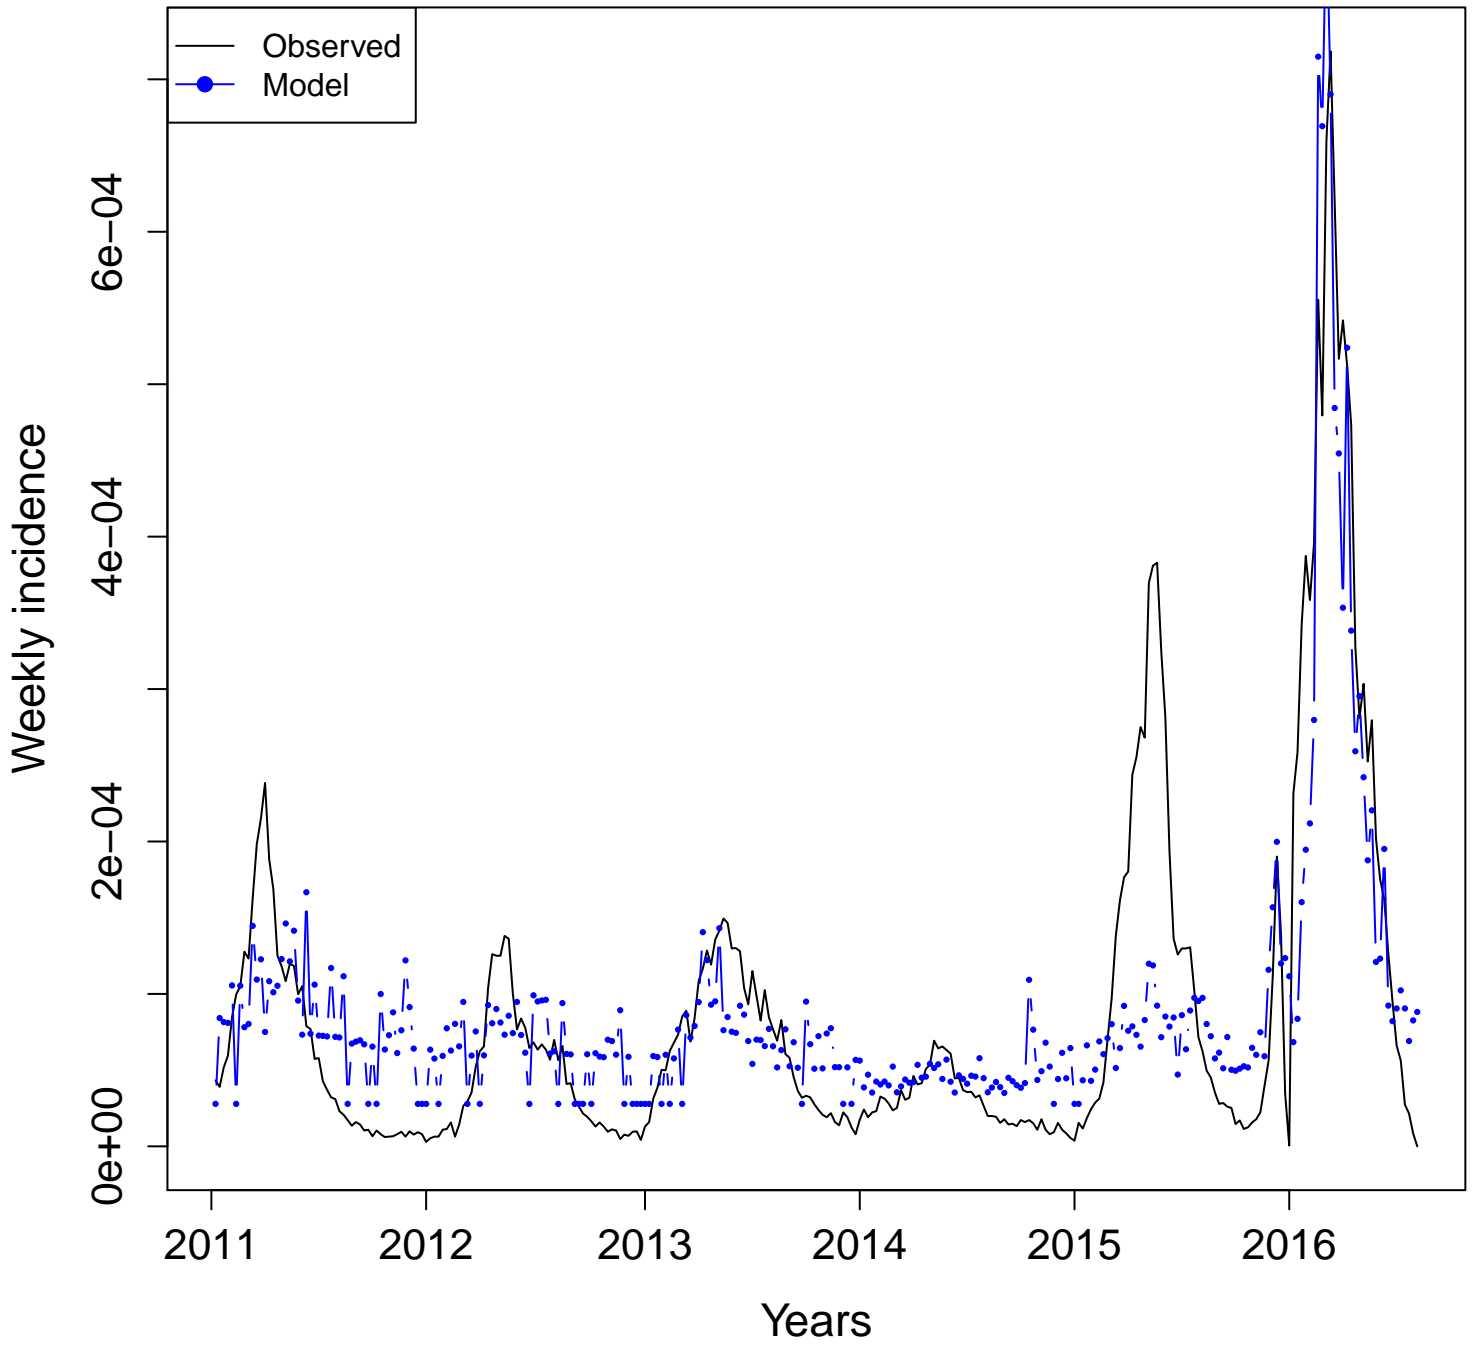



# PB- mosquito

Adj. R squared = 0.7024

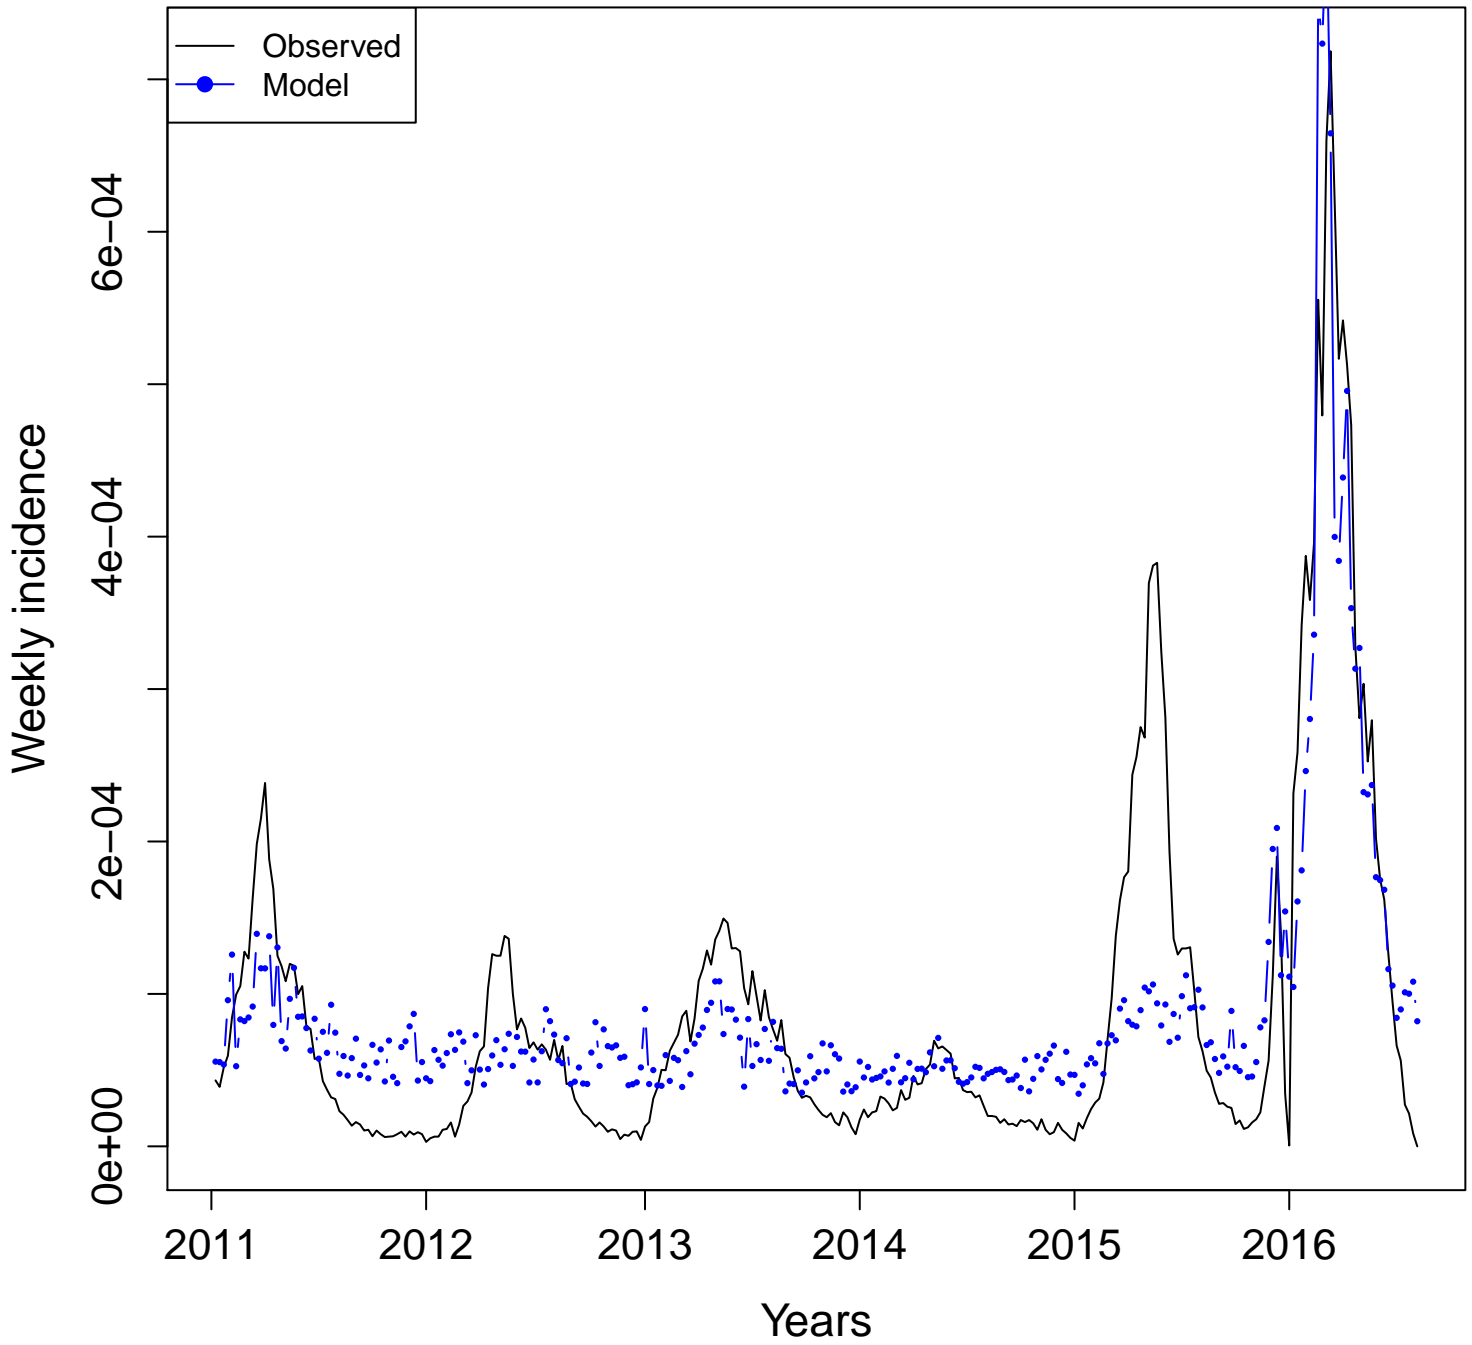

**PB- sintomas.da.dengue**  
**Adj. R squared = 0.5705**

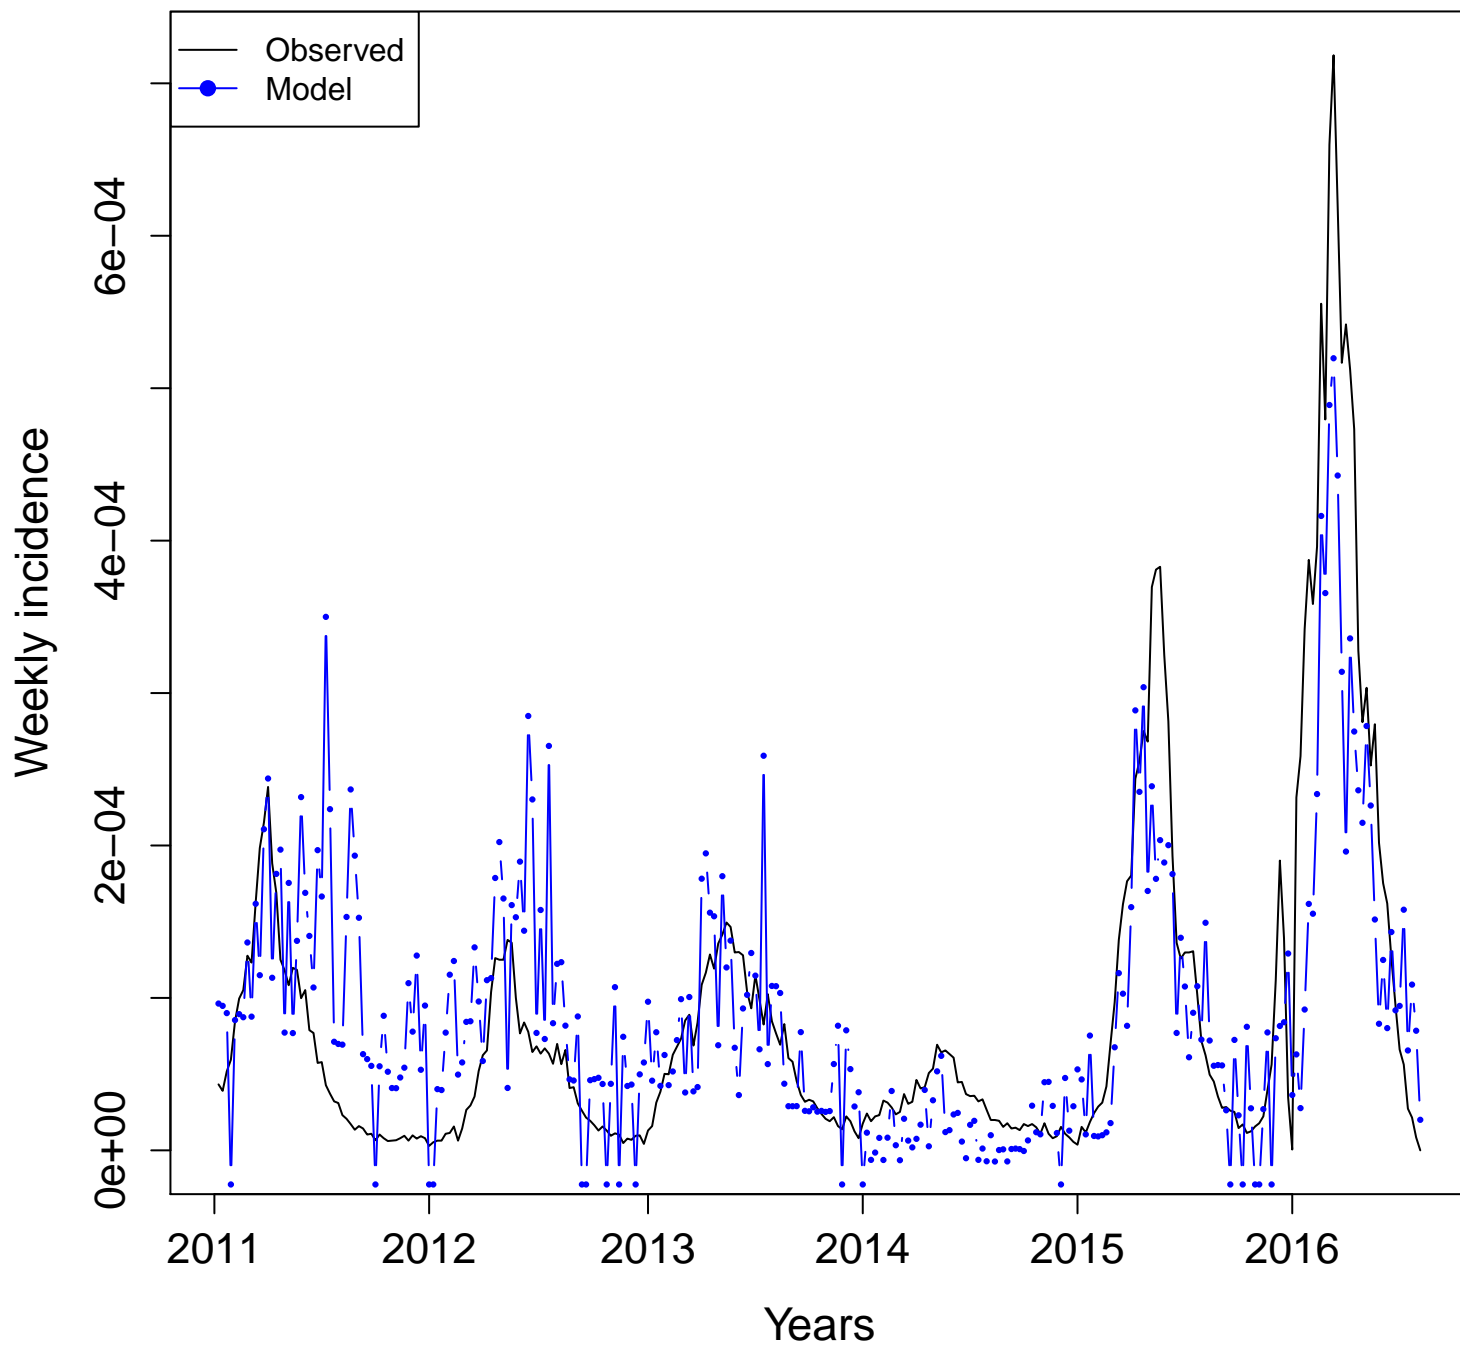

## Pernambuco (PE)

# Dengue incidence vs. Google Health Trends (2011–2016)

### Definitions:

- **Combined terms:**
  - **All:** model with all the available terms.  $n$  = number of terms
  - **Four:** model with "dengue", "dengue sintomas", "aedes", and "mosquito".
  - **Uncorrelated:** model with non-correlated terms.  $n$  = number of uncorrelated terms
- **Individual terms:** Plots developed with one term at a time.
- Terms for all and uncorrelated models can be found in additional file 3.

**Combined terms**  
**Adjusted R squared**

**Pernambuco (PE)**

**All**  
**(n = 10)**

**BR-PE**  
**Adj. R squared = 0.8191**

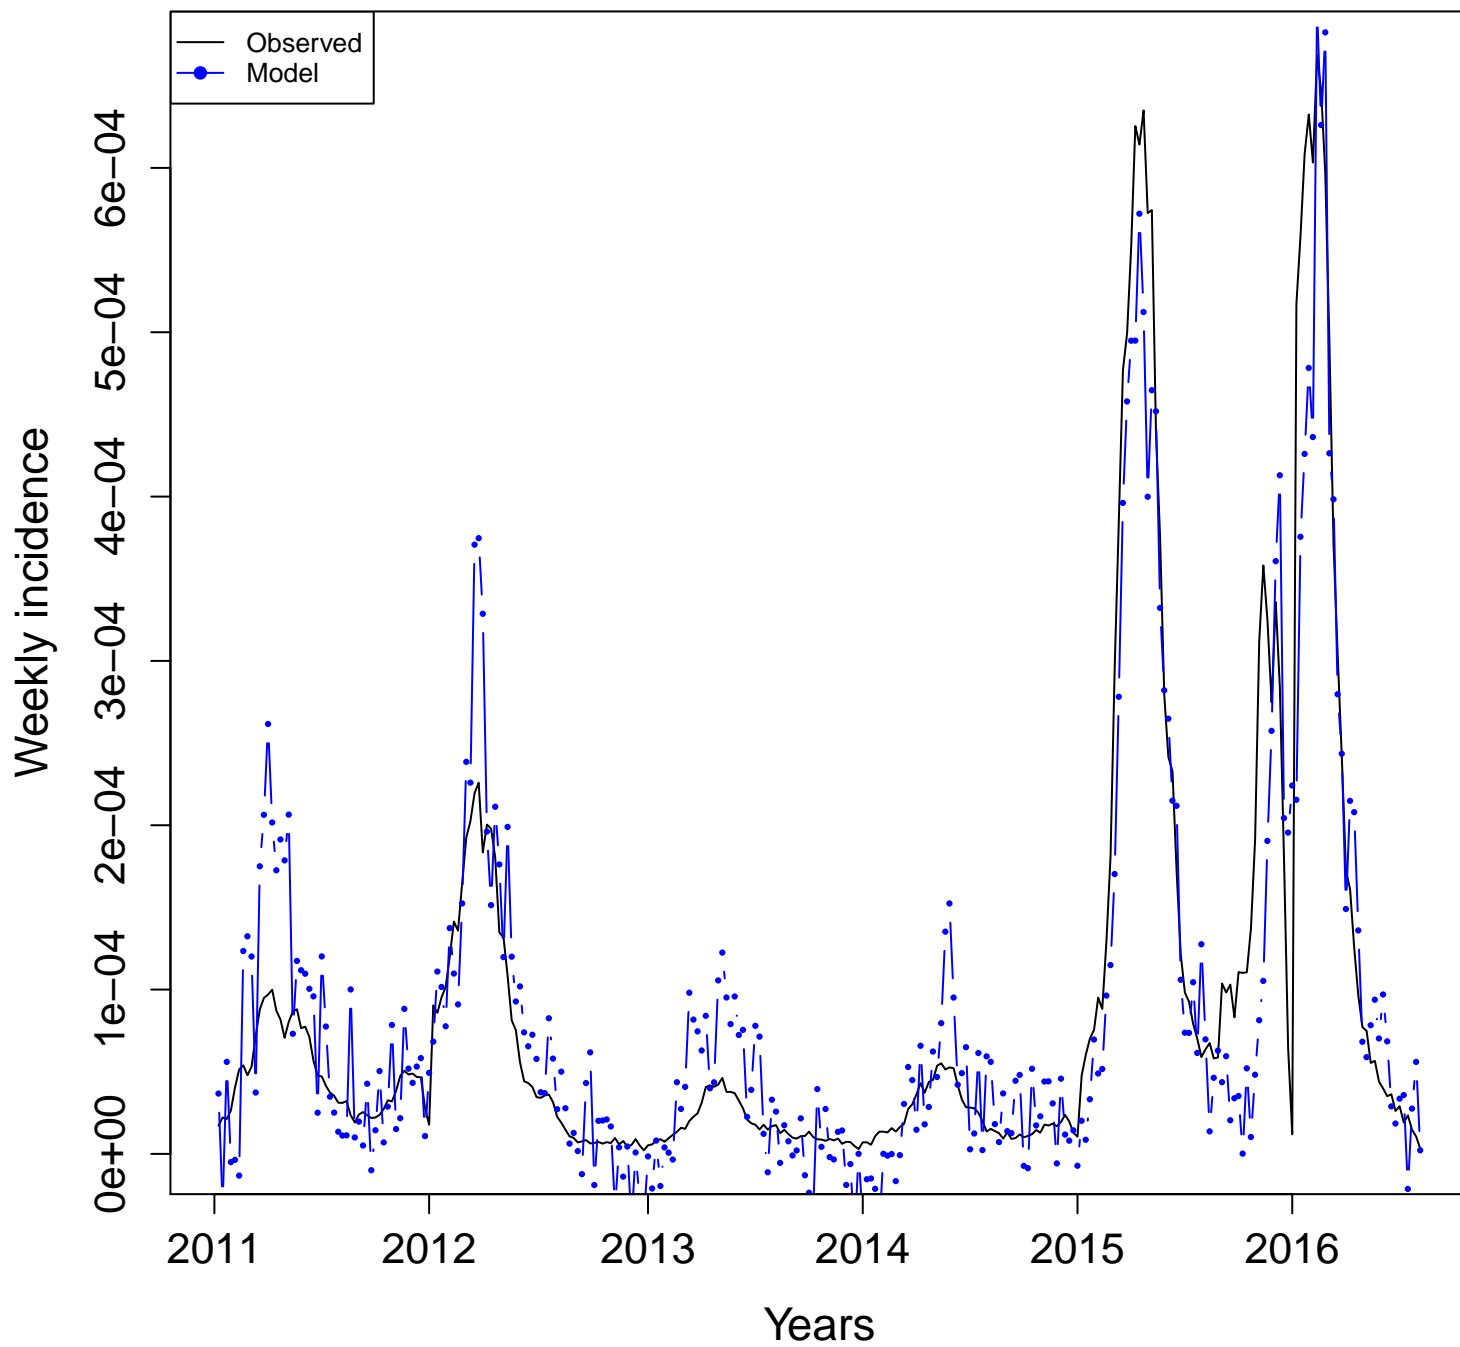

**BR-PE**  
**Adj. R squared = 0.8083**

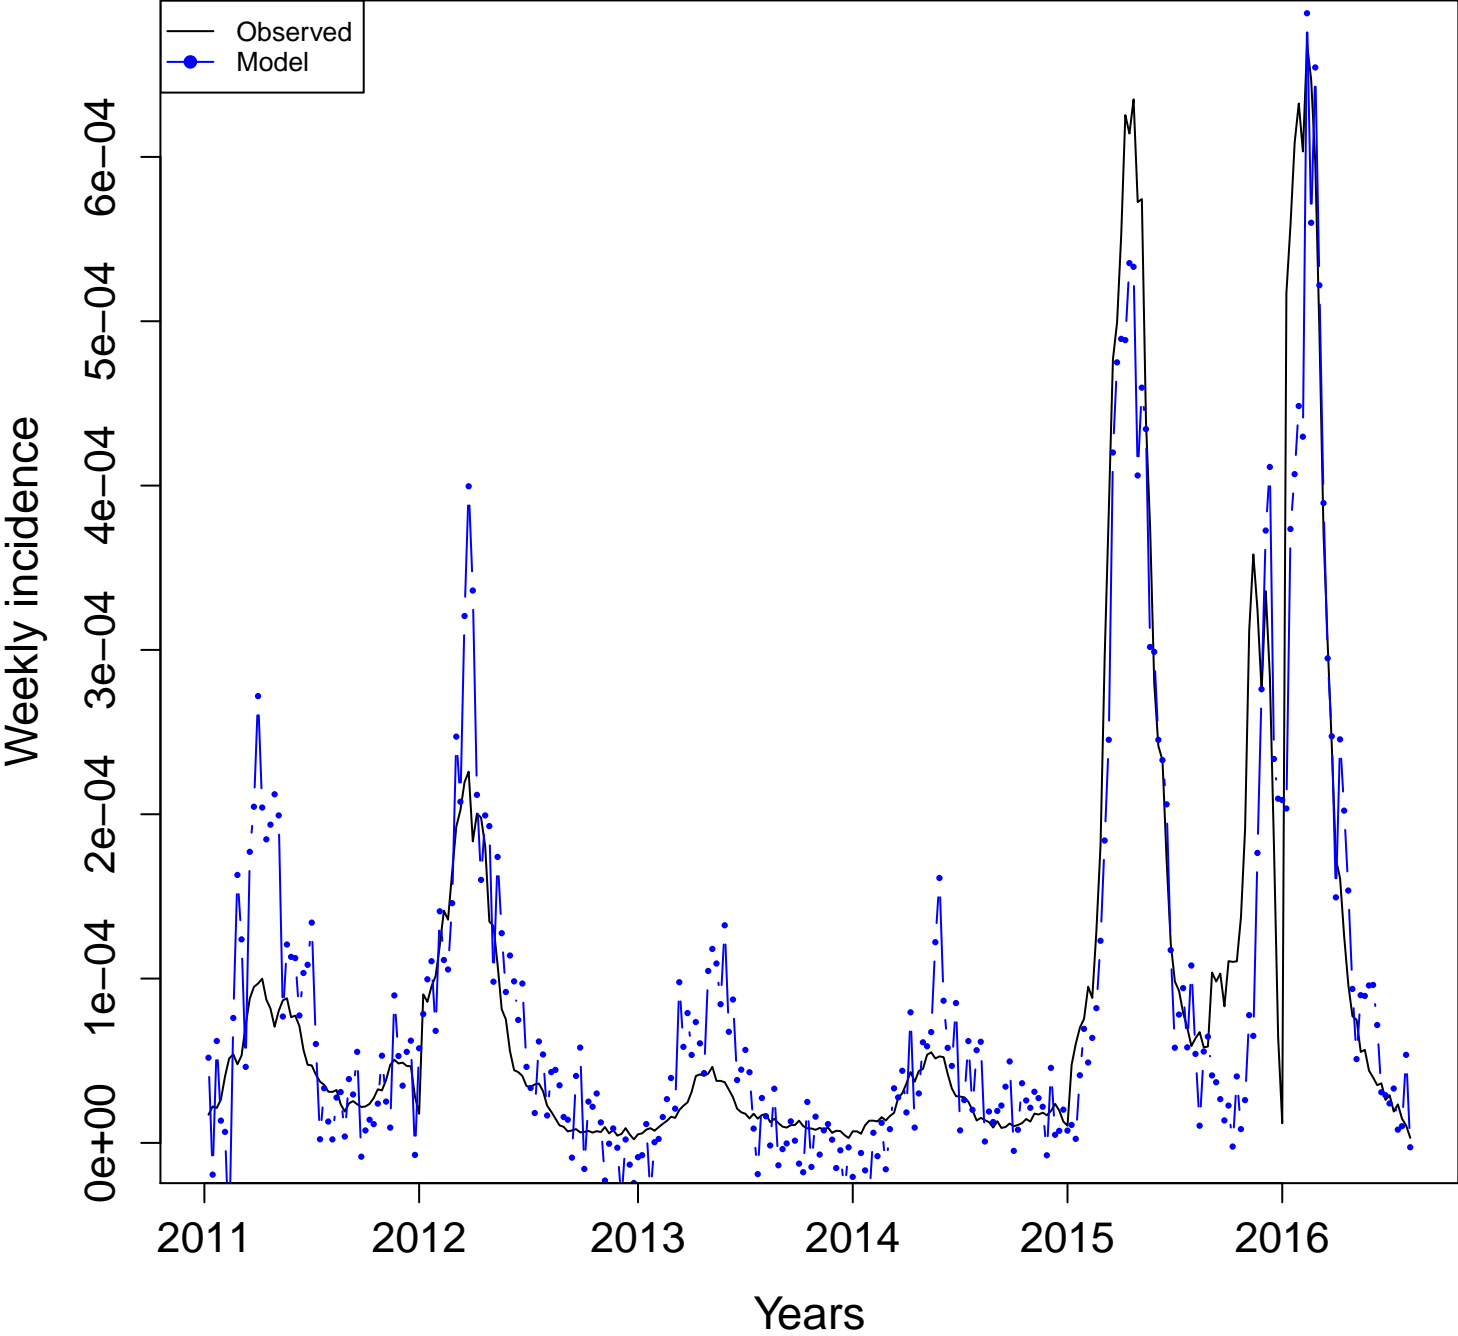

**Uncorrelated  
(n = 2)**

**BR-PE  
Adj. R squared = 0.7141**

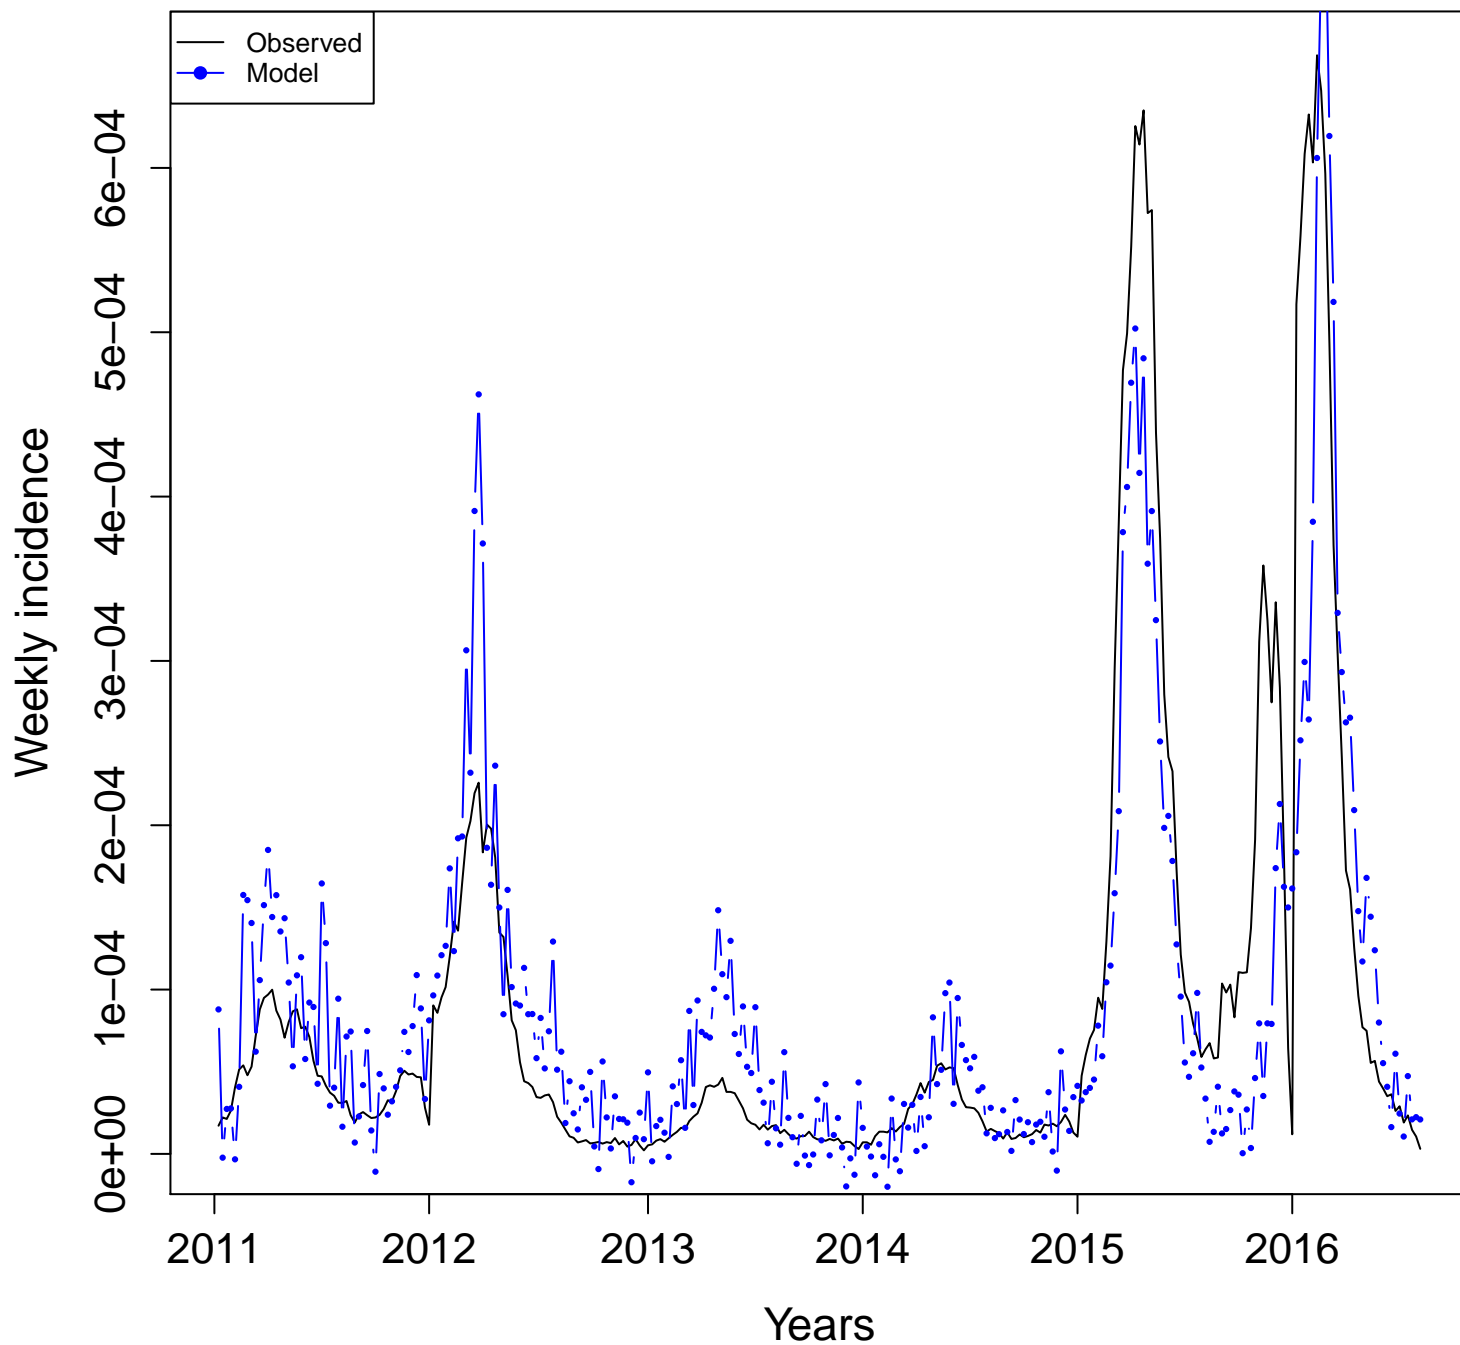

**Individual terms**  
**Adjusted R squared**

**Pernambuco (PE)**



**PE- aedes.aegypti**  
**Adj. R squared = 0.2286**

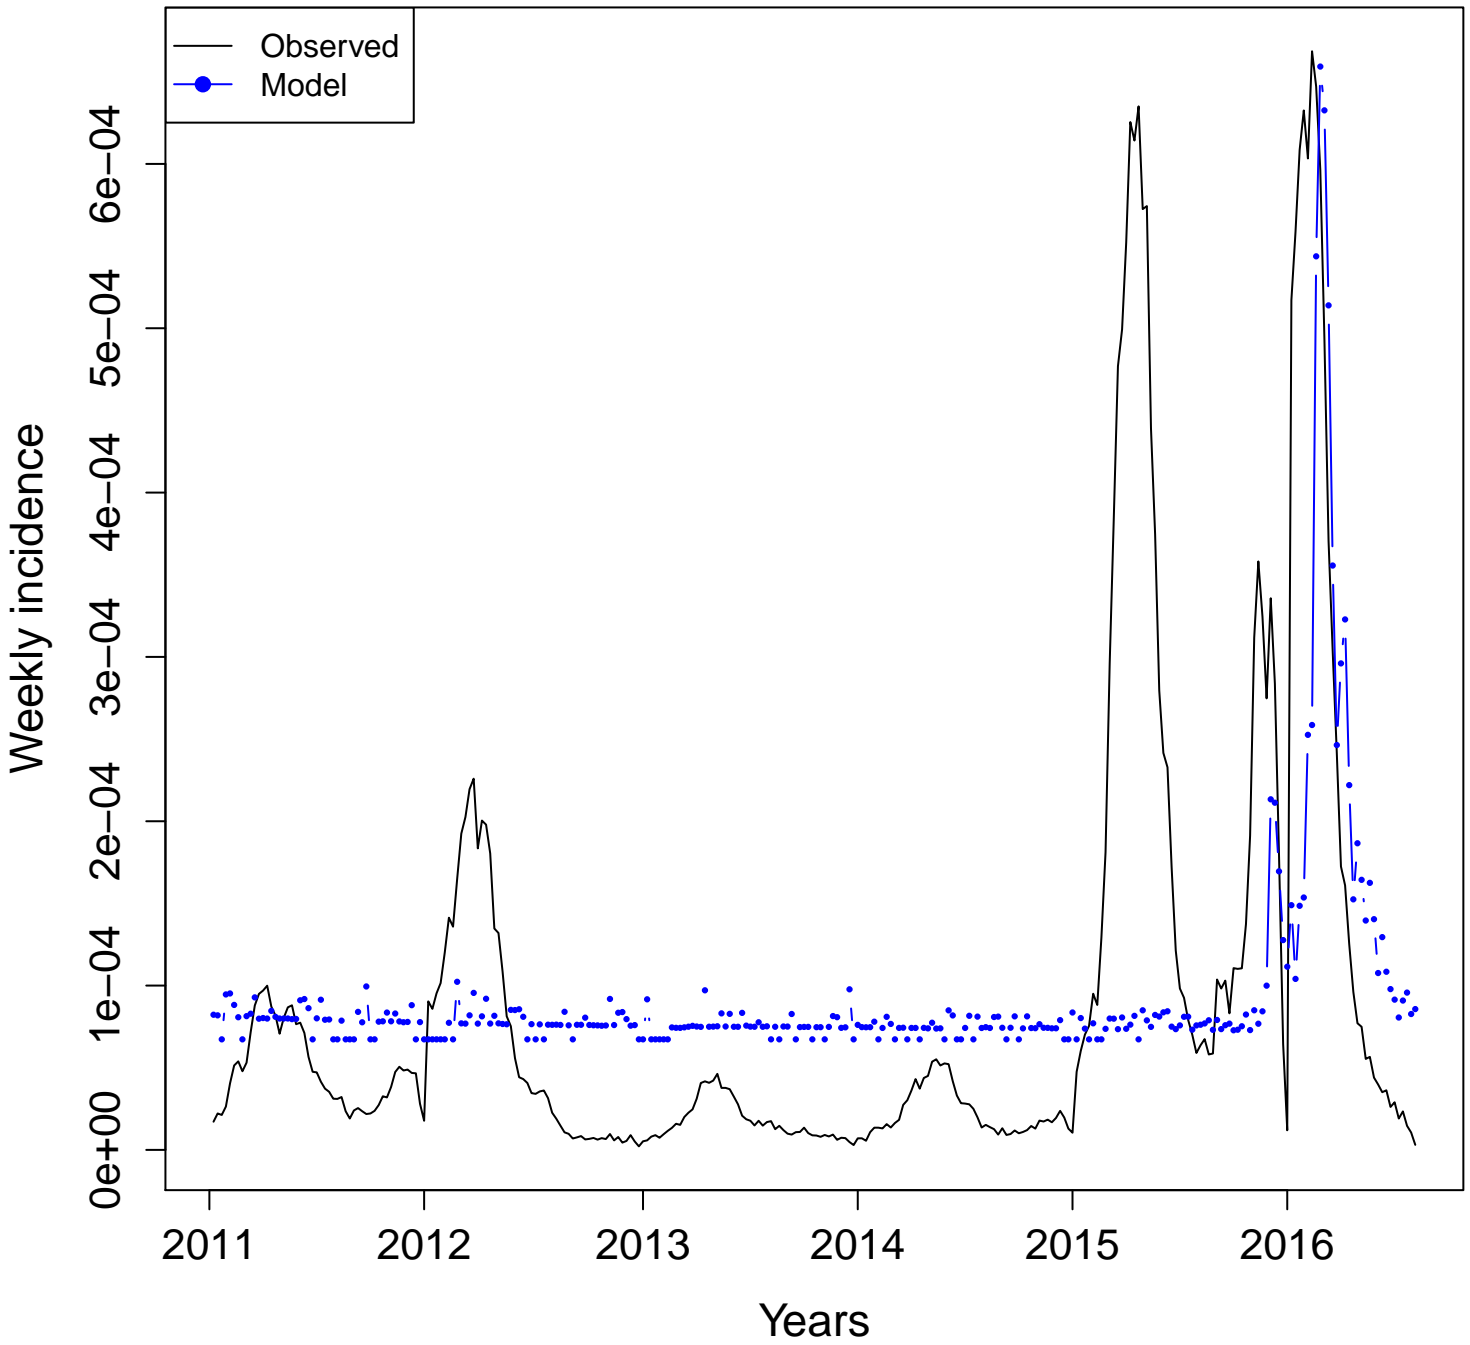

**PE- aedes**  
**Adj. R squared = 0.2396**

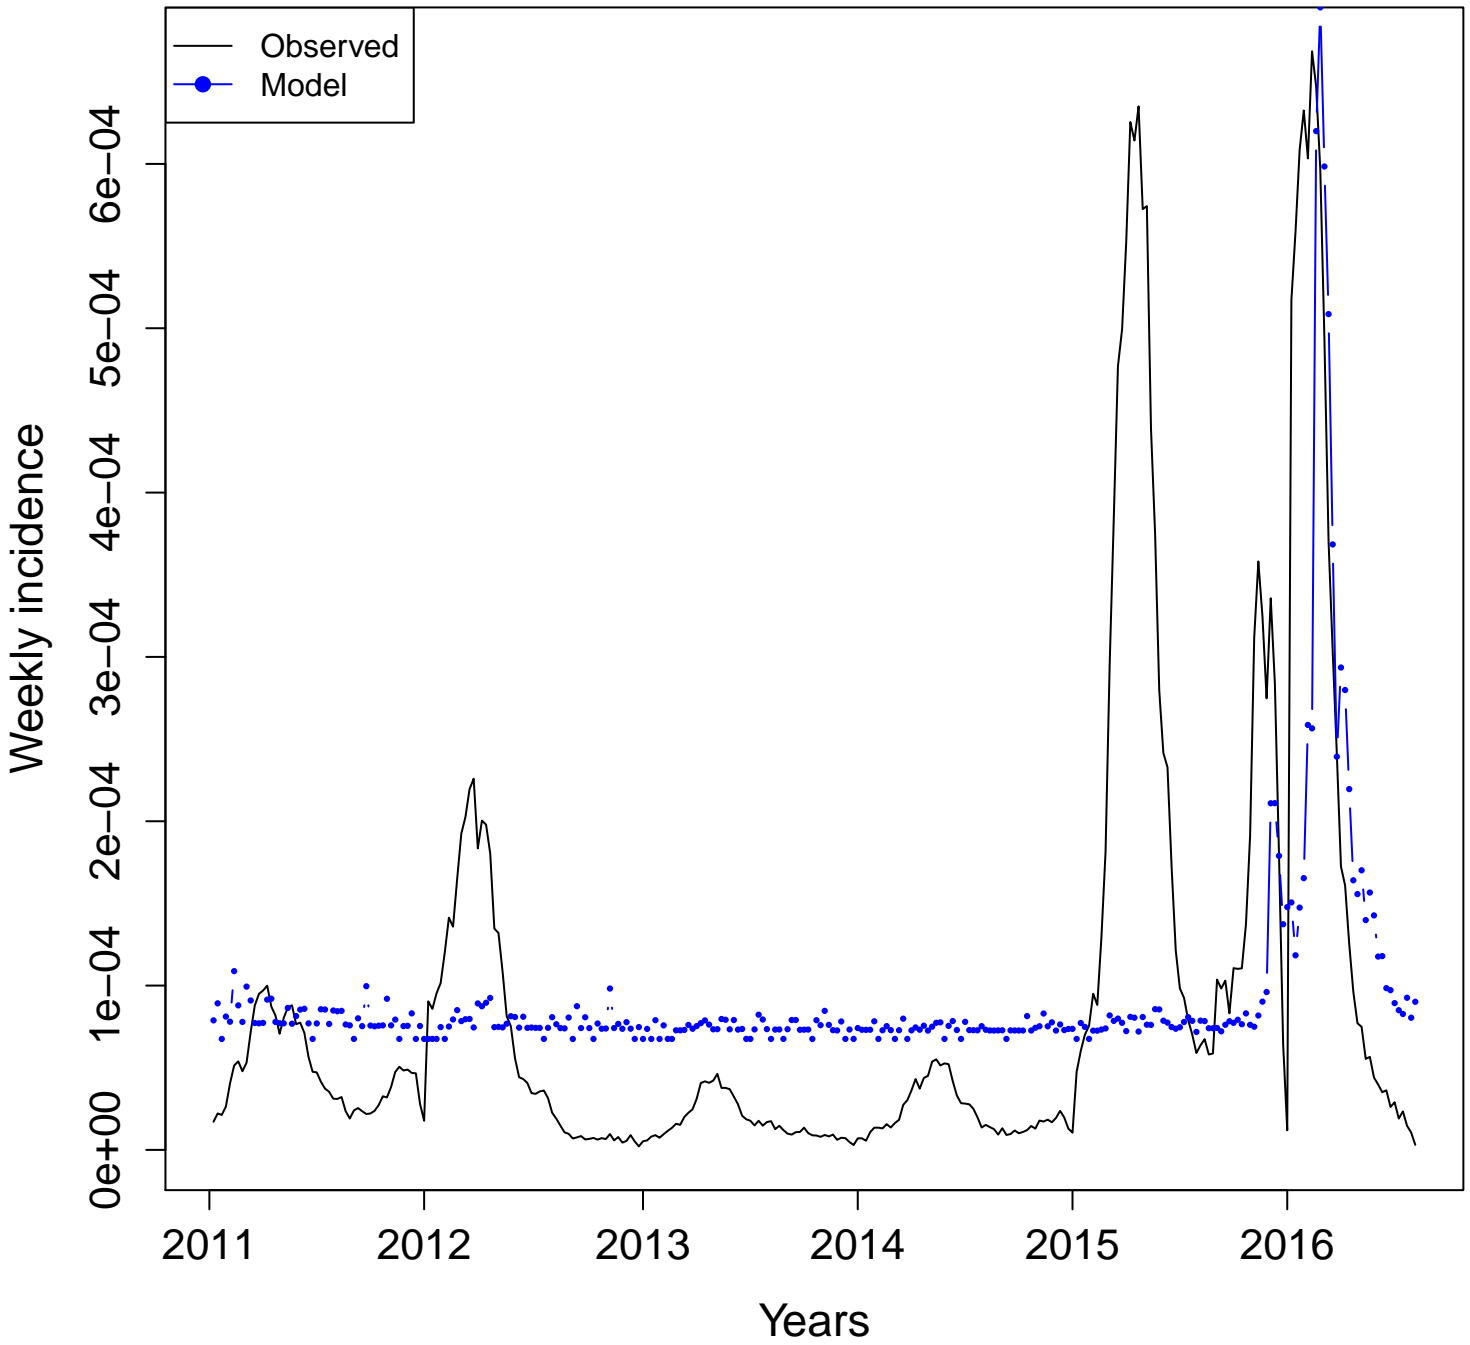

**PE- aegypti**  
**Adj. R squared = 0.2271**

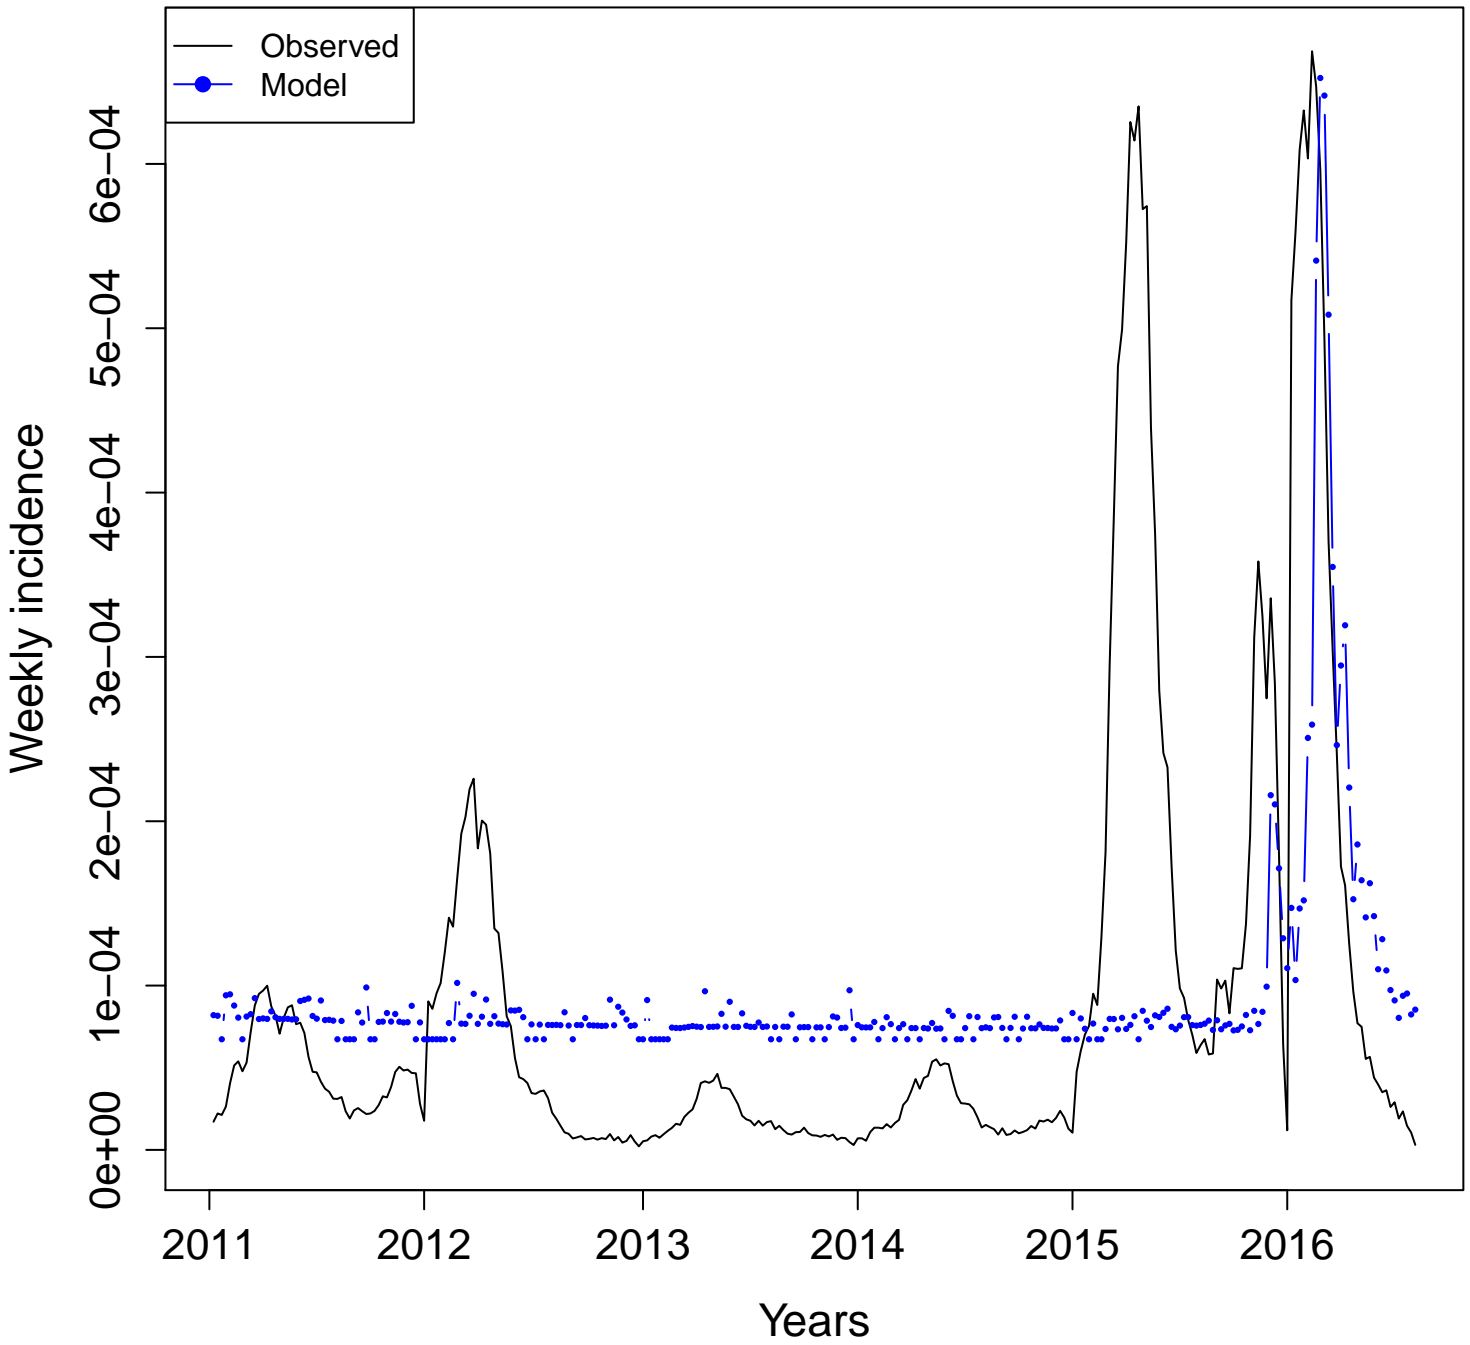

# PE- dengue

Adj. R squared = 0.6232

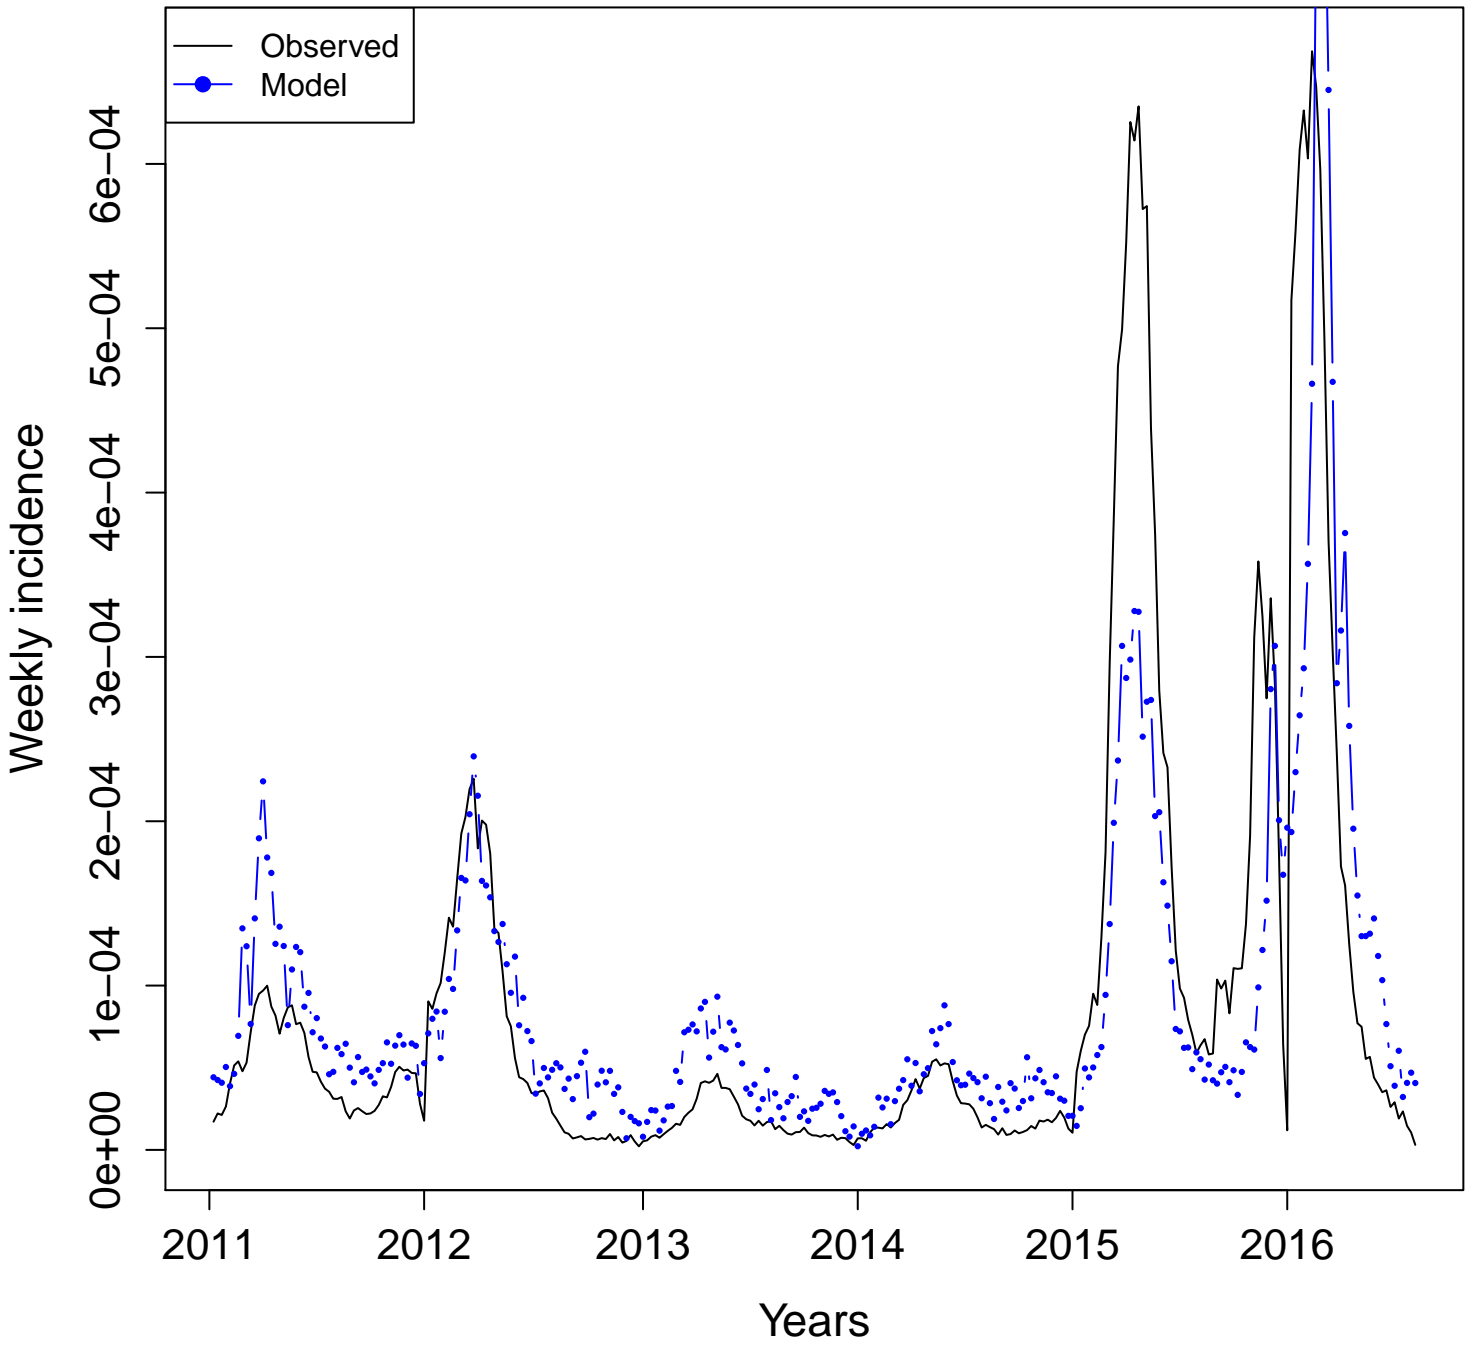

**PE- dengue.sintomas**  
**Adj. R squared = 0.7118**

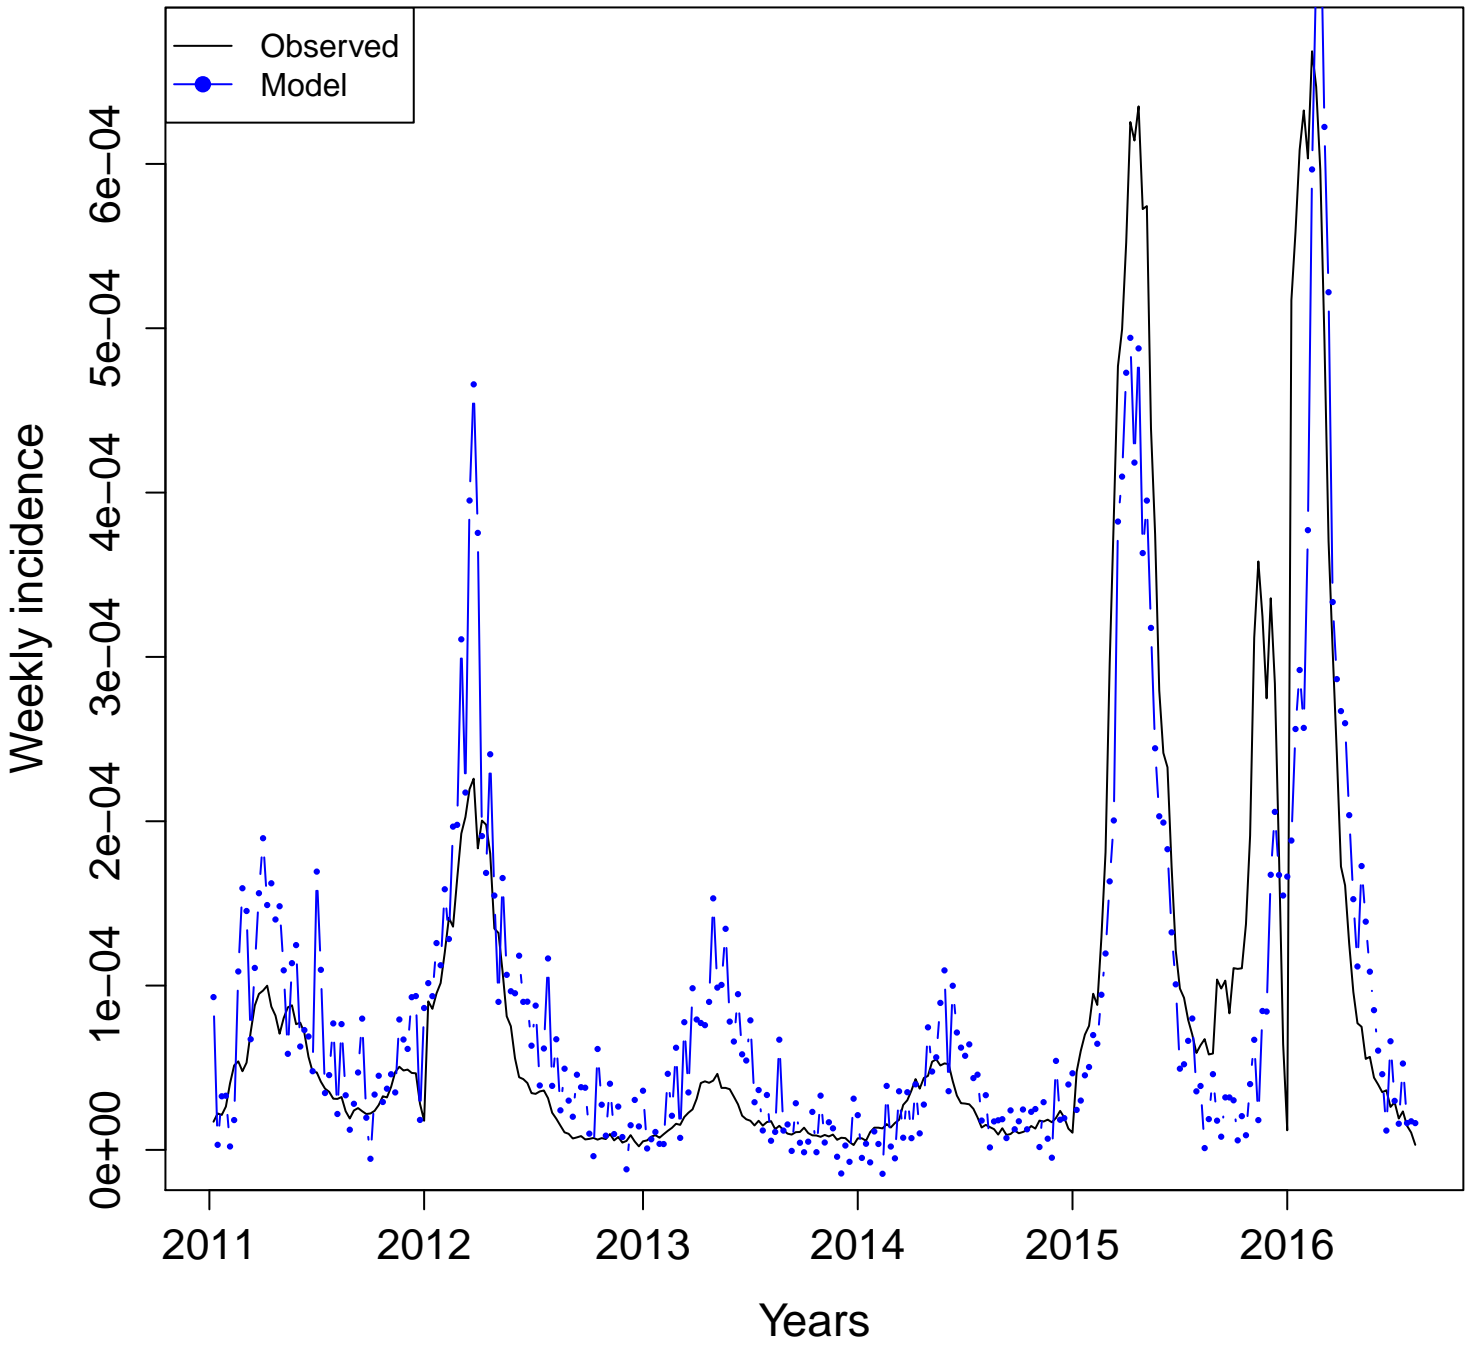

# PE- dengue.virus

Adj. R squared = 0.3911

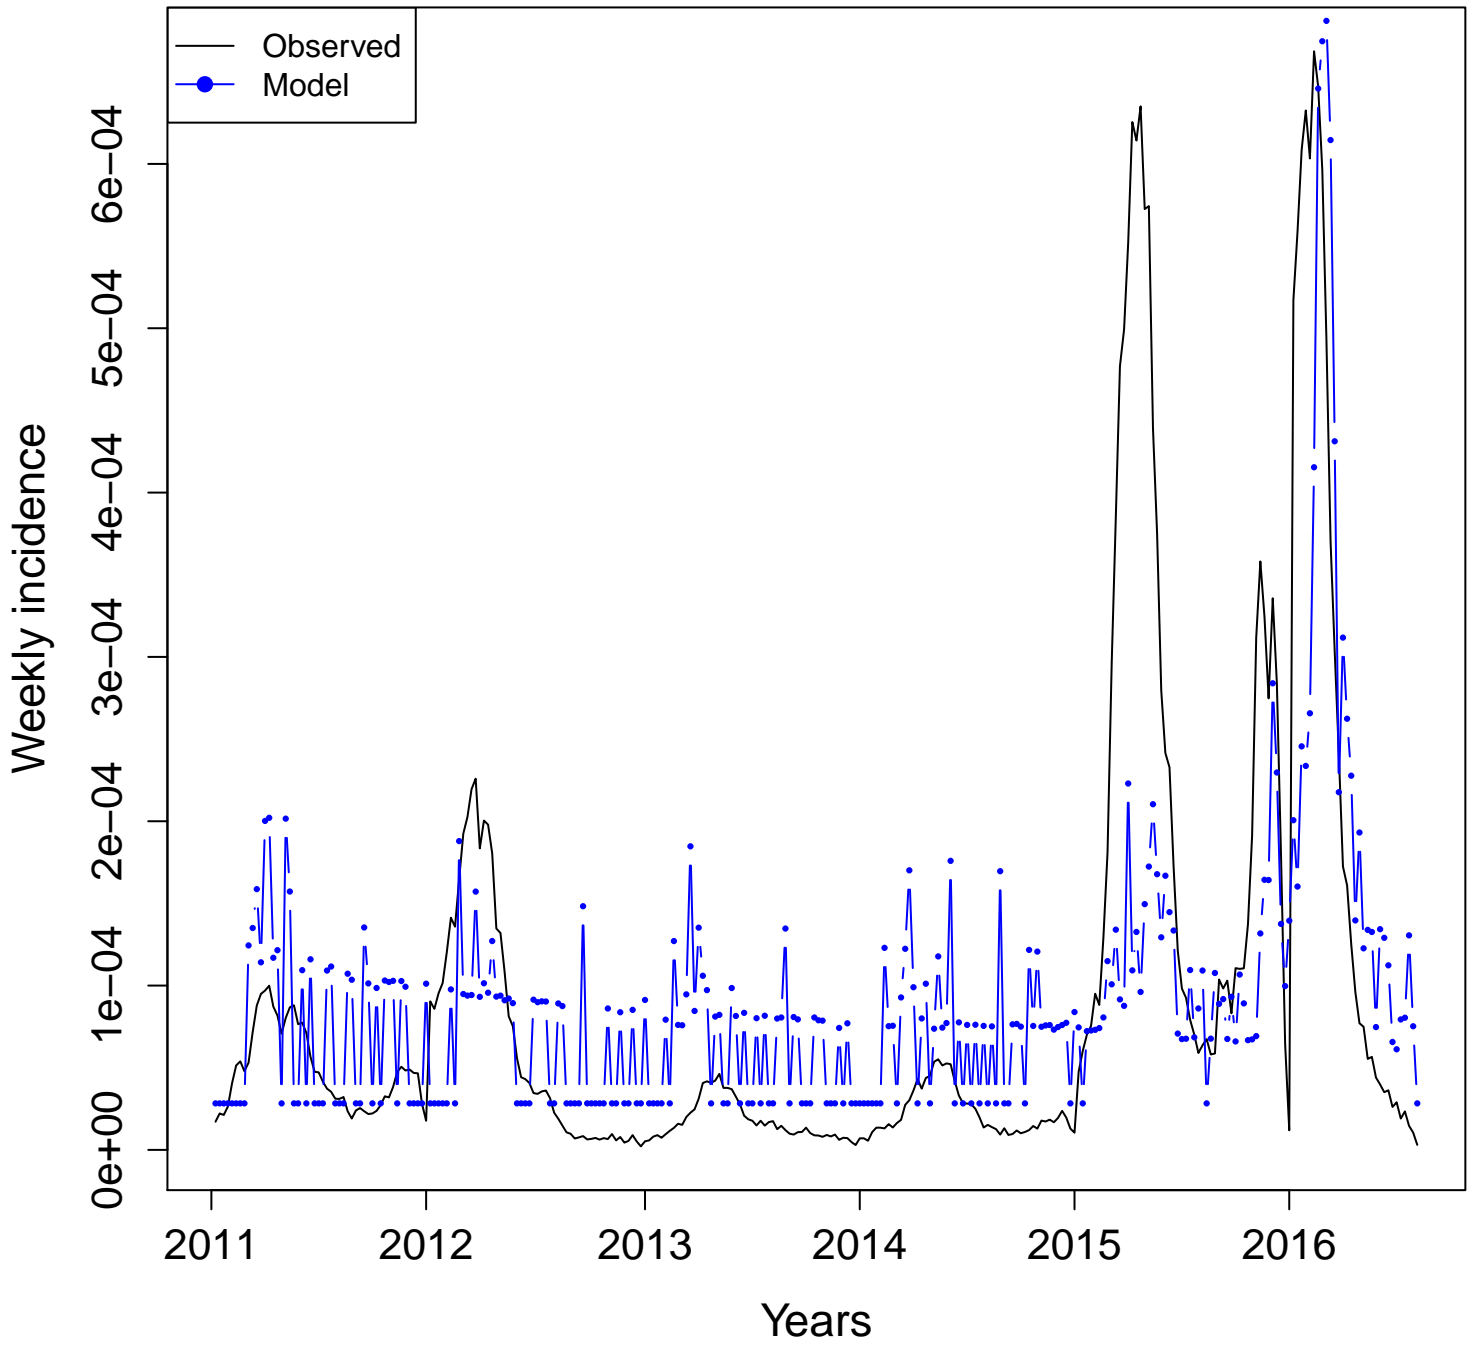

**PE- DHF**  
**Adj. R squared = -0.0033**

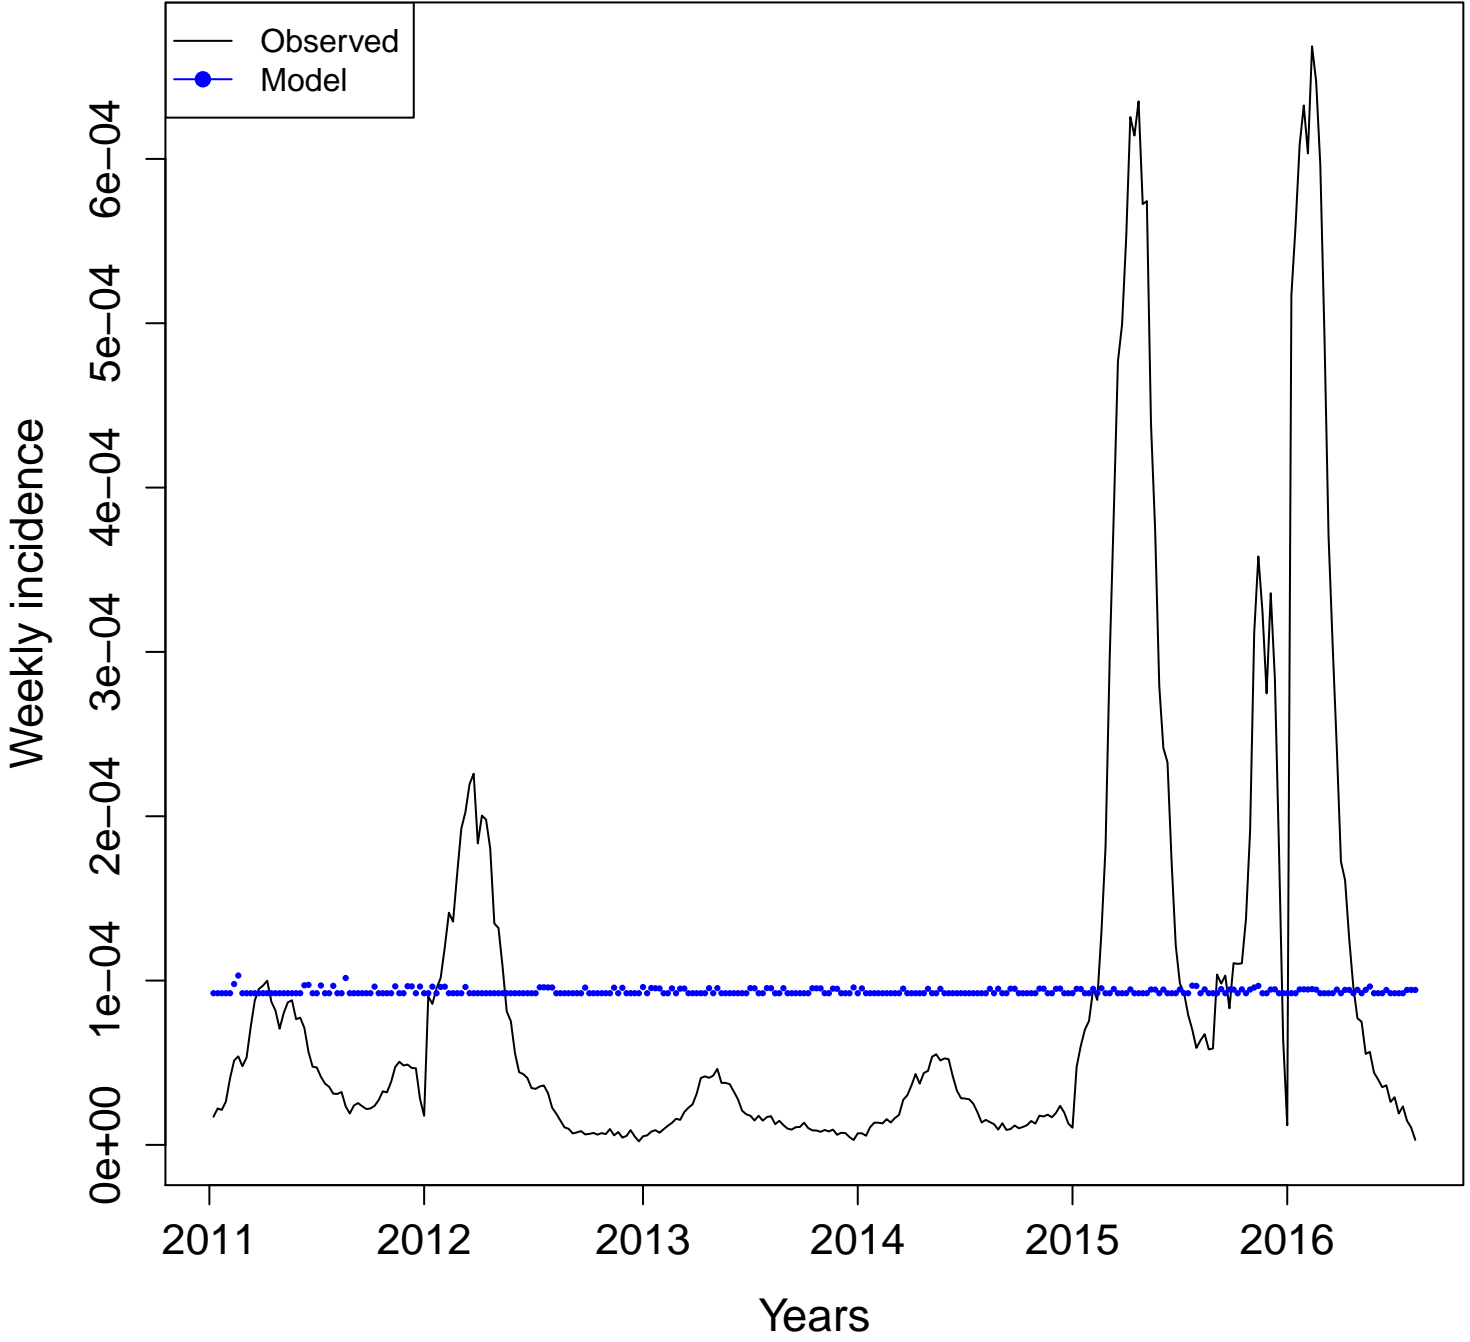

**PE- mosquito.dengue**  
**Adj. R squared = 0.3725**

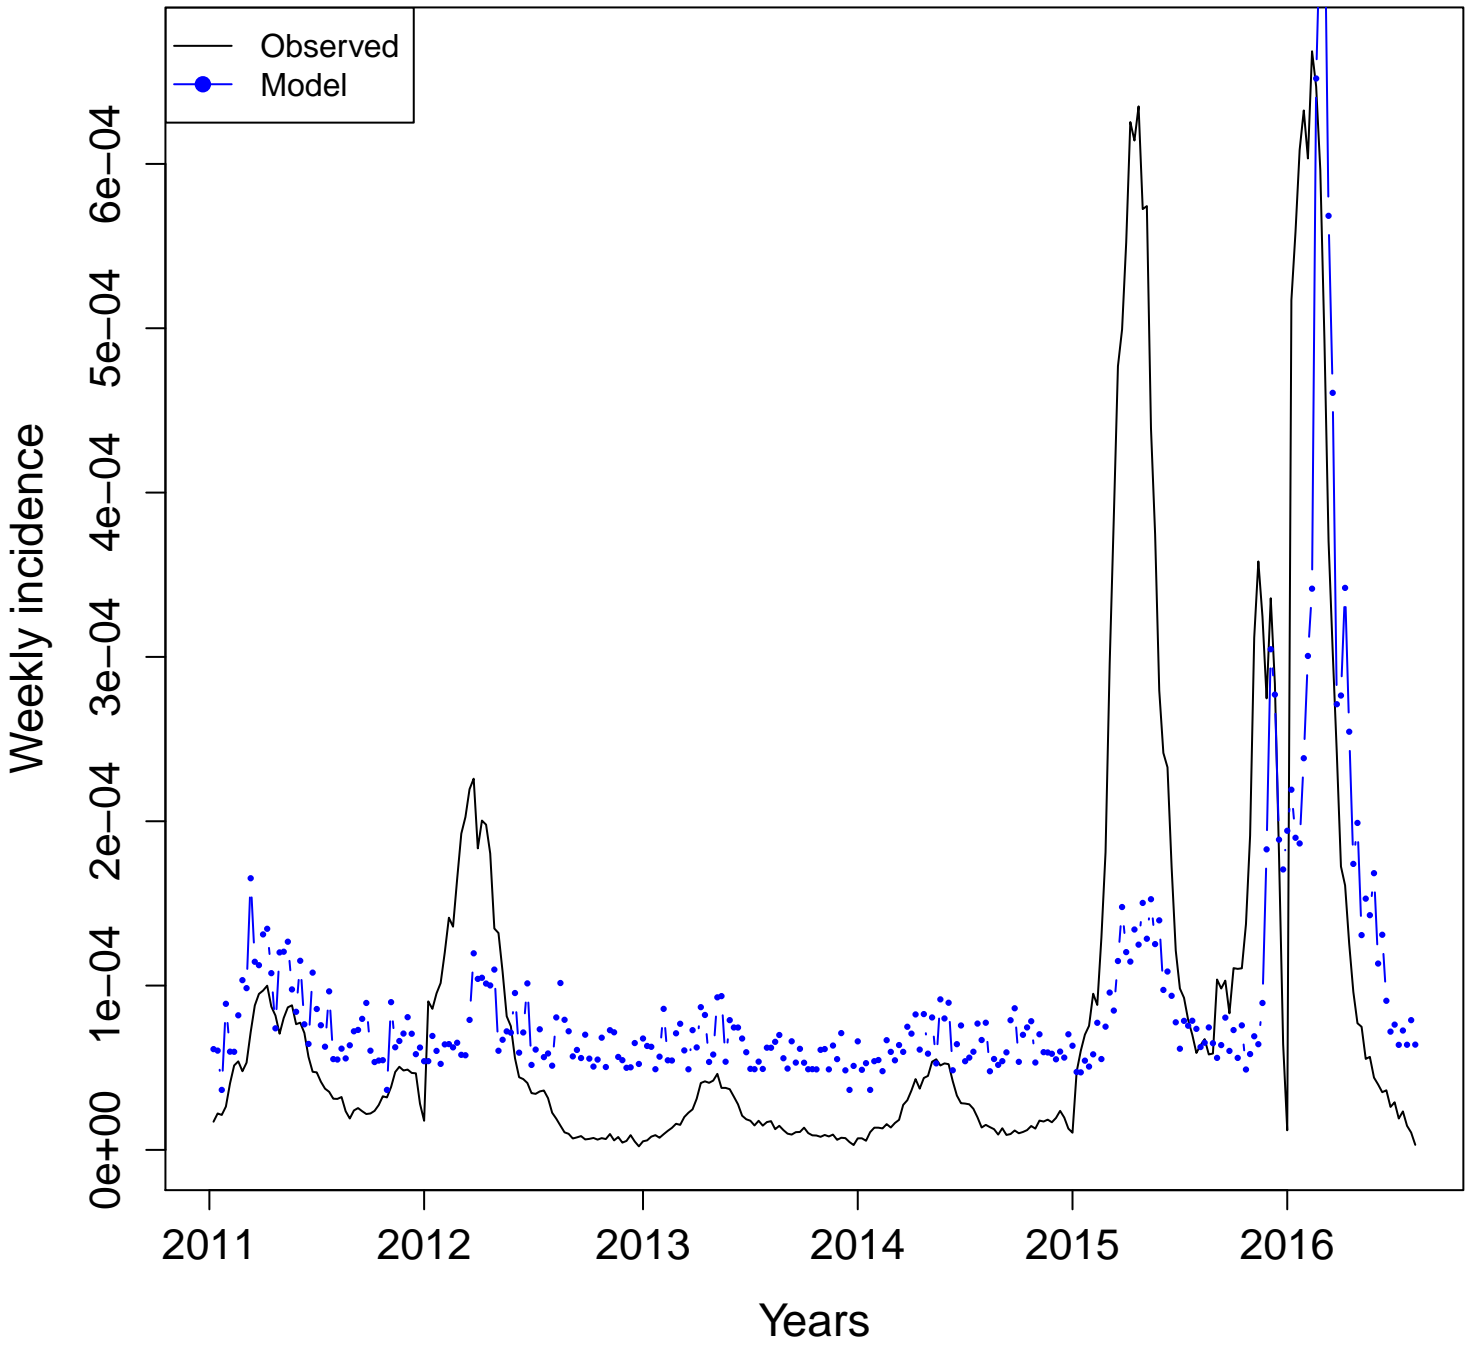



# PE- mosquito

Adj. R squared = 0.3893

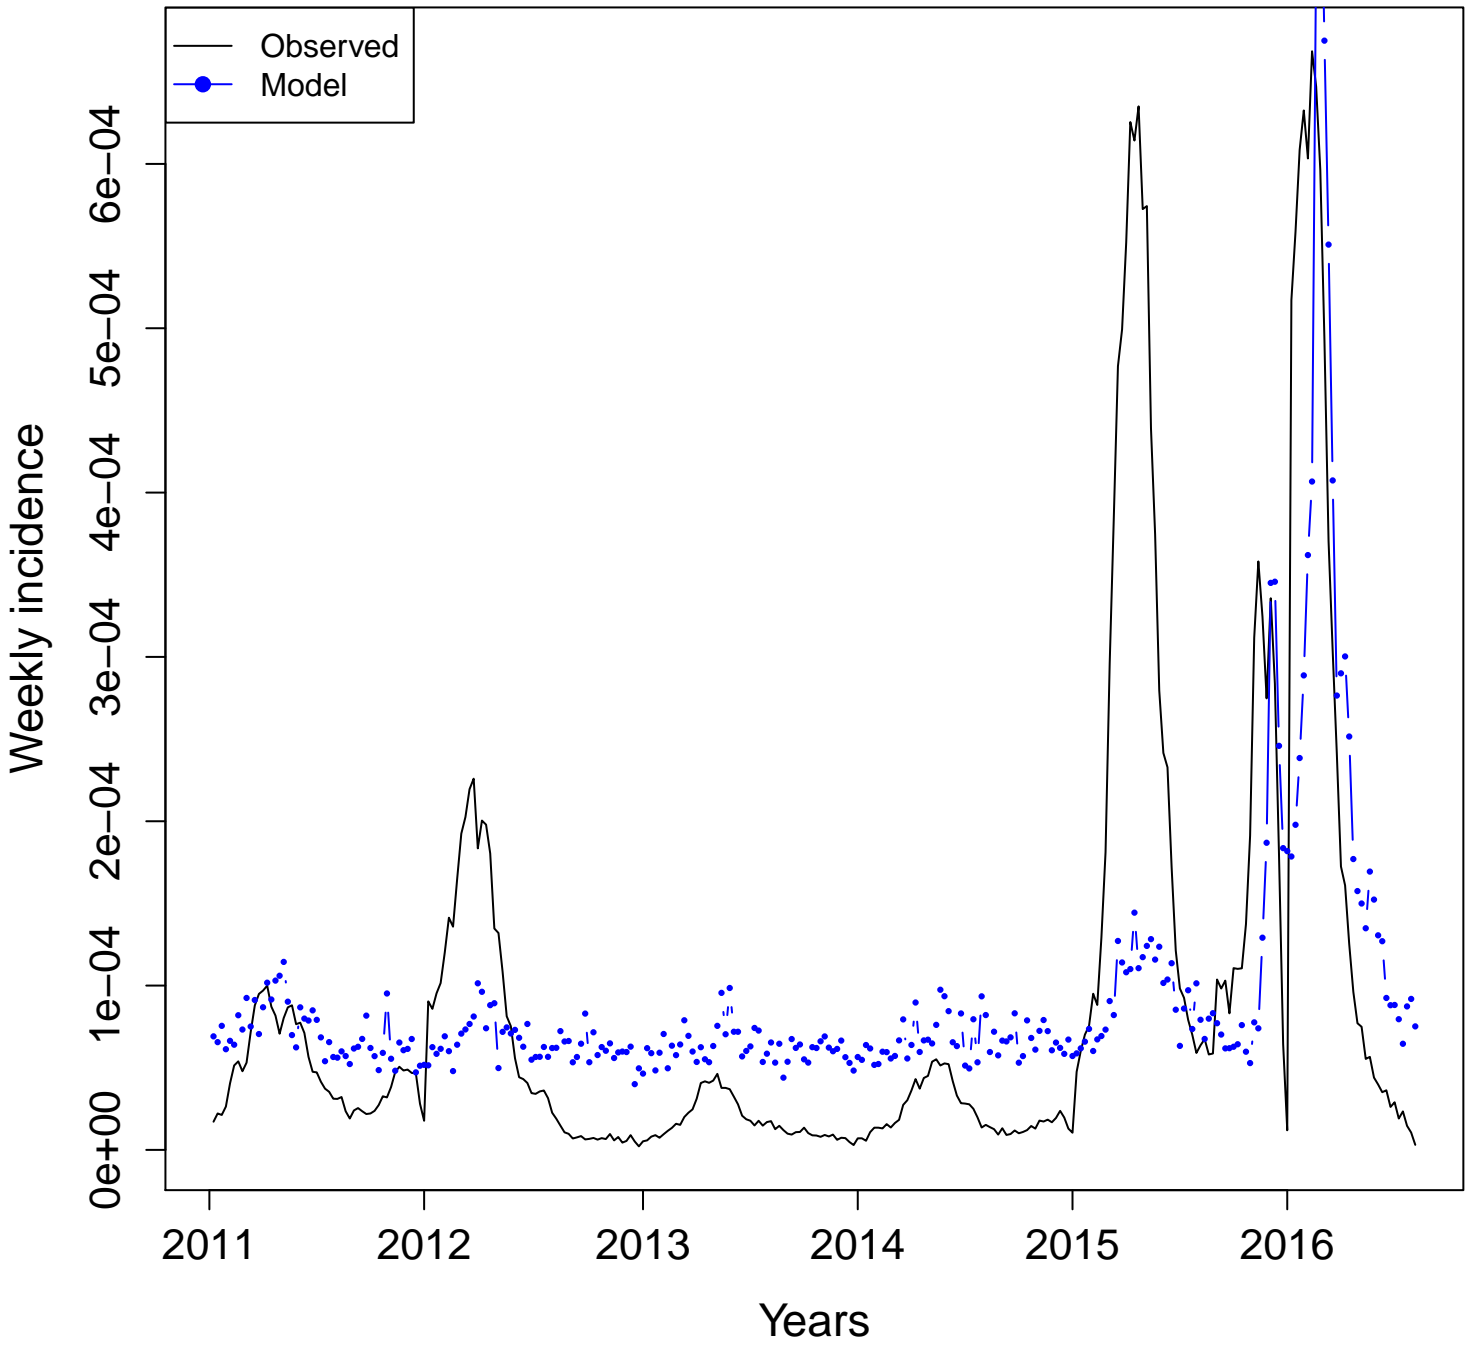

**PE- sintomas.da.dengue**  
**Adj. R squared = 0.6745**

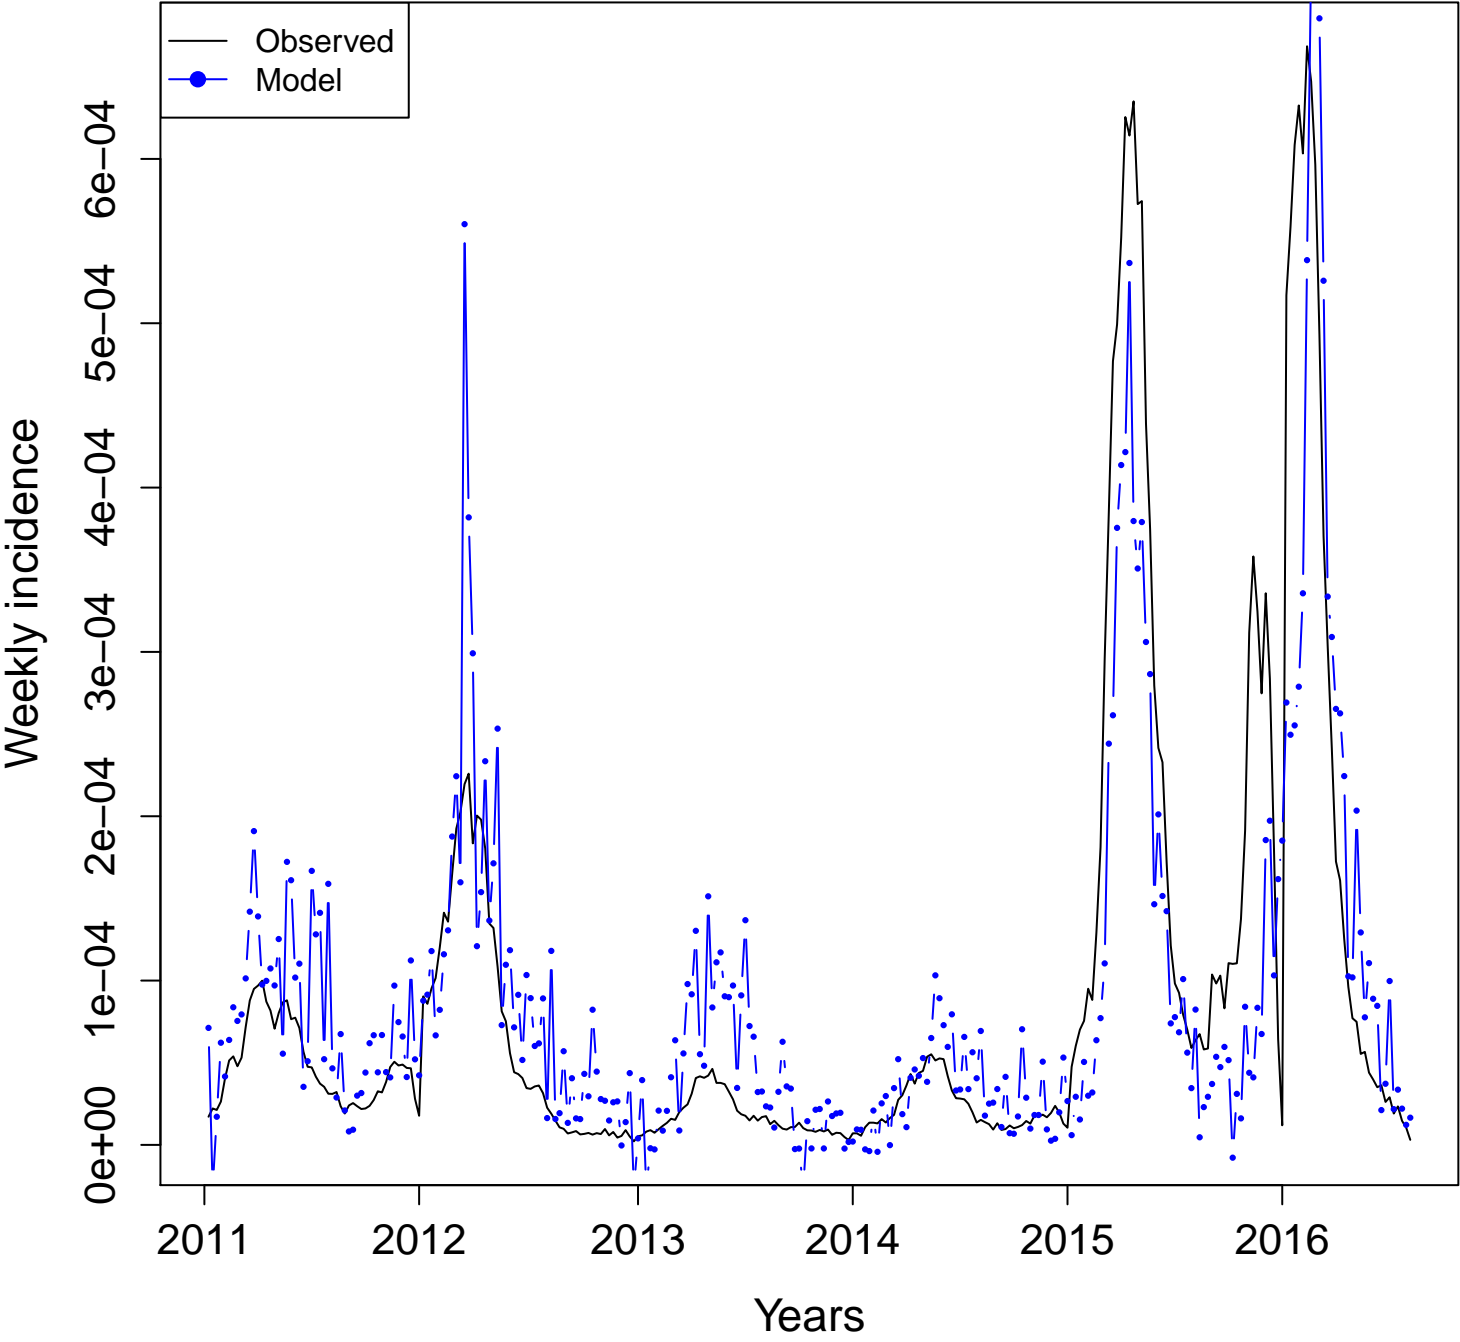

## Piauí (PI)

# Dengue incidence vs. Google Health Trends (2011–2016)

### Definitions:

- **Combined terms:**
  - **All:** model with all the available terms.  $n$  = number of terms
  - **Four:** model with "dengue", "dengue sintomas", "aedes", and "mosquito".
  - **Uncorrelated:** model with non-correlated terms.  $n$  = number of uncorrelated terms
- **Individual terms:** Plots developed with one term at a time.
- Terms for all and uncorrelated models can be found in additional file 3.

**Combined terms**  
**Adjusted R squared**

**Piauí (PI)**

All  
(n = 8)

BR-PI  
Adj. R squared = 0.5528

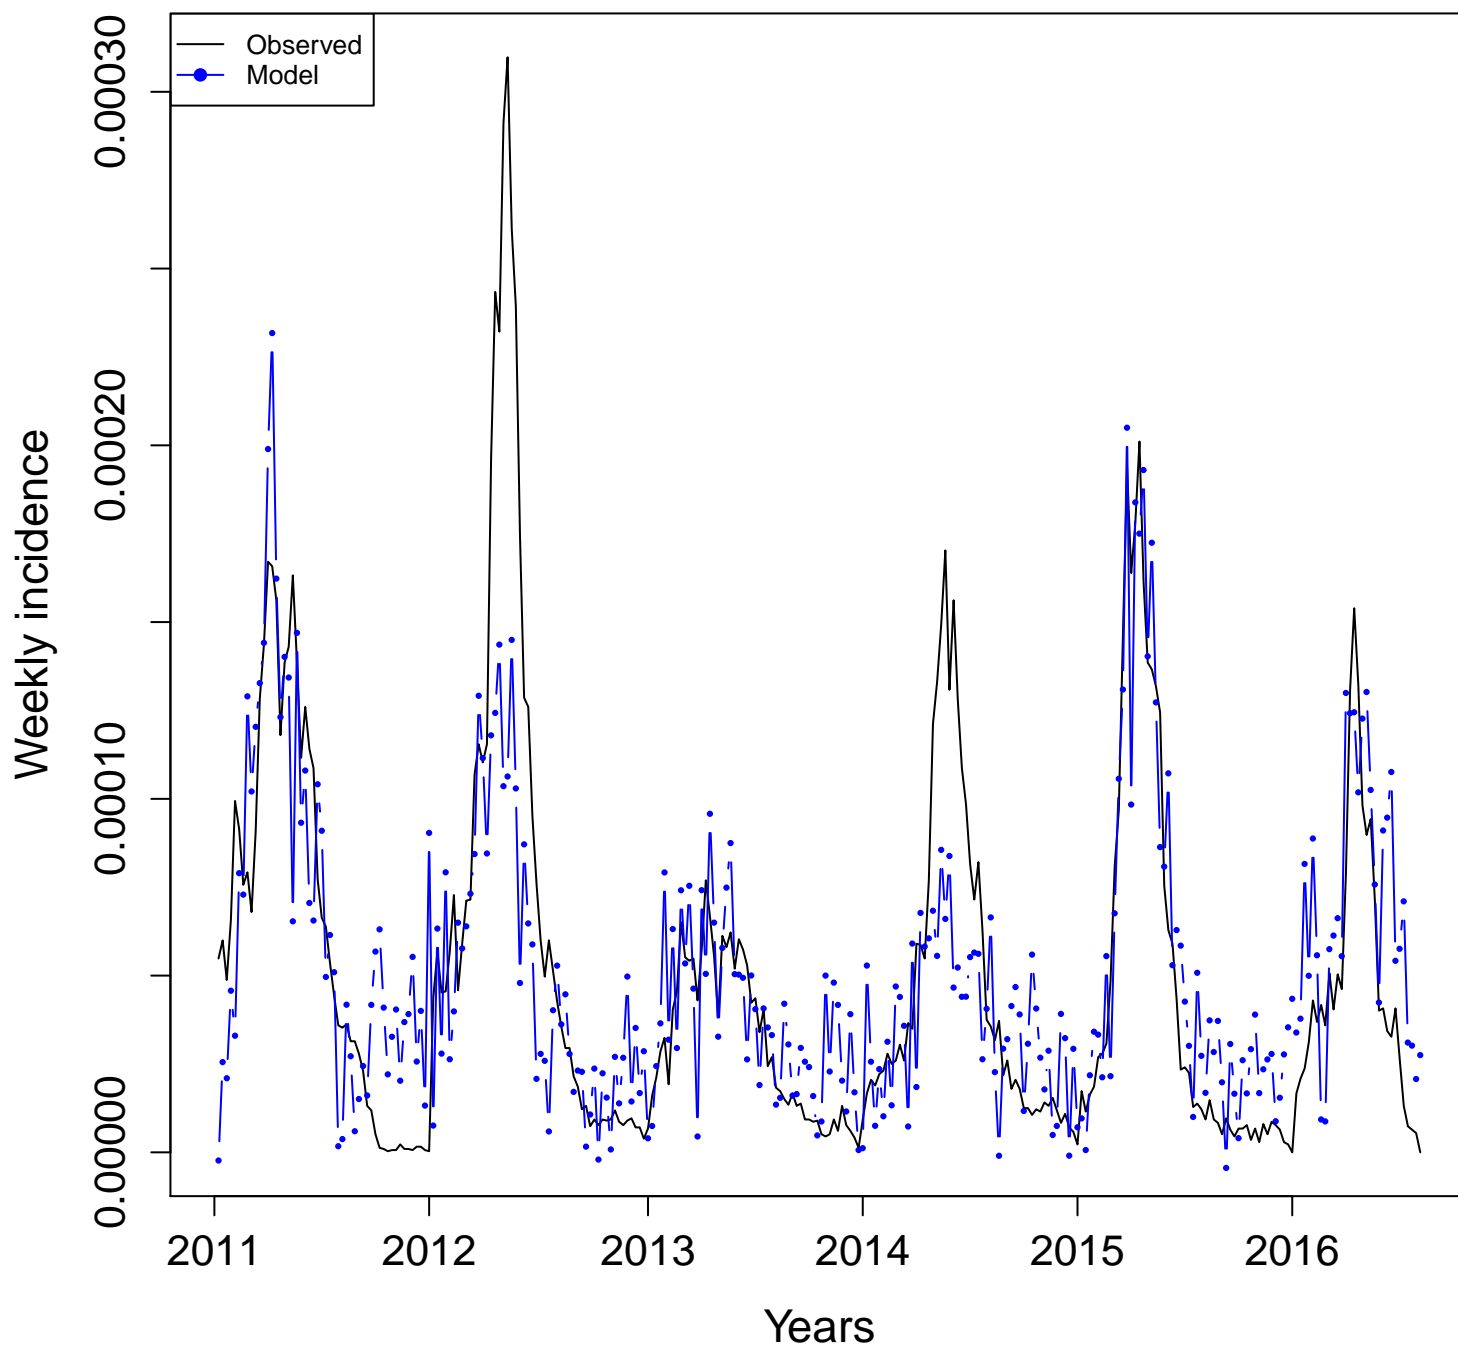

**BR-PI**  
**Adj. R squared = 0.5419**

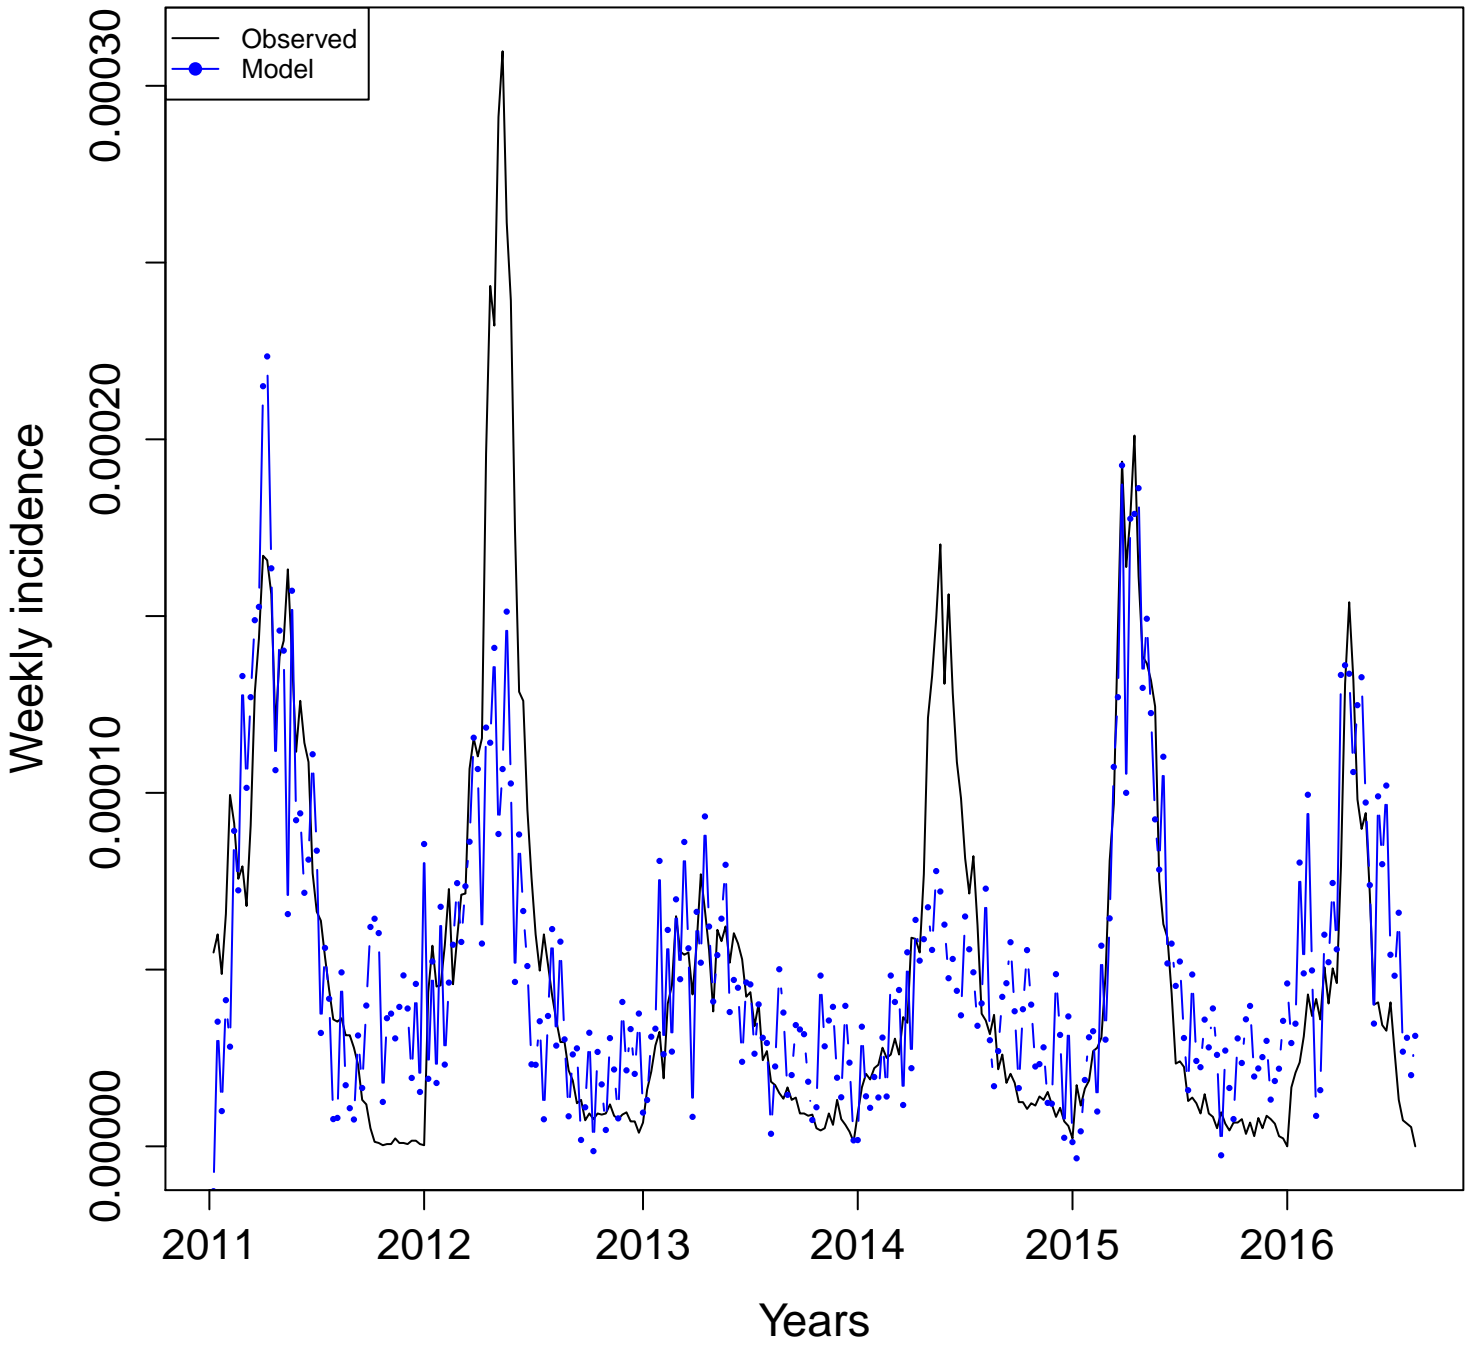

**Uncorrelated  
(n = 3)**

**BR-PI  
Adj. R squared = 0.3774**

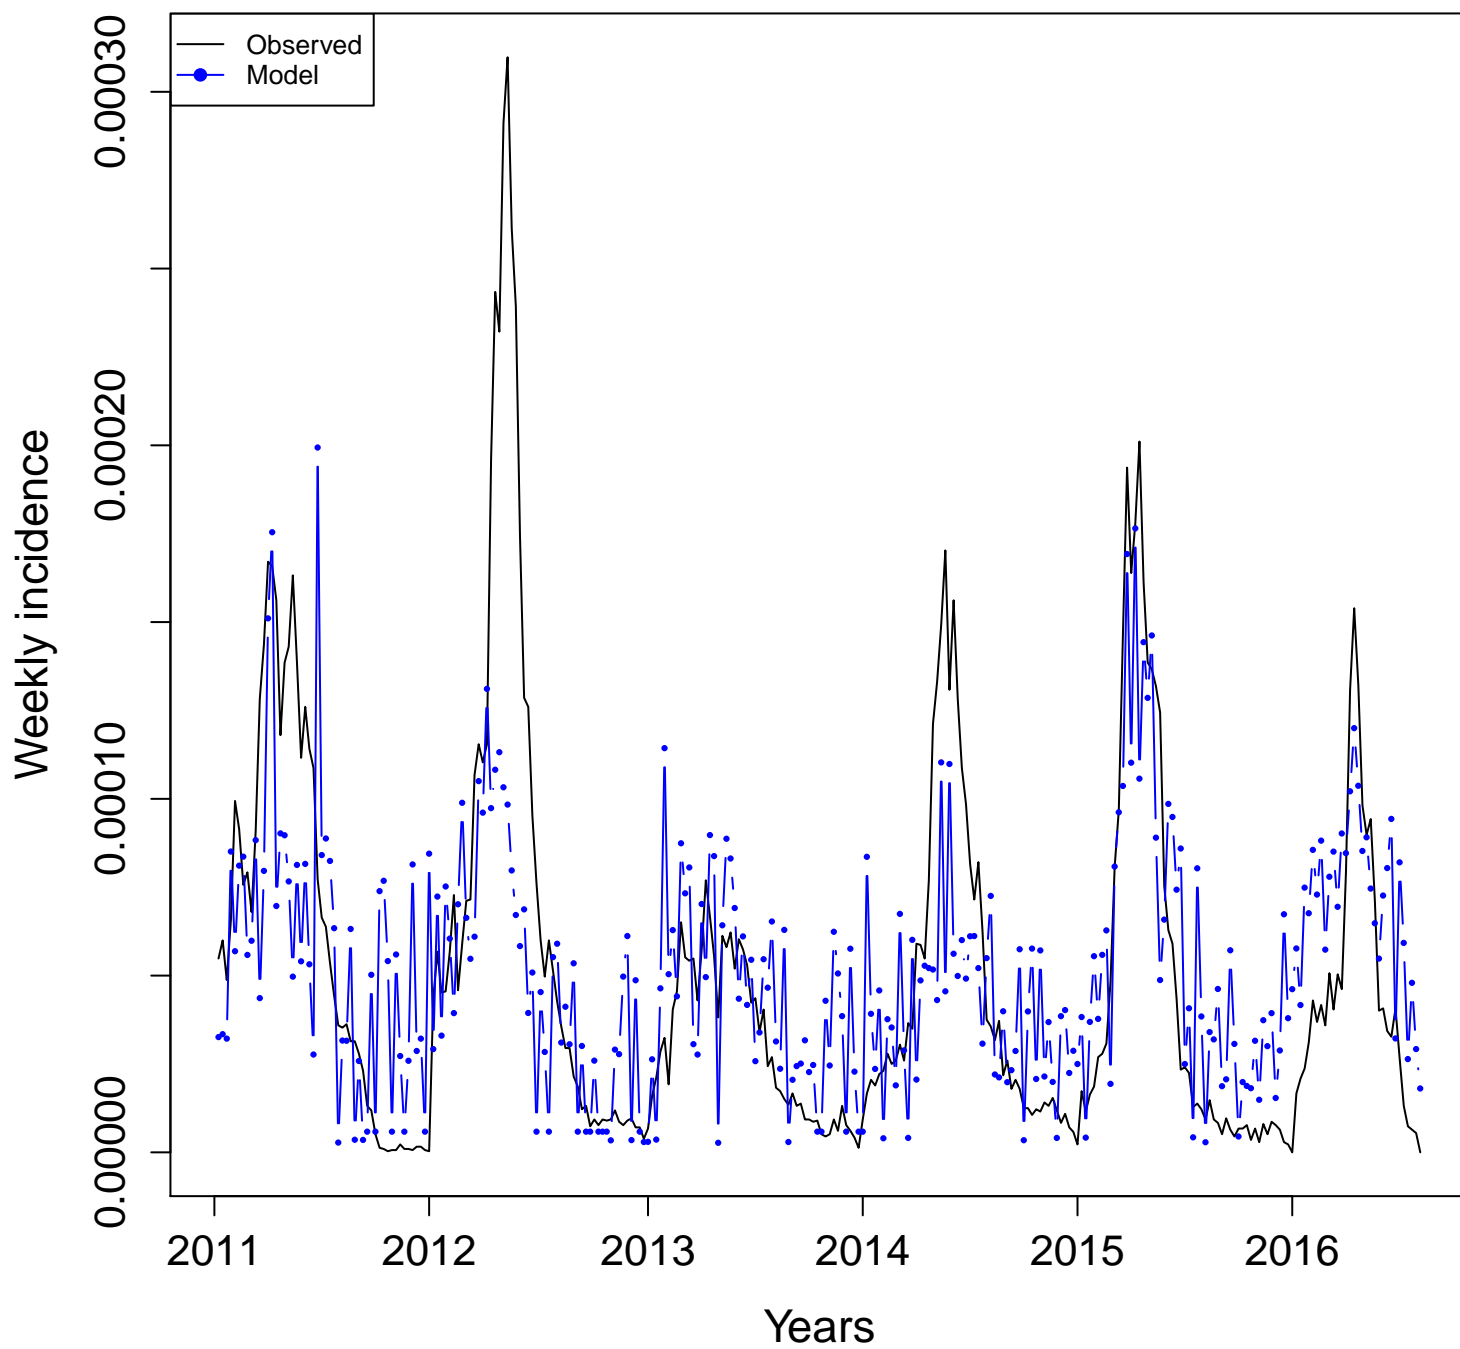

**Individual terms**  
**Adjusted R squared**

**Piauí (PI)**



**PI- aedes.aegypti**  
**Adj. R squared = 0.0051**

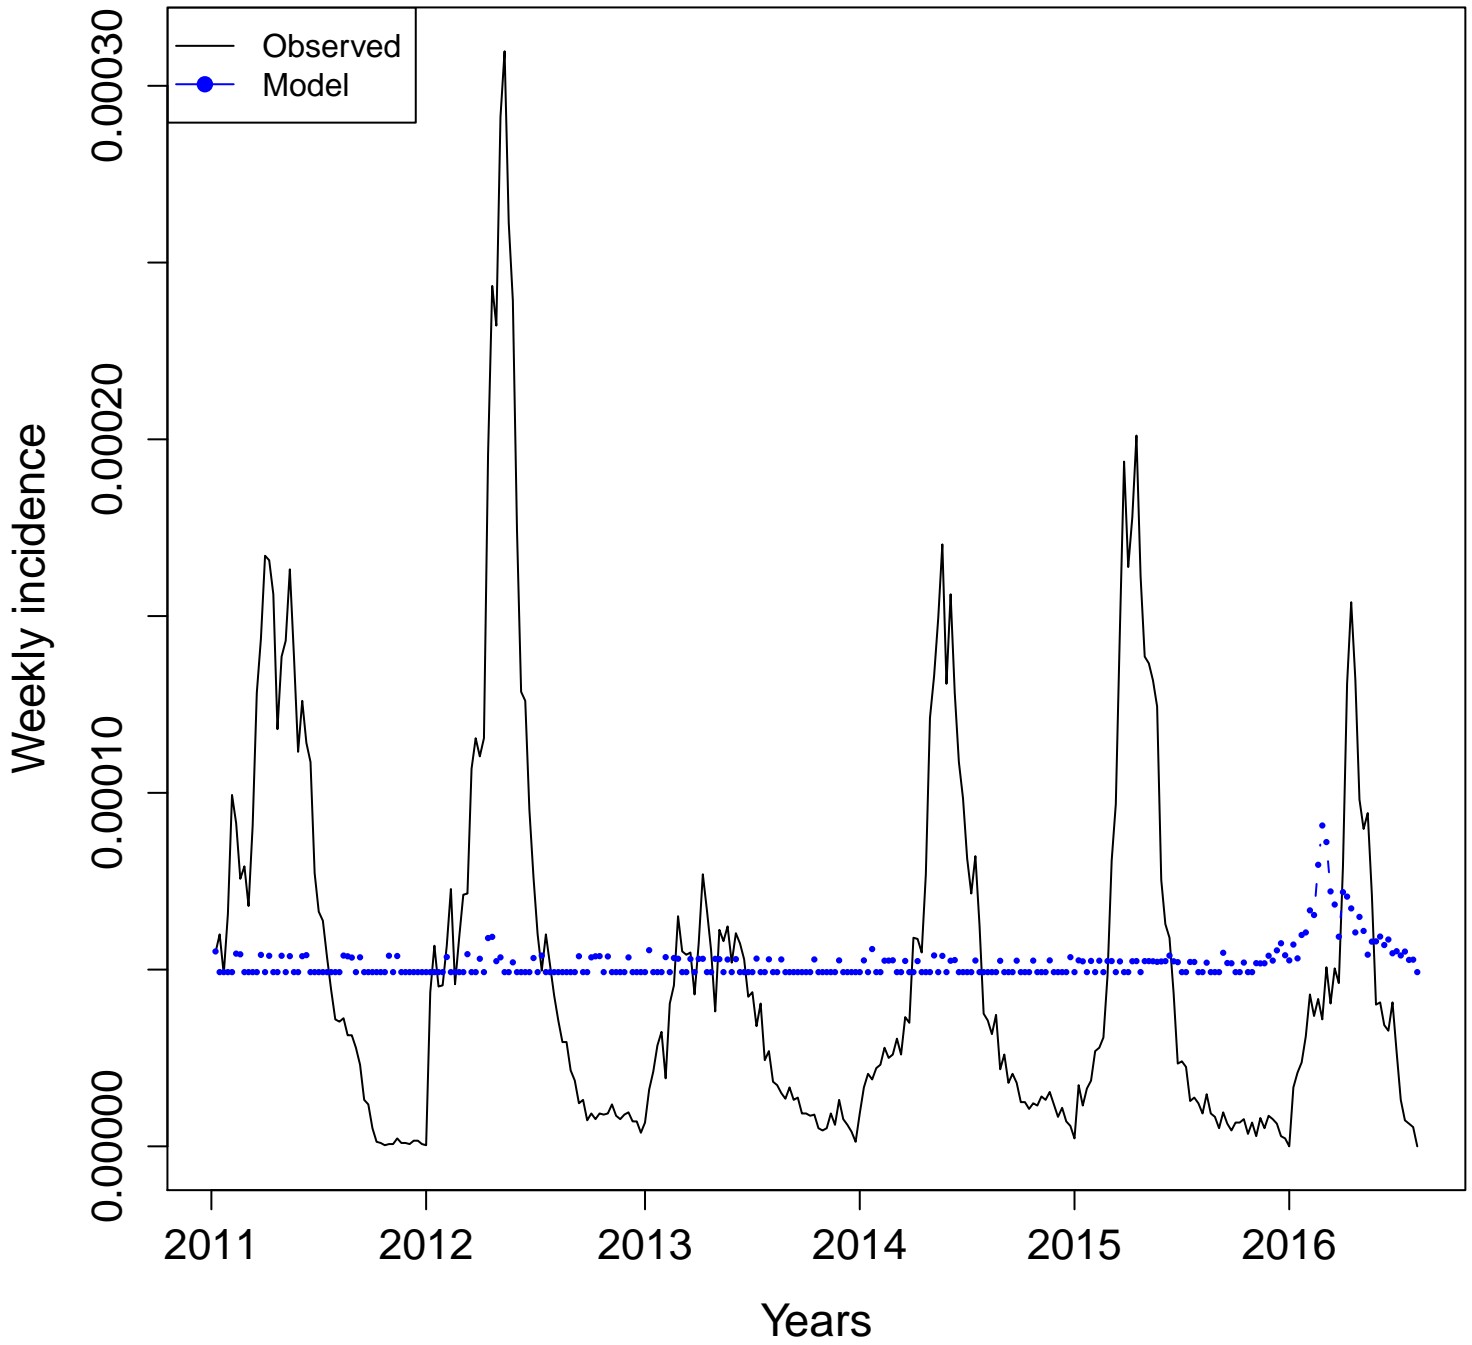

**PI- aedes**  
**Adj. R squared = 0.0074**

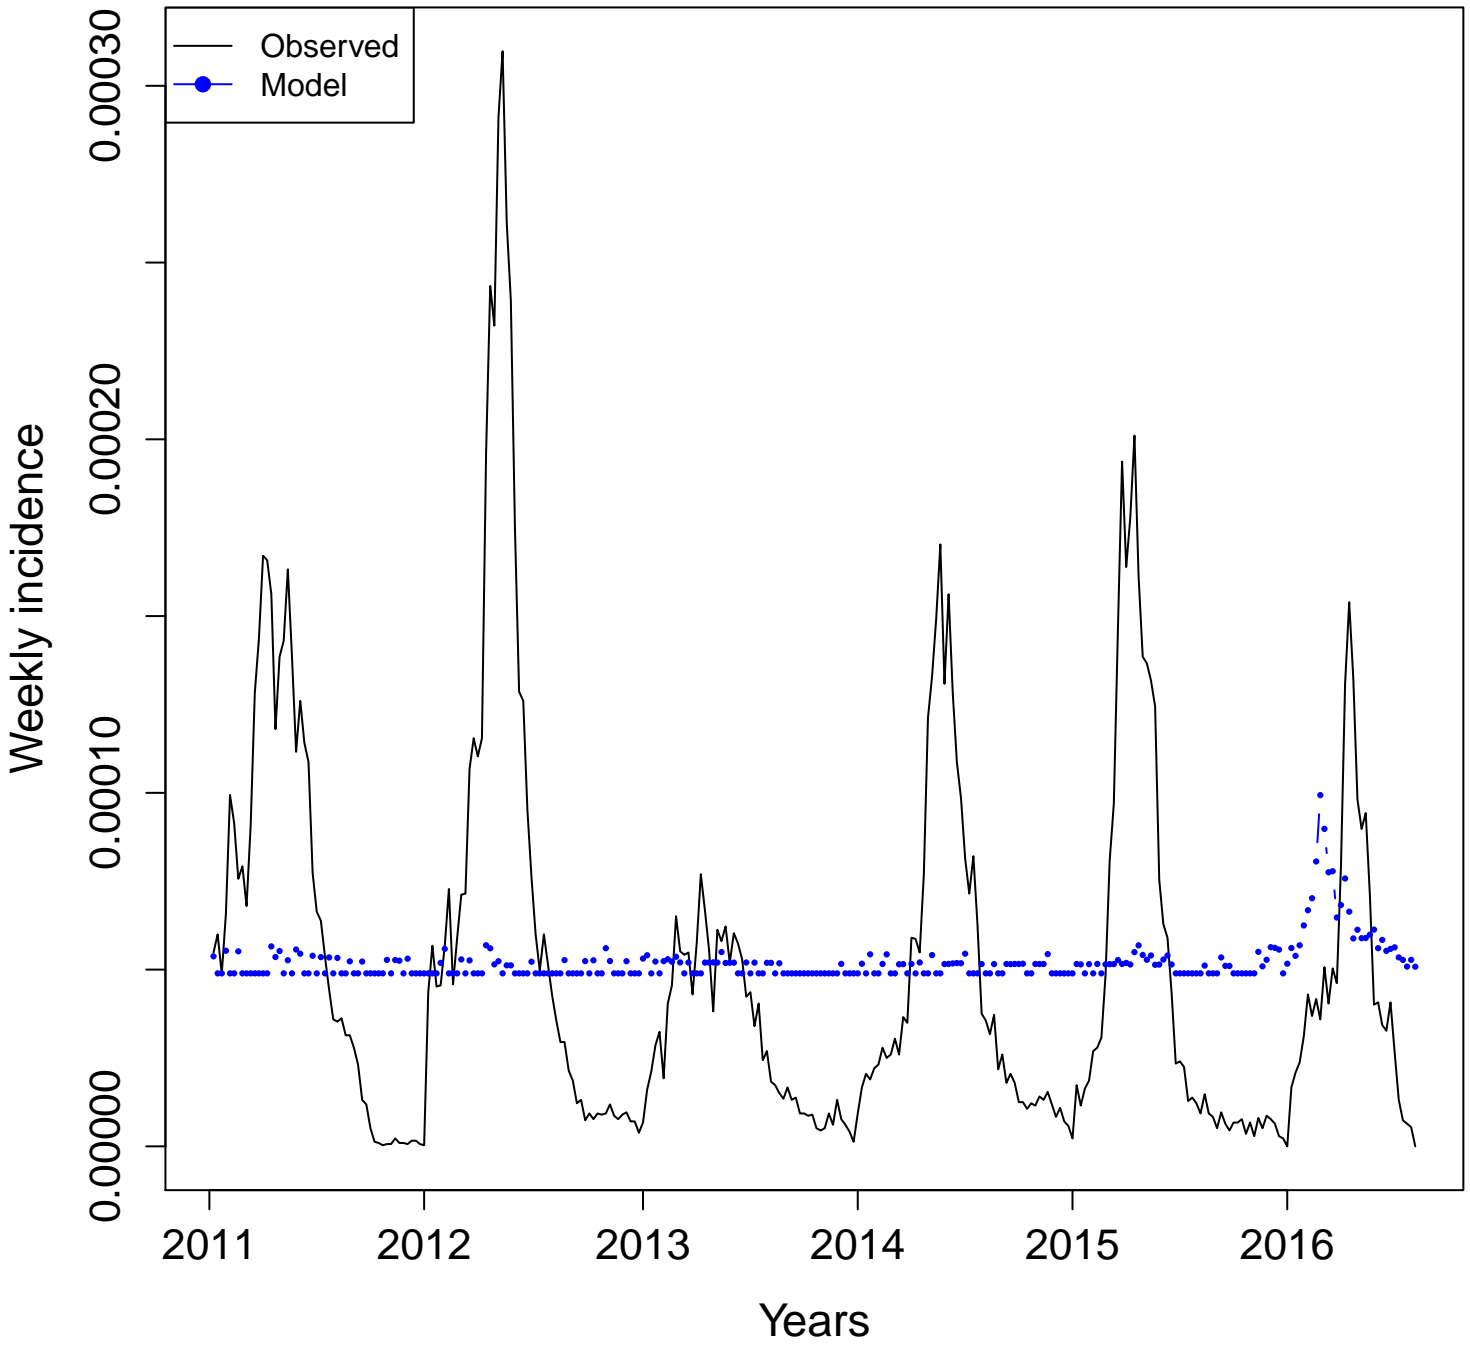

**PI- aegypti**  
**Adj. R squared = 0.0046**

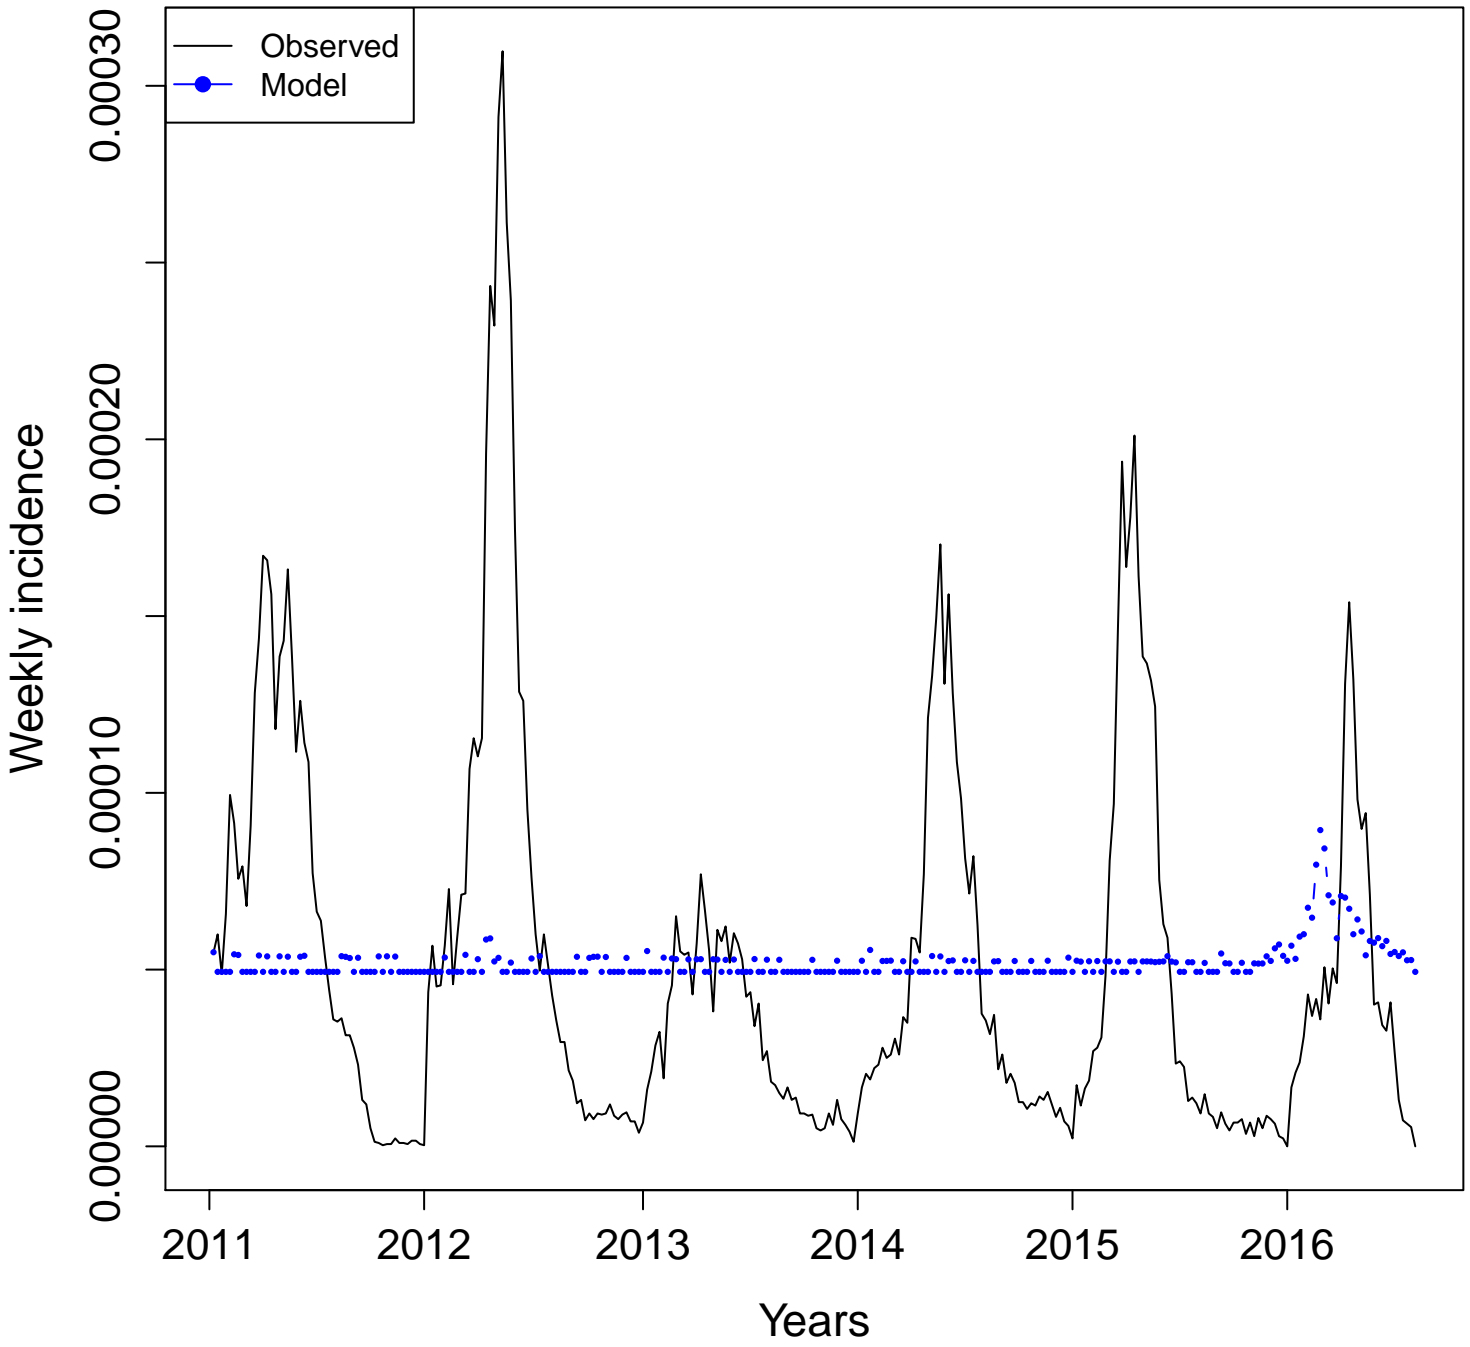

# PI- dengue

Adj. R squared = 0.269

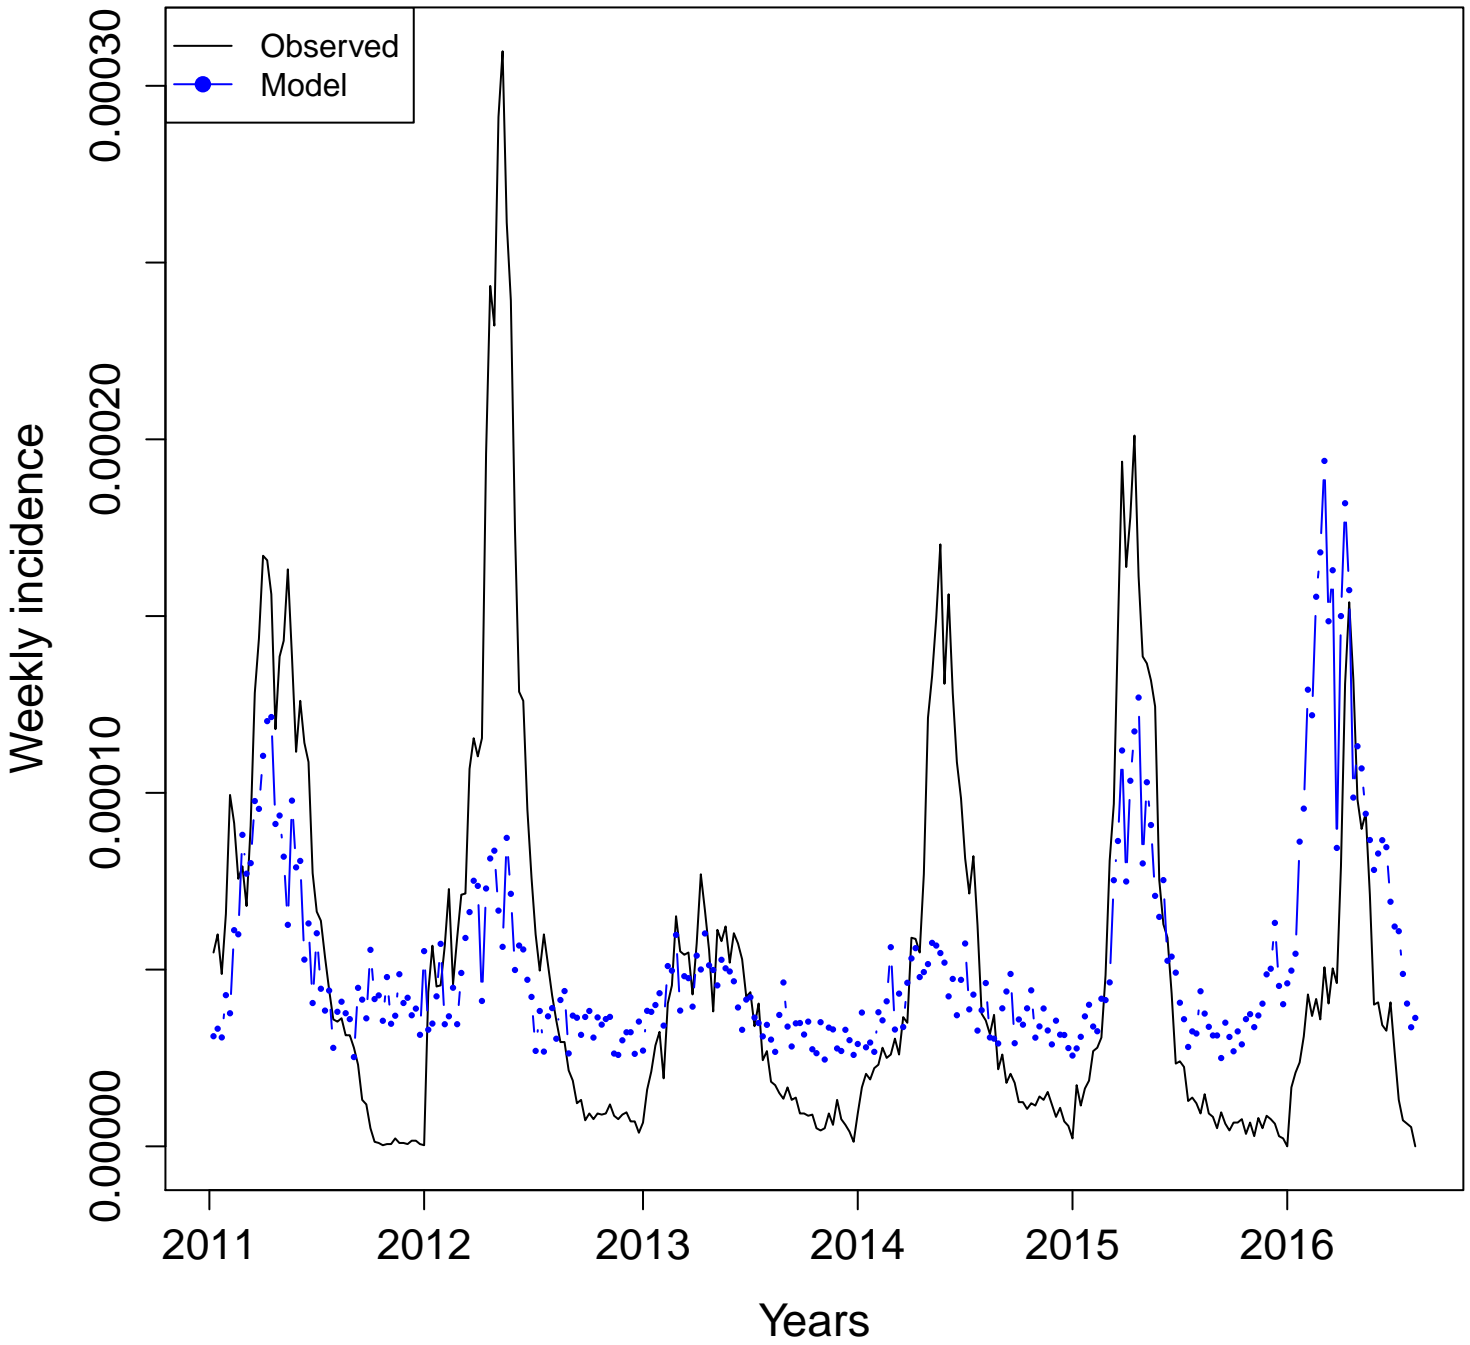

**PI- dengue.sintomas**  
**Adj. R squared = 0.3158**

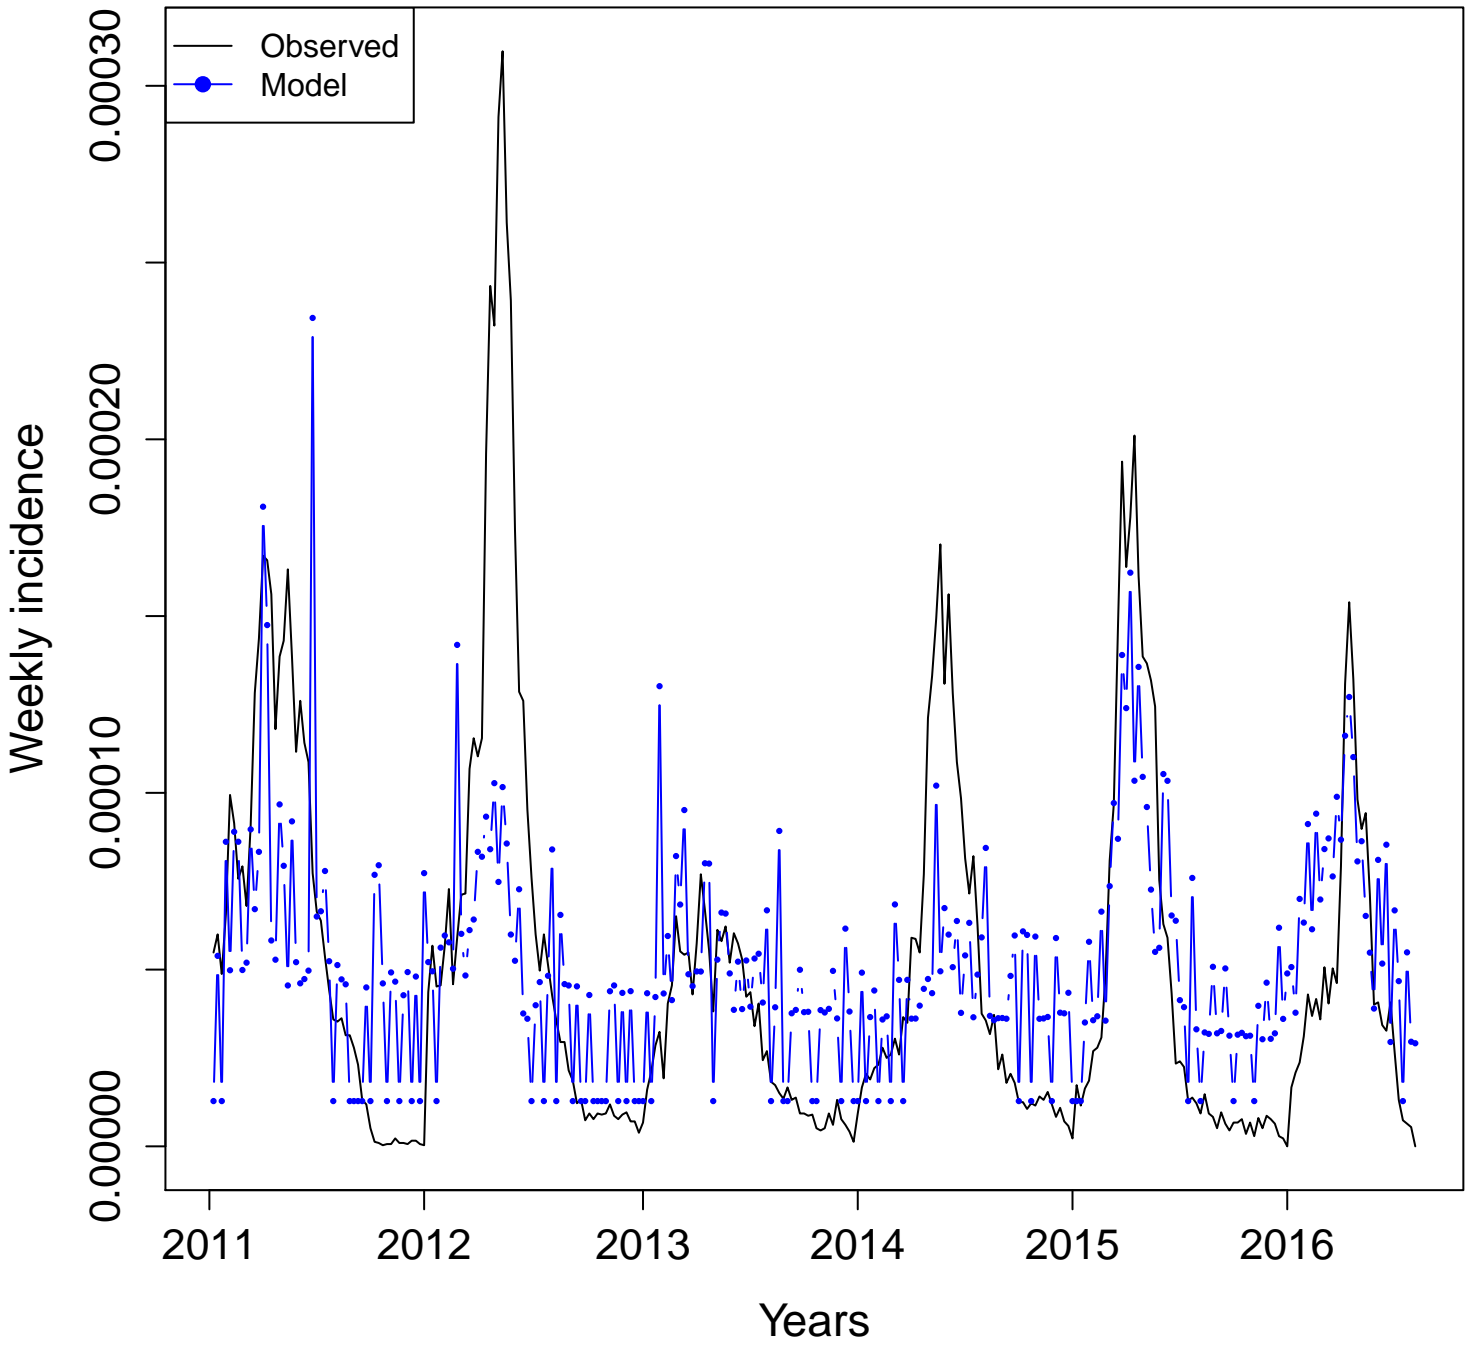

**PI- mosquito.dengue**  
**Adj. R squared = 0.0287**

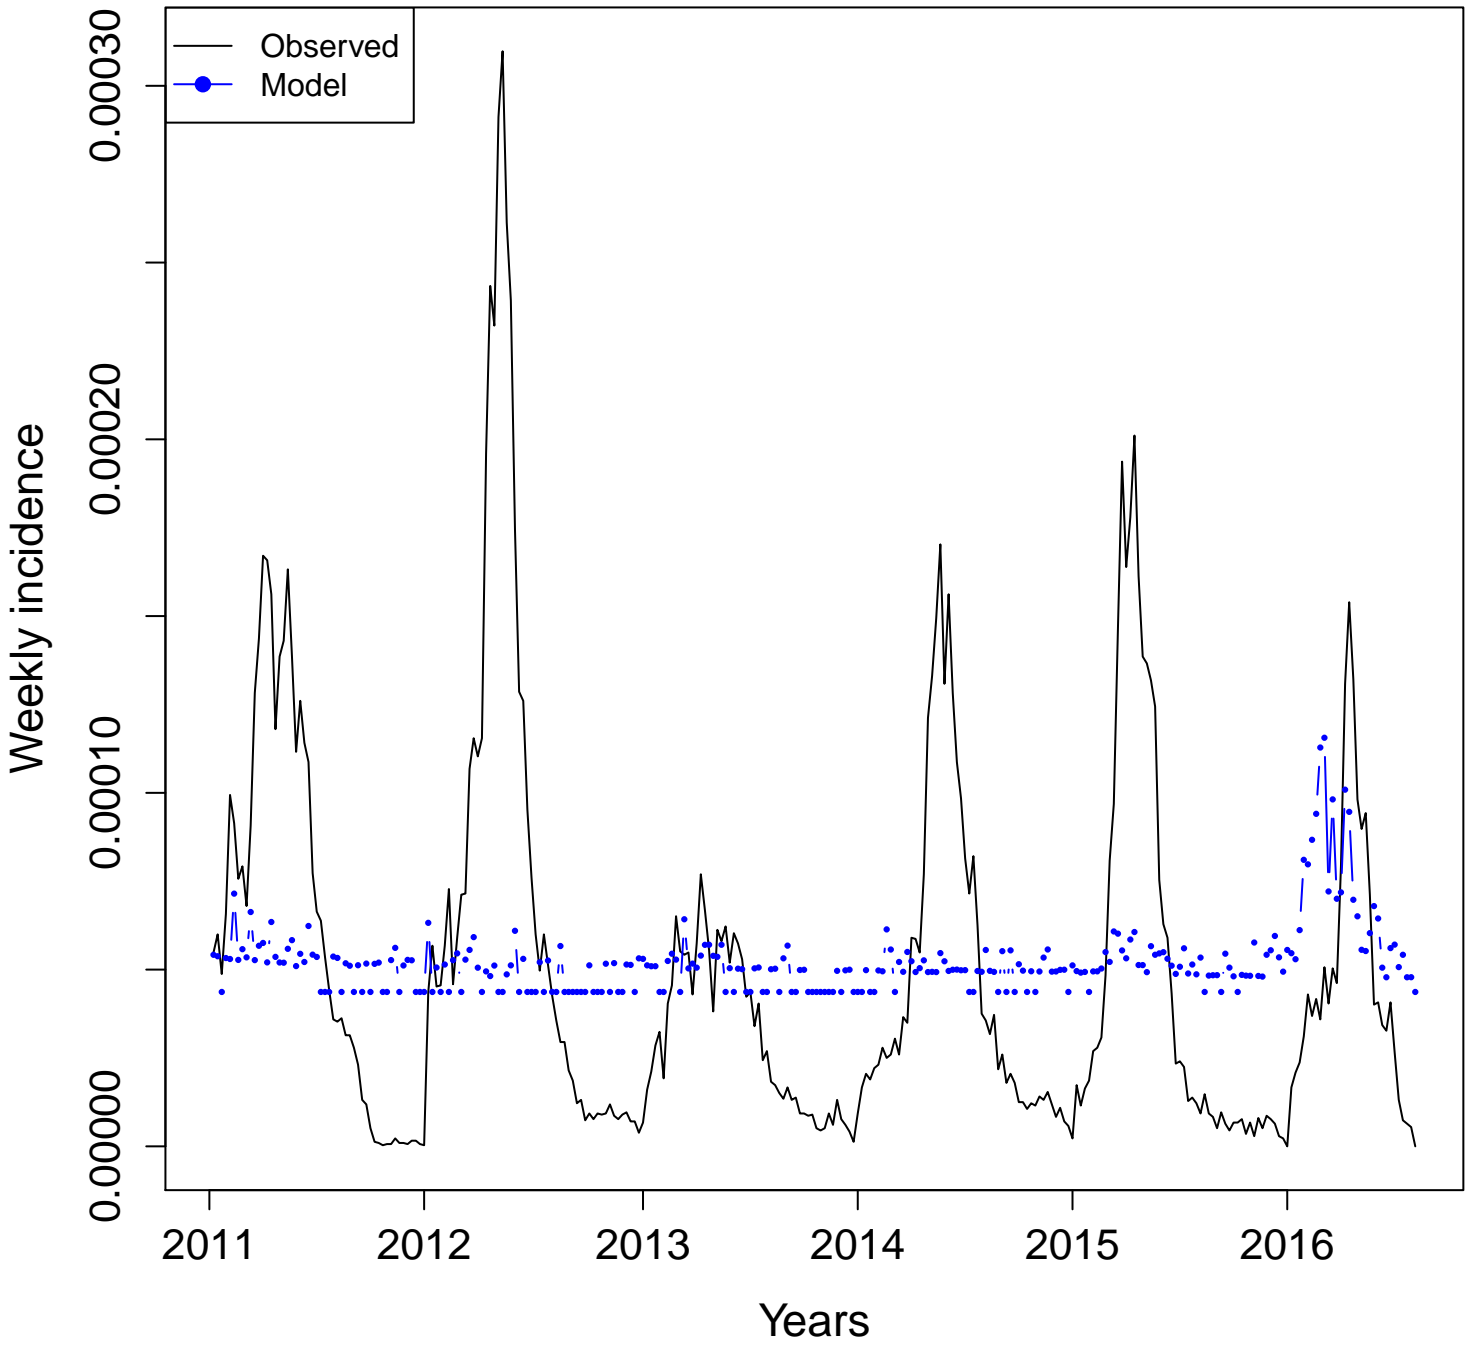

# PI- mosquito

Adj. R squared = 0.0166

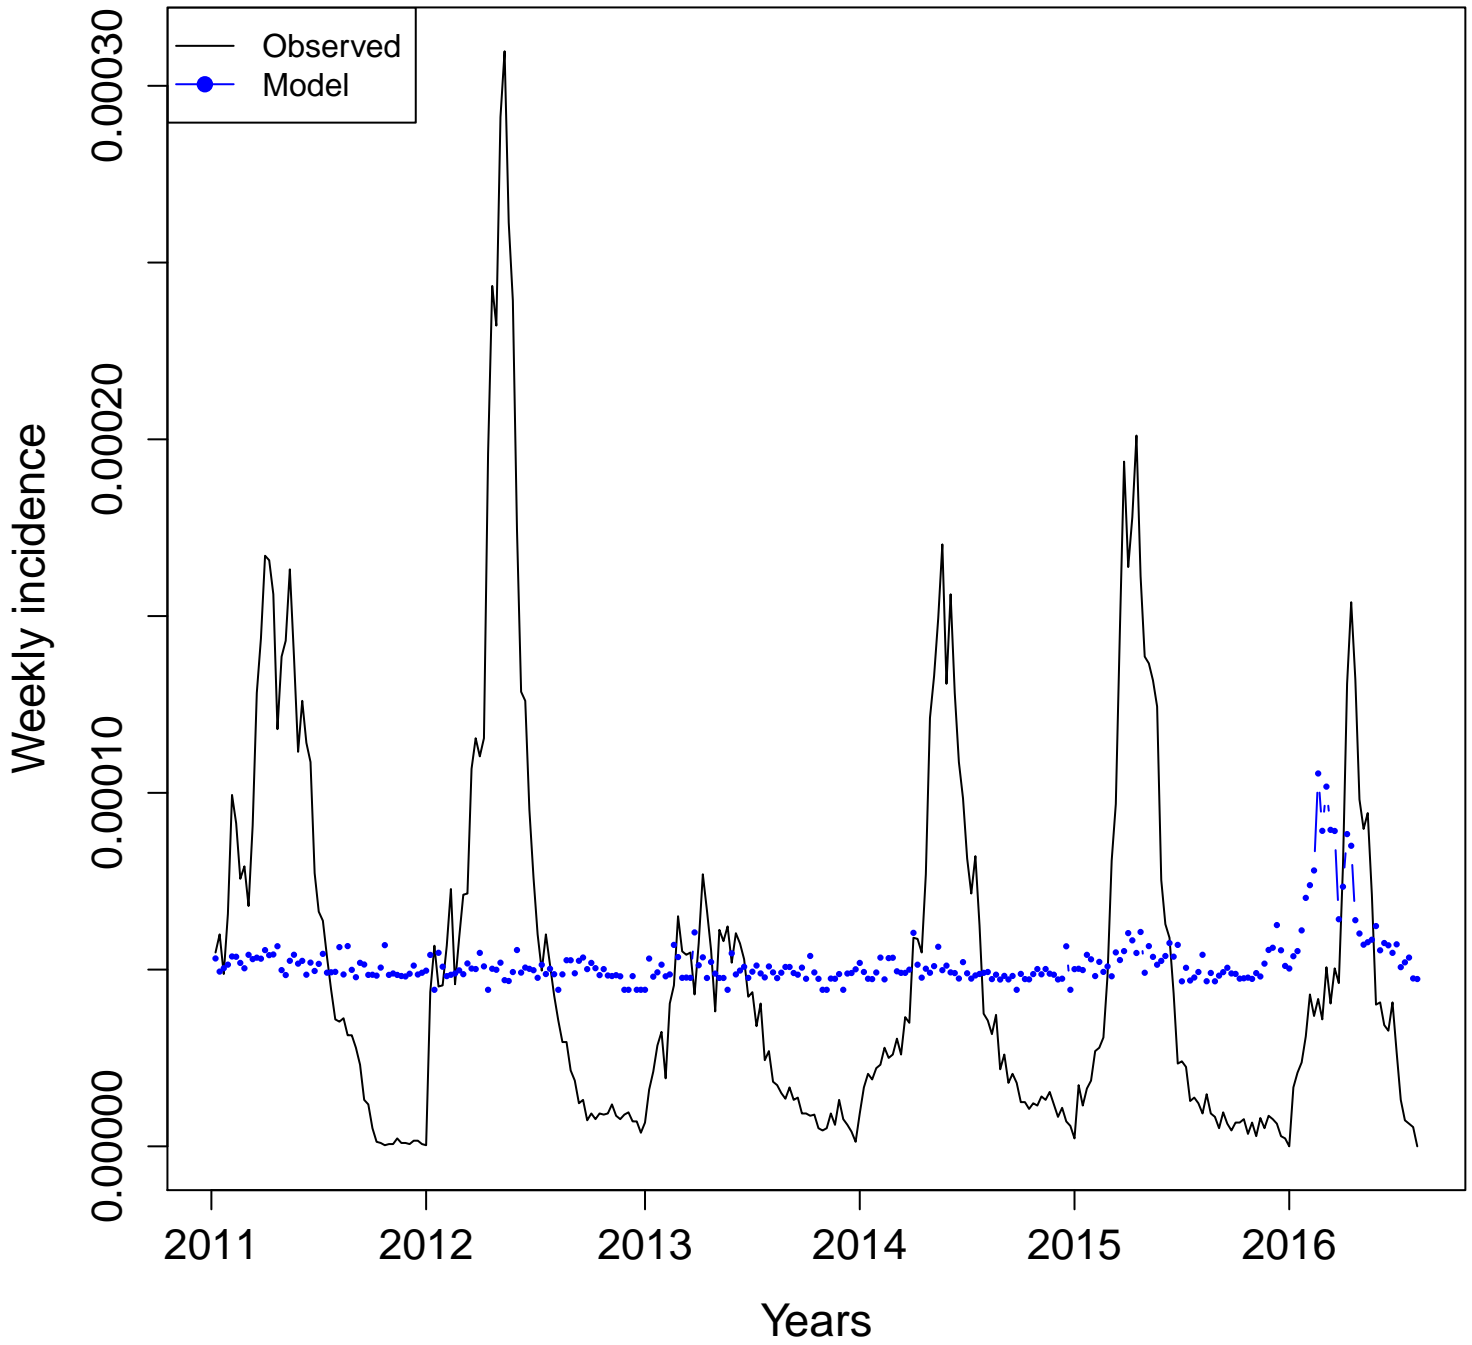

**PI- sintomas.da.dengue**  
**Adj. R squared = 0.2598**

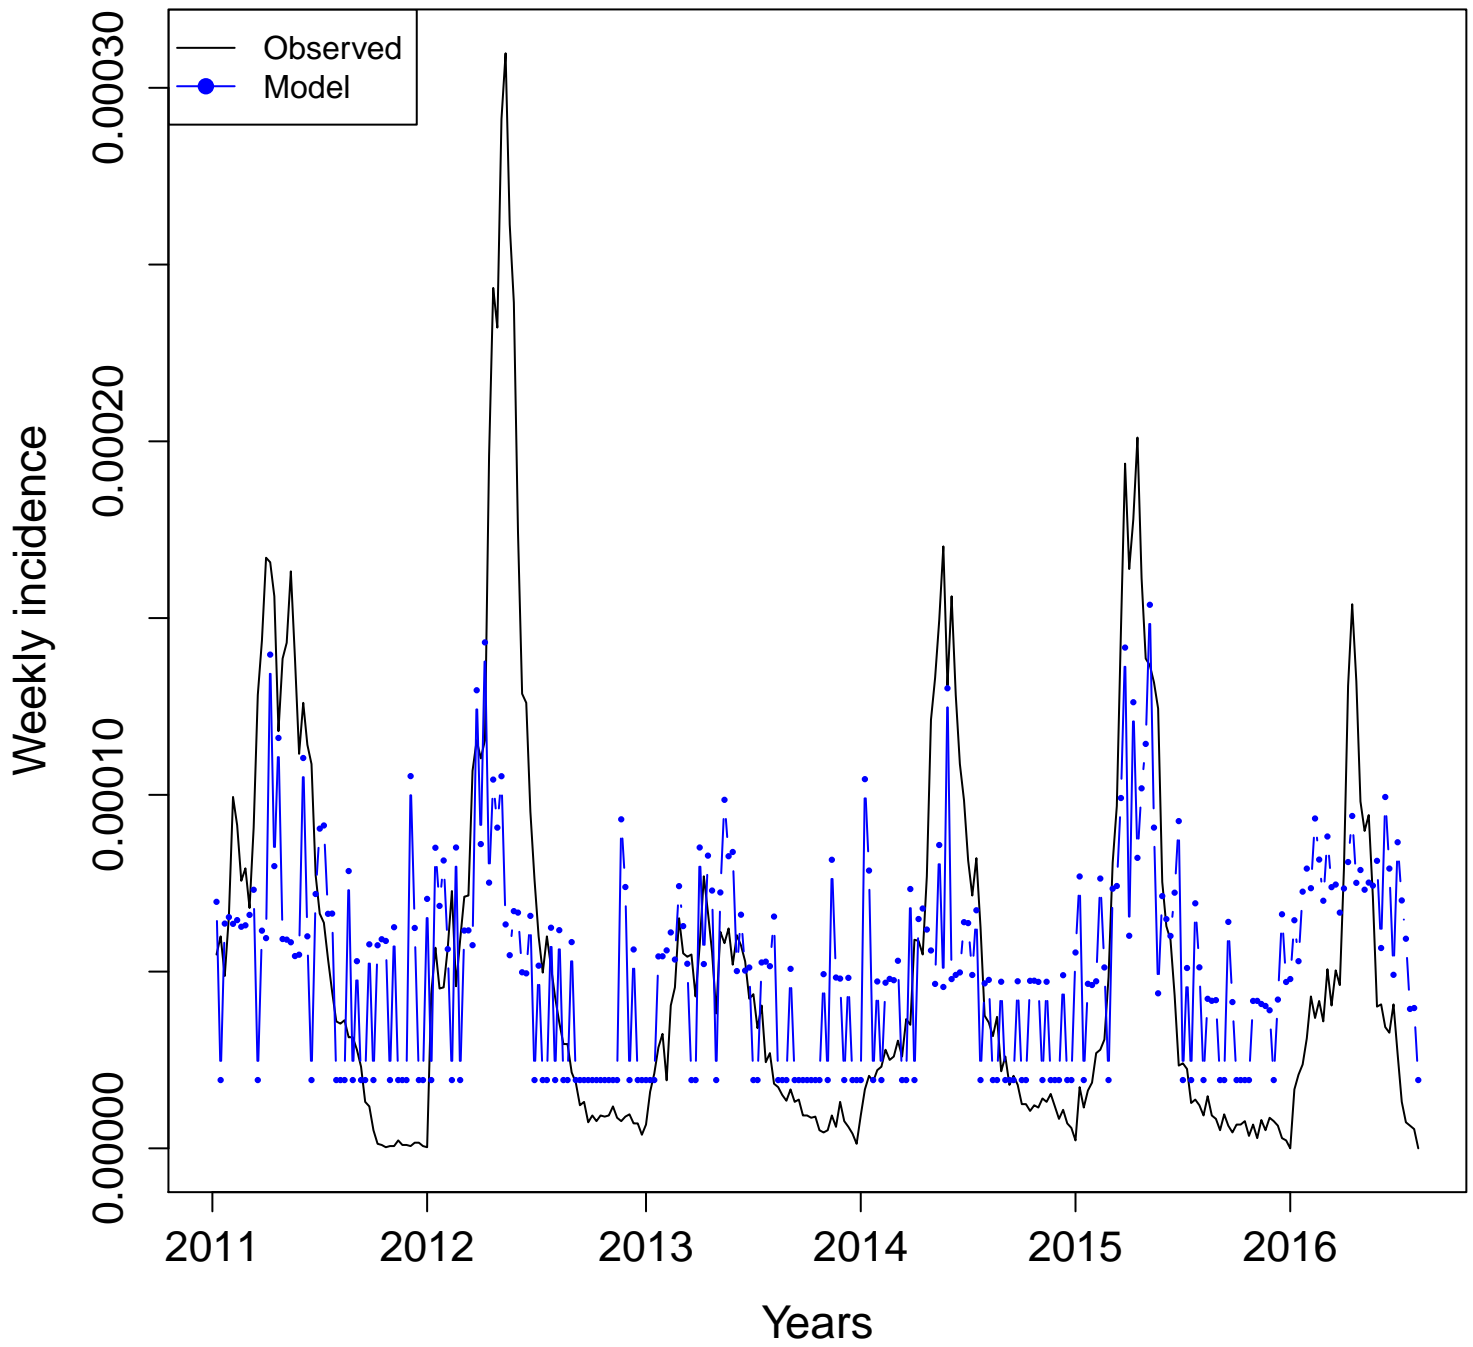



## Paraná (PR)

# Dengue incidence vs. Google Health Trends (2011–2016)

### Definitions:

- **Combined terms:**
  - **All:** model with all the available terms.  $n =$  number of terms
  - **Four:** model with "dengue", "dengue sintomas", "aedes", and "mosquito".
  - **Uncorrelated:** model with non-correlated terms.  $n =$  number of uncorrelated terms
- **Individual terms:** Plots developed with one term at a time.
- Terms for all and uncorrelated models can be found in additional file 3.

**Combined terms**  
**Adjusted R squared**

**Paraná (PR)**

All  
(n = 12)

BR-PR  
Adj. R squared = 0.8447

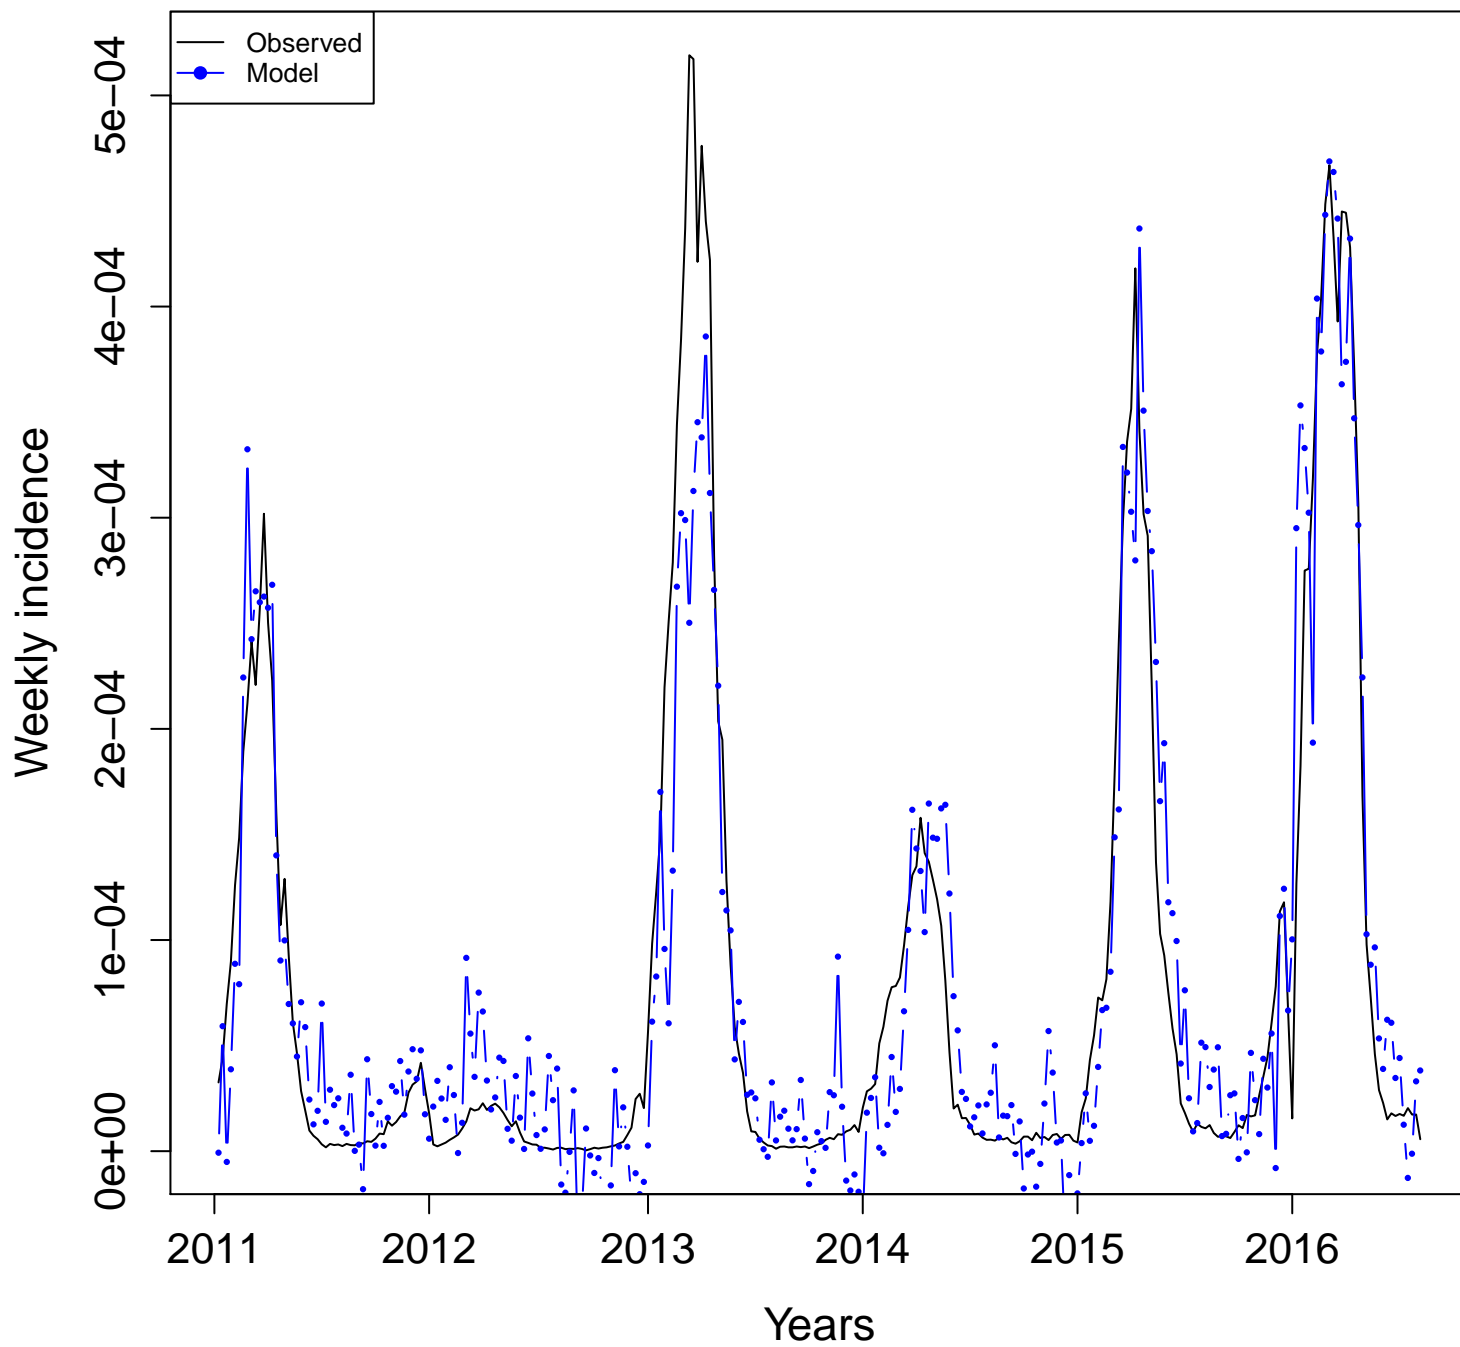

**BR-PR**  
**Adj. R squared = 0.8214**

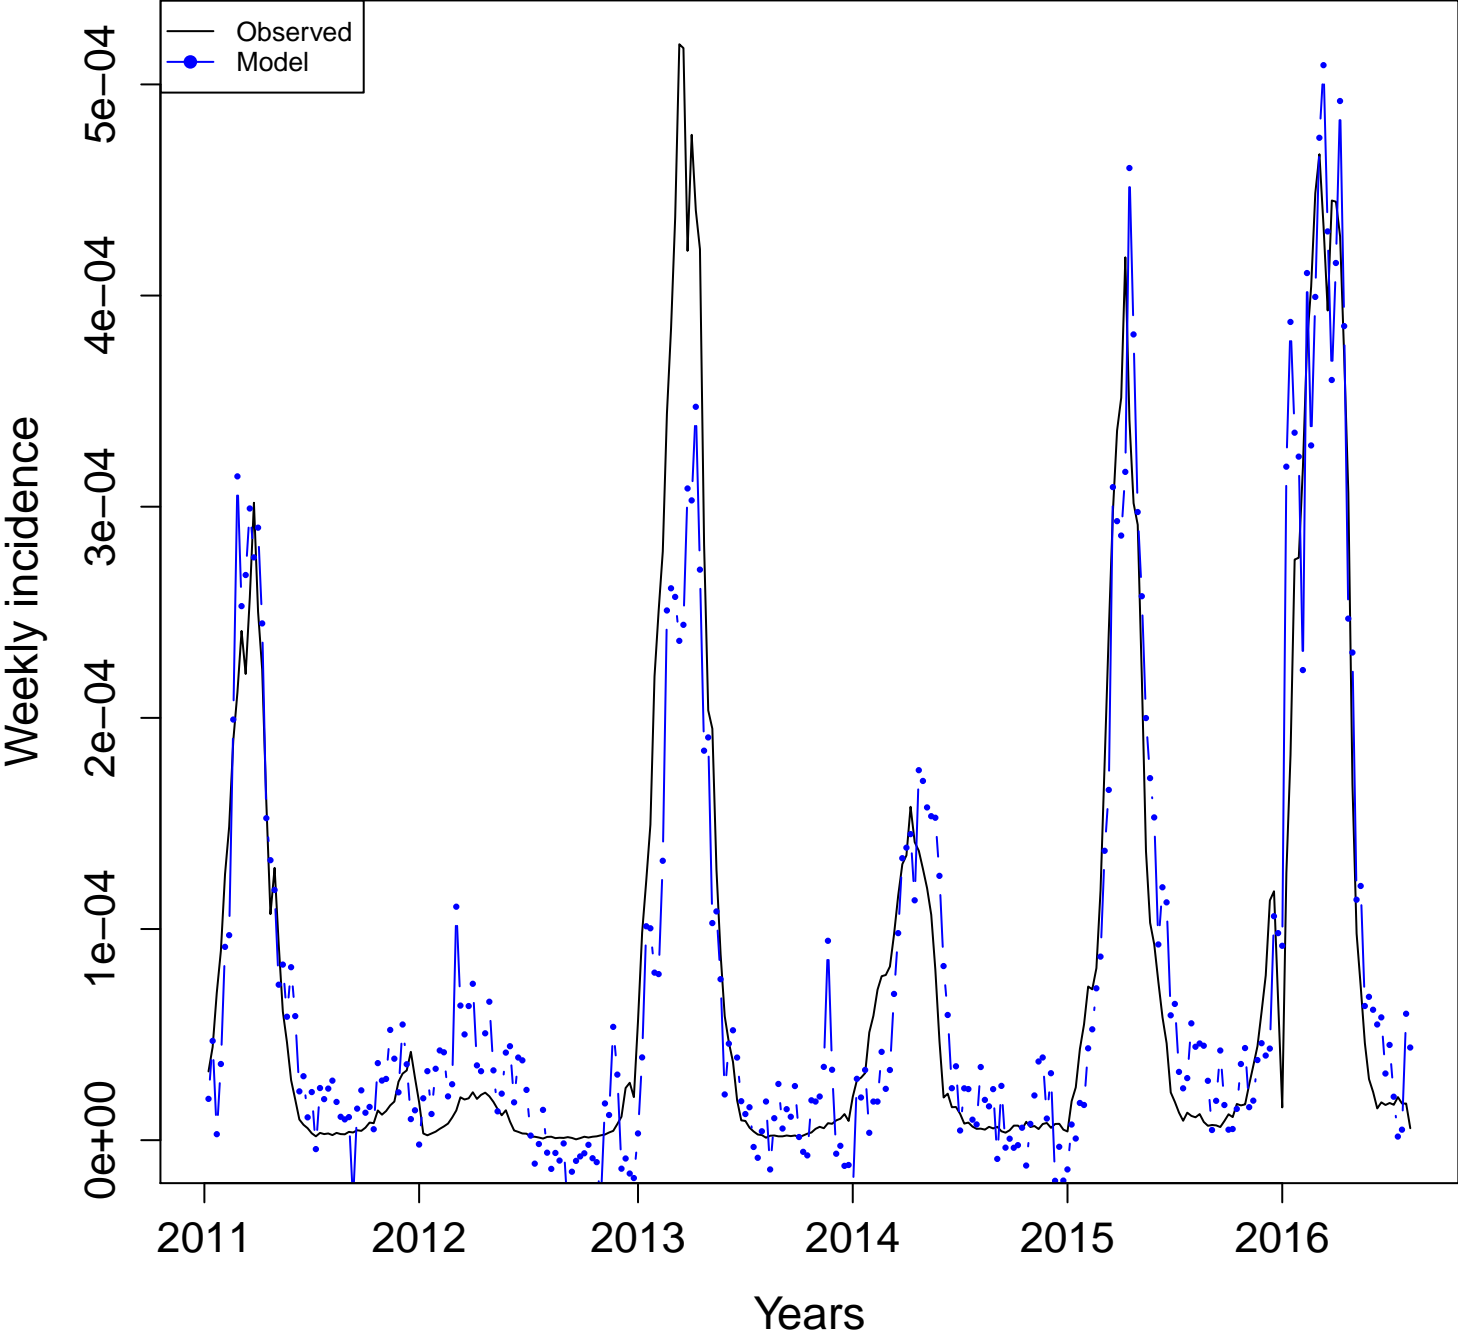

**Uncorrelated  
(n = 4)**

**BR-PR  
Adj. R squared = 0.7408**

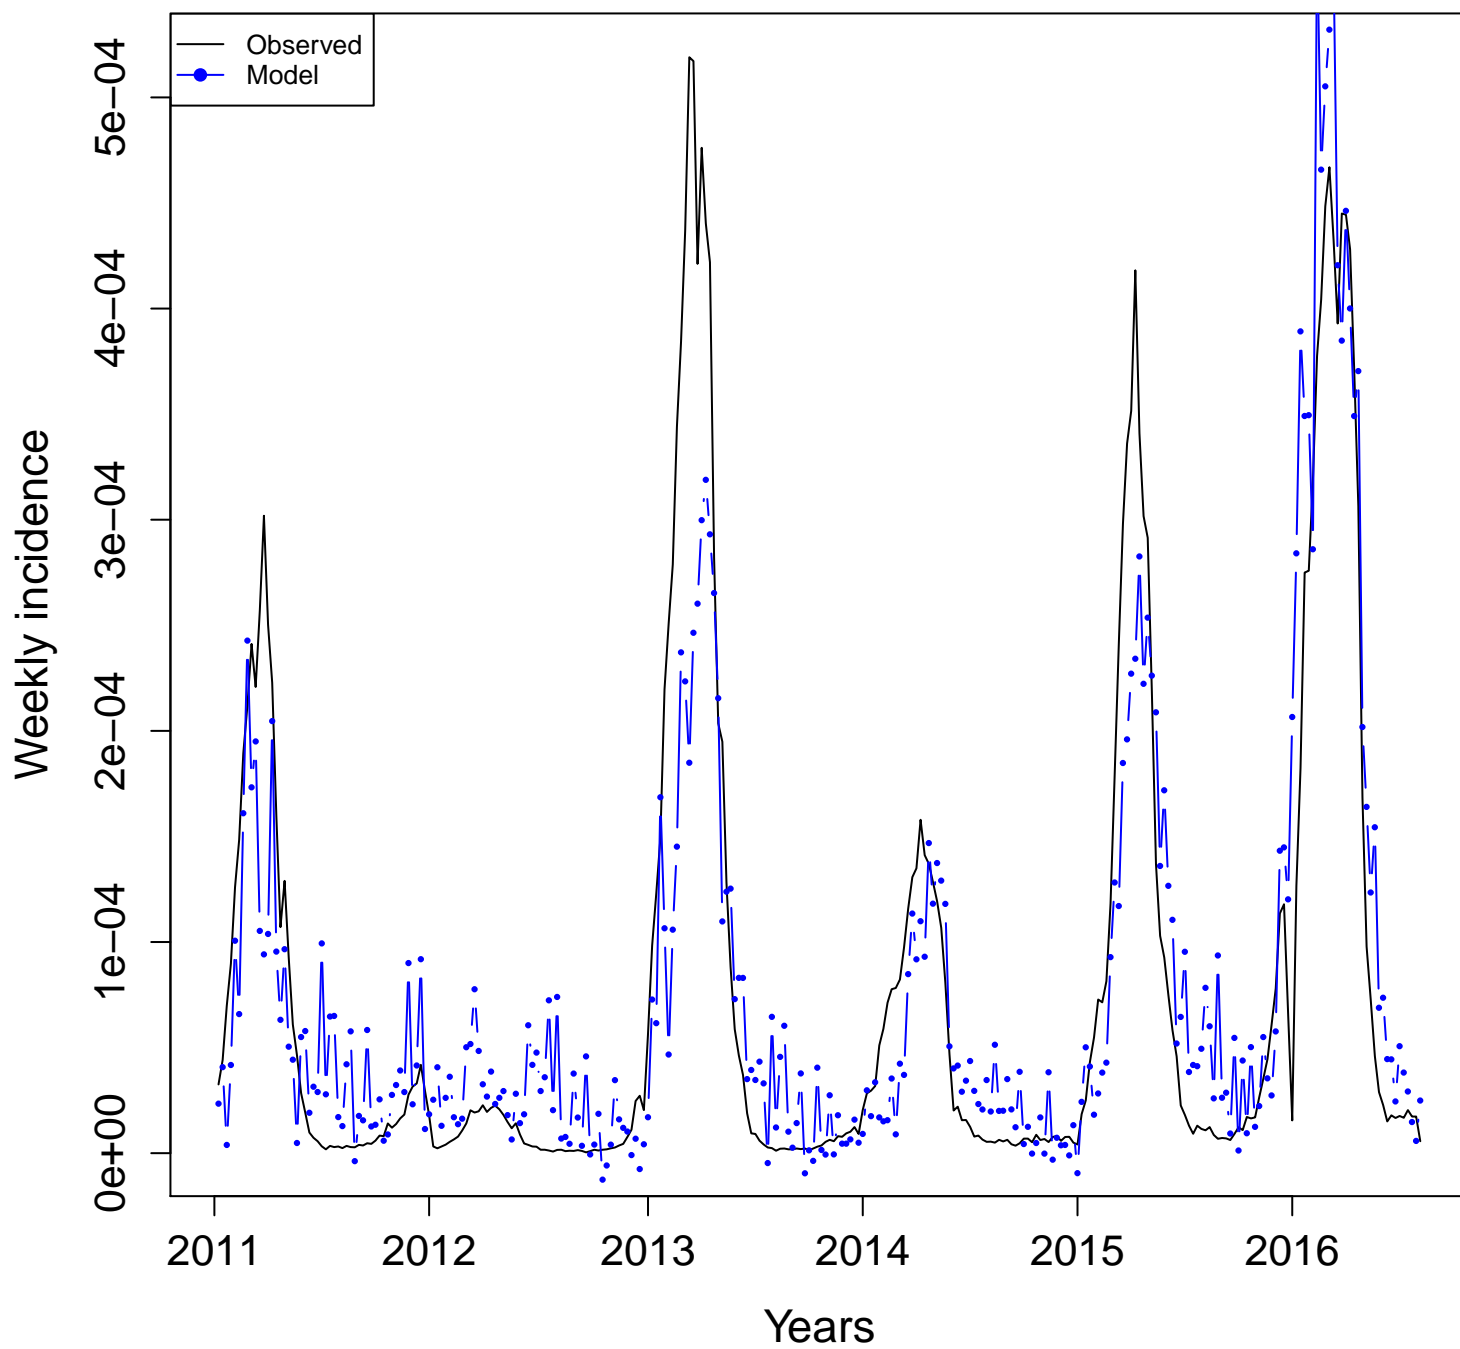

**Individual terms**  
**Adjusted R squared**

**Paraná (PR)**

**PR- aedes.aegypti**  
**Adj. R squared = 0.3262**

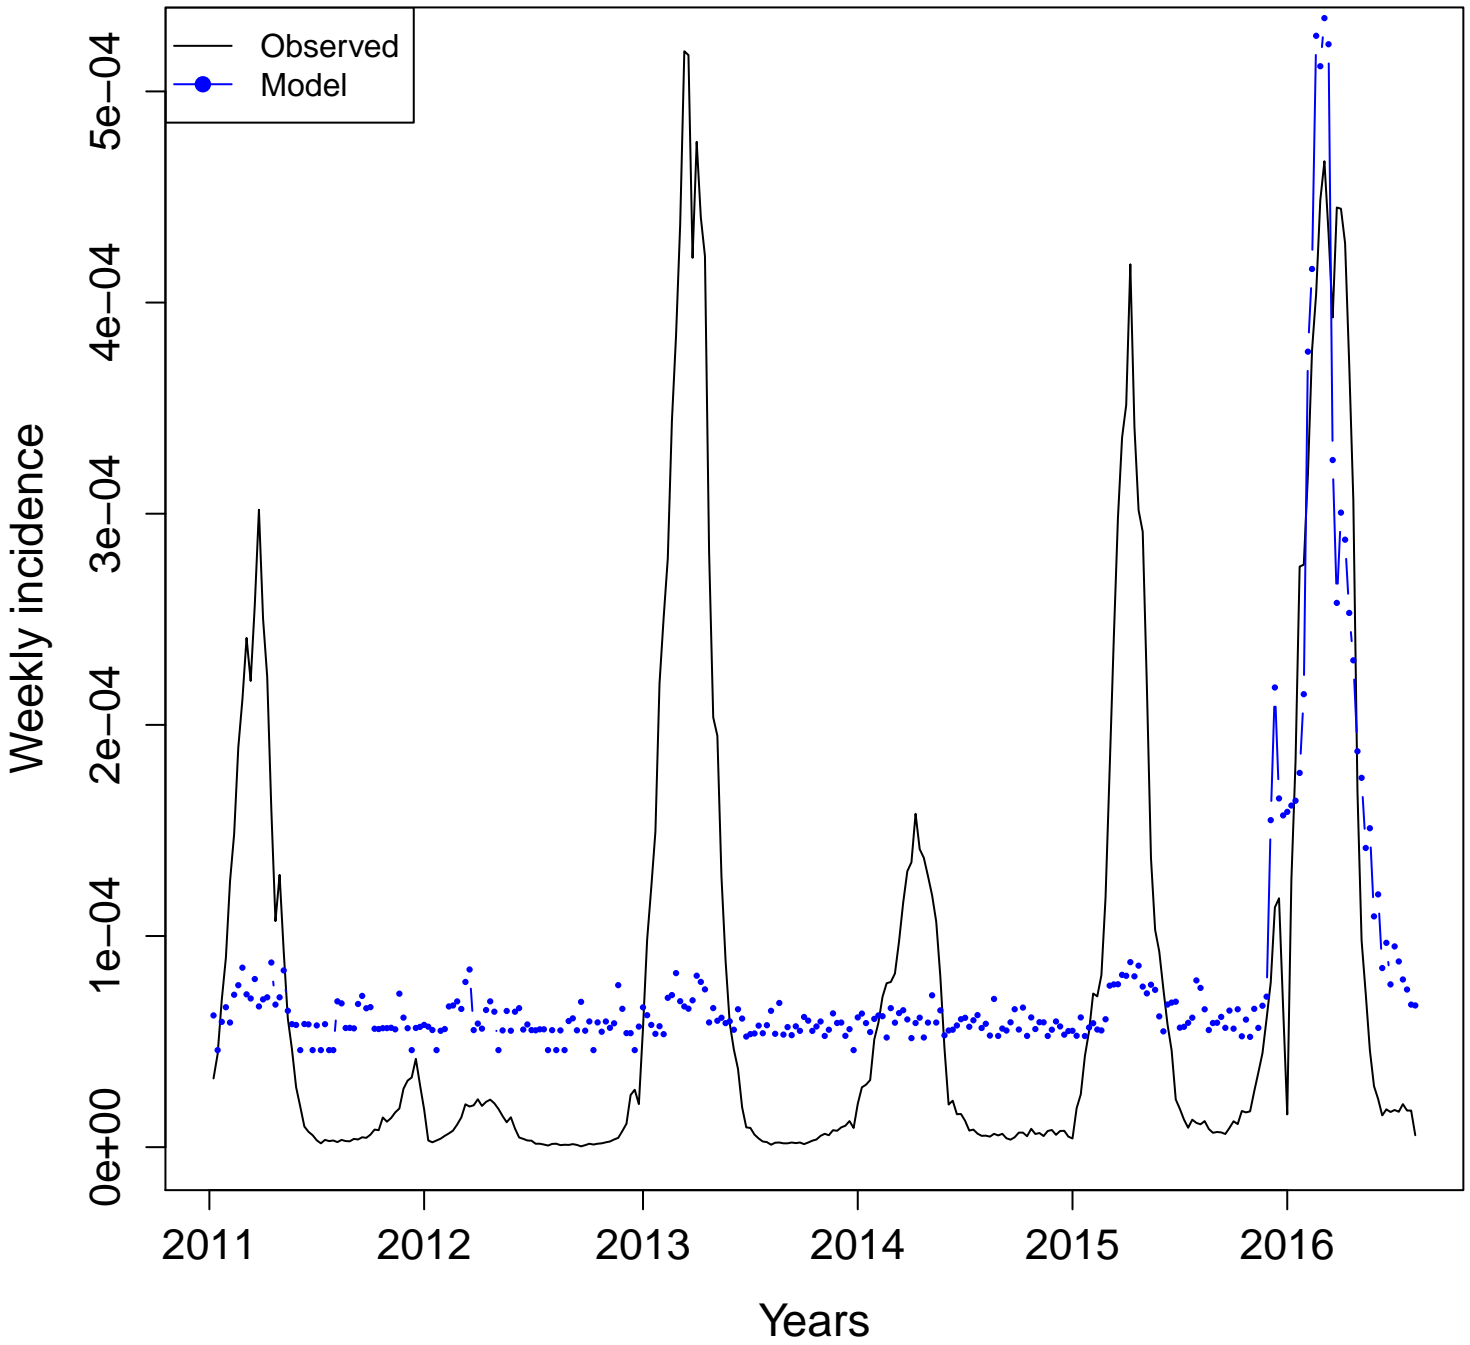

**PR- aedes**  
**Adj. R squared = 0.3257**

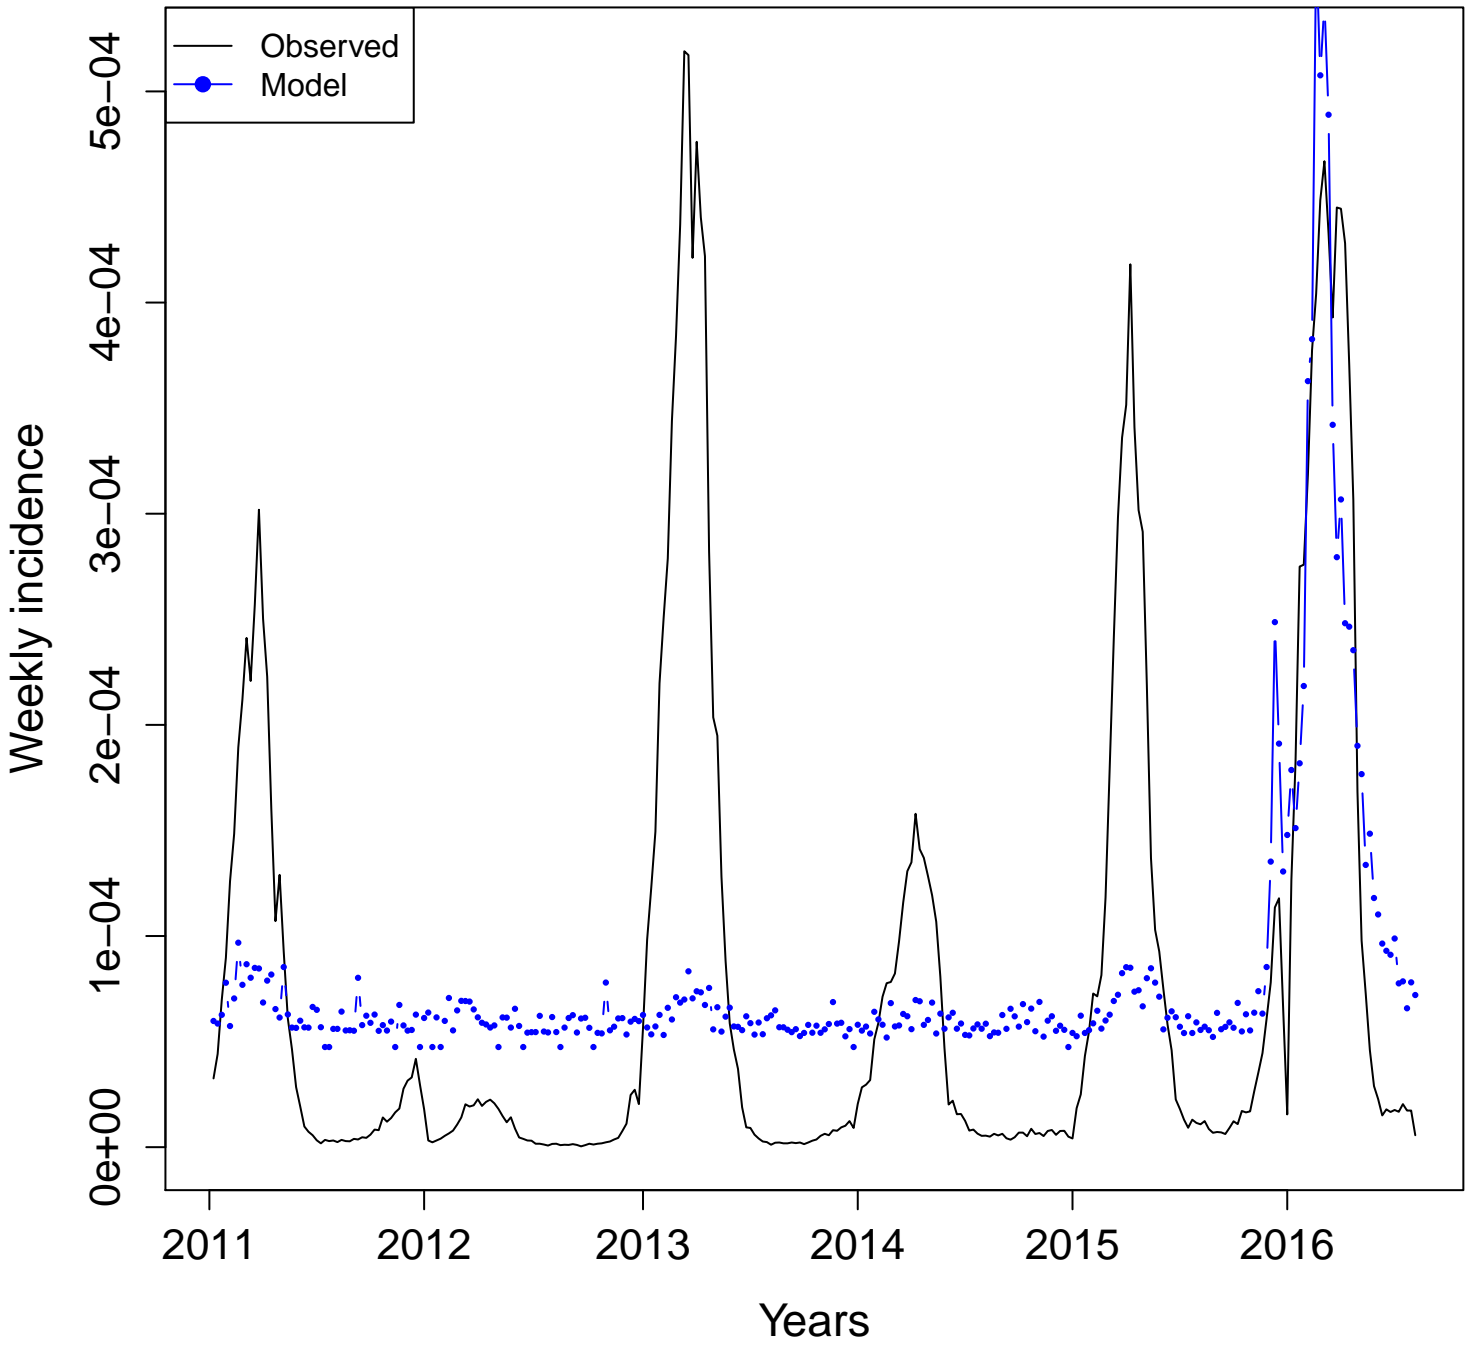



**PR- aegypti**  
**Adj. R squared = 0.3259**

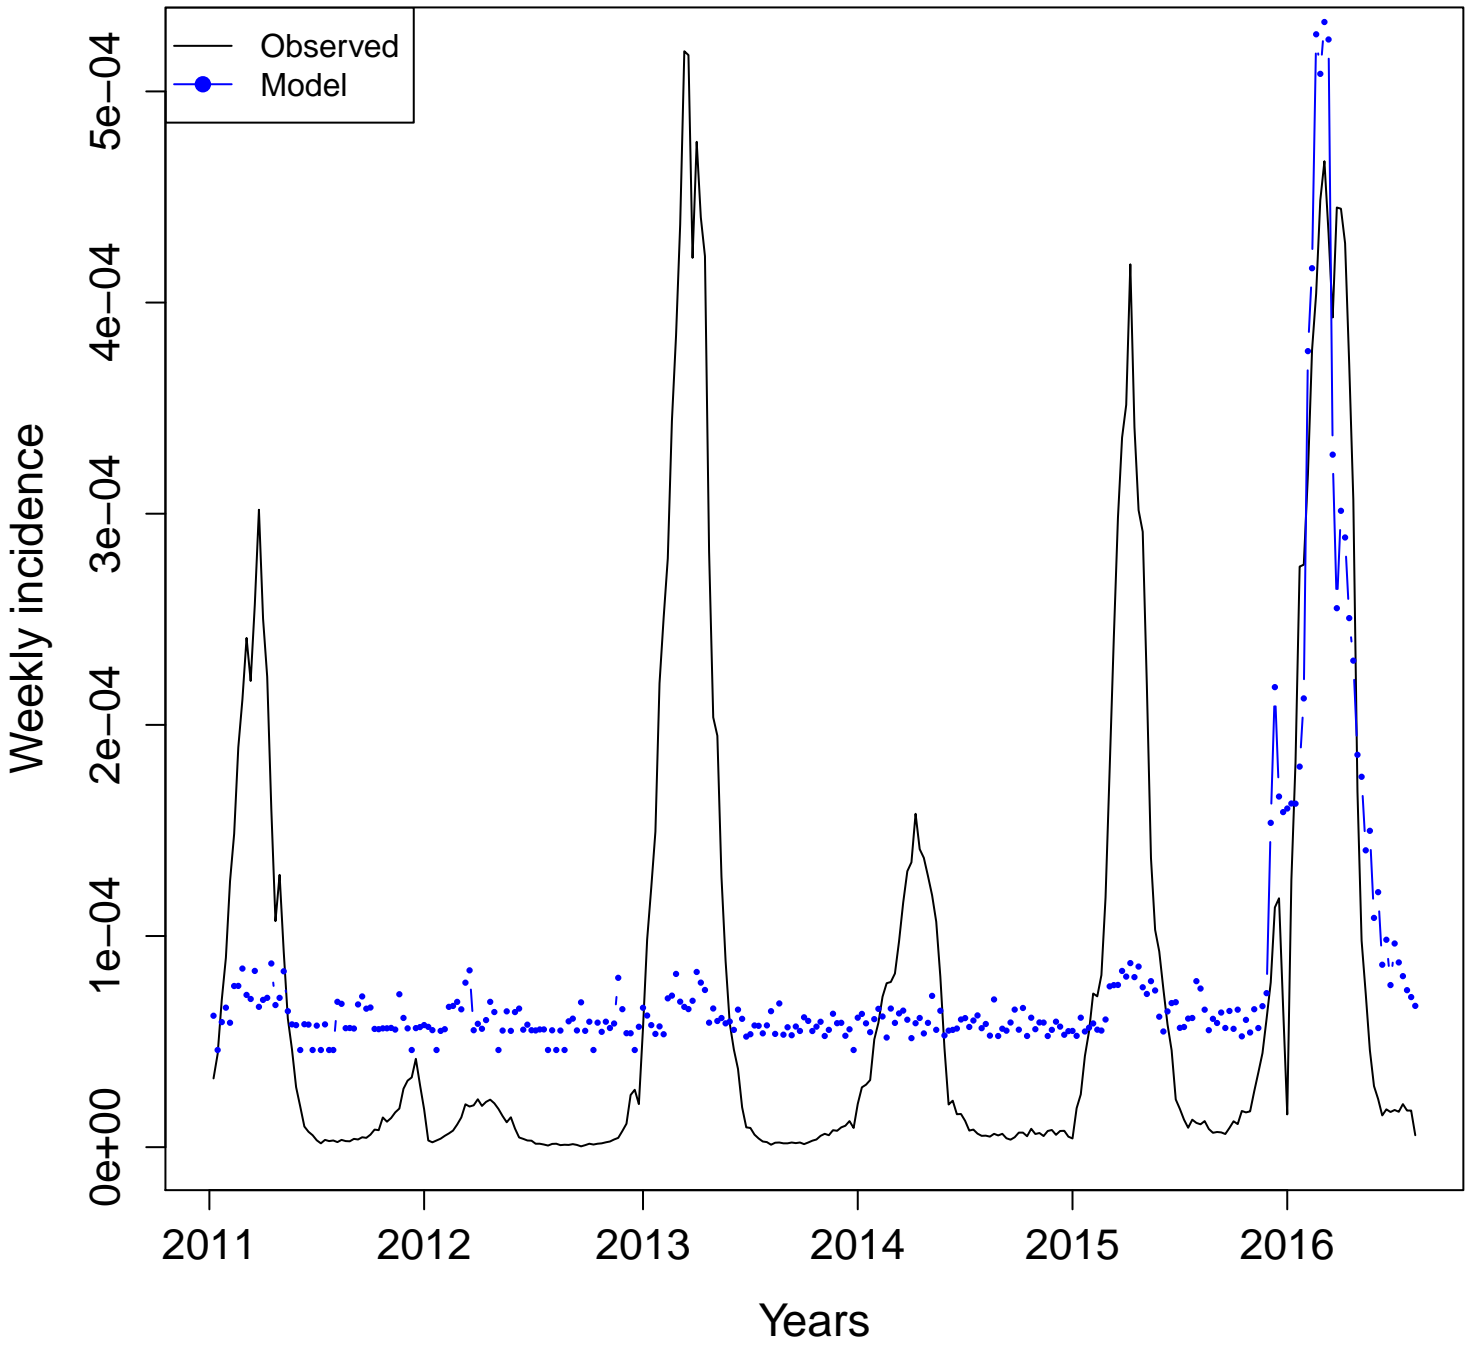

**PR- dengue.fever**  
**Adj. R squared = 0.1614**

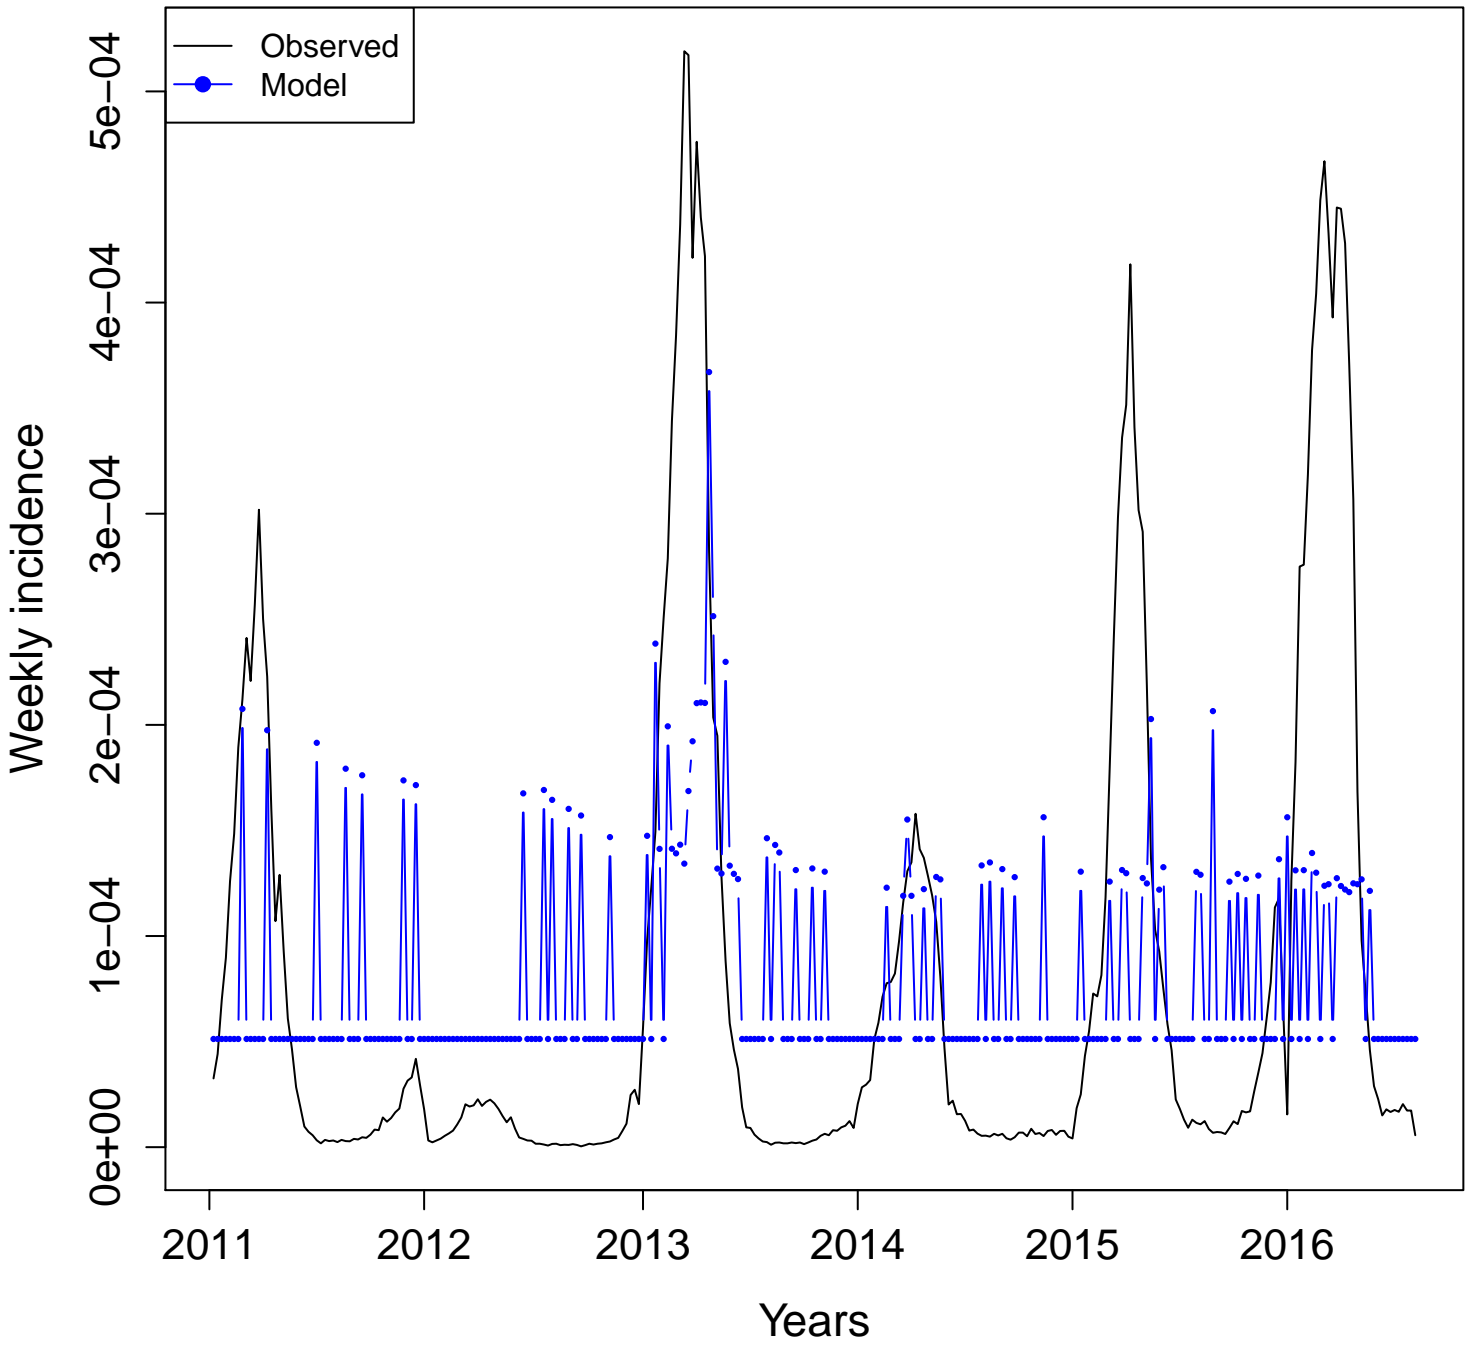

**PR- dengue**  
**Adj. R squared = 0.6981**

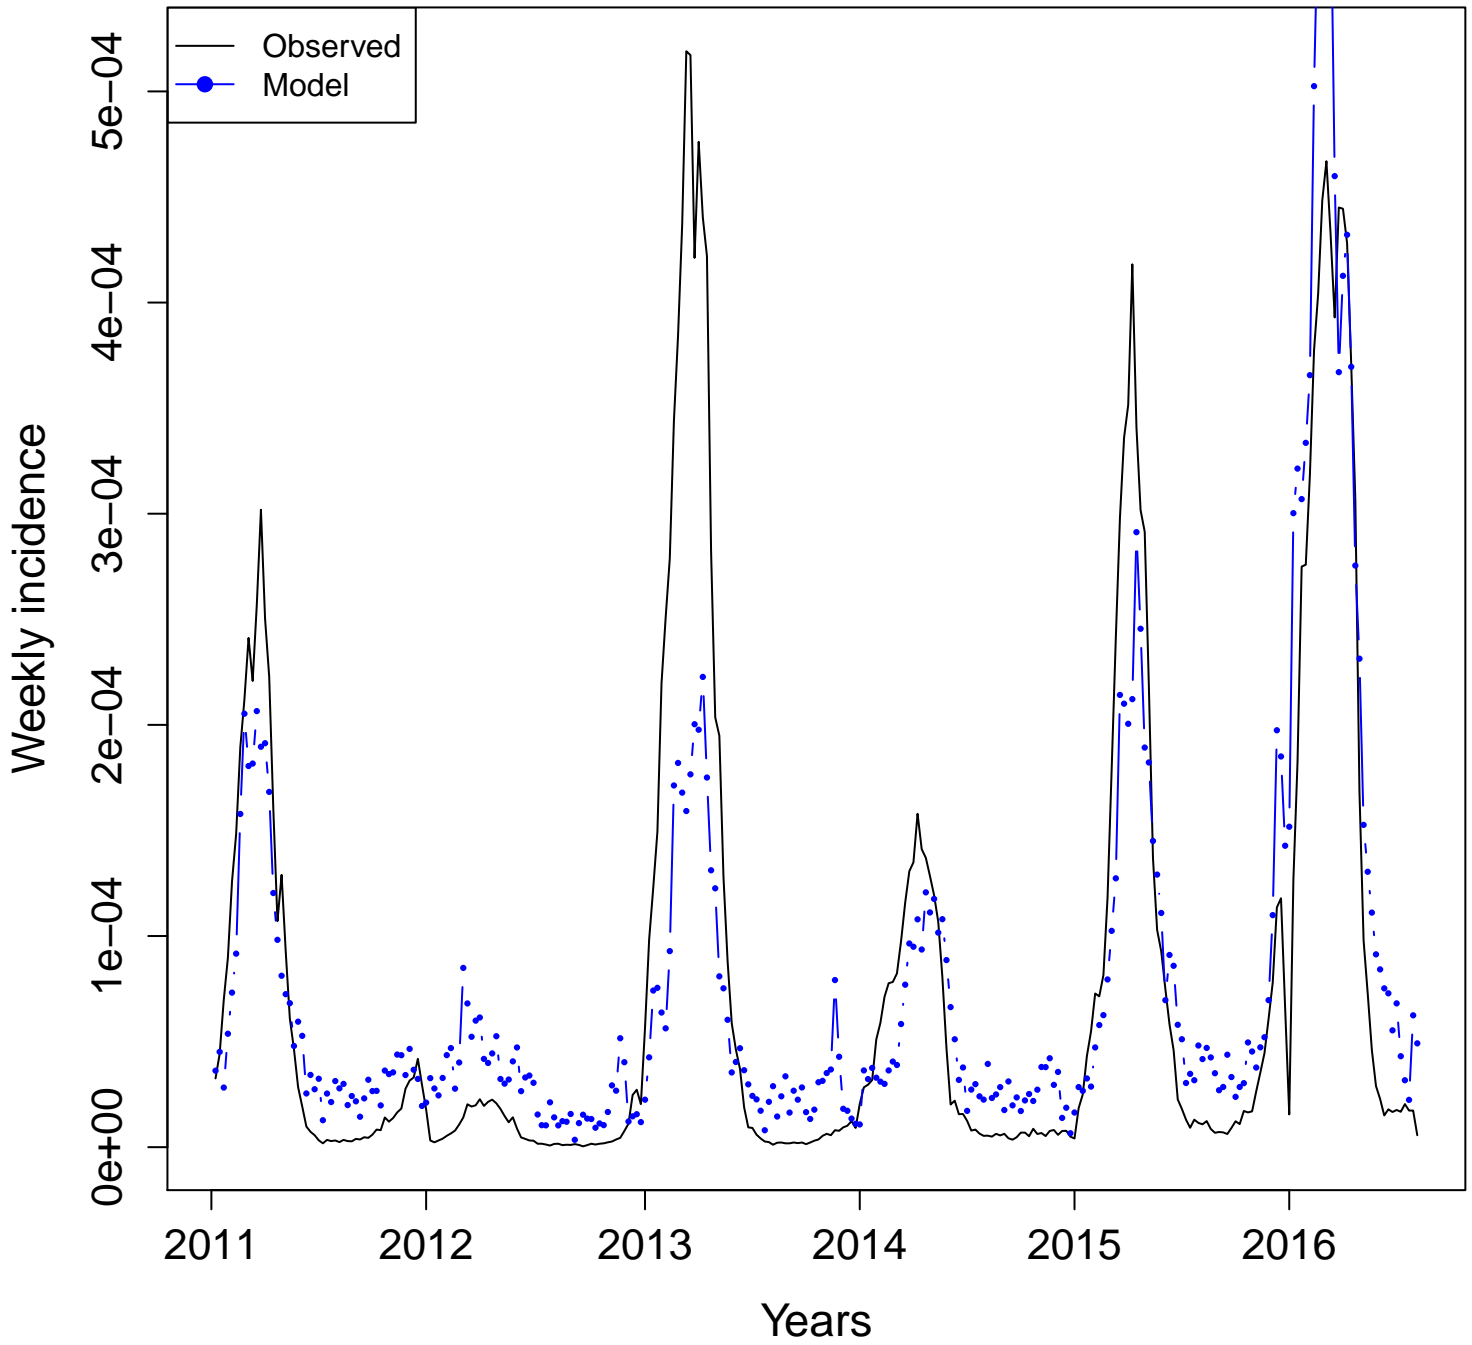

**PR- dengue.sintomas**  
**Adj. R squared = 0.7134**

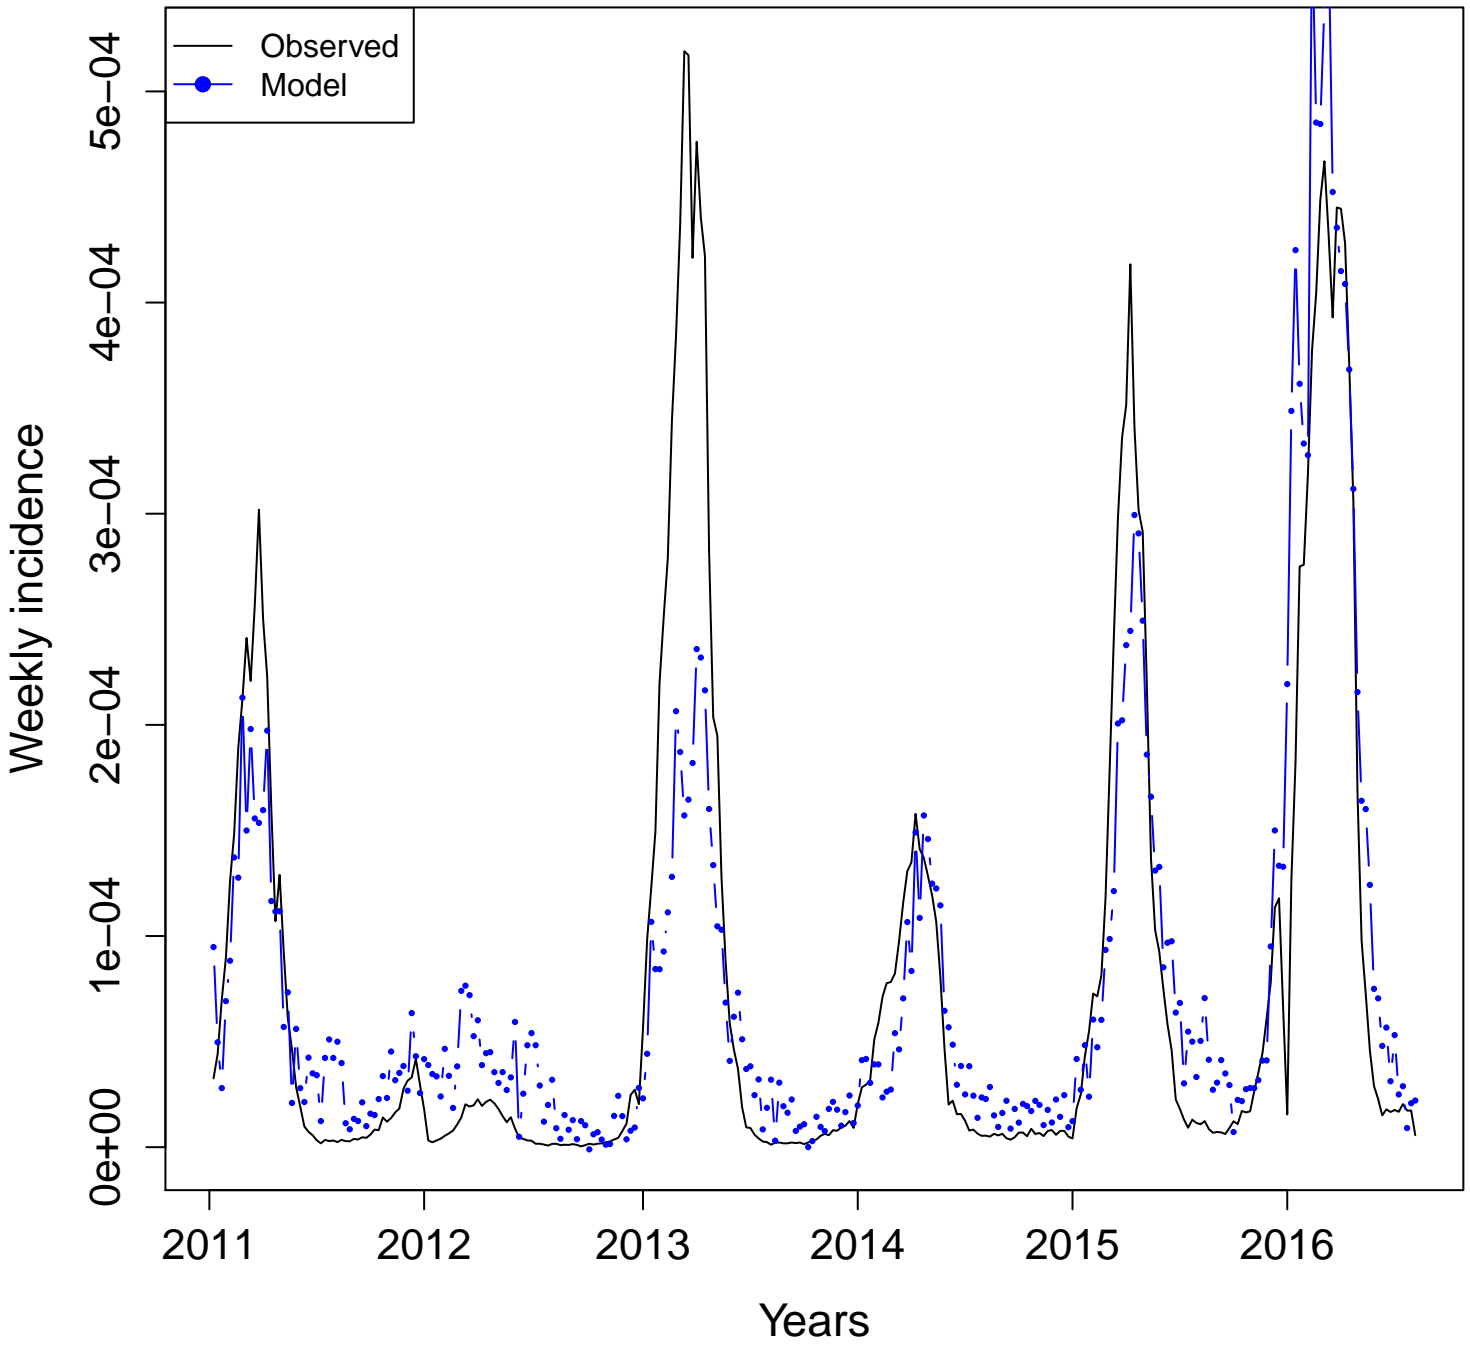

**PR- dengue.virus**  
**Adj. R squared = 0.3589**

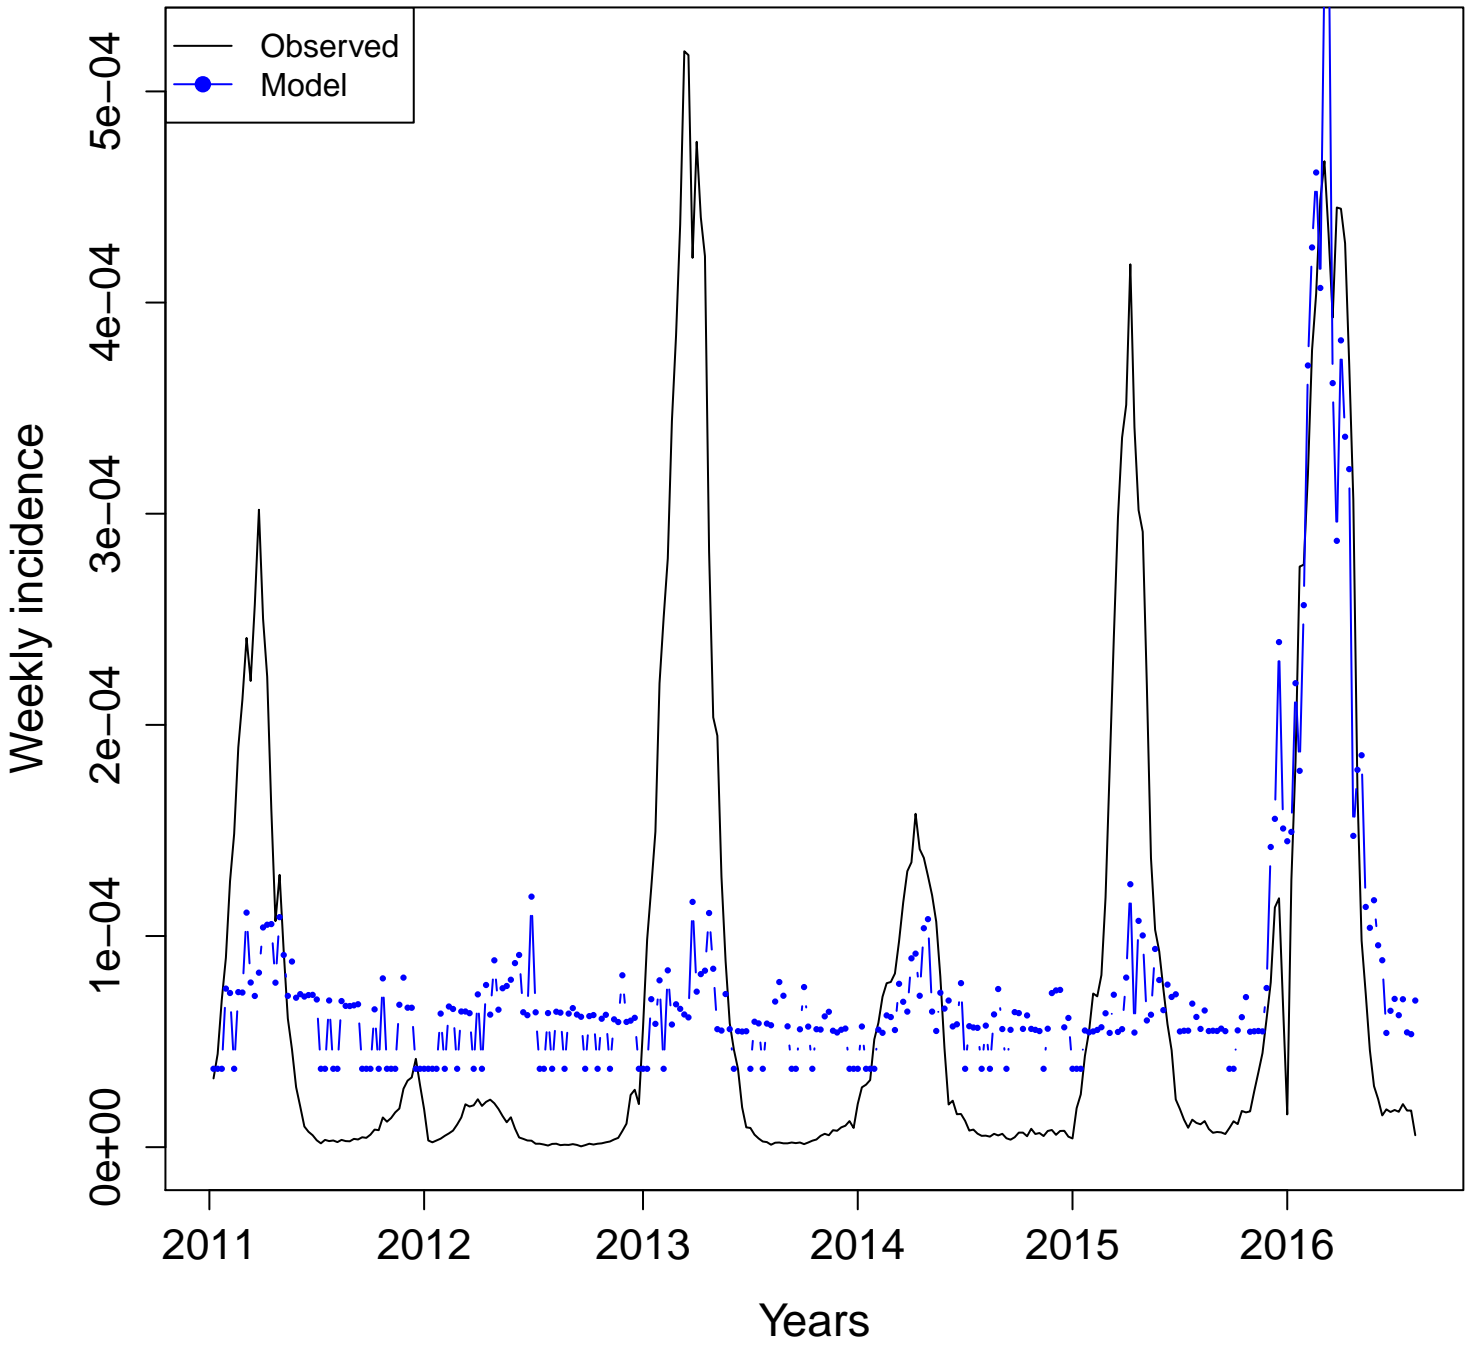

# PR- DHF

Adj. R squared = -0.0017

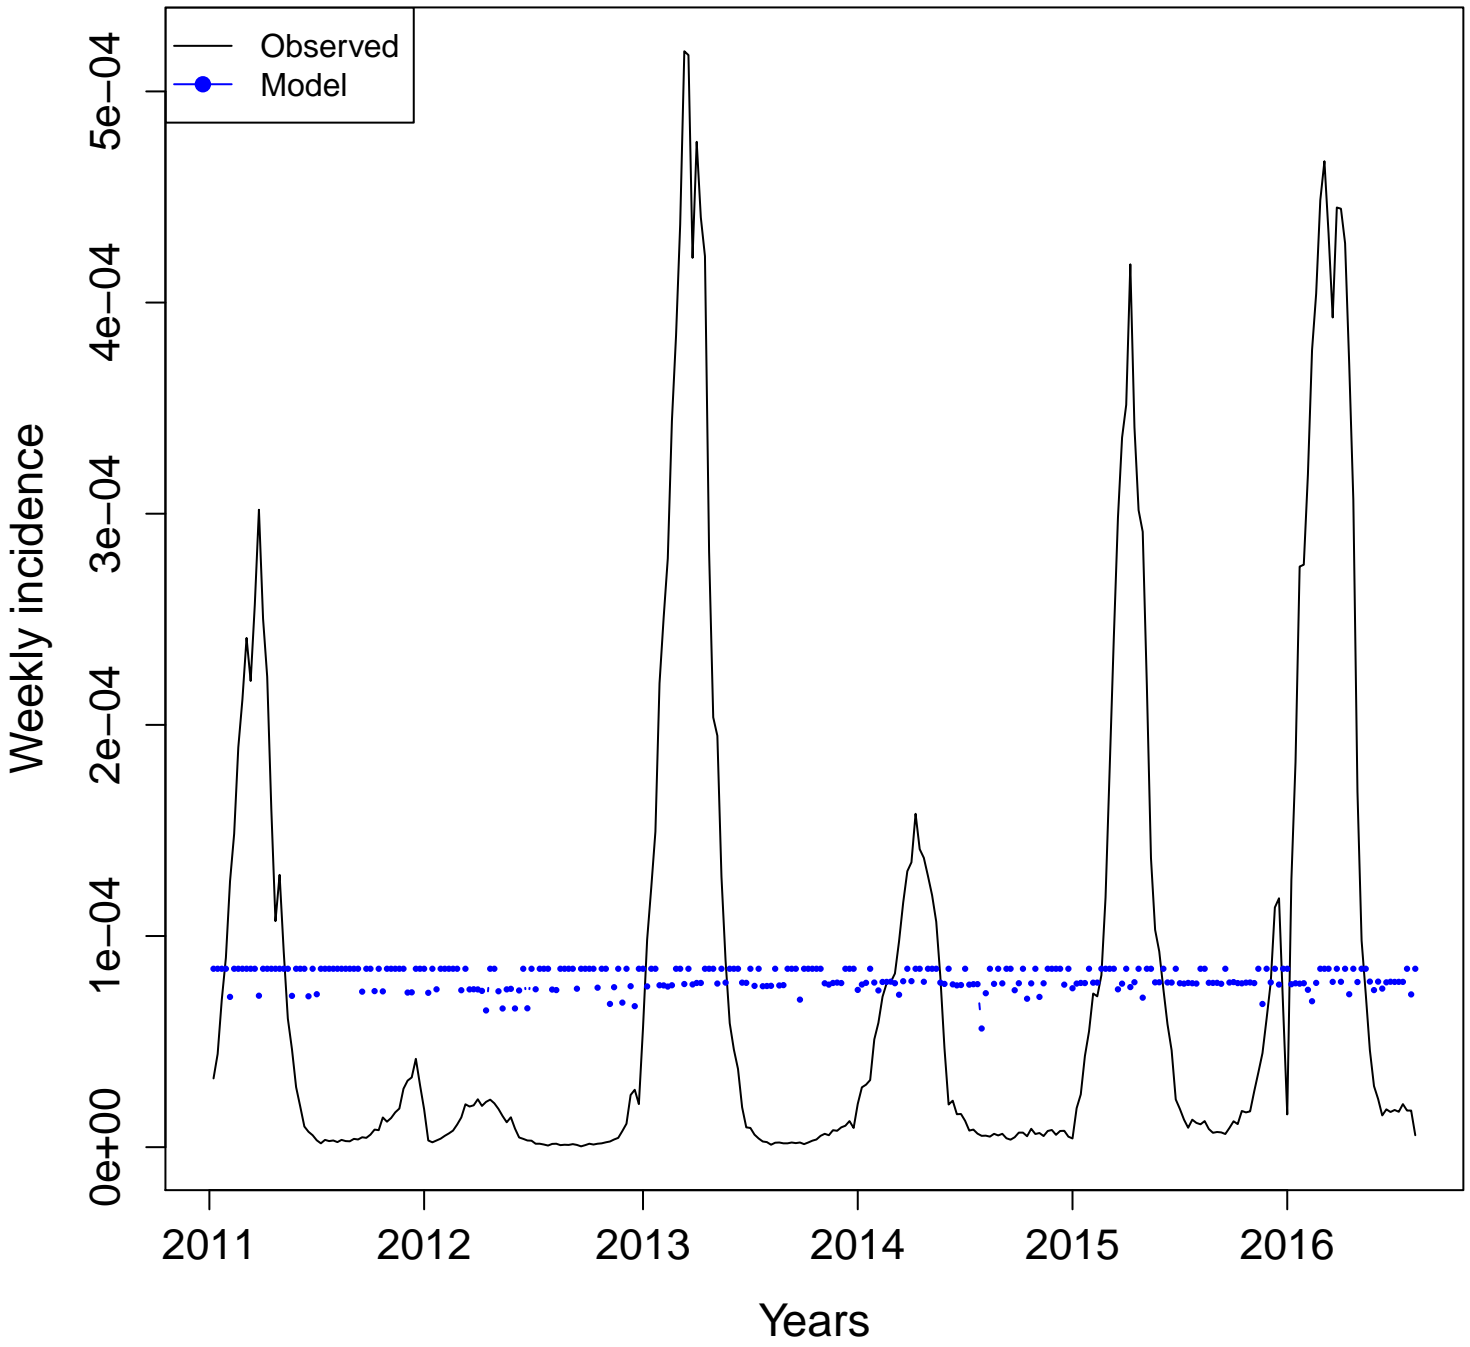

**PR- mosquito.dengue**  
**Adj. R squared = 0.5349**

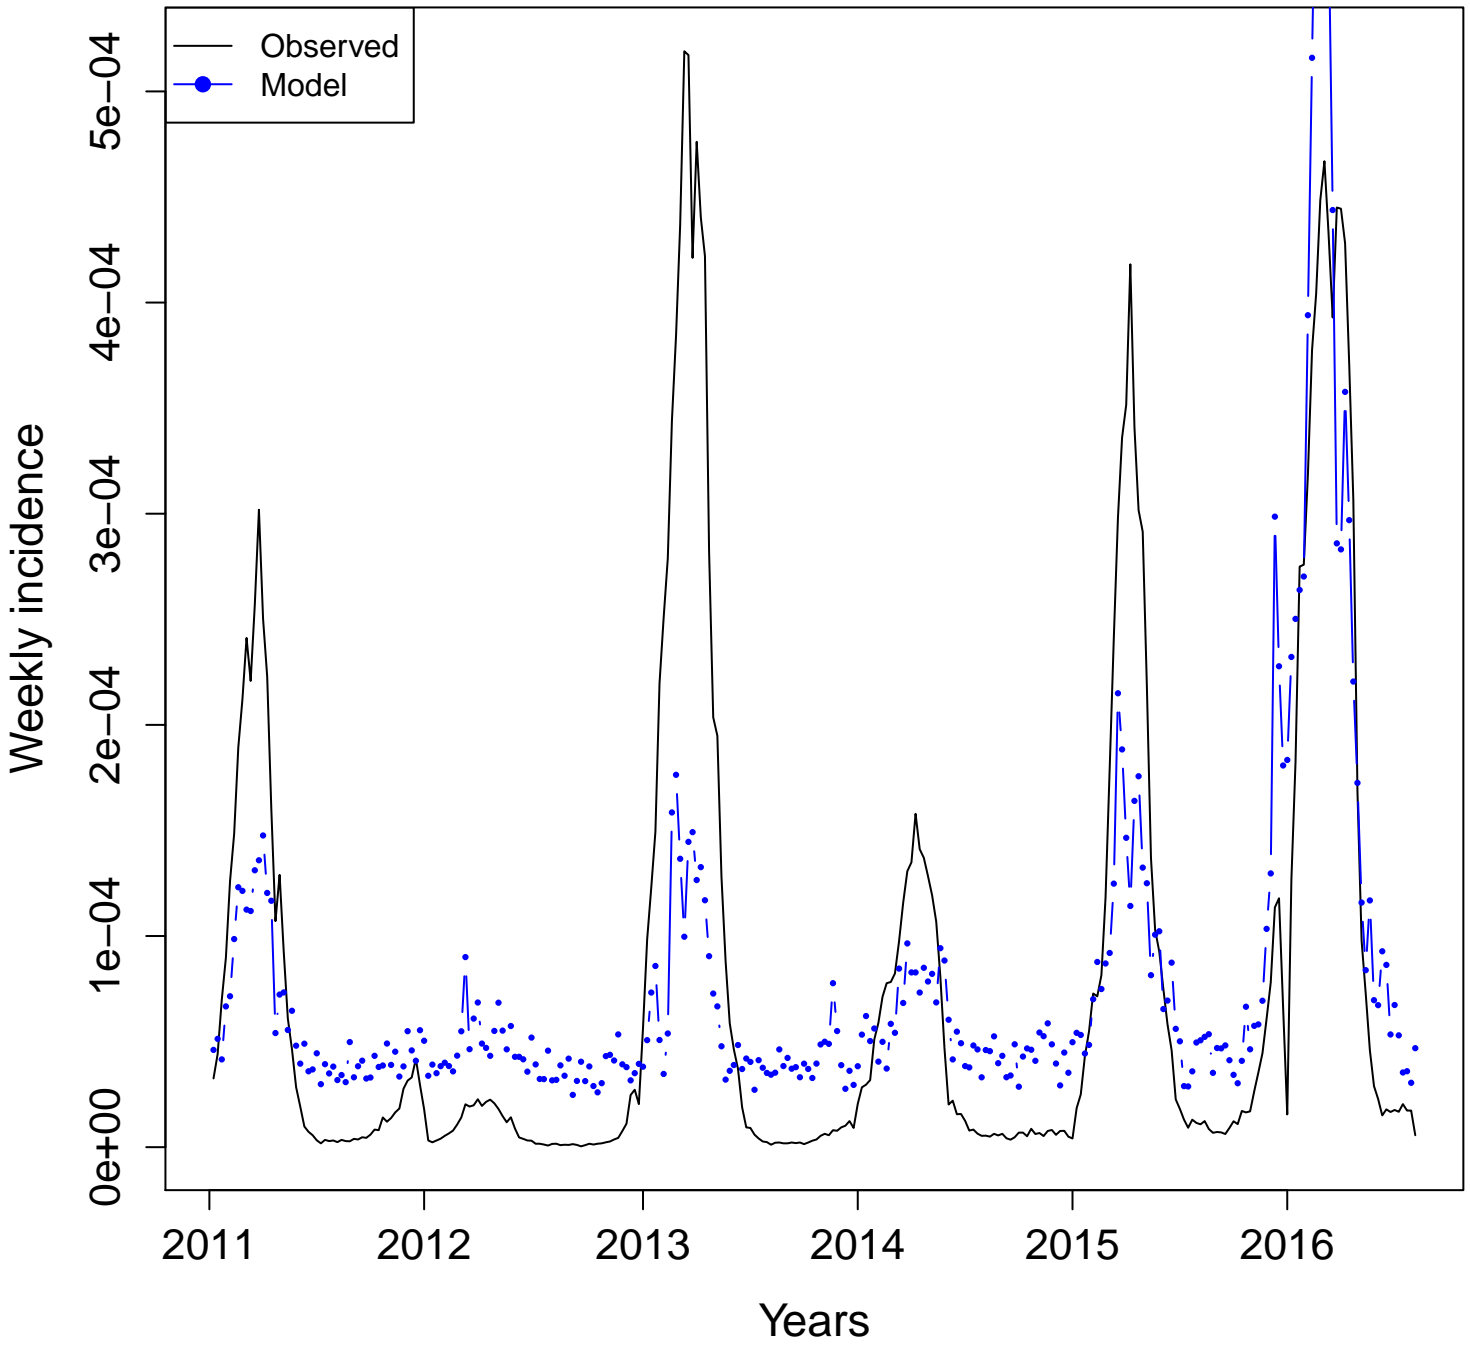

# PR- mosquito

Adj. R squared = 0.4472

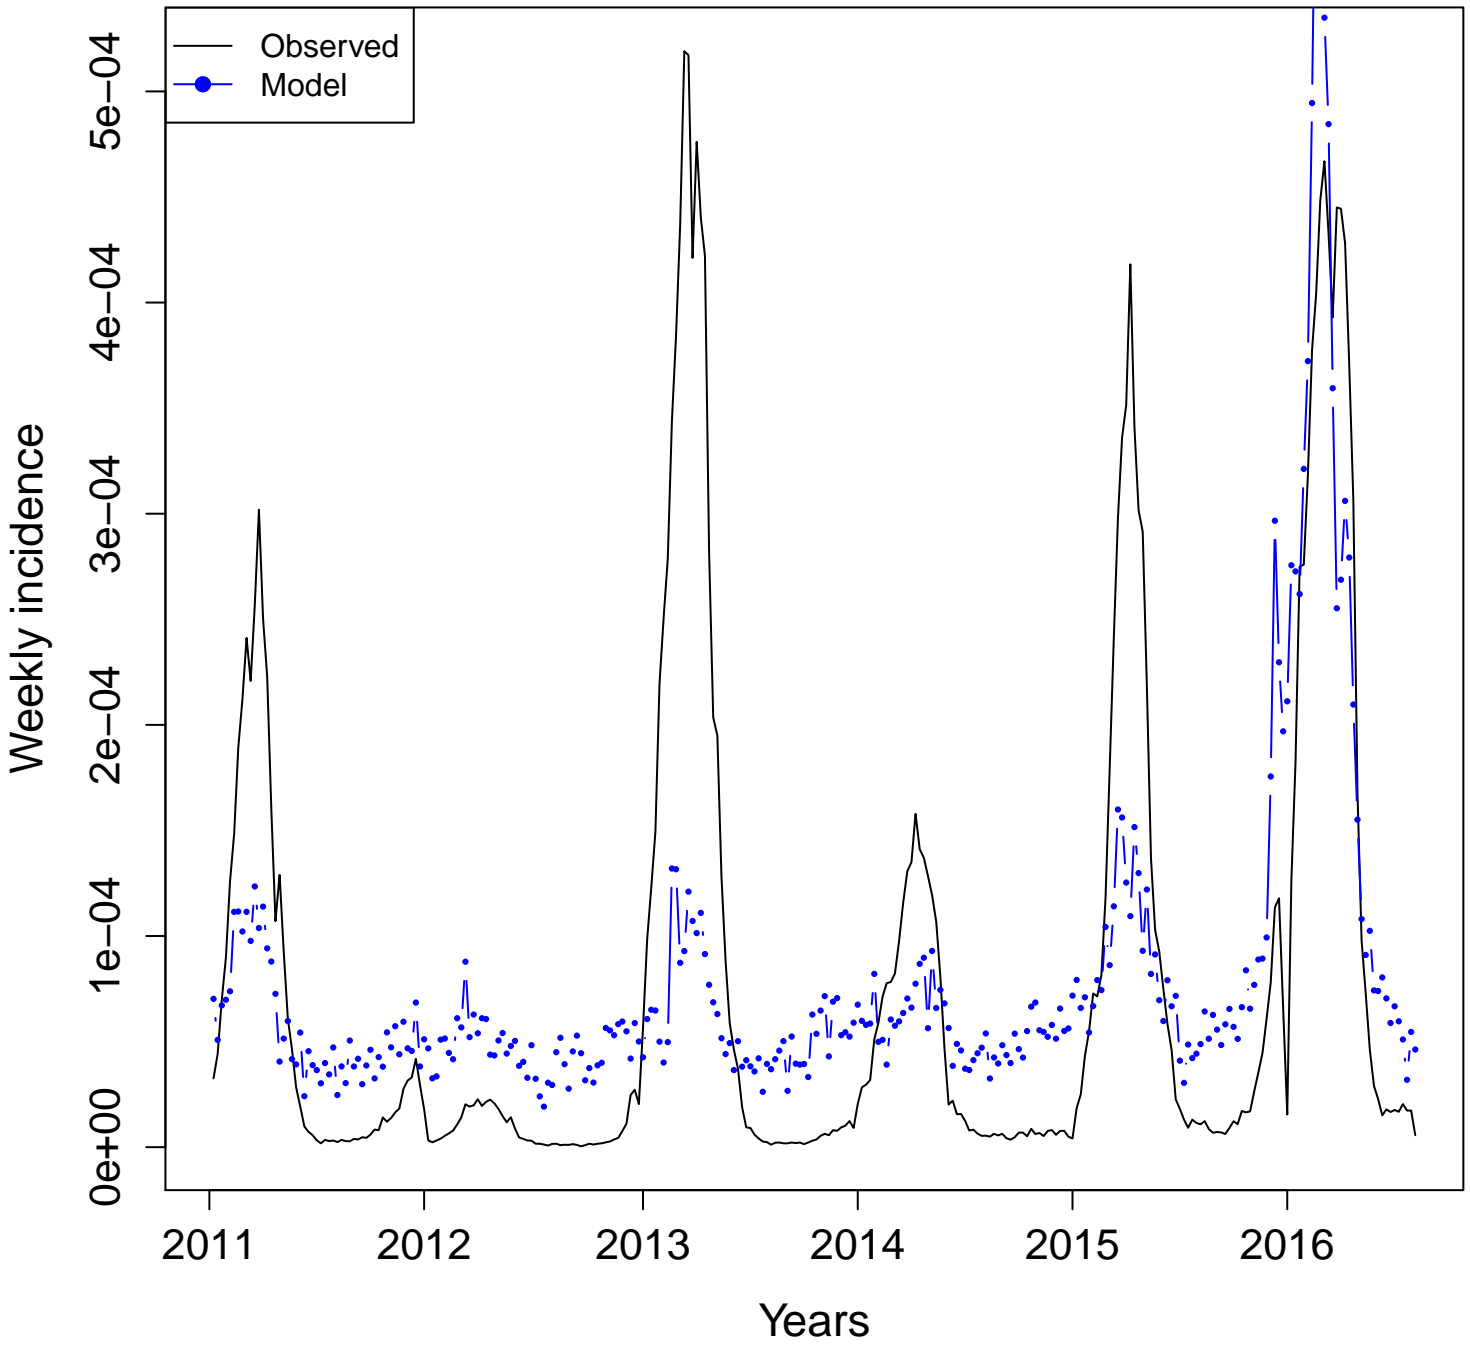



# PR- mosquitoes

Adj. R squared = 0.0025

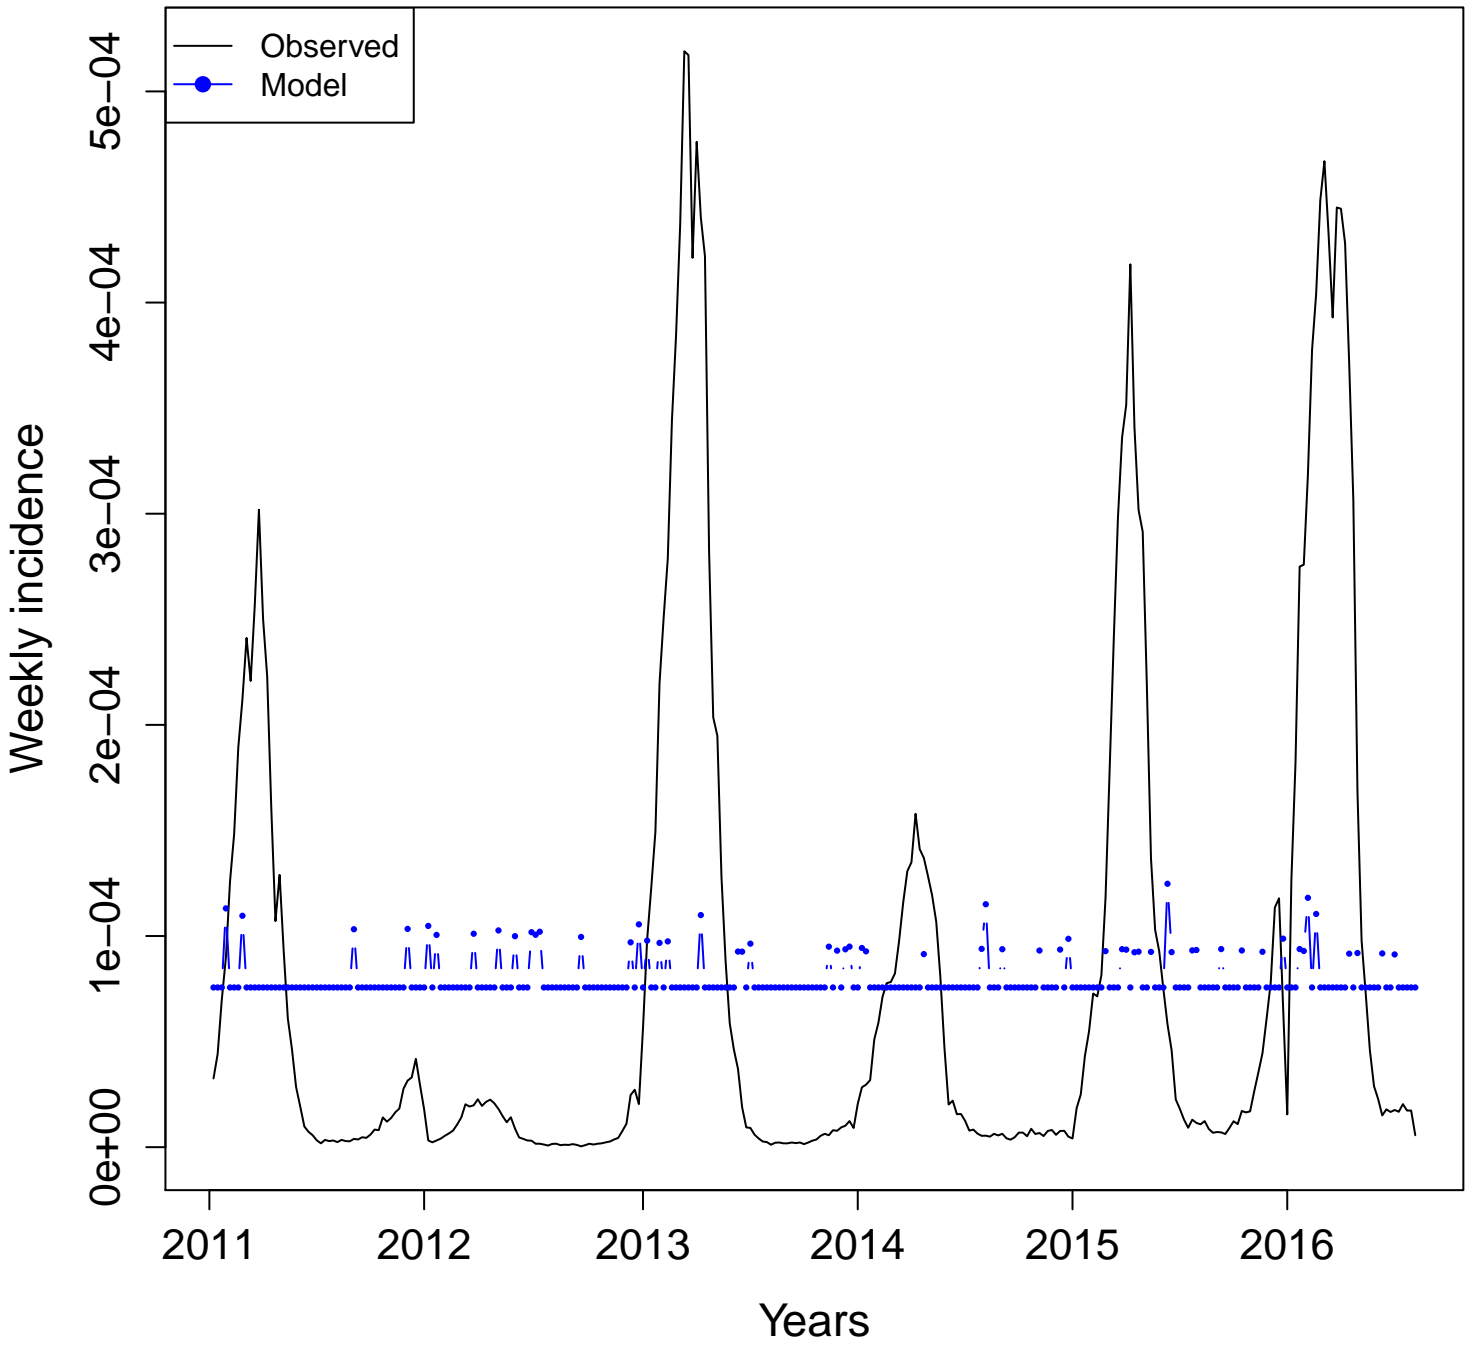

**PR- sintomas.da.dengue**  
**Adj. R squared = 0.7187**

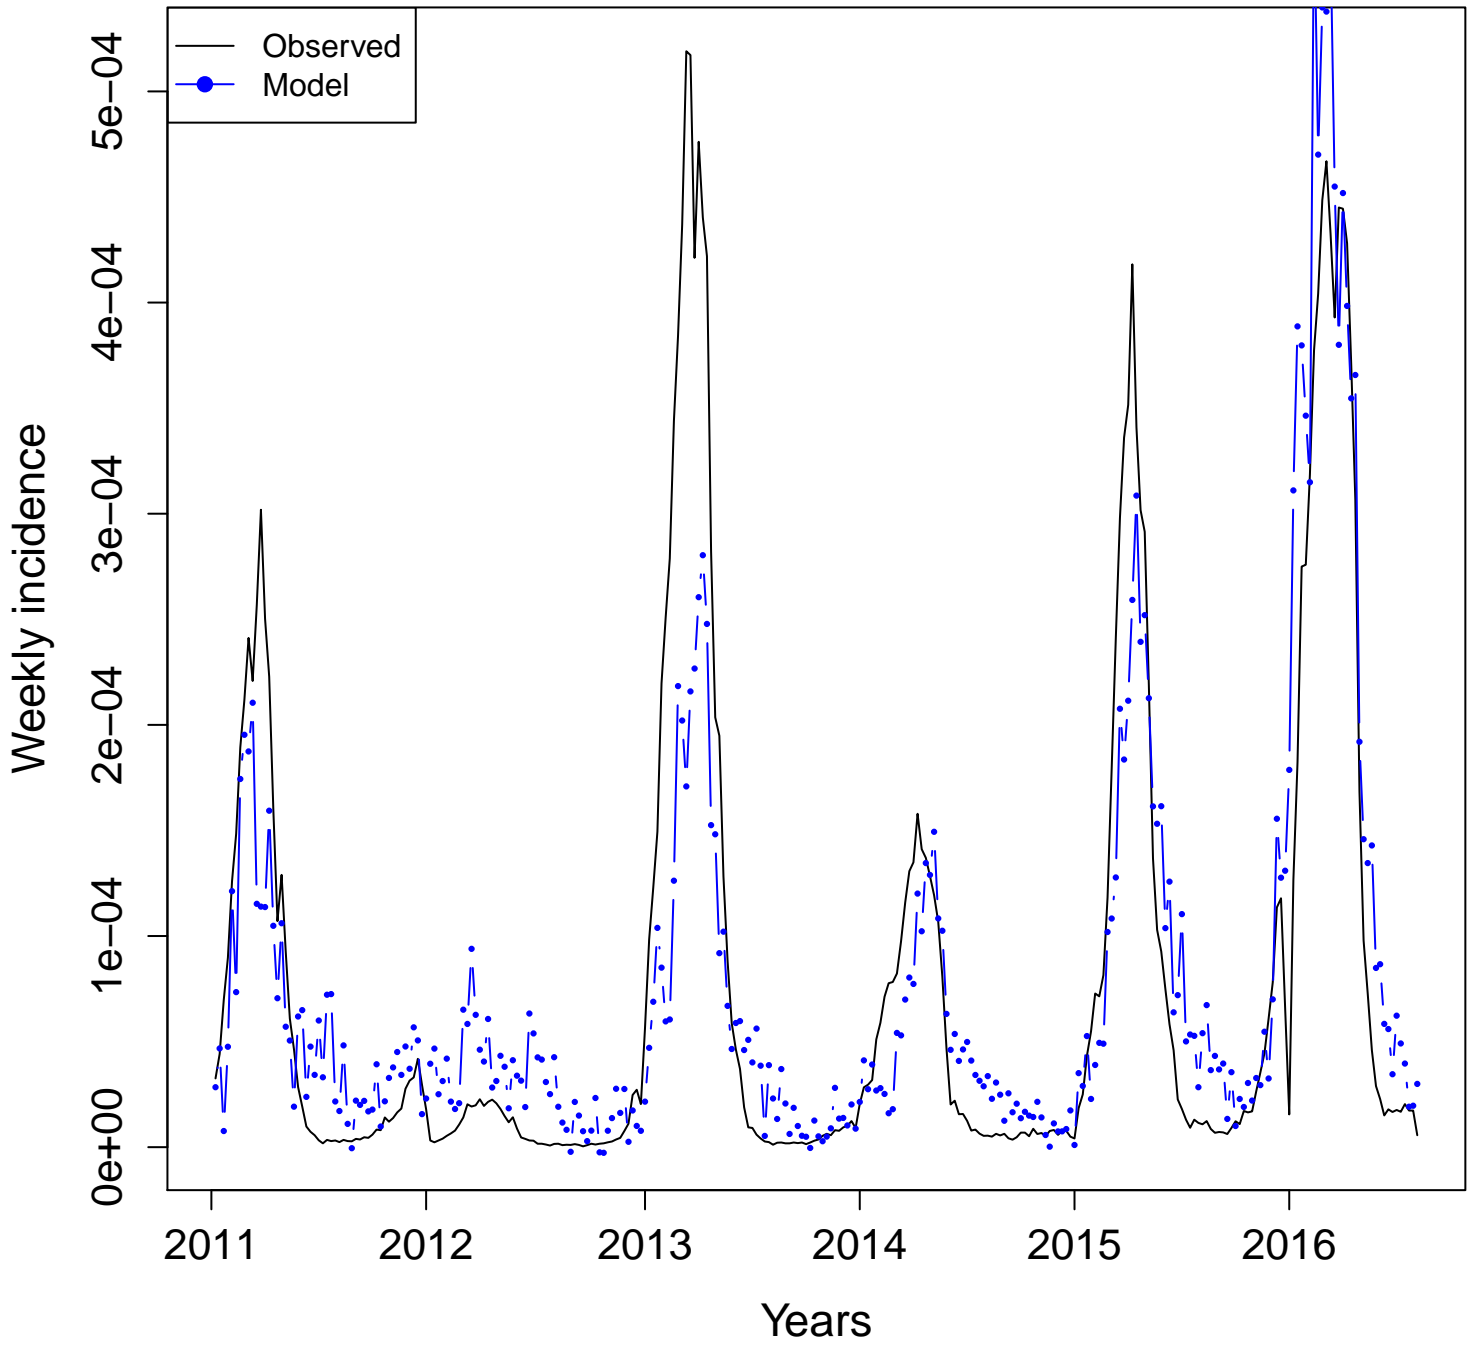

## Rio de Janeiro (RJ)

# Dengue incidence vs. Google Health Trends (2011–2016)

### Definitions:

- **Combined terms:**
  - **All:** model with all the available terms.  $n =$  number of terms
  - **Four:** model with "dengue", "dengue sintomas", "aedes", and "mosquito".
  - **Uncorrelated:** model with non-correlated terms.  $n =$  number of uncorrelated terms
- **Individual terms:** Plots developed with one term at a time.
- Terms for all and uncorrelated models can be found in additional file 3.

**Combined terms**  
**Adjusted R squared**

**Rio de Janeiro (RJ)**

**All**  
**(n = 12)**

**BR-RJ**  
**Adj. R squared = 0.7647**

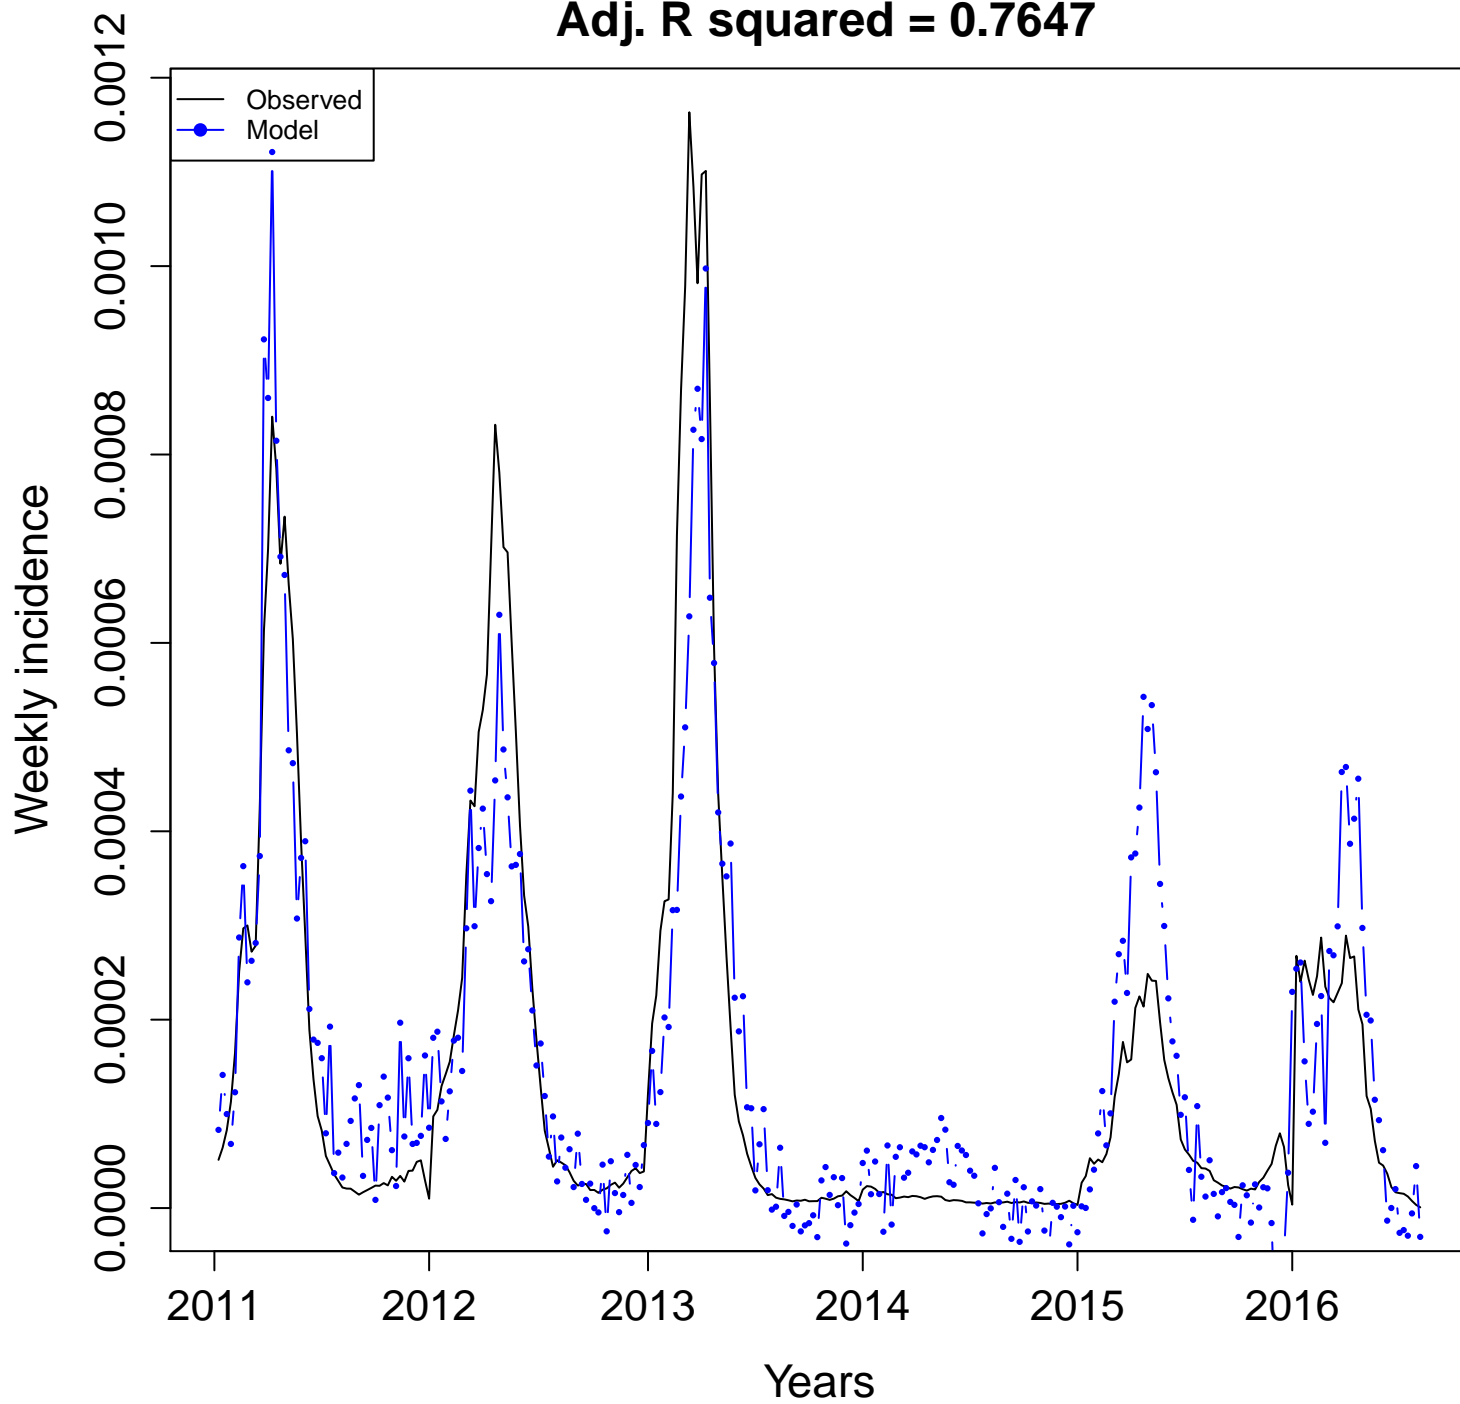

**BR-RJ**  
**Adj. R squared = 0.7436**

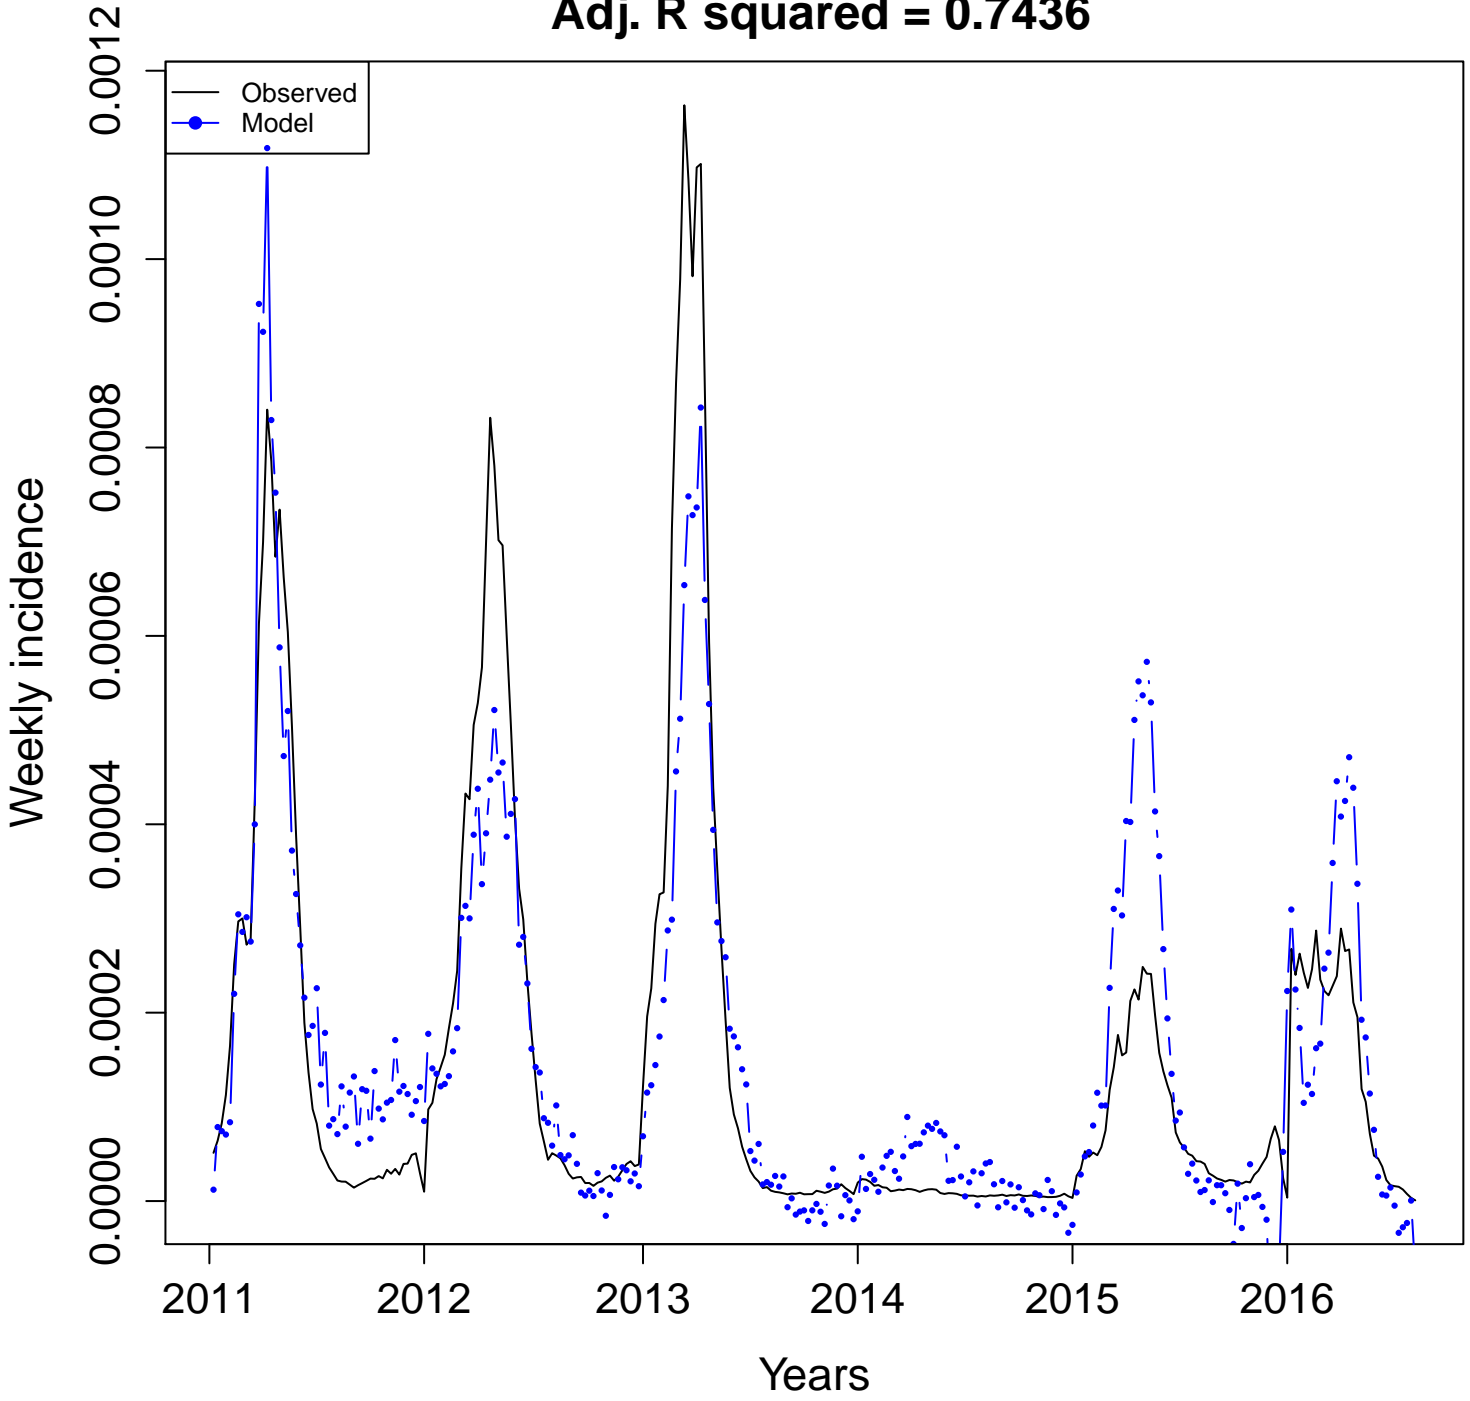

**Uncorrelated  
(n = 5)**

**BR-RJ  
Adj. R squared = 0.7042**

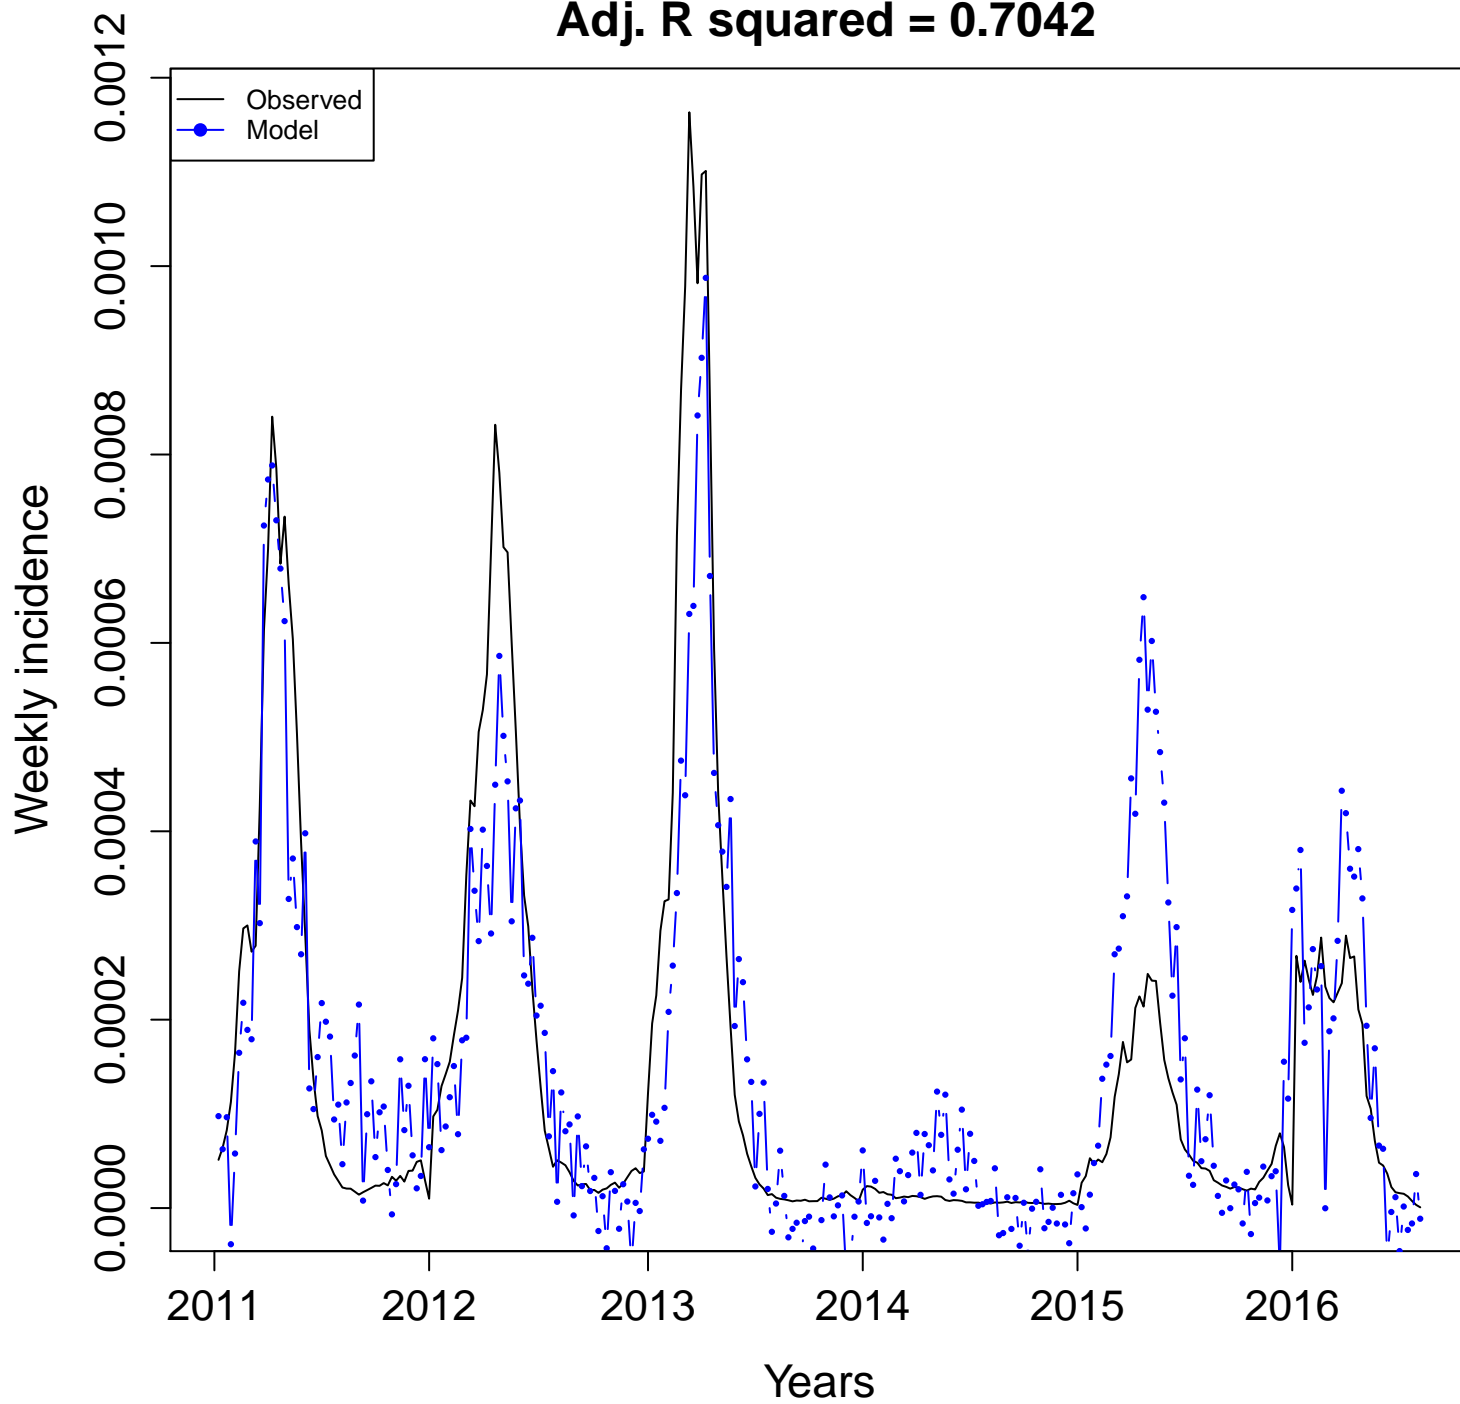

**Individual terms**  
**Adjusted R squared**

**Rio de Janeiro (RJ)**



**RJ- aedes.aegypti**  
**Adj. R squared = 0.0067**

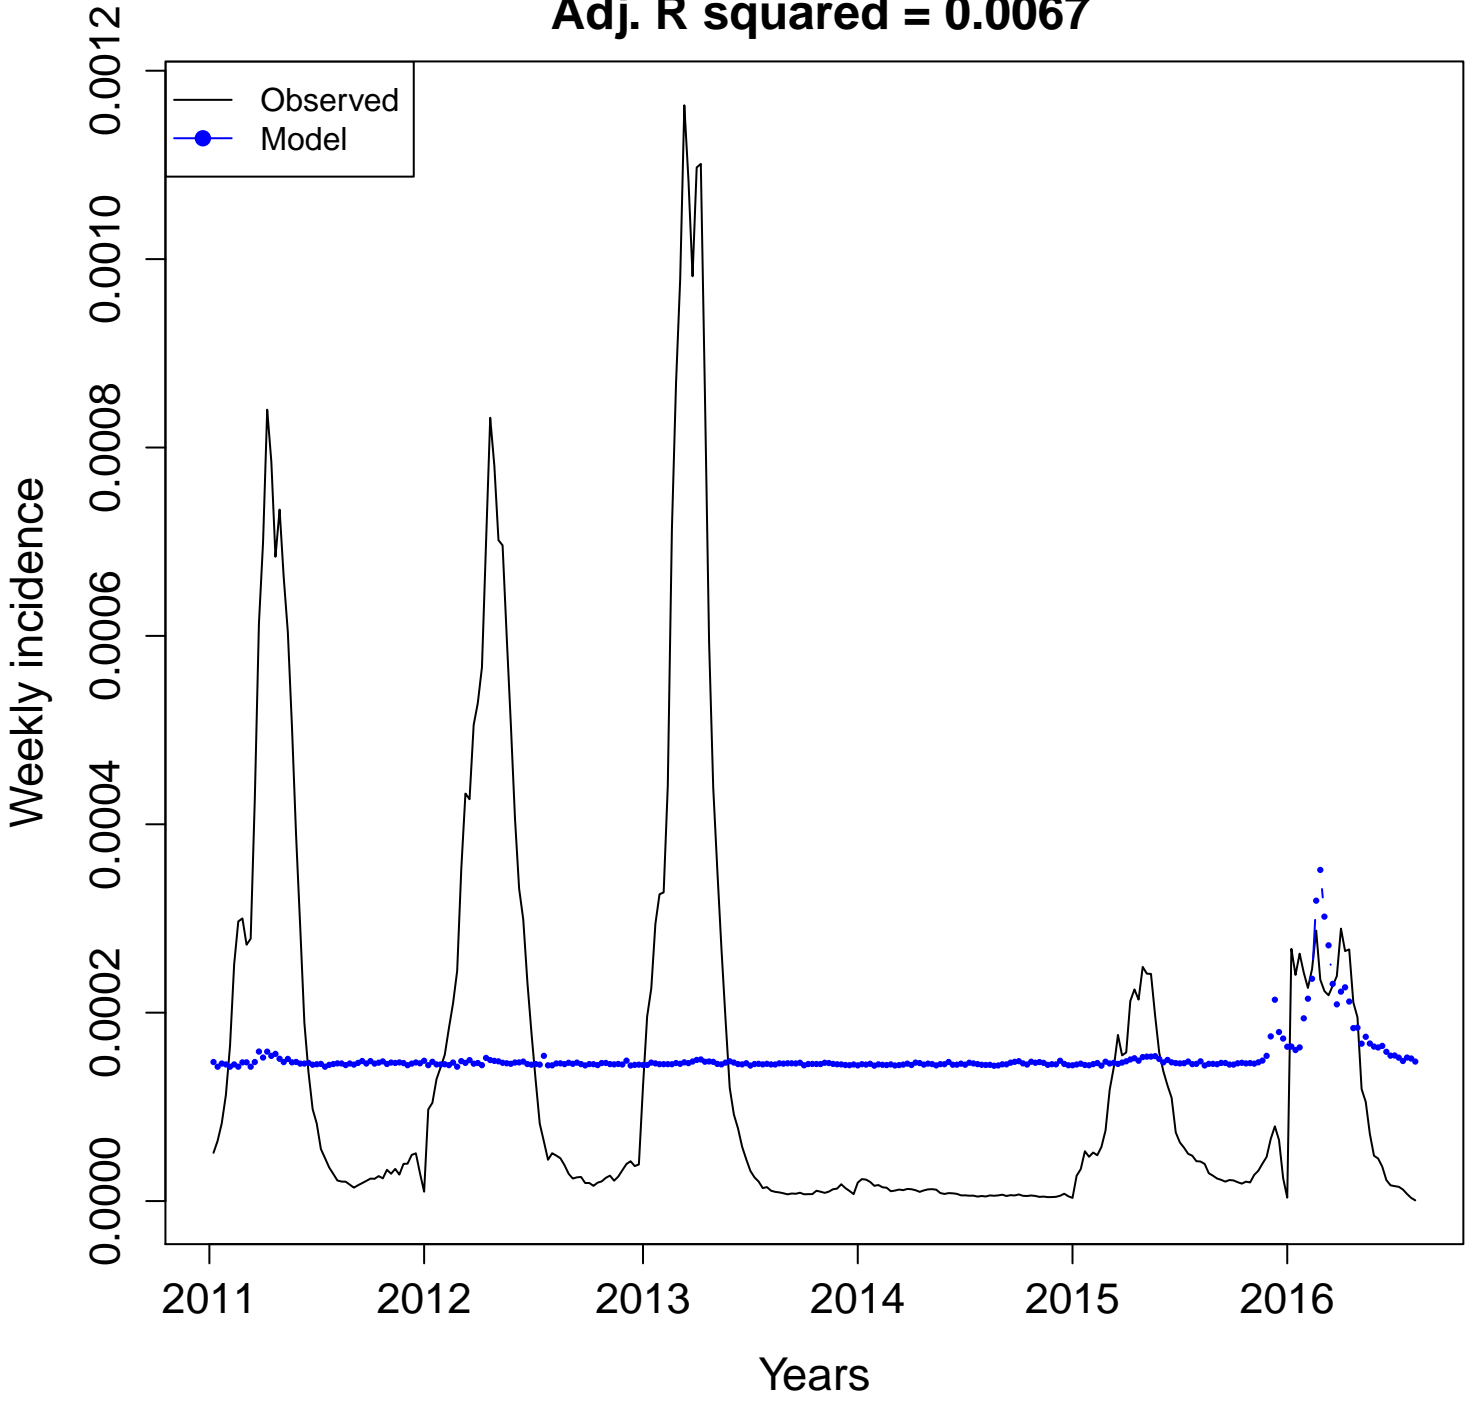

**RJ- aedes**  
**Adj. R squared = 0.008**

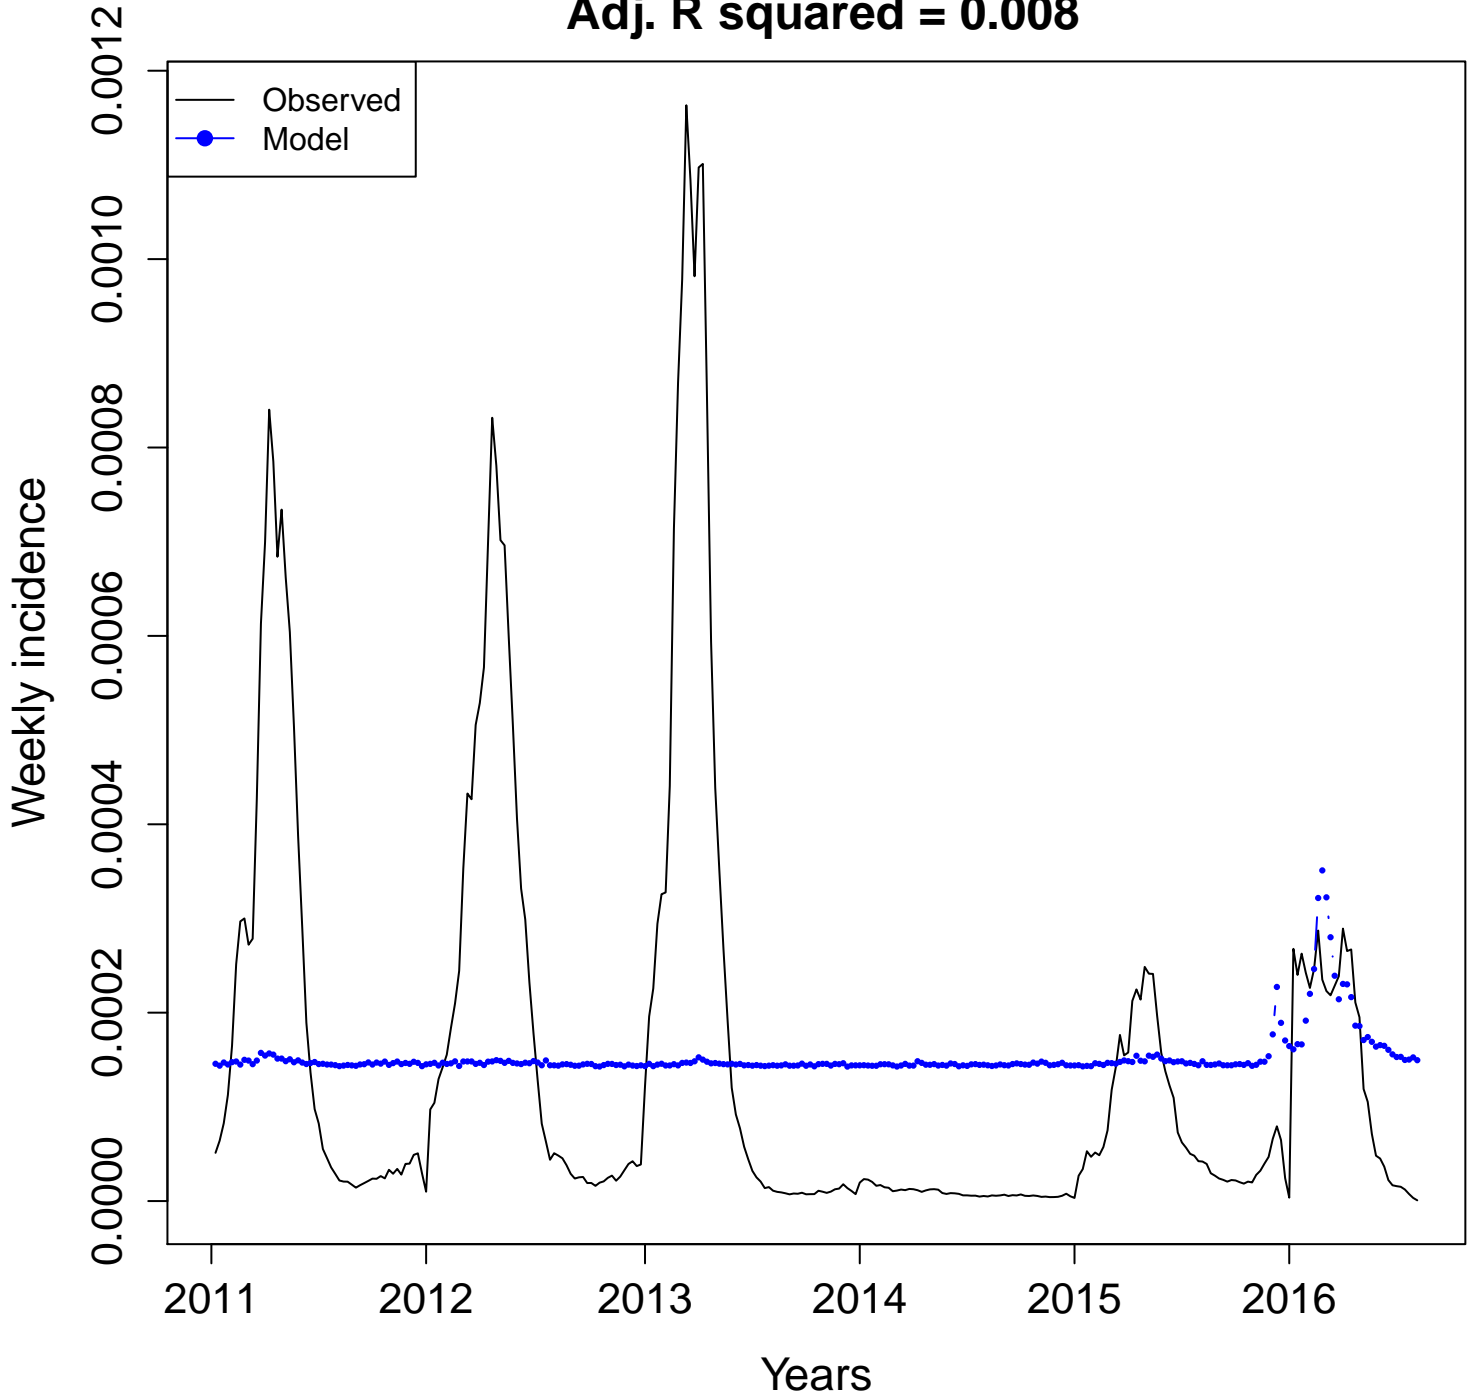

**RJ- aegypti**  
**Adj. R squared = 0.0068**

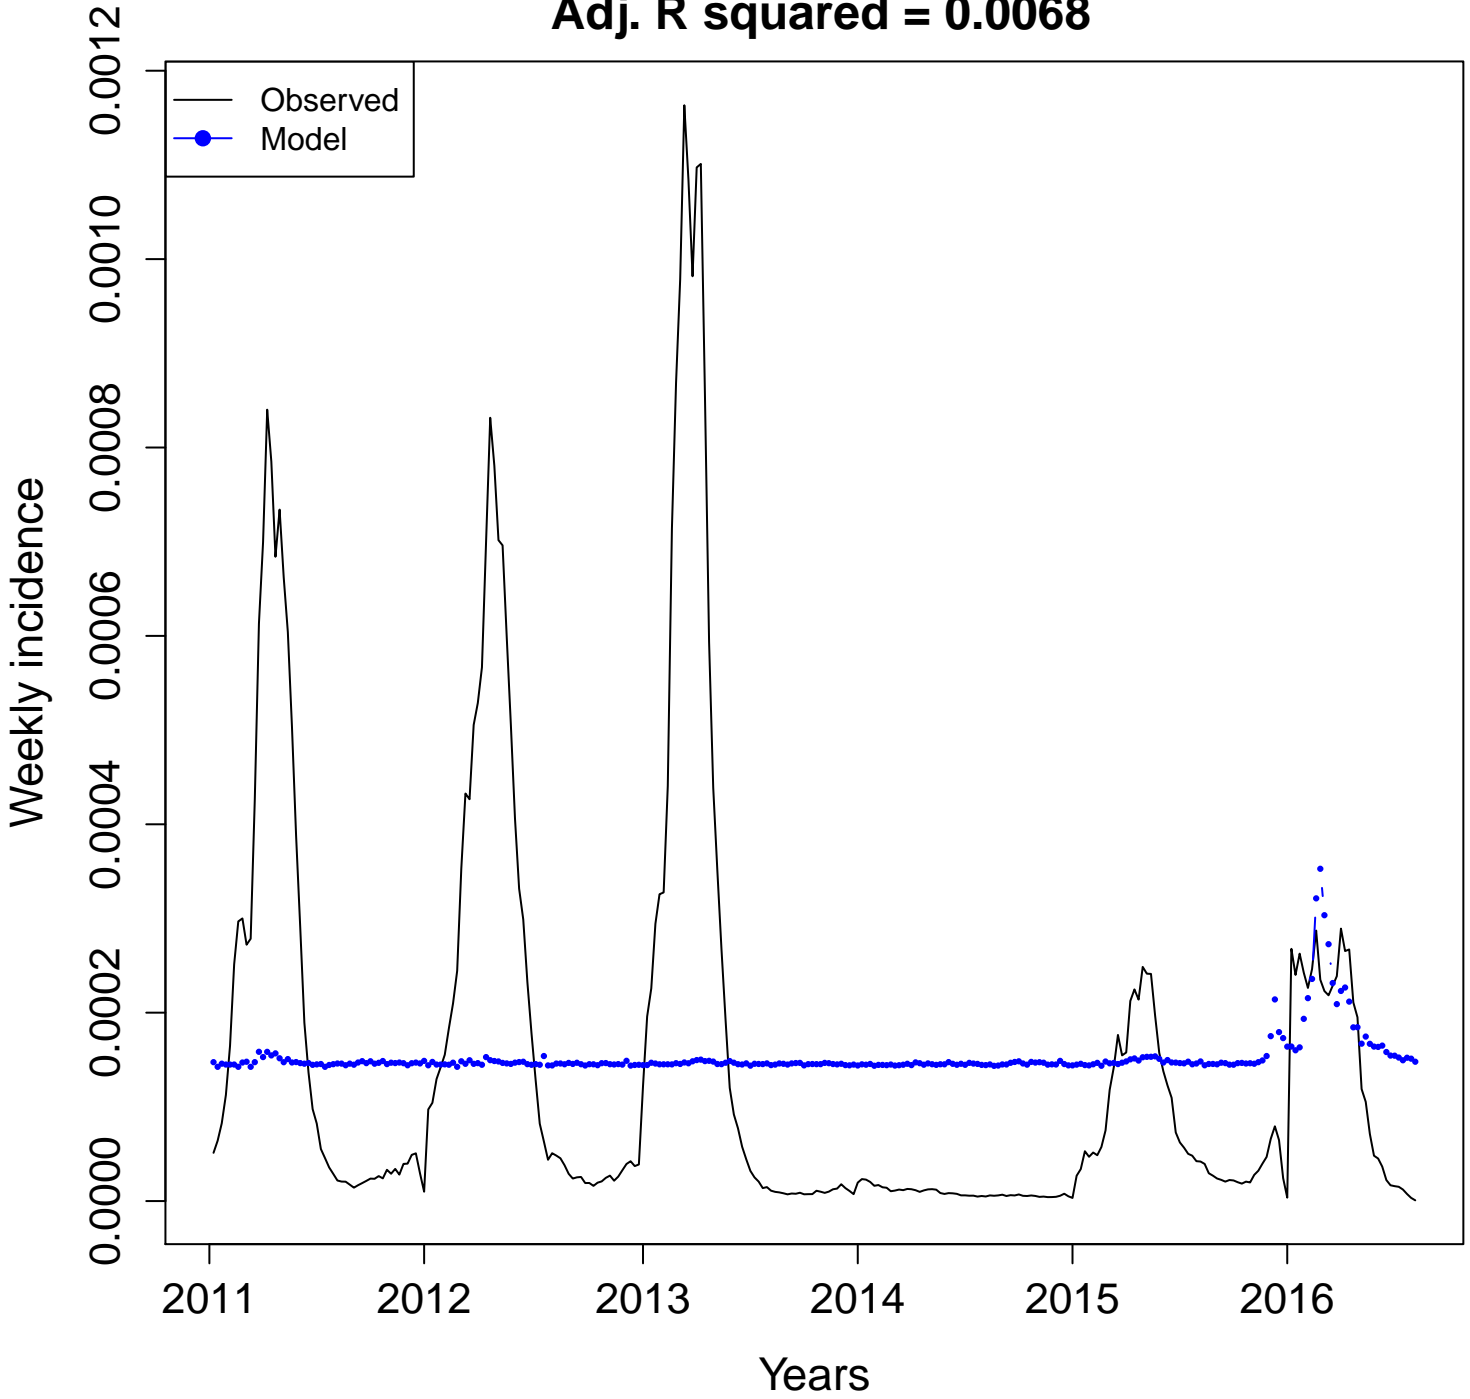

**RJ- dengue.fever**  
**Adj. R squared = 0.2767**

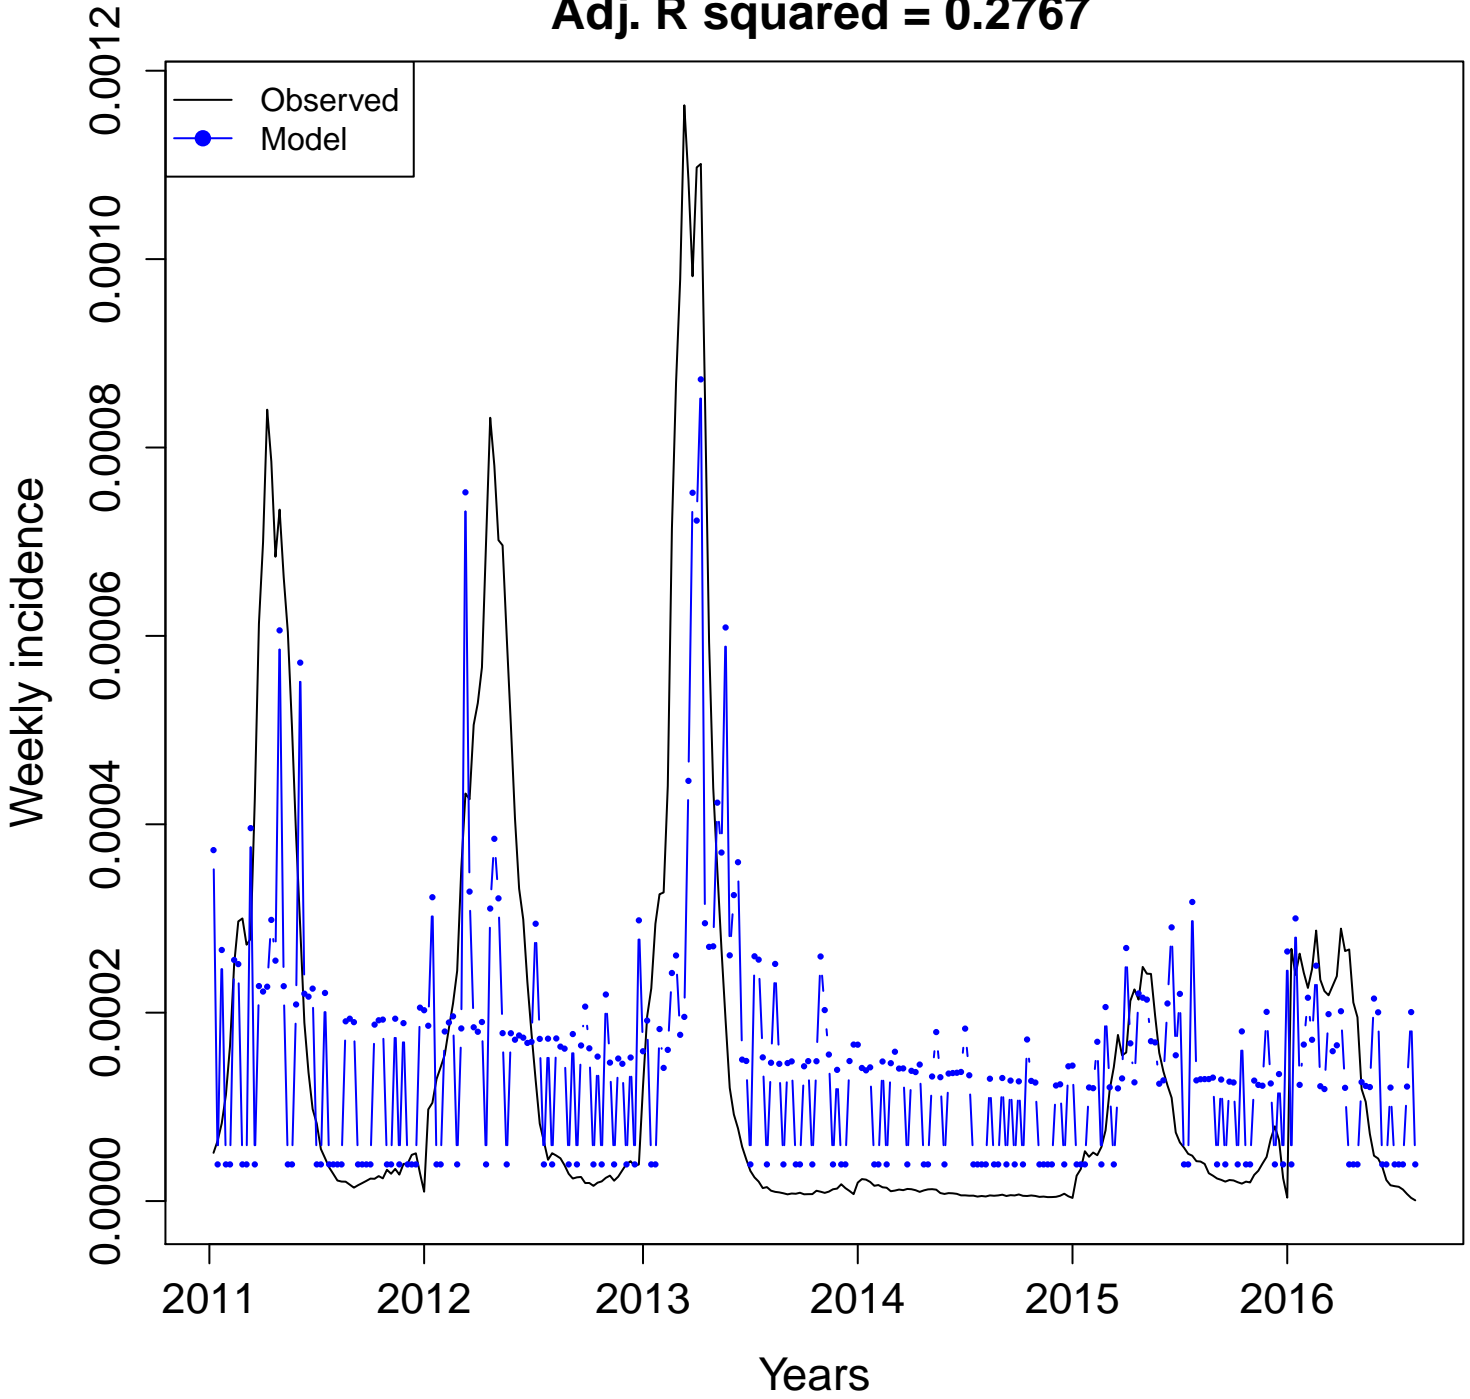

# RJ- dengue

Adj. R squared = 0.4435

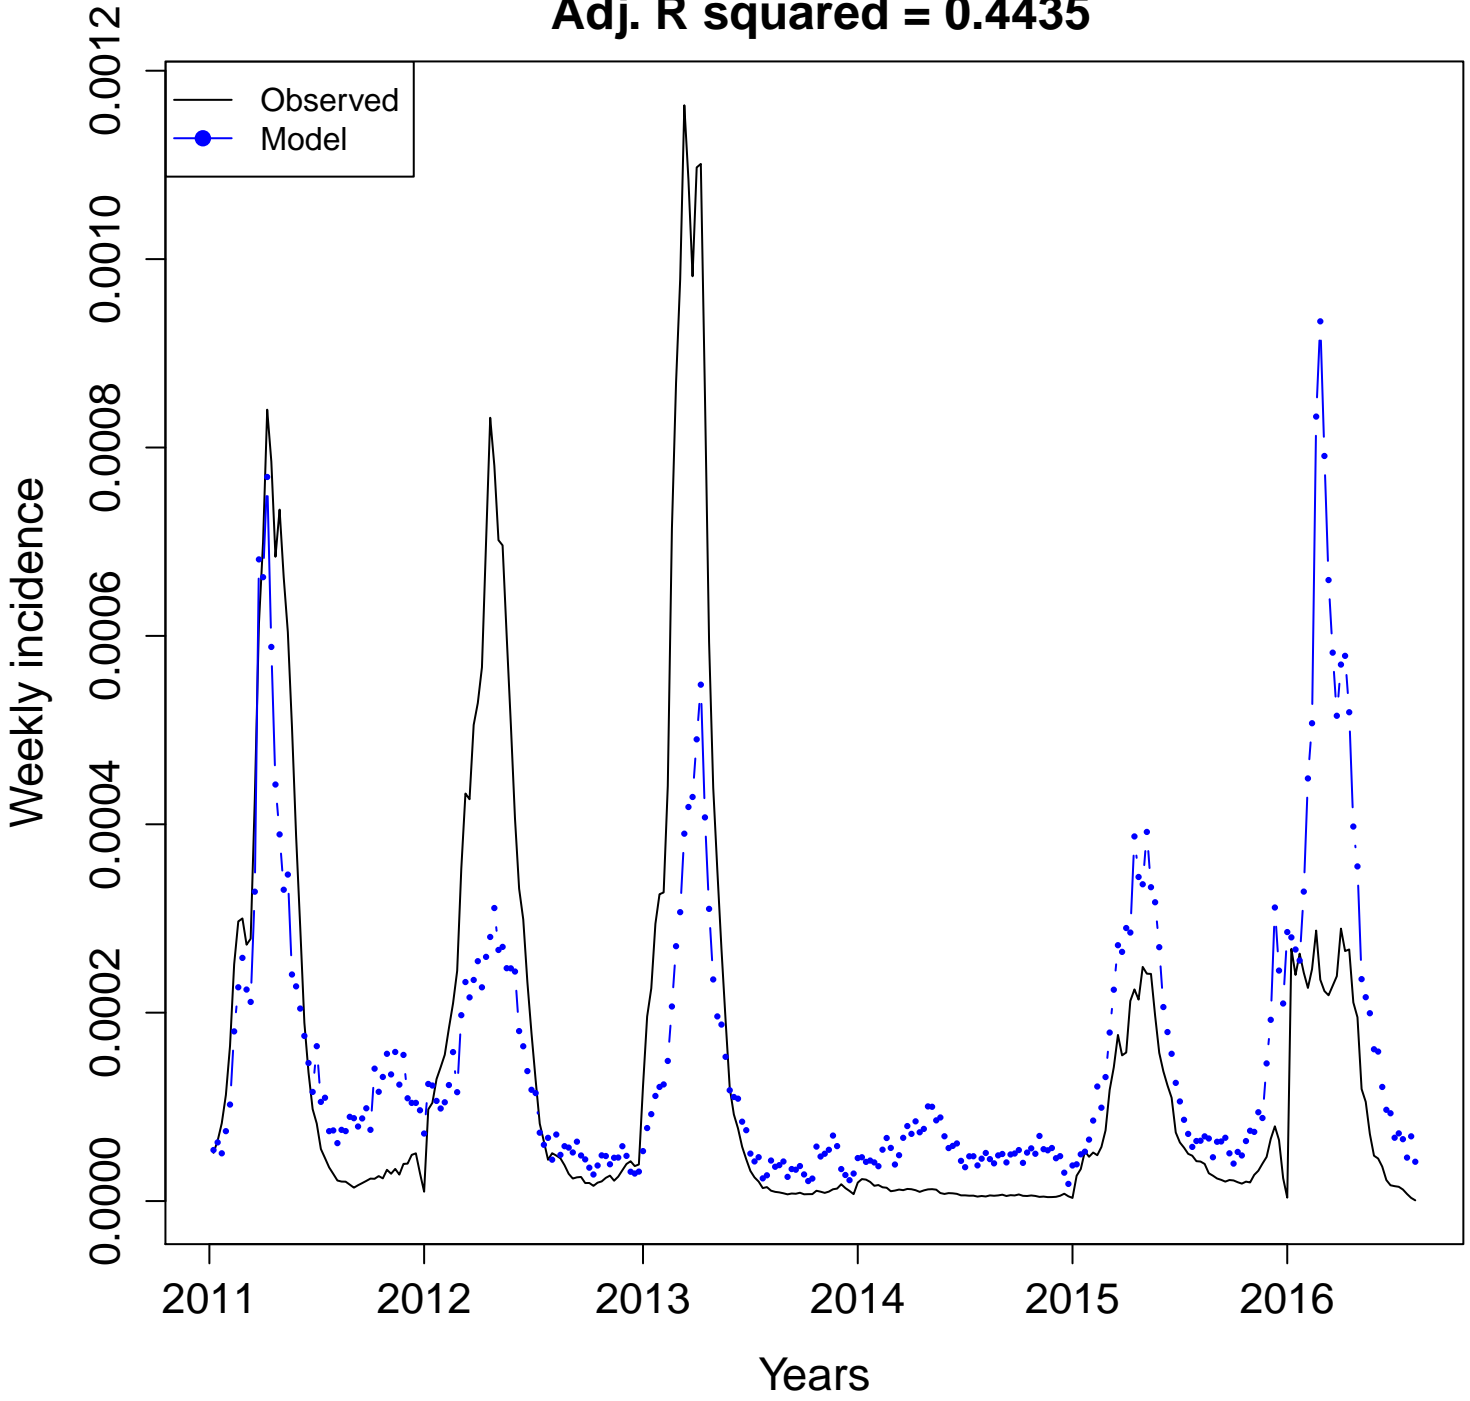

# RJ- dengue.sintomas

Adj. R squared = 0.5499

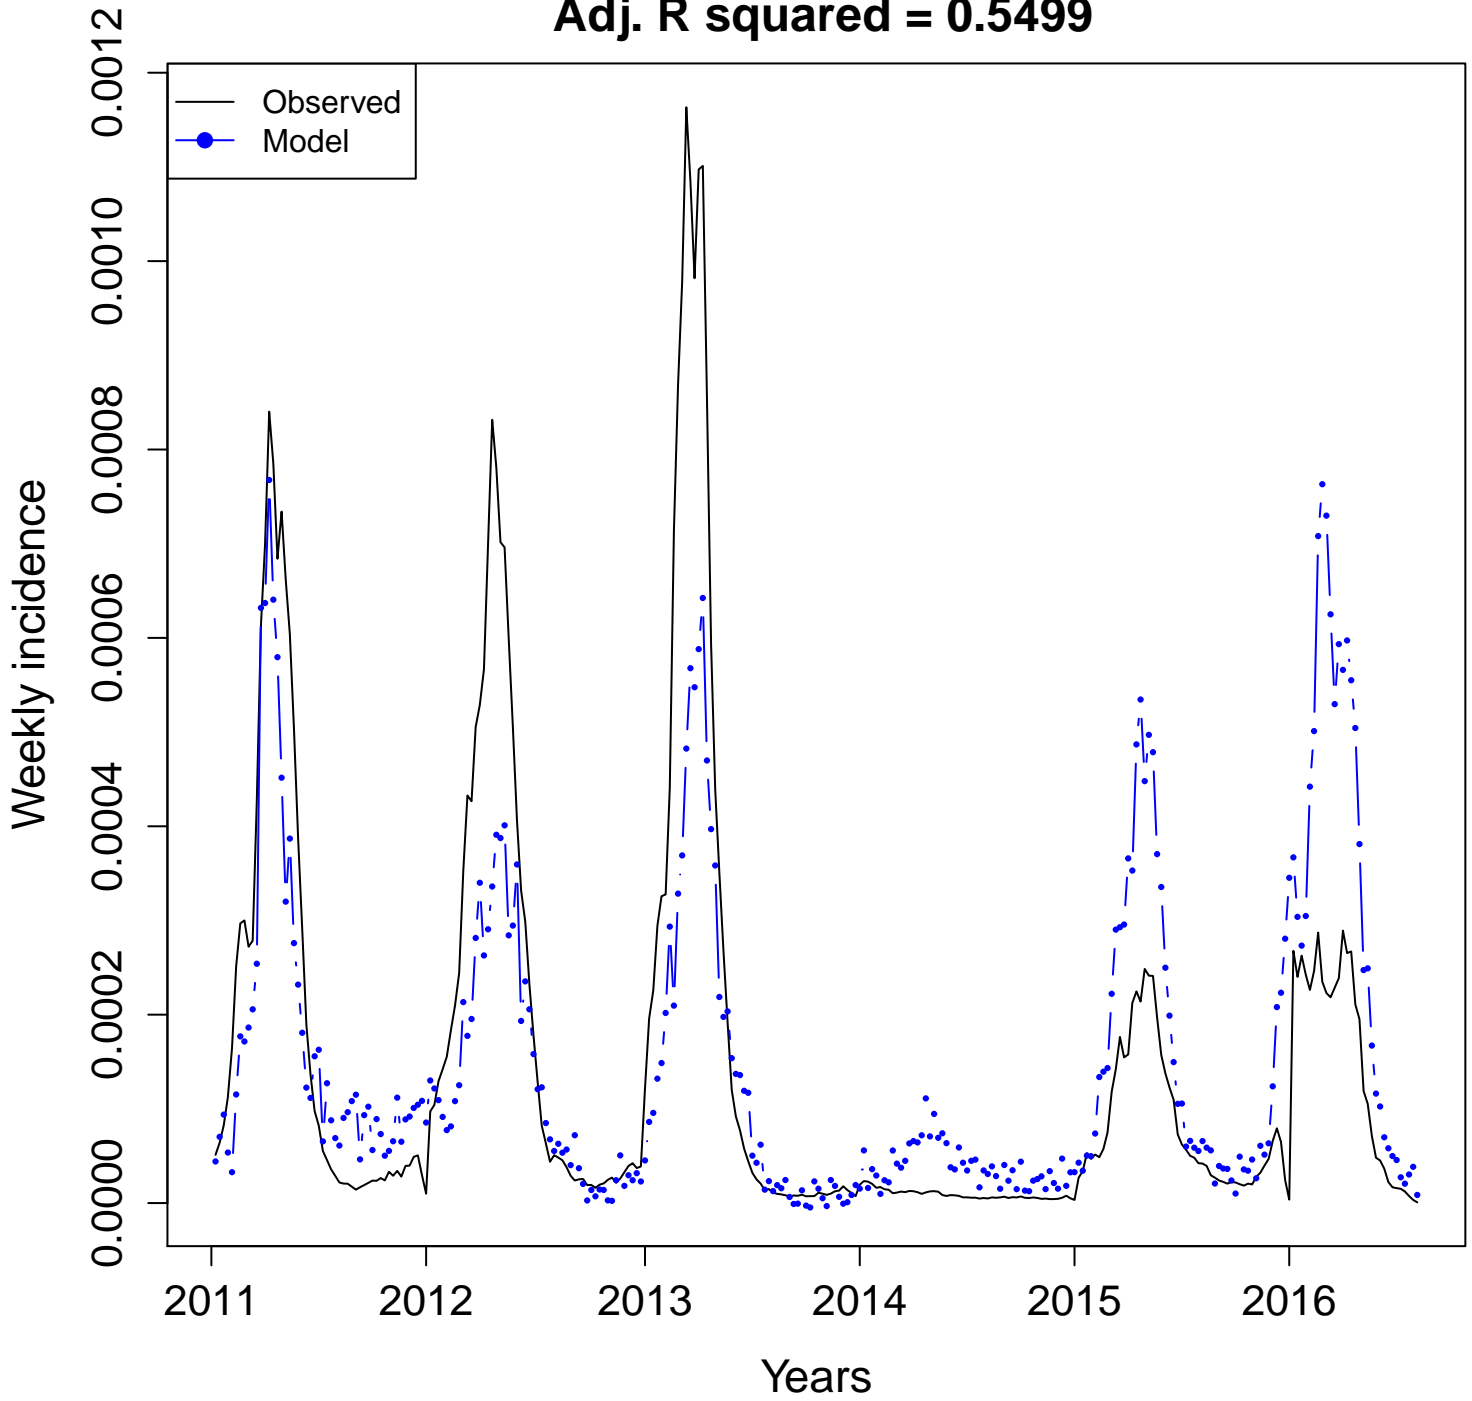

# RJ- dengue.virus

Adj. R squared = 0.0369

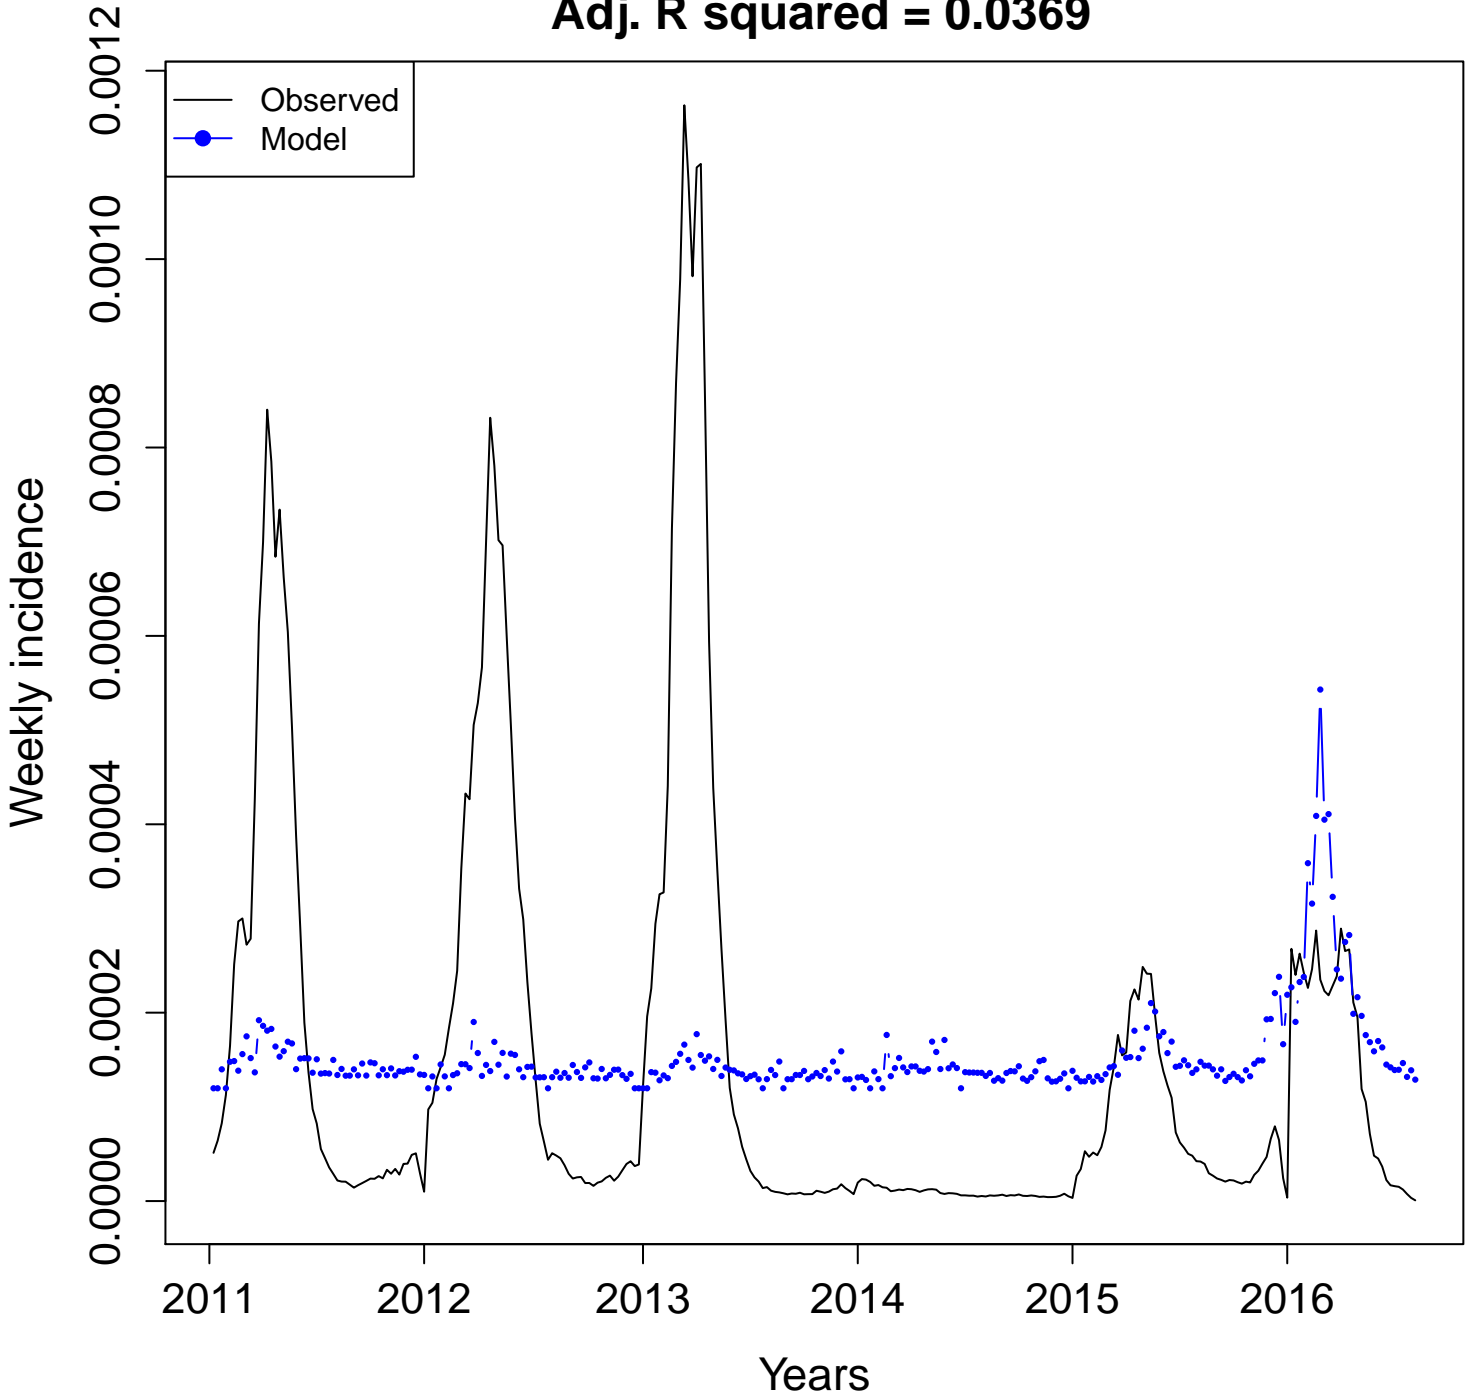

# RJ- DHF

Adj. R squared = 0.0049

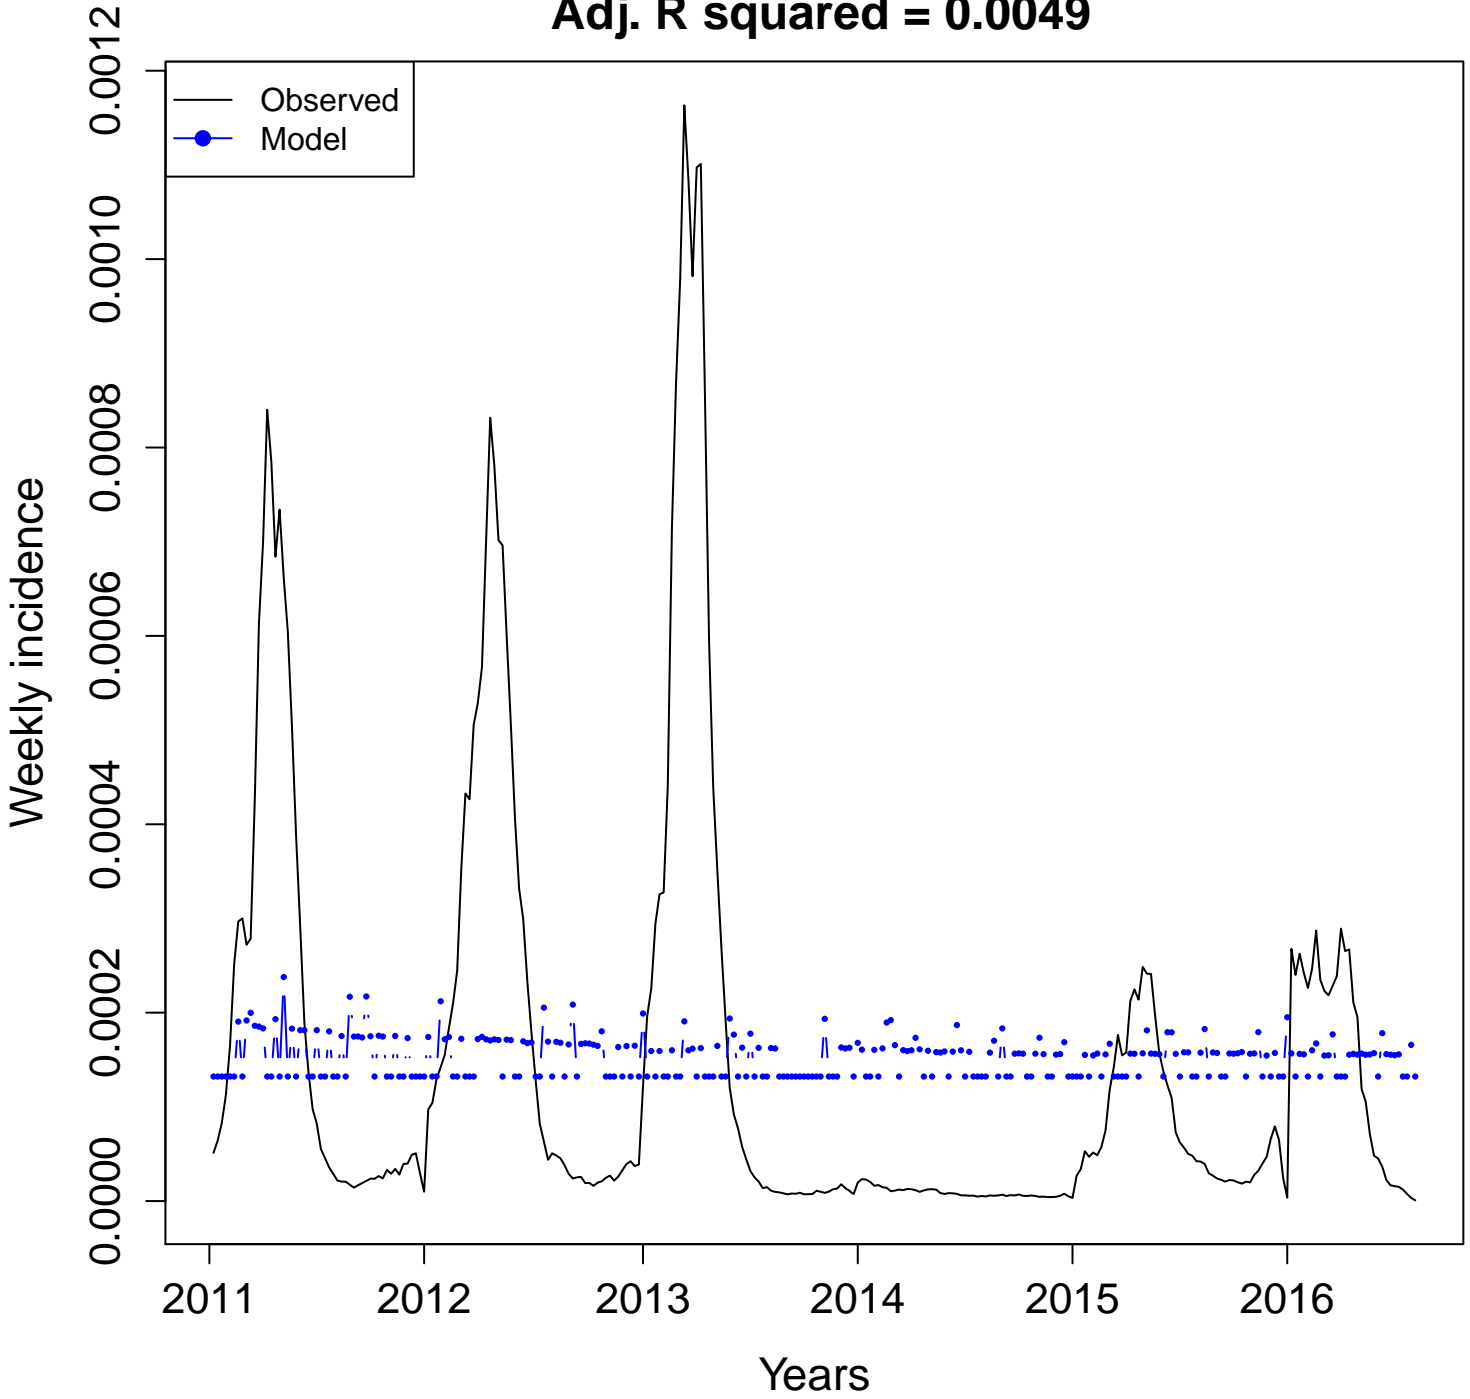



**RJ- mosquito.dengue**  
**Adj. R squared = 0.1252**

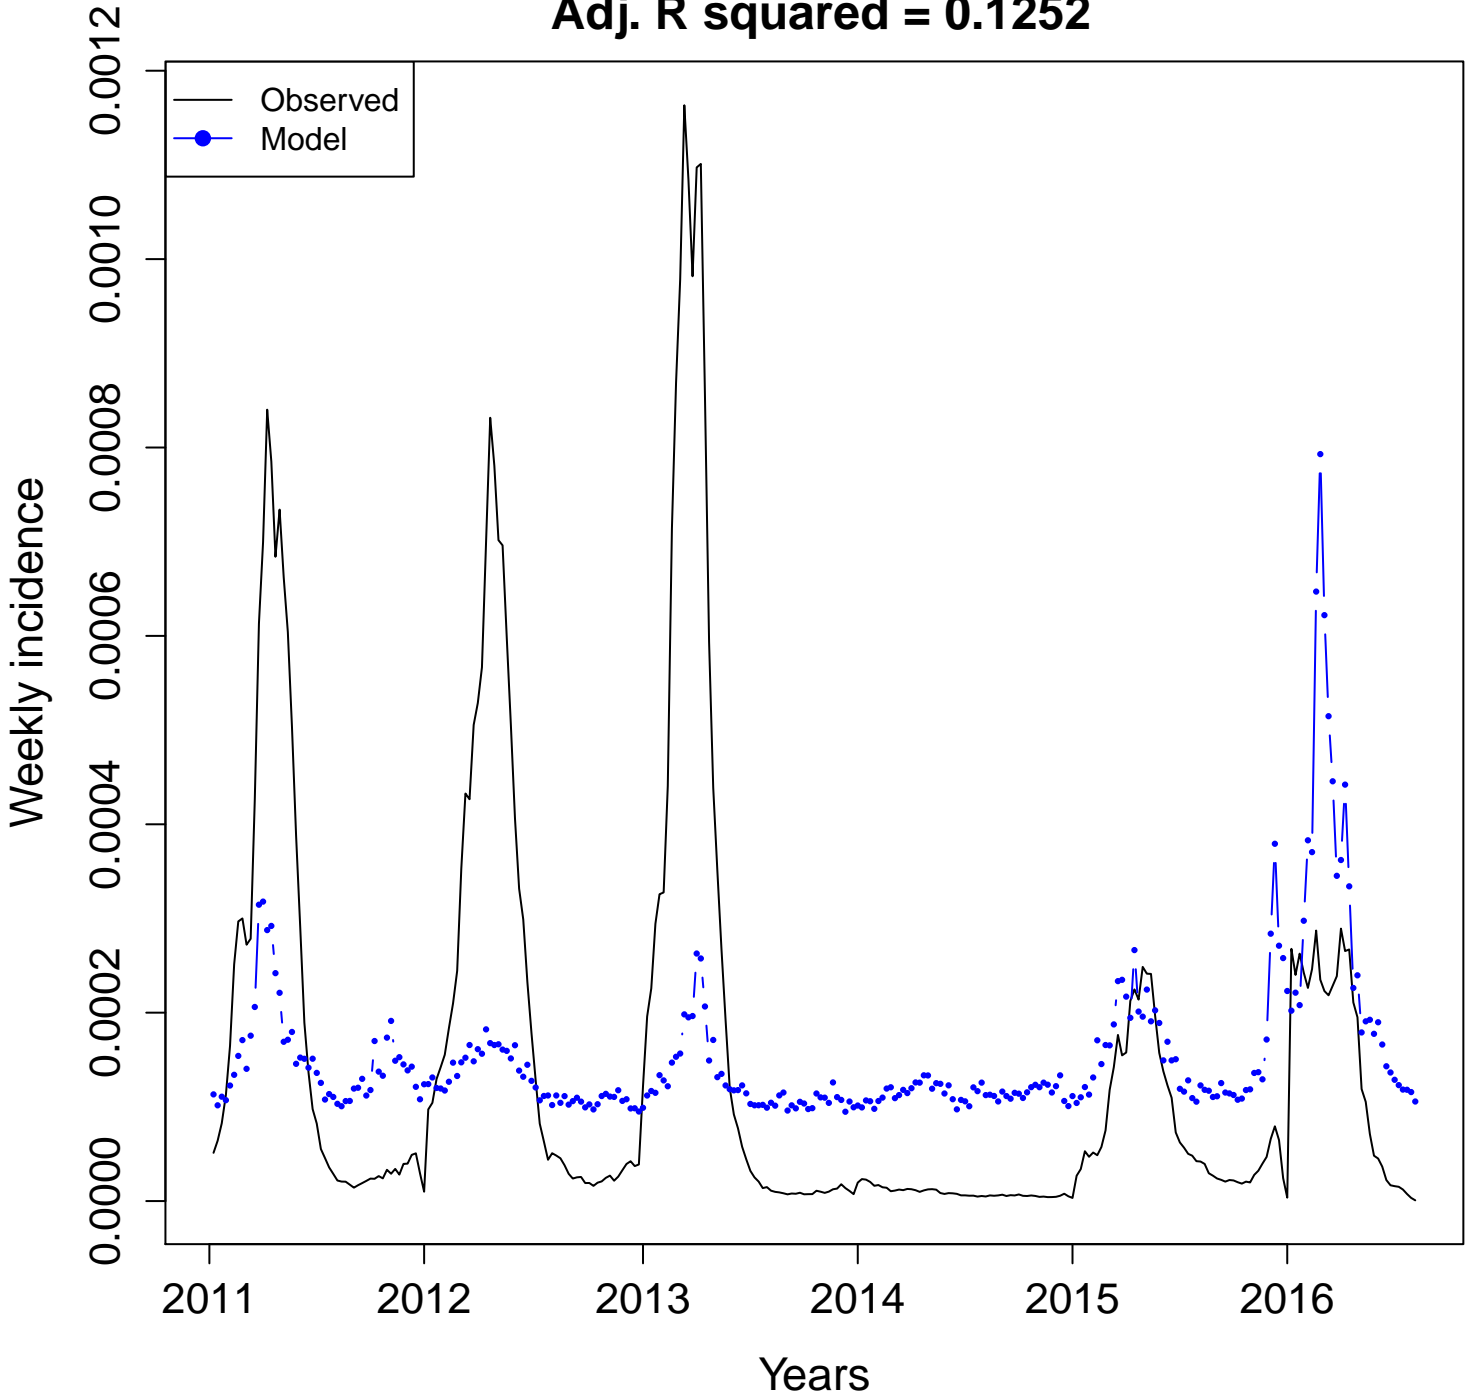

# RJ- mosquito

Adj. R squared = 0.036

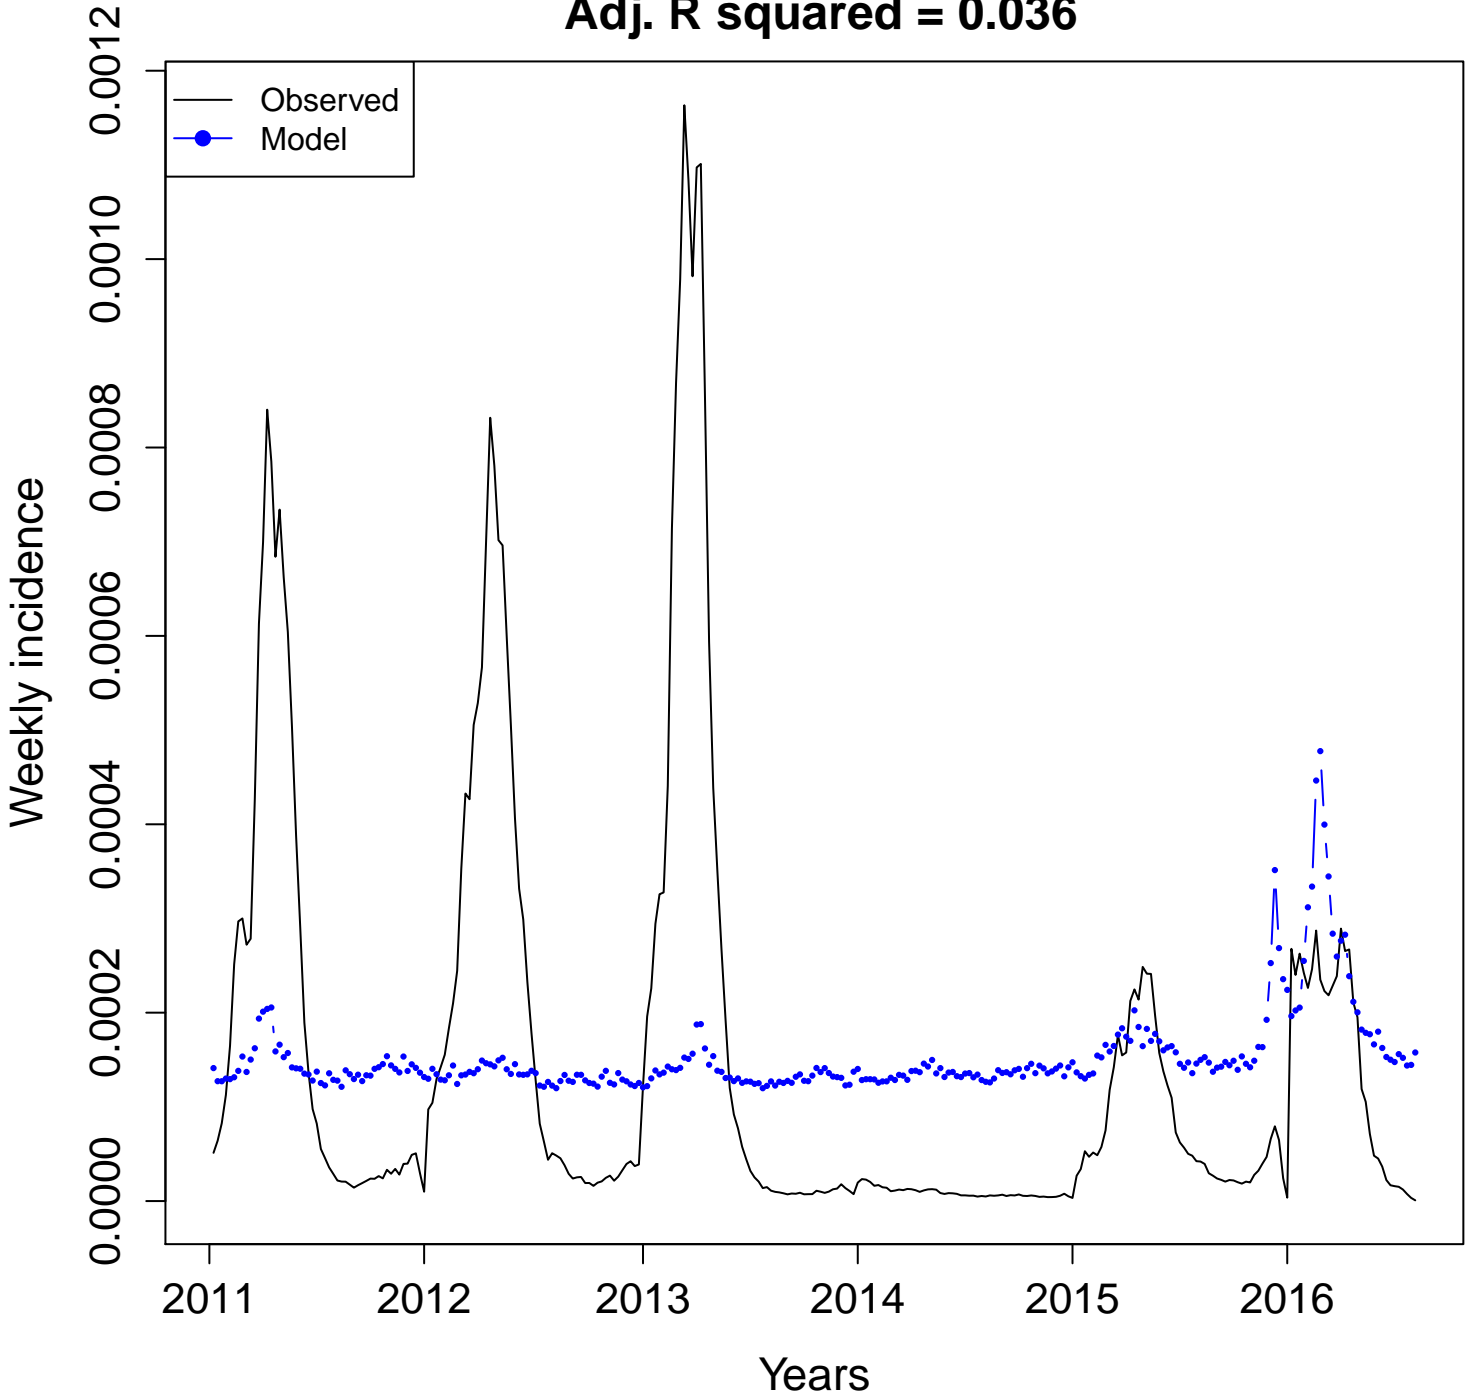

# RJ- mosquitoes

Adj. R squared = 0.0189

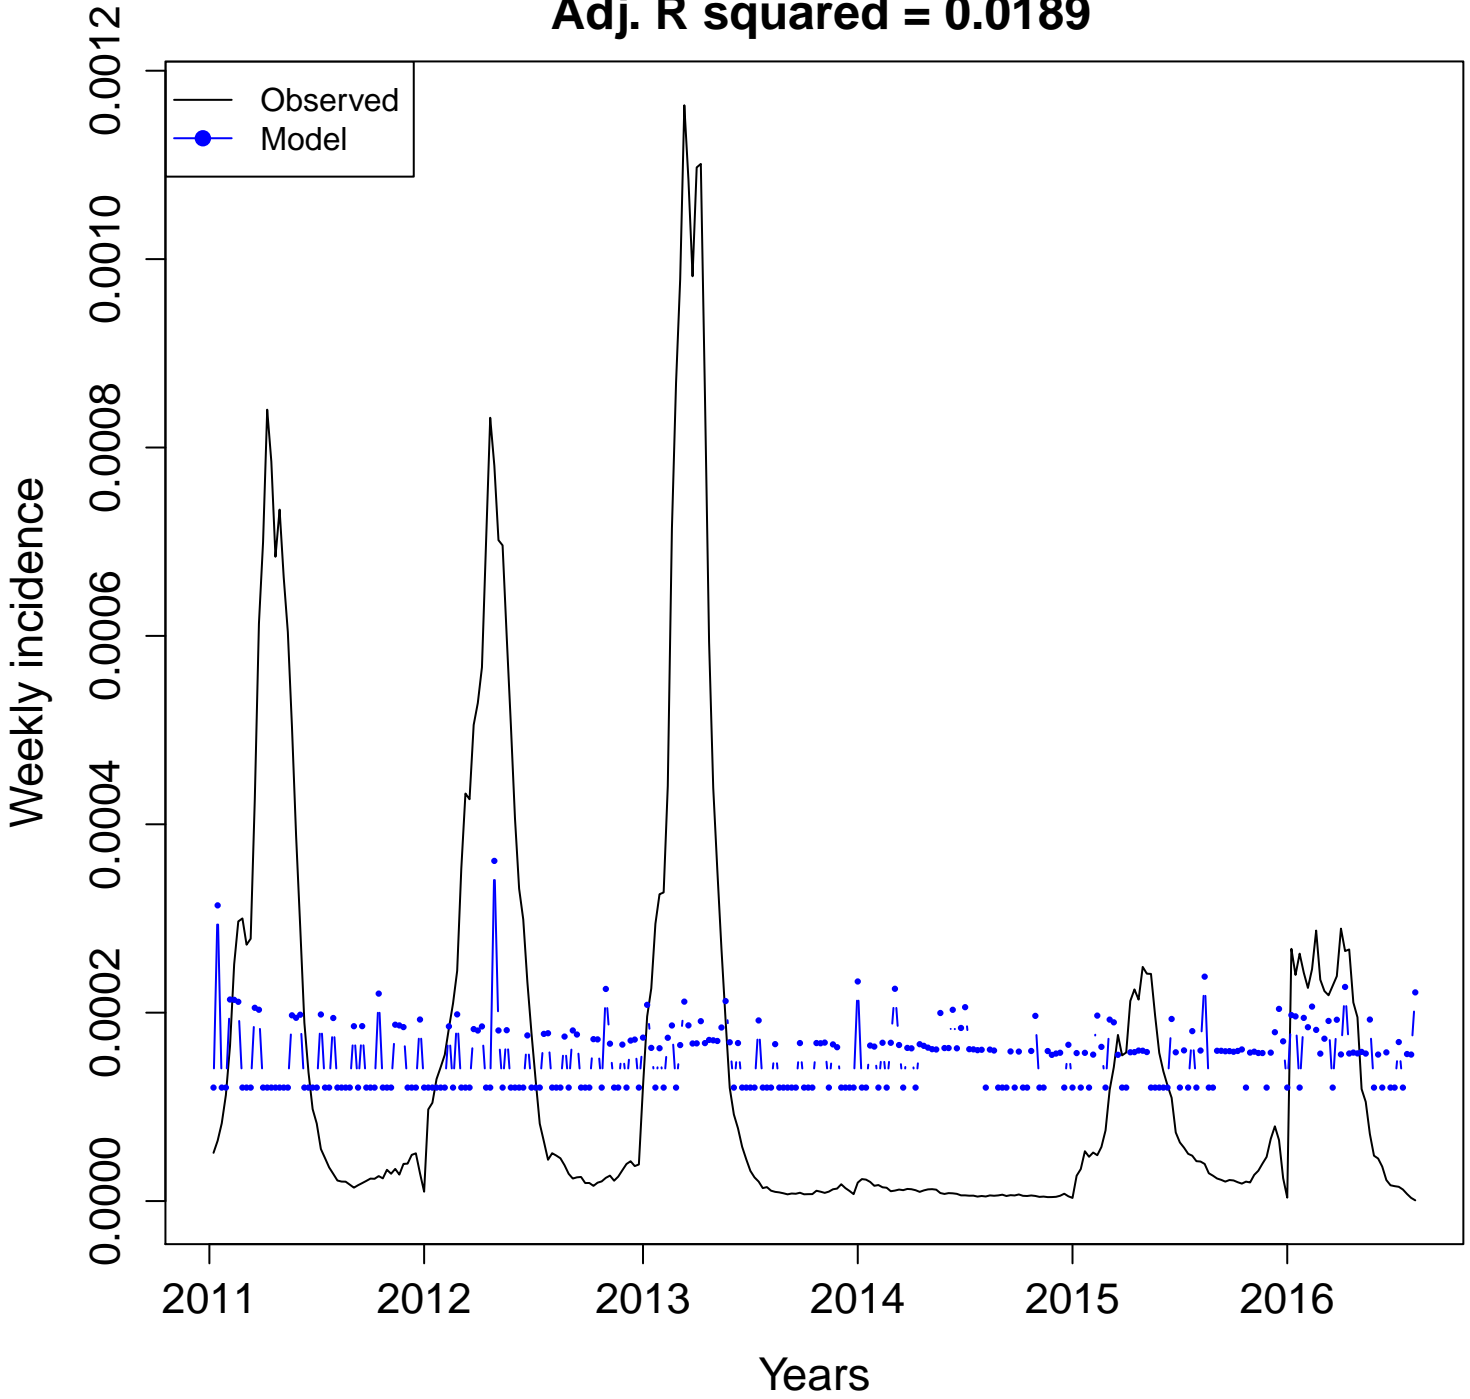

**RJ- sintomas.da.dengue**  
**Adj. R squared = 0.5297**

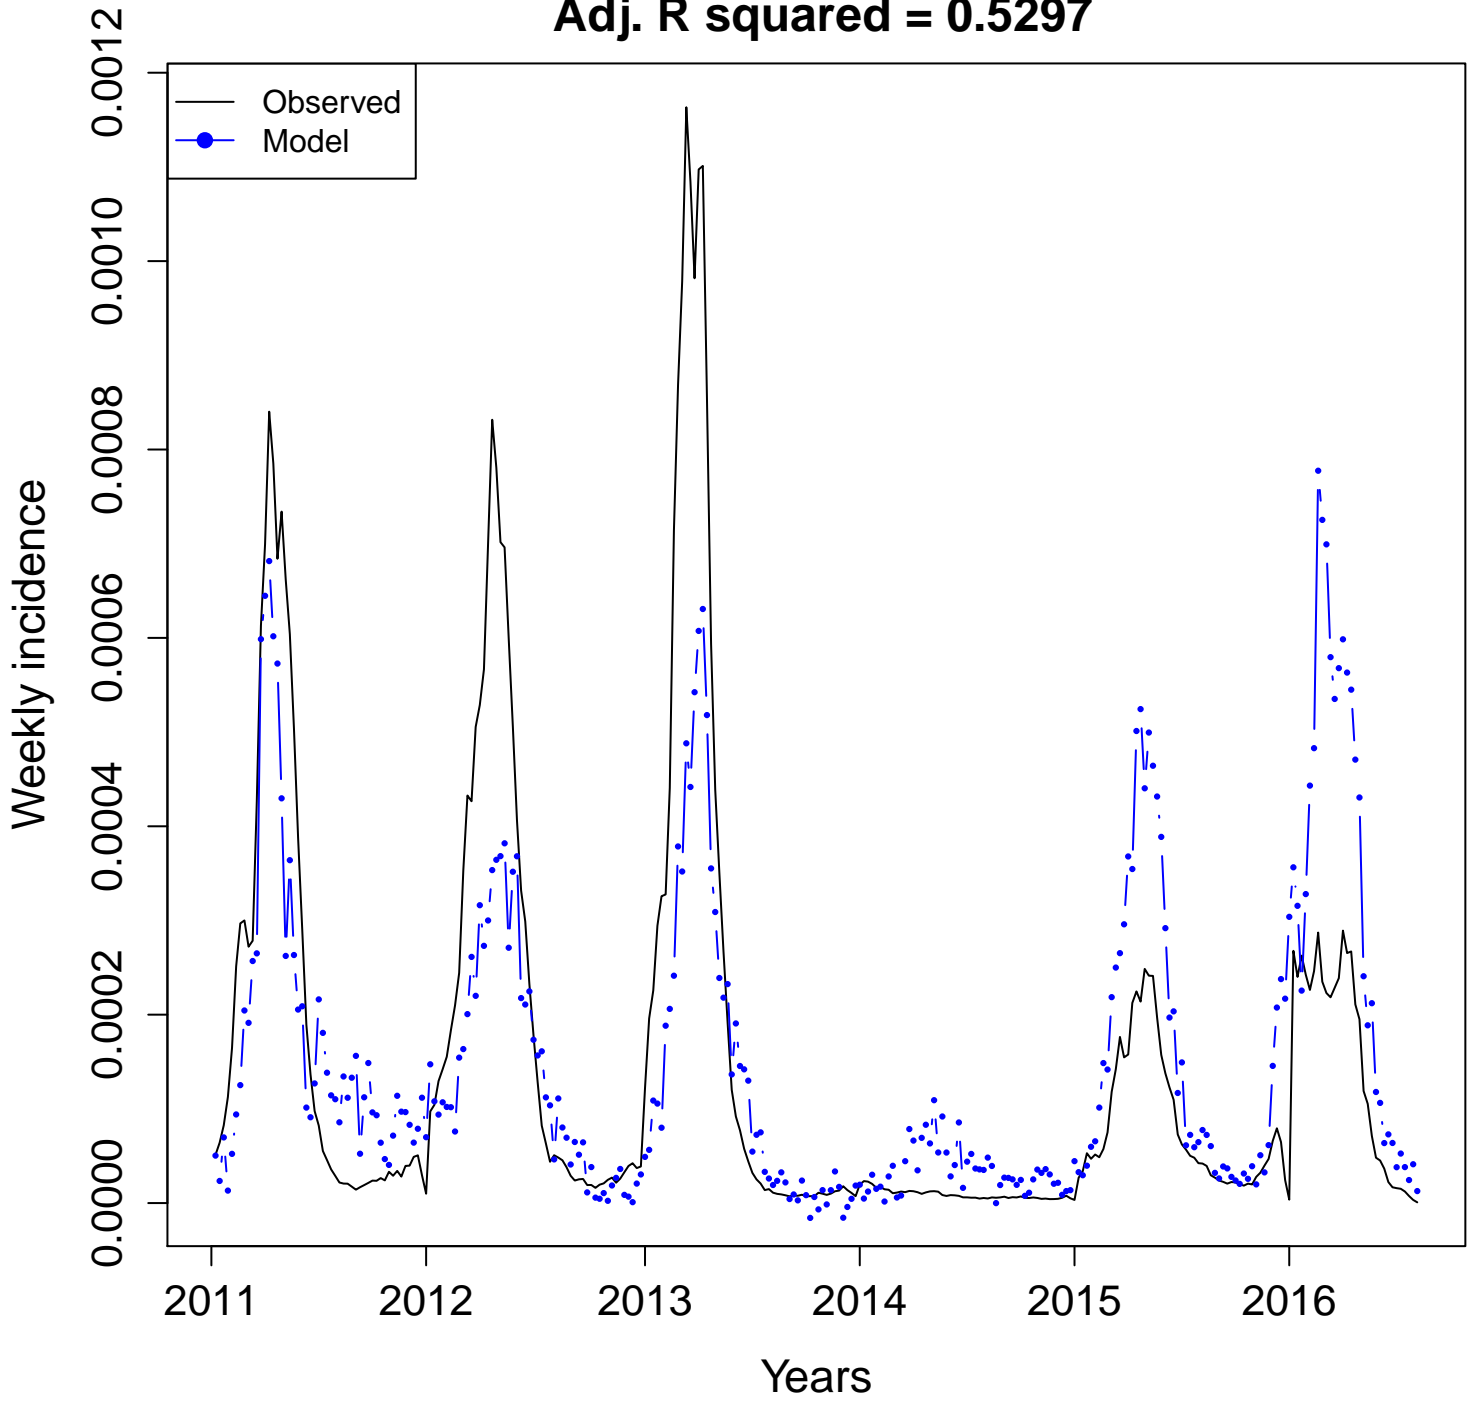

# Rio Grande do Norte (RN)

## Dengue incidence vs. Google Health Trends (2011–2016)

### Definitions:

- **Combined terms:**
  - **All:** model with all the available terms.  $n =$  number of terms
  - **Four:** model with "dengue", "dengue sintomas", "aedes", and "mosquito".
  - **Uncorrelated:** model with non-correlated terms.  $n =$  number of uncorrelated terms
- **Individual terms:** Plots developed with one term at a time.
- Terms for all and uncorrelated models can be found in additional file 3.

**Combined terms  
Adjusted R squared**

**Rio Grande do  
Norte (RN)**

**All**  
**(n = 9)**

**BR-RN**  
**Adj. R squared = 0.89**

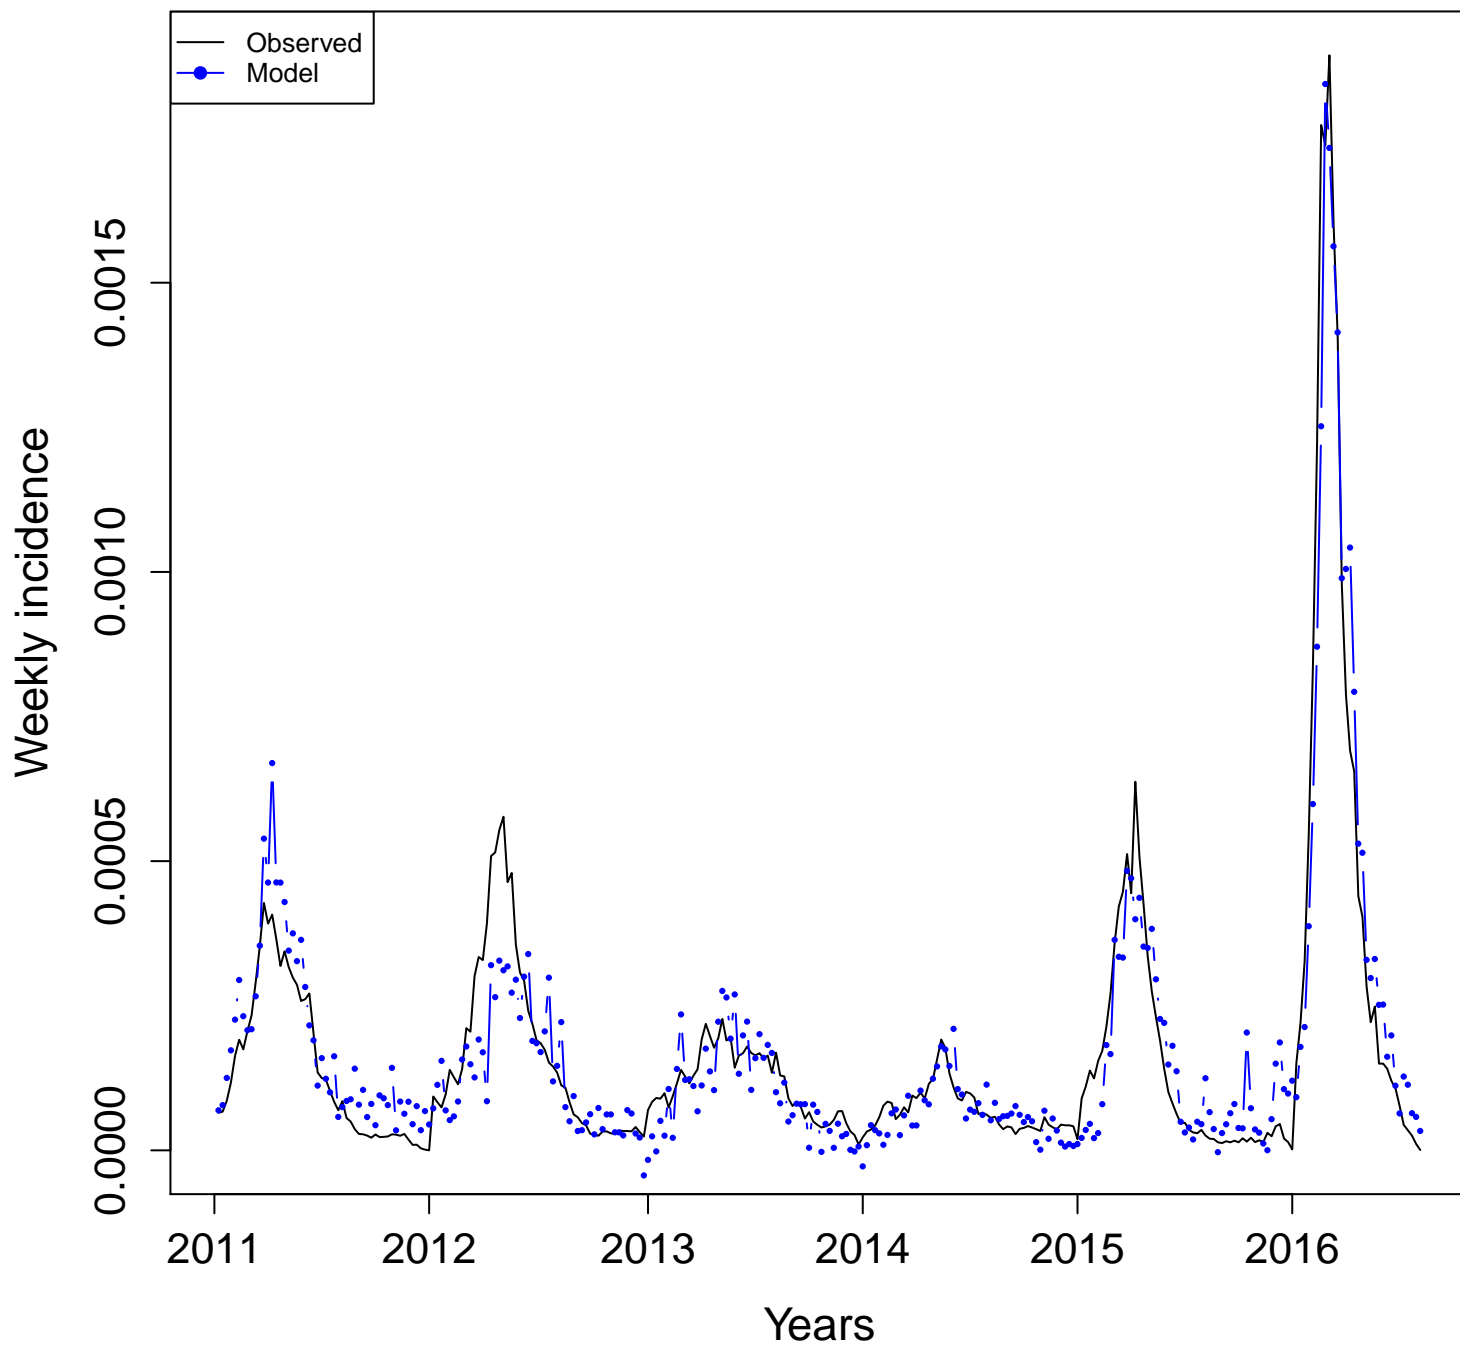

**BR-RN**  
**Adj. R squared = 0.8913**

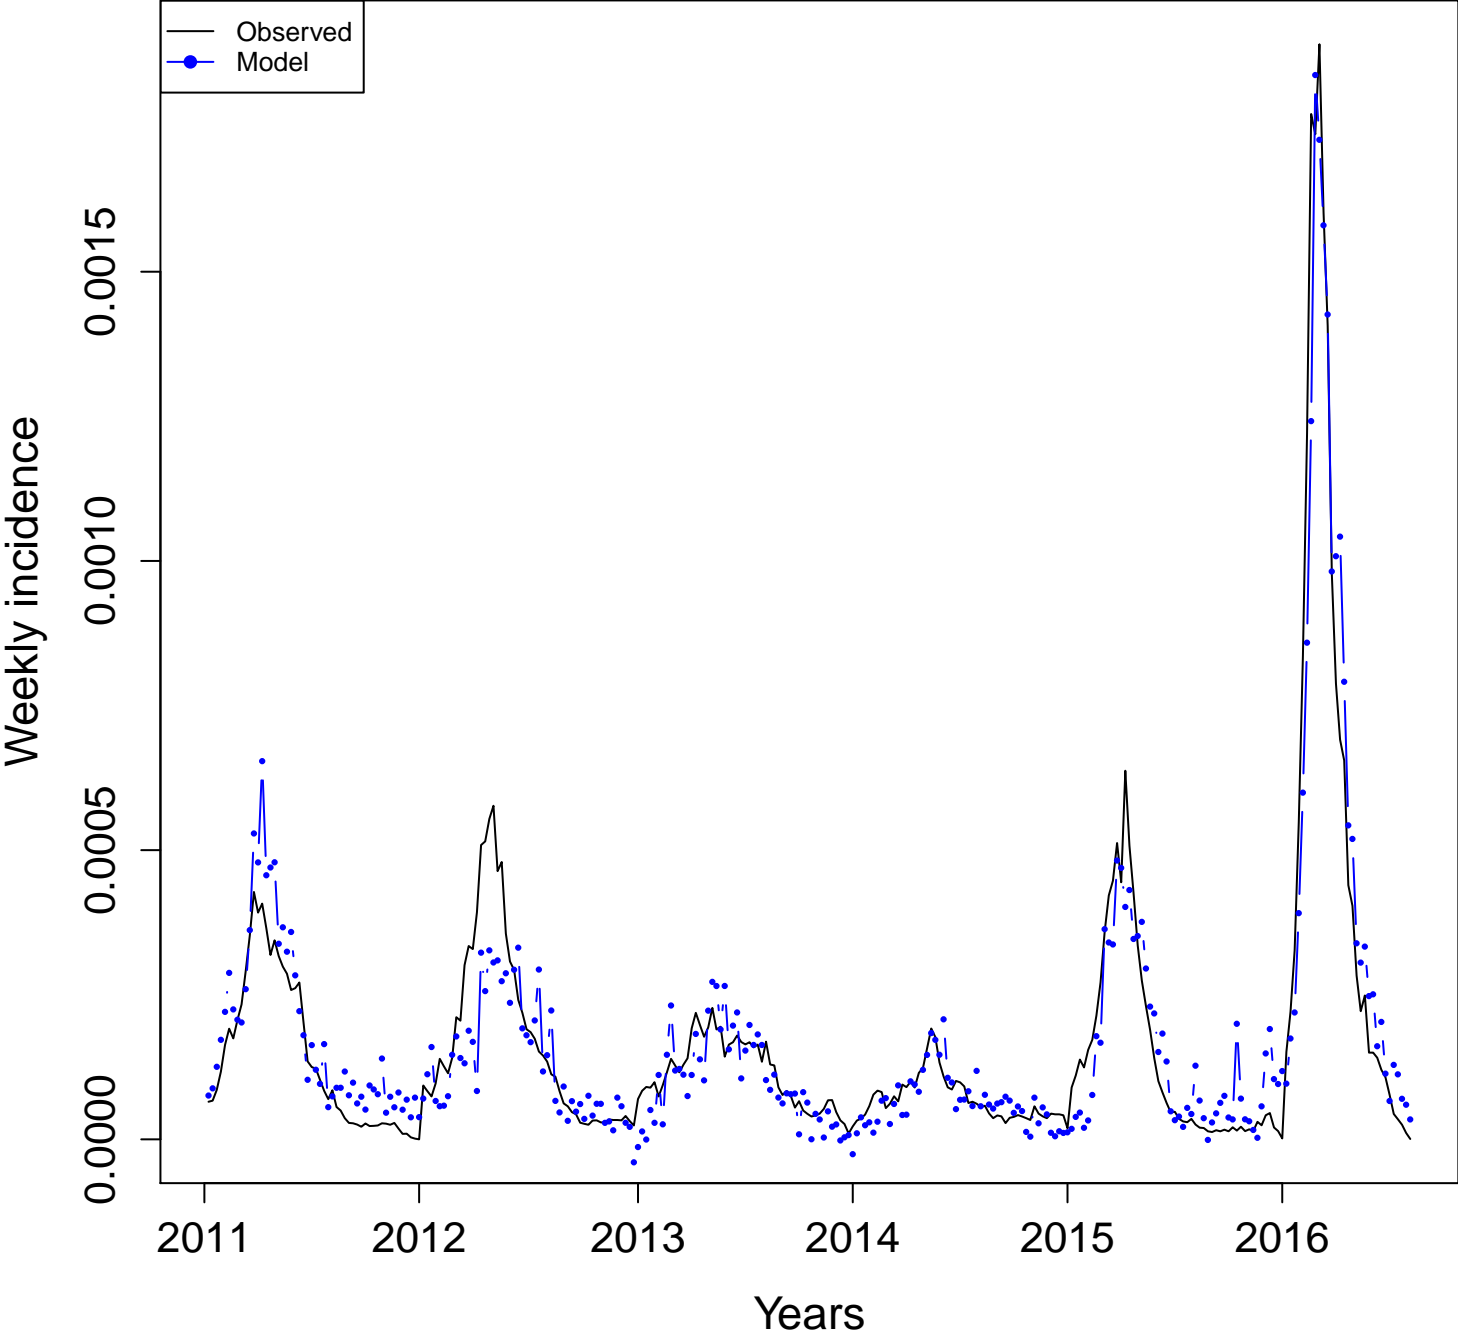



**Uncorrelated  
(n = 2)**

**BR-RN  
Adj. R squared = 0.7059**

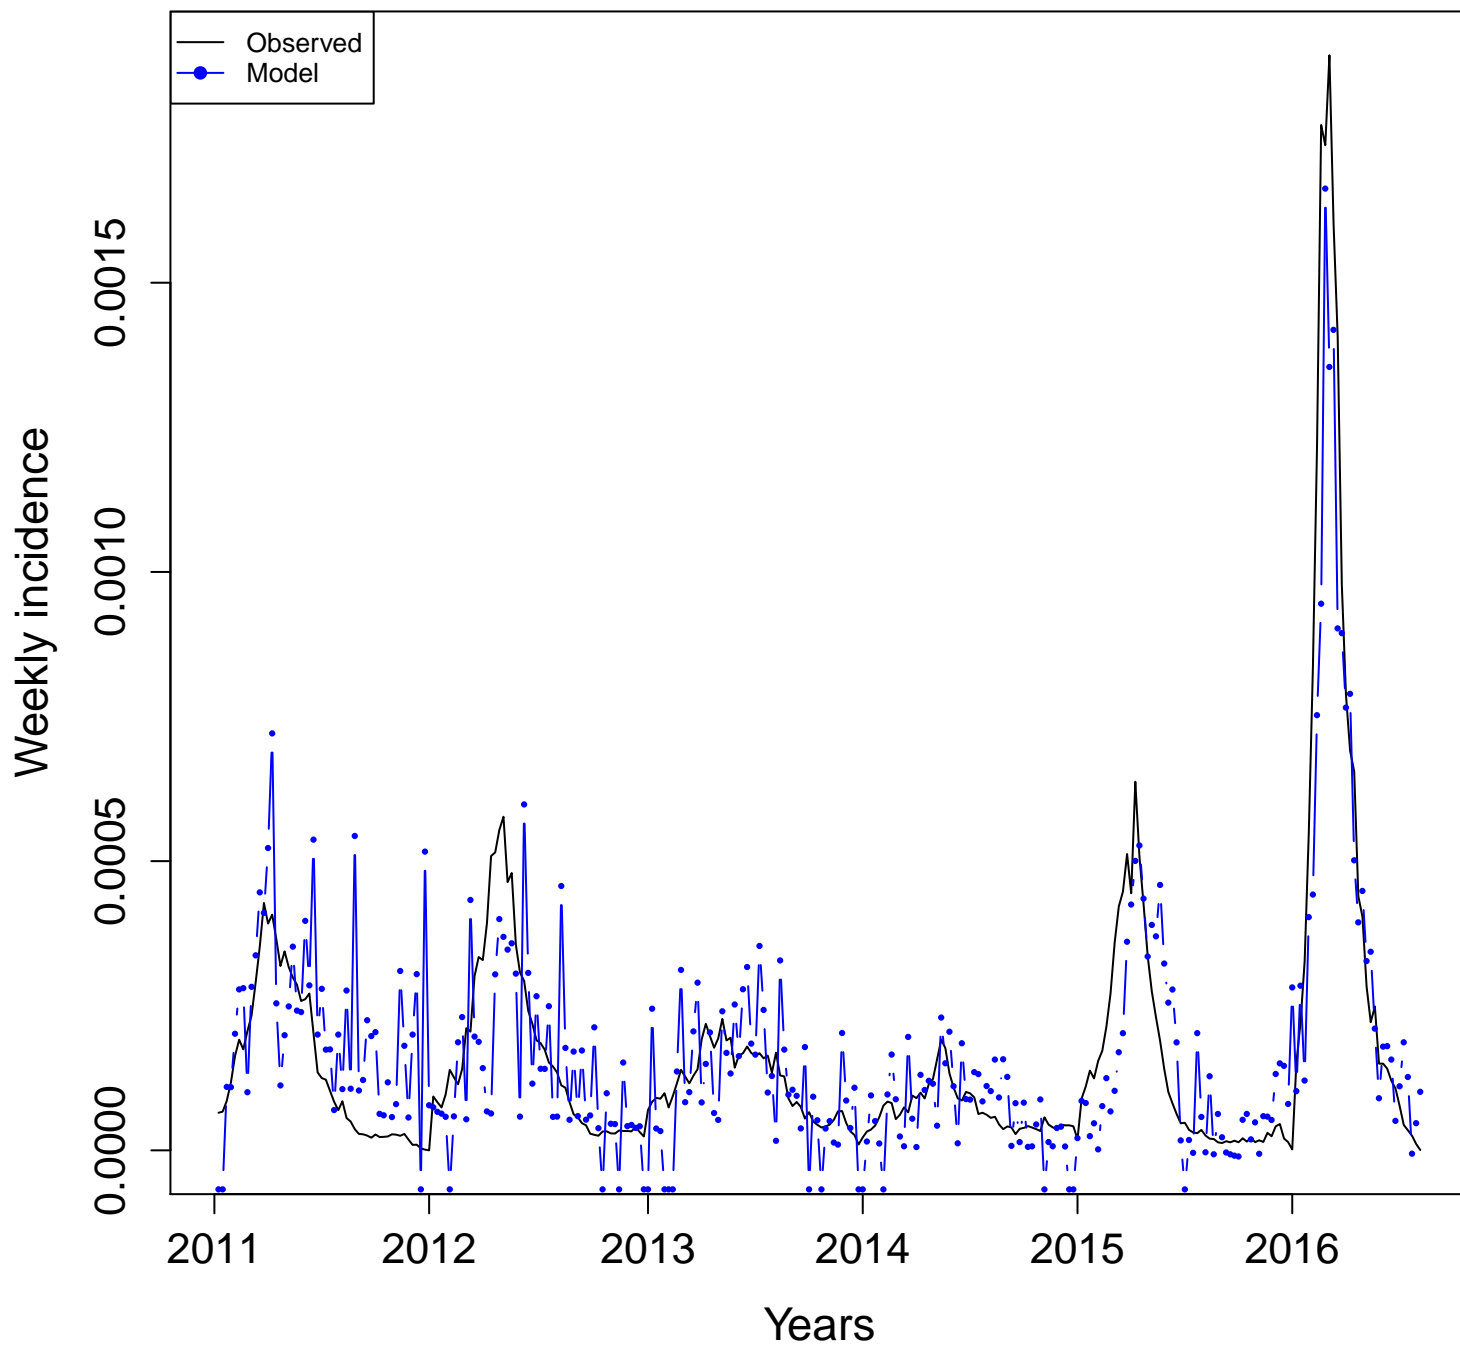

**Individual terms**  
**Adjusted R squared**

**Rio Grande do**  
**Norte (RN)**

**RN- aedes.aegypti**  
**Adj. R squared = 0.6853**

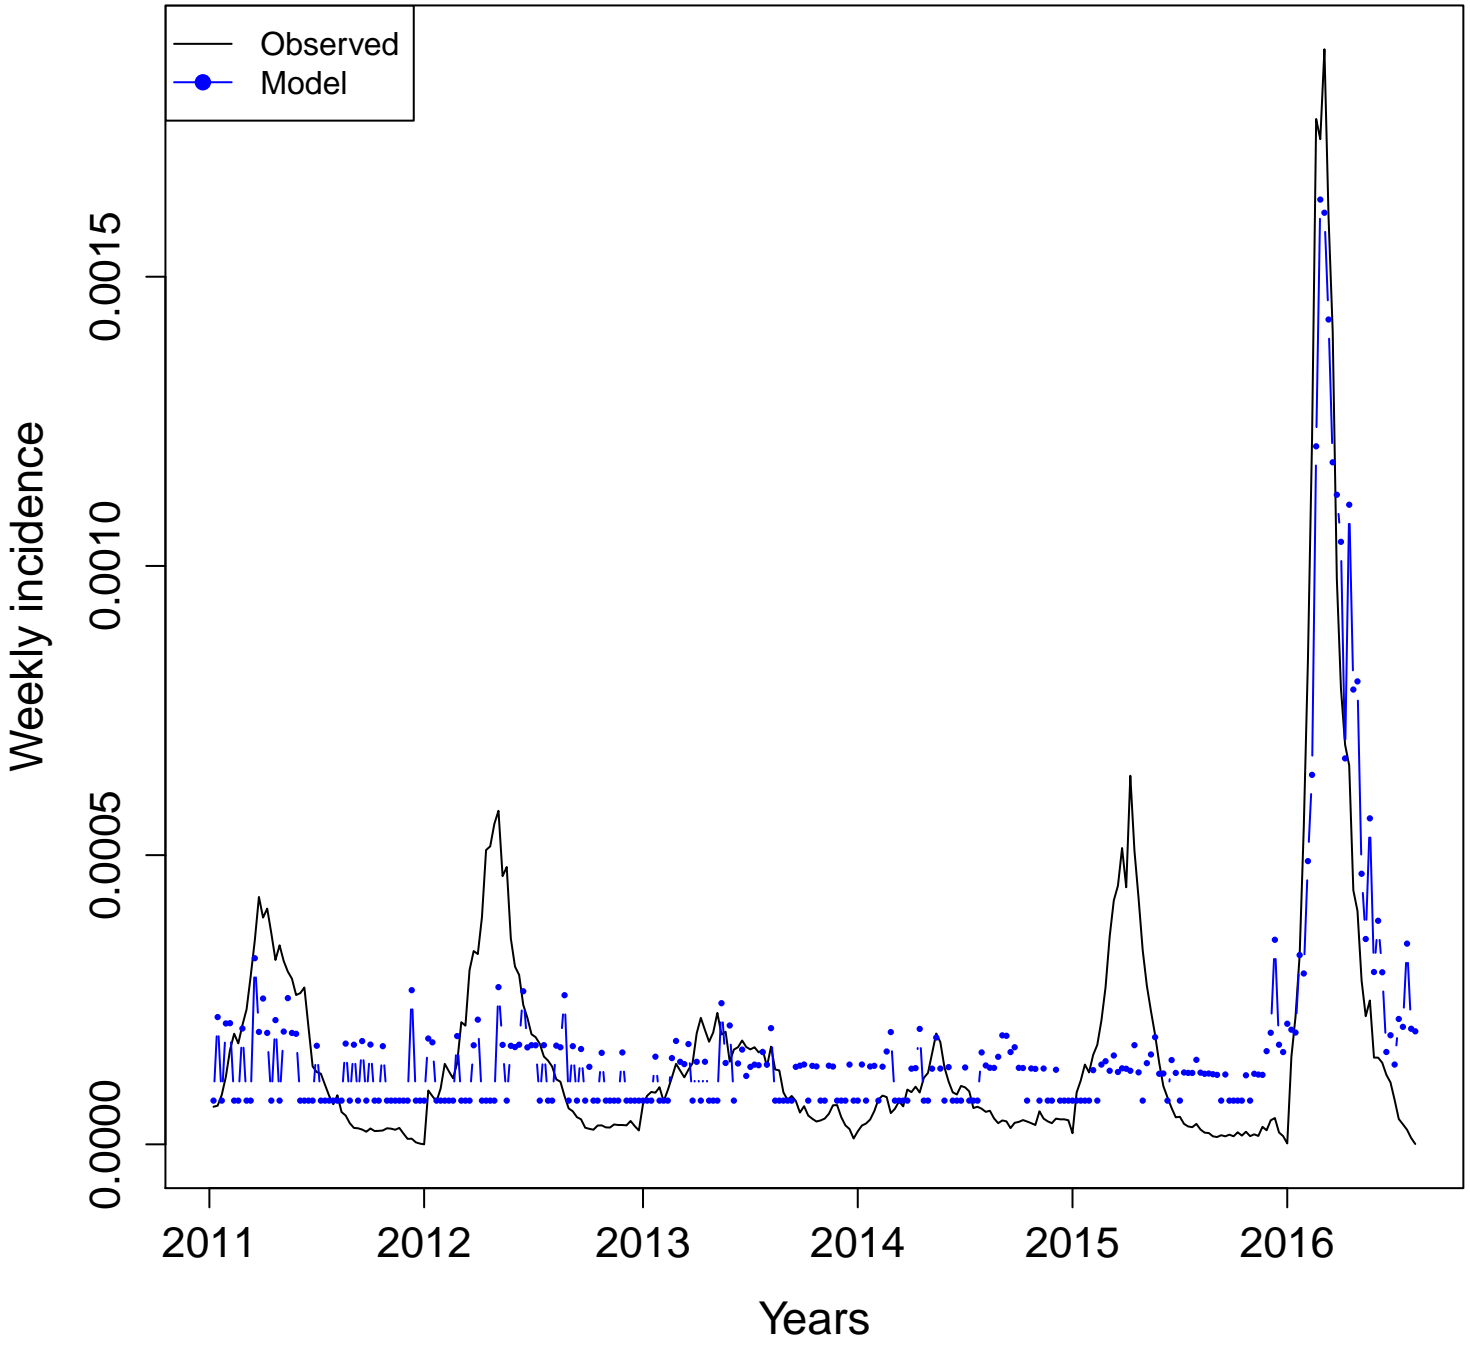

# RN- aedes

Adj. R squared = 0.7057

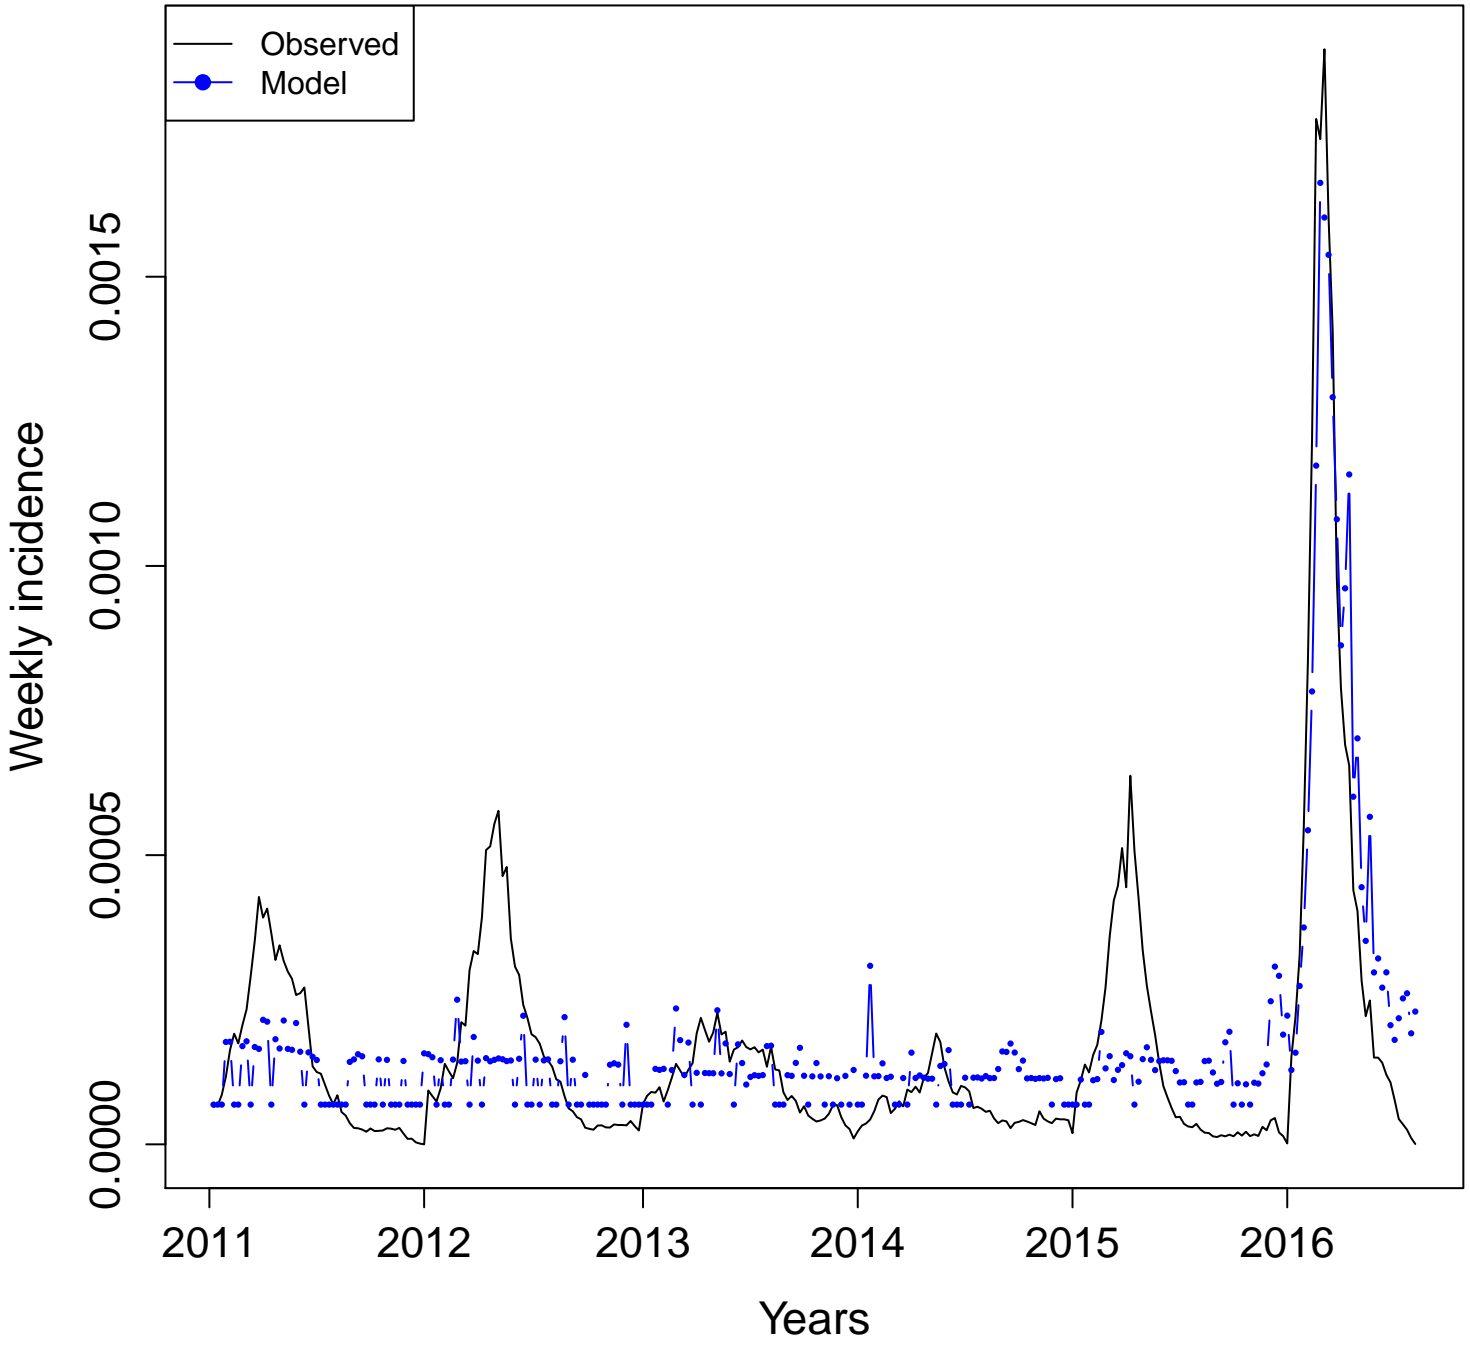

# RN- aegypti

Adj. R squared = 0.6897

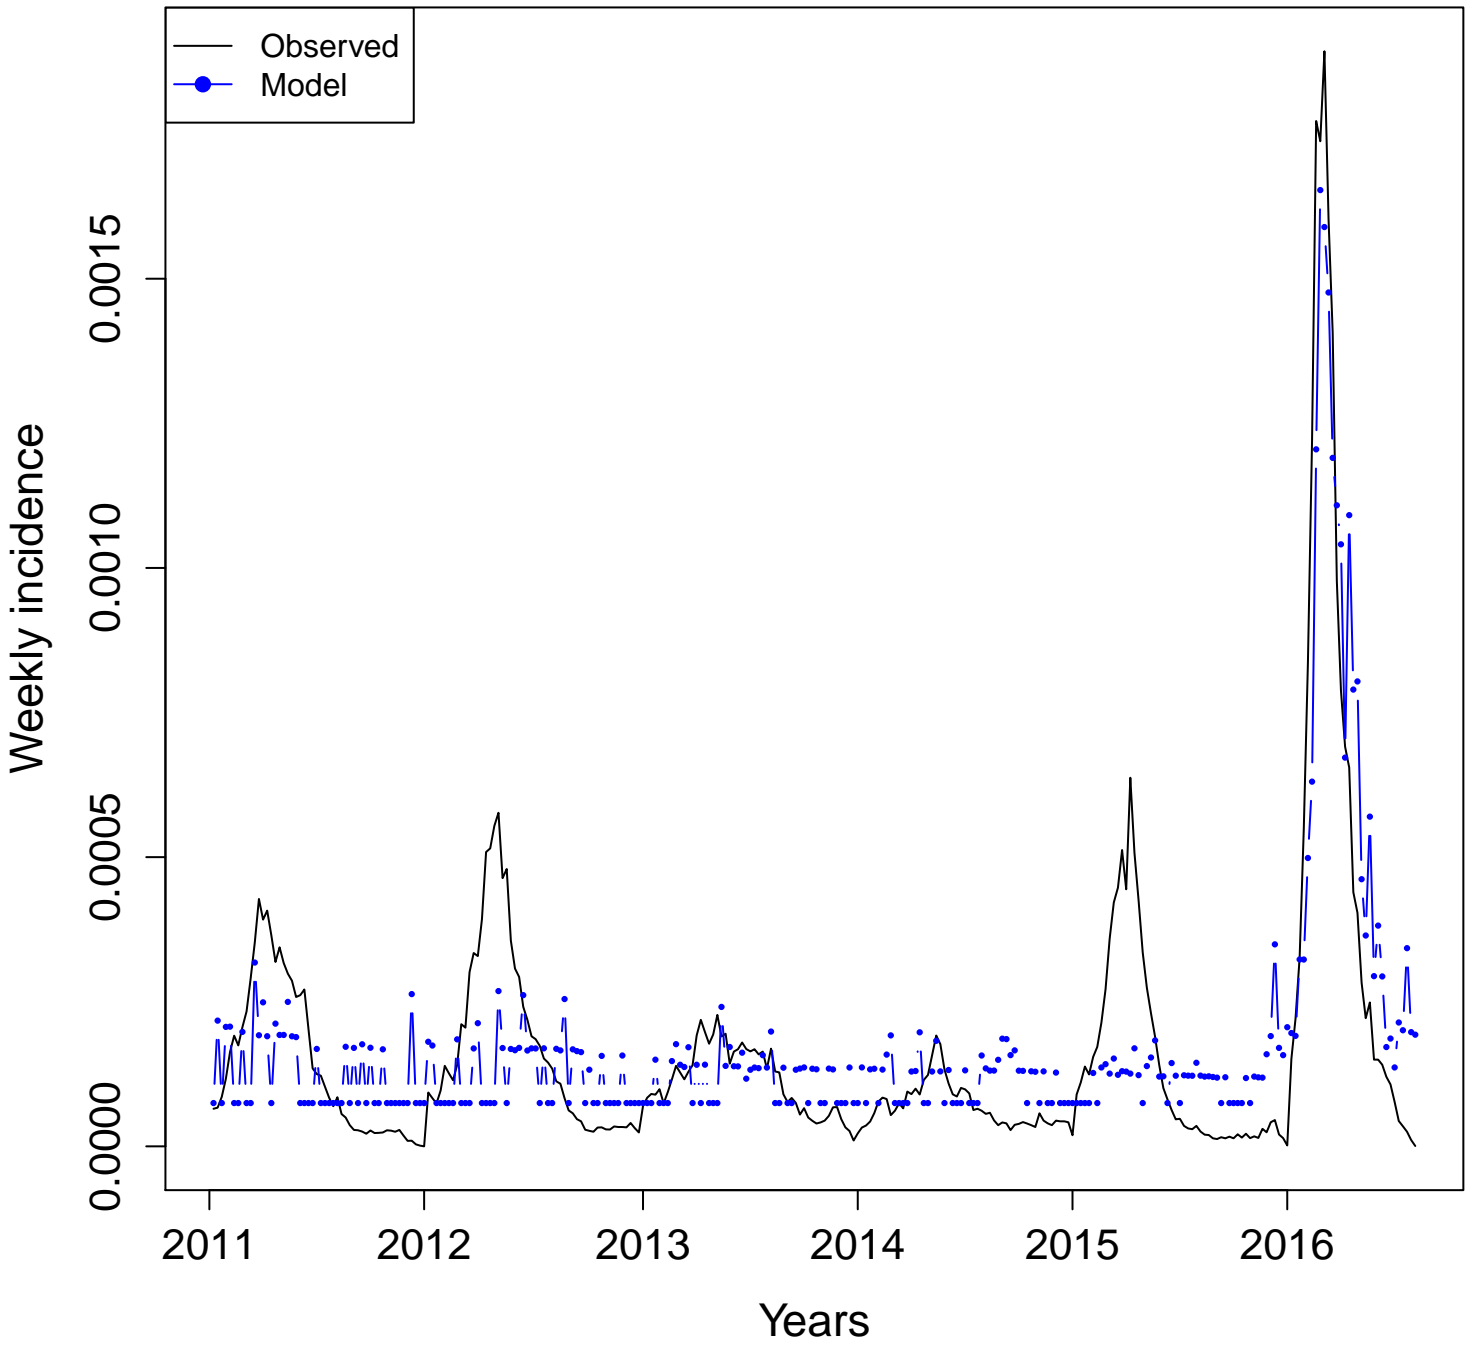

**RN- dengue**  
**Adj. R squared = 0.8693**

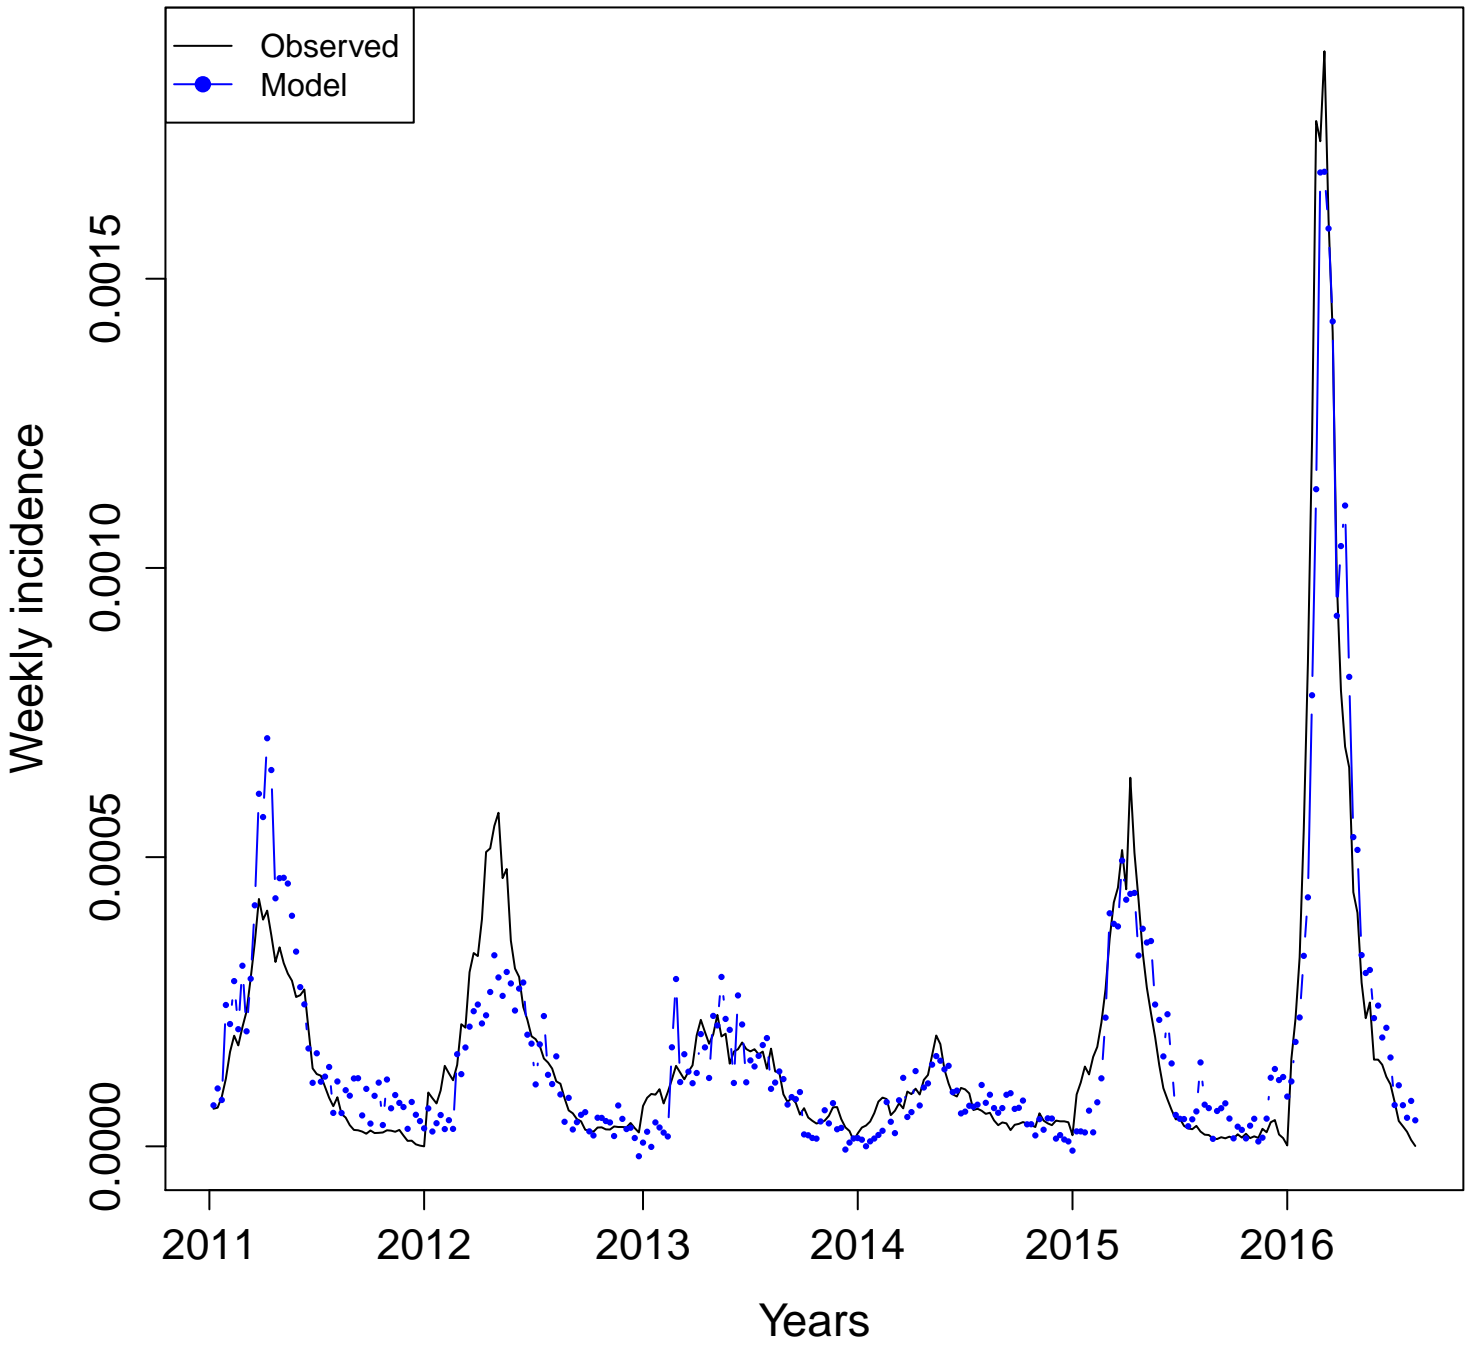

**RN- dengue.sintomas**  
**Adj. R squared = 0.7542**

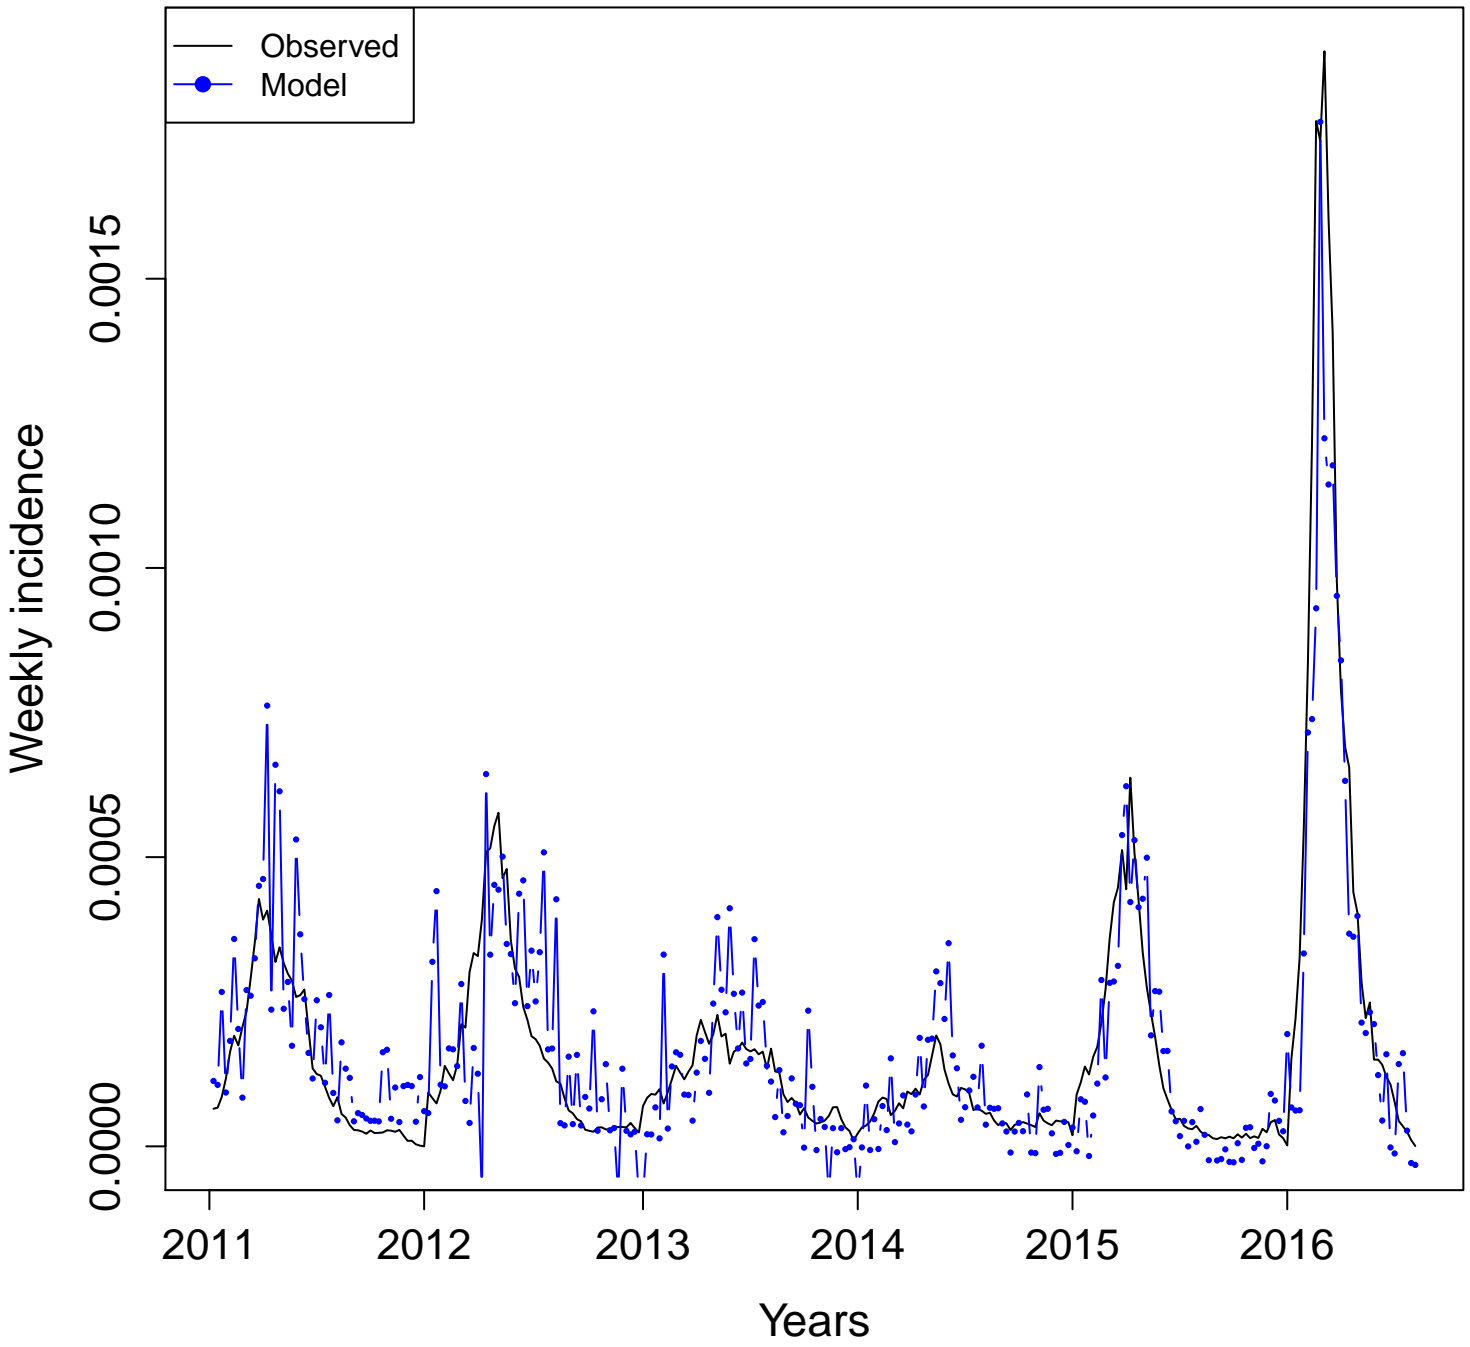

# RN- dengue.virus

Adj. R squared = 0.4253

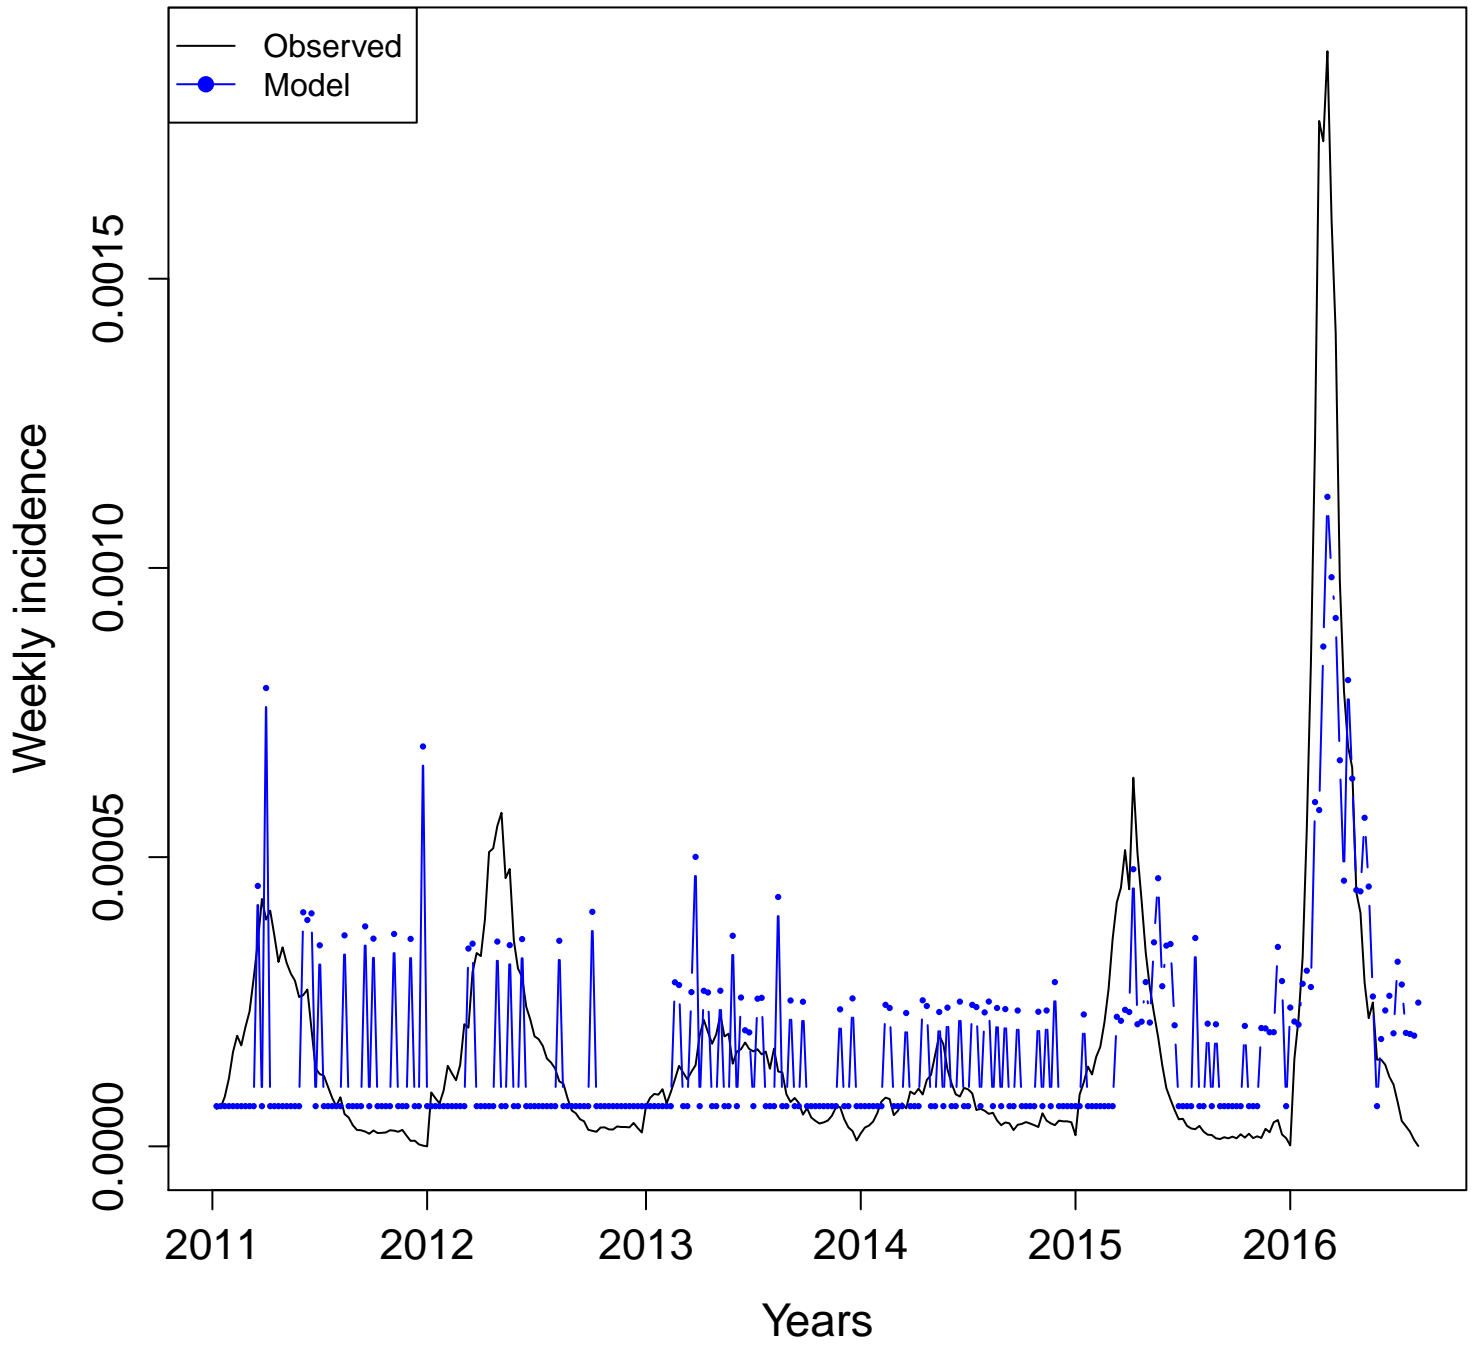



**RN- mosquito.dengue**  
**Adj. R squared = 0.7768**

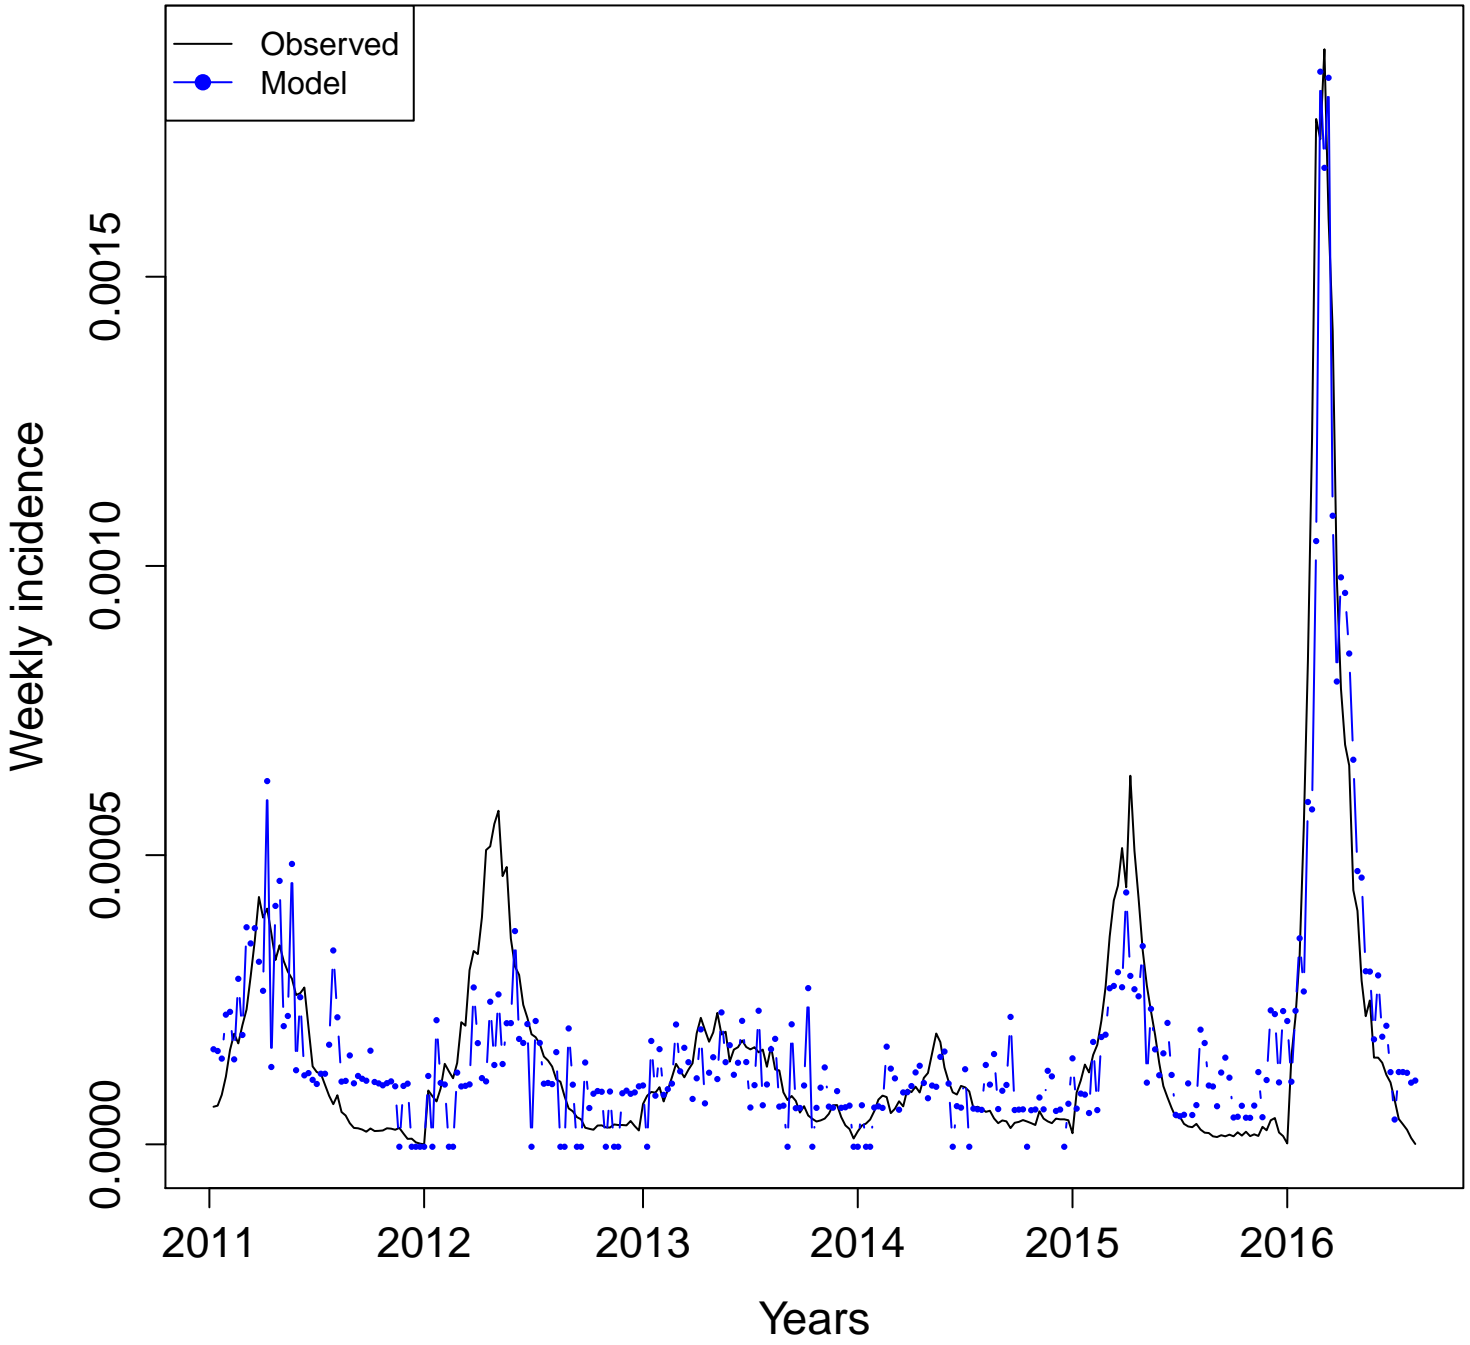

# RN- mosquito

Adj. R squared = 0.7295

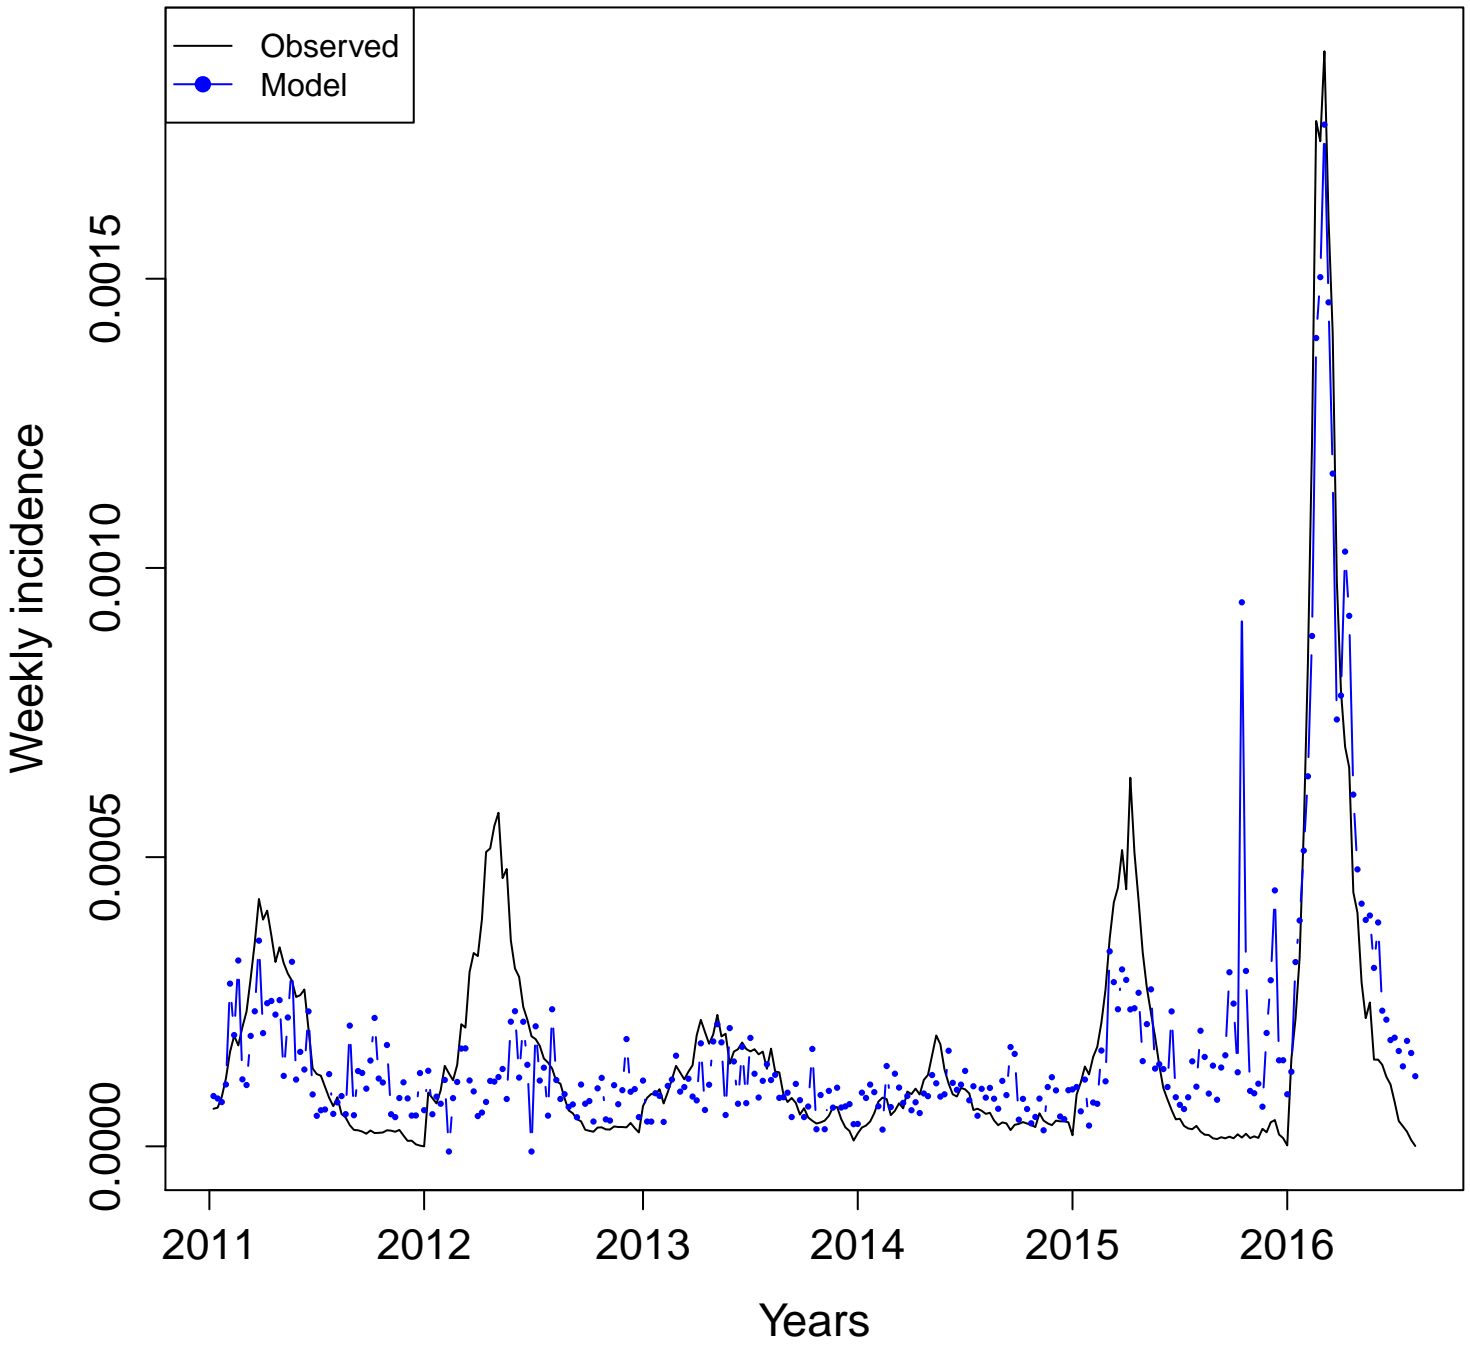

**RN- sintomas.da.dengue**  
**Adj. R squared = 0.6314**

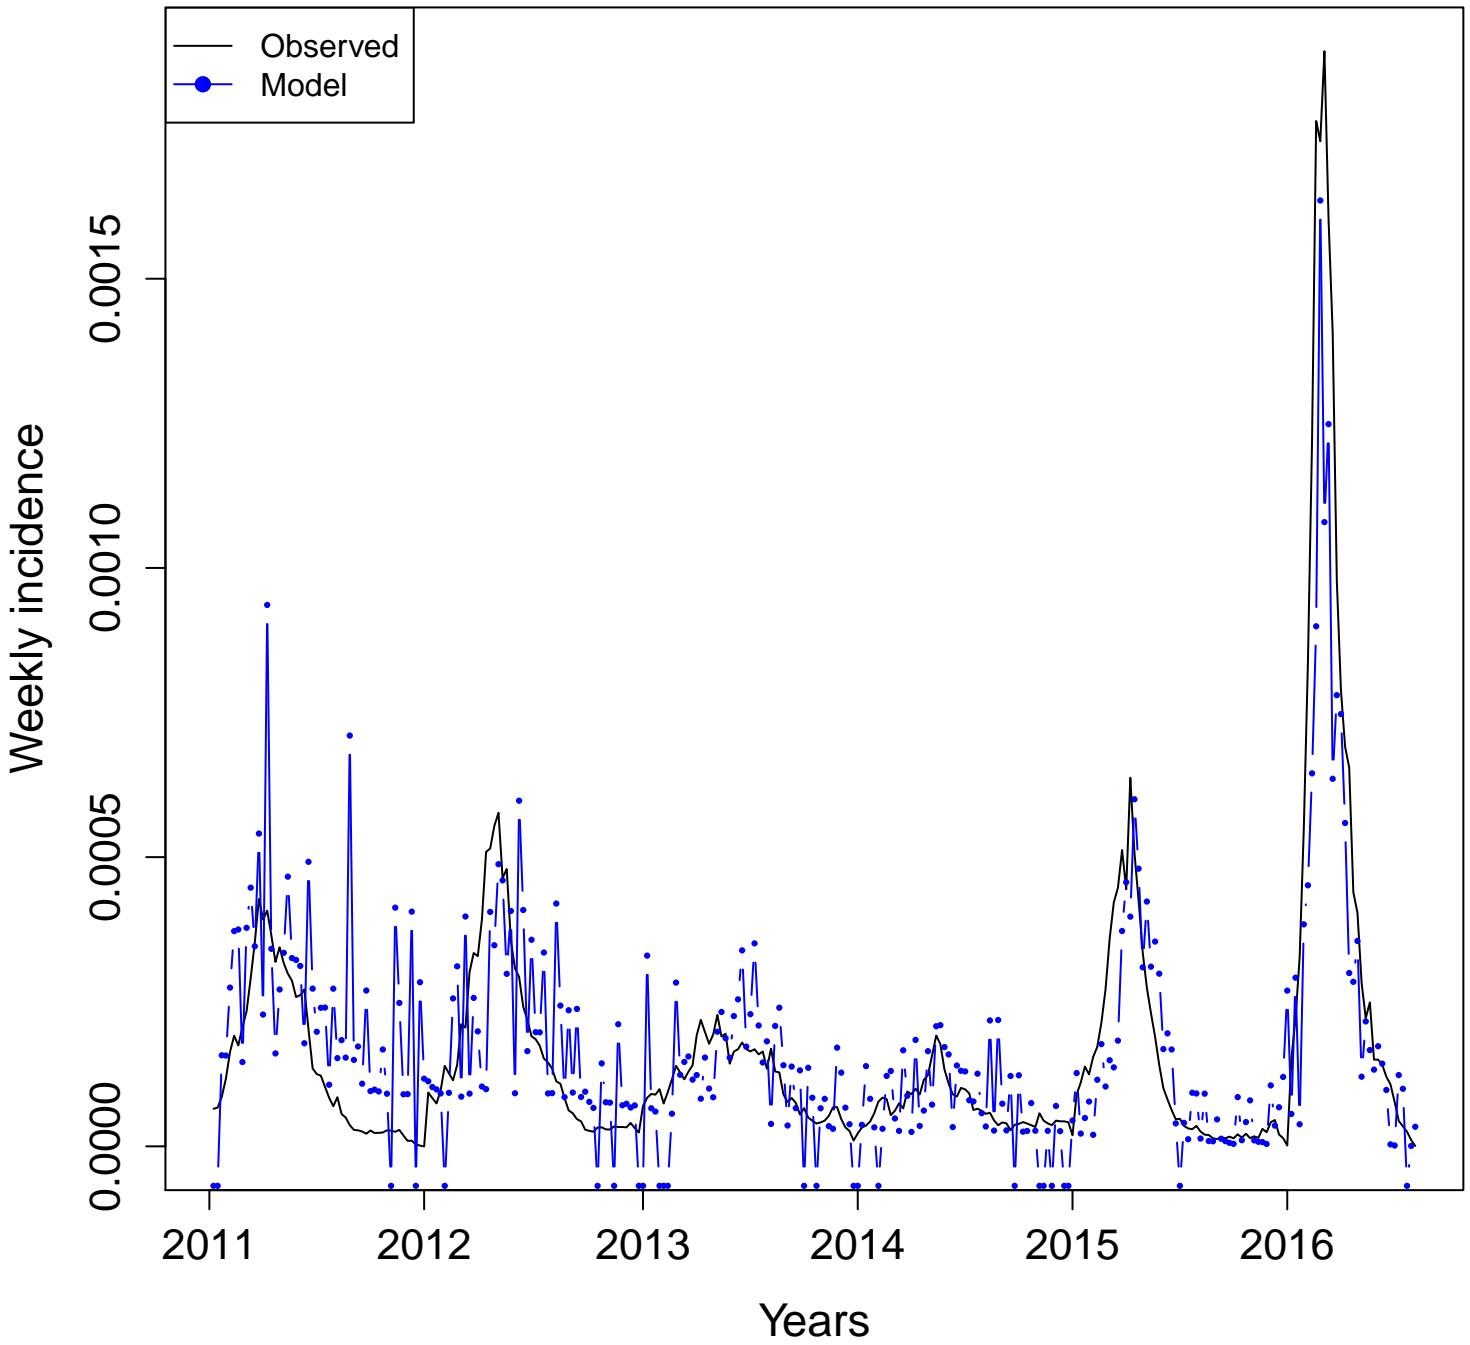

## Rôndonia (RO)

# Dengue incidence vs. Google Health Trends (2011–2016)

### Definitions:

- **Combined terms:**
  - **All:** model with all the available terms.  $n =$  number of terms
  - **Four:** model with "dengue", "dengue sintomas", "aedes", and "mosquito".
  - **Uncorrelated:** model with non-correlated terms.  $n =$  number of uncorrelated terms
- **Individual terms:** Plots developed with one term at a time.
- Terms for all and uncorrelated models can be found in additional file 3.

**Combined terms**  
**Adjusted R squared**

**Rôndonia (RO)**

**All**  
**(n = 9)**

**BR-RO**  
**Adj. R squared = 0.5676**

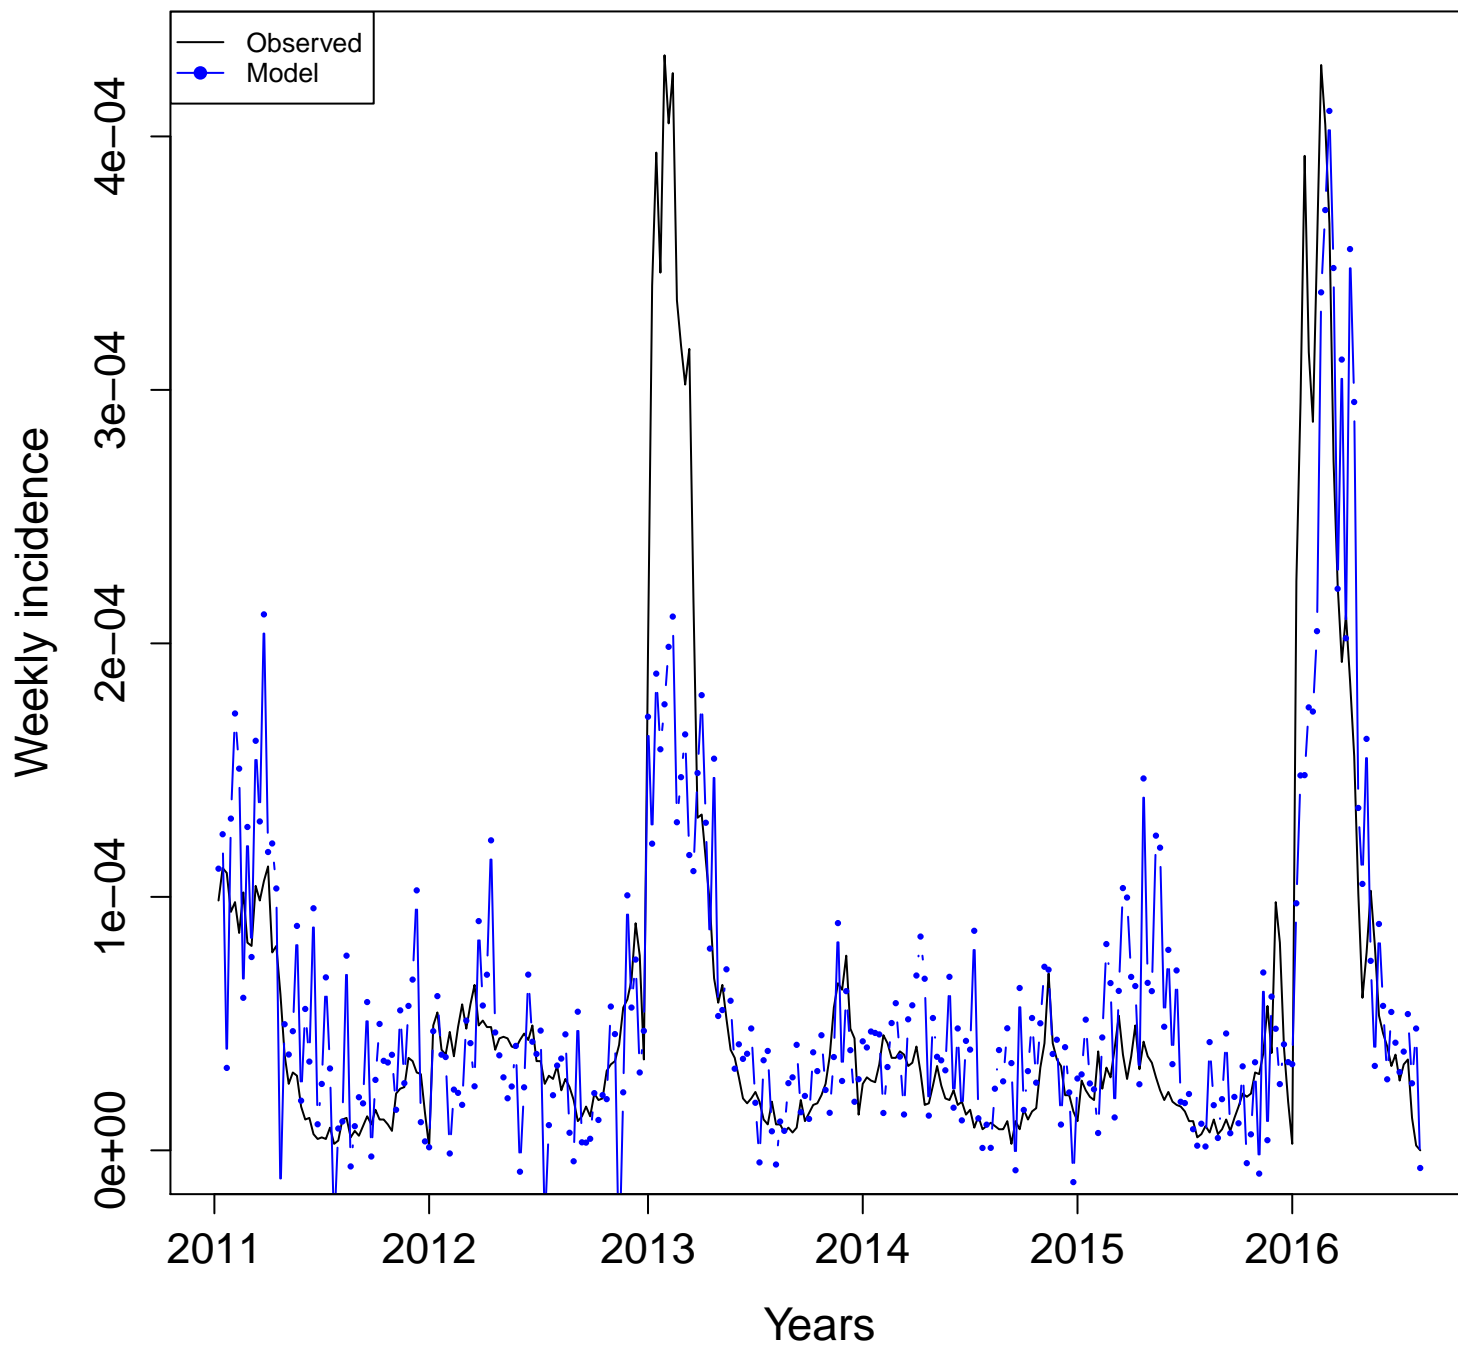

**BR-RO**  
**Adj. R squared = 0.5444**

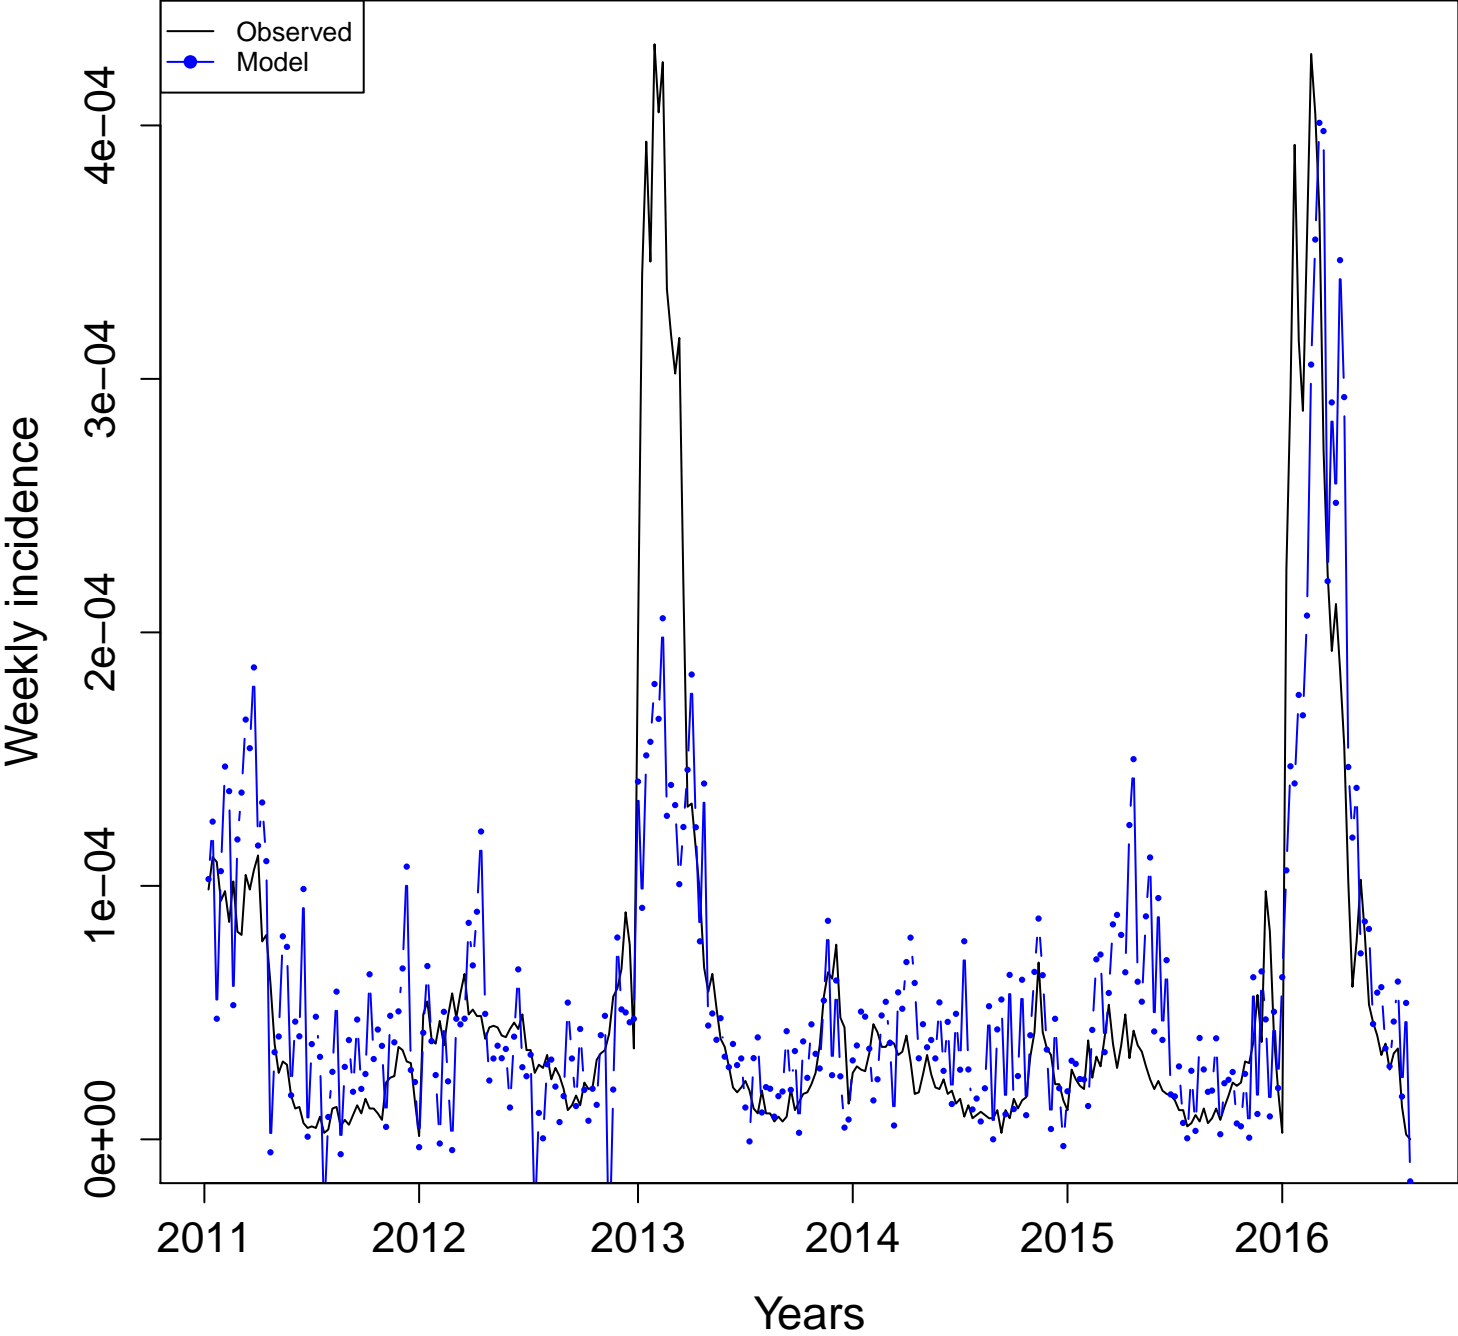

**Uncorrelated  
(n = 4)**

**BR-RO  
Adj. R squared = 0.4155**

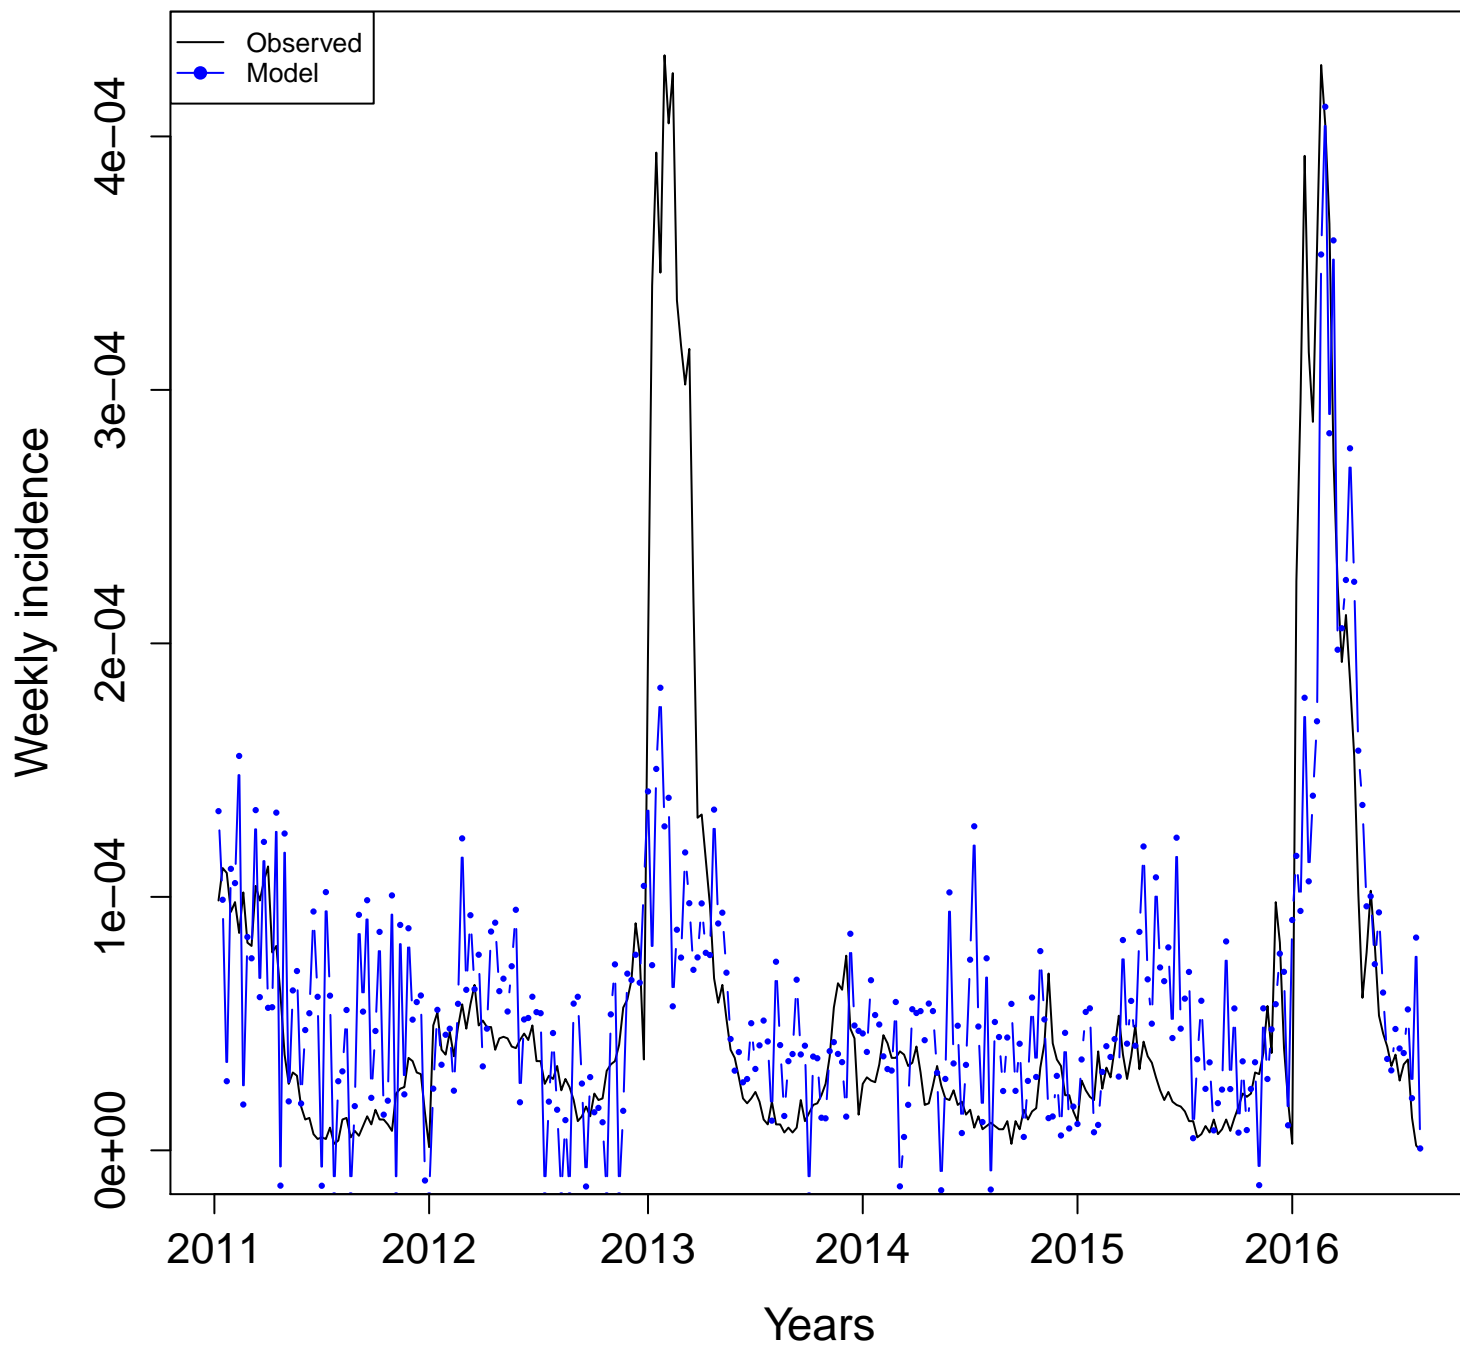



**Individual terms**  
**Adjusted R squared**

**Rôndonia (RO)**

**RO- aedes.aegypti**  
**Adj. R squared = 0.2445**

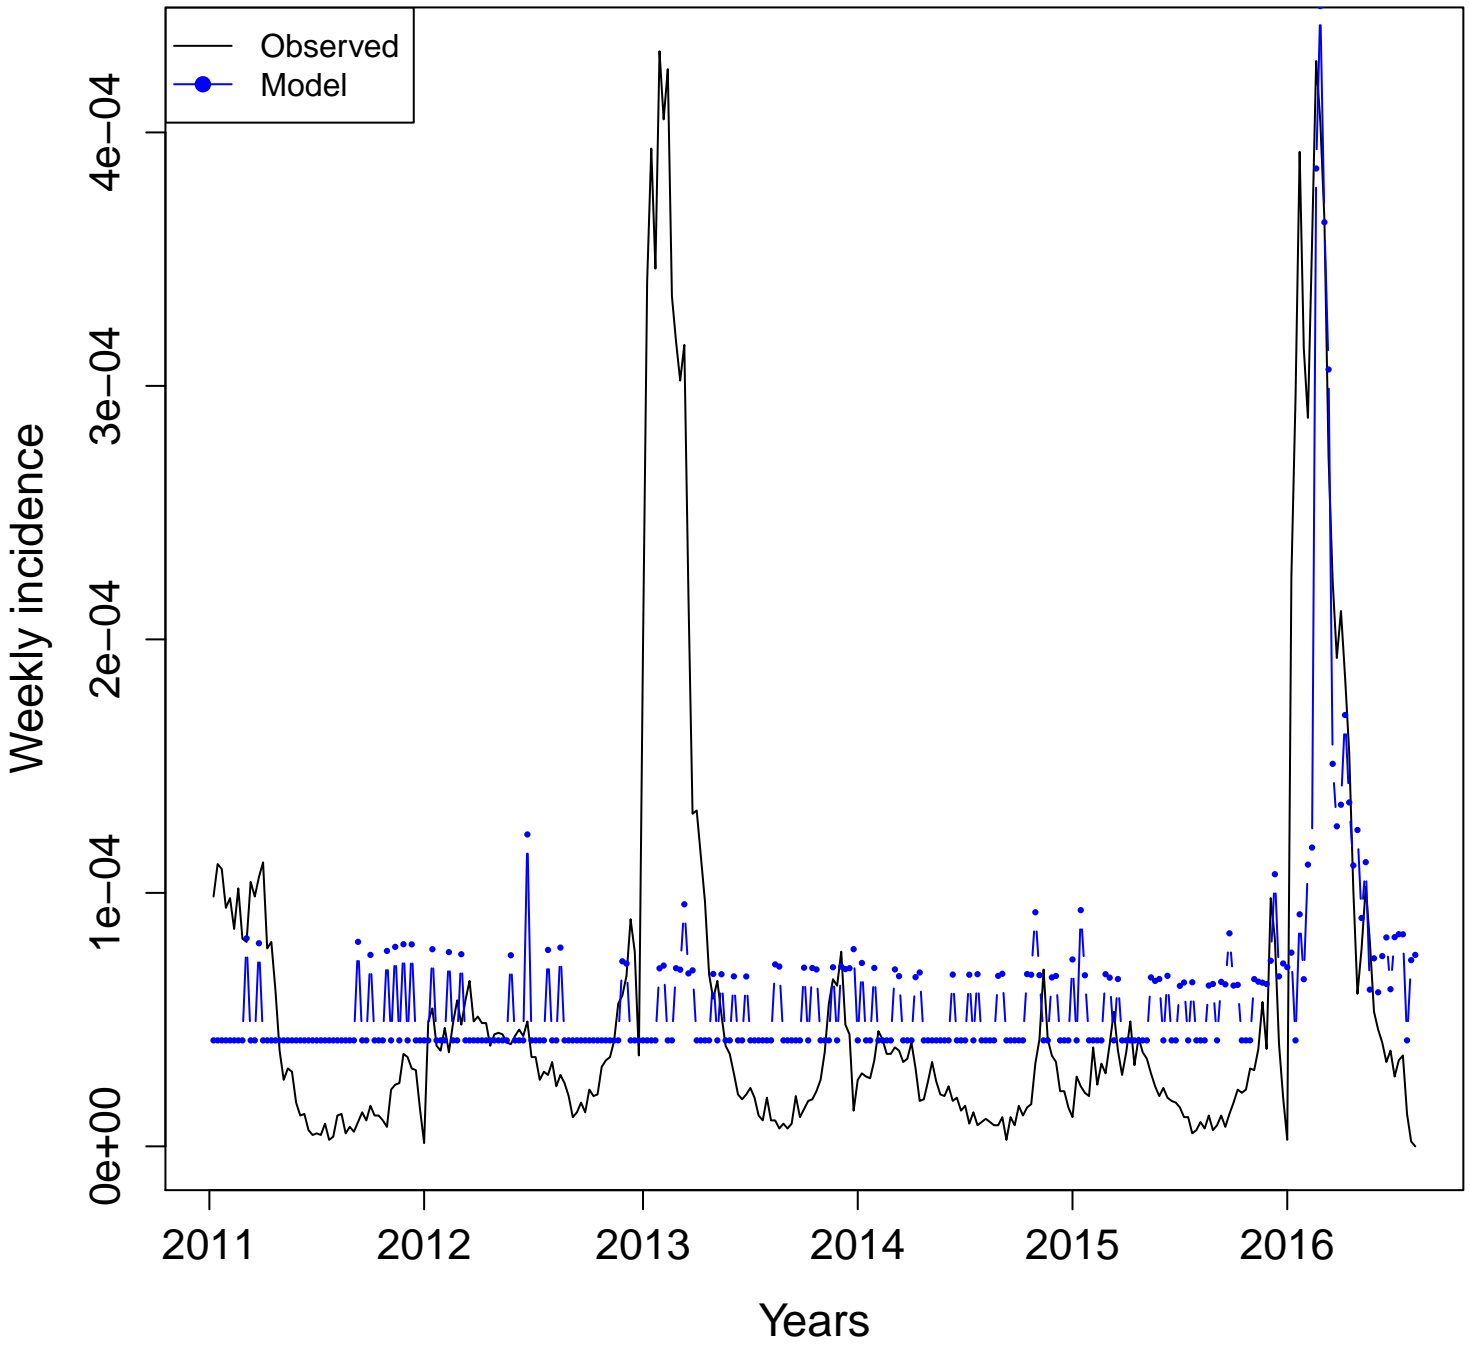

# RO- aedes

Adj. R squared = 0.211

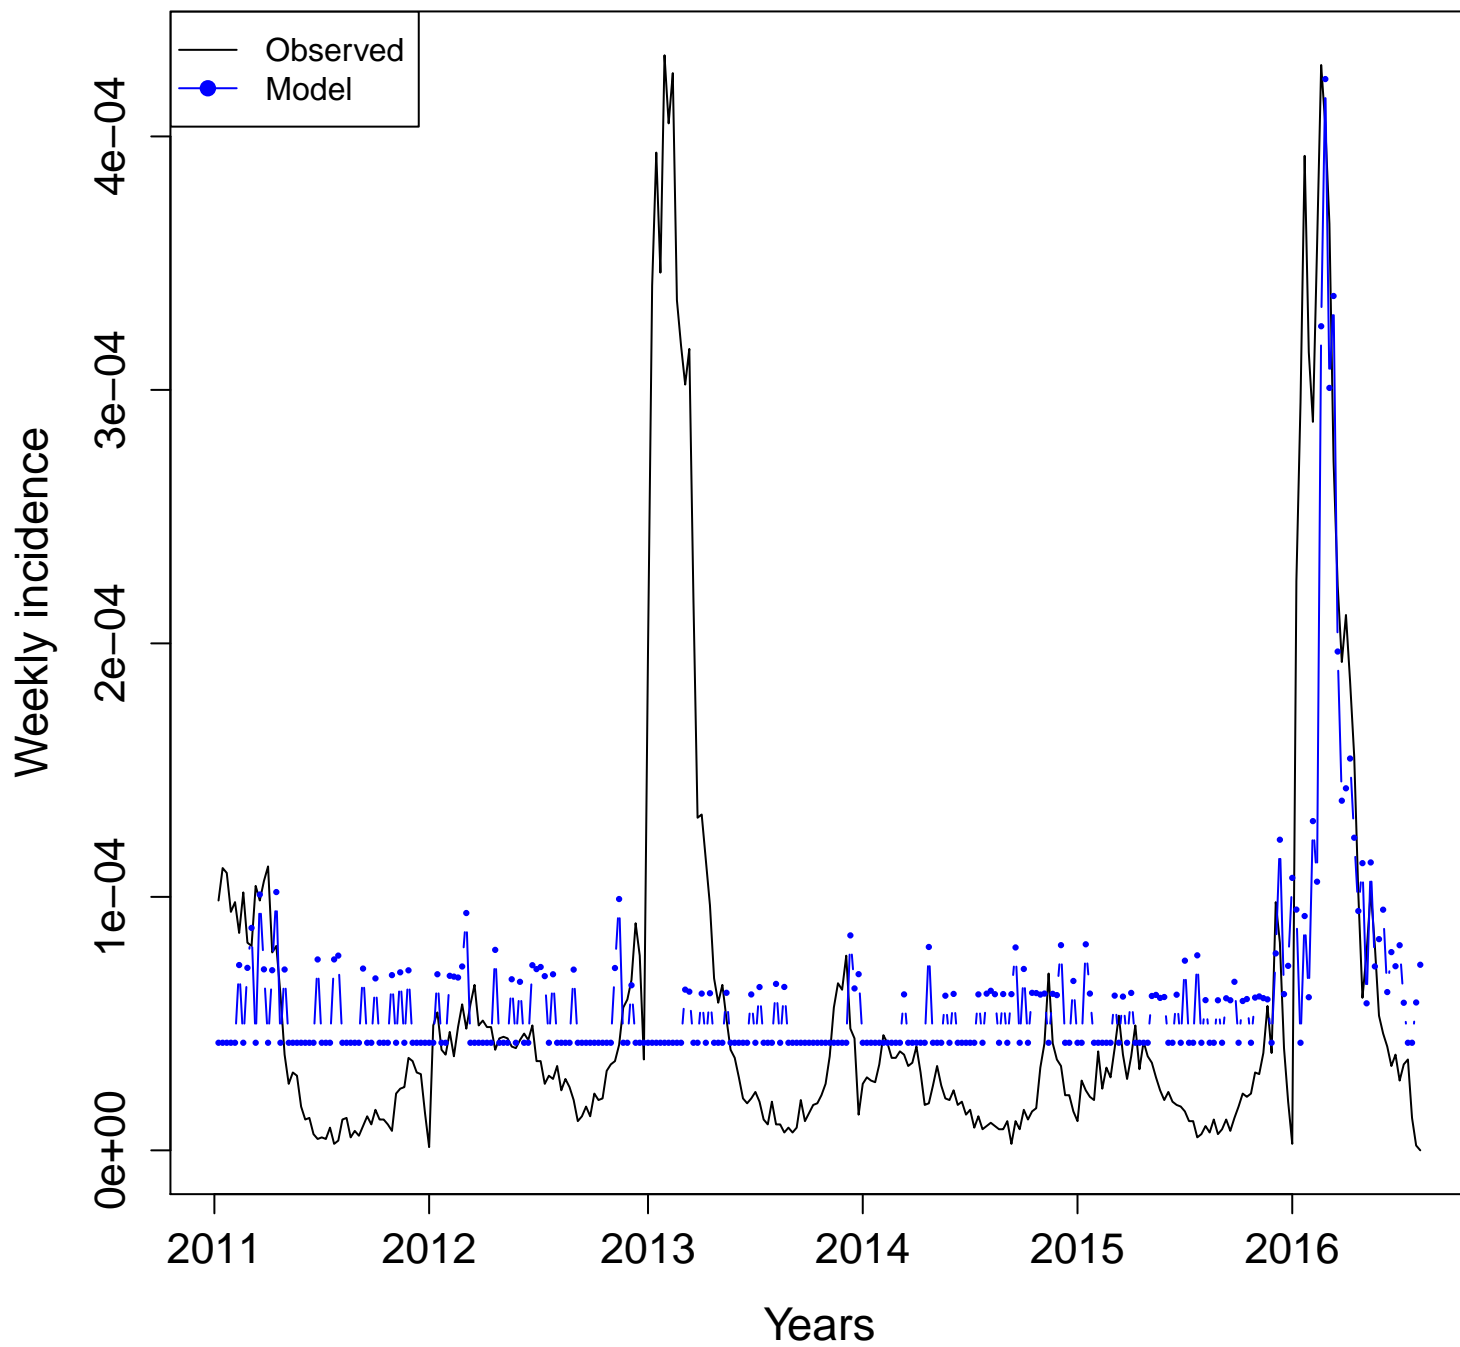

**RO- aegypti**  
**Adj. R squared = 0.2456**

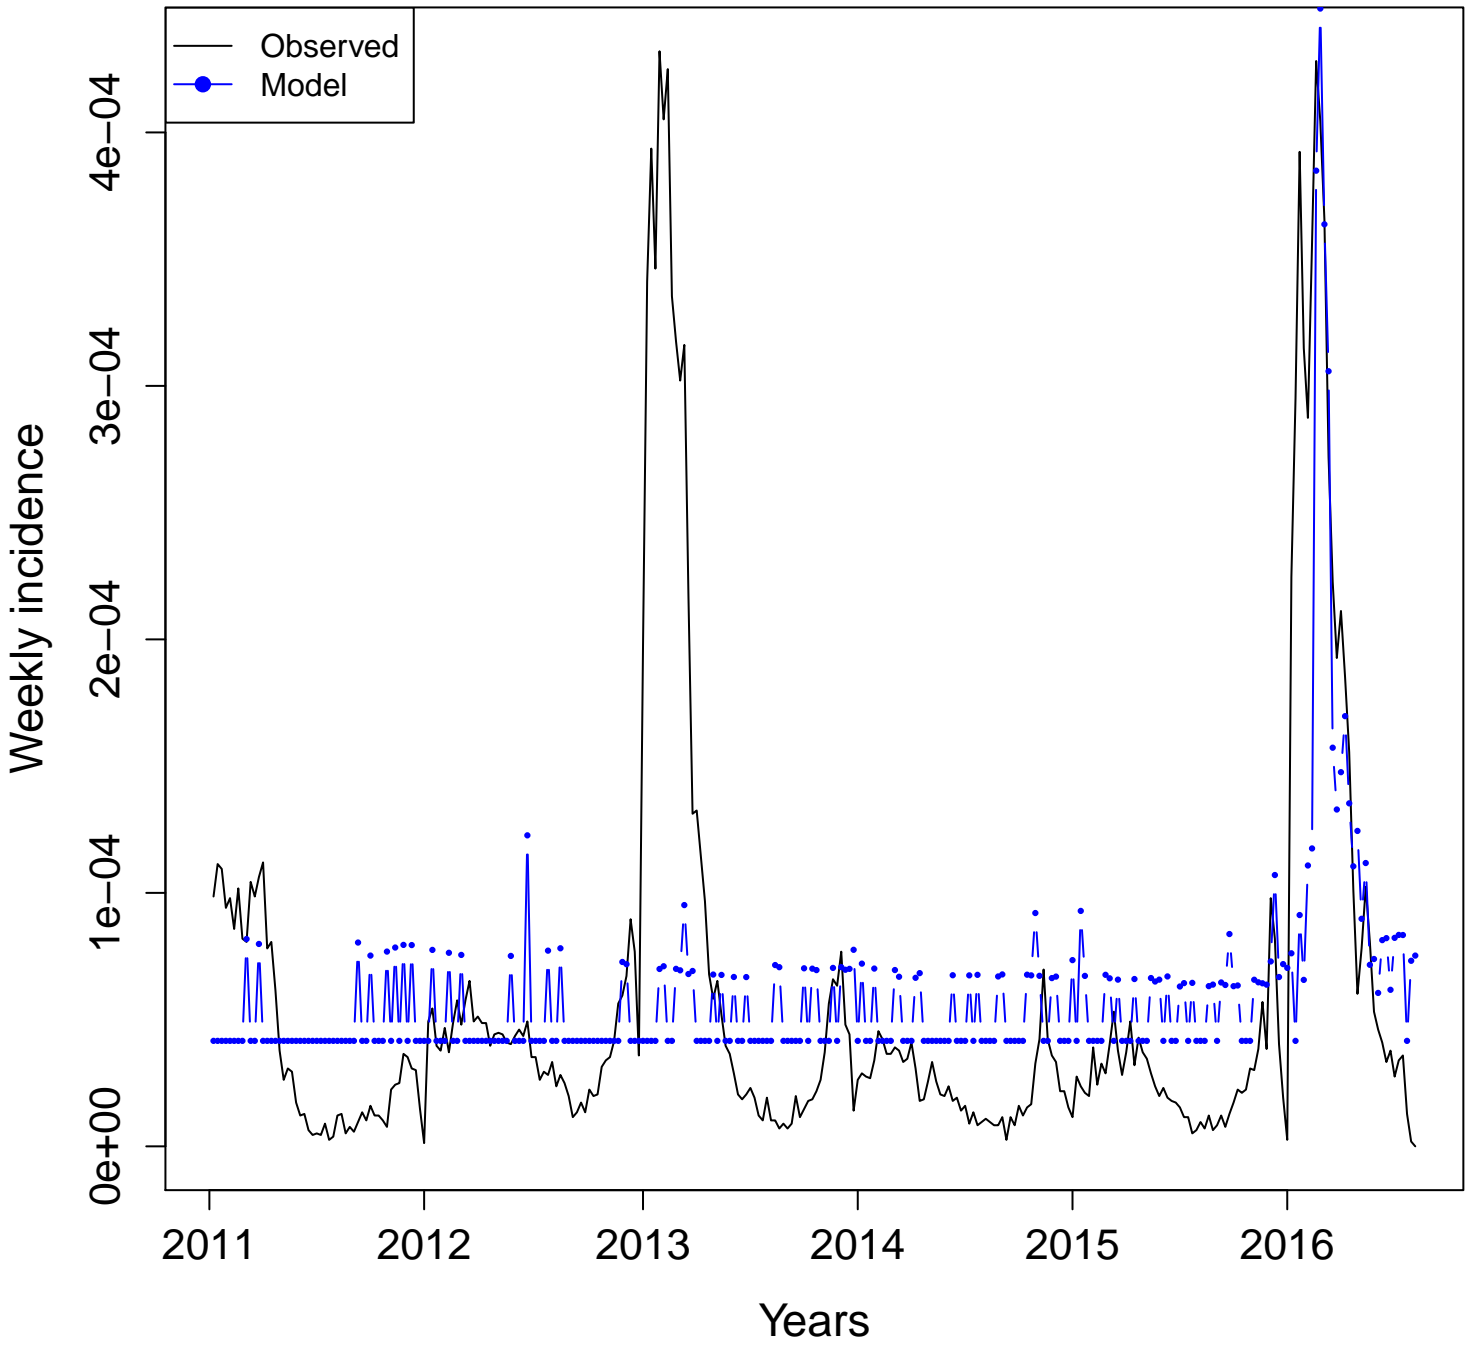

**RO- dengue**  
**Adj. R squared = 0.4793**

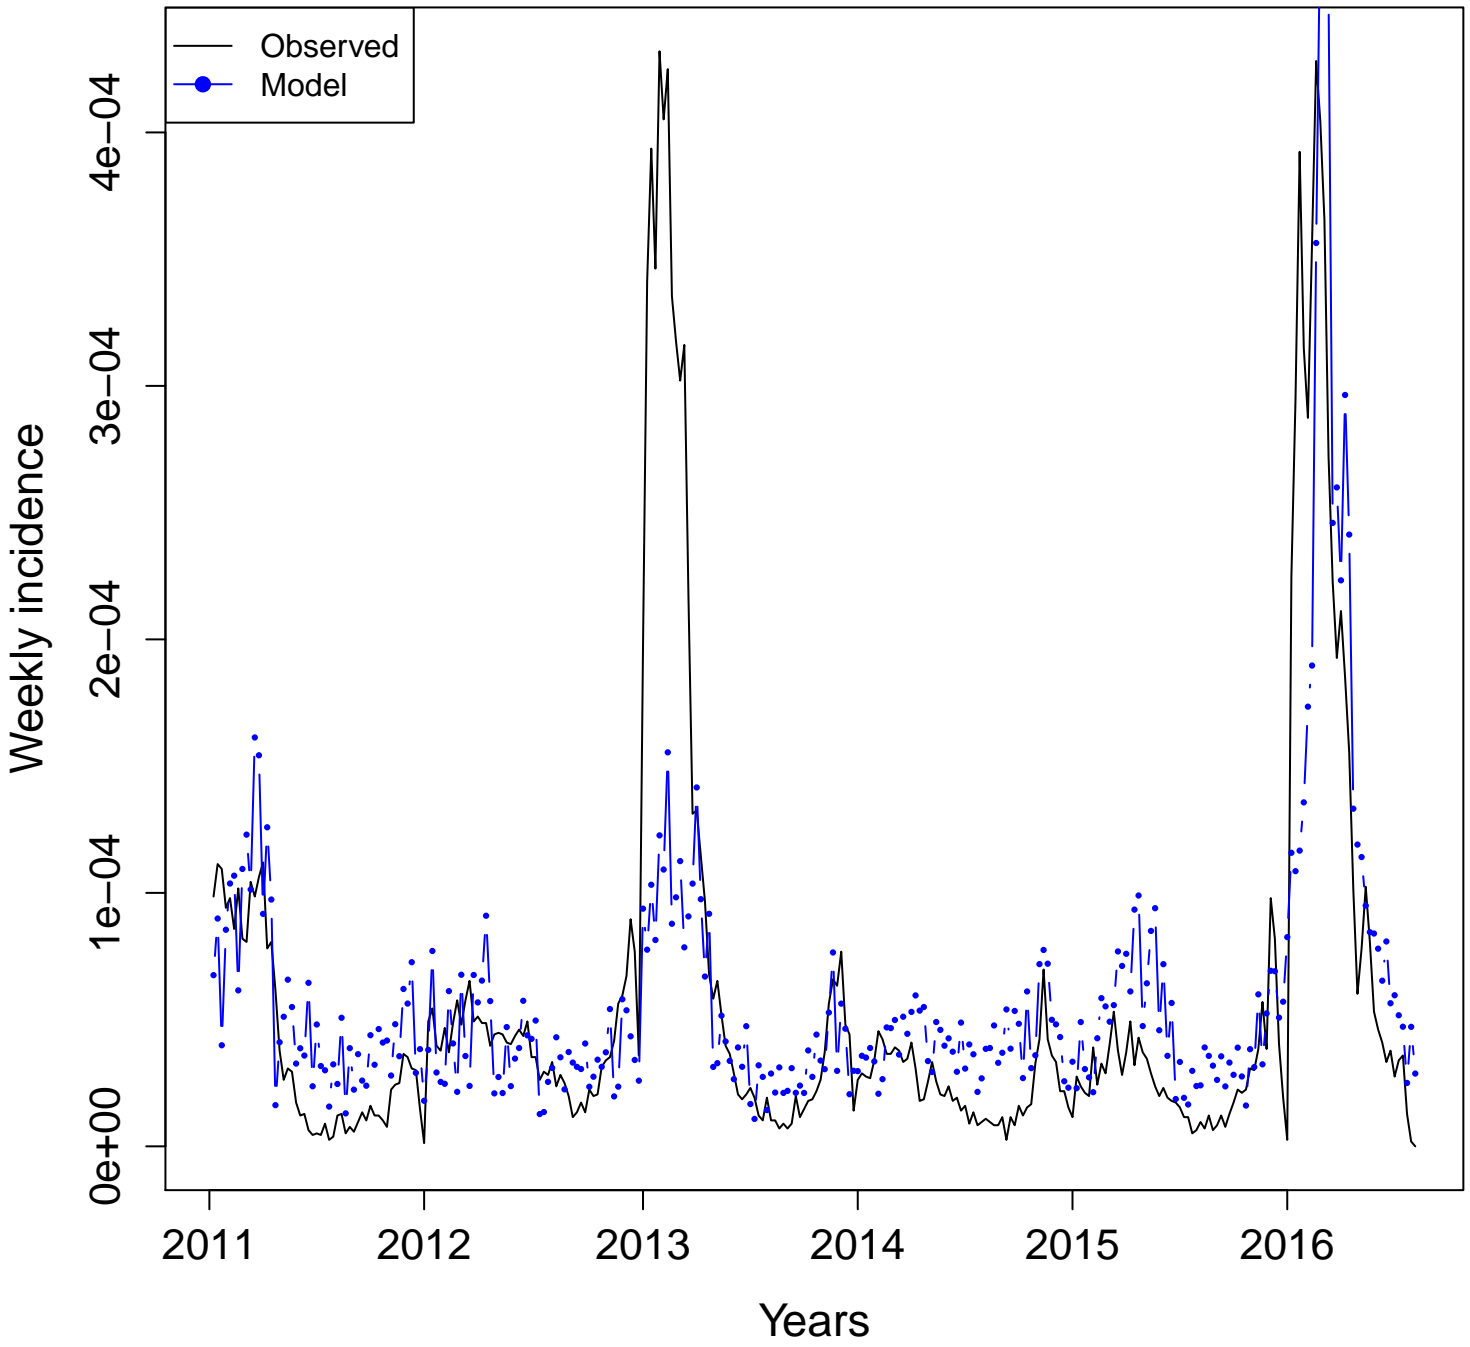

**RO- dengue.sintomas**  
**Adj. R squared = 0.3692**

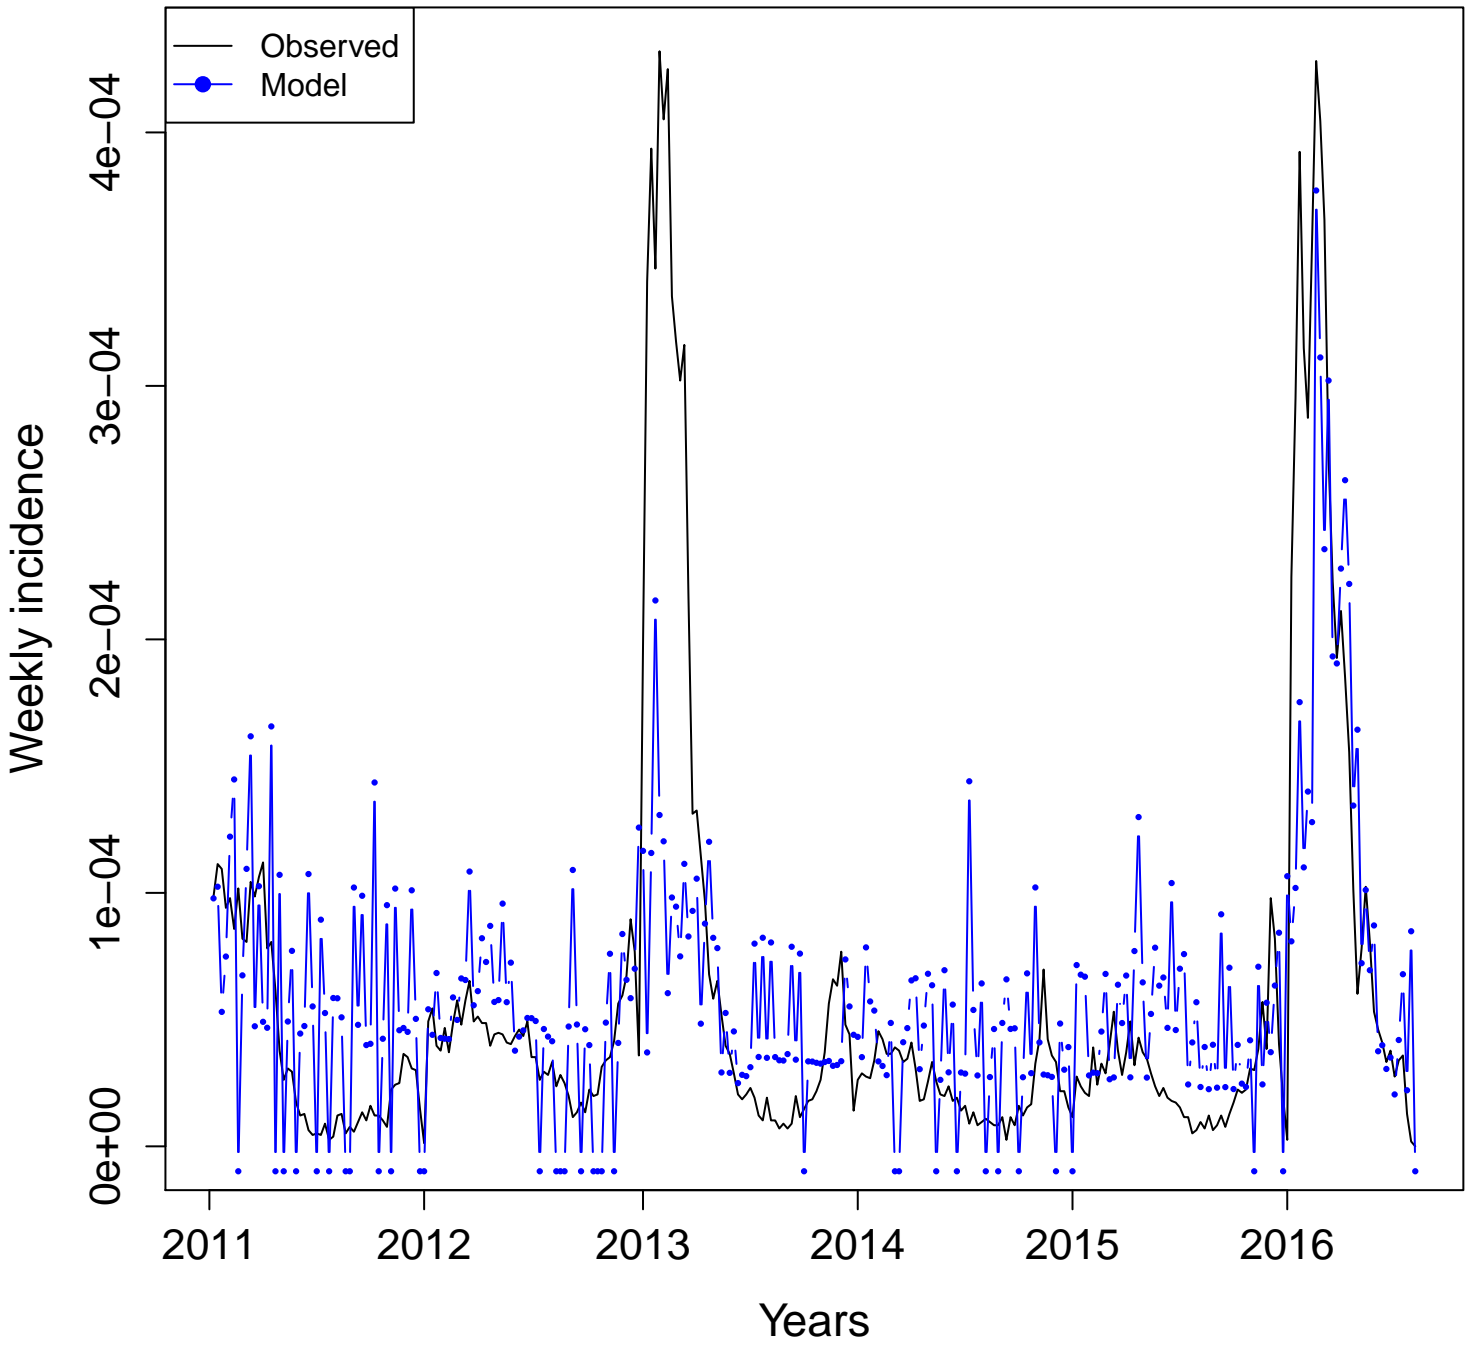

**RO- dengue.virus**  
**Adj. R squared = 0.1276**

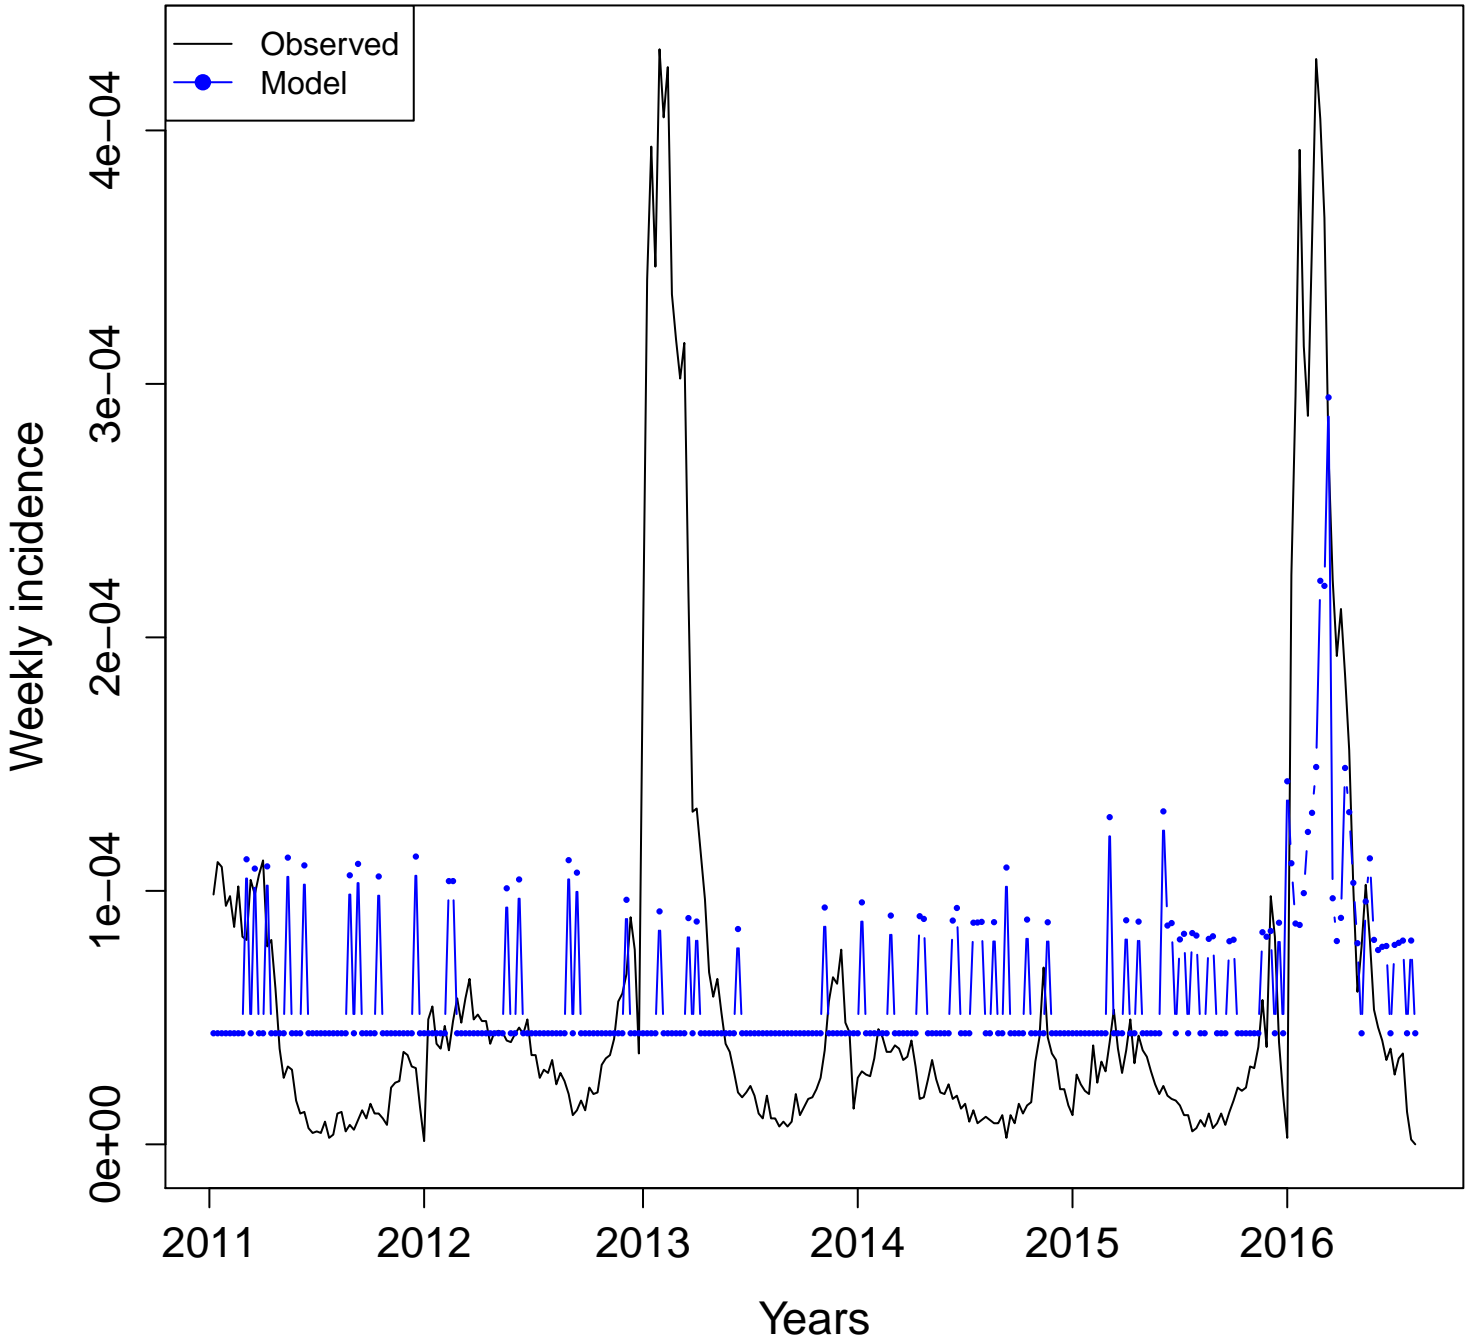

**RO- mosquito.dengue**  
**Adj. R squared = 0.1914**

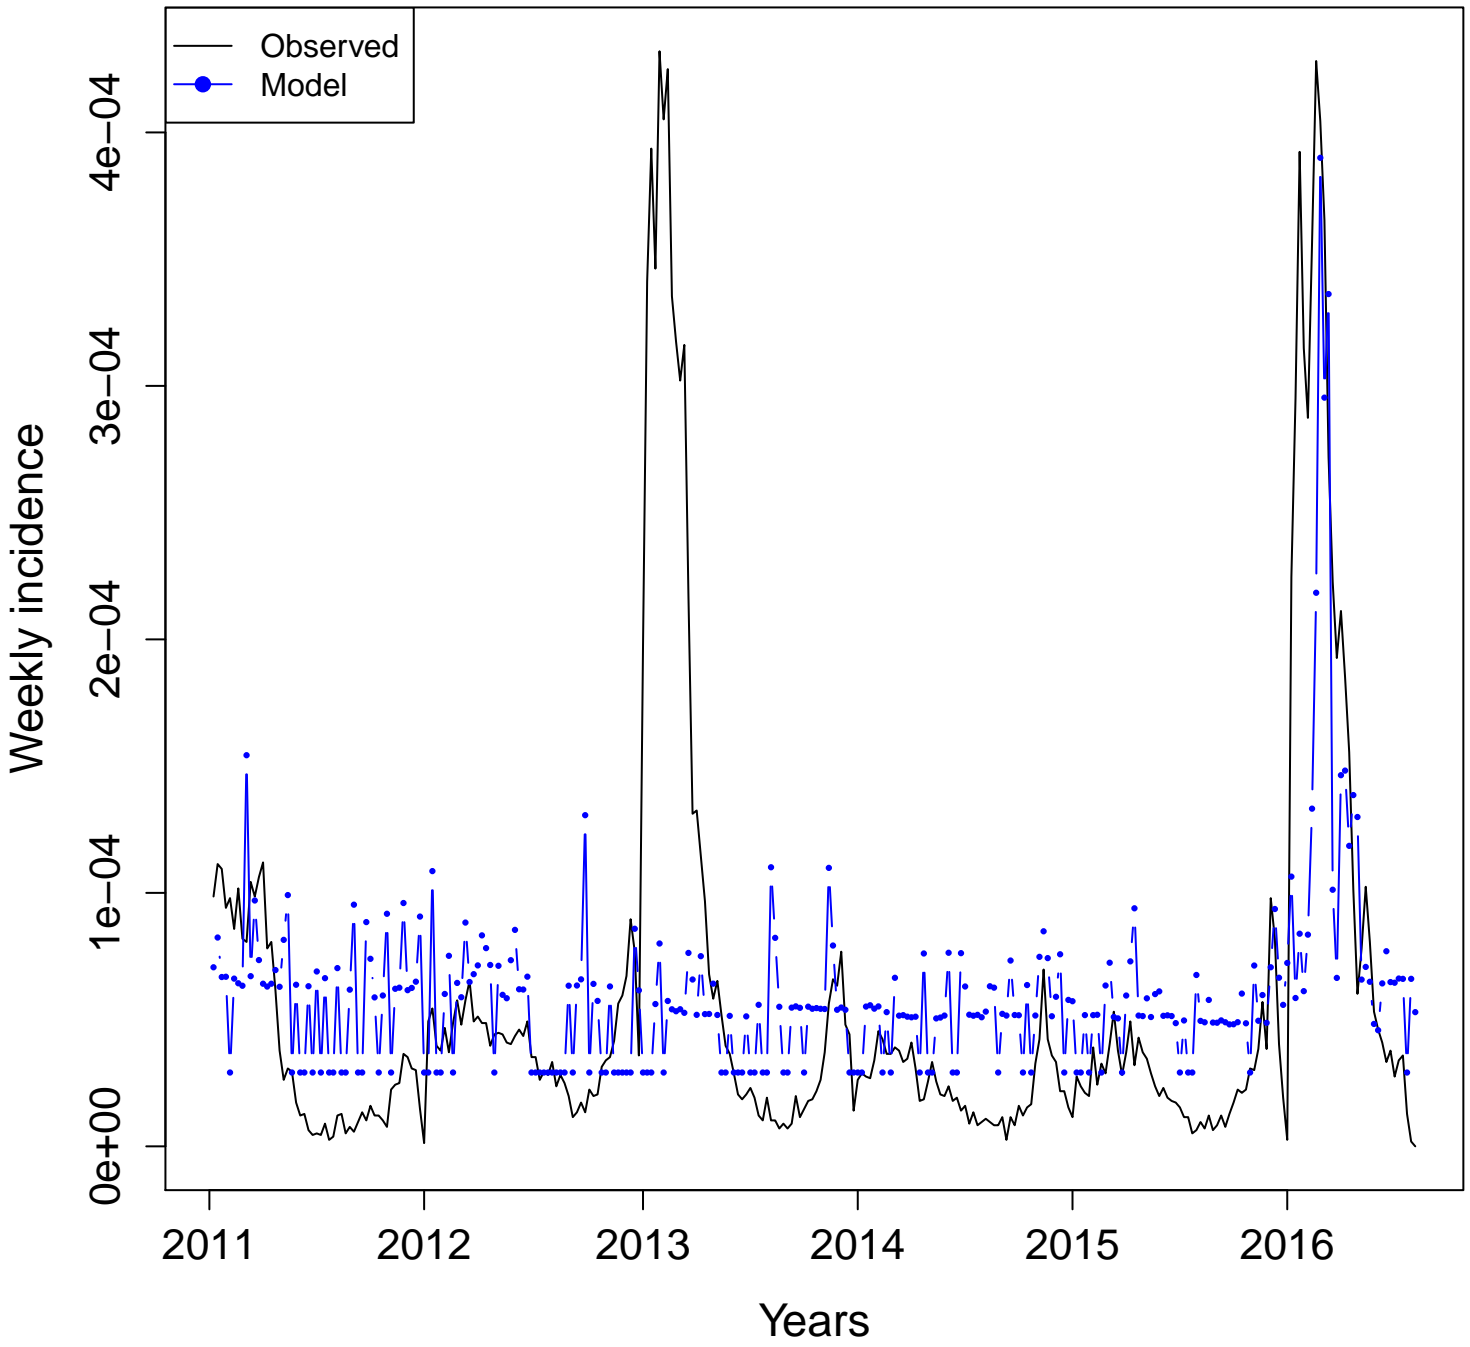



# RO- mosquito

Adj. R squared = 0.2692

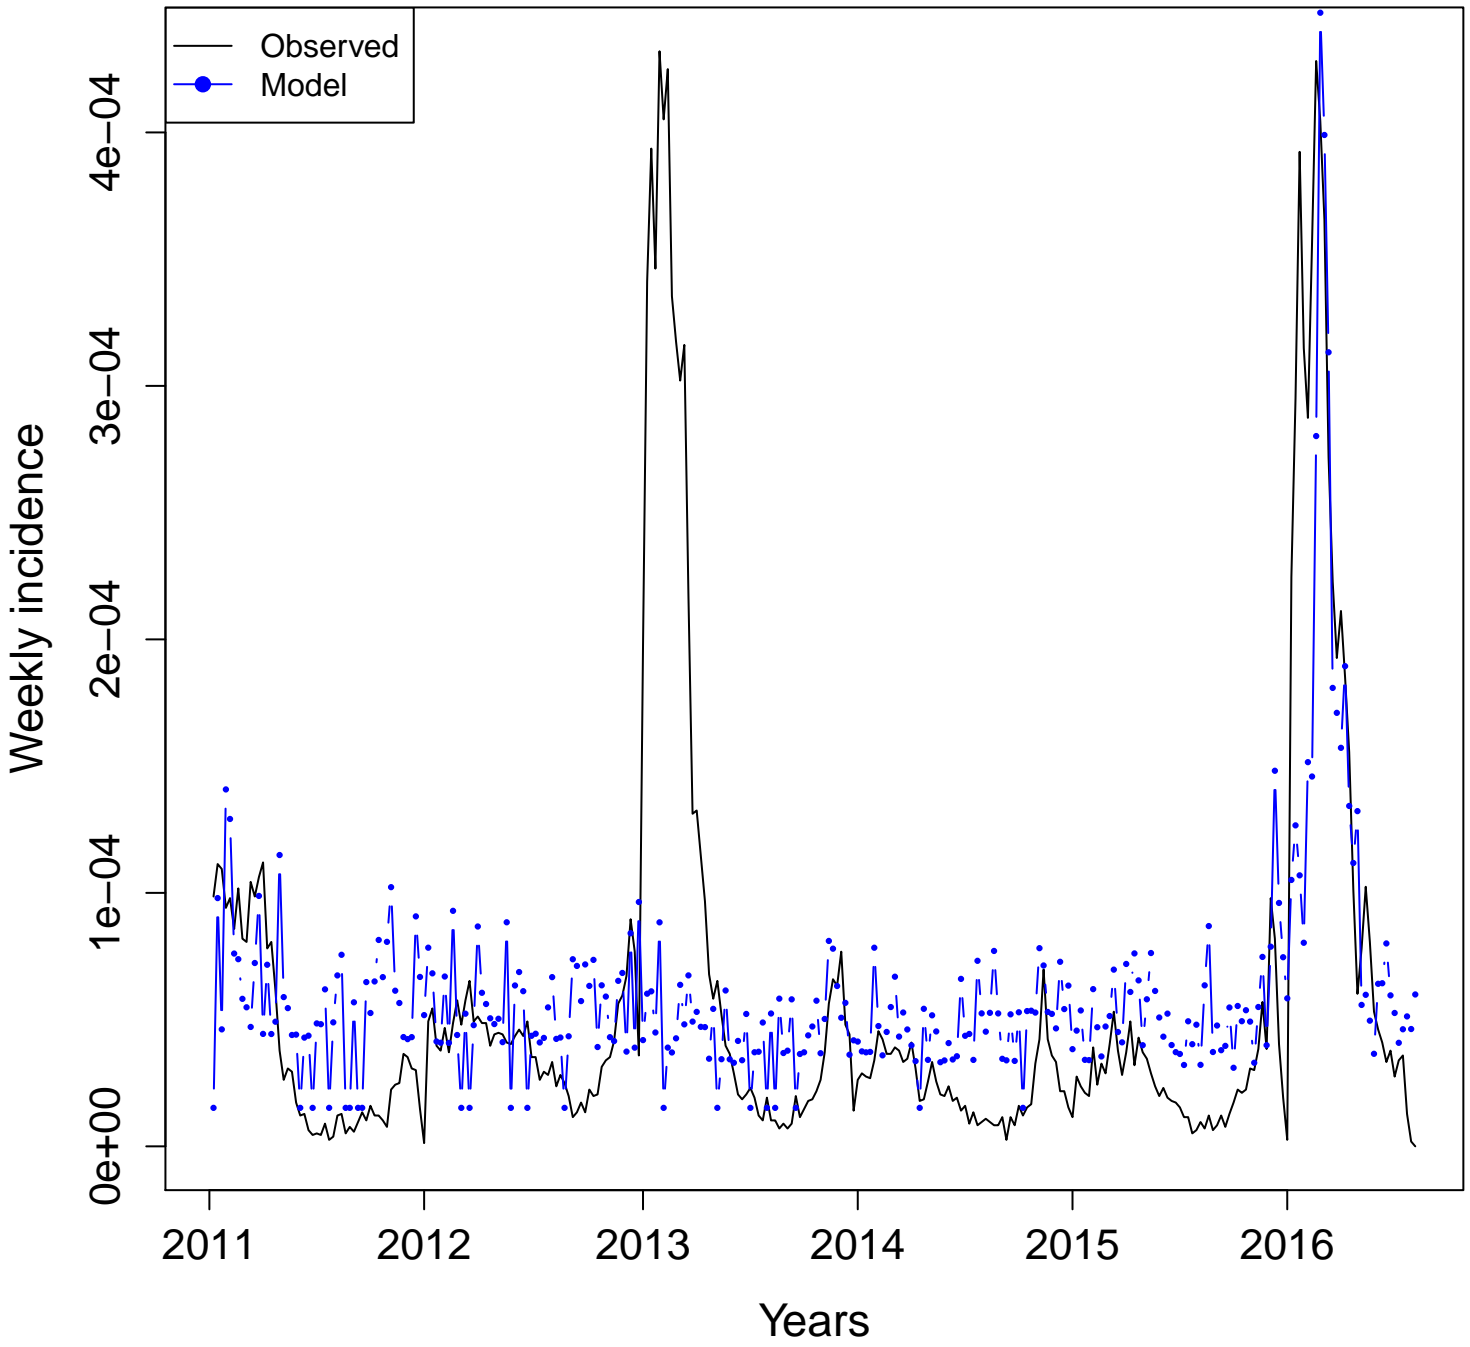

**RO- sintomas.da.dengue**  
**Adj. R squared = 0.3108**

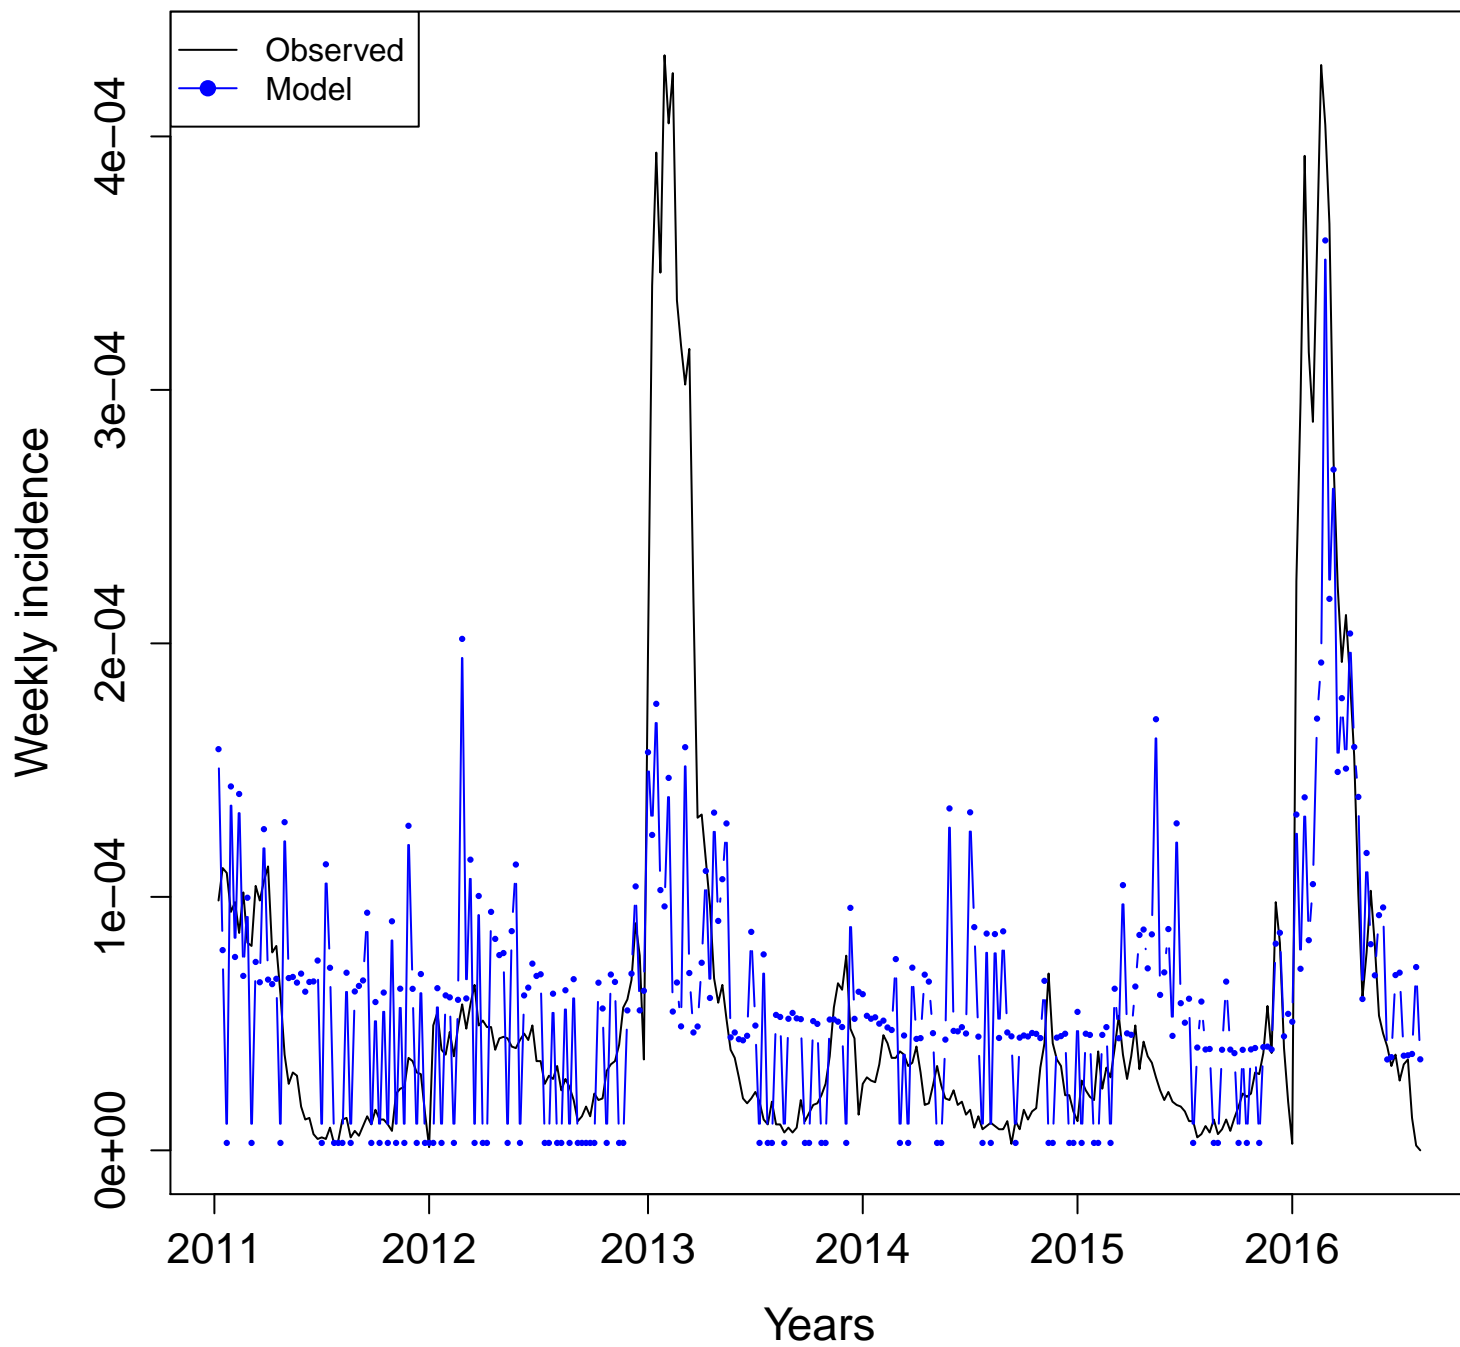

## Roraima (RR)

# Dengue incidence vs. Google Health Trends (2011–2016)

### Definitions:

- **Combined terms:**
  - **All:** model with all the available terms.  $n$  = number of terms
  - **Four:** model with "dengue", "dengue sintomas", "aedes", and "mosquito".
  - **Uncorrelated:** model with non-correlated terms.  $n$  = number of uncorrelated terms
- **Individual terms:** Plots developed with one term at a time.
- Terms for all and uncorrelated models can be found in additional file 3.

**Combined terms**  
**Adjusted R squared**

**Roraima (RR)**

All  
(n = 7)

BR-RR  
Adj. R squared = 0.0933

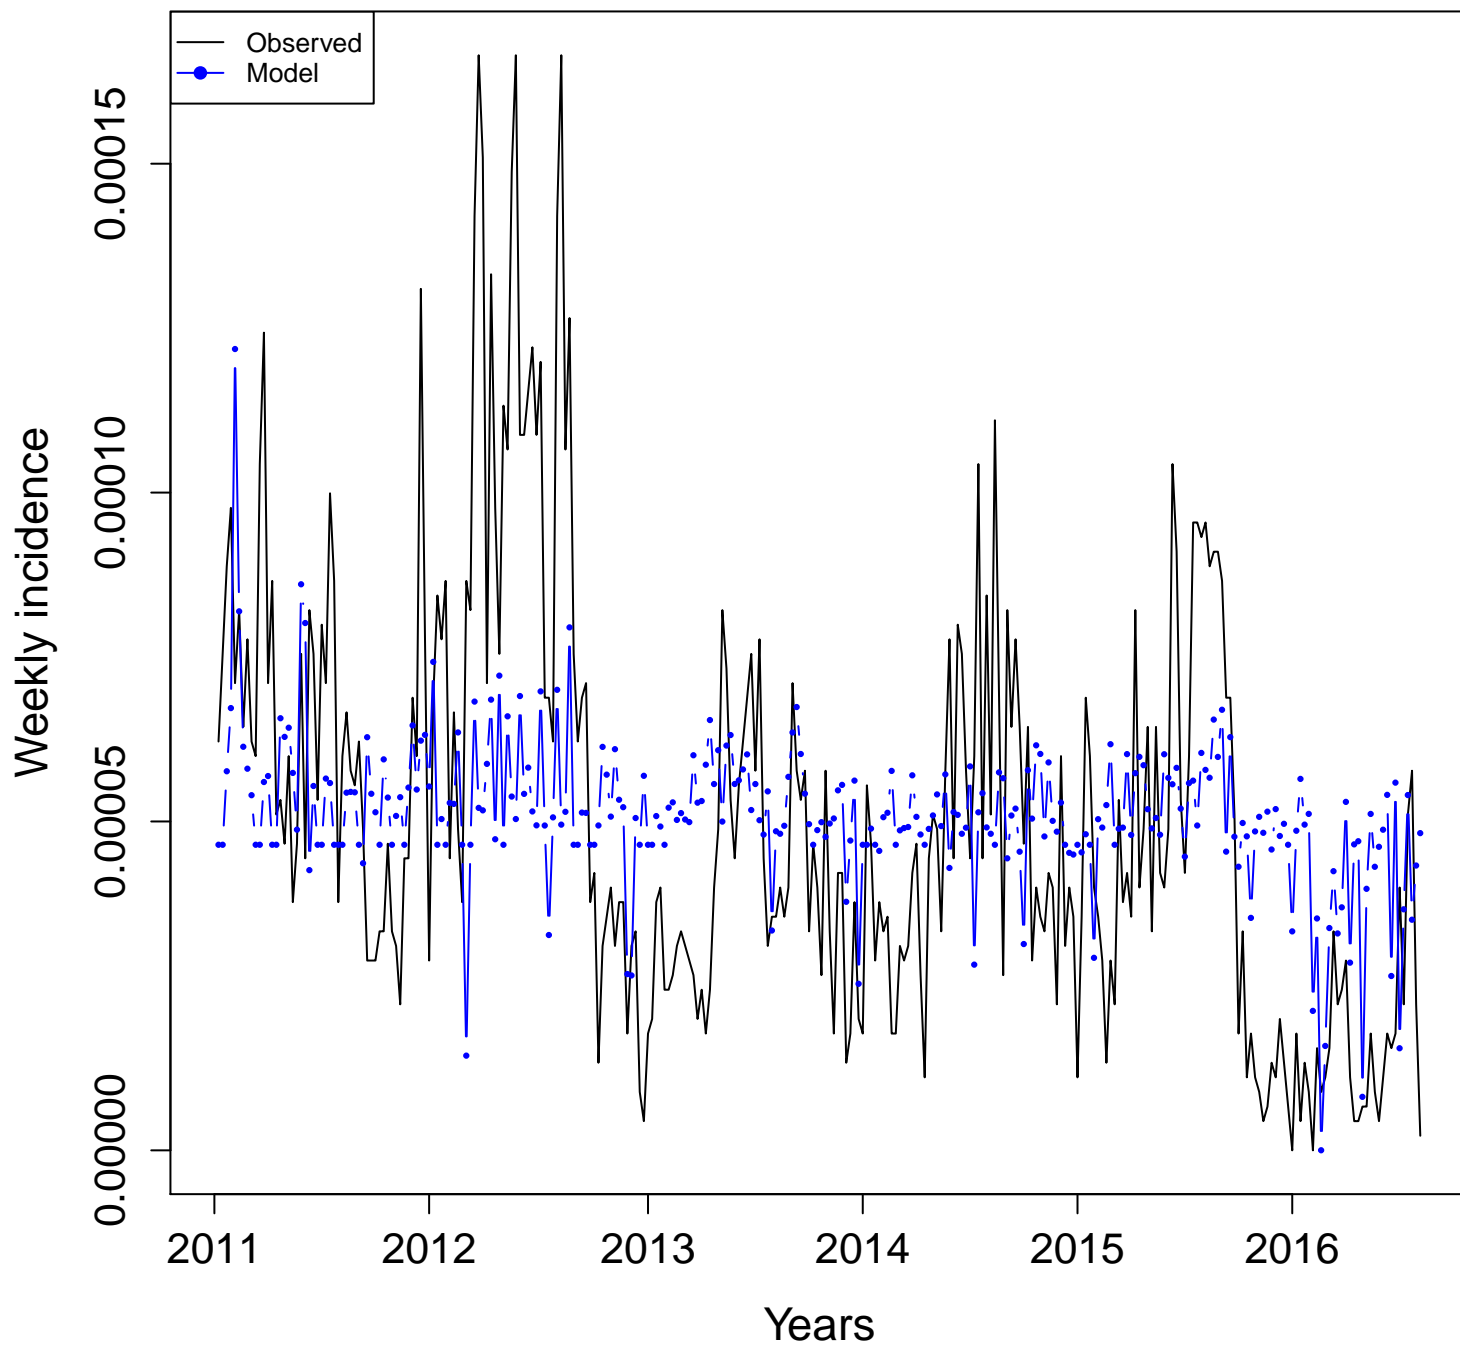

**BR-RR**  
**Adj. R squared = 0.0575**

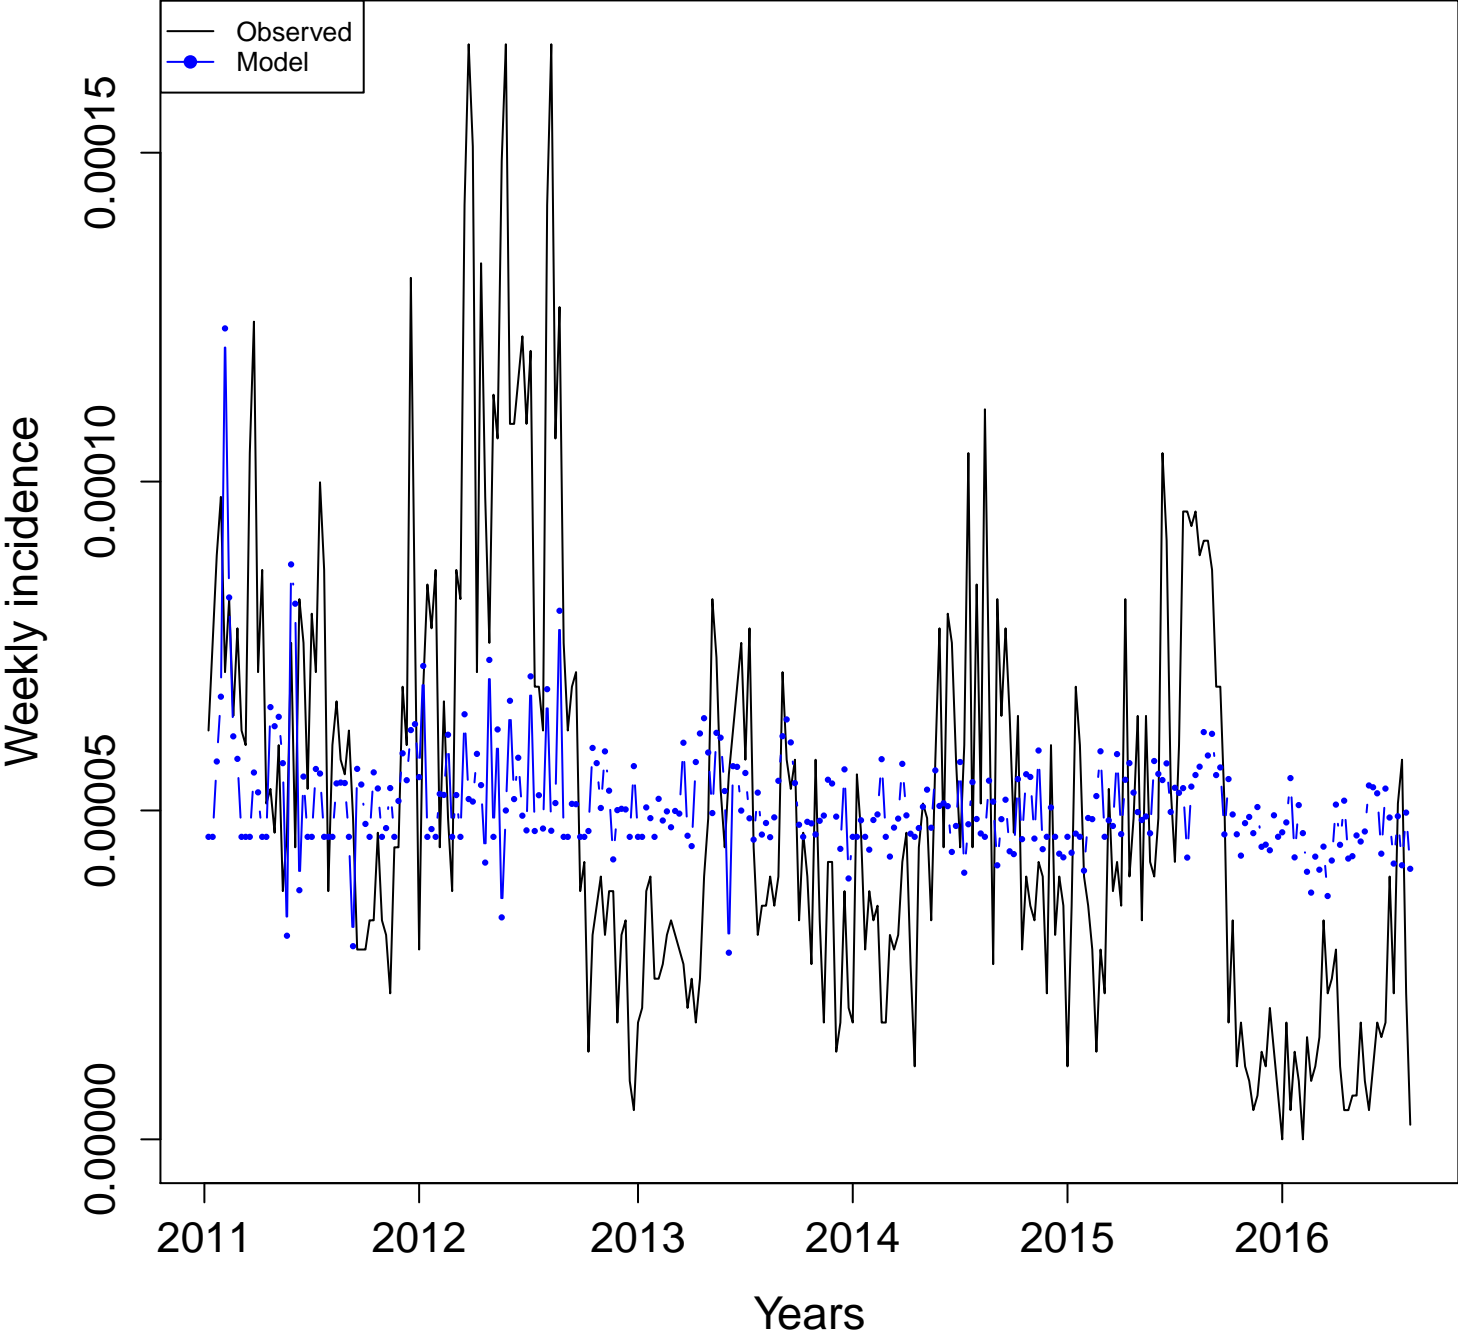

**Uncorrelated  
(n = 6)**

**BR-RR  
Adj. R squared = 0.0905**

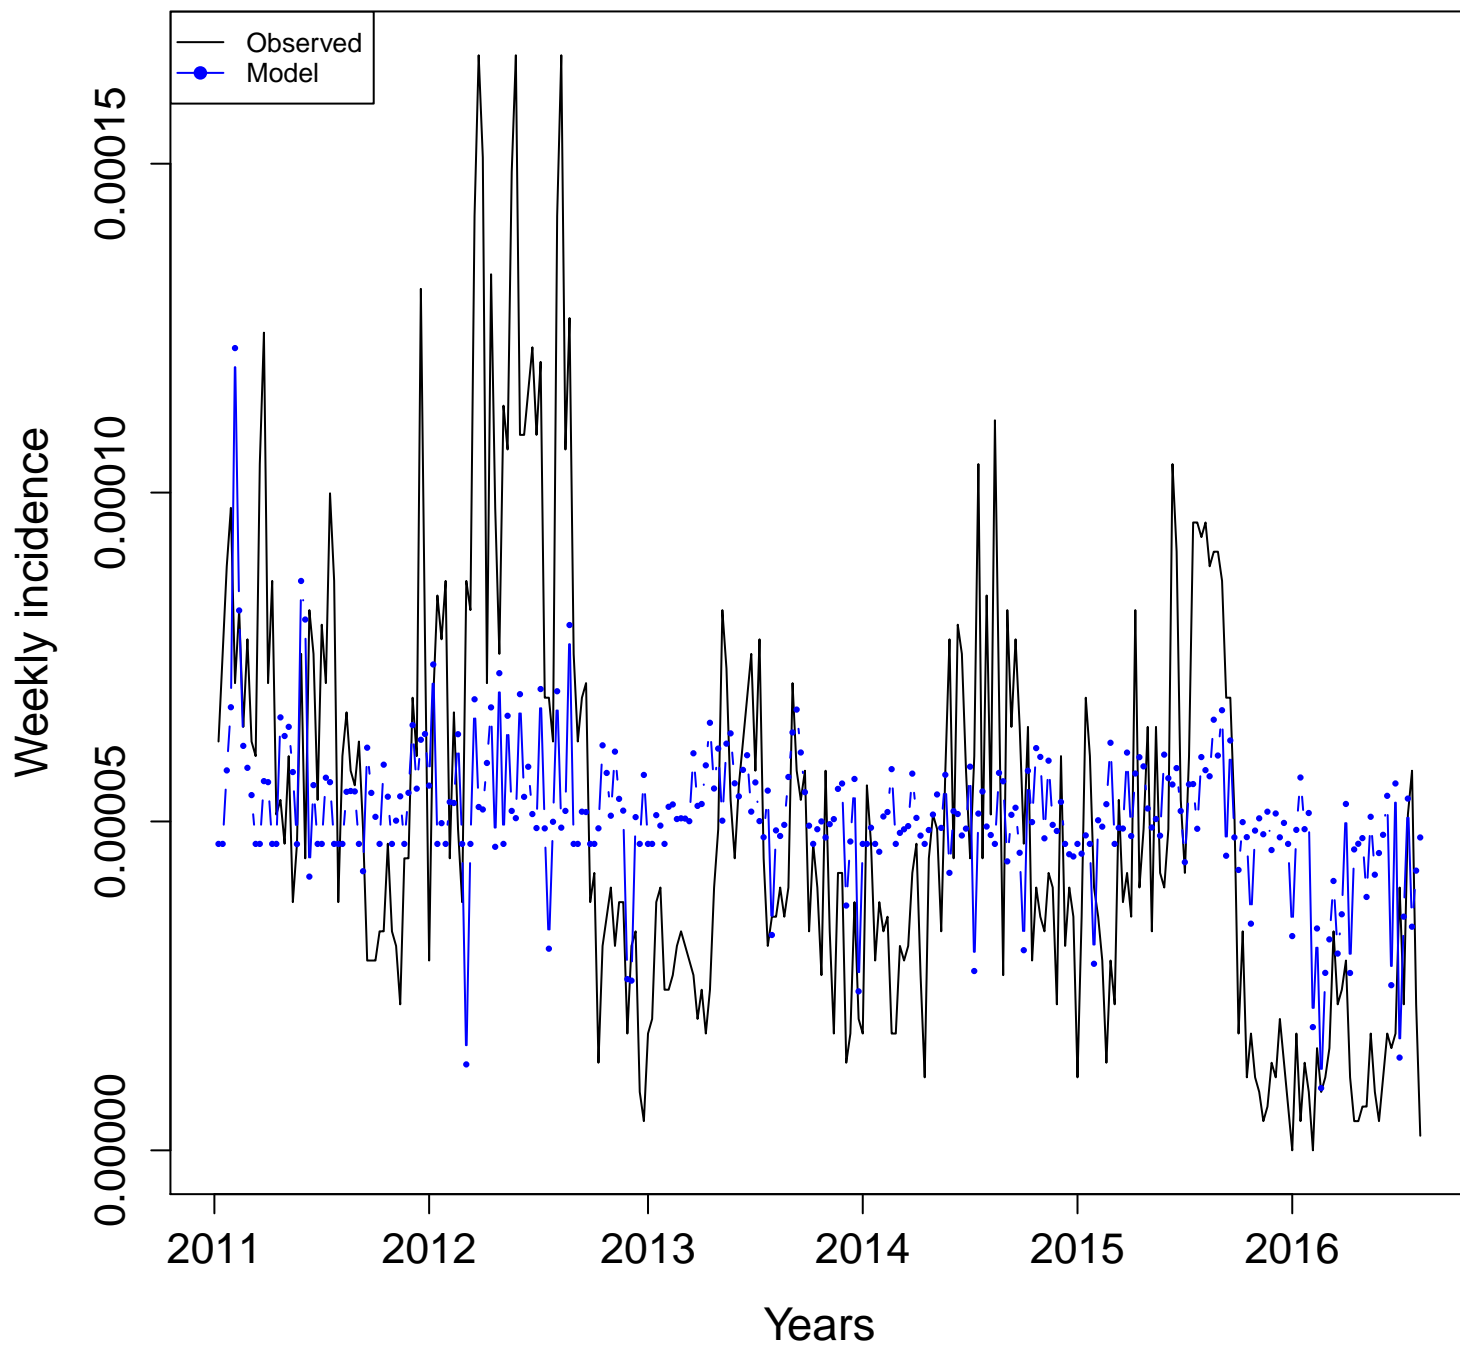

**Individual terms**  
**Adjusted R squared**

**Roraima (RR)**



**RR- aedes.aegypti**  
**Adj. R squared = 0.0465**

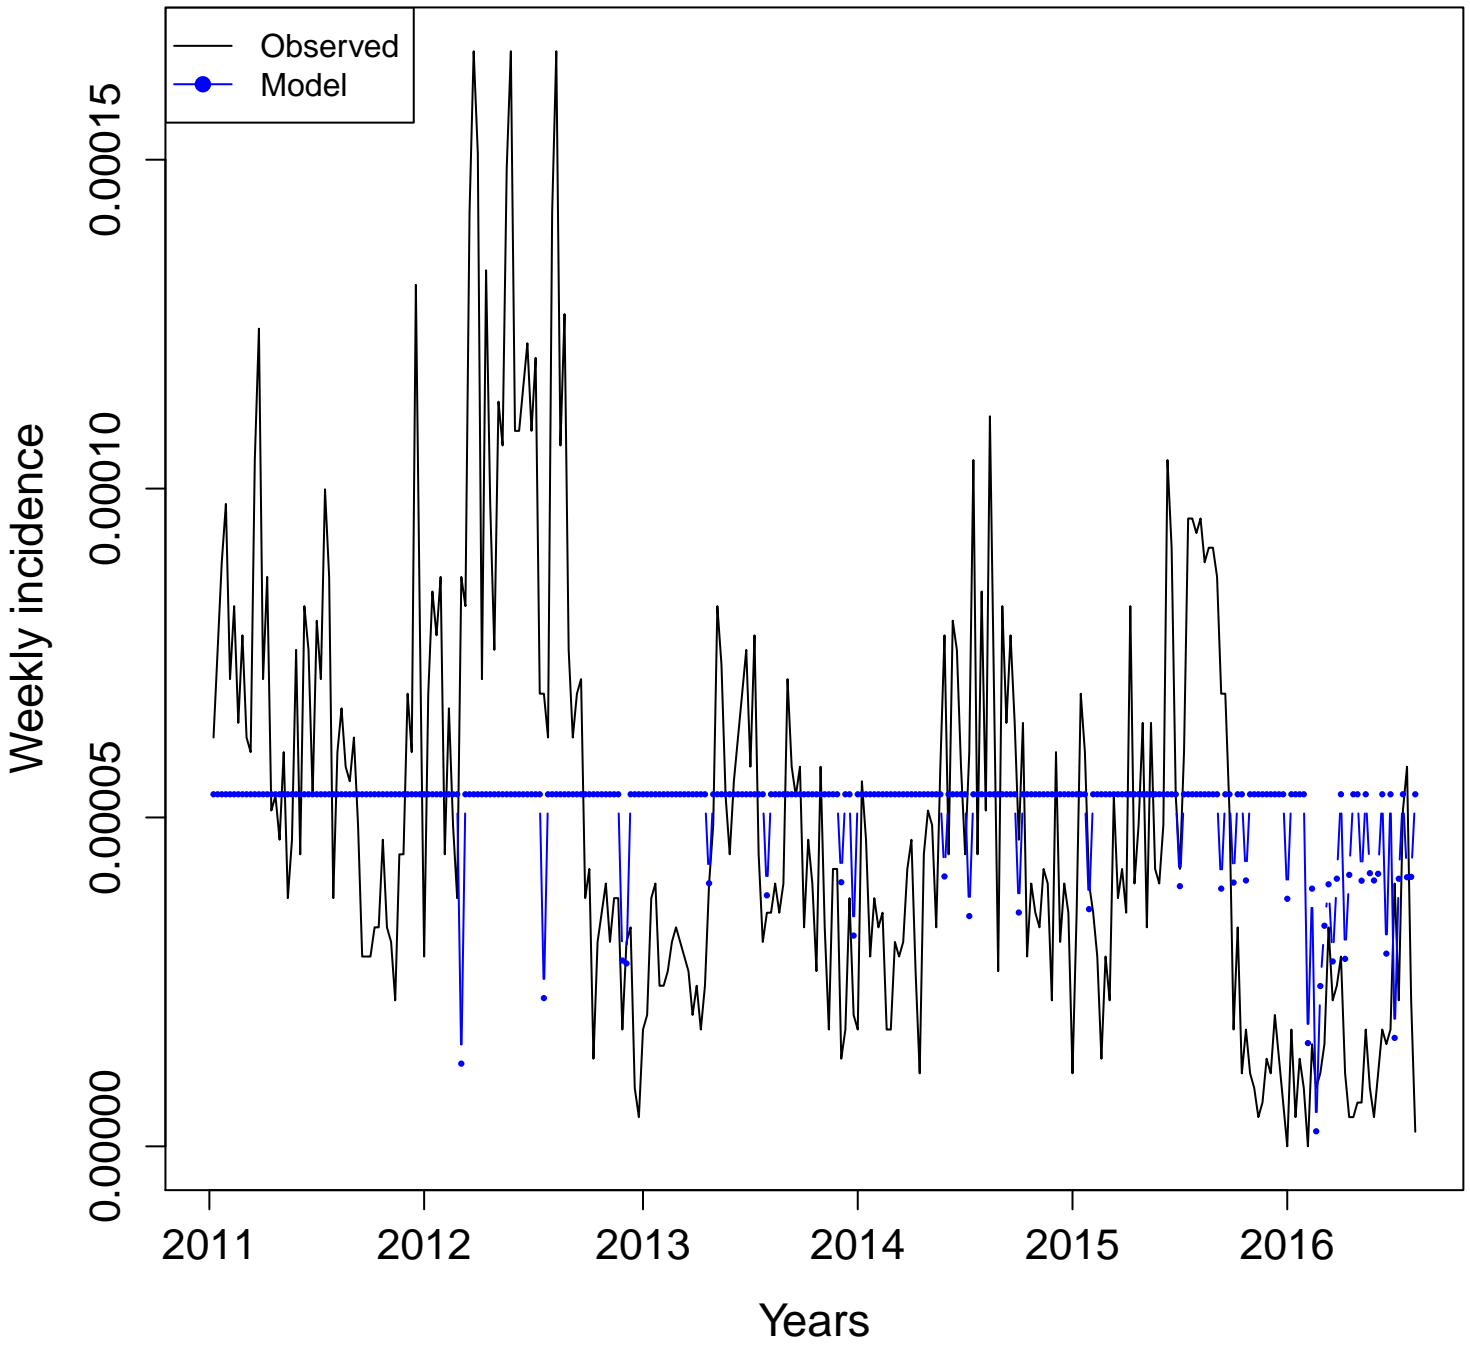

**RR- aedes**  
**Adj. R squared = 0.0068**

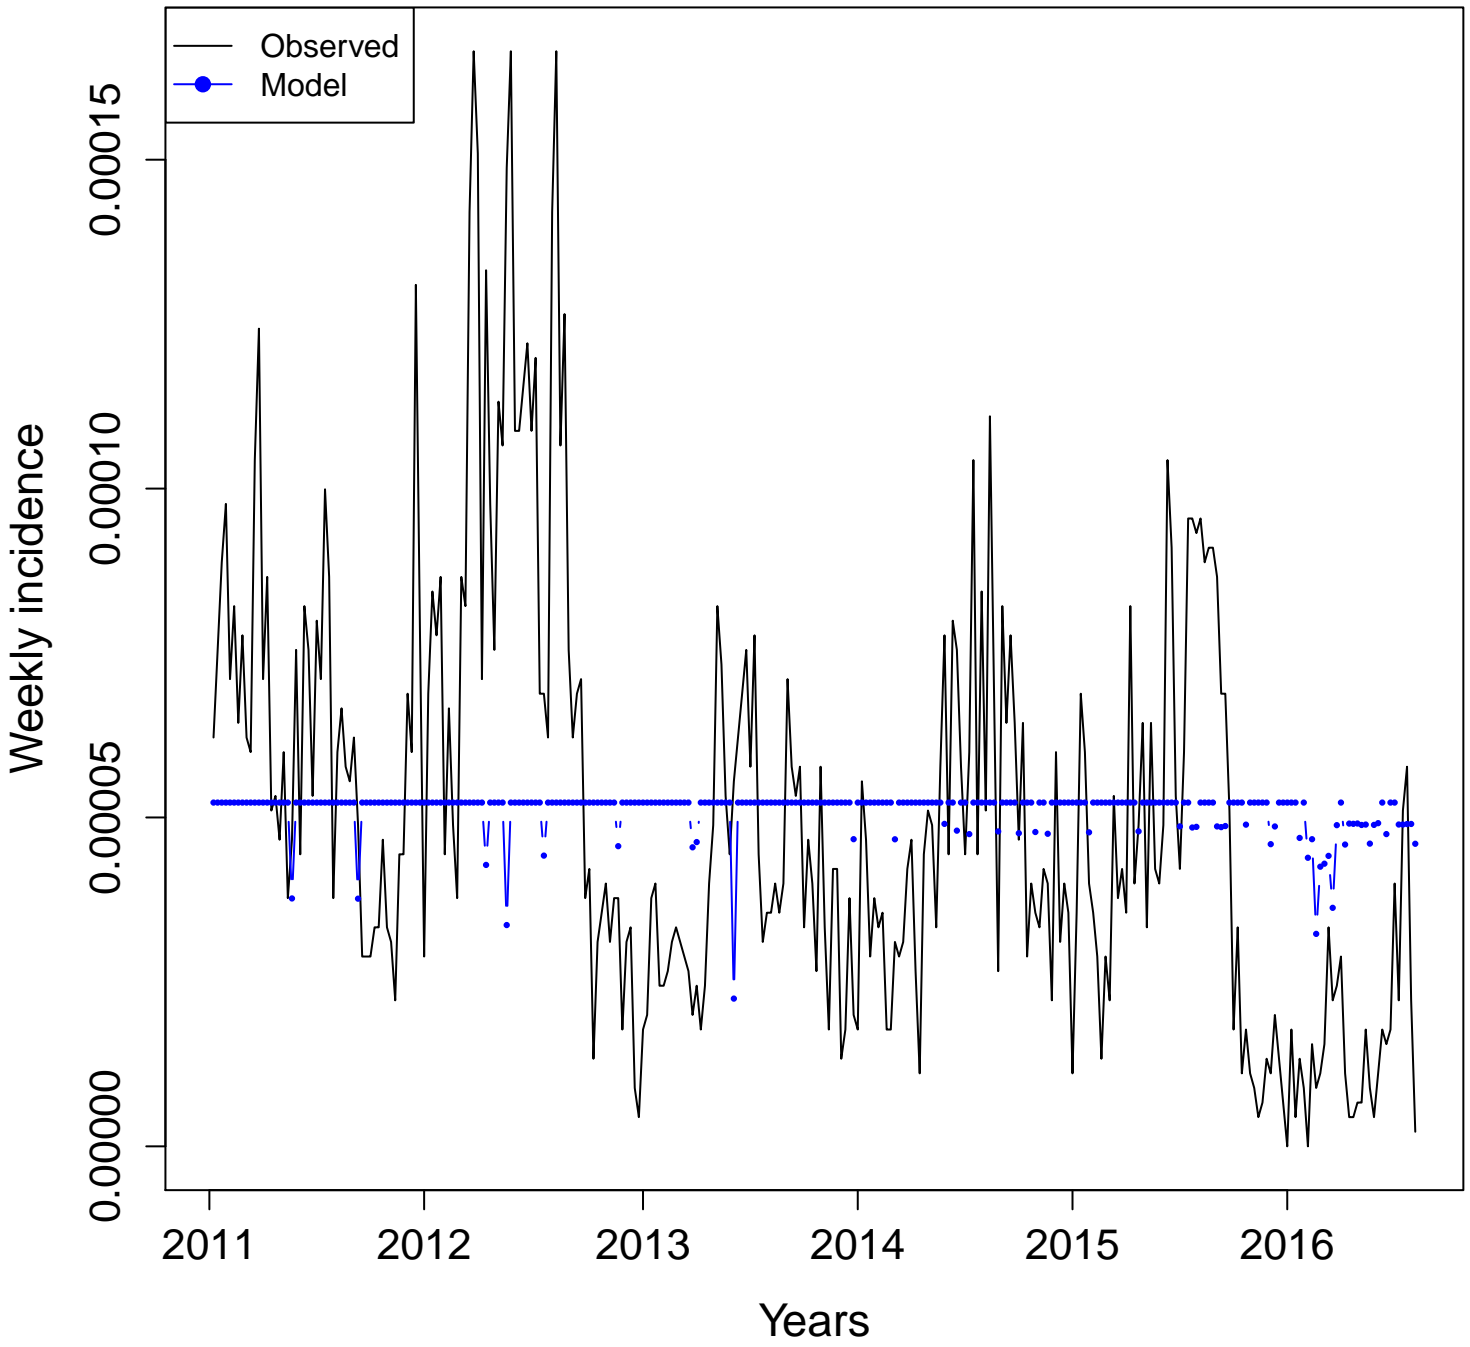

**RR- aegypti**  
**Adj. R squared = 0.0497**

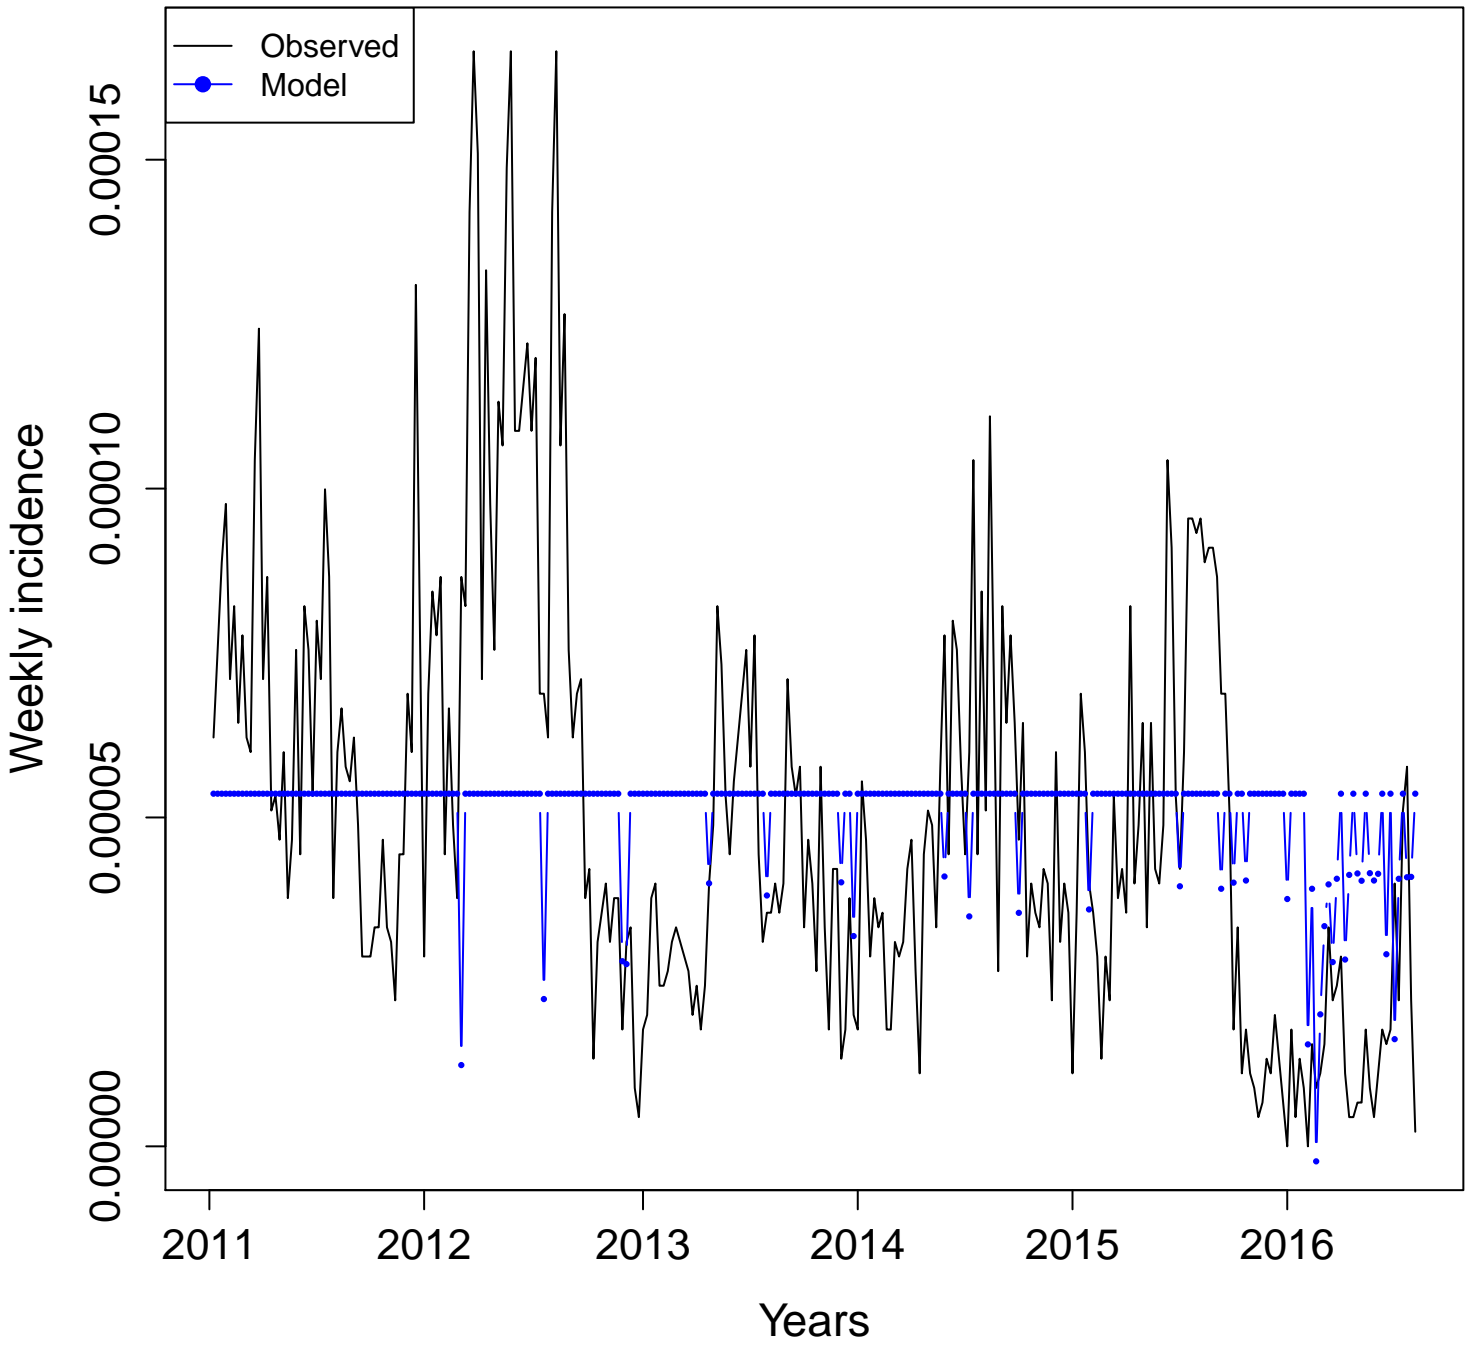

**RR- dengue**  
**Adj. R squared = 0.0318**

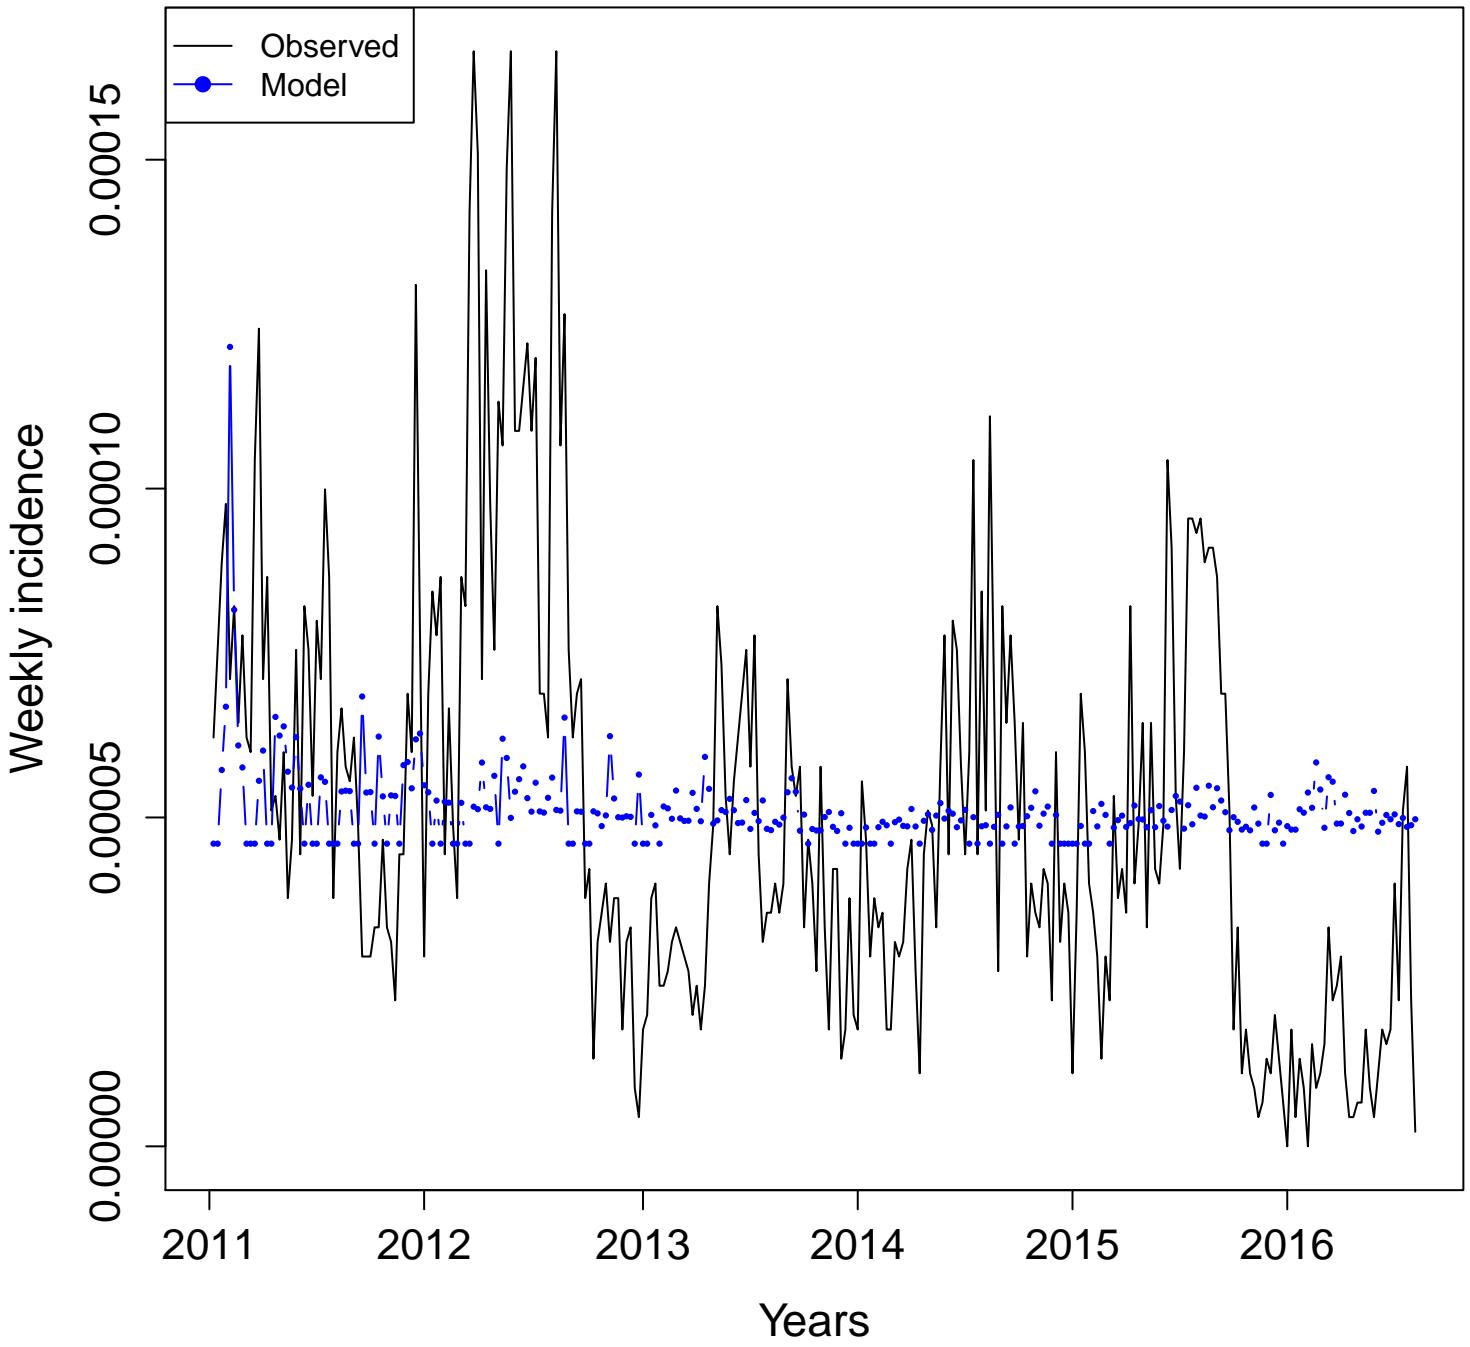

**RR- dengue.sintomas**  
**Adj. R squared = 0.0155**

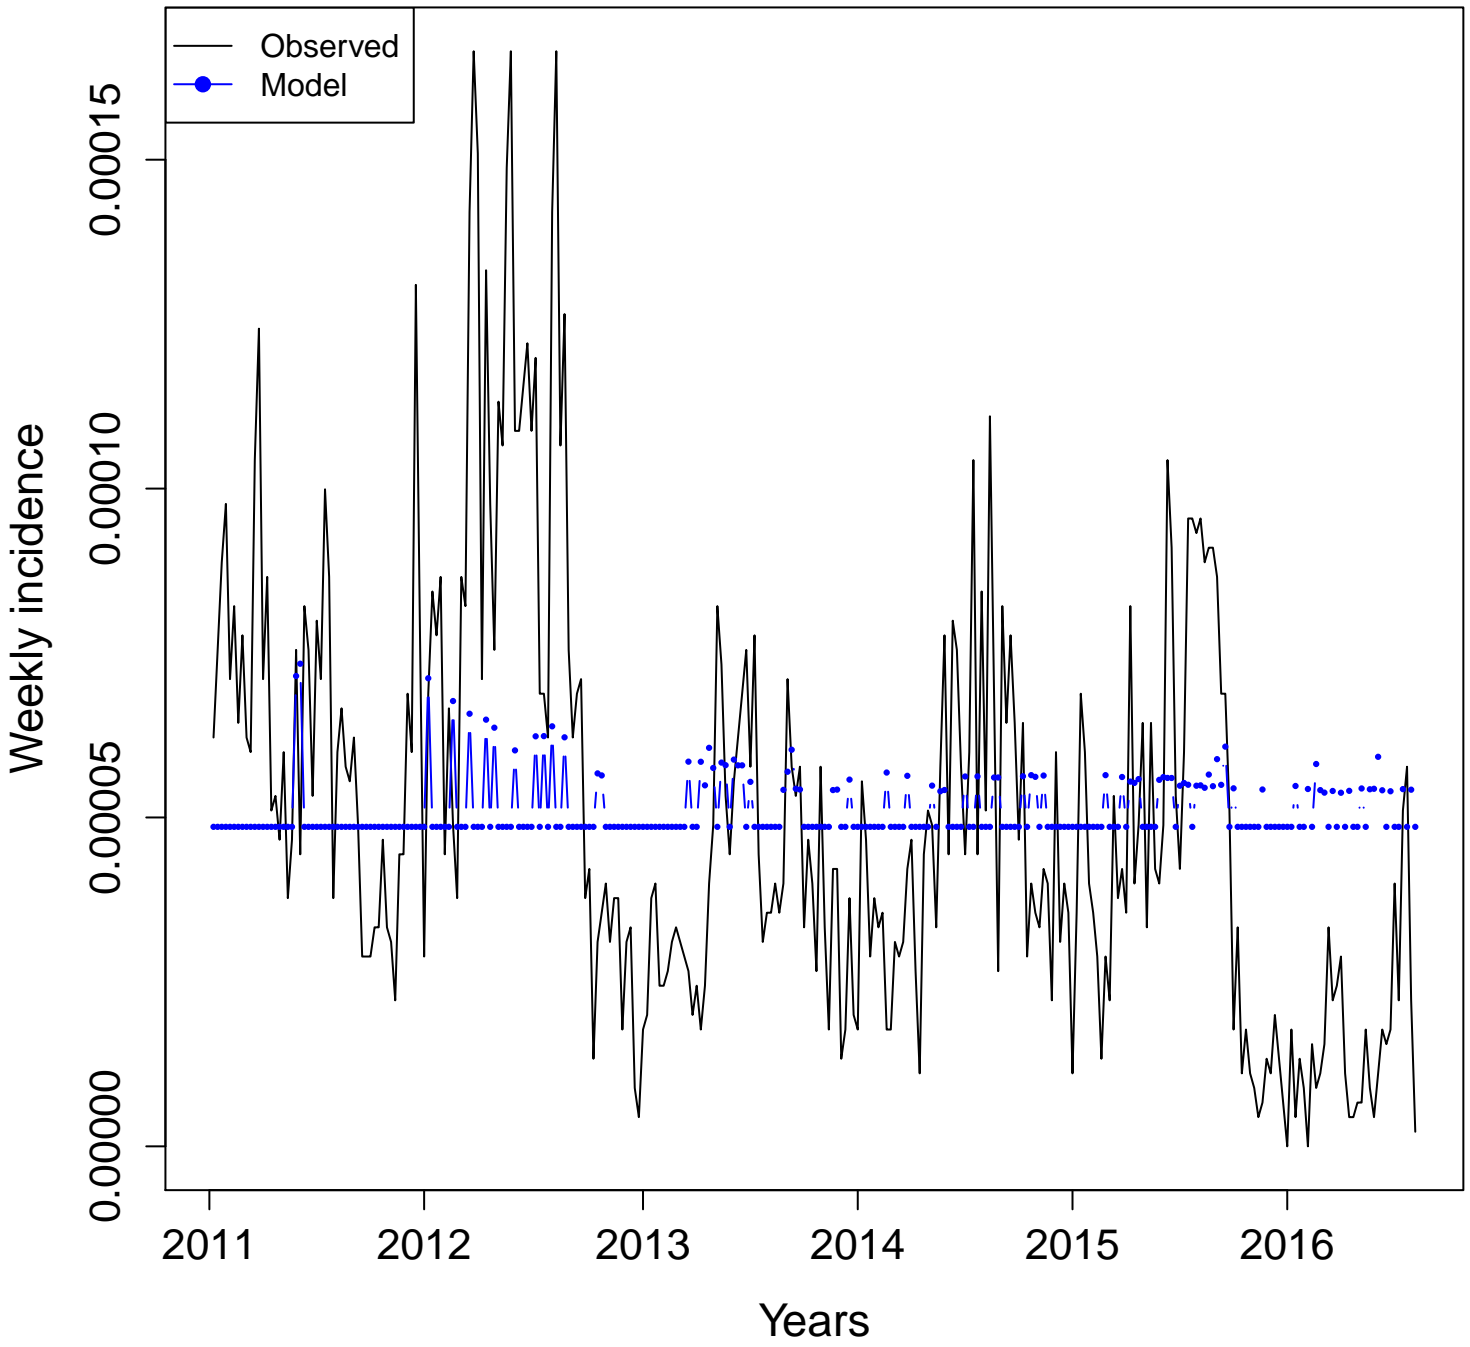

**RR- mosquito**  
**Adj. R squared = -0.0017**

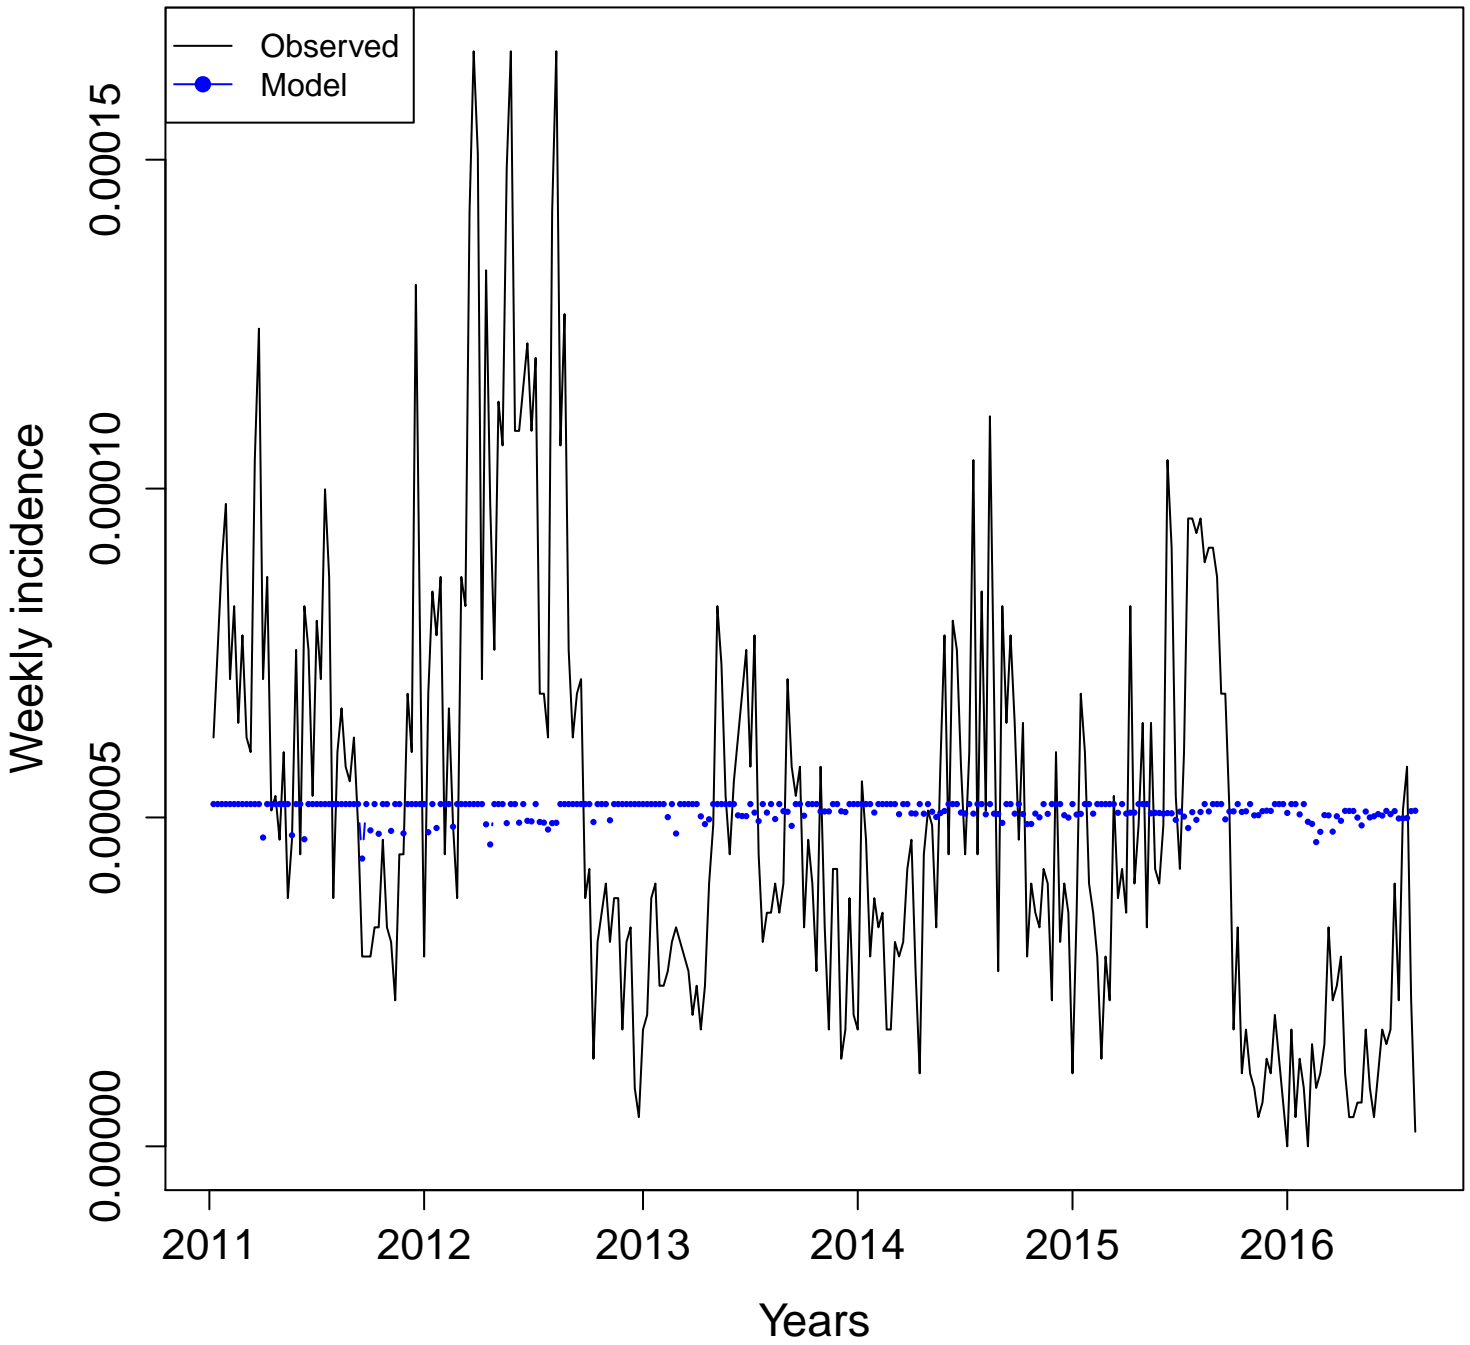

**RR- sintomas.da.dengue**  
**Adj. R squared = 7e-04**

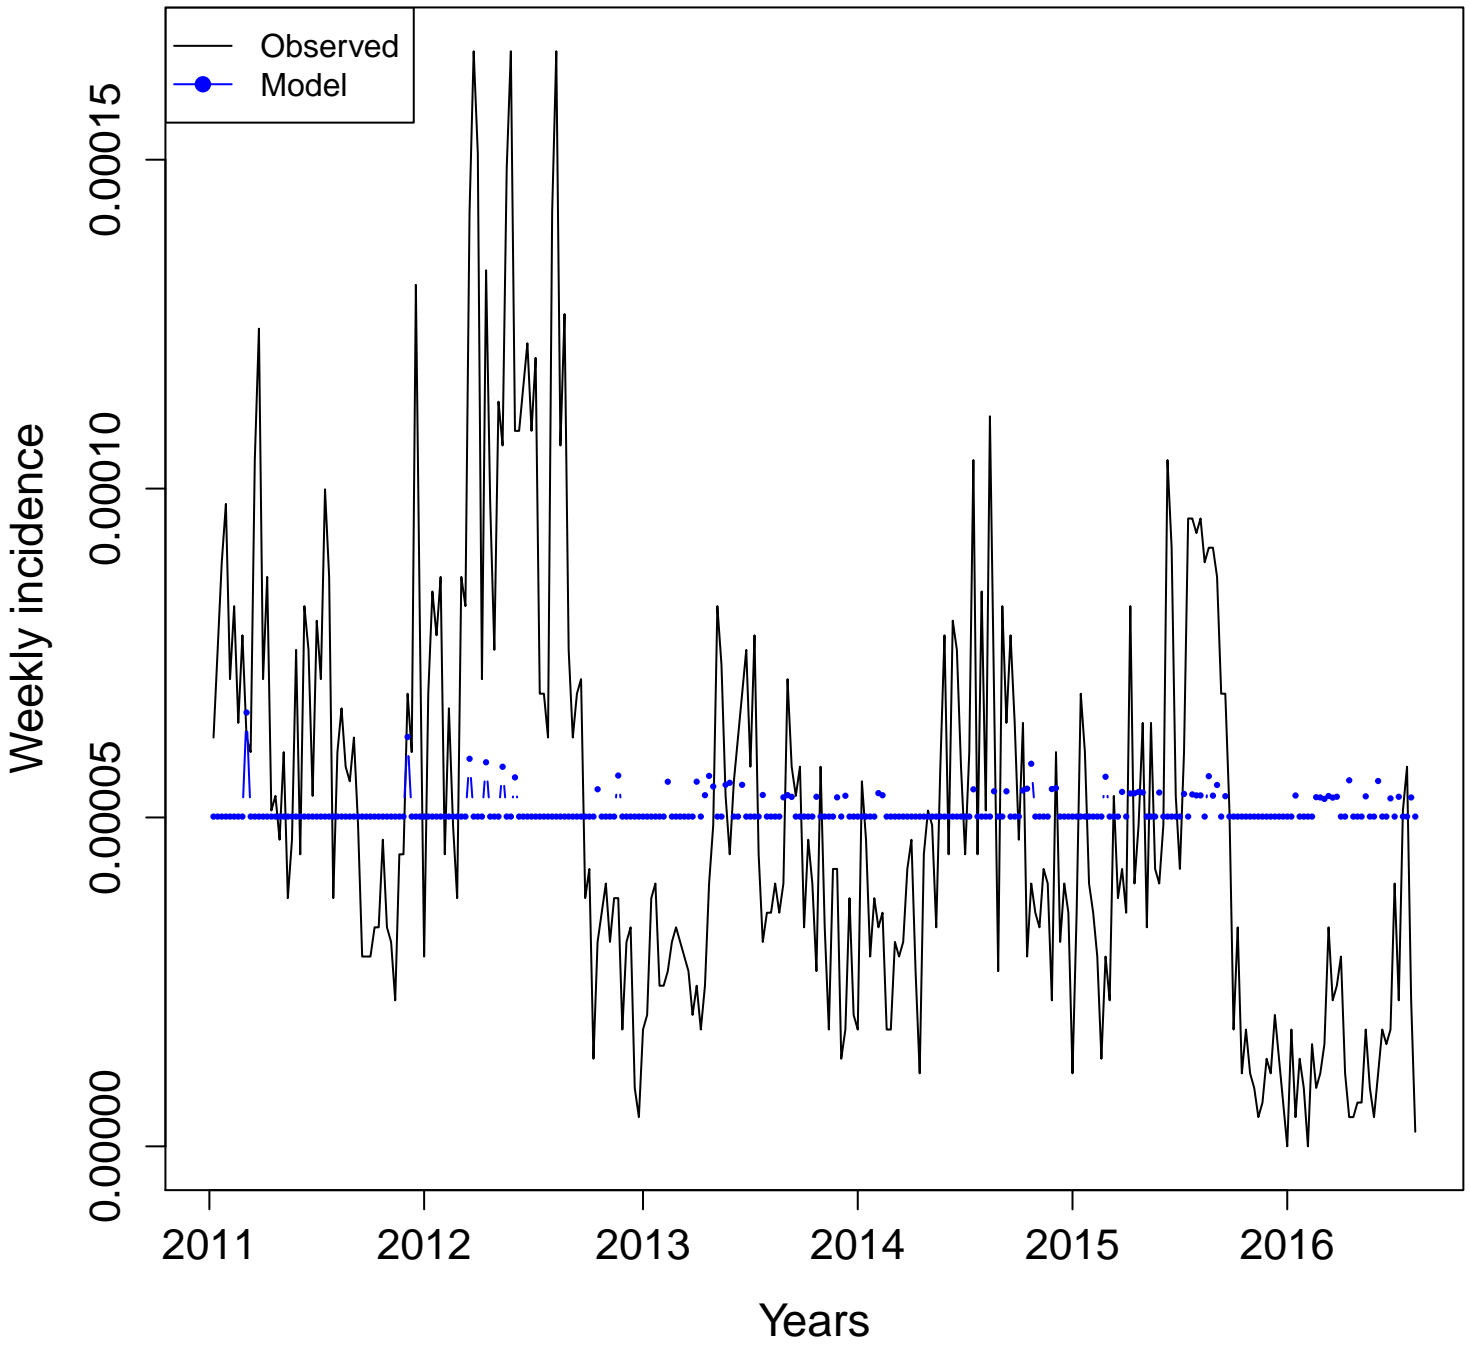

# Rio Grande do Sul (RS)

## Dengue incidence vs. Google Health Trends (2011–2016)

### Definitions:

- **Combined terms:**
  - **All:** model with all the available terms.  $n =$  number of terms
  - **Four:** model with "dengue", "dengue sintomas", "aedes", and "mosquito".
  - **Uncorrelated:** model with non-correlated terms.  $n =$  number of uncorrelated terms
- **Individual terms:** Plots developed with one term at a time.
- Terms for all and uncorrelated models can be found in additional file 3.



**Combined terms  
Adjusted R squared**

**Rio Grande do Sul  
(RS)**

**All**  
**(n = 12)**

**BR-RS**  
**Adj. R squared = 0.8043**

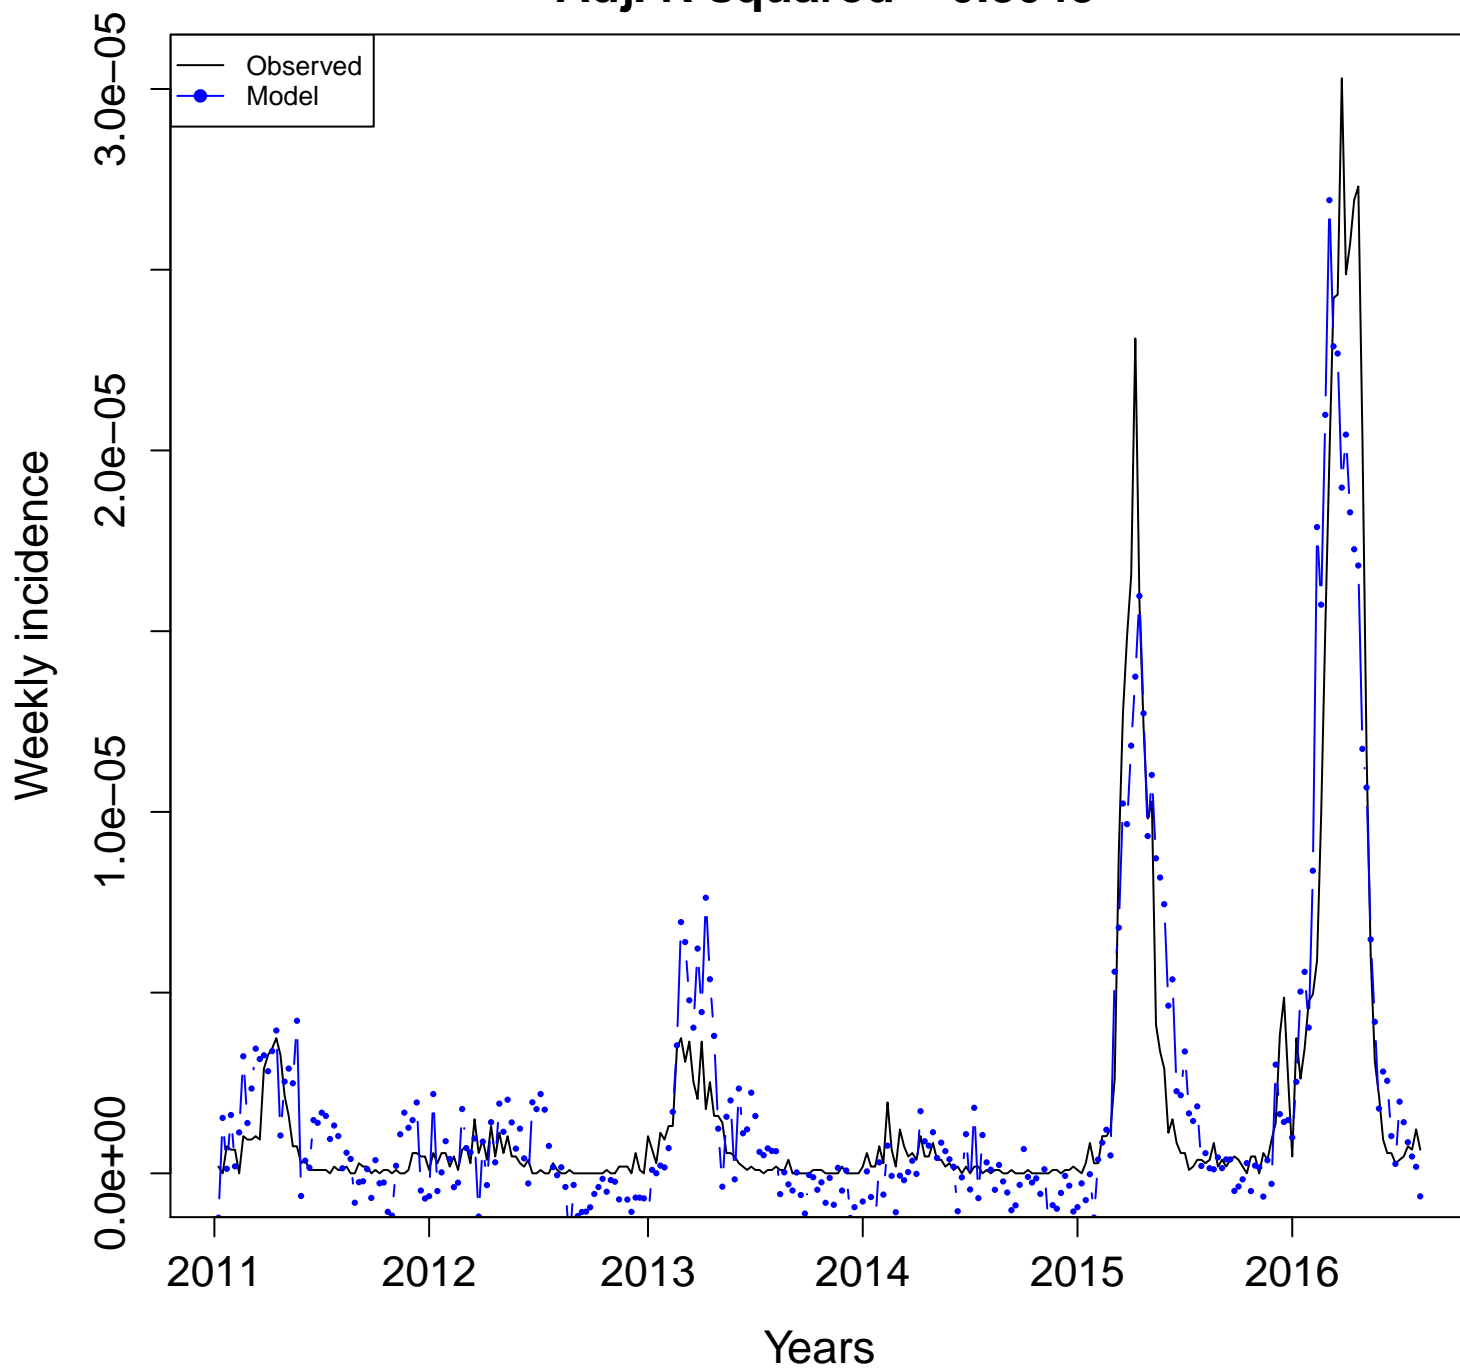

**BR-RS**  
**Adj. R squared = 0.7786**

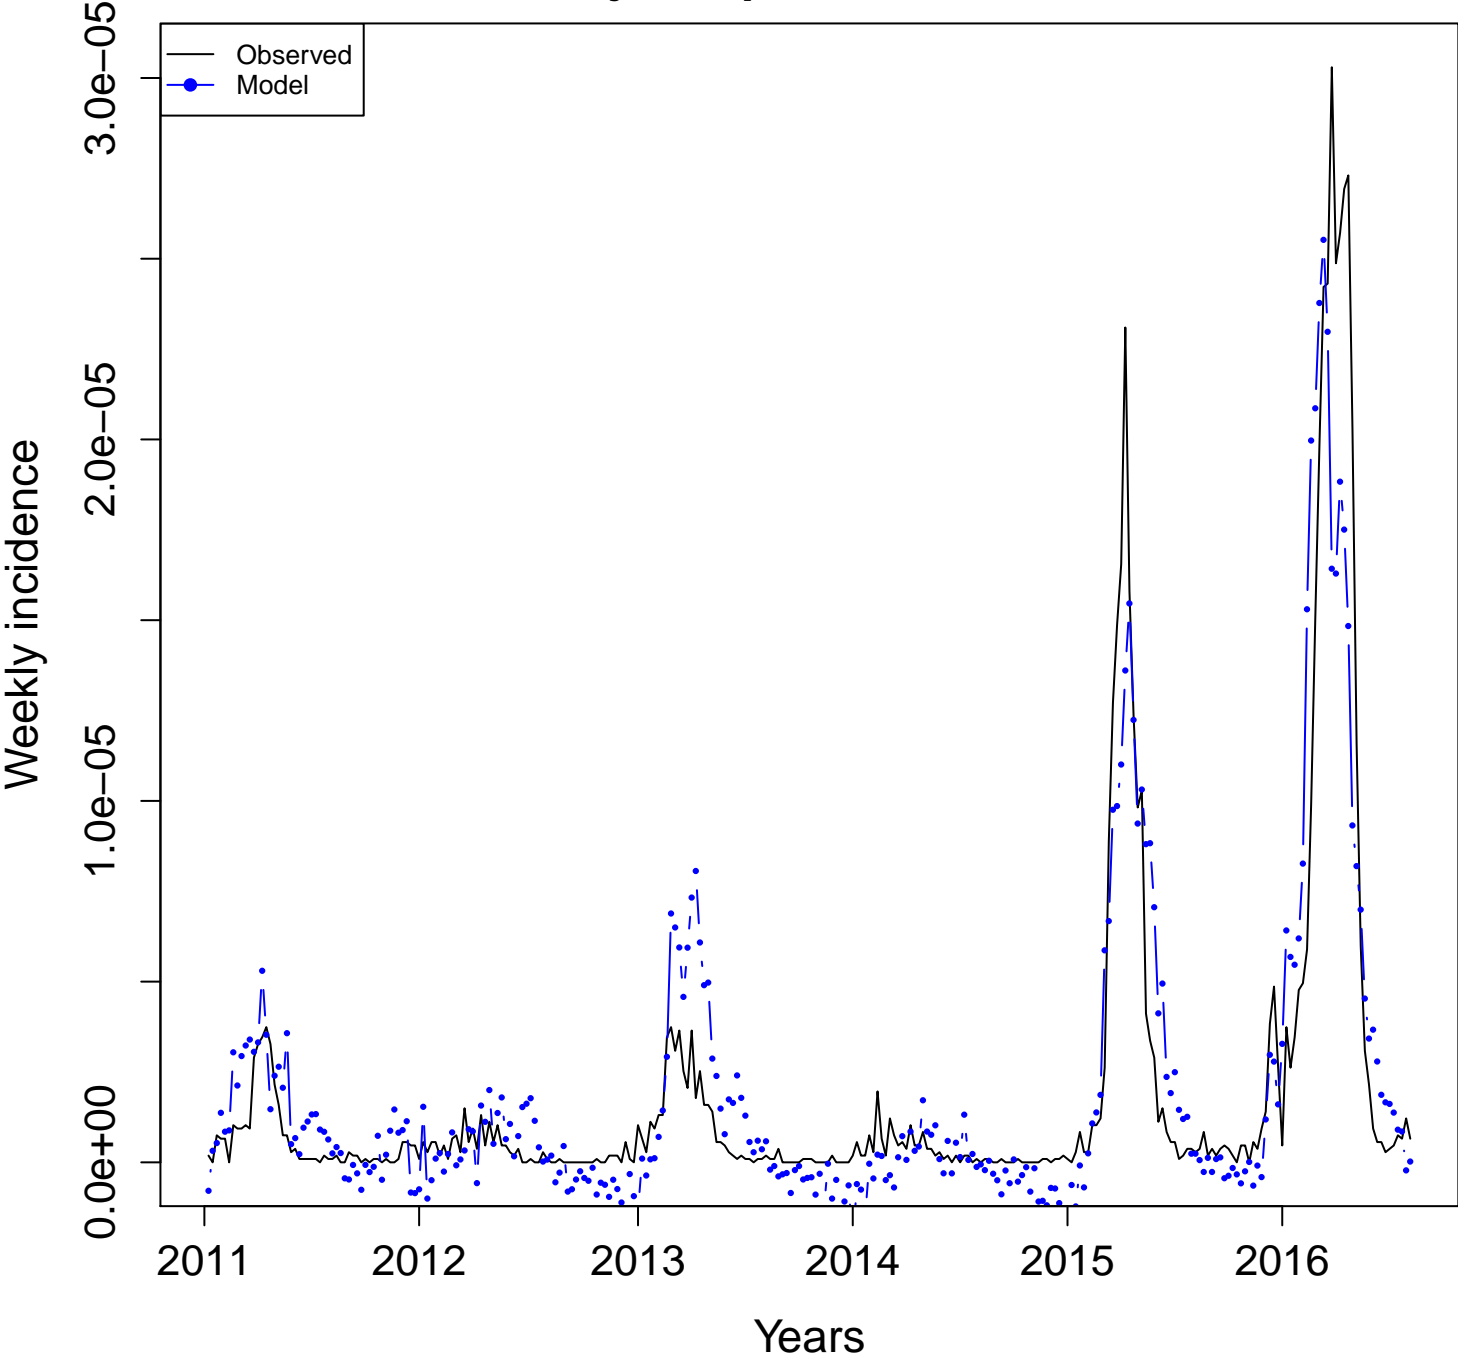

**Uncorrelated  
(n = 4)**

**BR-RS  
Adj. R squared = 0.7242**

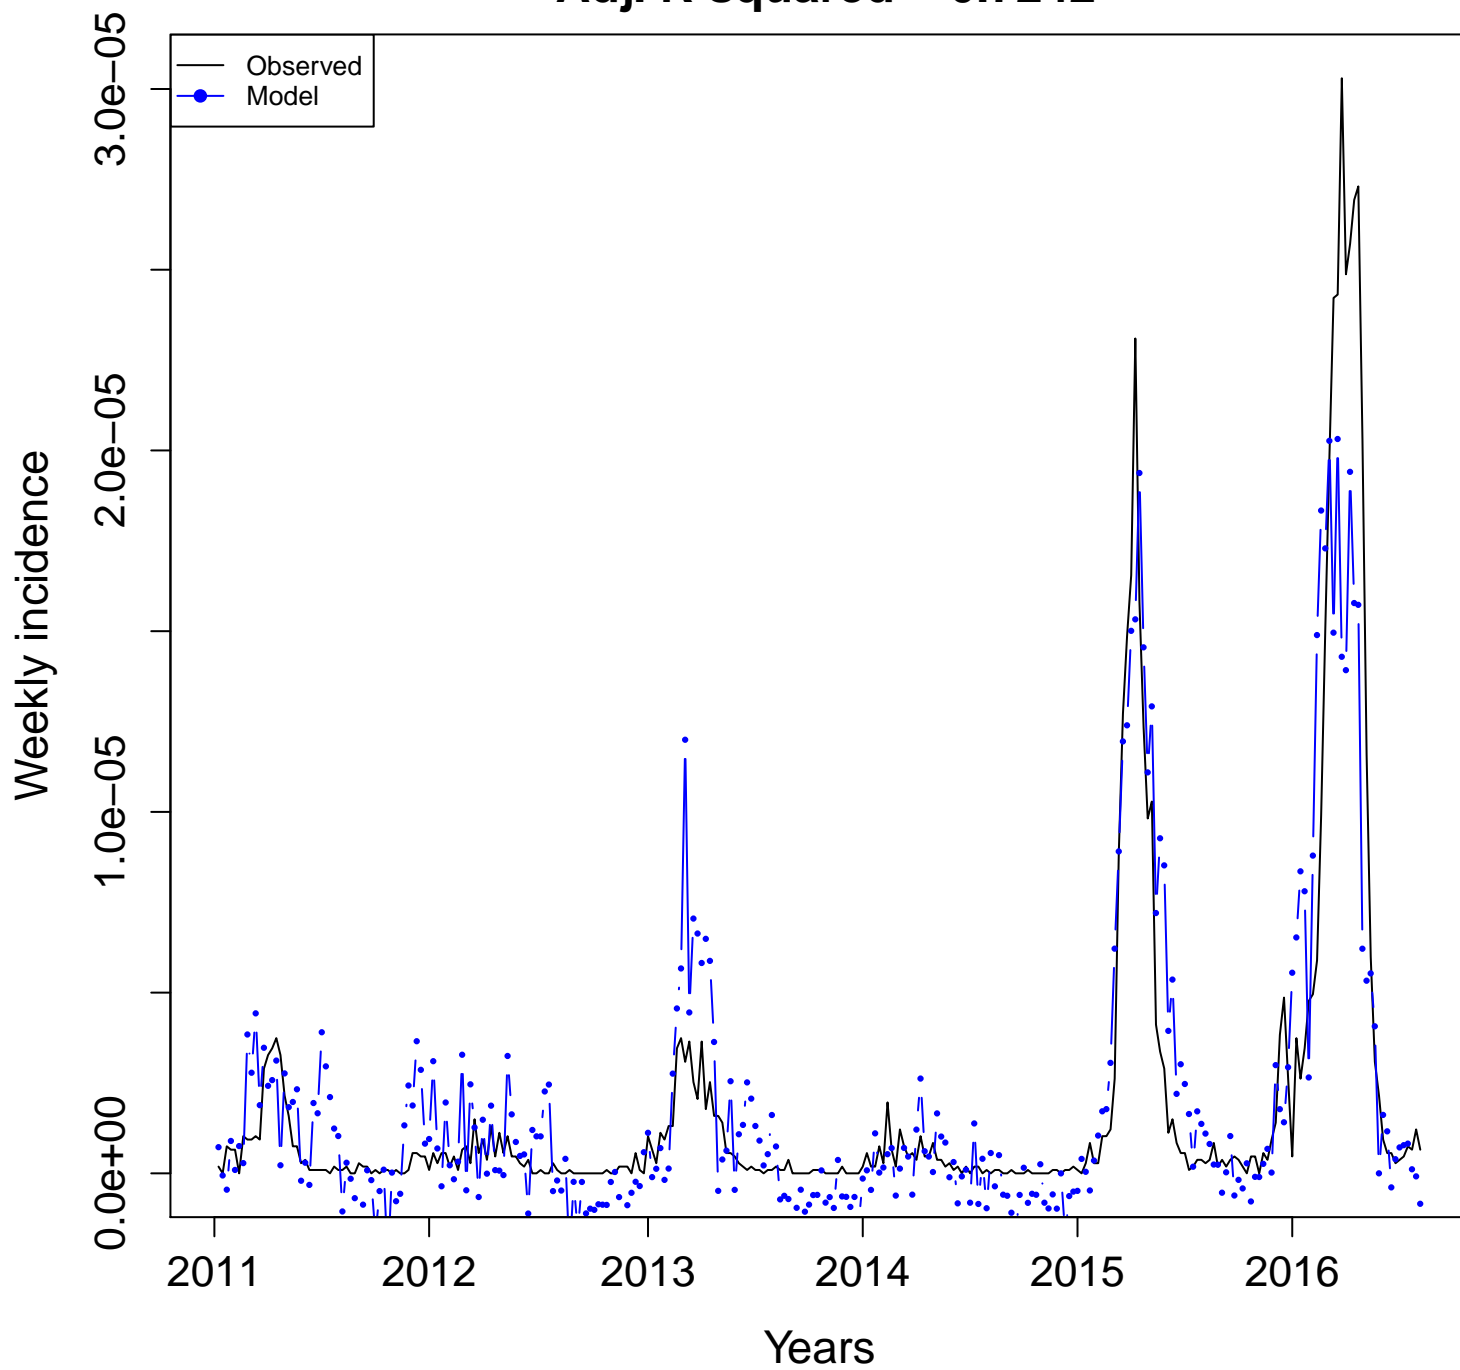

**Individual terms**  
**Adjusted R squared**

**Rio Grande do Sul**  
**(RS)**

**RS- aedes.aegypti**  
**Adj. R squared = 0.5611**

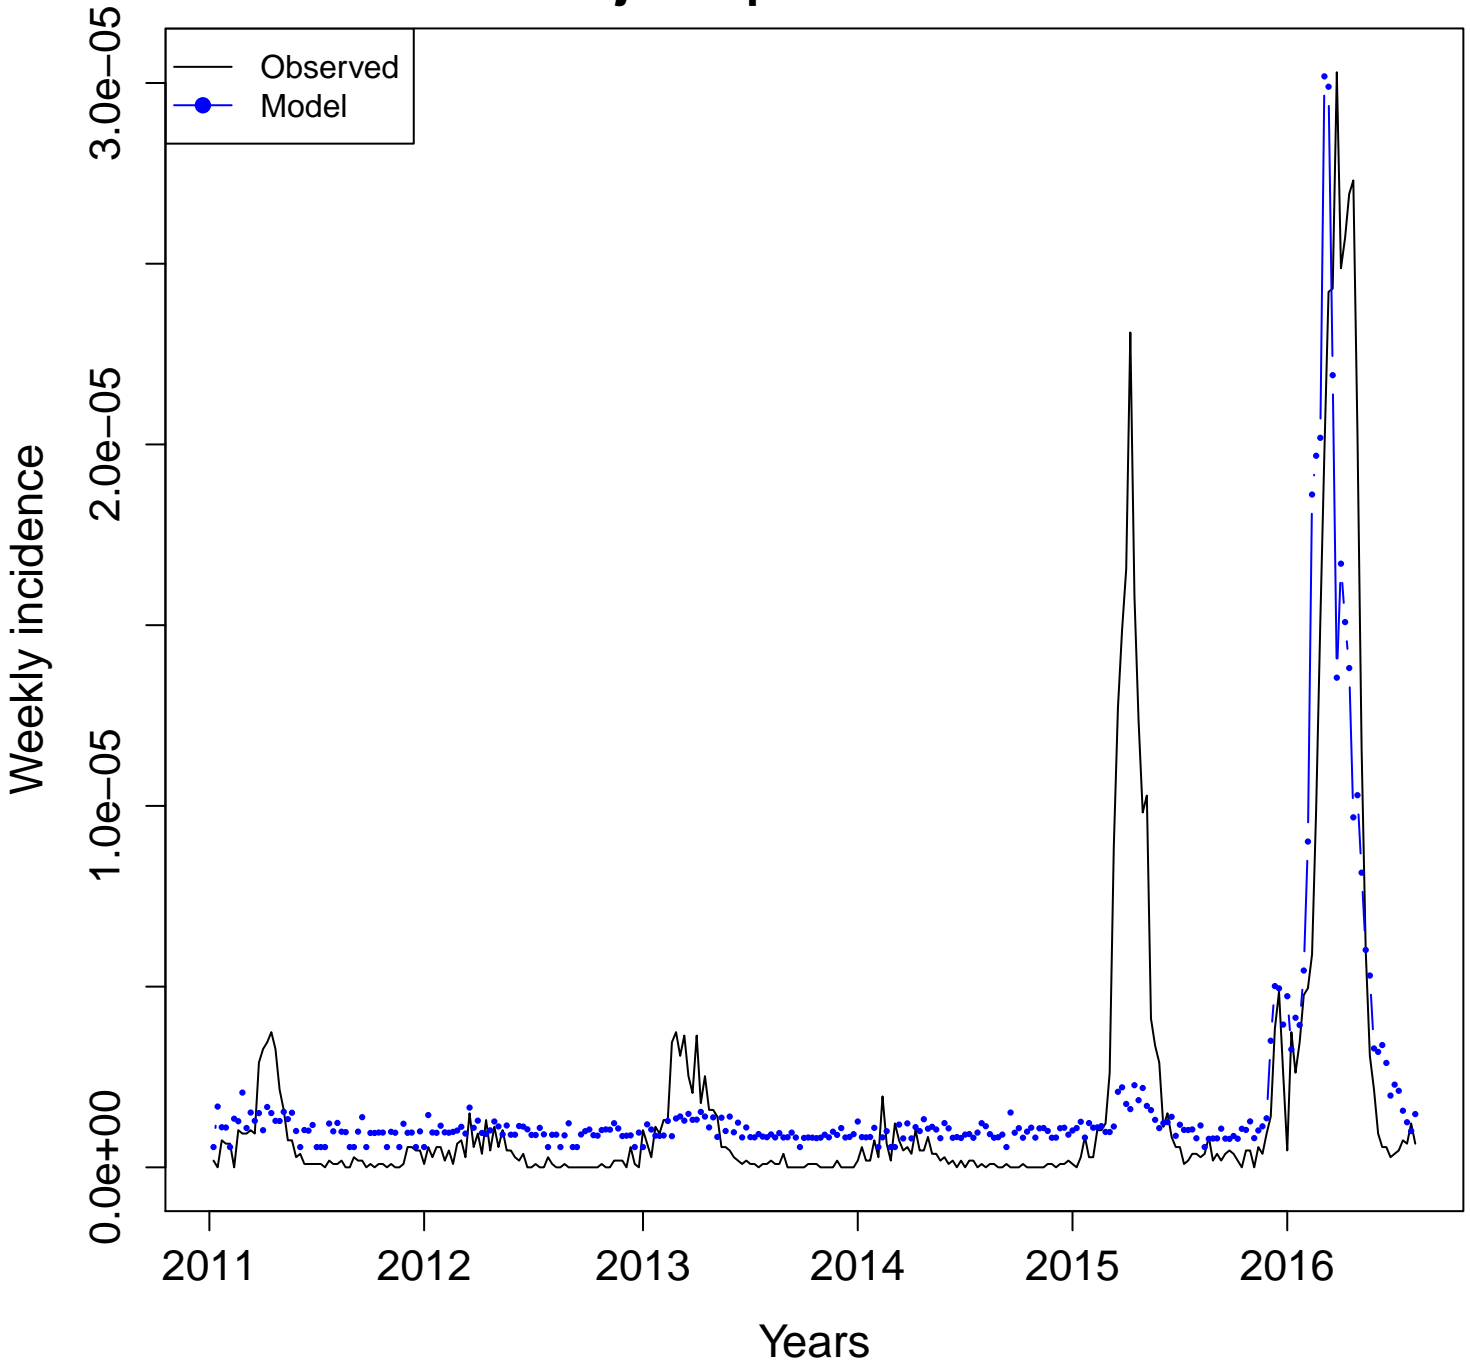

**RS- aedes**  
**Adj. R squared = 0.5374**

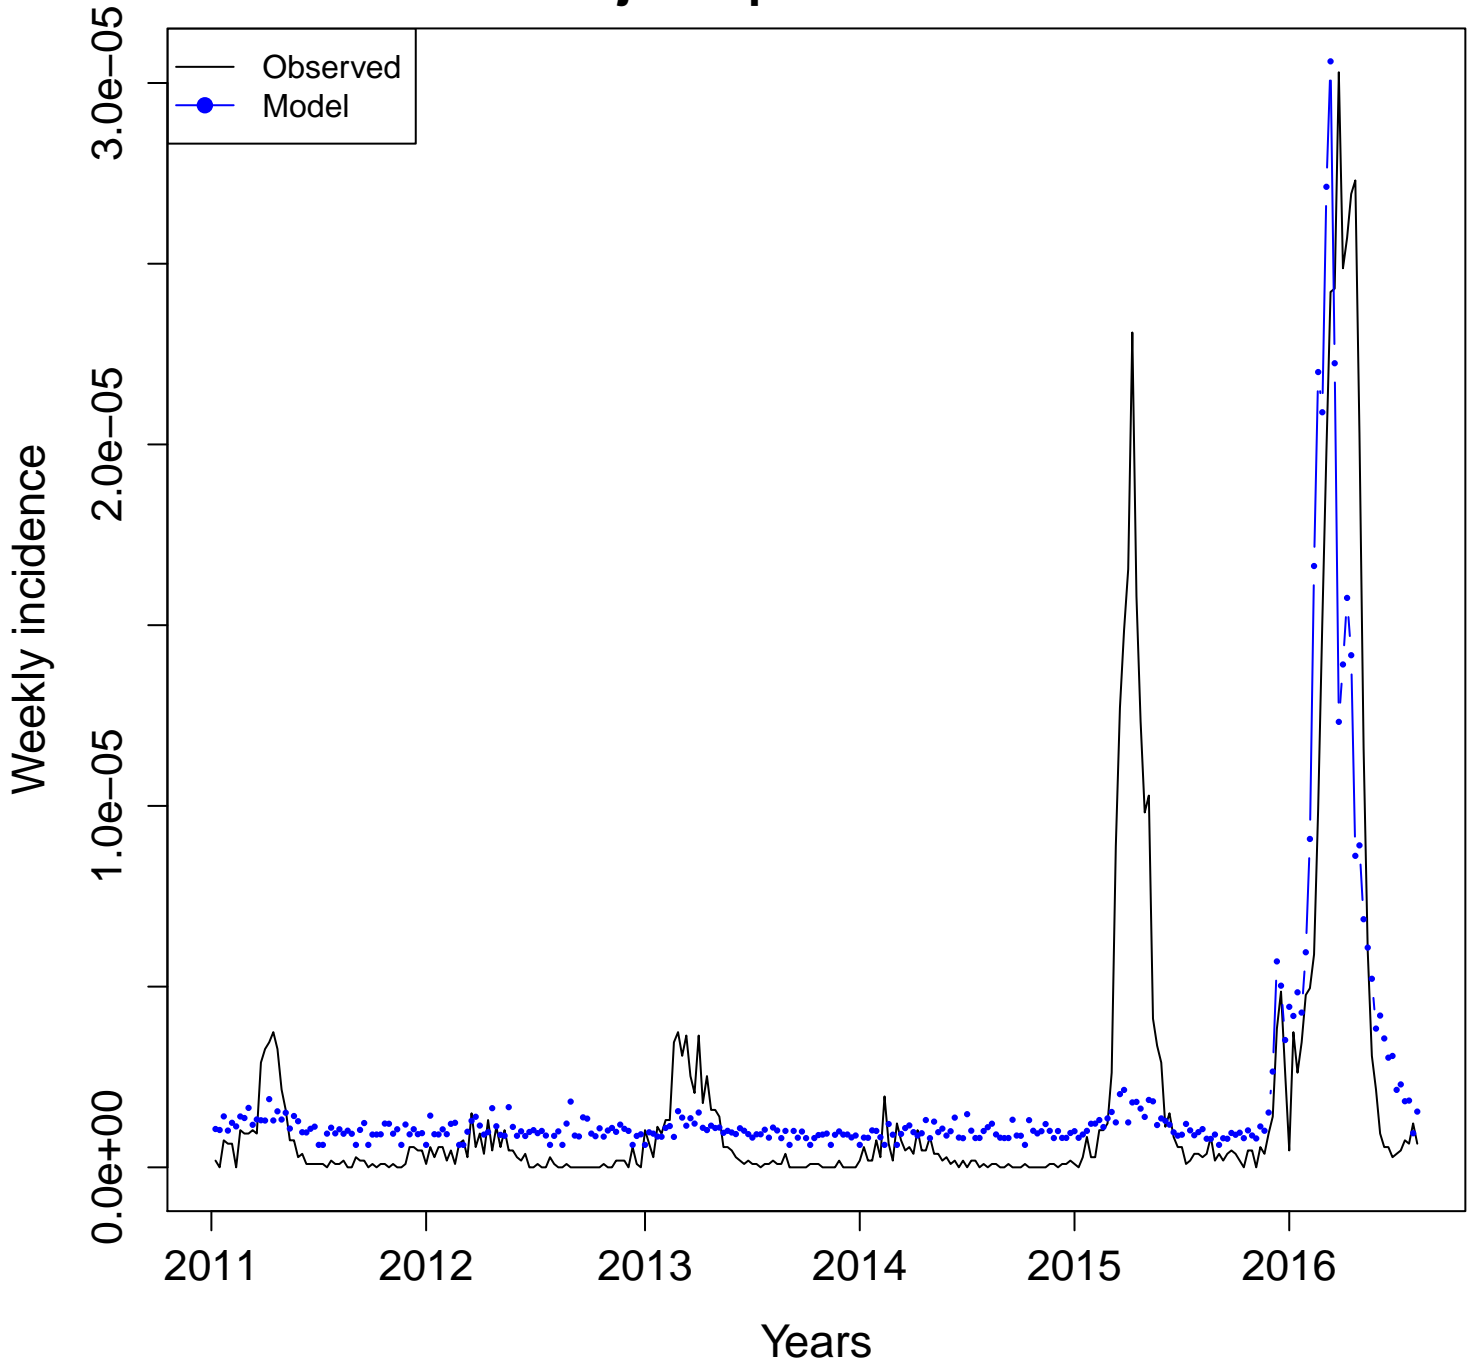

**RS- aegypti**  
**Adj. R squared = 0.5619**

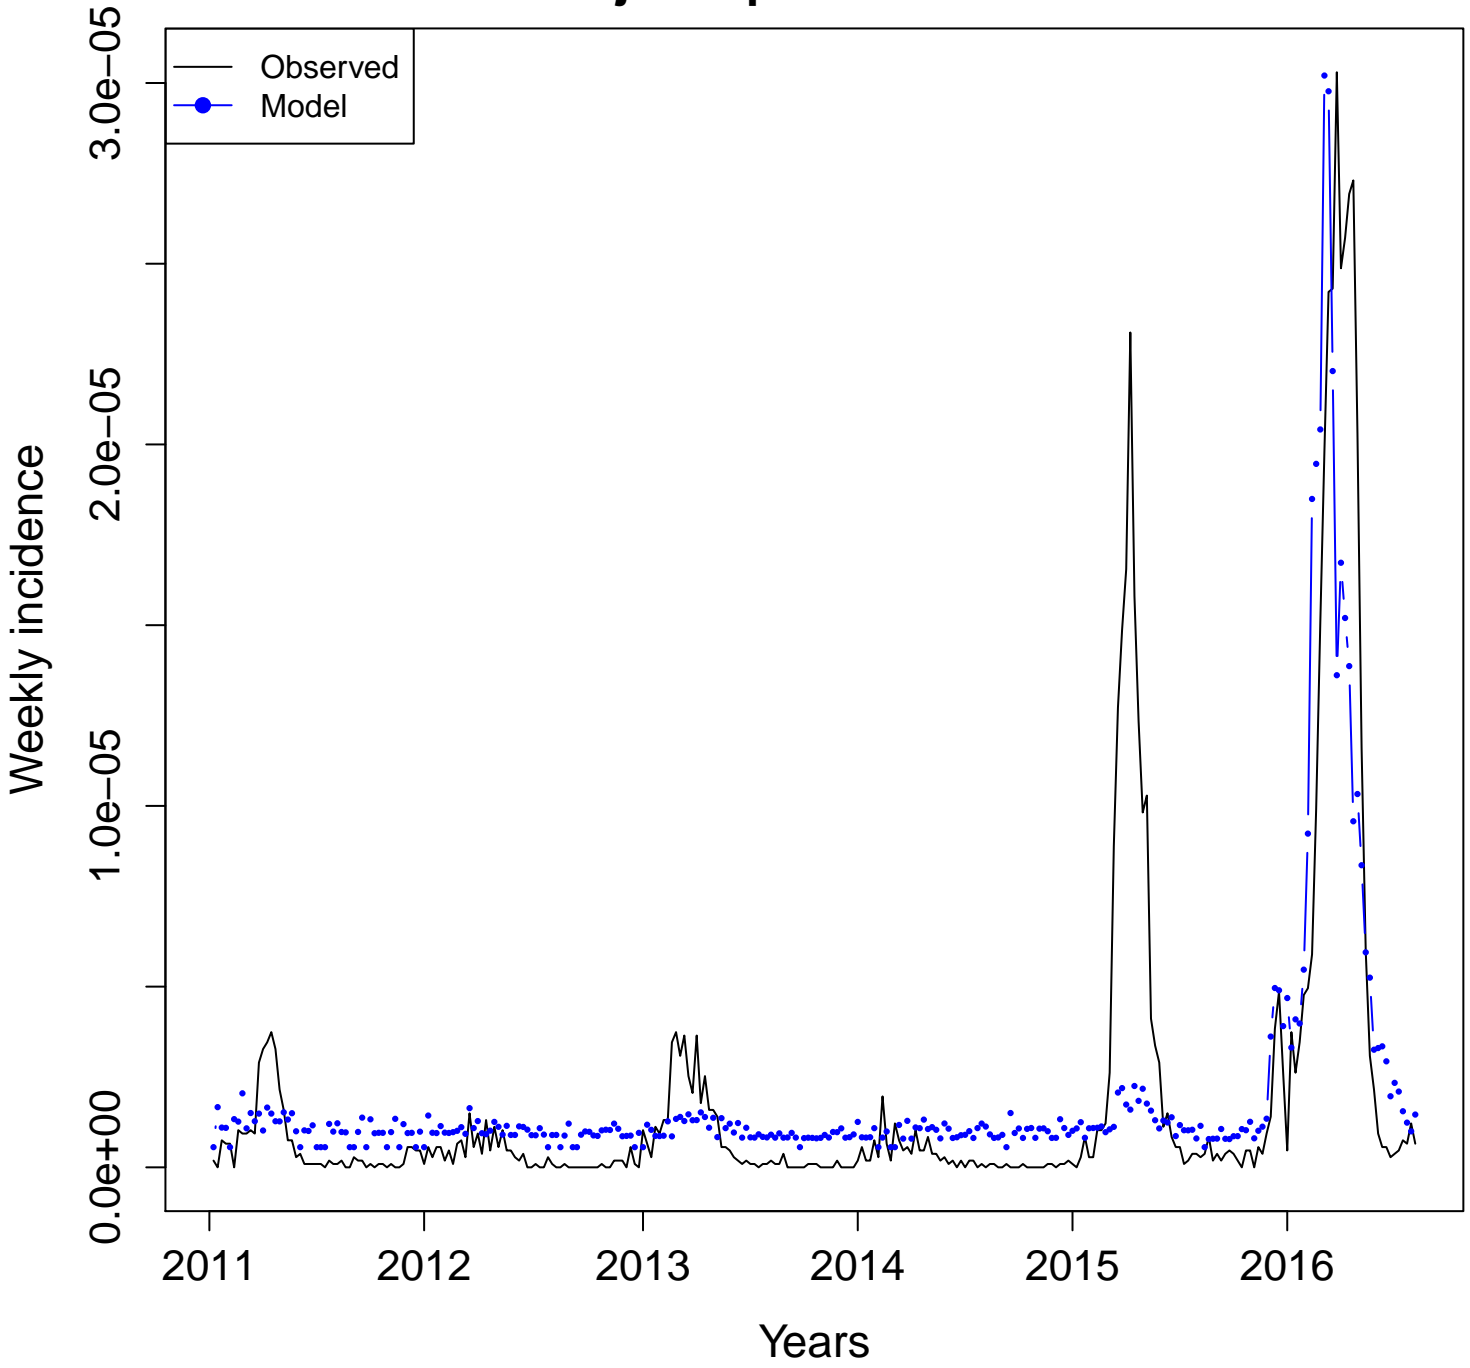



**RS- dengue.fever**  
**Adj. R squared = -0.0033**

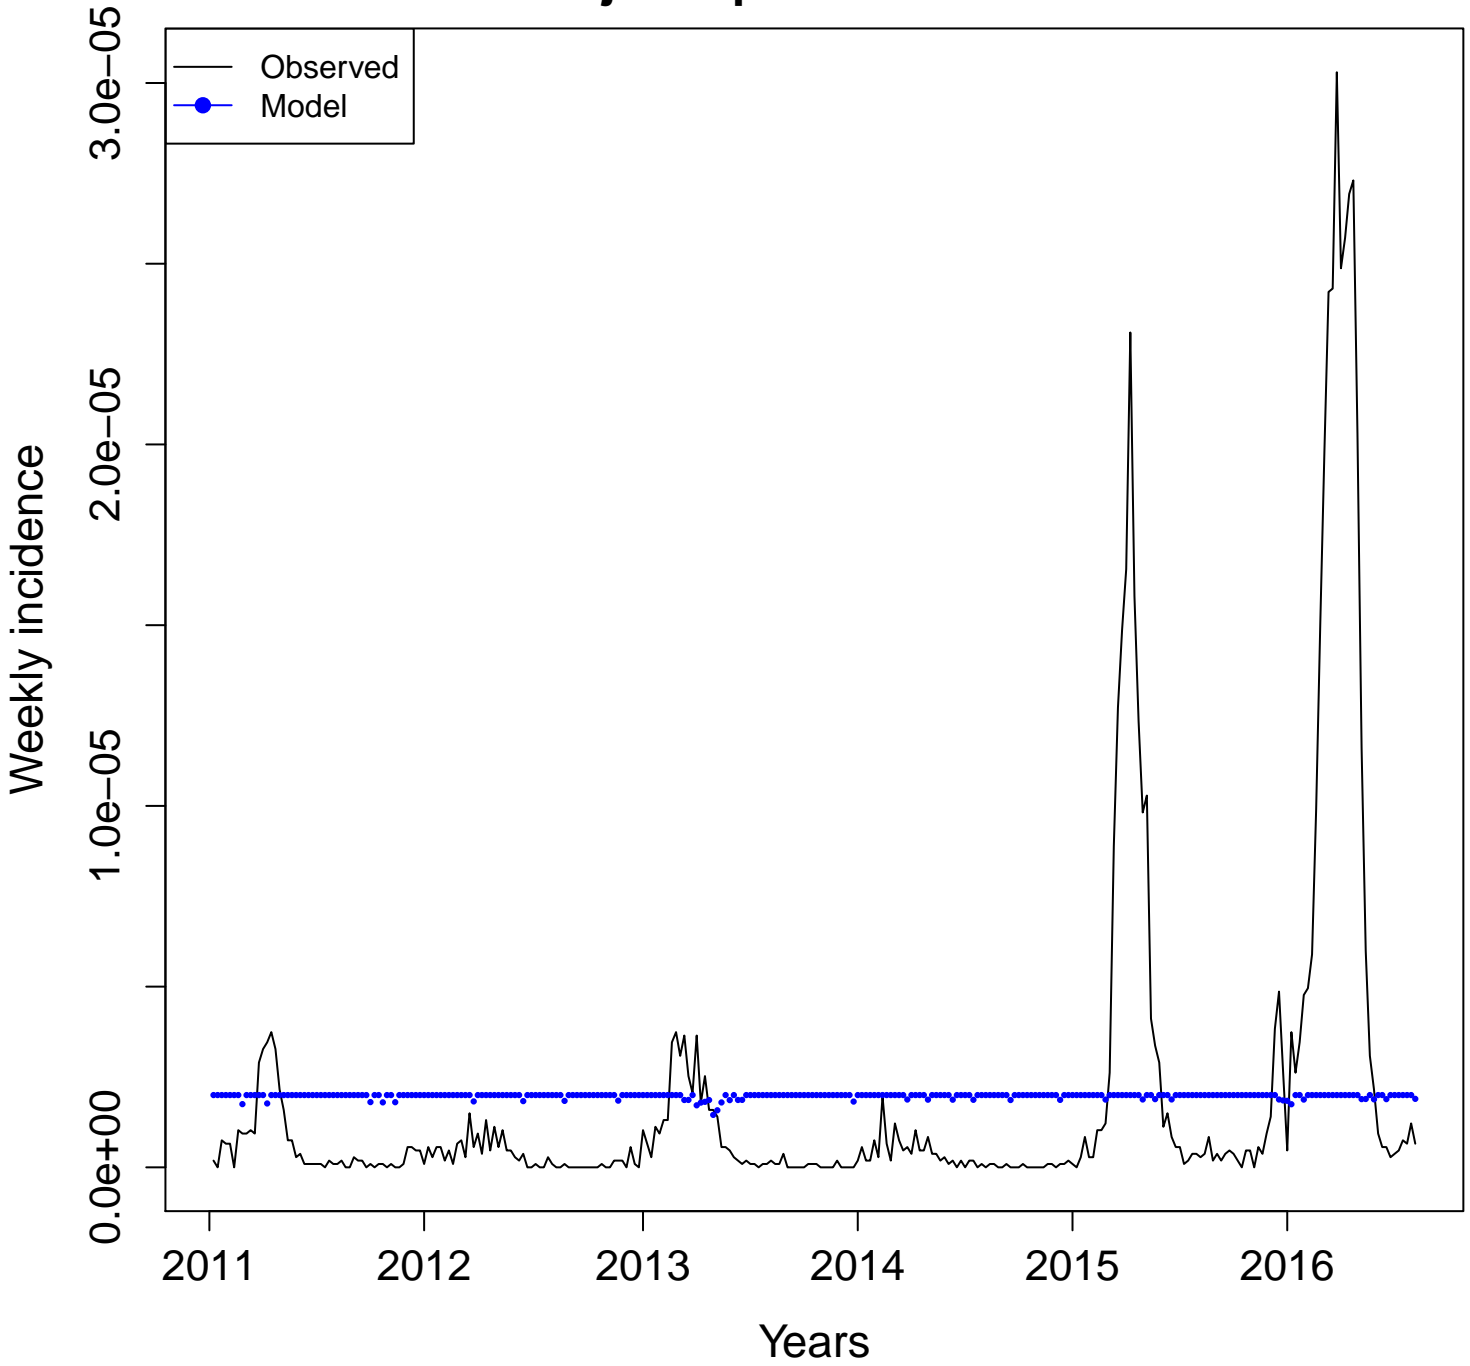

**RS- dengue**  
**Adj. R squared = 0.7513**

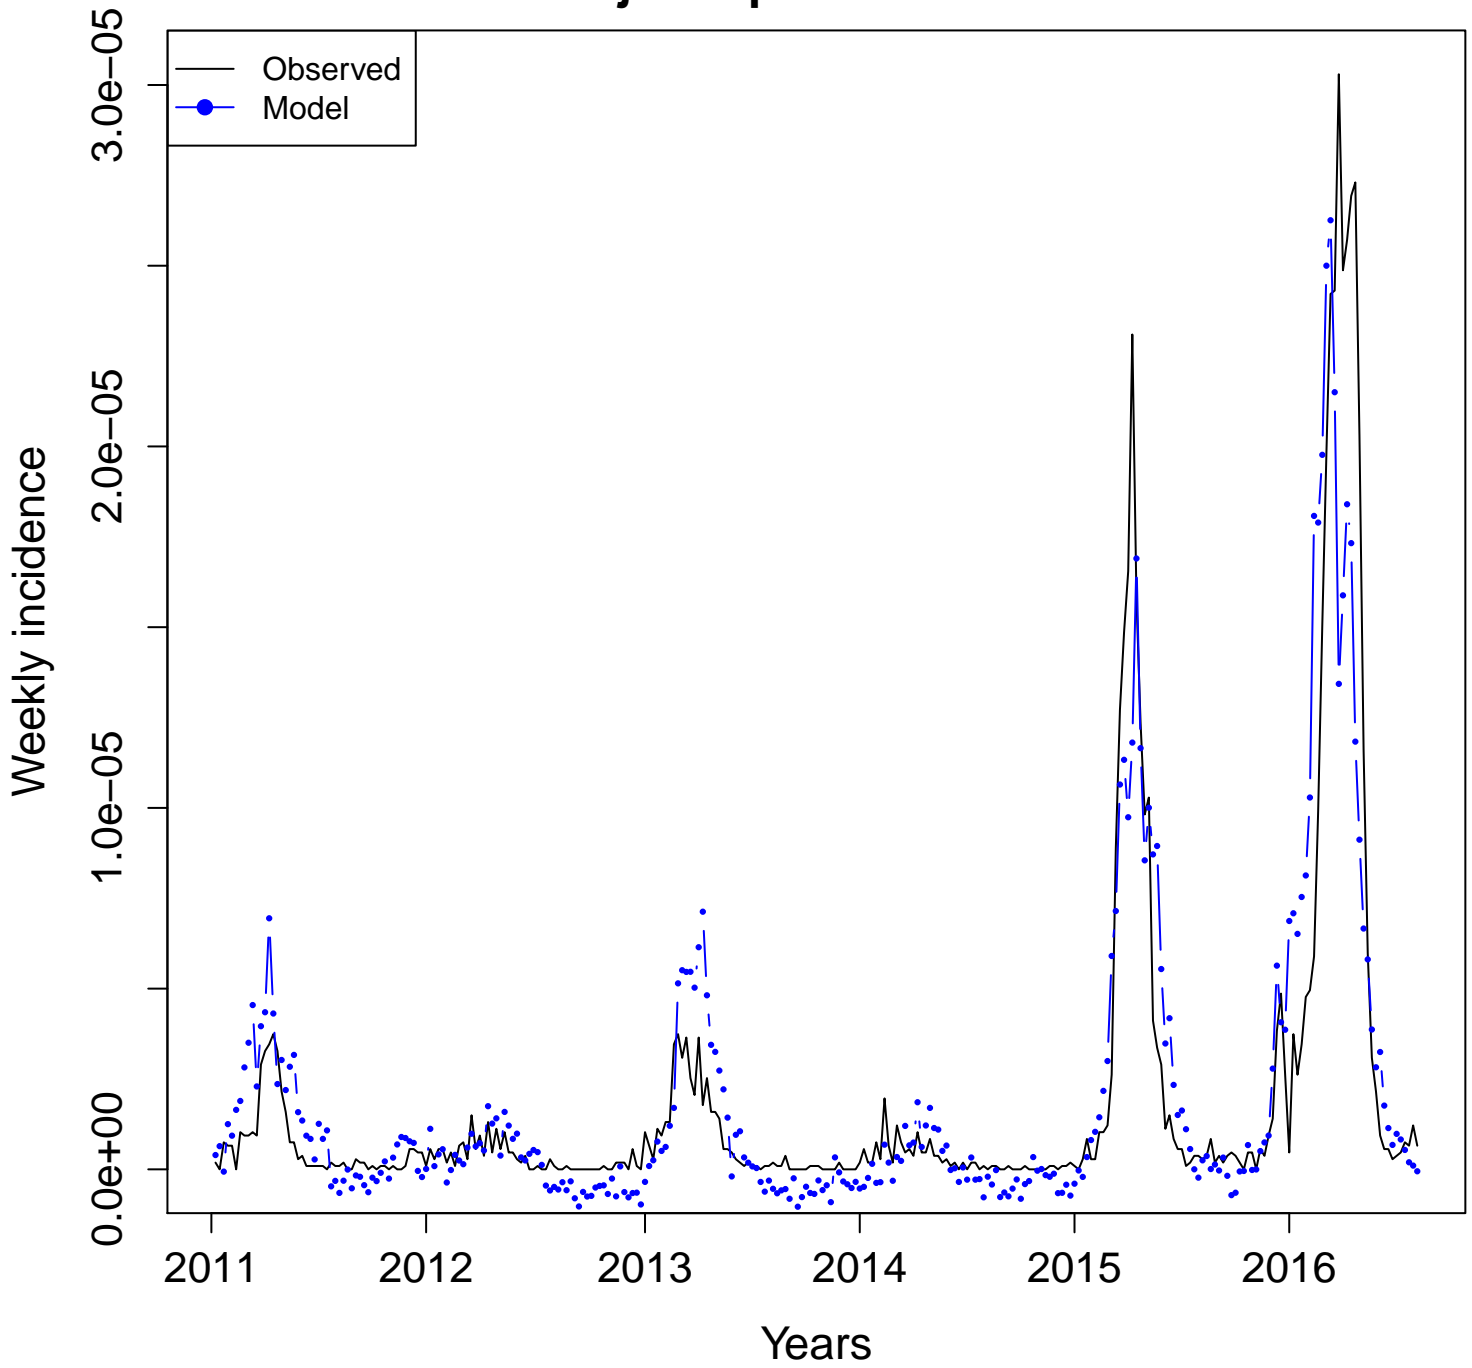

**RS- dengue.sintomas**  
**Adj. R squared = 0.7292**

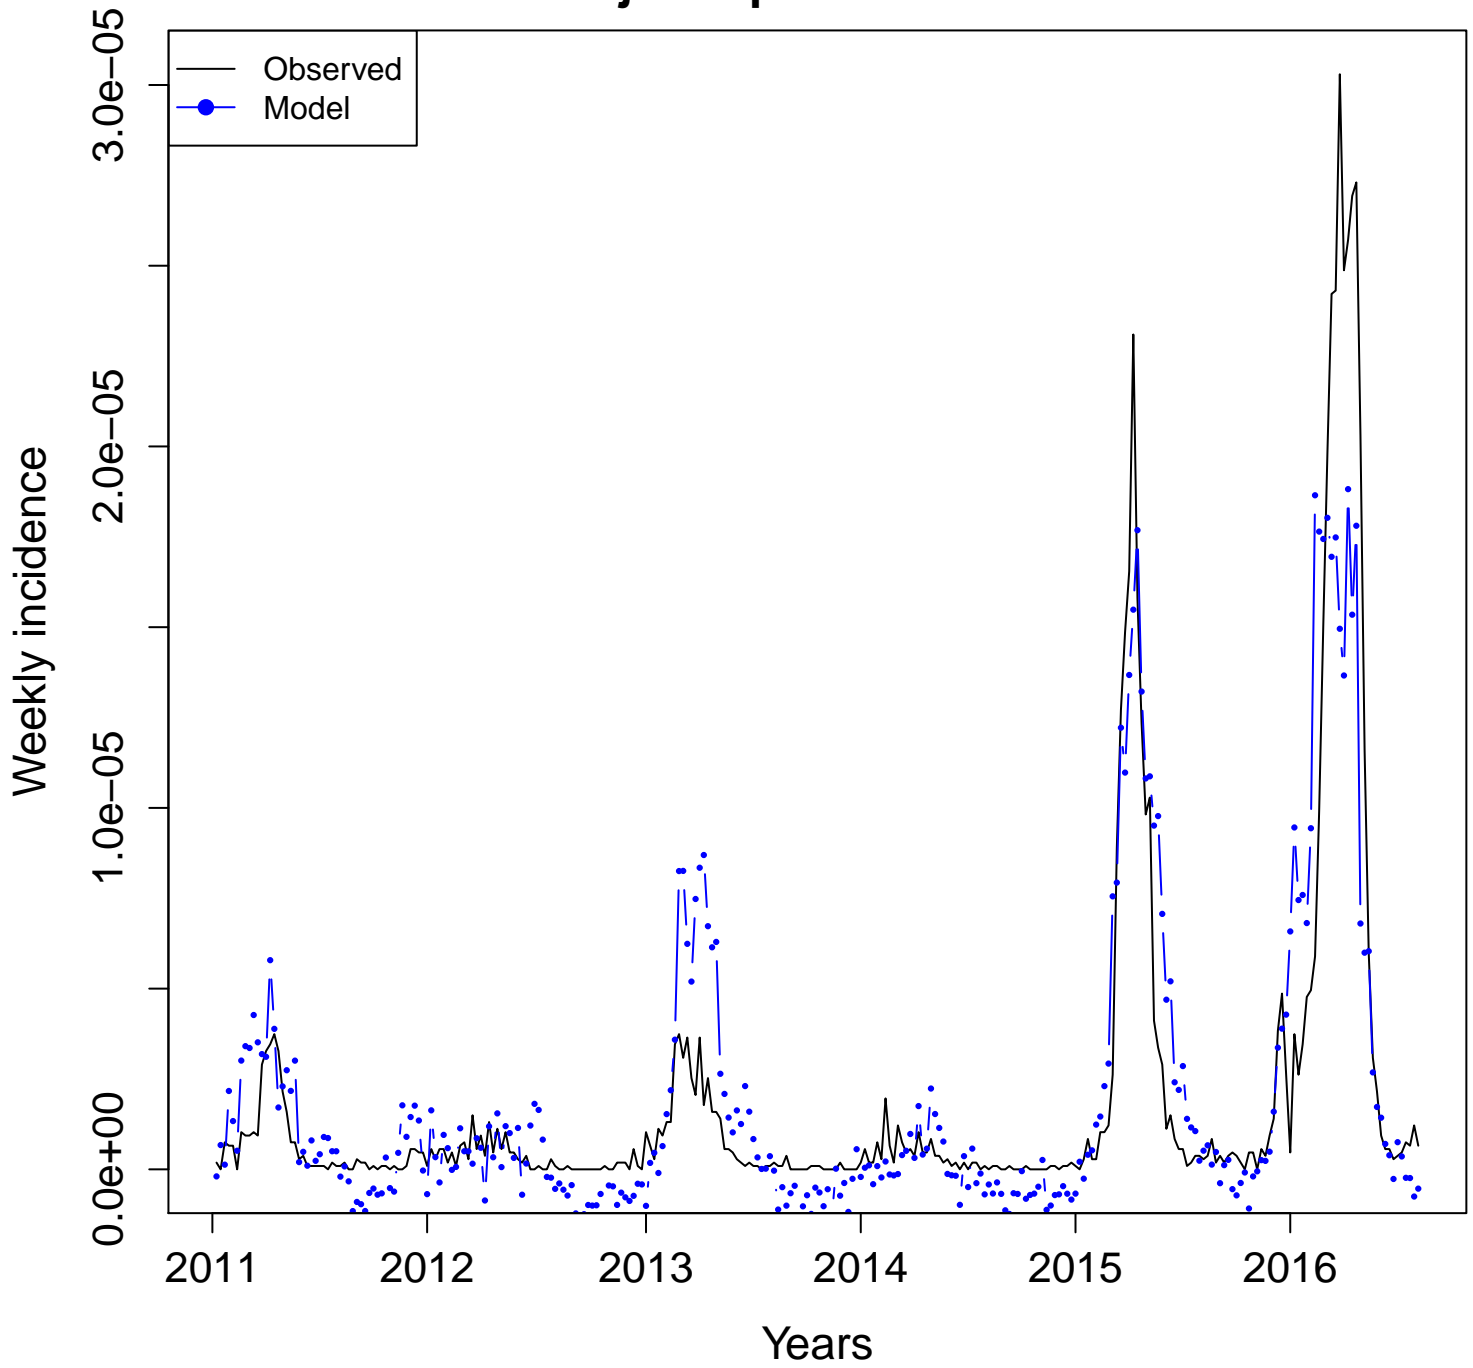

**RS- dengue.virus**  
**Adj. R squared = 0.5576**

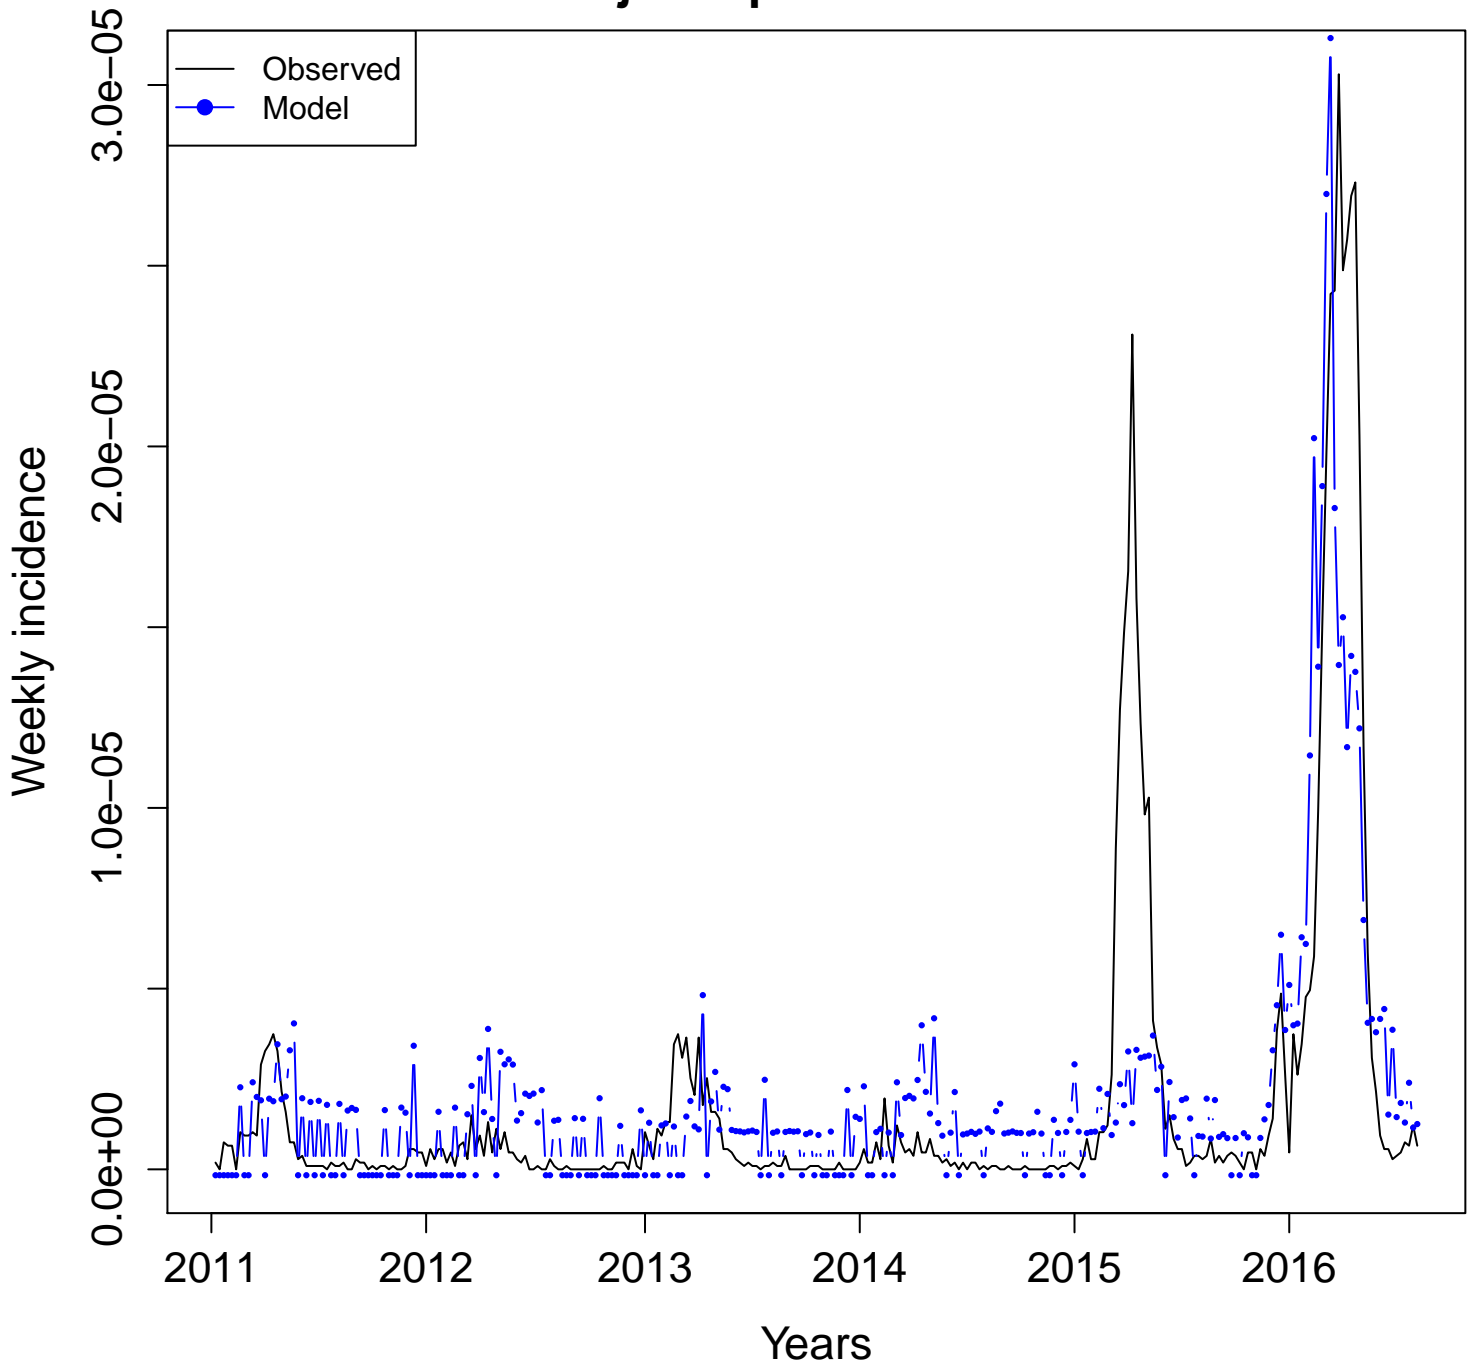

**RS- DHF**  
**Adj. R squared = -0.0031**

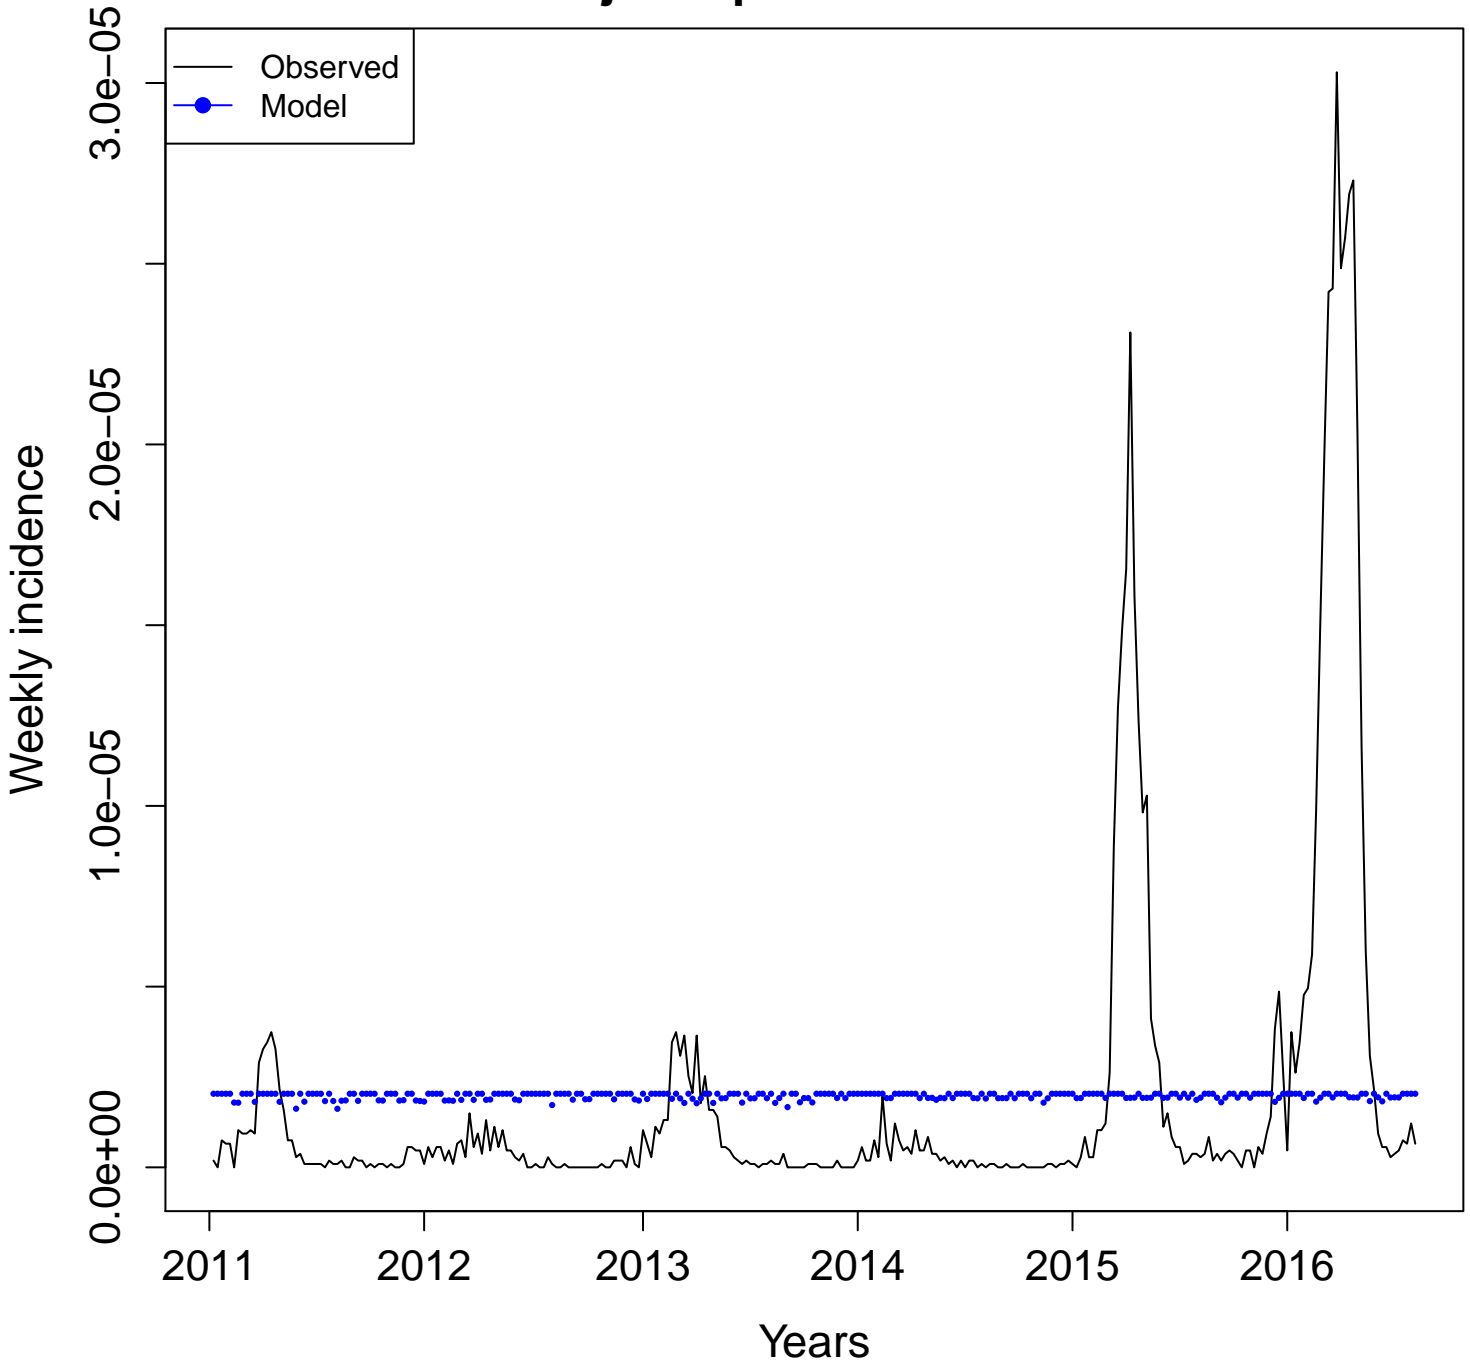

**RS- mosquito.dengue**  
**Adj. R squared = 0.6513**

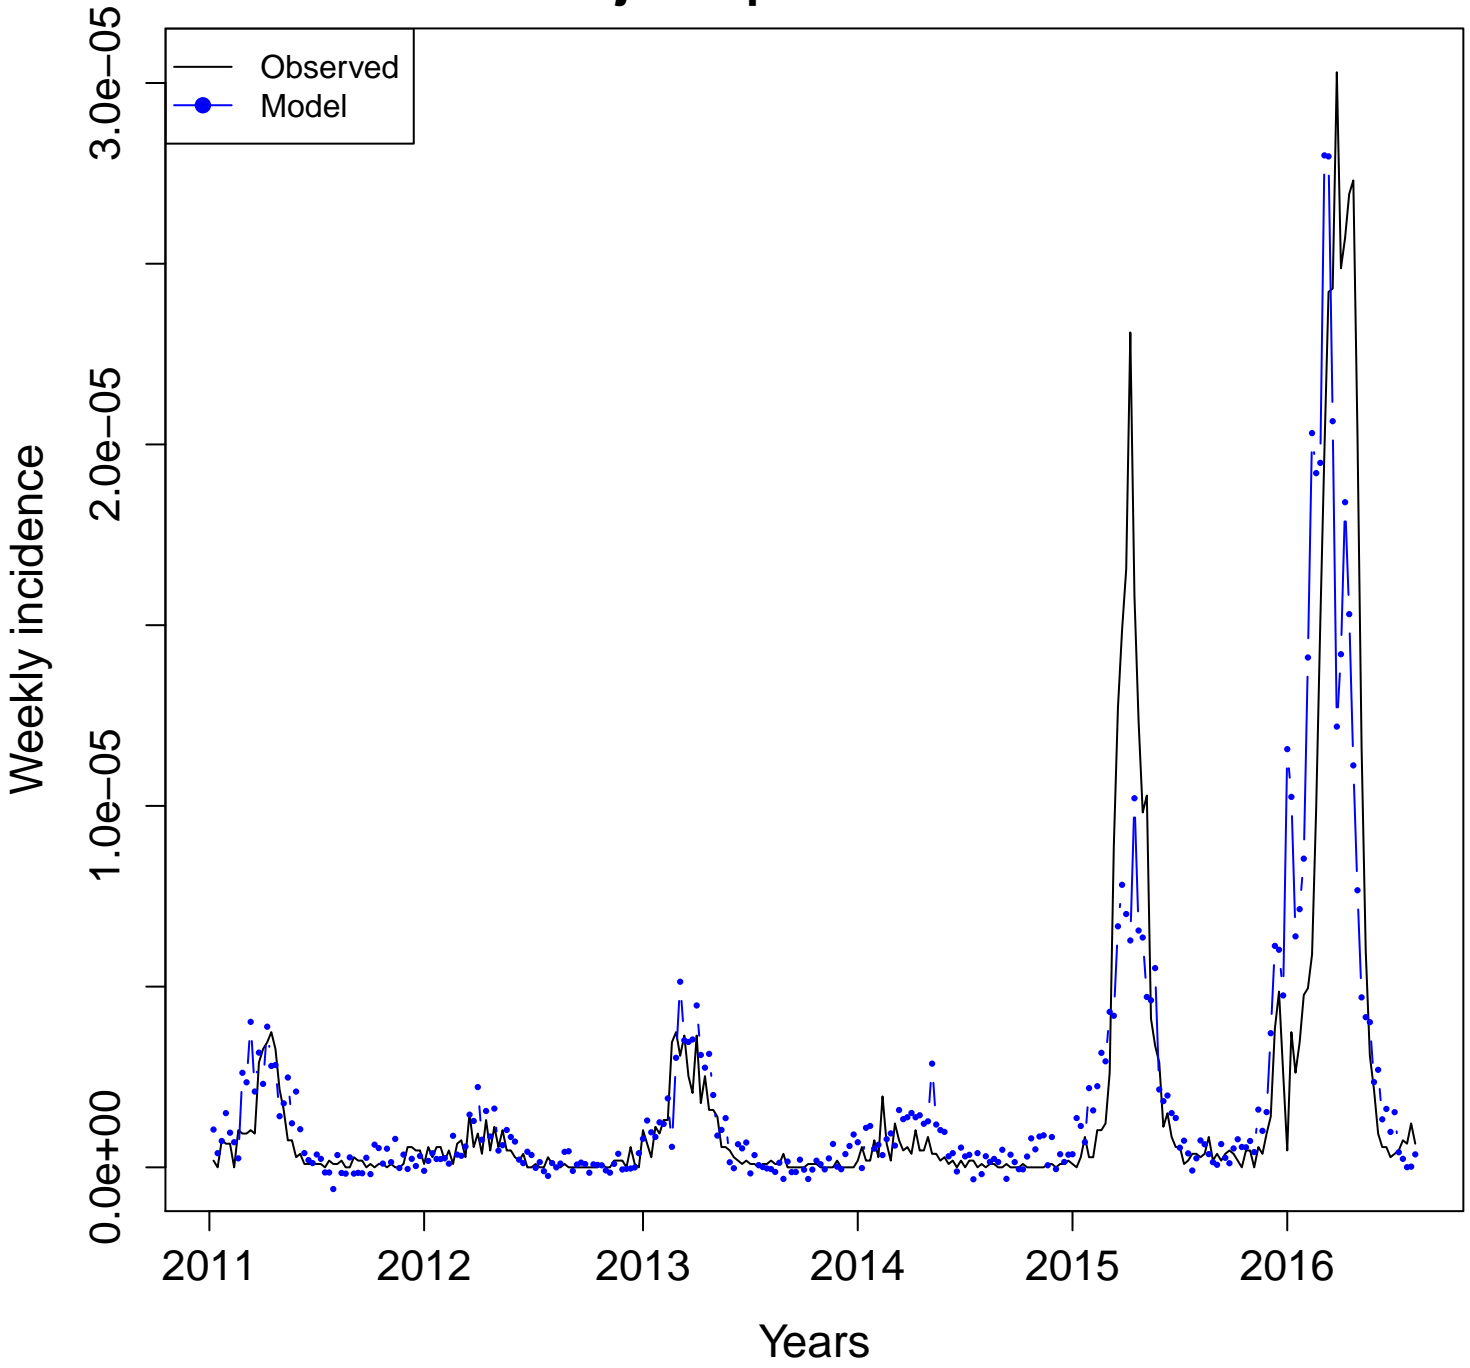

# RS- mosquito

Adj. R squared = 0.5738

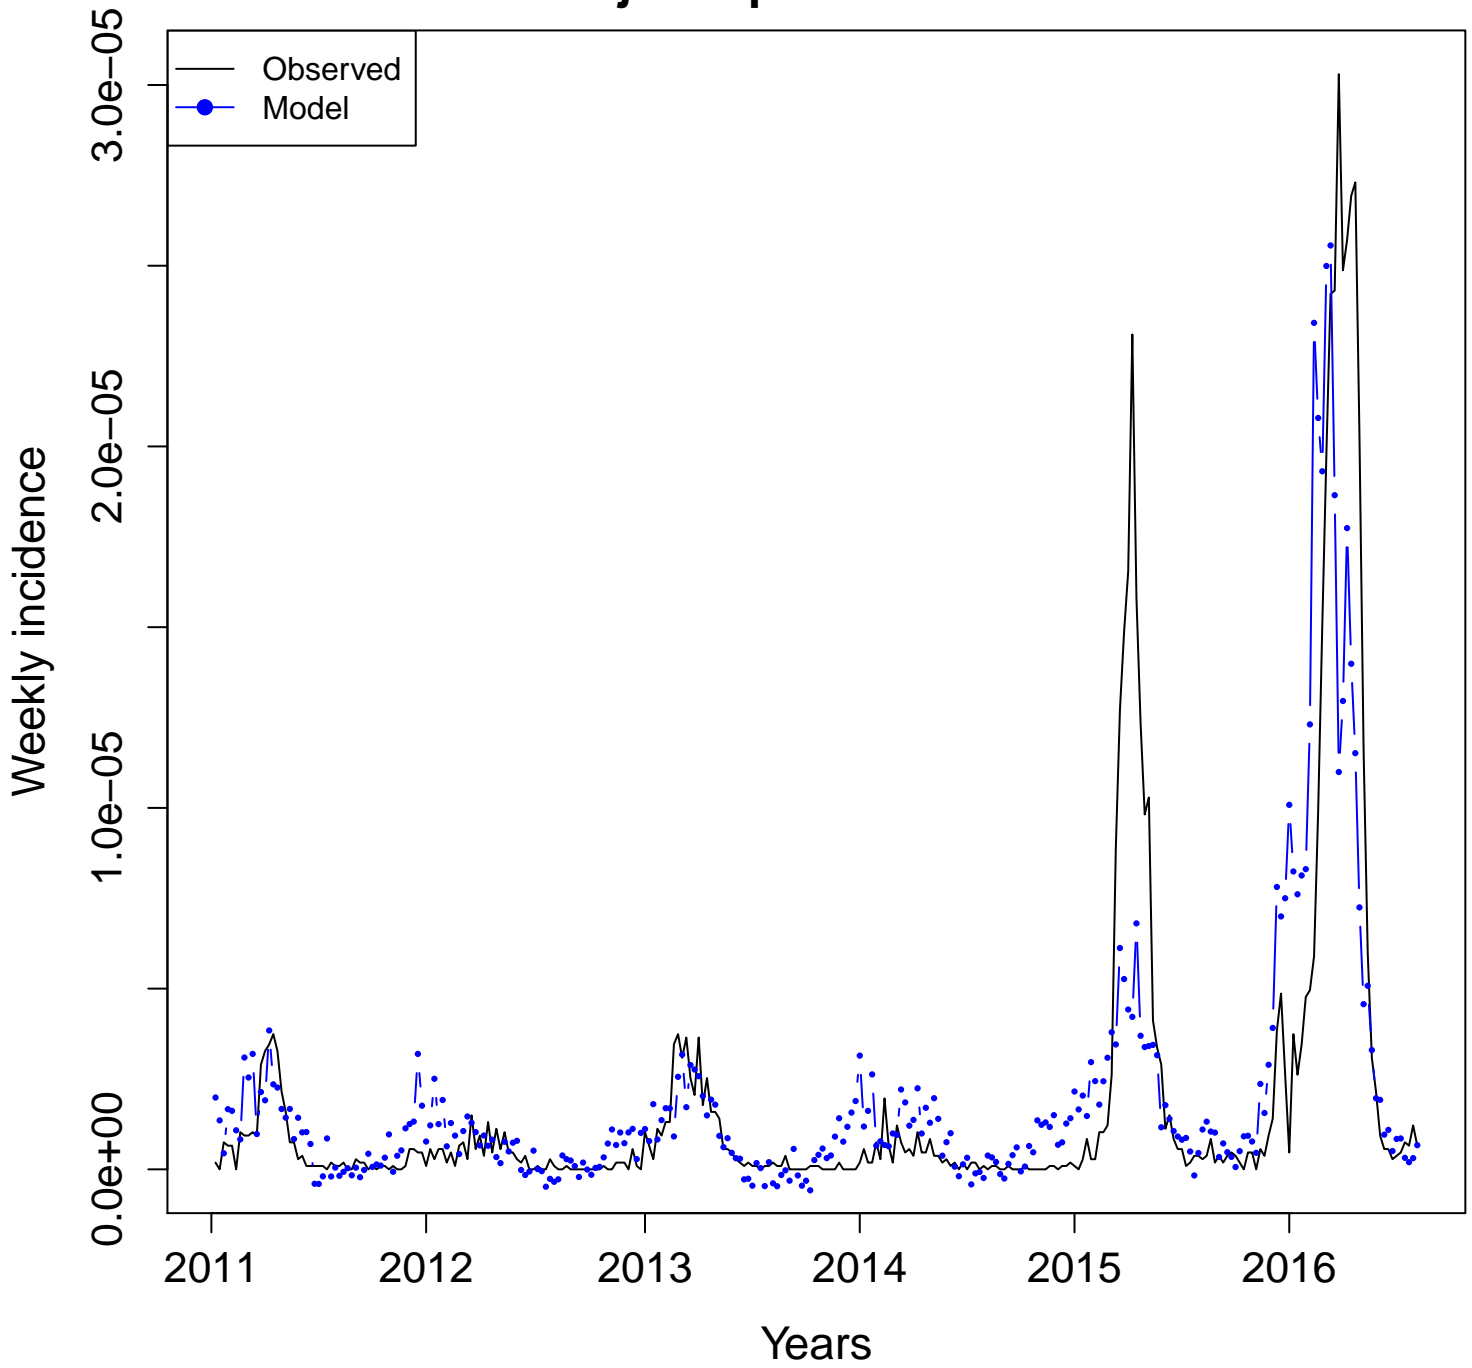

**RS- mosquitoes**  
**Adj. R squared = -0.0034**

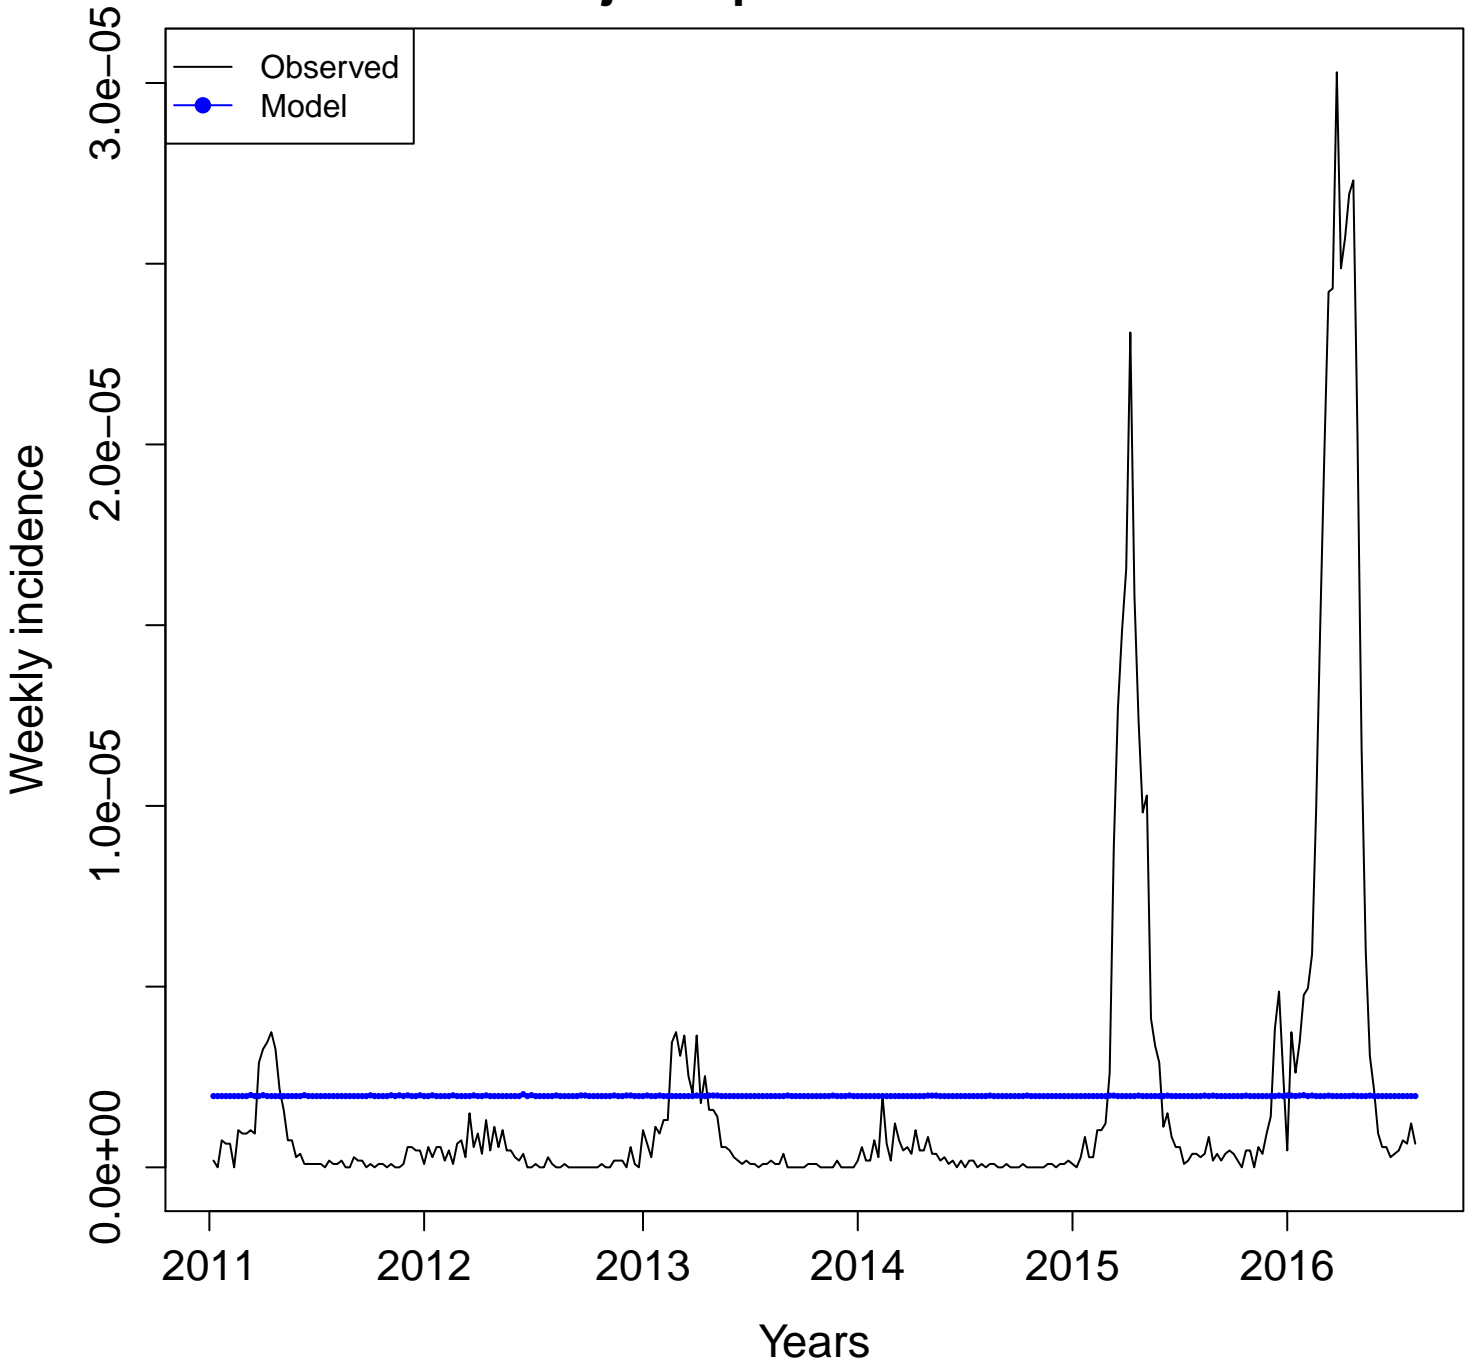



**RS- sintomas.da.dengue**  
**Adj. R squared = 0.7099**

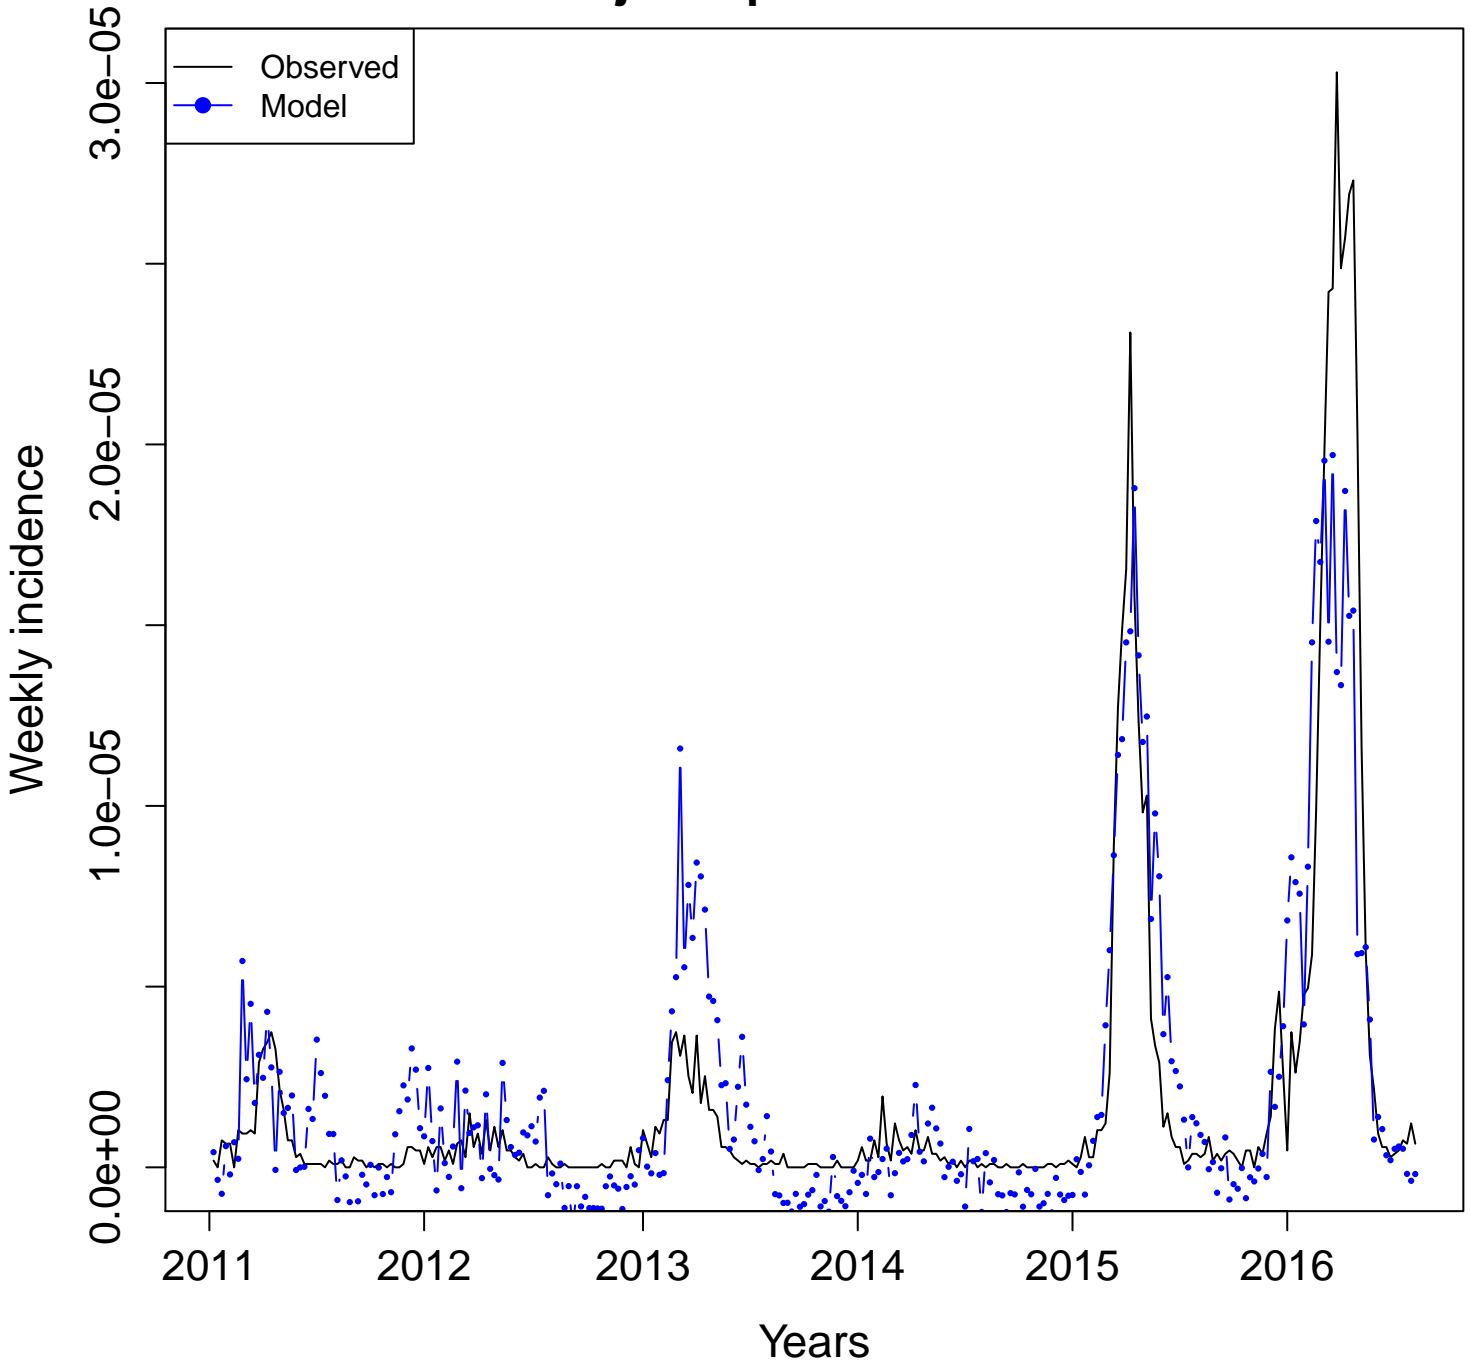

## Santa Catarina (SC)

# Dengue incidence vs. Google Health Trends (2011–2016)

### Definitions:

- **Combined terms:**
  - **All:** model with all the available terms.  $n =$  number of terms
  - **Four:** model with "dengue", "dengue sintomas", "aedes", and "mosquito".
  - **Uncorrelated:** model with non-correlated terms.  $n =$  number of uncorrelated terms
- **Individual terms:** Plots developed with one term at a time.
- Terms for all and uncorrelated models can be found in additional file 3.

**Combined terms**  
**Adjusted R squared**

**Santa Catarina (SC)**

All  
(n = 9)

BR-SC  
Adj. R squared = 0.8255

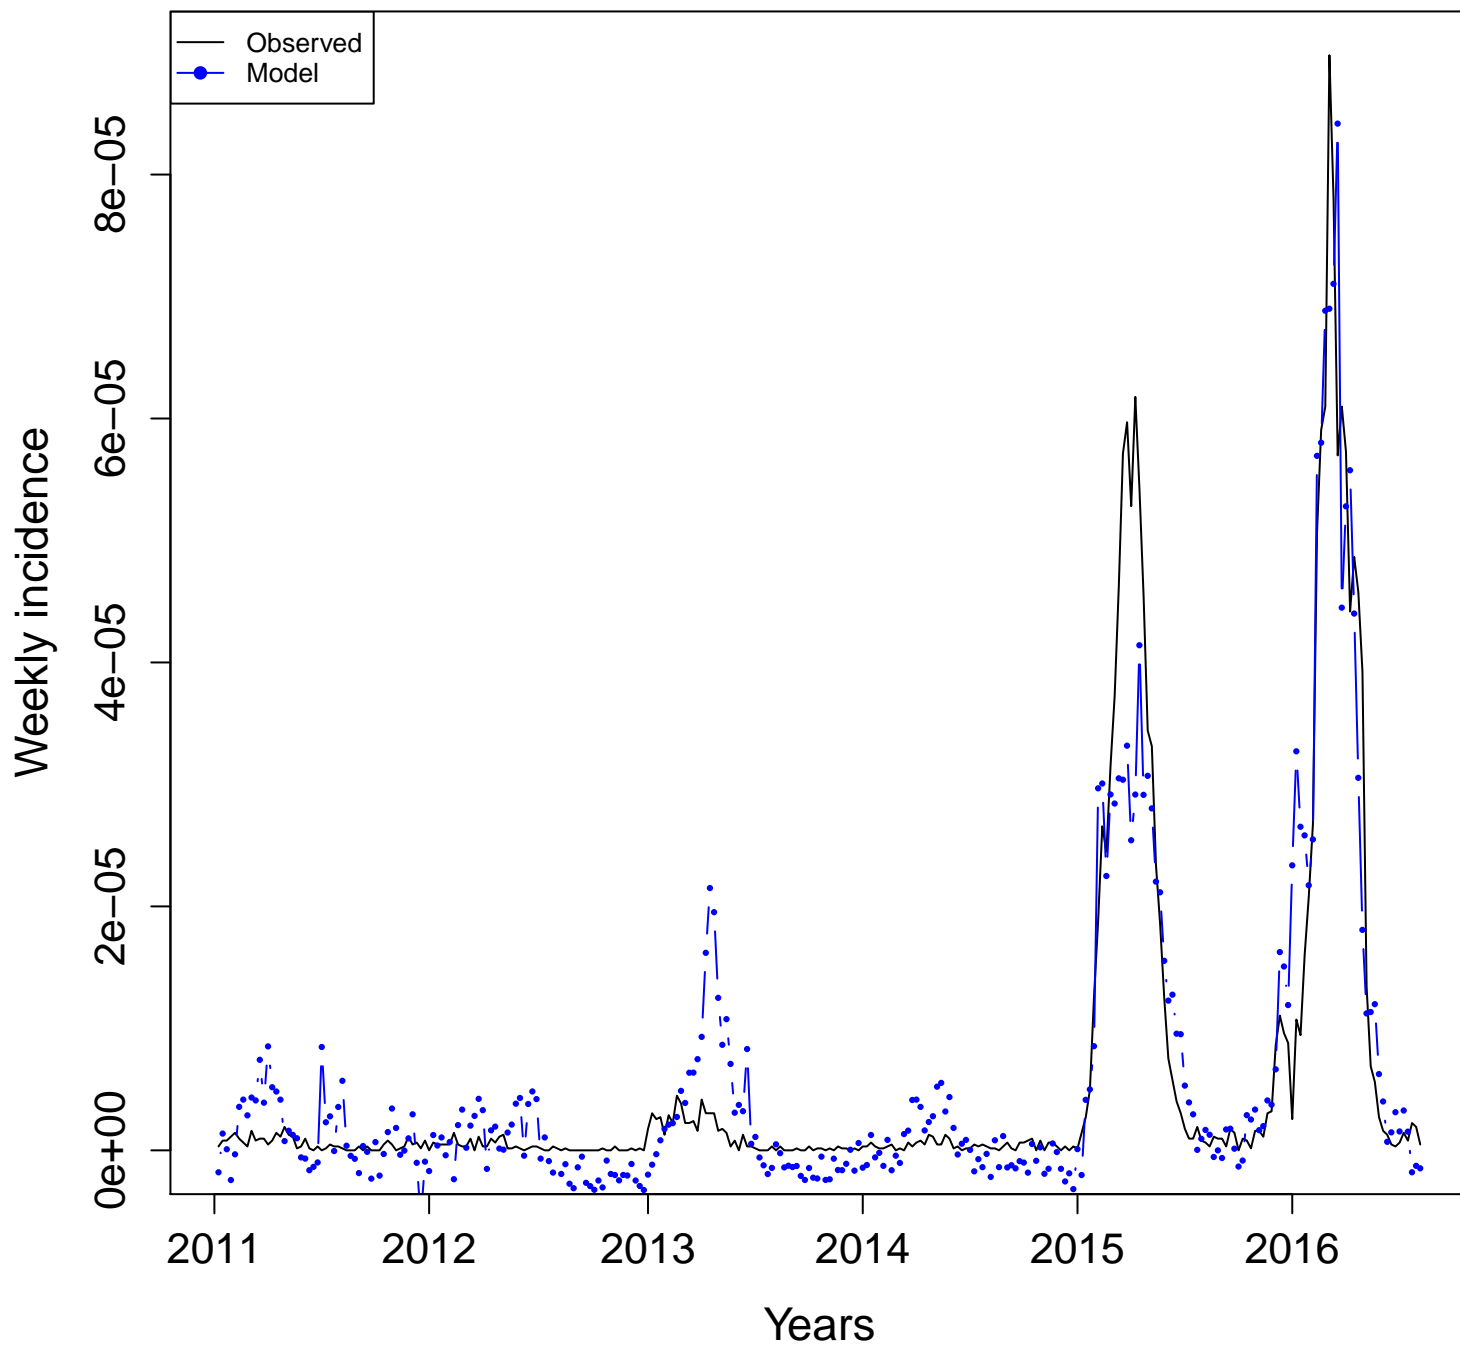

**BR-SC**  
**Adj. R squared = 0.8248**

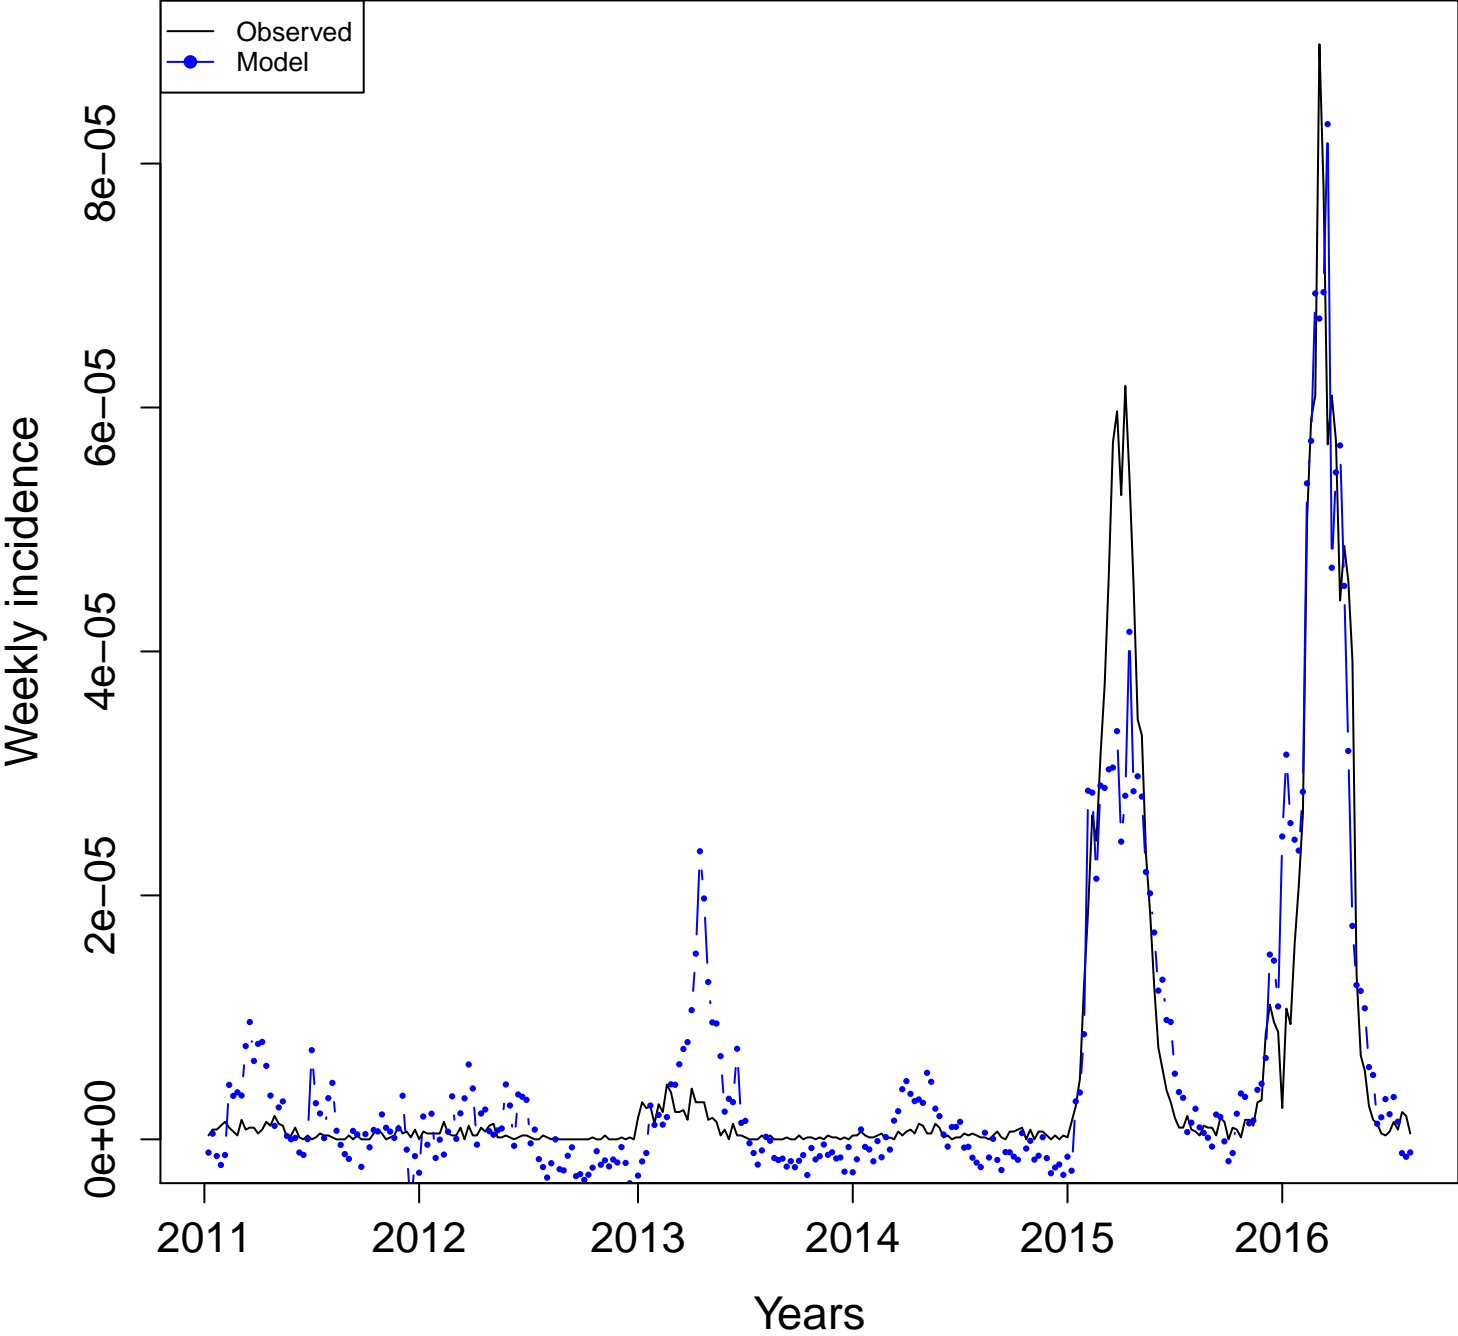

**Uncorrelated  
(n = 2)**

**BR-SC  
Adj. R squared = 0.7878**

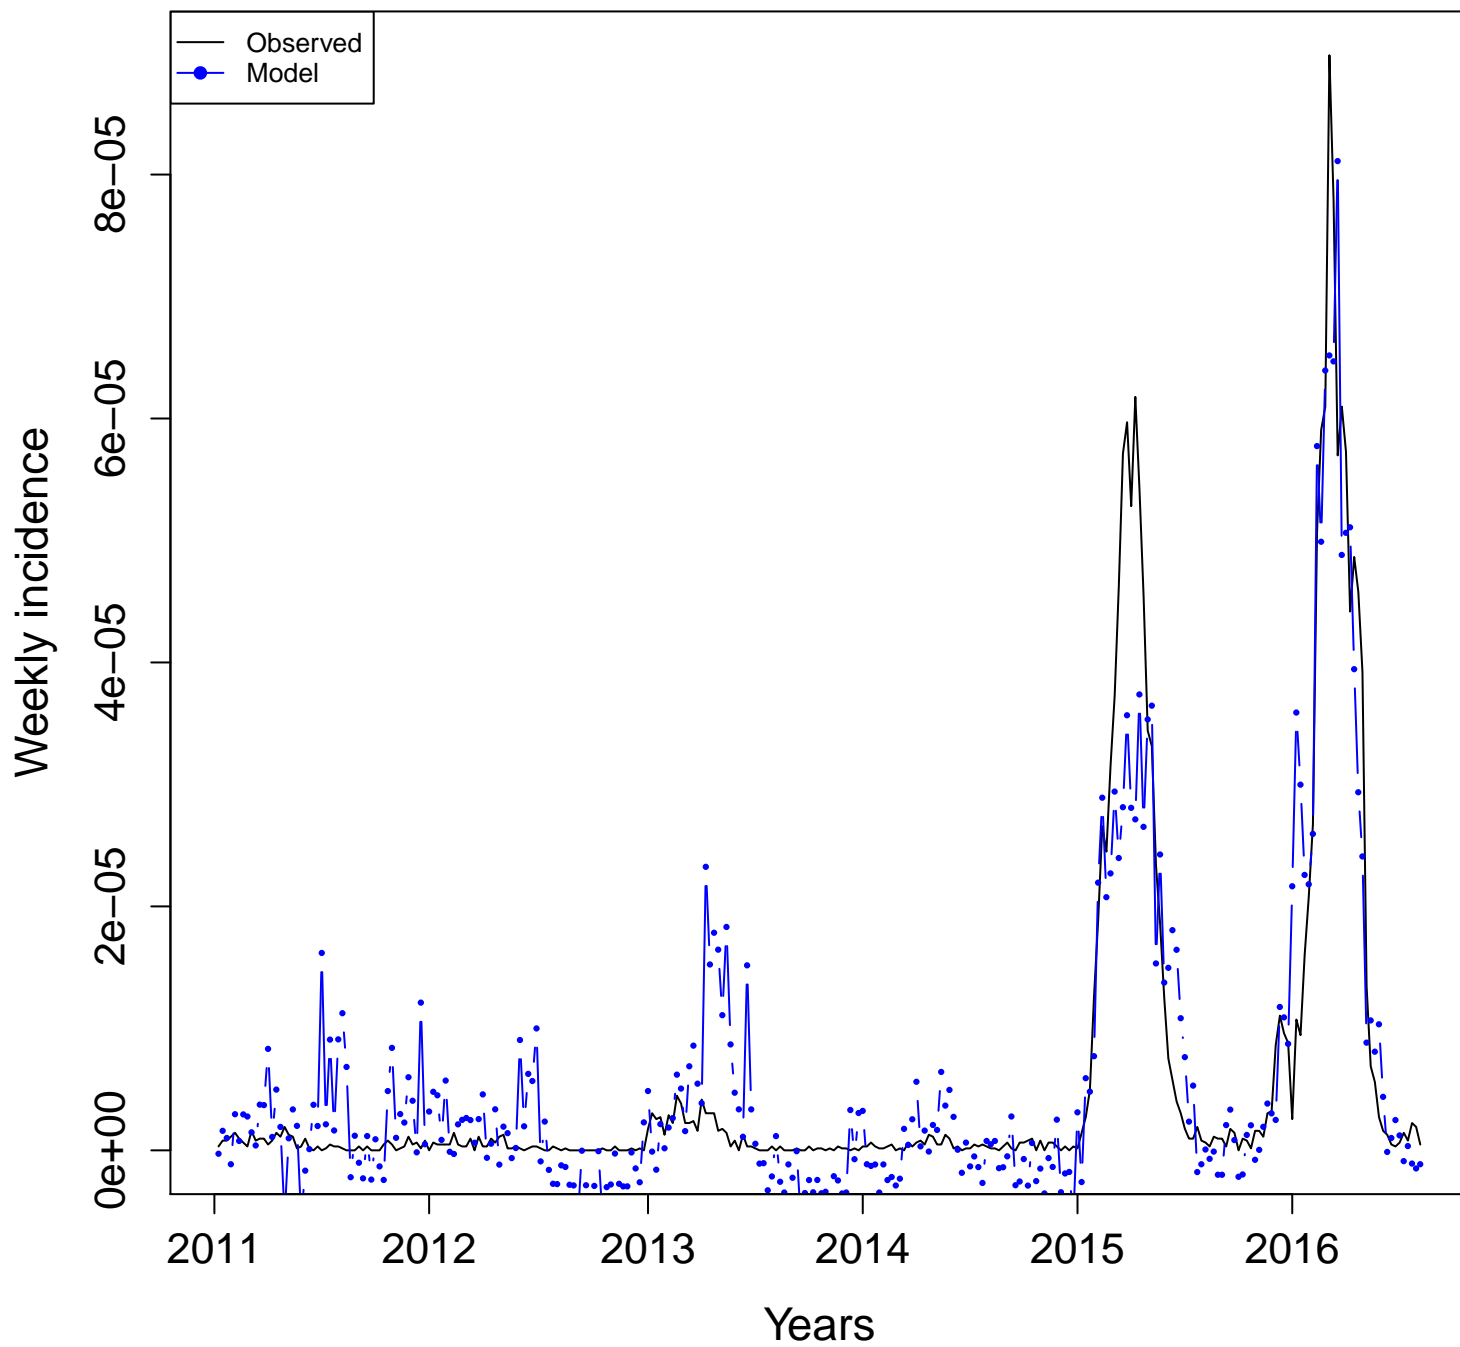

**Individual terms**  
**Adjusted R squared**

**Santa Catarina (SC)**

**SC- aedes.aegypti**  
**Adj. R squared = 0.5592**

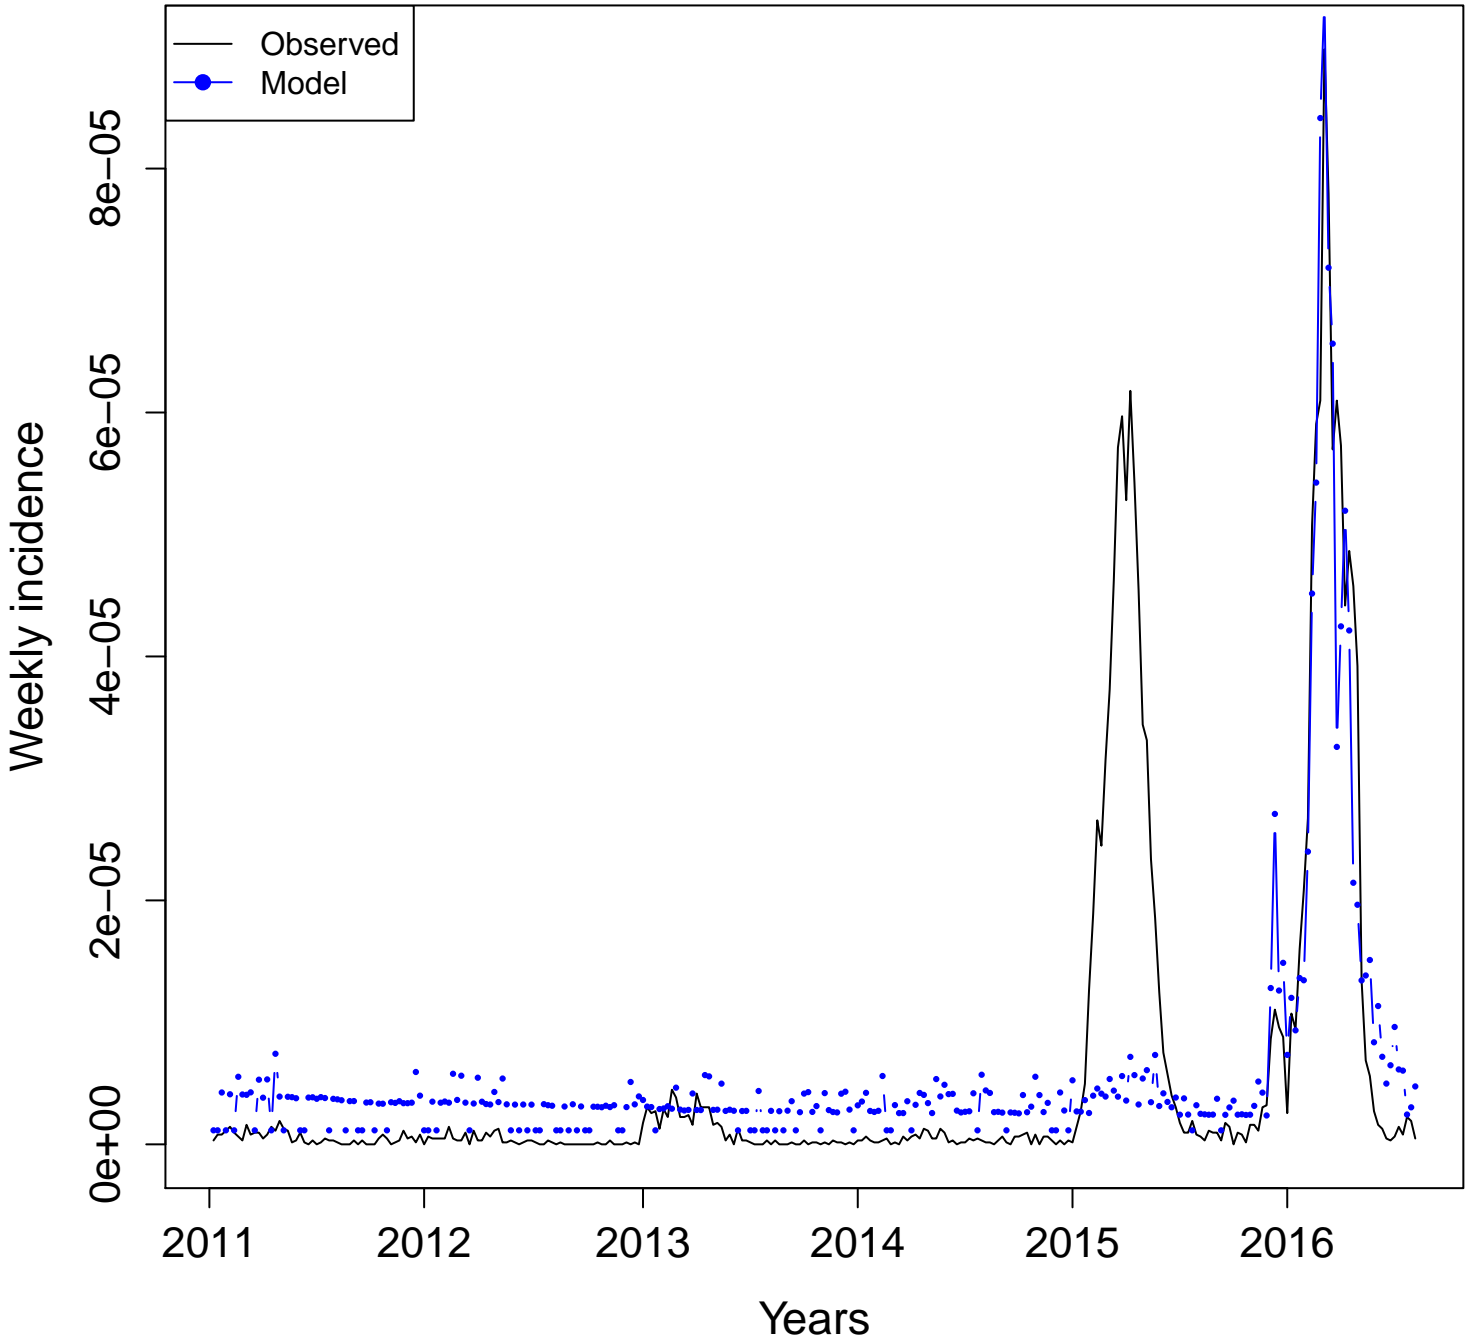



# SC- aedes

Adj. R squared = 0.5644

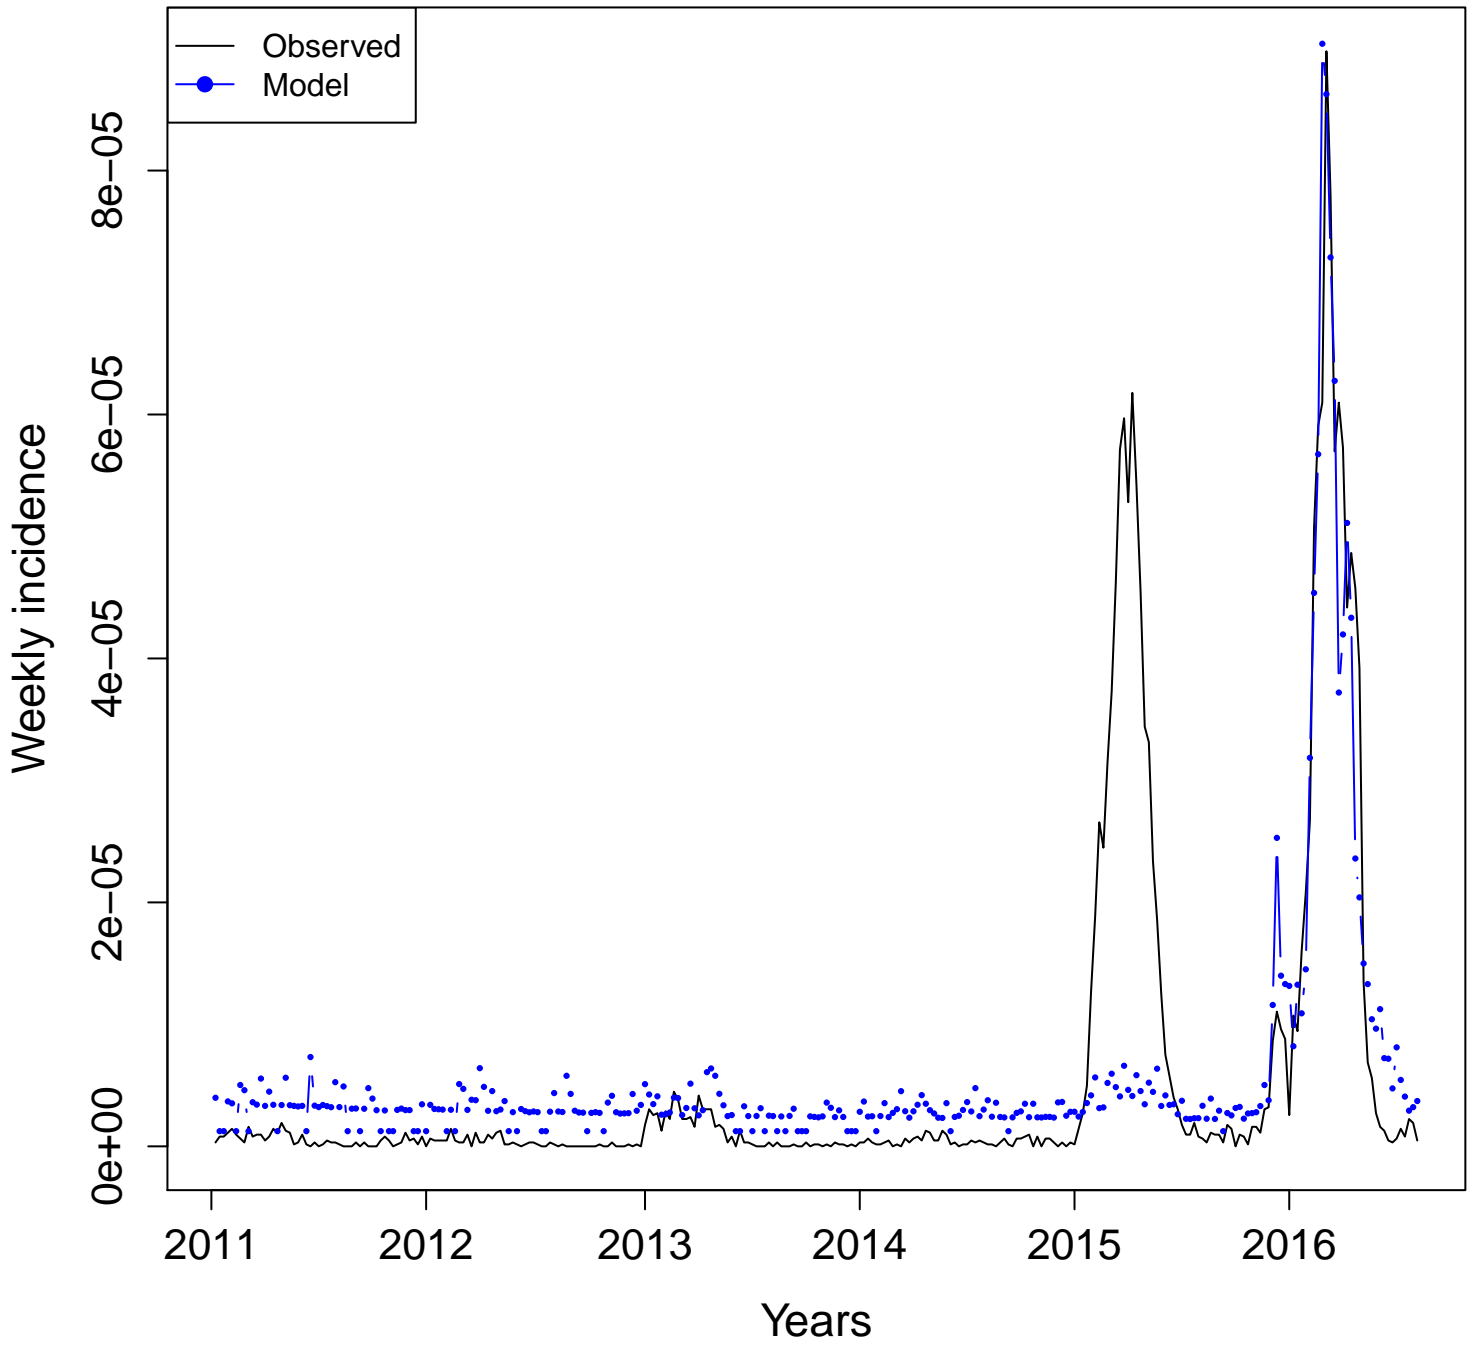

# SC- aegypti

Adj. R squared = 0.5583

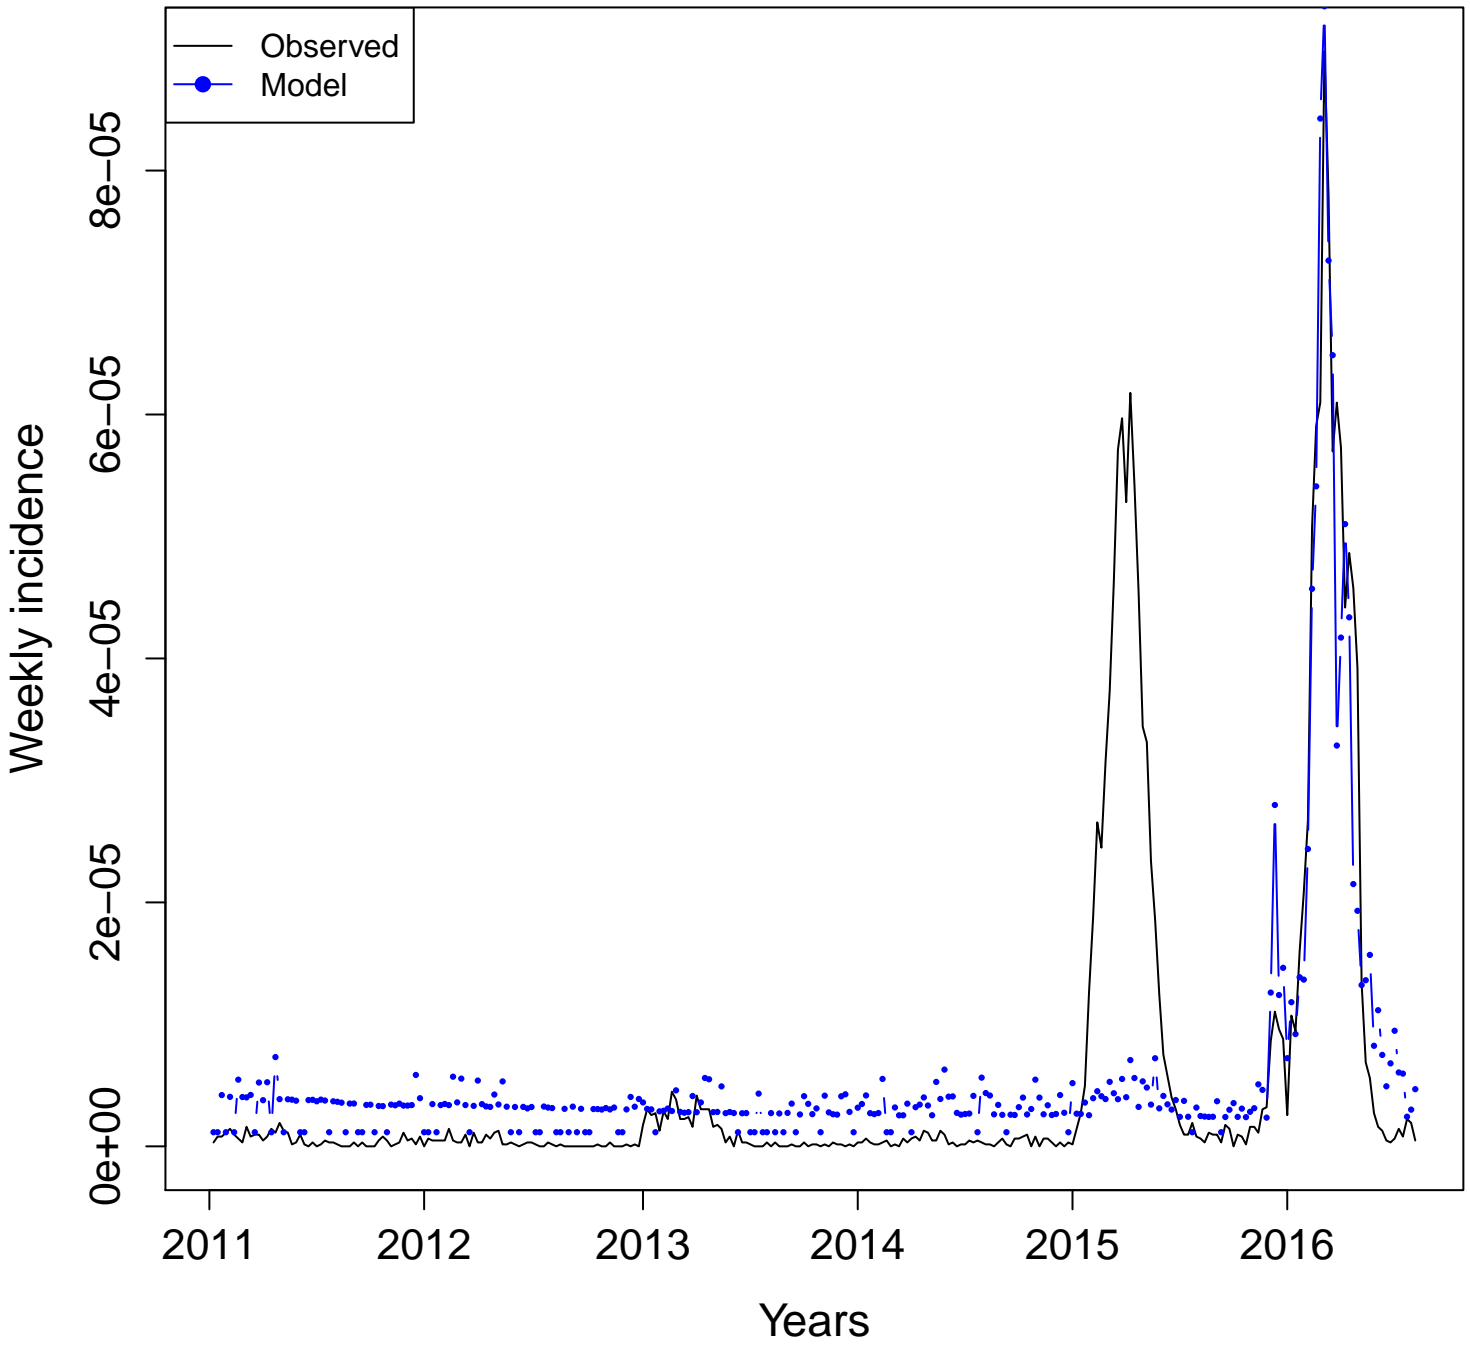

# SC- dengue

Adj. R squared = 0.8032

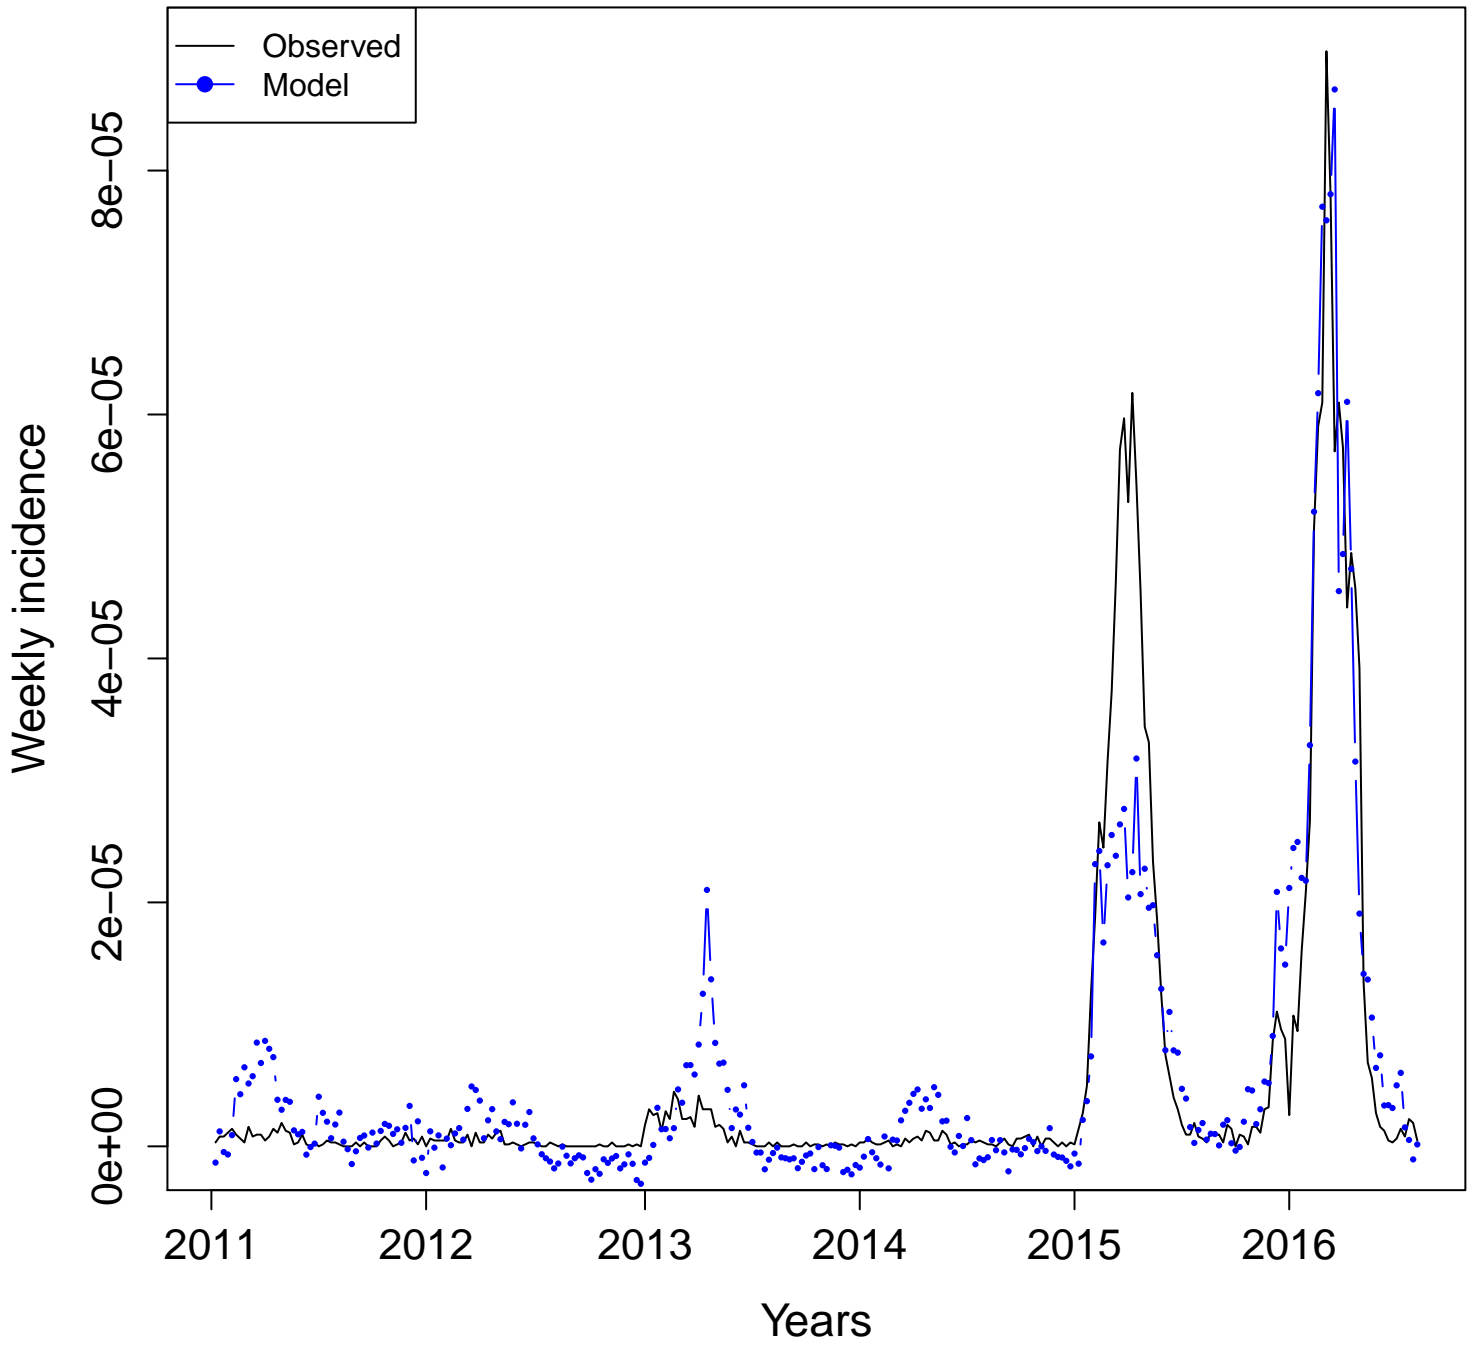

**SC- dengue.sintomas**  
**Adj. R squared = 0.8105**

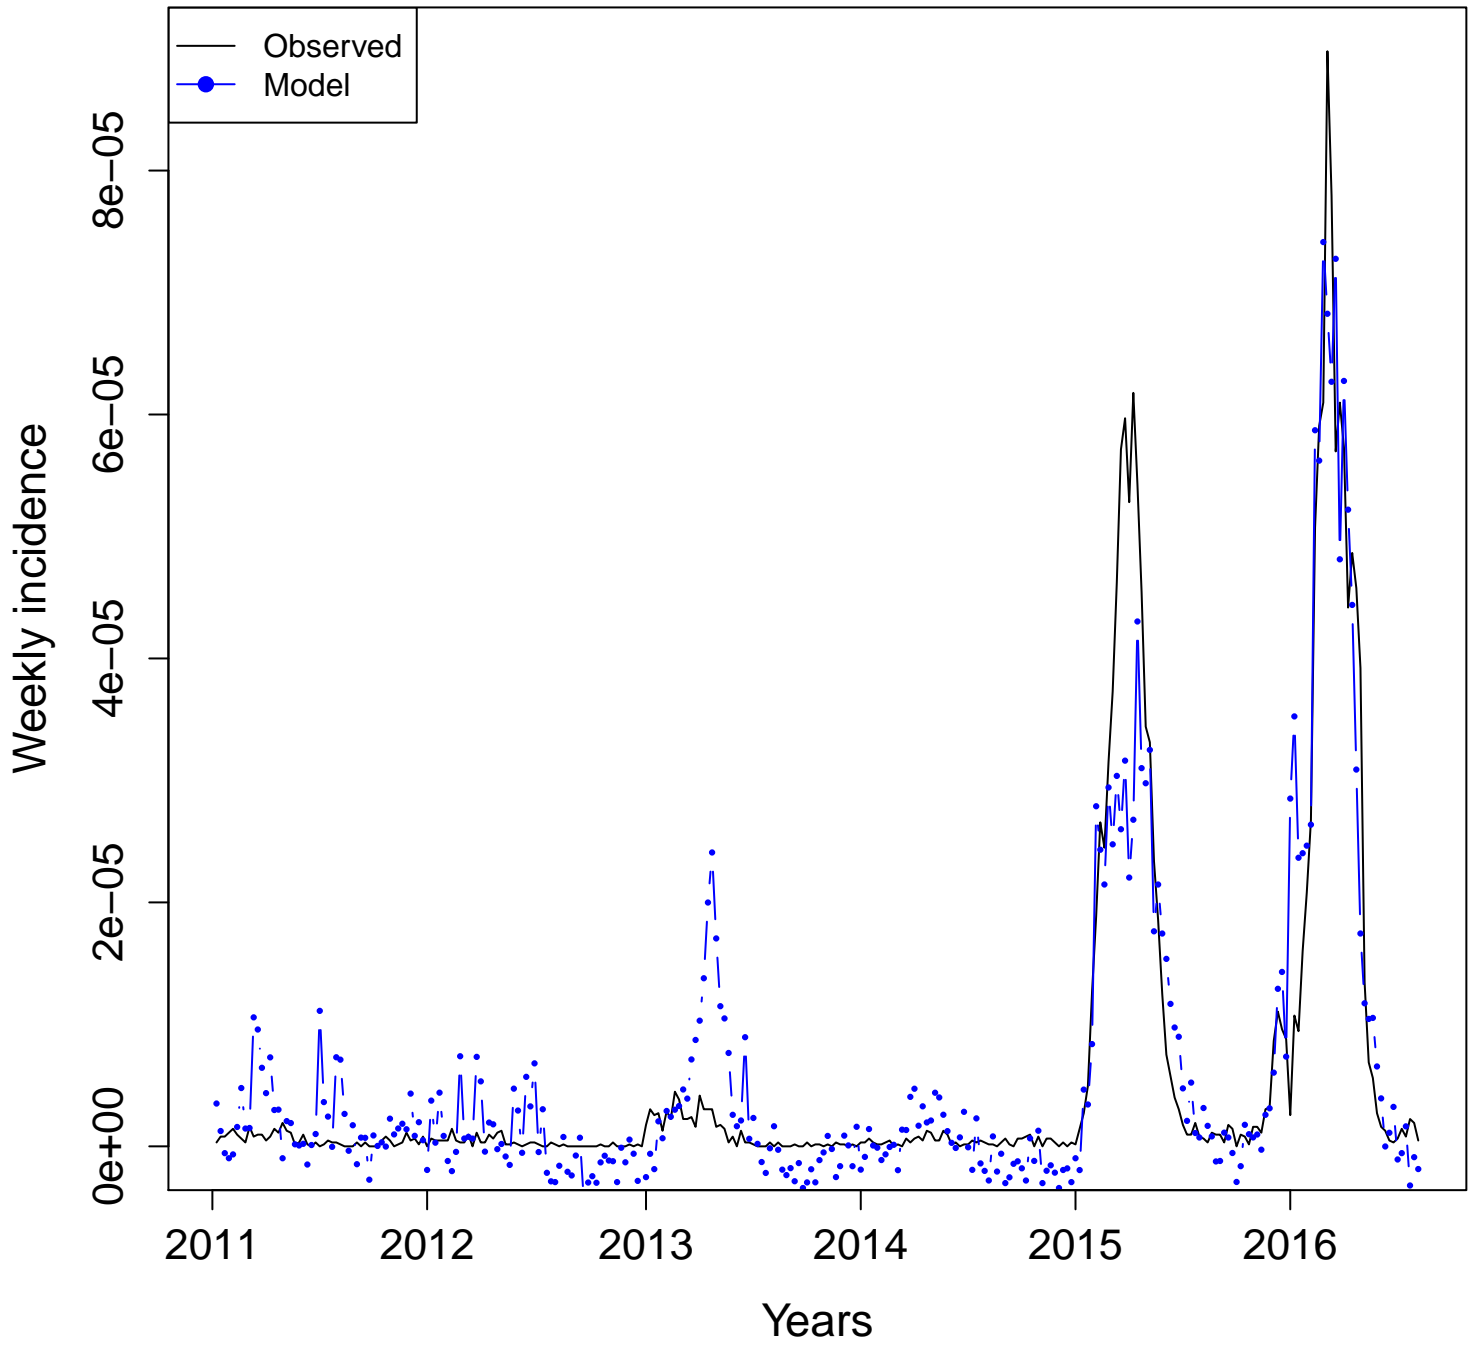

# SC- dengue.virus

Adj. R squared = 0.5382

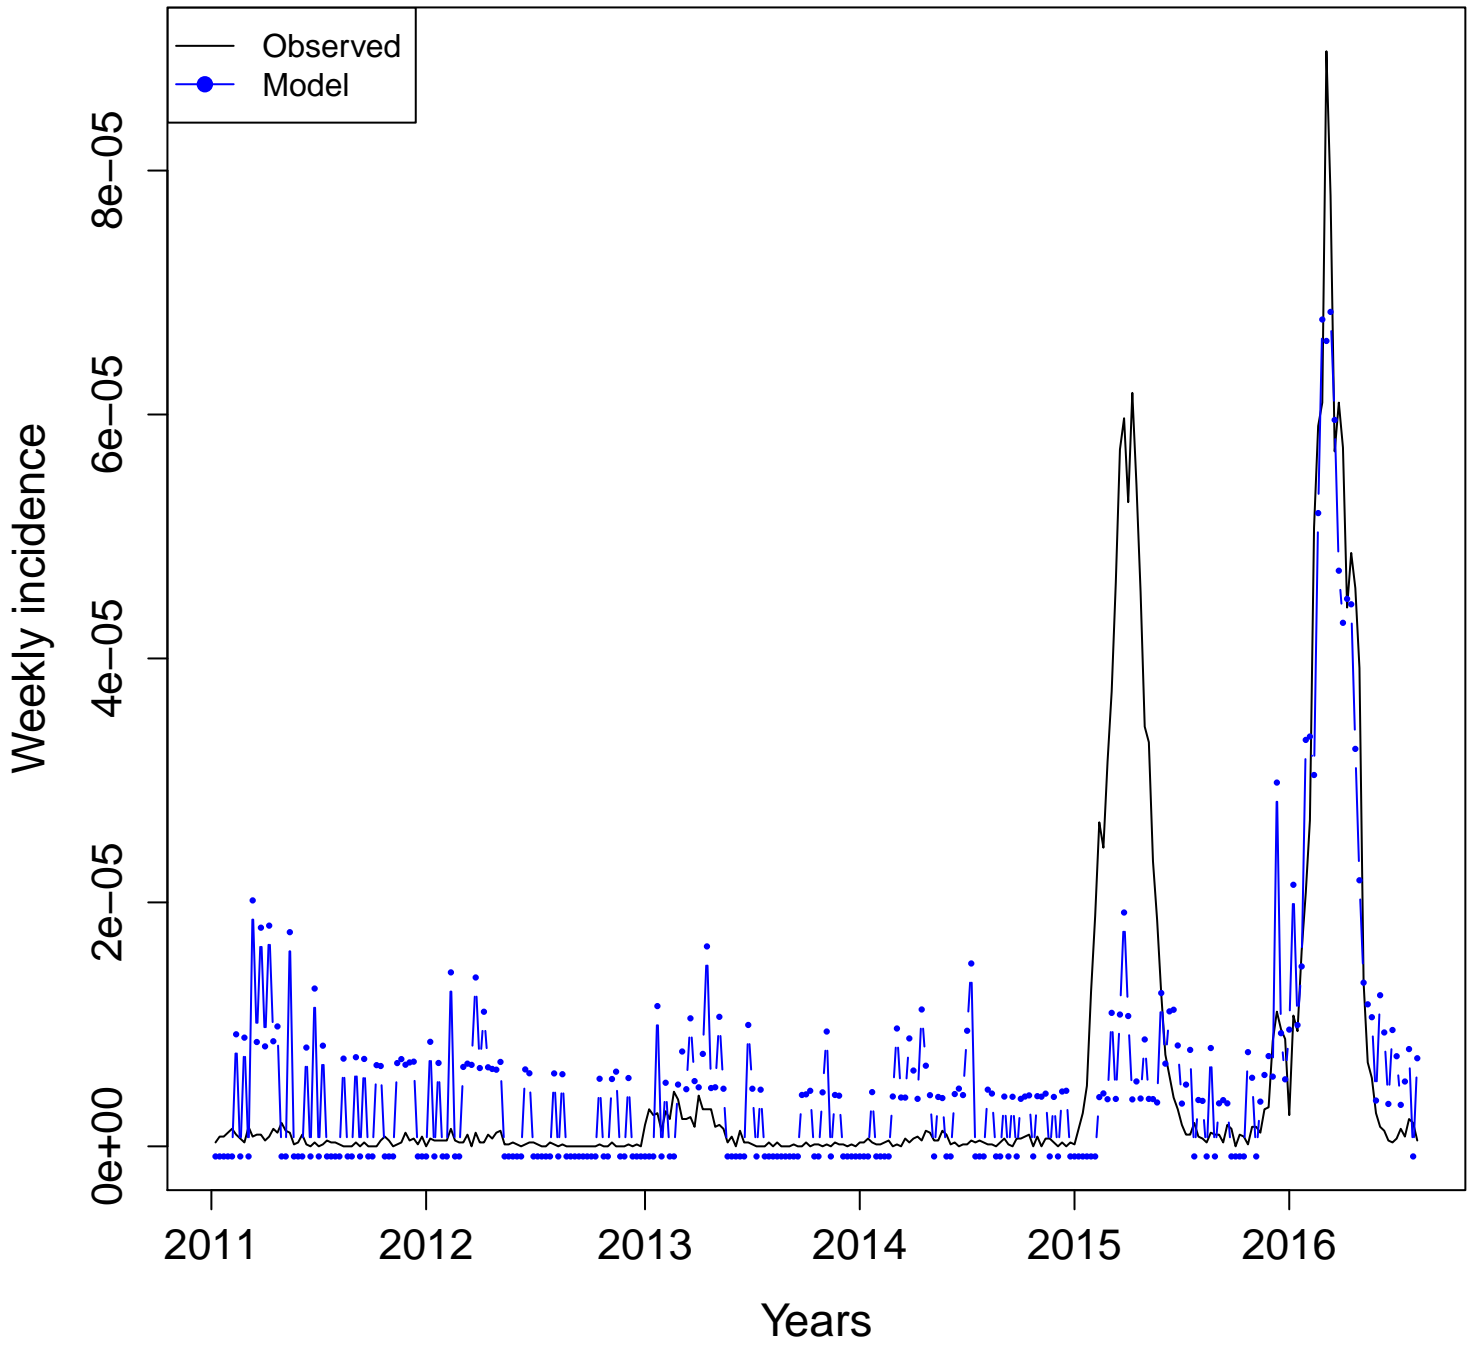

**SC- mosquito.dengue**  
**Adj. R squared = 0.733**

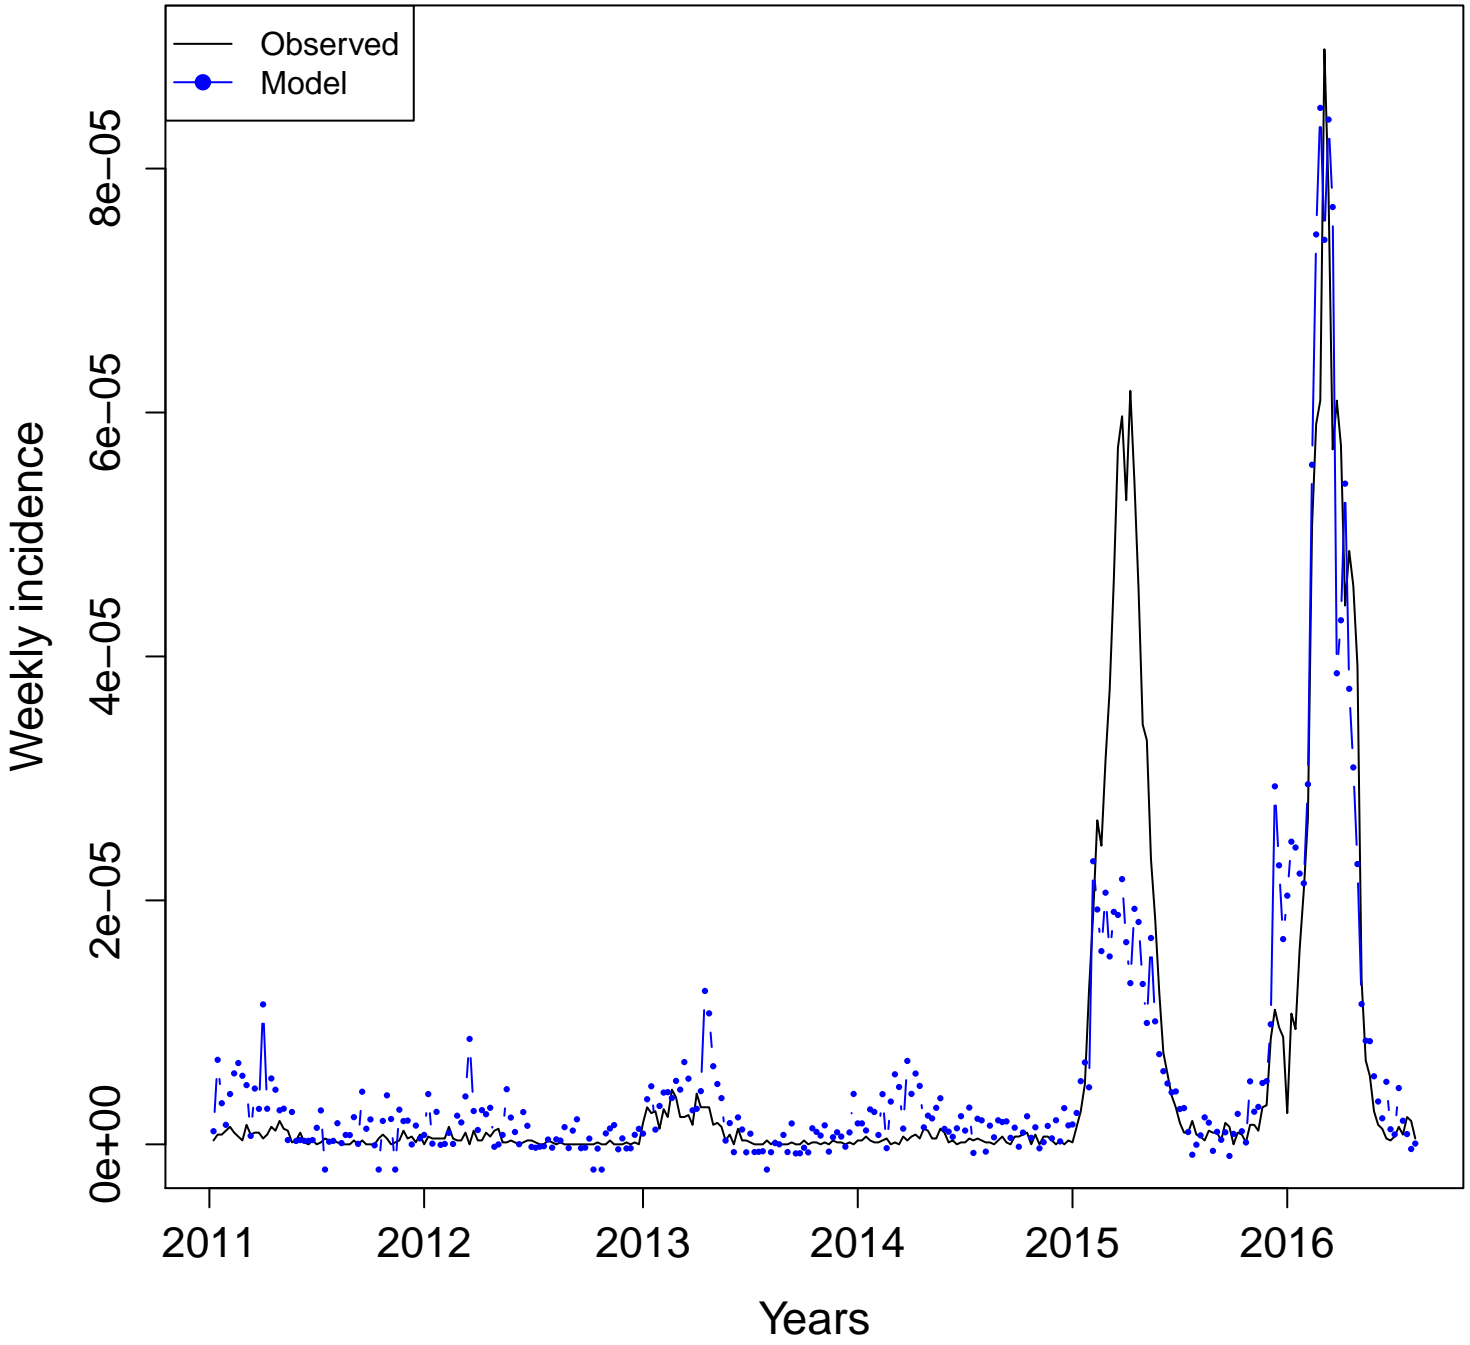

# SC- mosquito

Adj. R squared = 0.3641

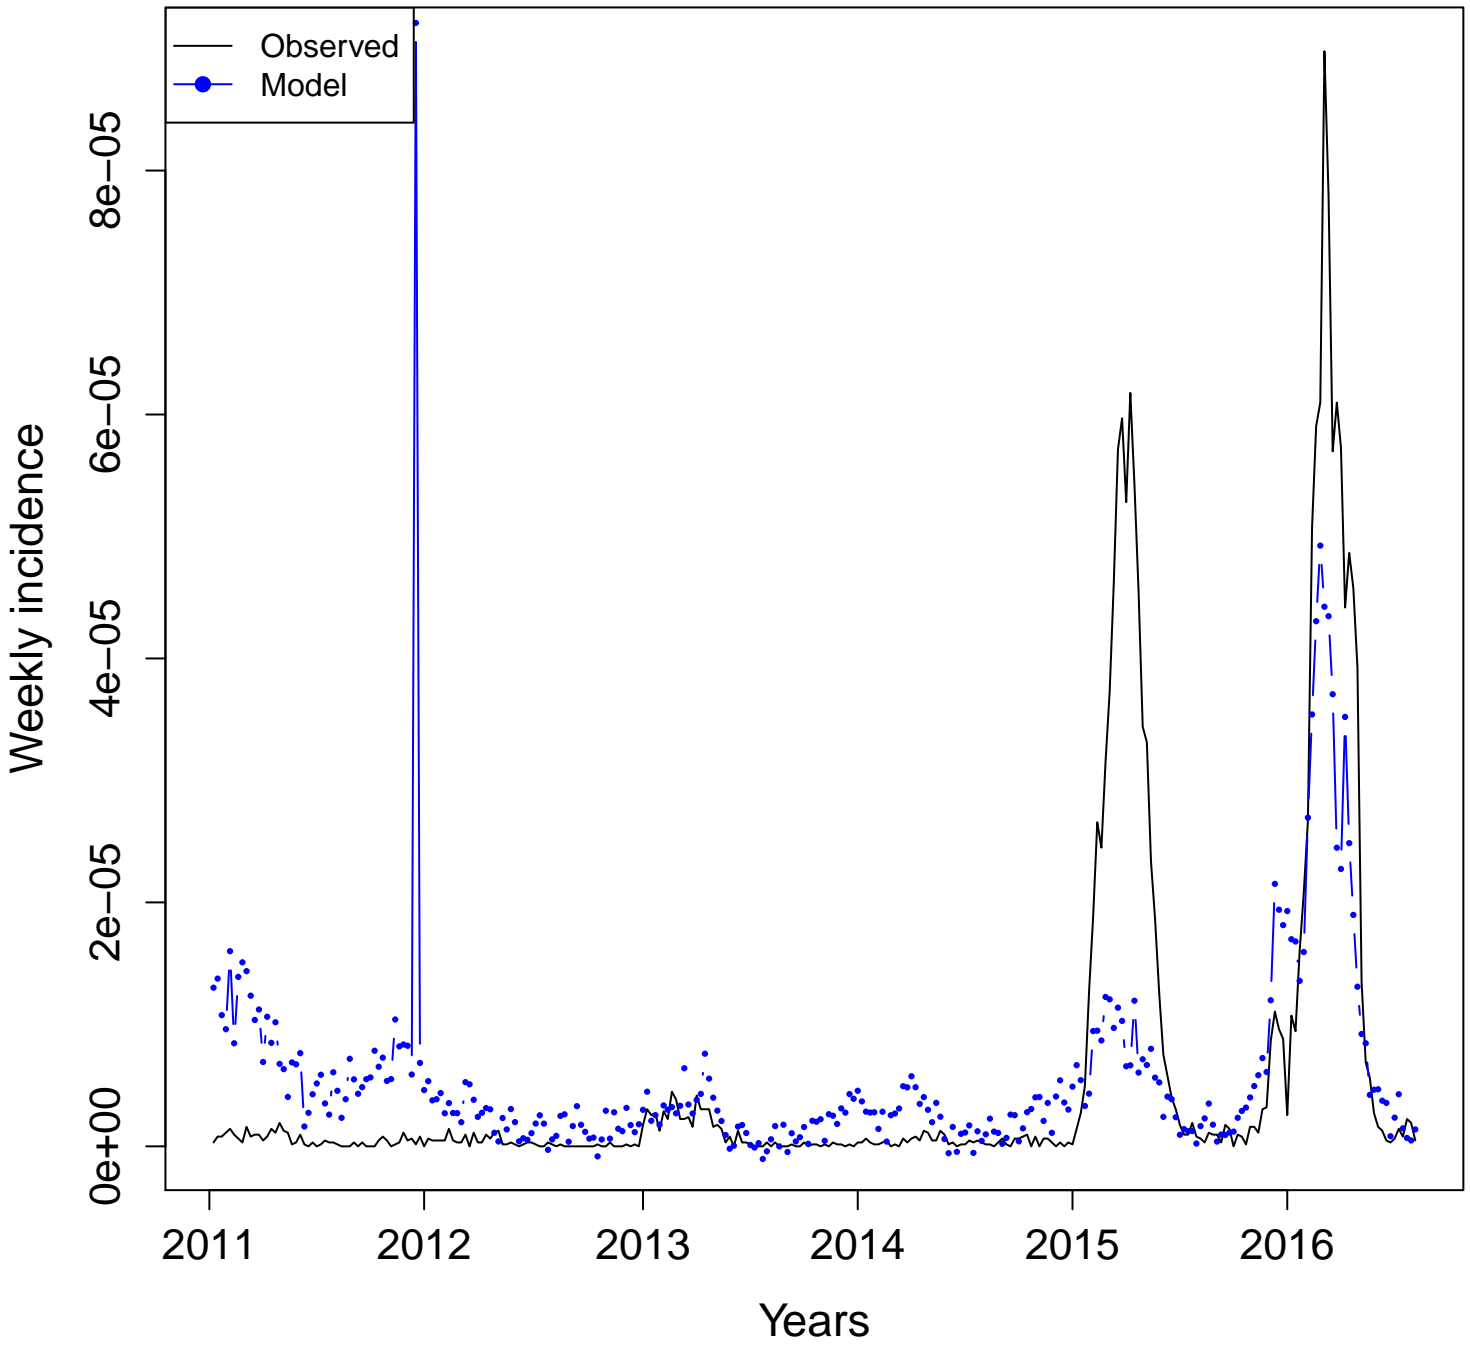

**SC- sintomas.da.dengue**  
**Adj. R squared = 0.7884**

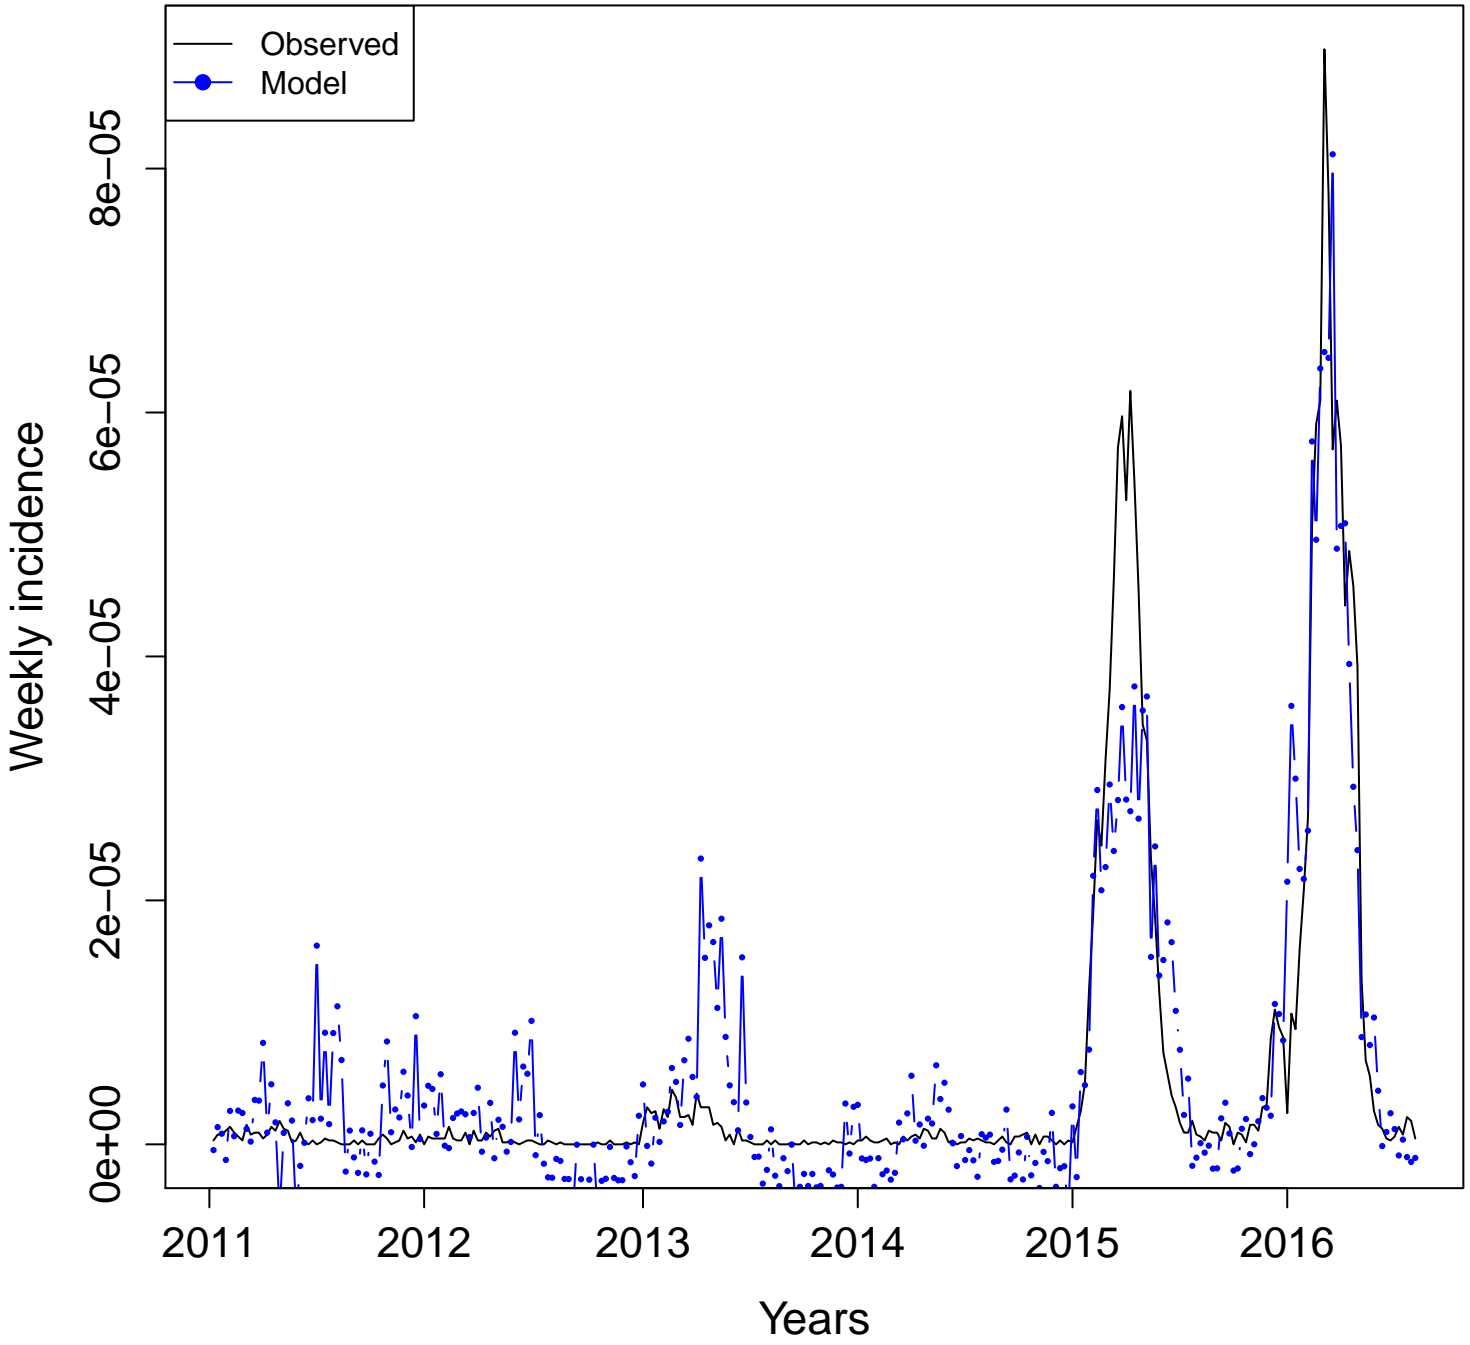



## Sergipe (SE)

# Dengue incidence vs. Google Health Trends (2011–2016)

### Definitions:

- **Combined terms:**
  - **All:** model with all the available terms.  $n$  = number of terms
  - **Four:** model with "dengue", "dengue sintomas", "aedes", and "mosquito".
  - **Uncorrelated:** model with non-correlated terms.  $n$  = number of uncorrelated terms
- **Individual terms:** Plots developed with one term at a time.
- Terms for all and uncorrelated models can be found in additional file 3.

**Combined terms**  
**Adjusted R squared**

**Sergipe (SE)**

**All**  
**(n = 8)**

**BR-SE**  
**Adj. R squared = 0.3085**

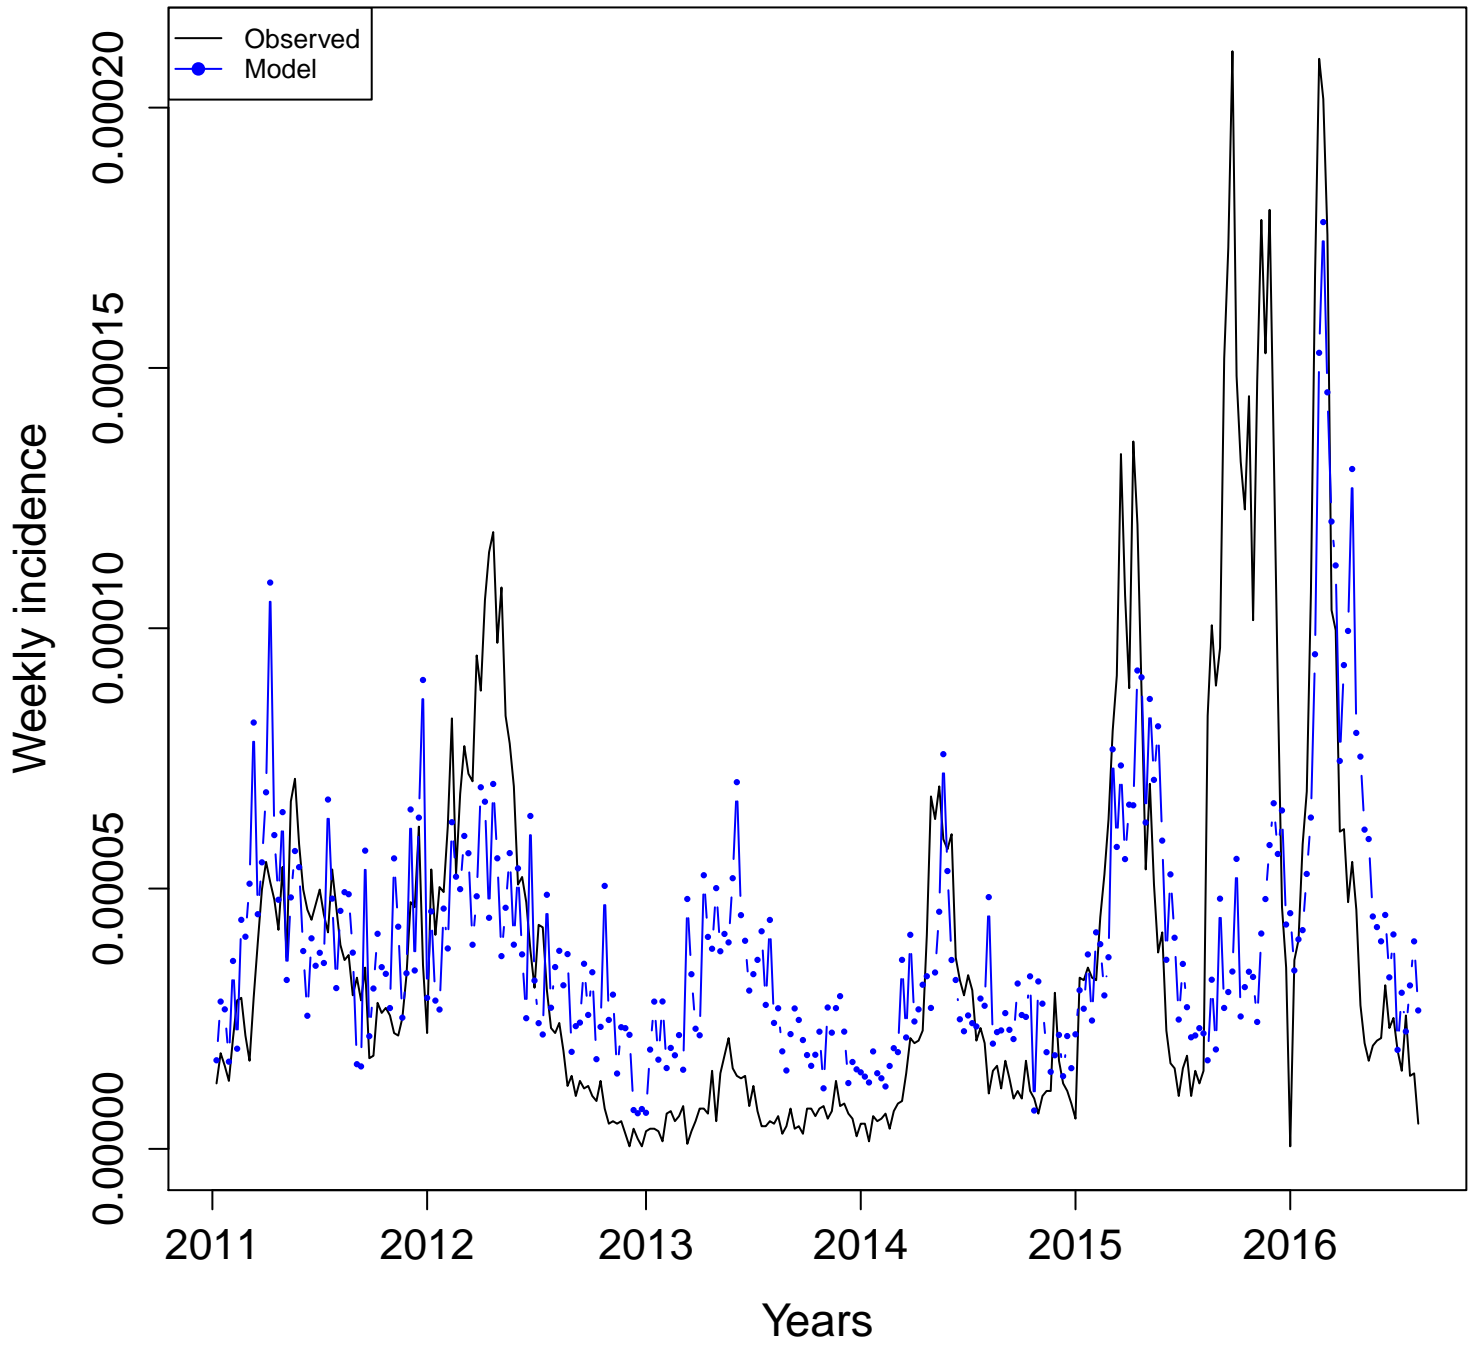

**BR-SE**  
**Adj. R squared = 0.3001**

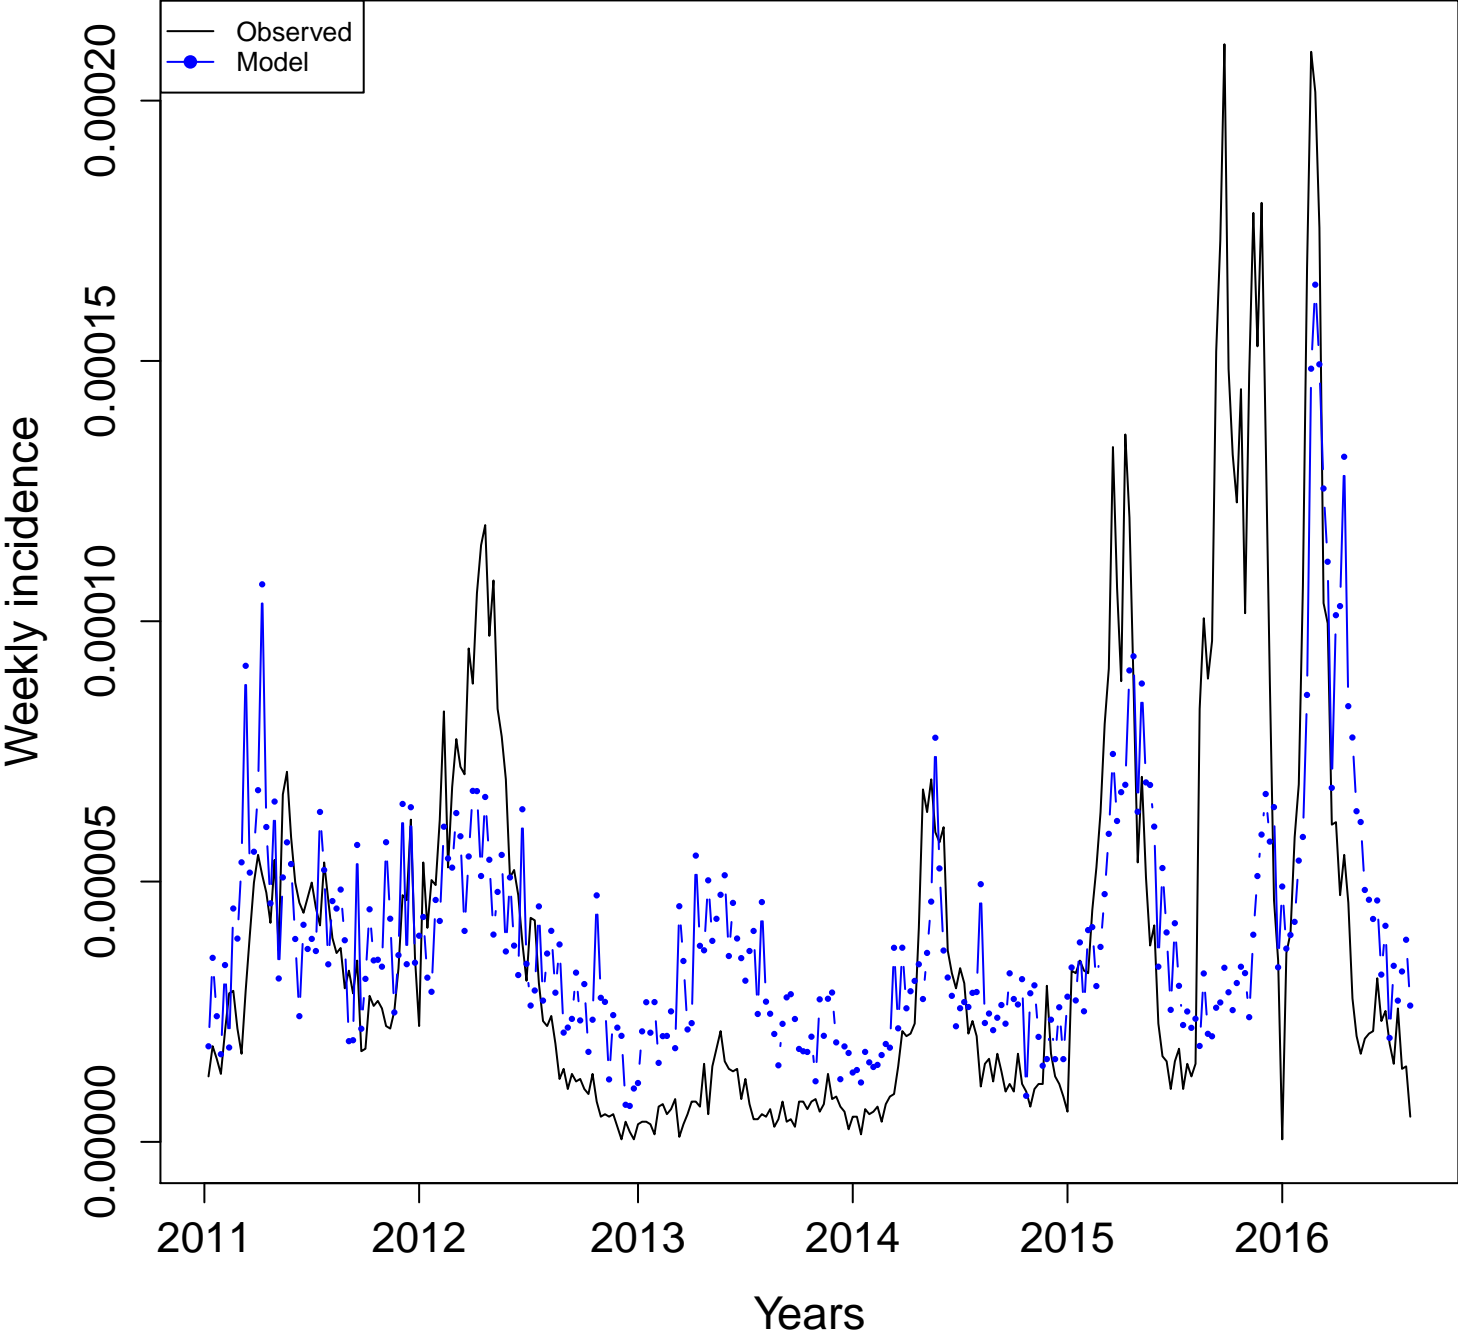

**Uncorrelated  
(n = 3)**

**BR-SE  
Adj. R squared = 0.2159**

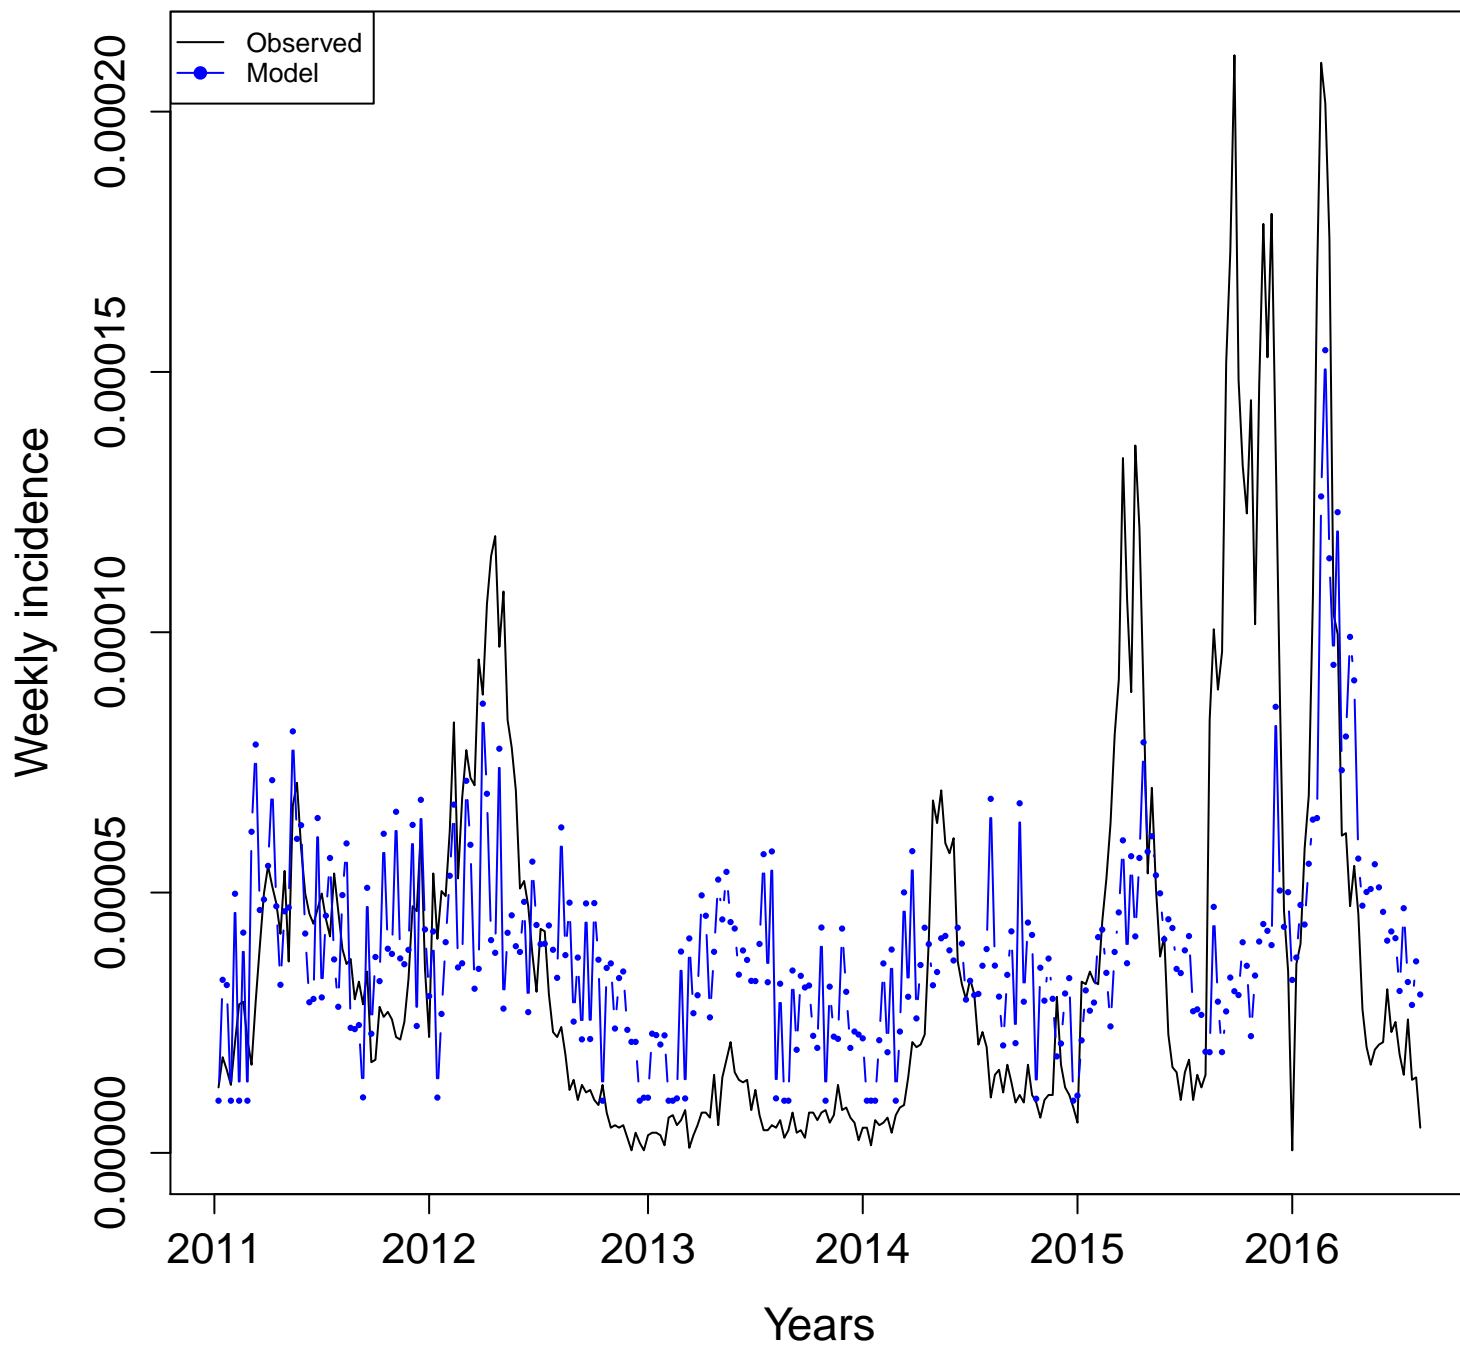

**Individual terms**  
**Adjusted R squared**

**Sergipe (SE)**

**SE- aedes.aegypti**  
**Adj. R squared = 0.1128**

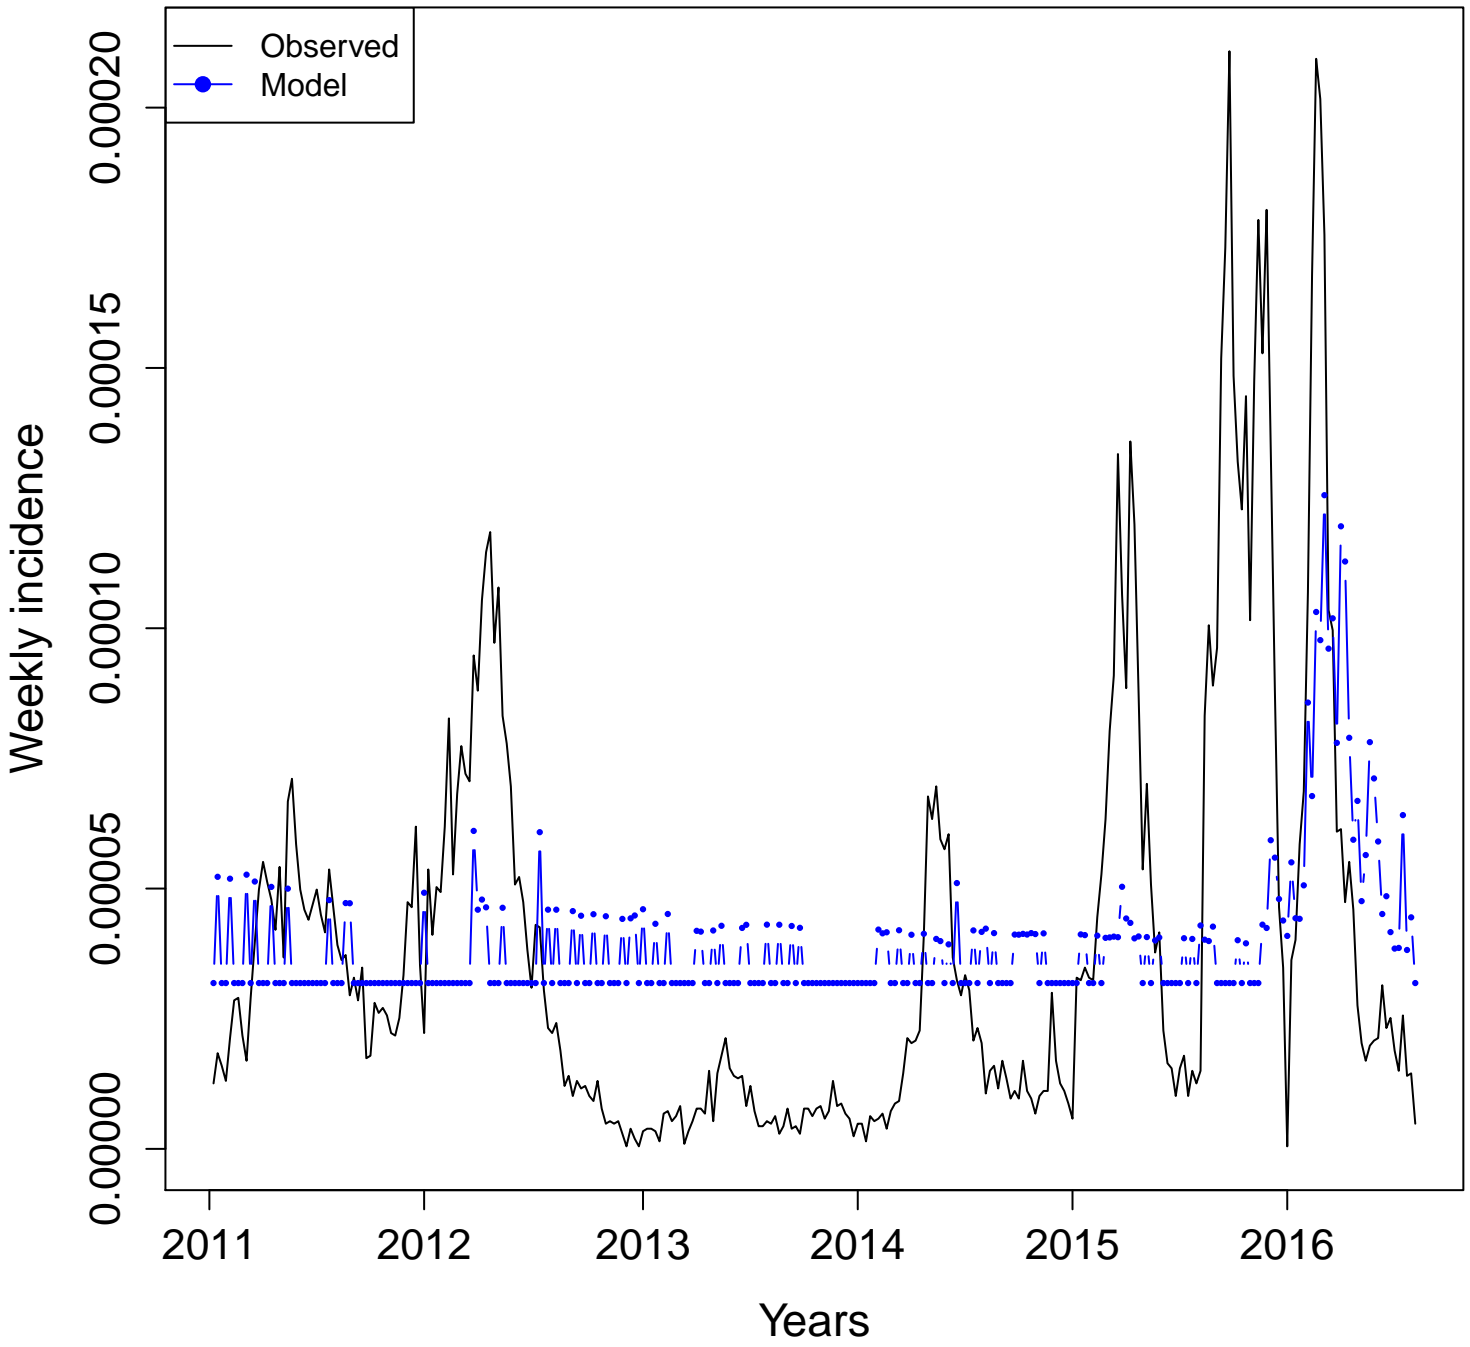

**SE- aedes**  
**Adj. R squared = 0.1265**

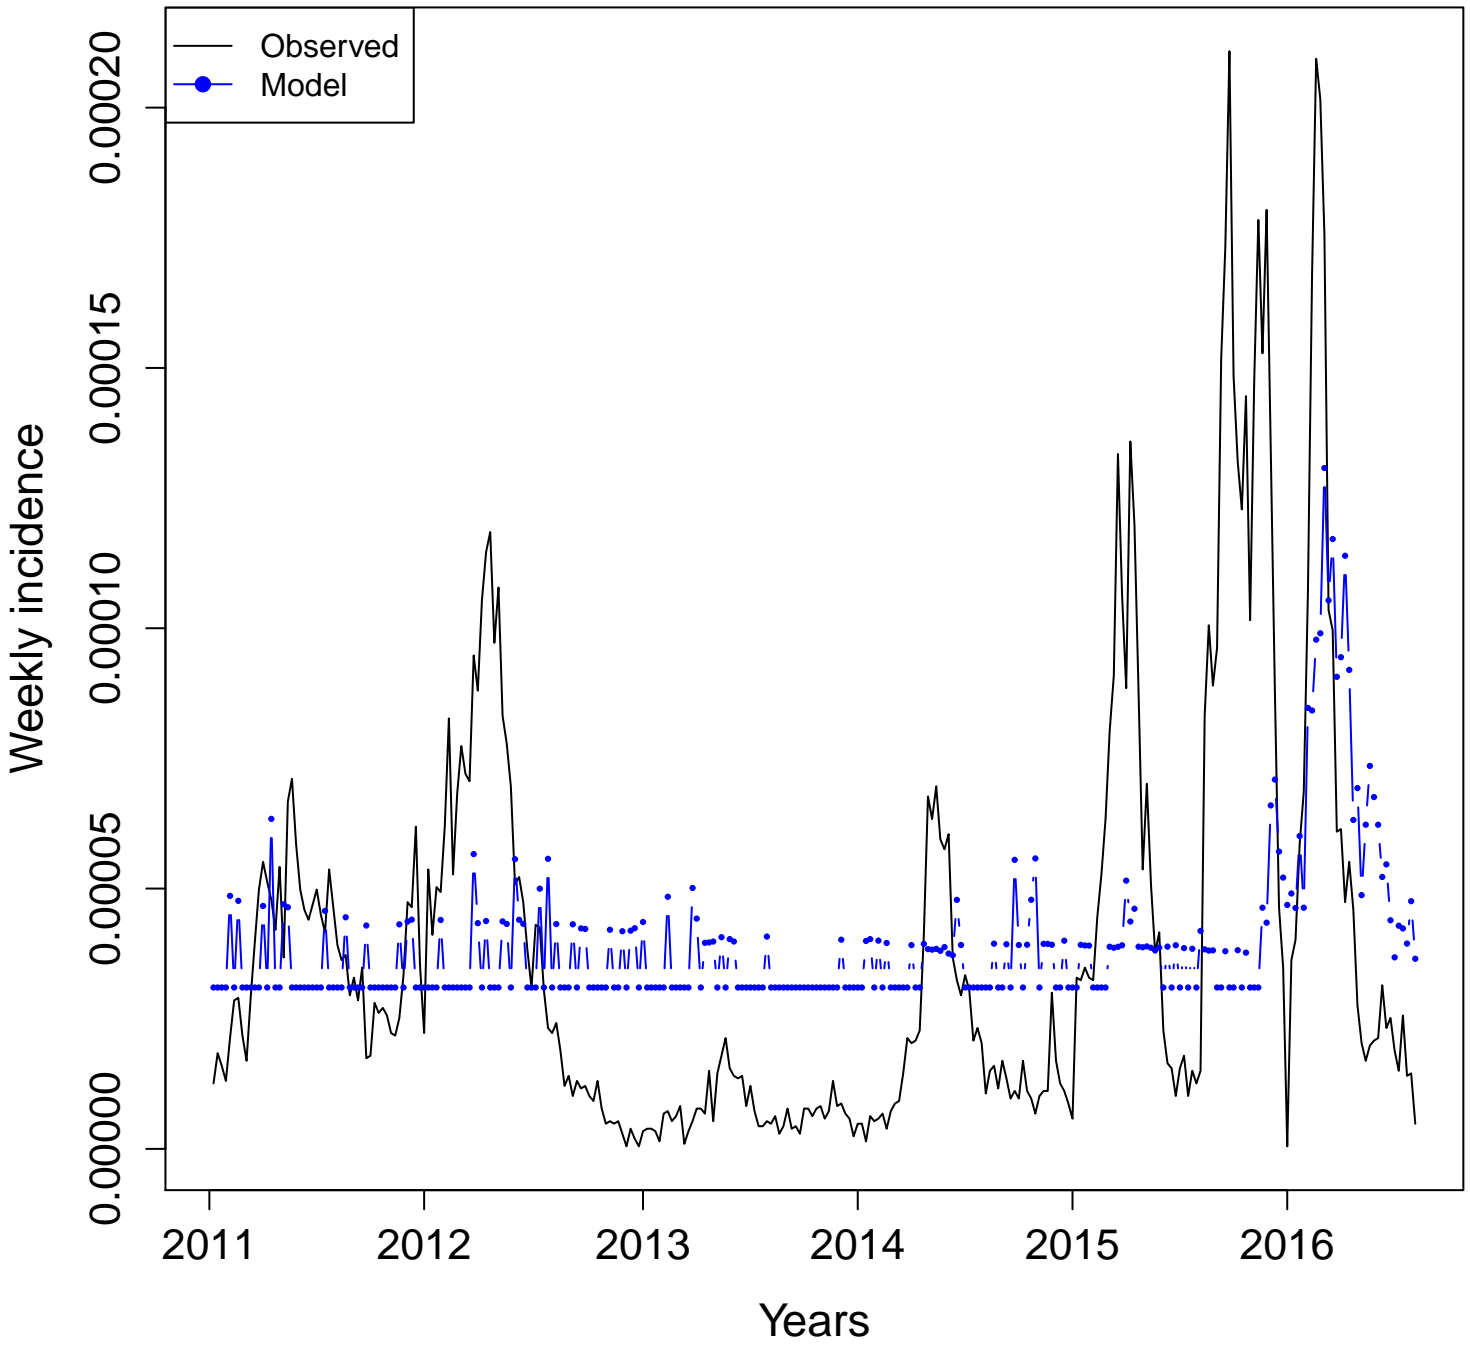



**SE- aegypti**  
**Adj. R squared = 0.1221**

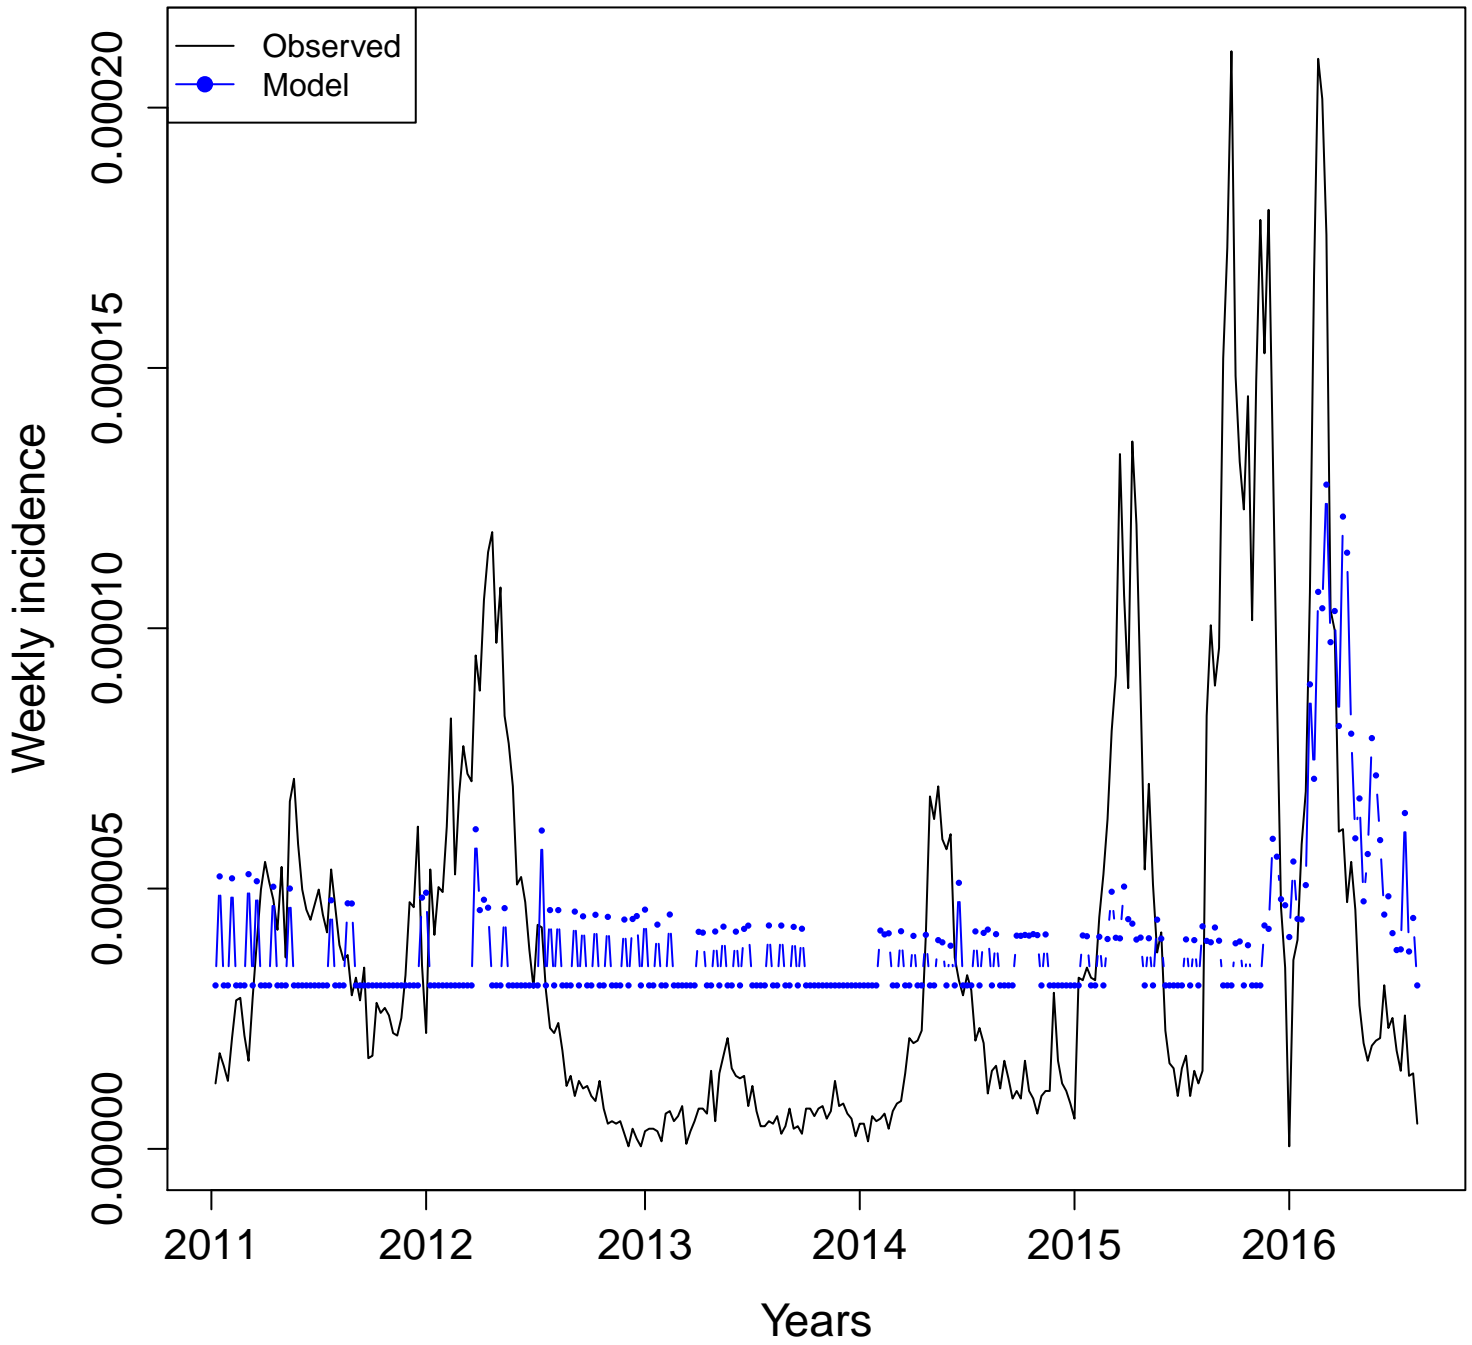

**SE- dengue**  
**Adj. R squared = 0.2878**

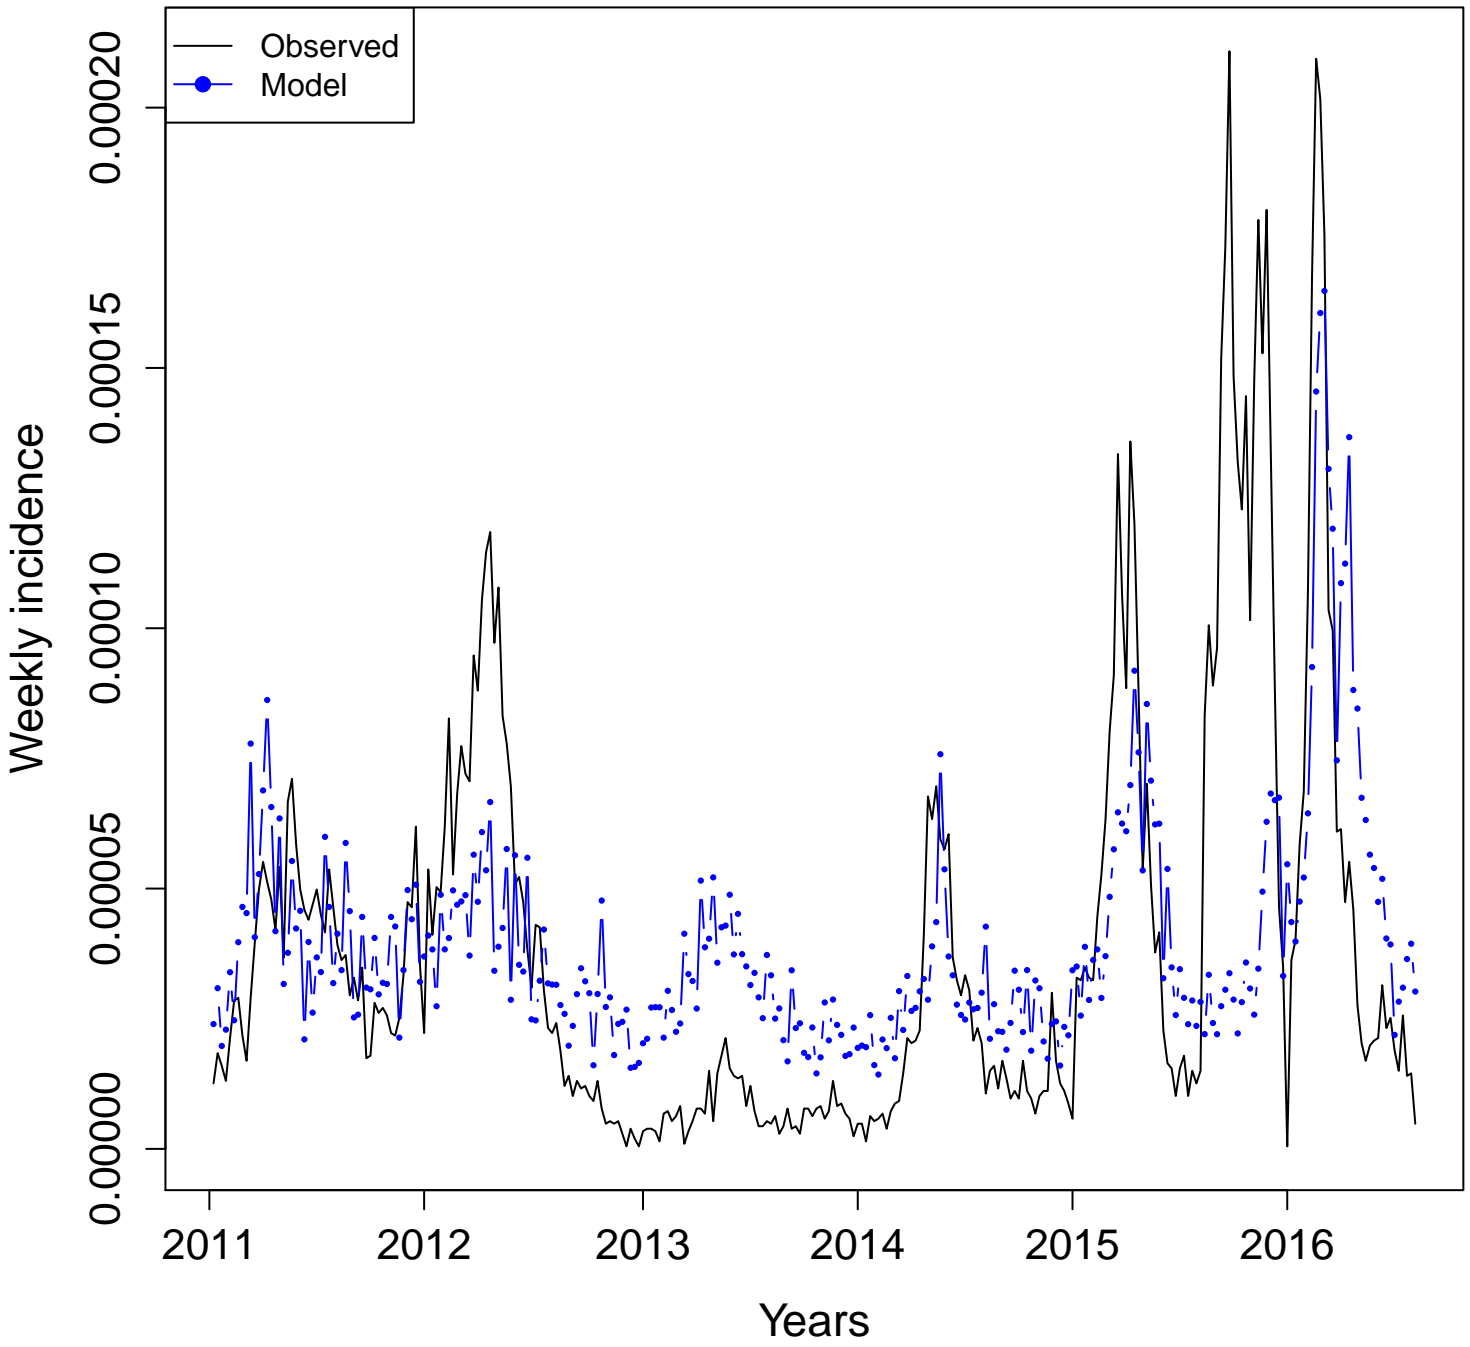

**SE- dengue.sintomas**  
**Adj. R squared = 0.1506**

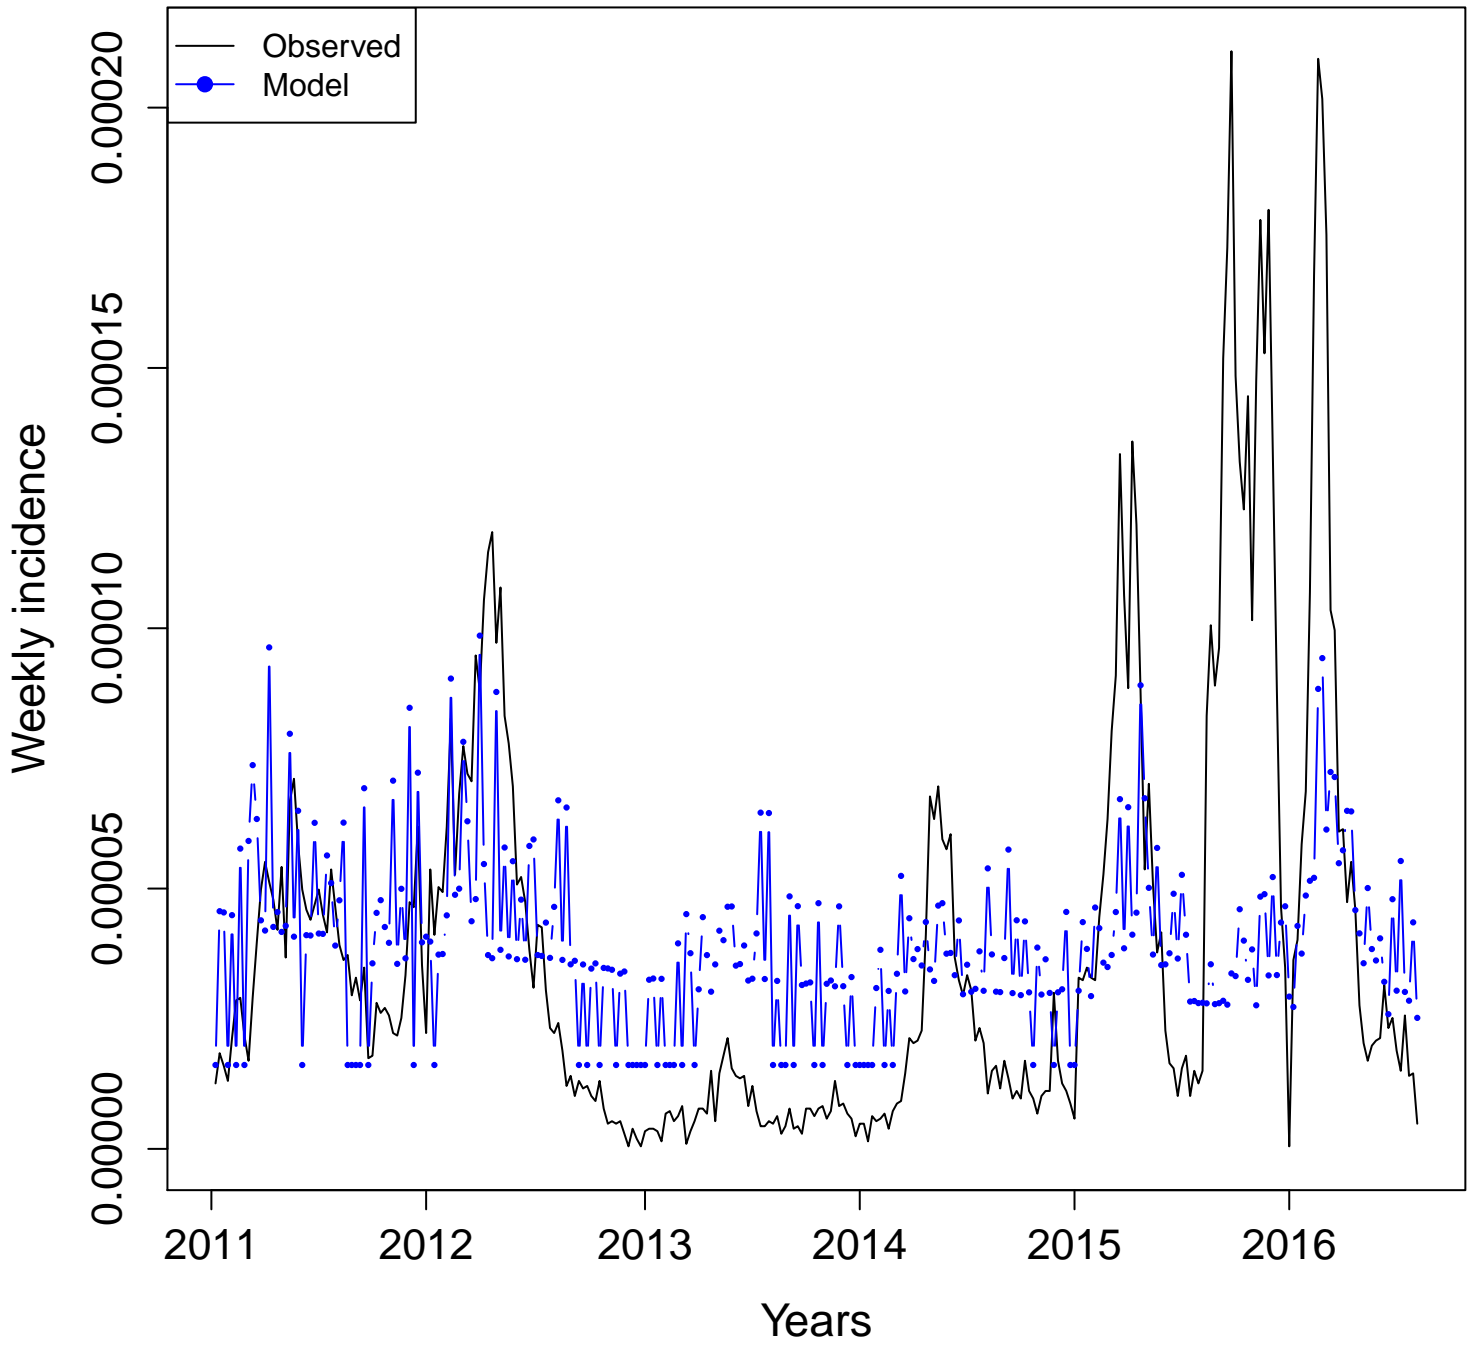

**SE- mosquito.dengue**  
**Adj. R squared = 0.1392**

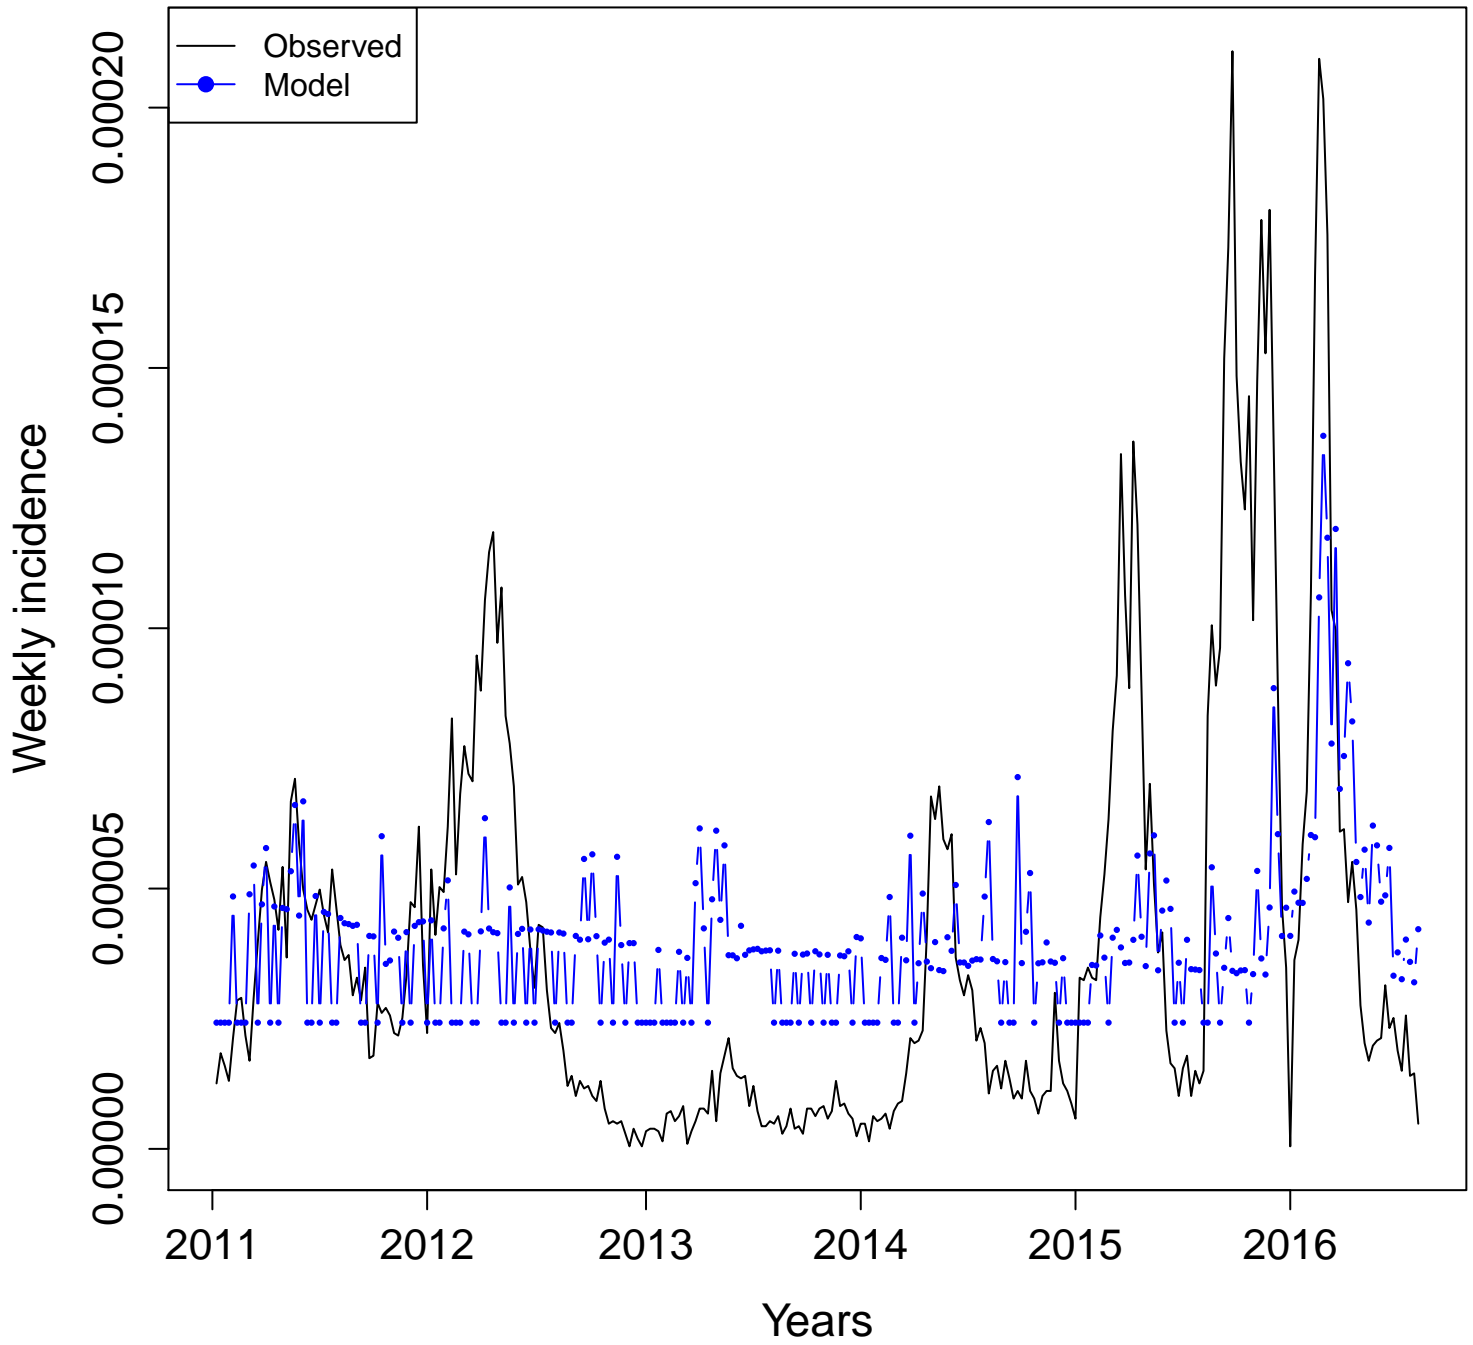

# SE- mosquito

Adj. R squared = 0.1539

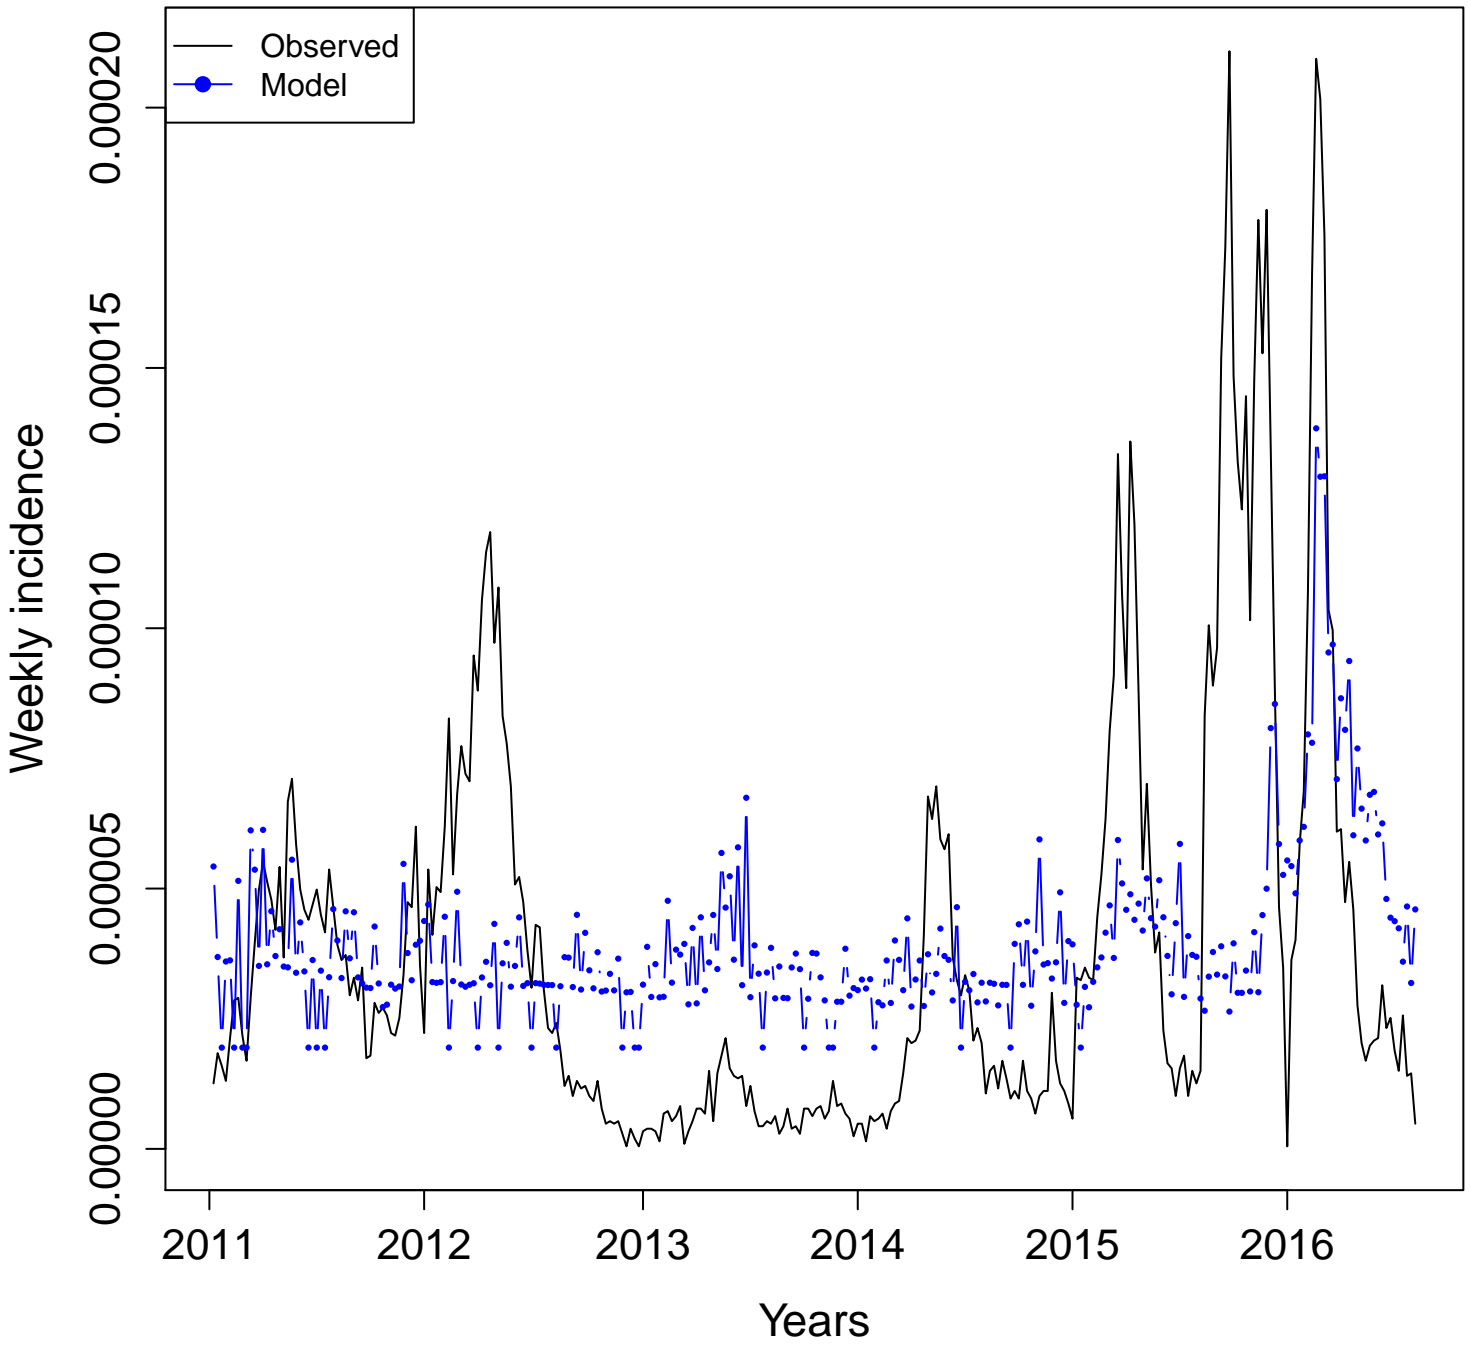

**SE- sintomas.da.dengue**  
**Adj. R squared = 0.0596**

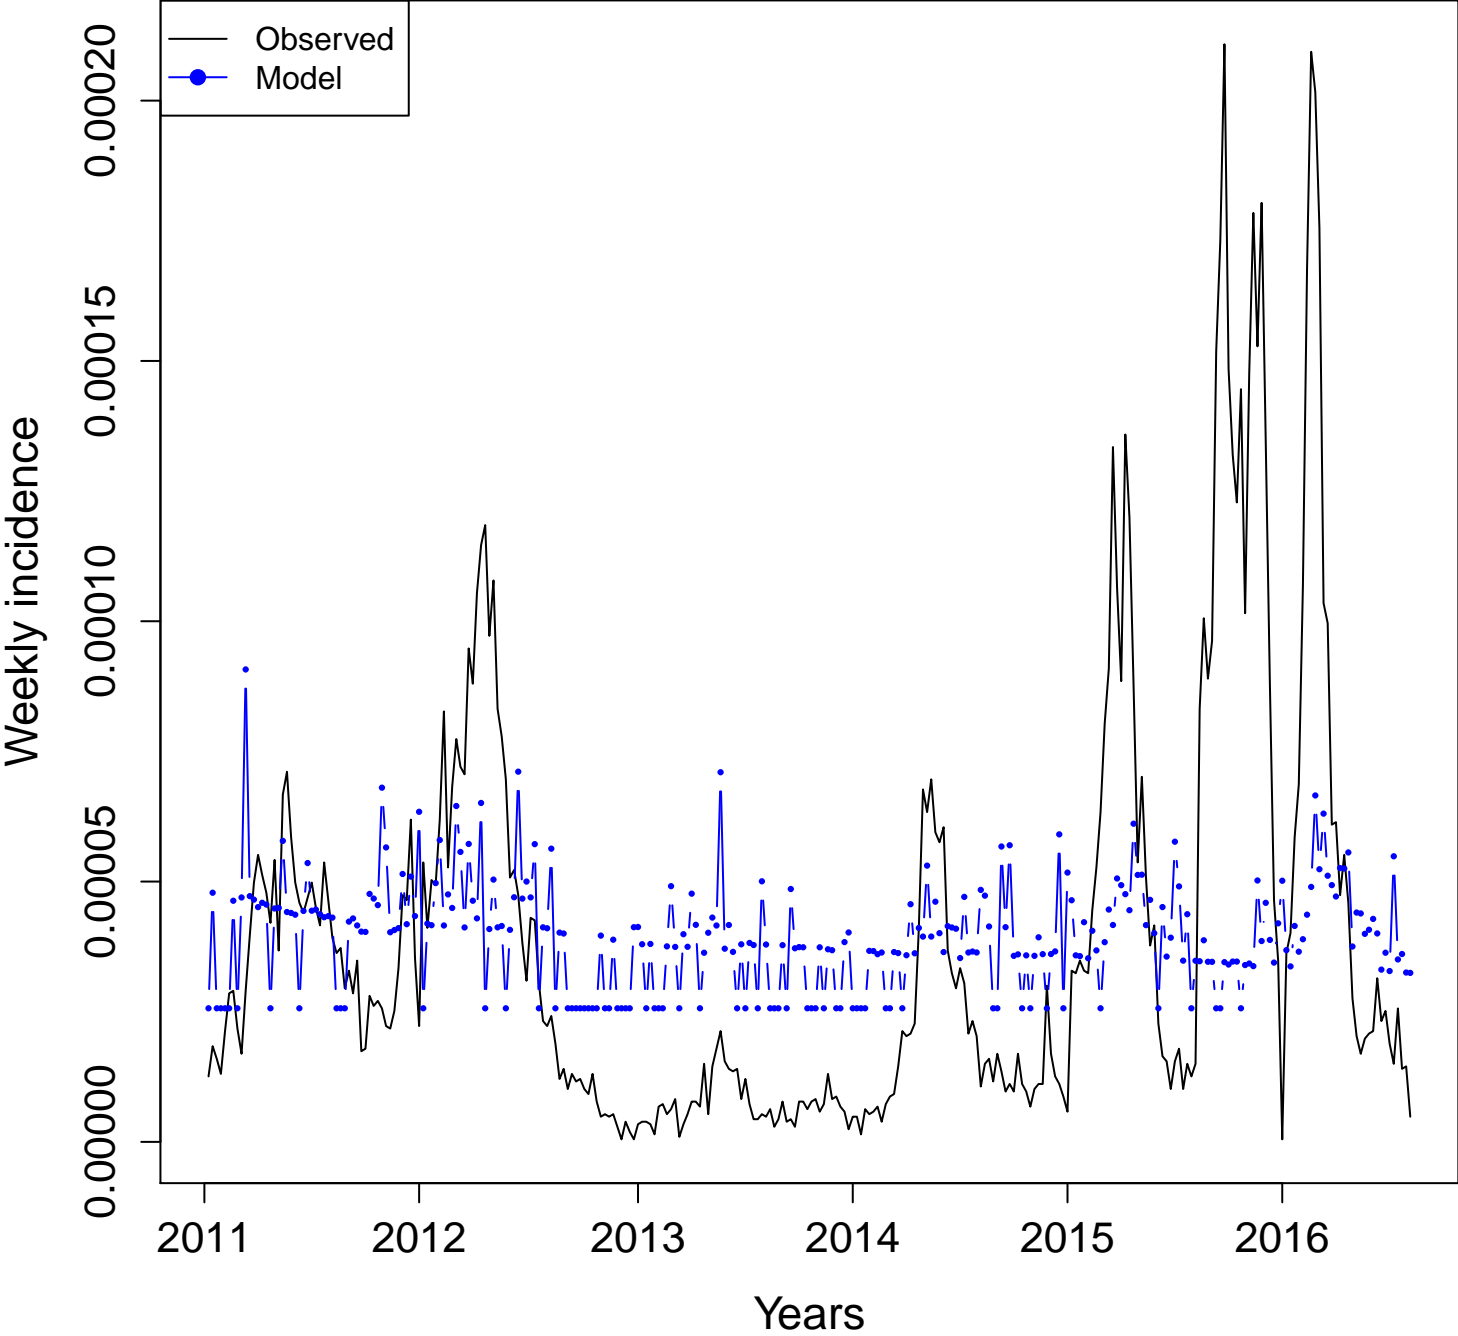

## São Paulo (SP)

# Dengue incidence vs. Google Health Trends (2011–2016)

### Definitions:

- **Combined terms:**
  - **All:** model with all the available terms.  $n$  = number of terms
  - **Four:** model with "dengue", "dengue sintomas", "aedes", and "mosquito".
  - **Uncorrelated:** model with non-correlated terms.  $n$  = number of uncorrelated terms
- **Individual terms:** Plots developed with one term at a time.
- Terms for all and uncorrelated models can be found in additional file 3.

**Combined terms**  
**Adjusted R squared**

**São Paulo (SP)**



All  
(n = 13)

BR-SP  
Adj. R squared = 0.9295

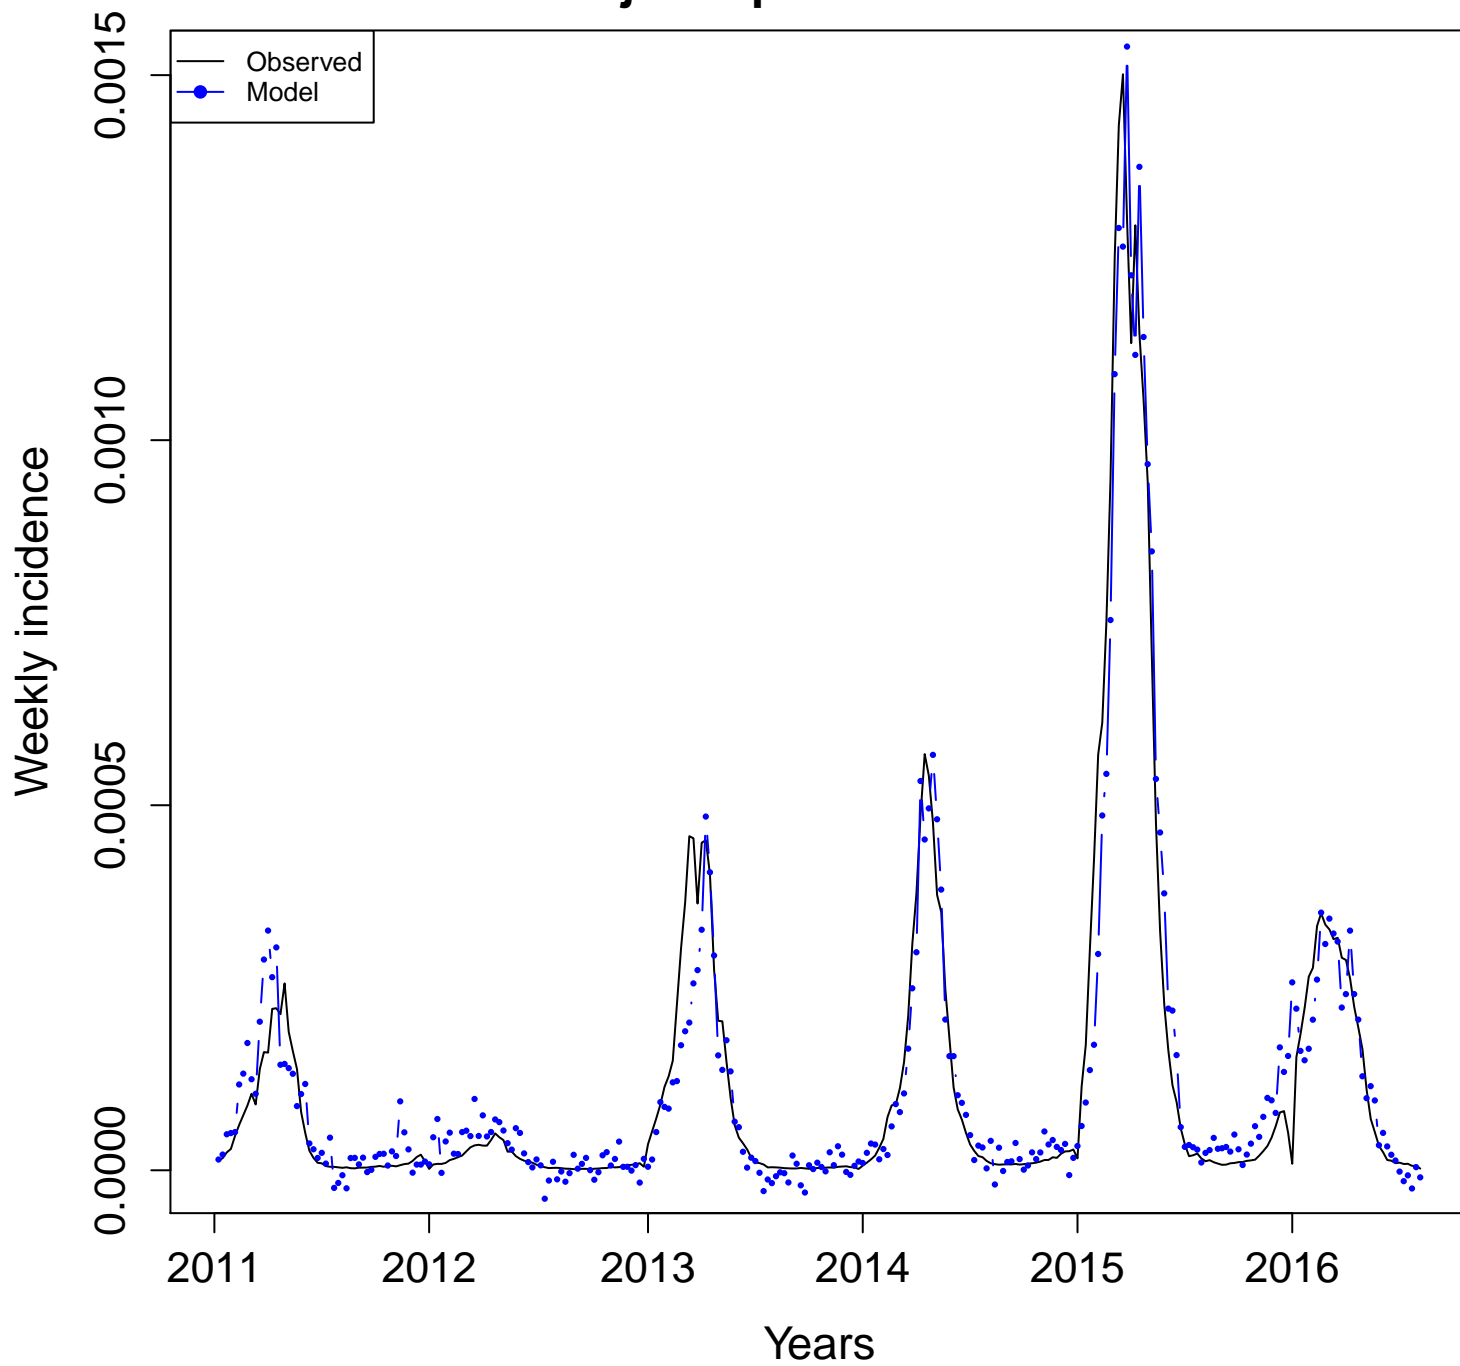

**BR-SP**  
**Adj. R squared = 0.9189**

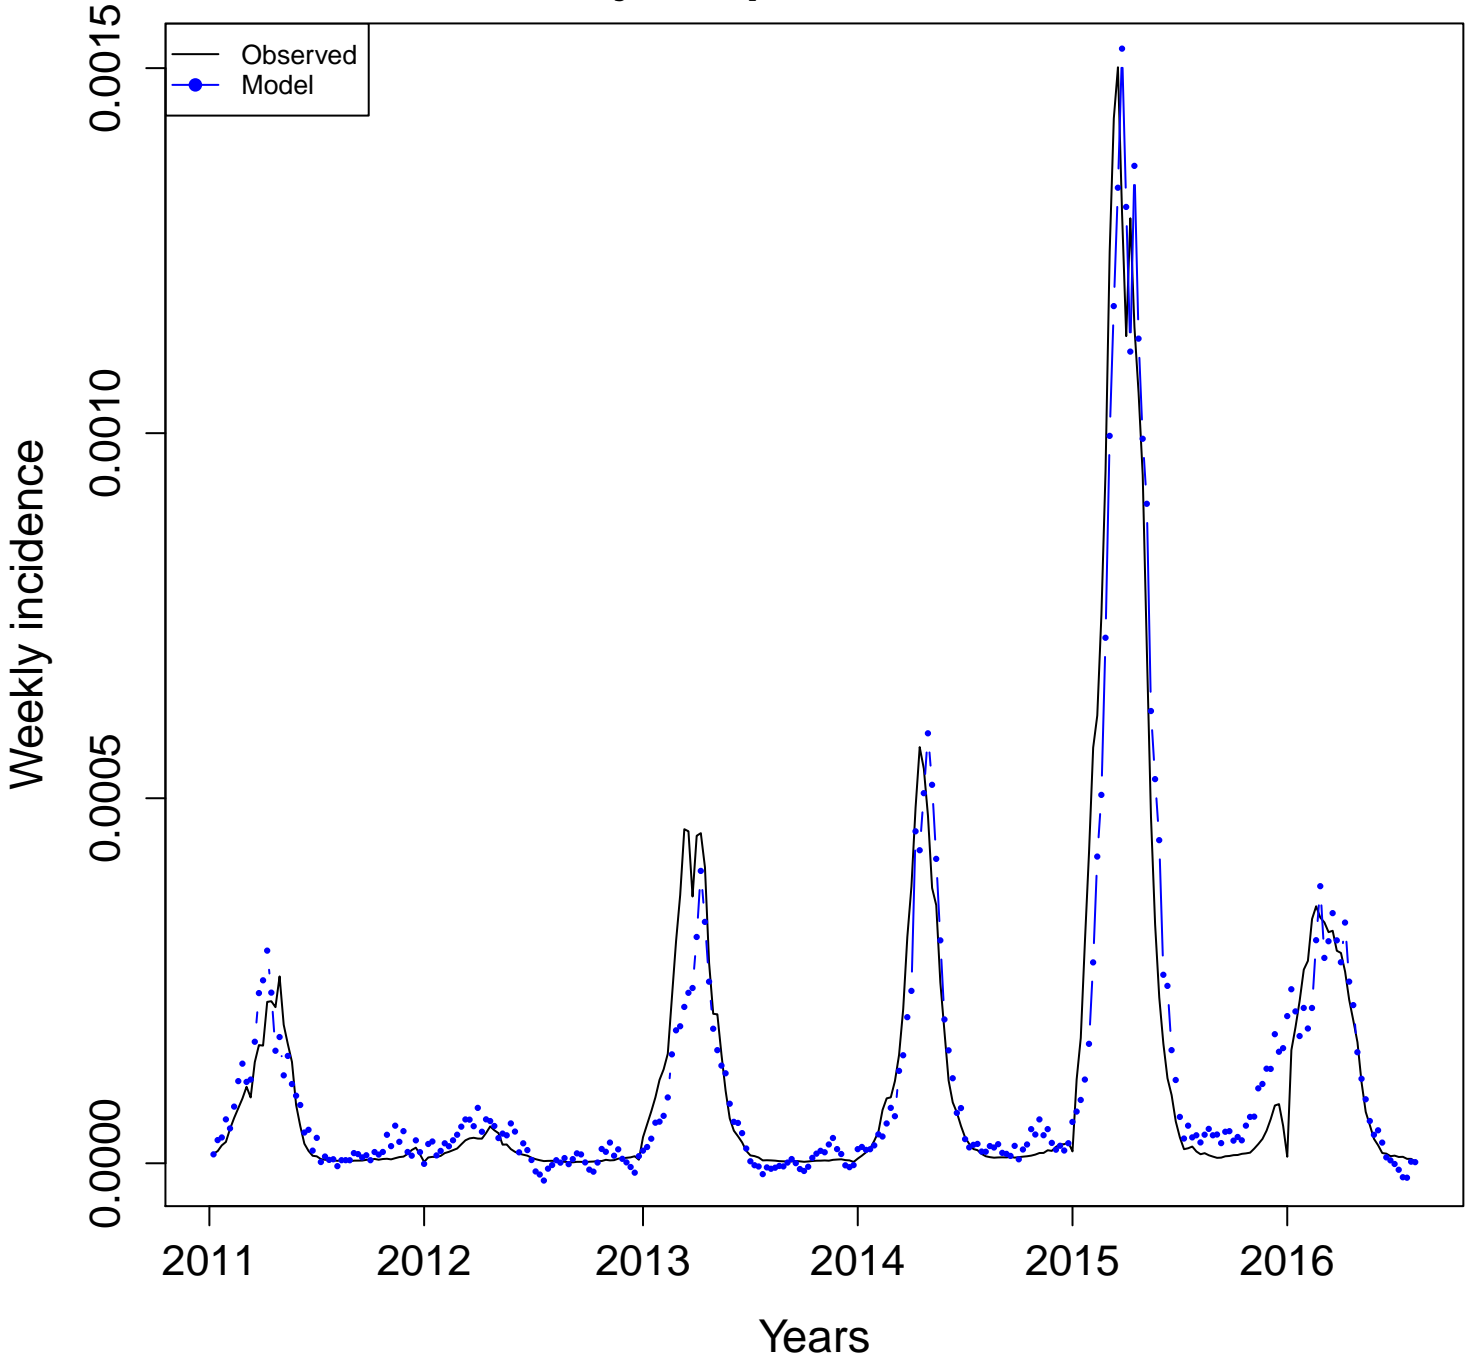

**Uncorrelated  
(n = 6)**

**BR-SP  
Adj. R squared = 0.8614**

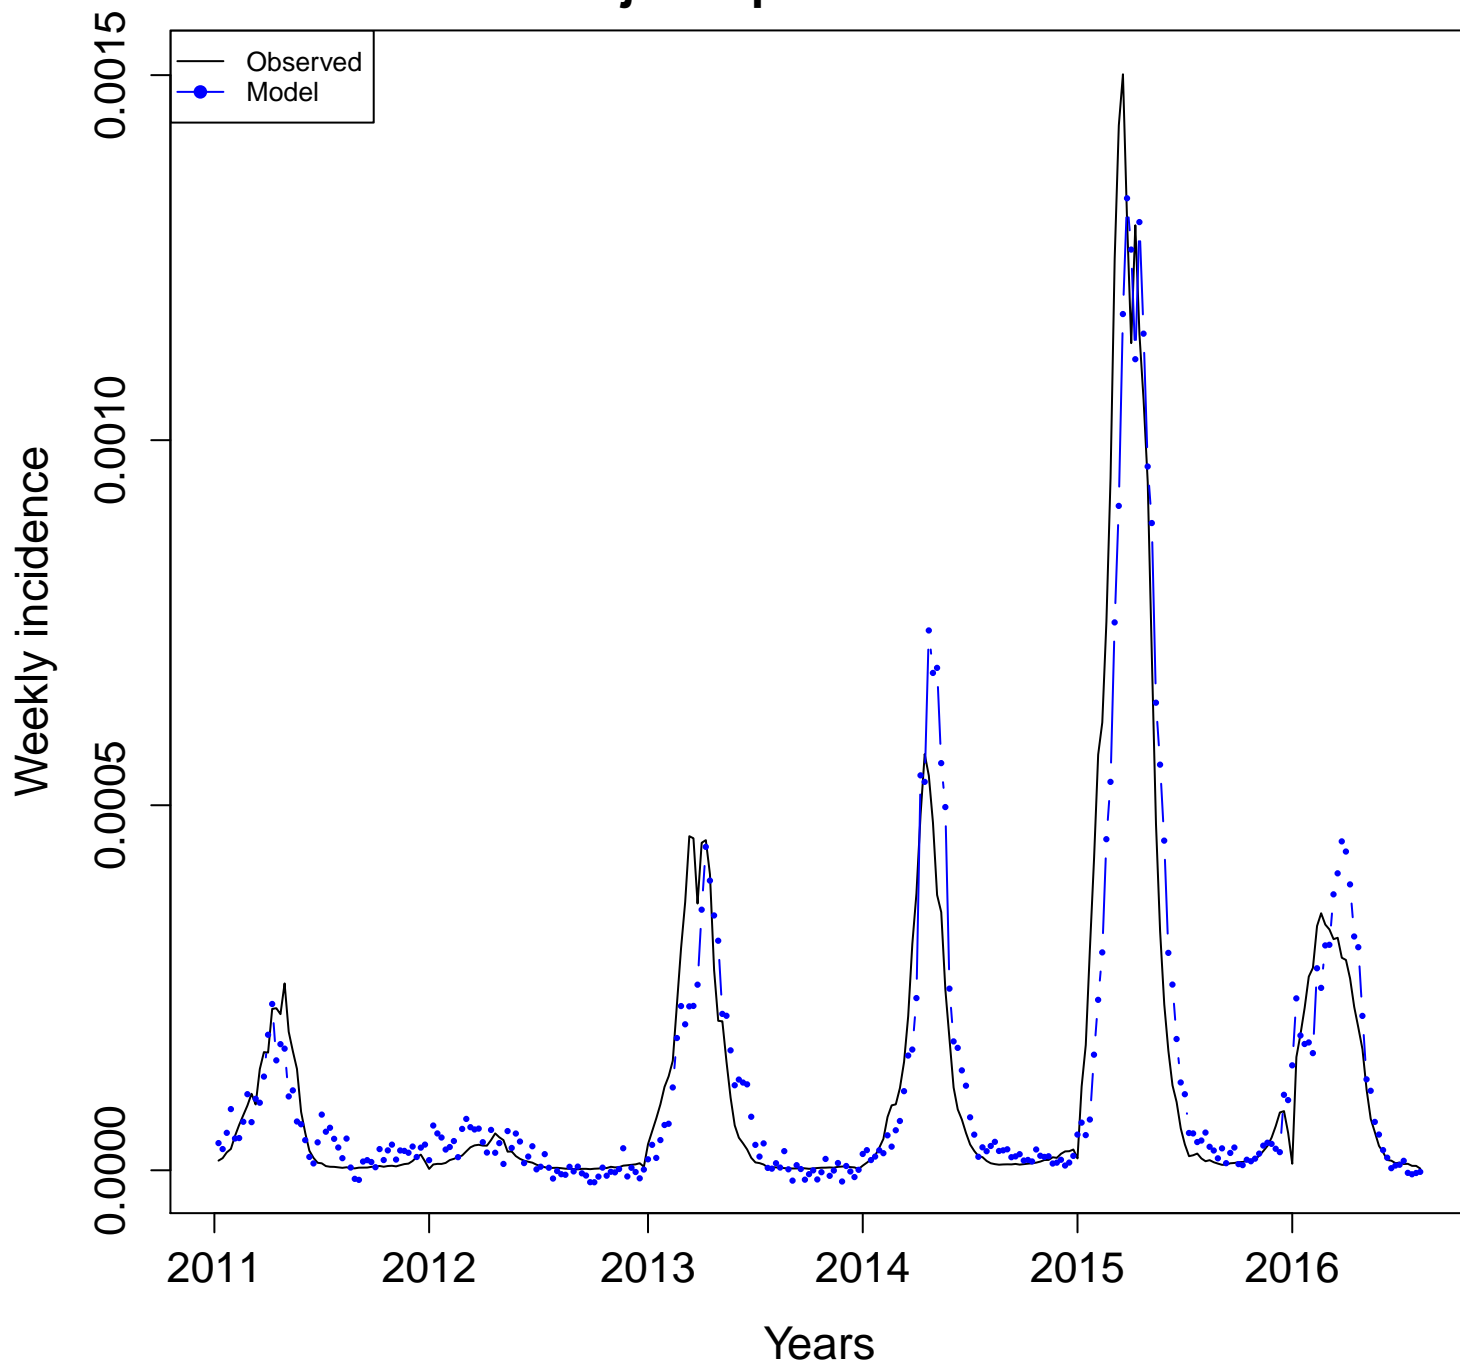

**Individual terms**  
**Adjusted R squared**

**São Paulo (SP)**

**SP- aedes.aegypti**  
**Adj. R squared = 0.0918**

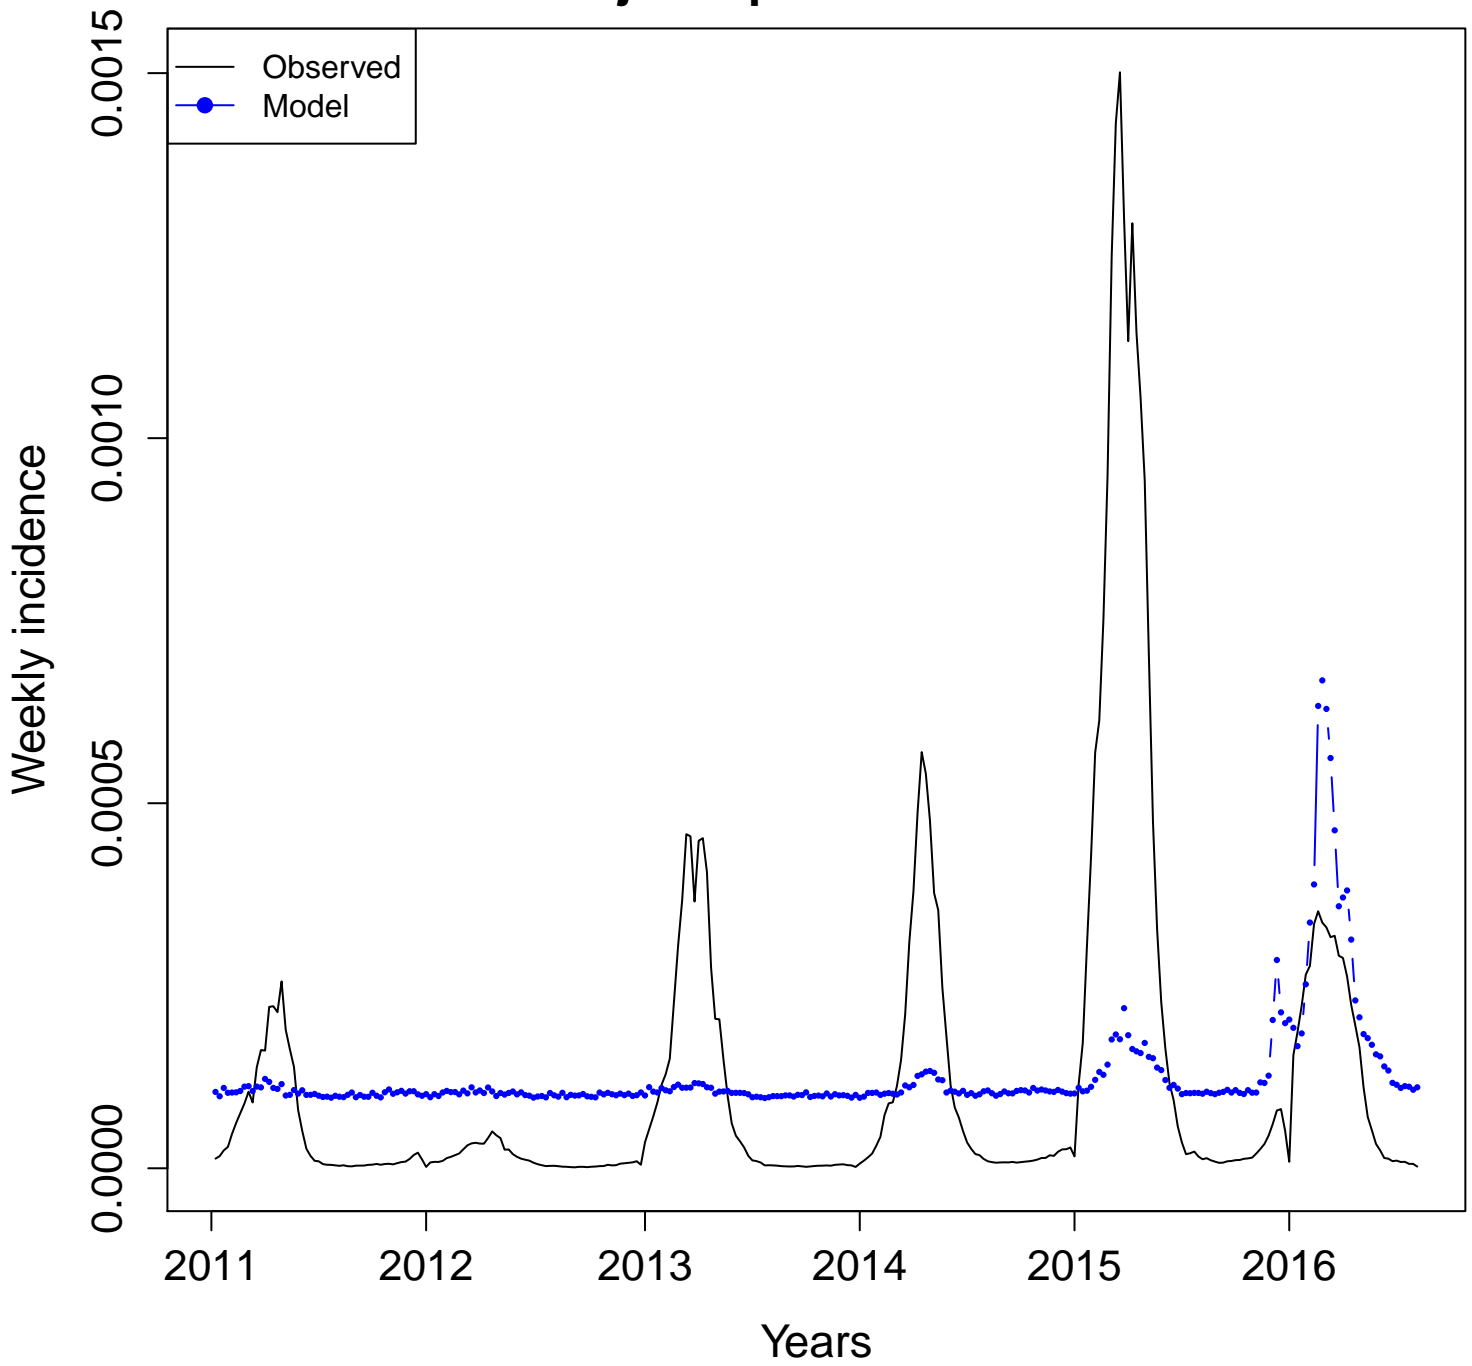

**SP- aedes**  
**Adj. R squared = 0.0901**

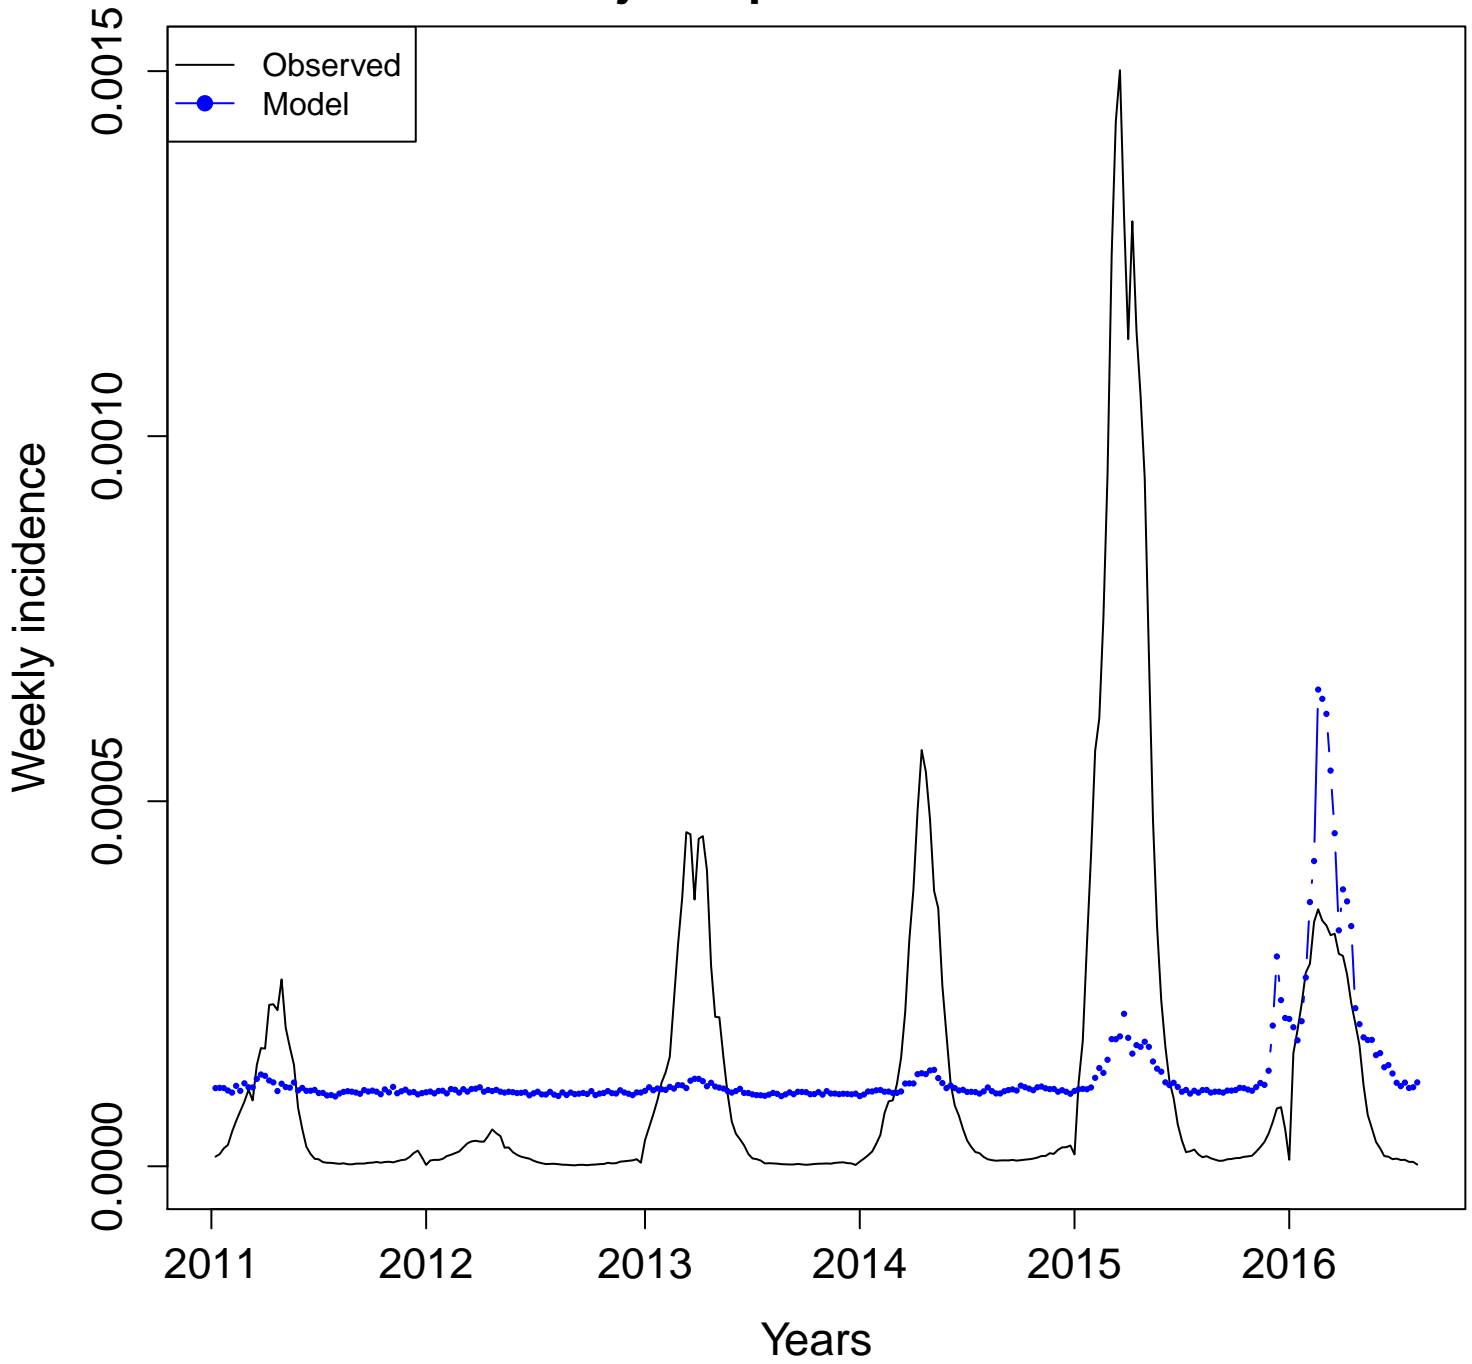

**SP- aegypti**  
**Adj. R squared = 0.0917**

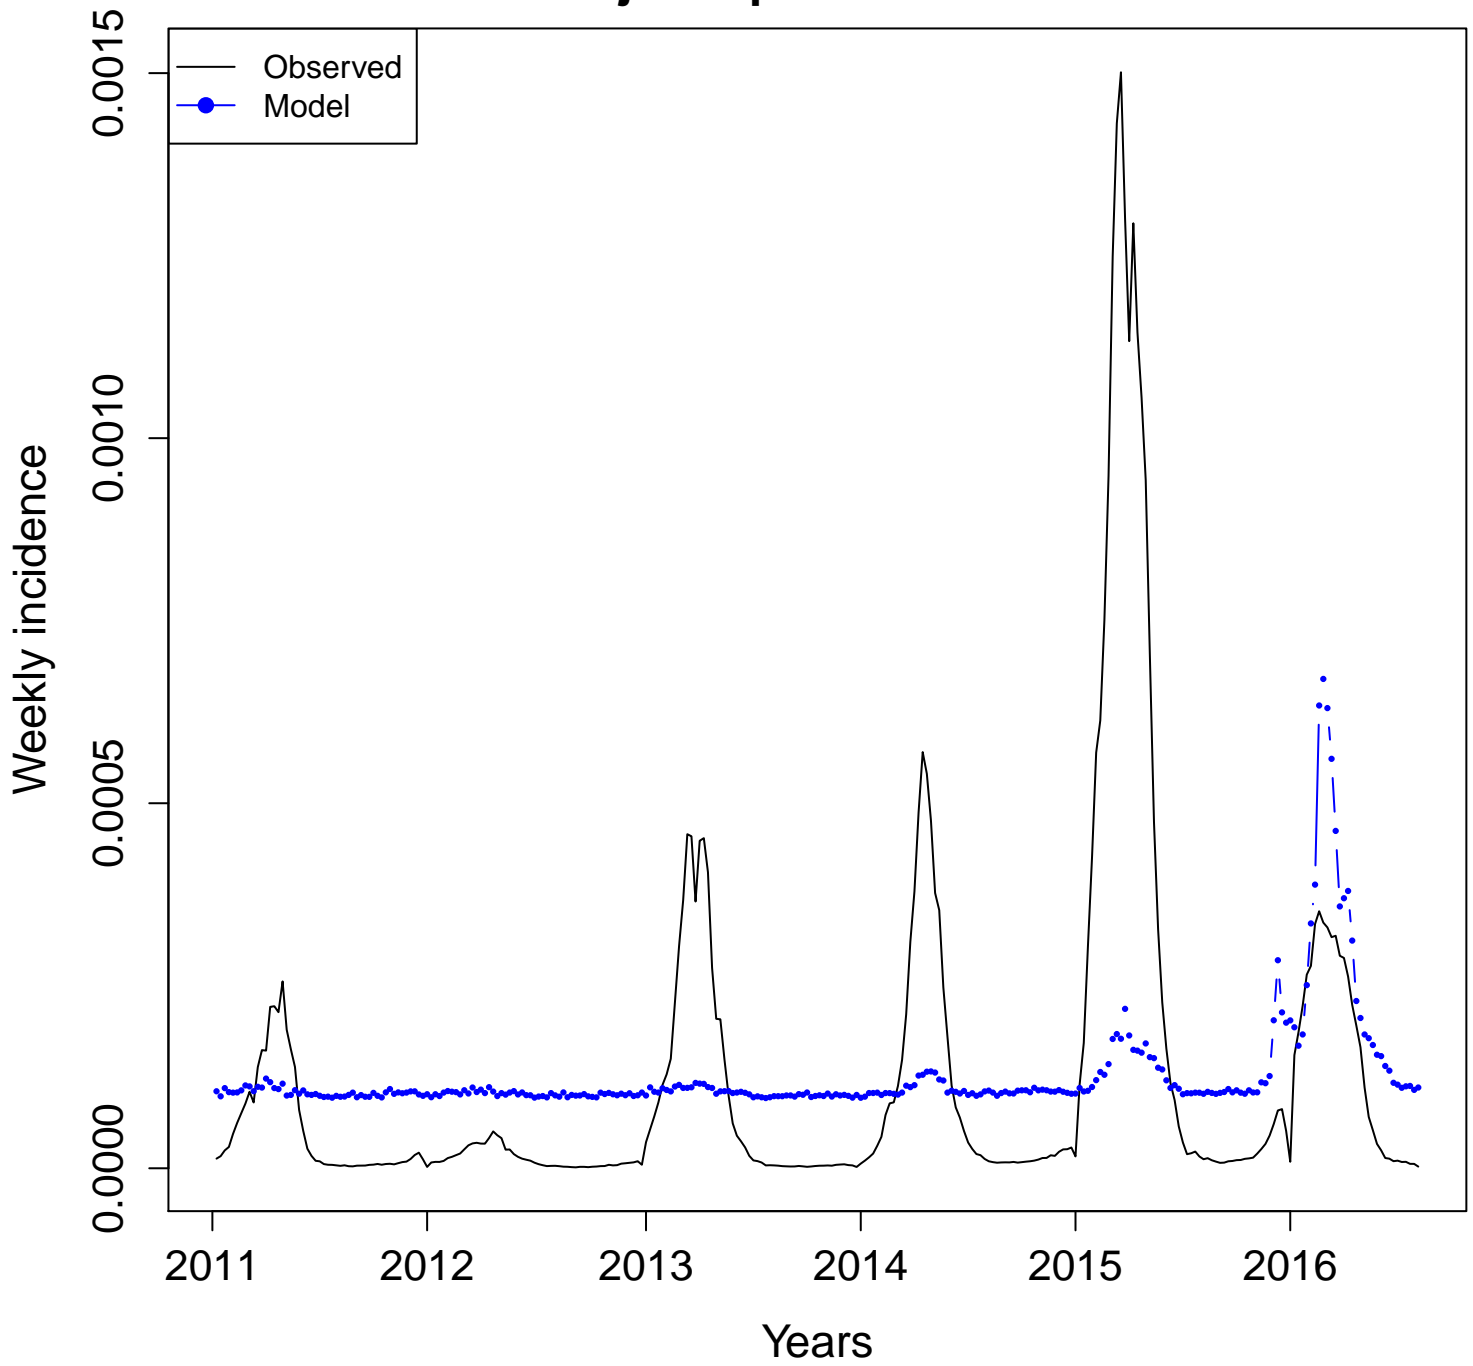

# SP- dengue.fever

Adj. R squared = 0.177

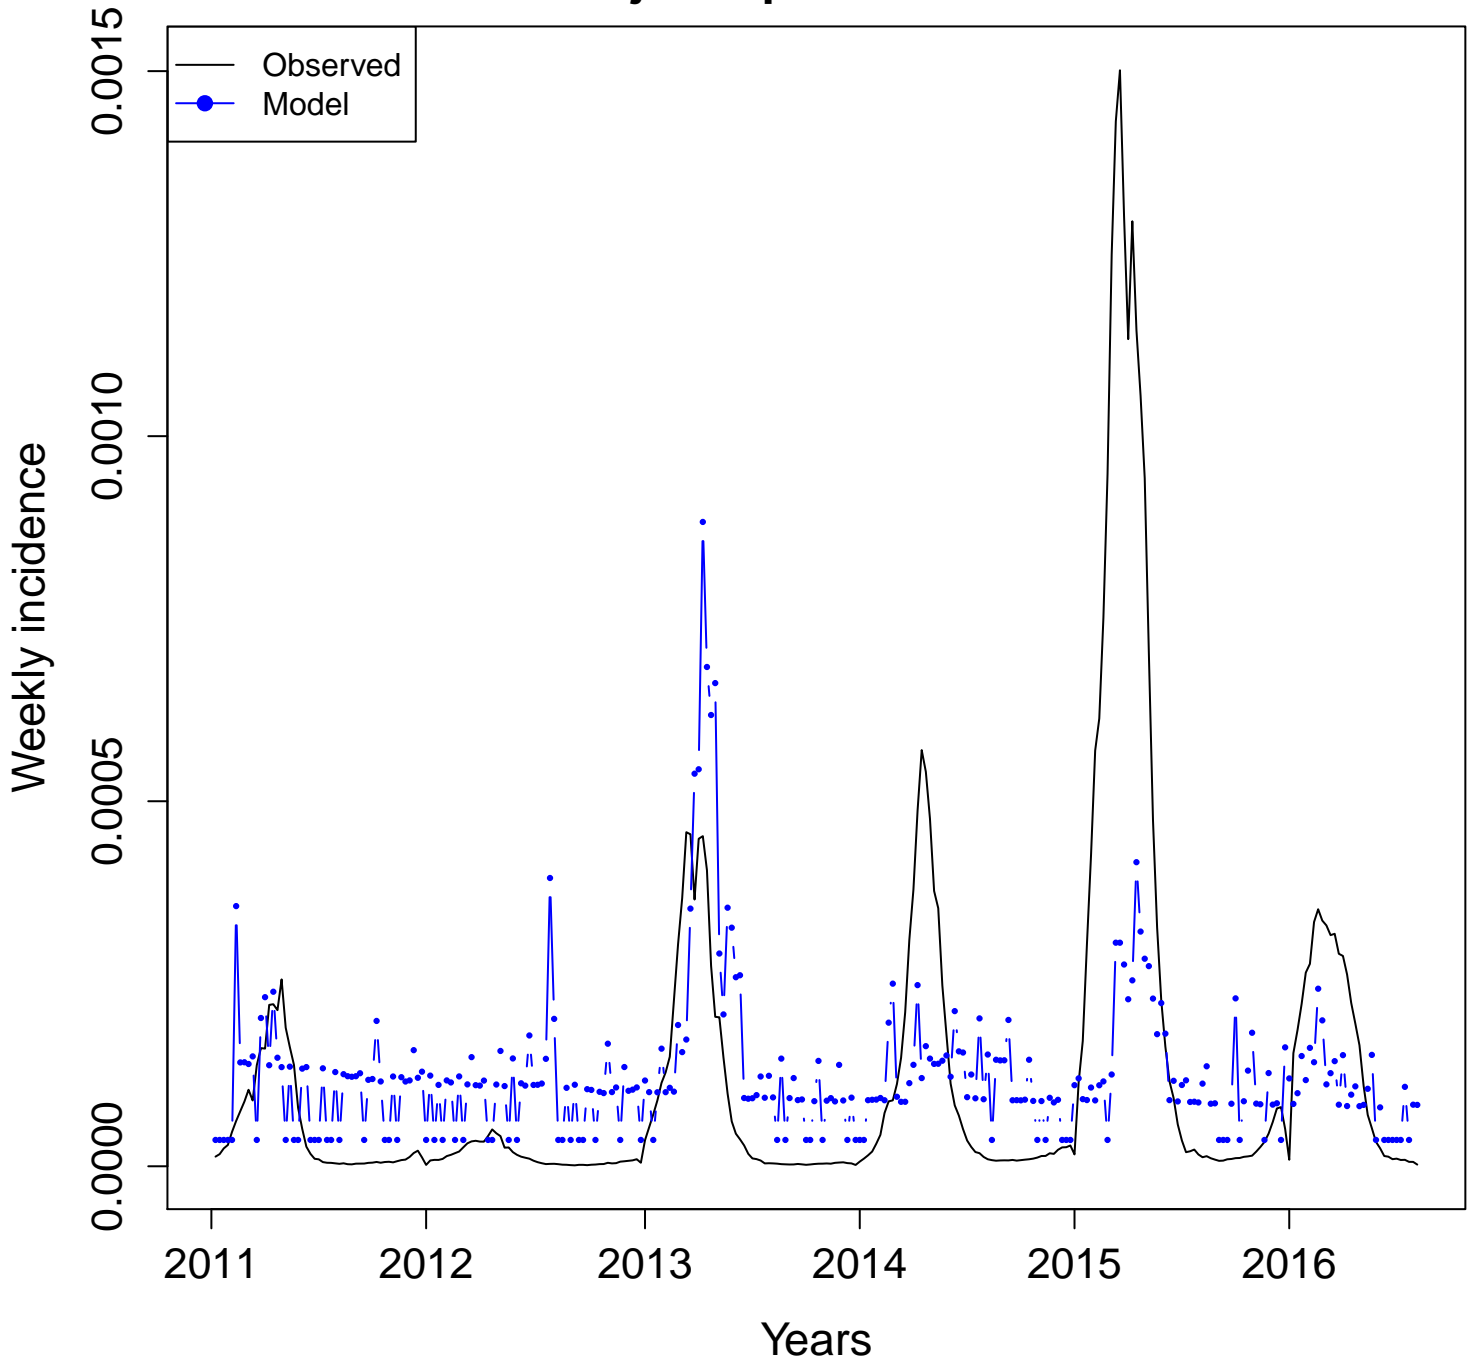



**SP- dengue.hemorrhagic.fever**  
**Adj. R squared = 0.1862**

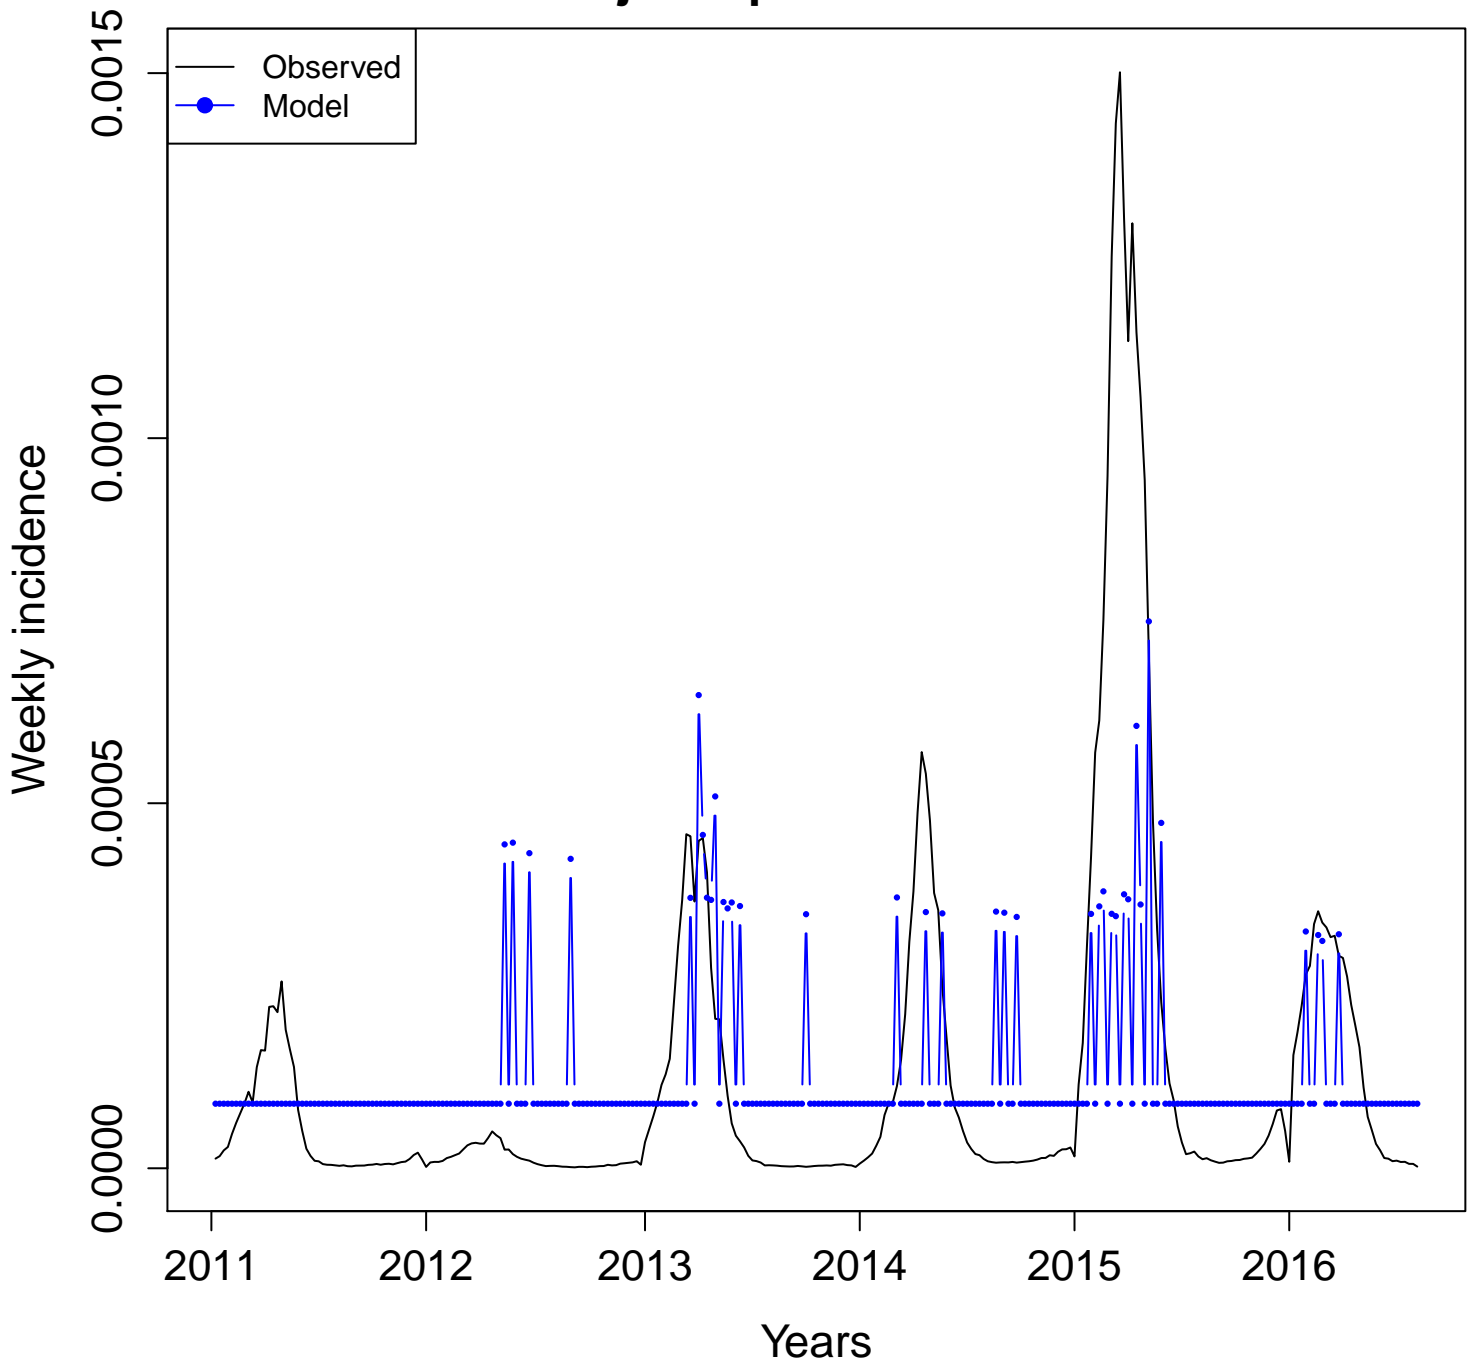

# SP- dengue

Adj. R squared = 0.8443

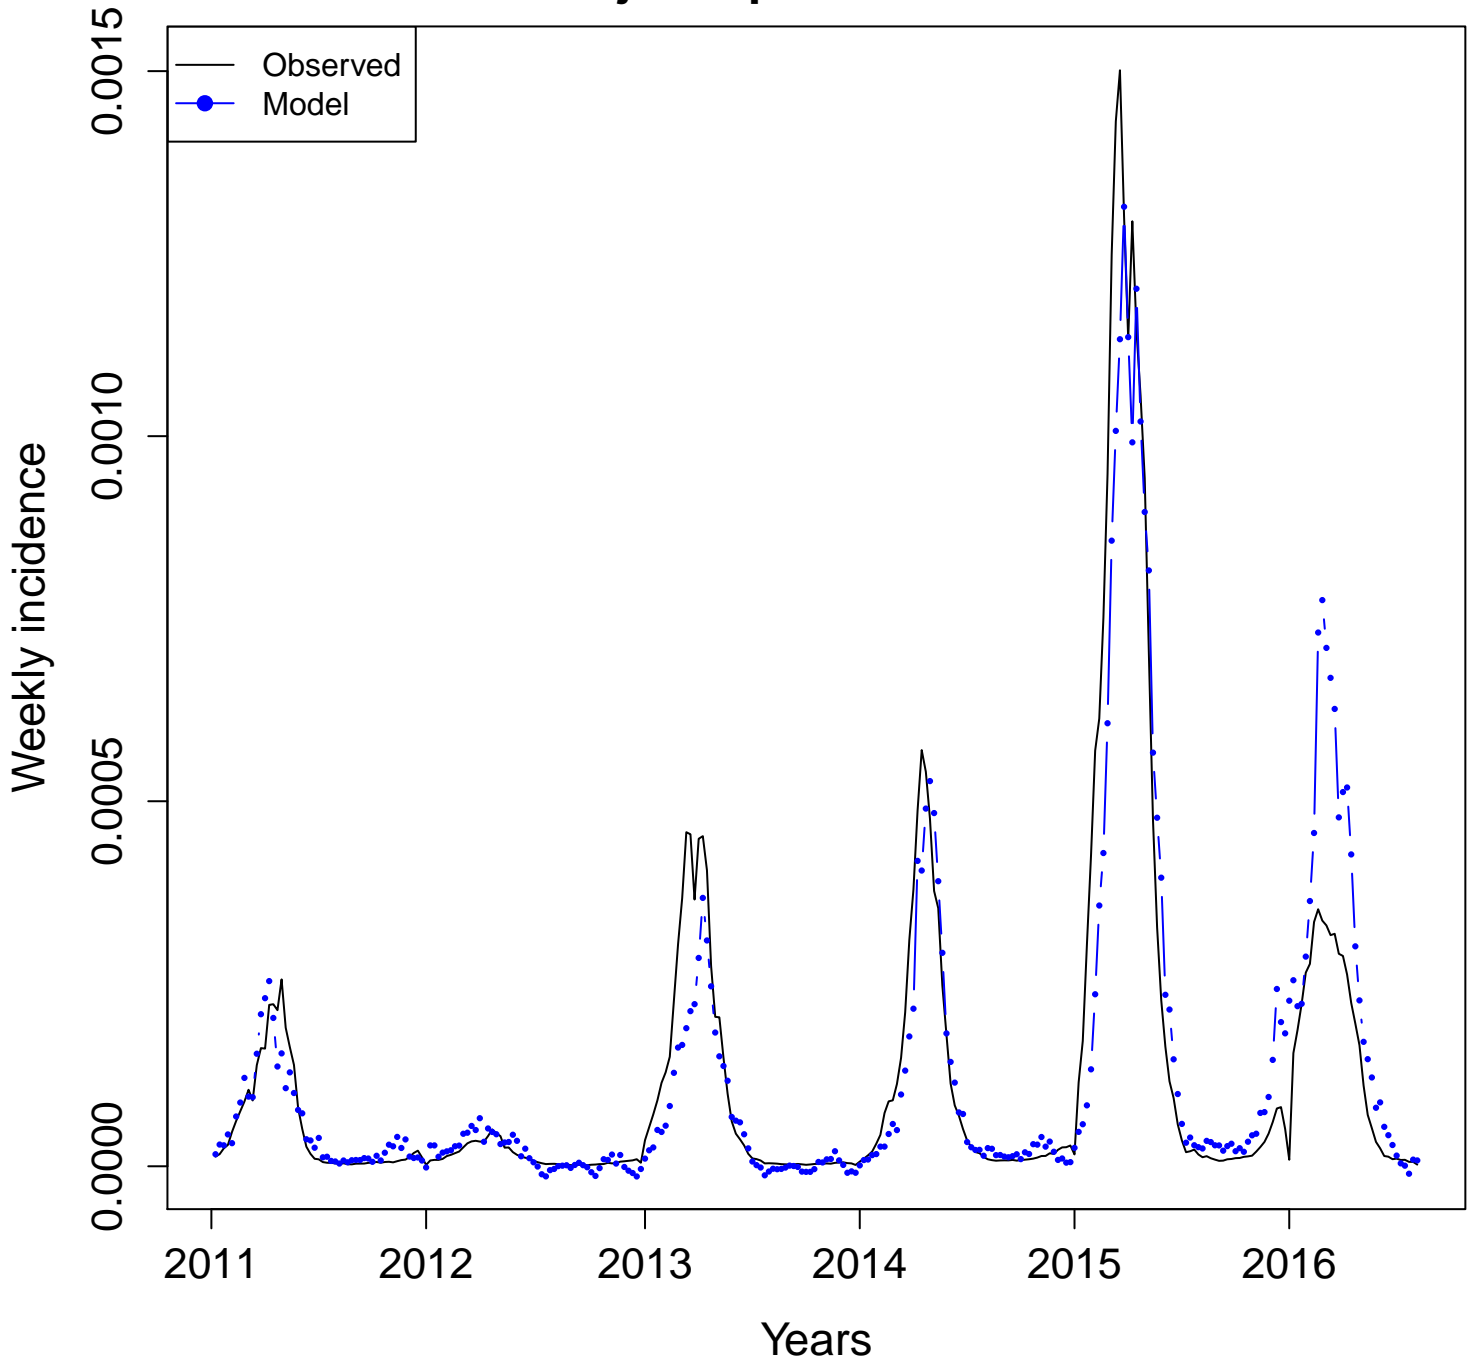

**SP- dengue.sintomas**  
**Adj. R squared = 0.8615**

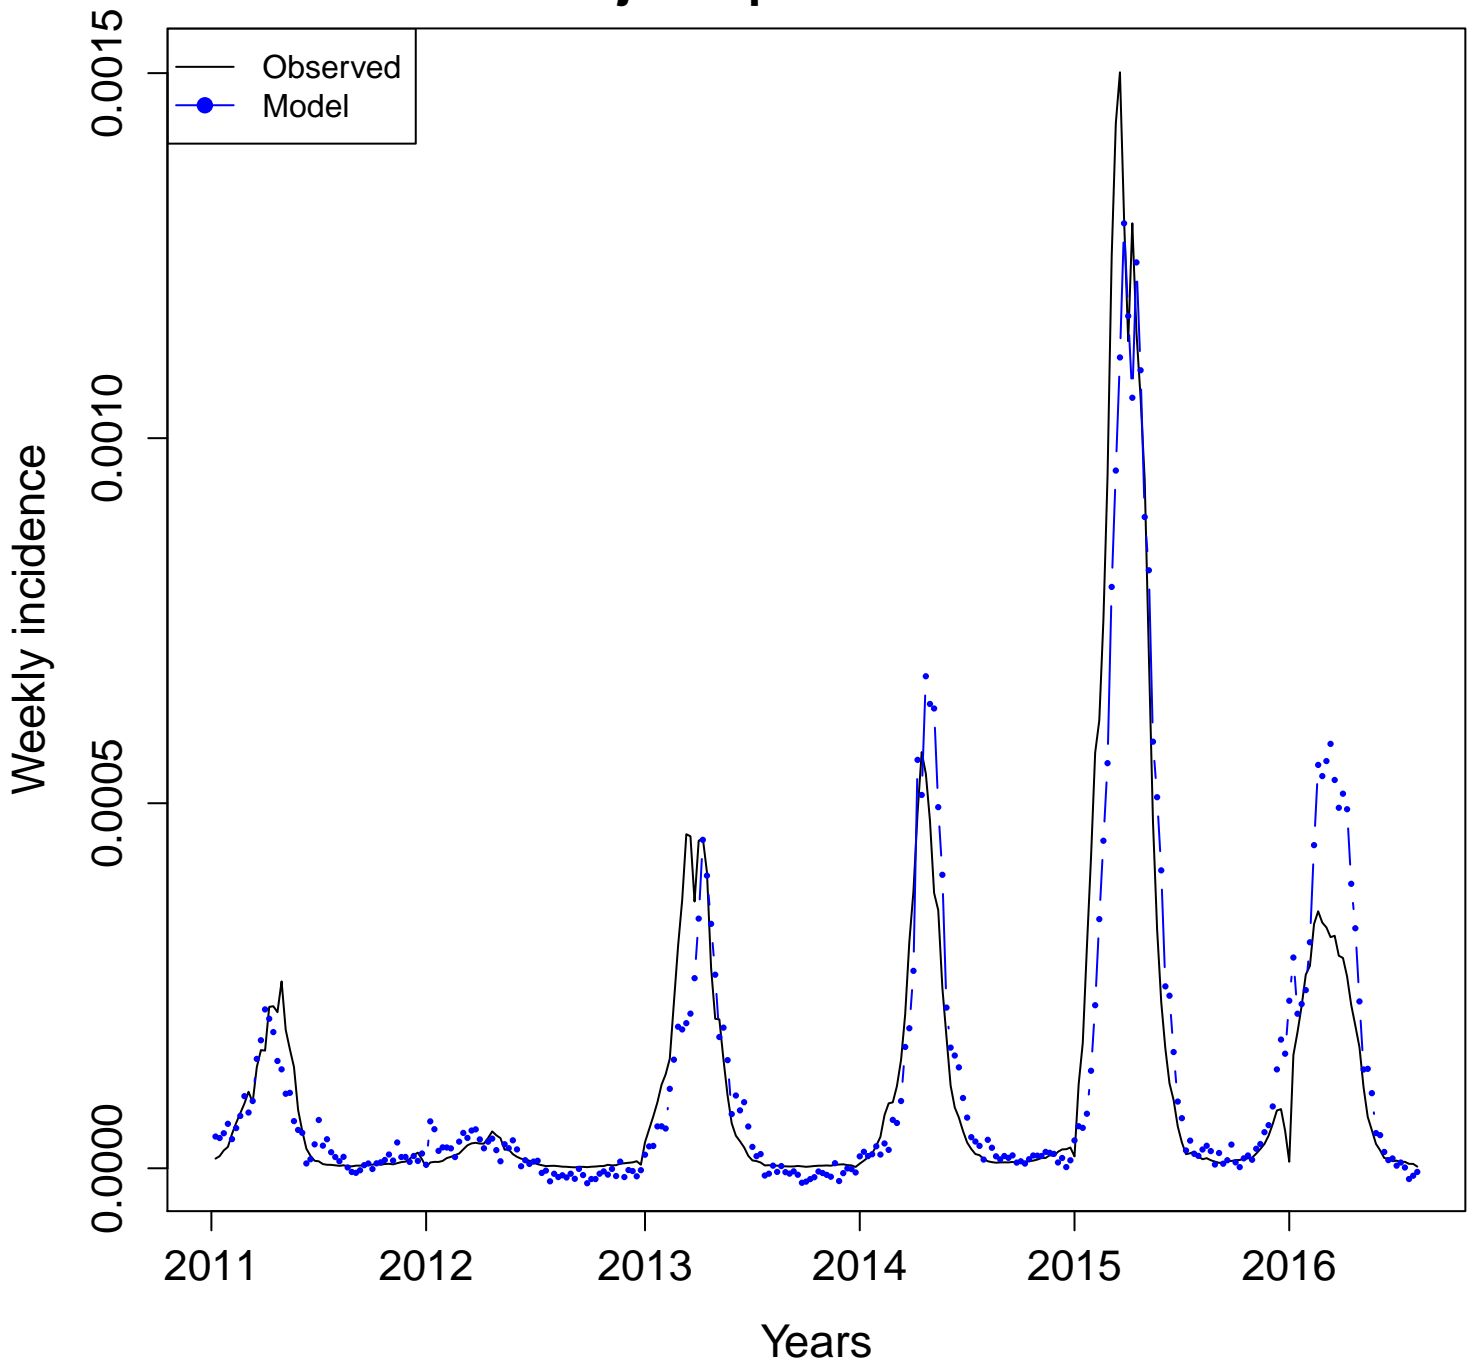

# SP- dengue.virus

Adj. R squared = 0.1043

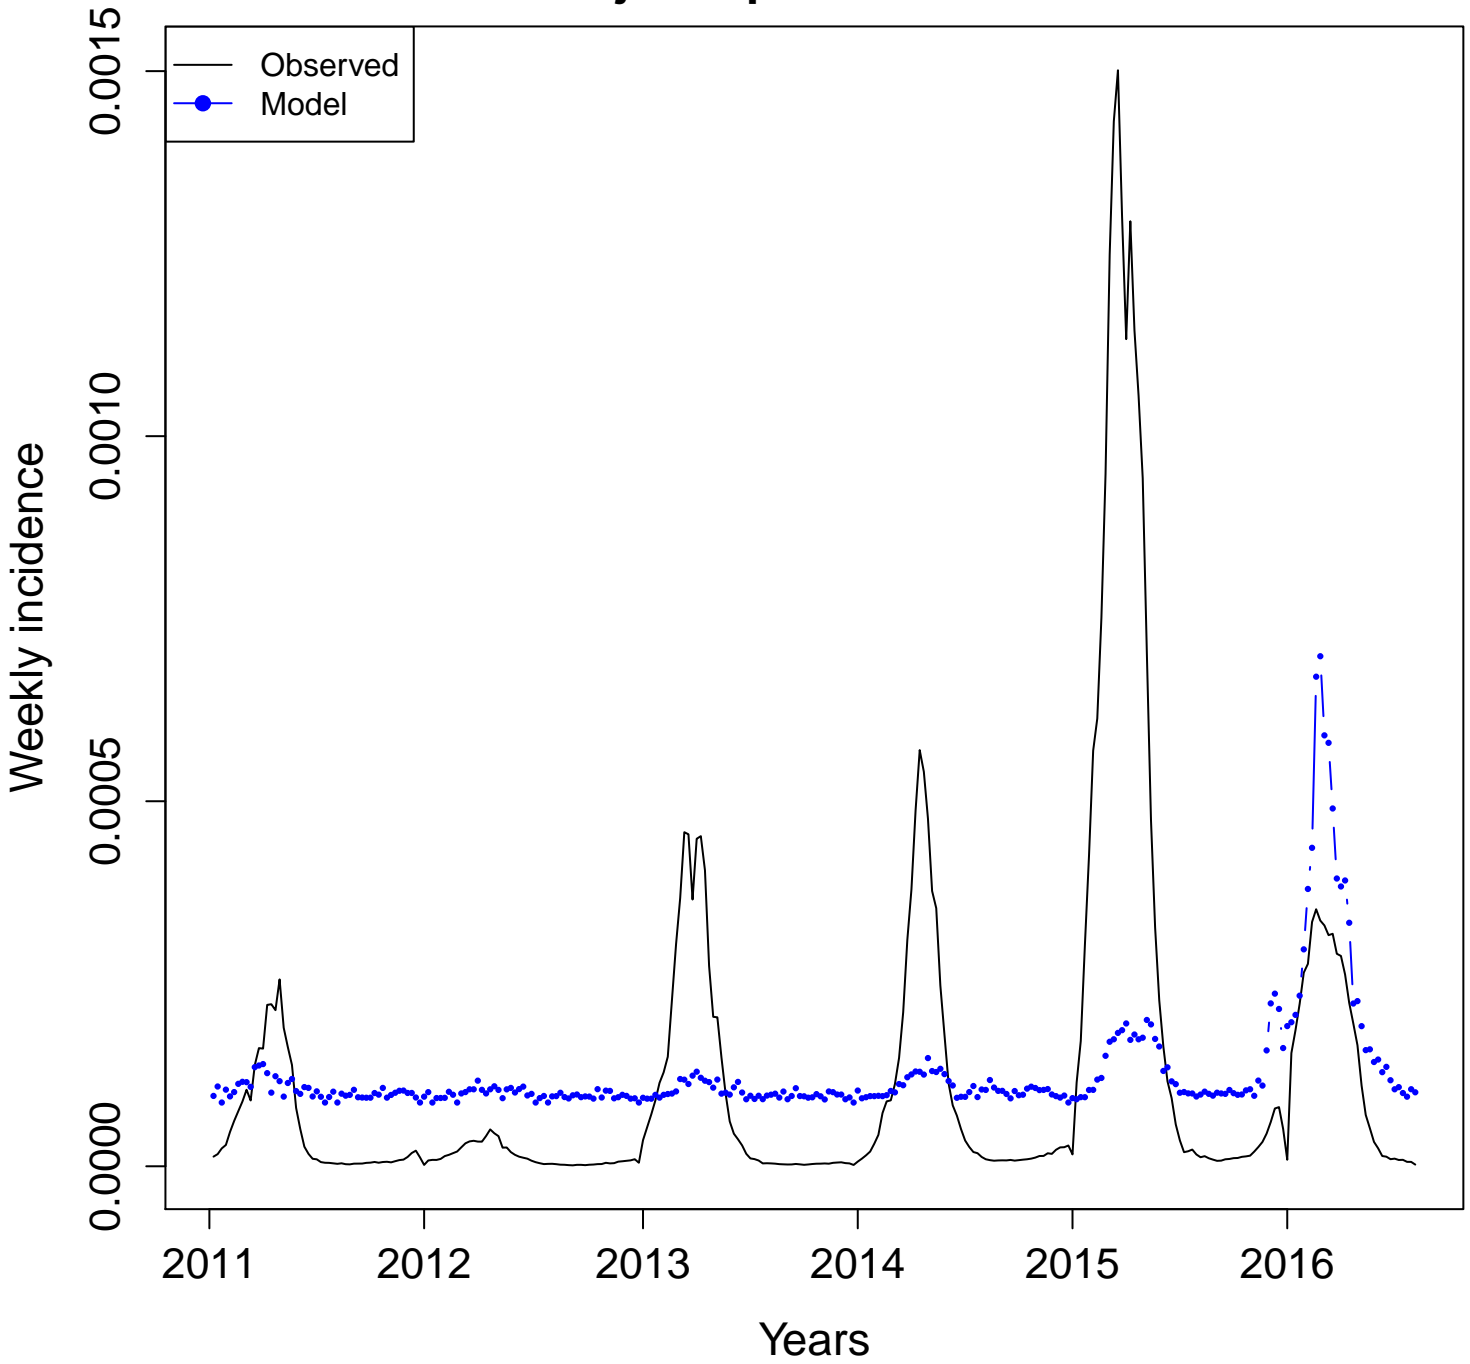

# SP- DHF

Adj. R squared = 0.0012

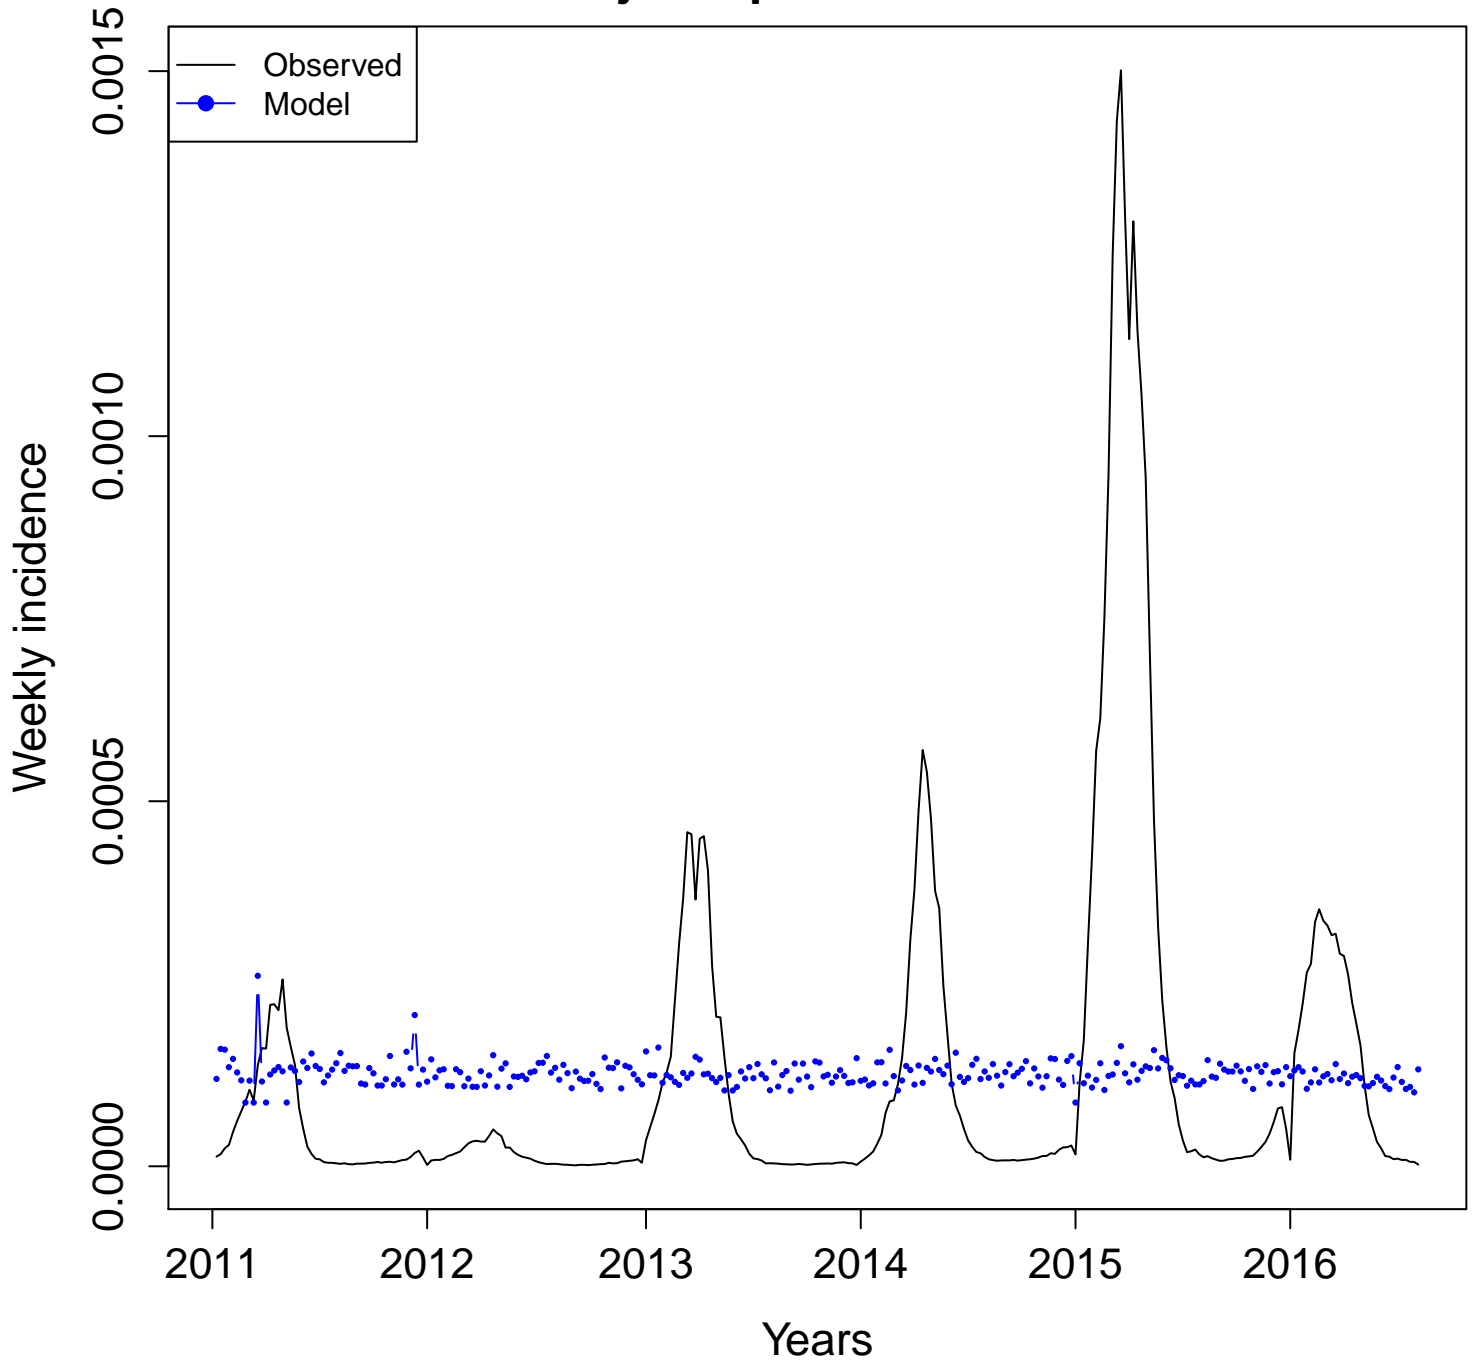

**SP- mosquito.dengue**  
**Adj. R squared = 0.7186**

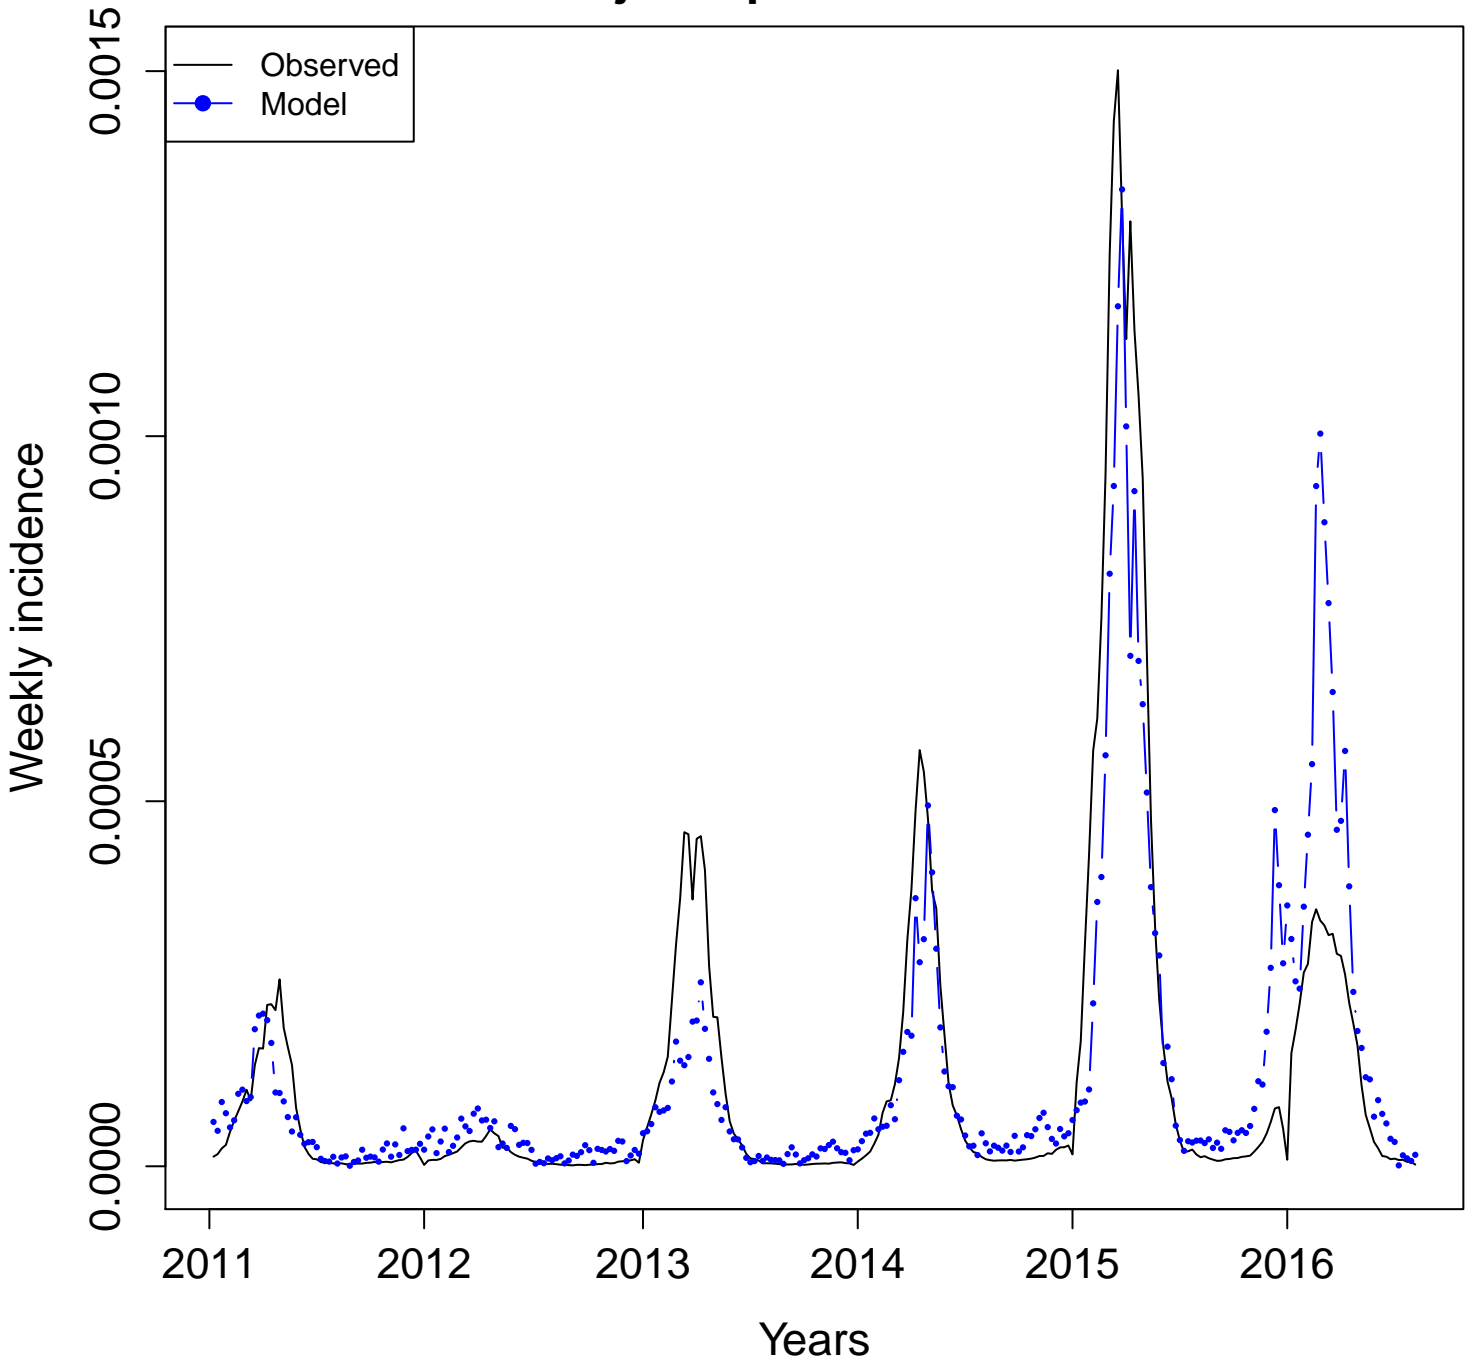

# SP- mosquito

Adj. R squared = 0.5507

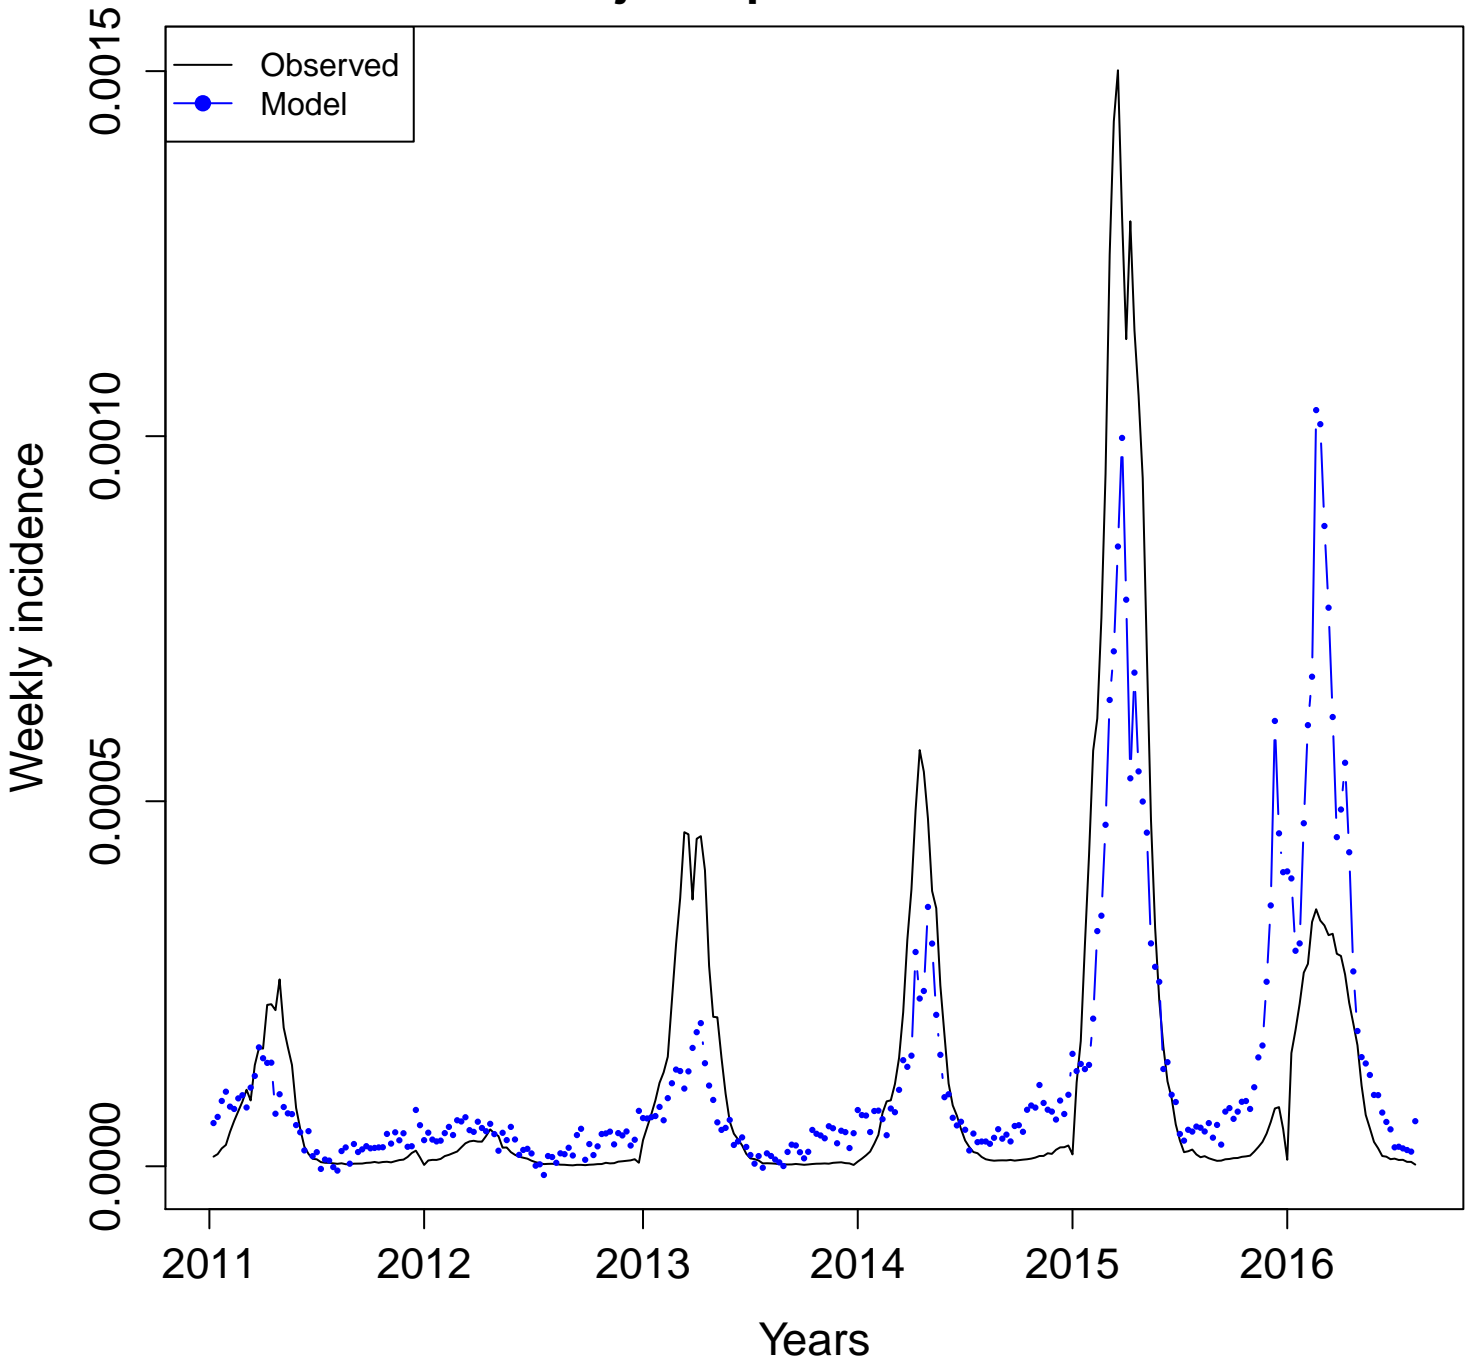

# SP- mosquitoes

Adj. R squared = -0.0012

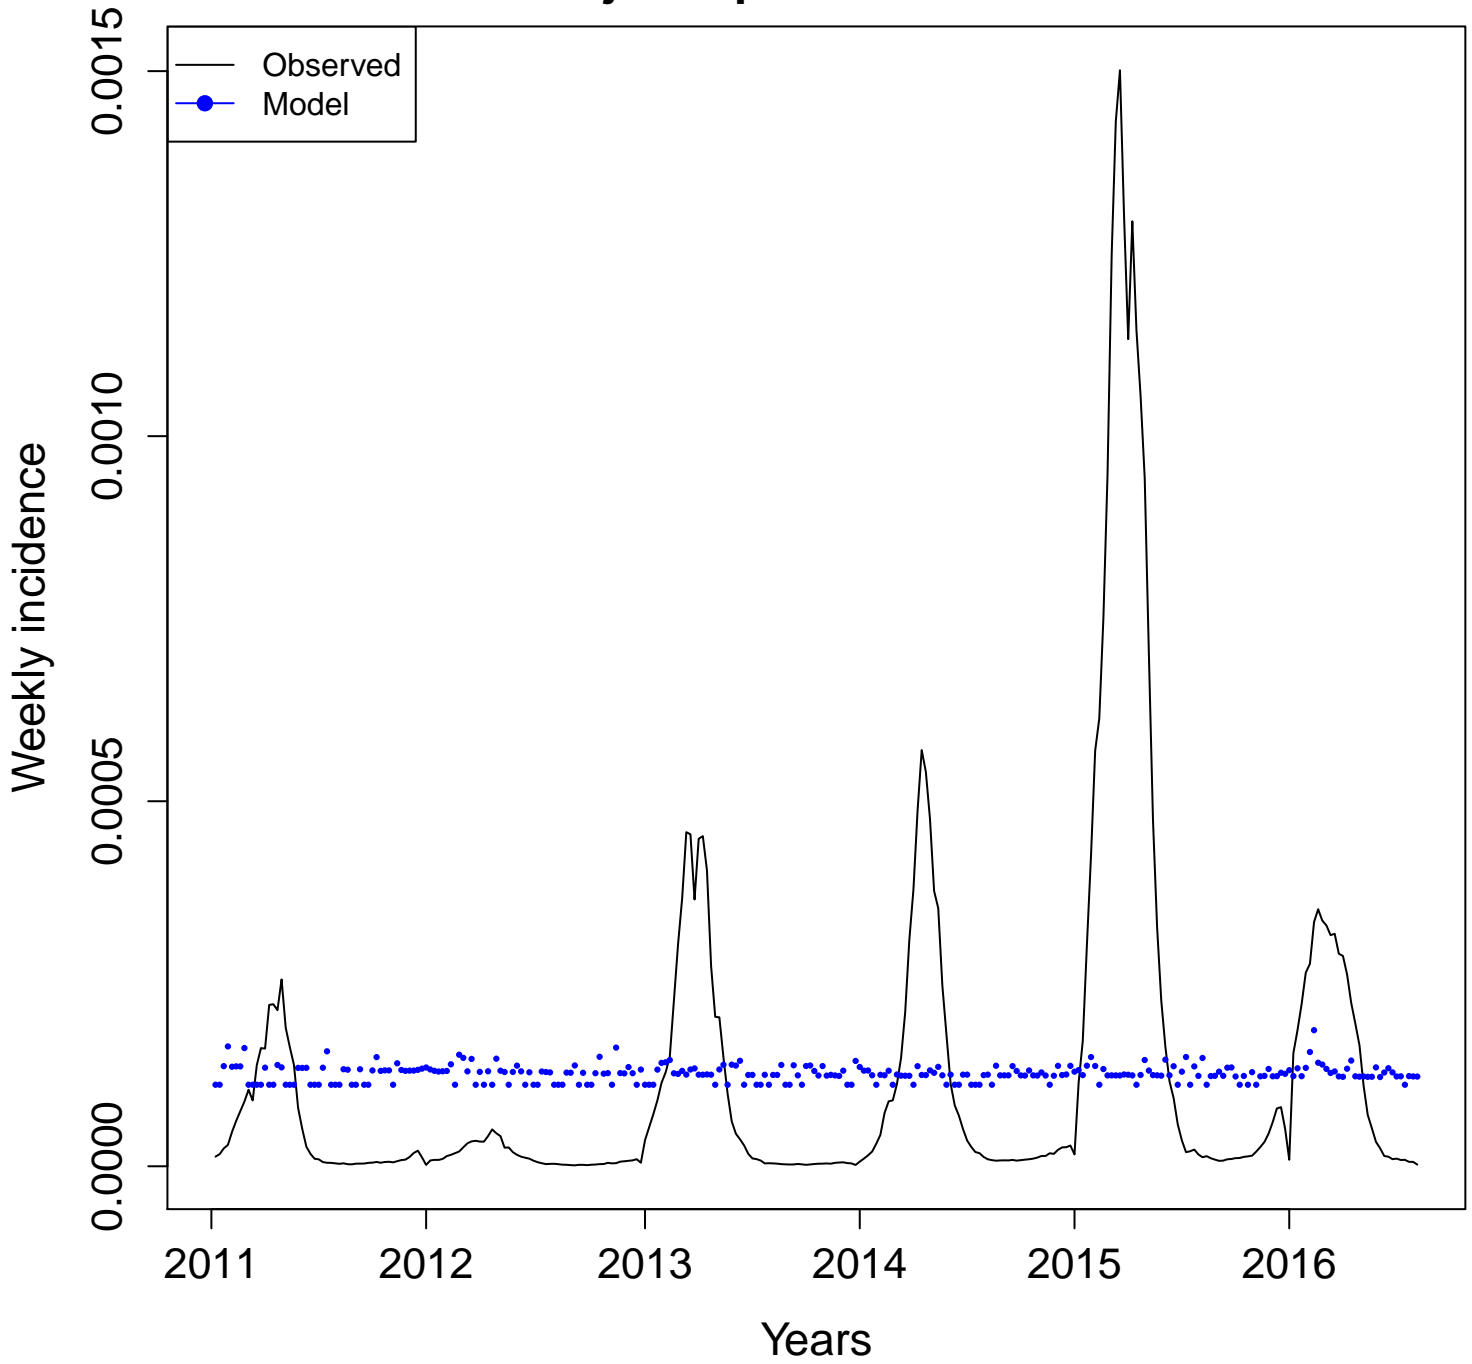



**SP- sintomas.da.dengue**  
**Adj. R squared = 0.8396**

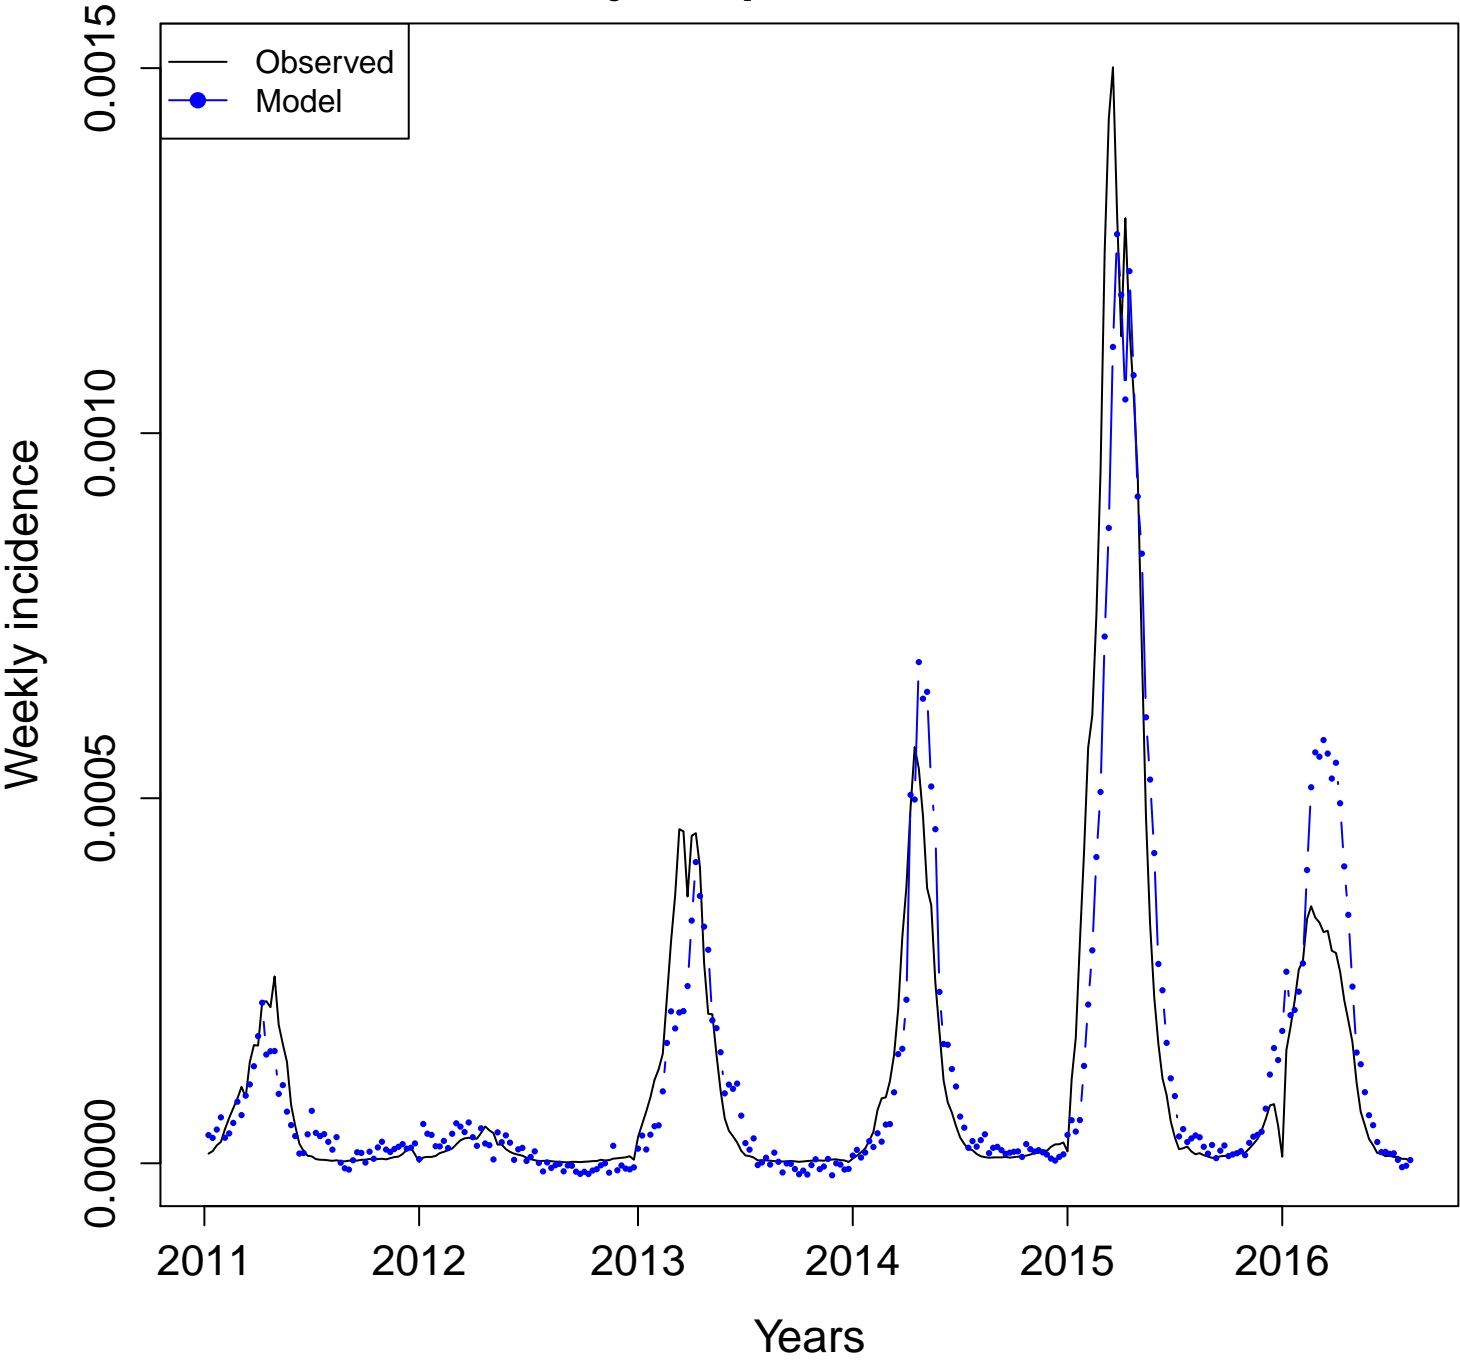

## Tocantins (TO)

# Dengue incidence vs. Google Health Trends (2011–2016)

### Definitions:

- **Combined terms:**
  - **All:** model with all the available terms.  $n =$  number of terms
  - **Four:** model with "dengue", "dengue sintomas", "aedes", and "mosquito".
  - **Uncorrelated:** model with non-correlated terms.  $n =$  number of uncorrelated terms
- **Individual terms:** Plots developed with one term at a time.
- Terms for all and uncorrelated models can be found in additional file 3.

**Combined terms**  
**Adjusted R squared**

**Tocantins (TO)**

**All**  
**(n = 8)**

**BR-TO**  
**Adj. R squared = 0.4151**

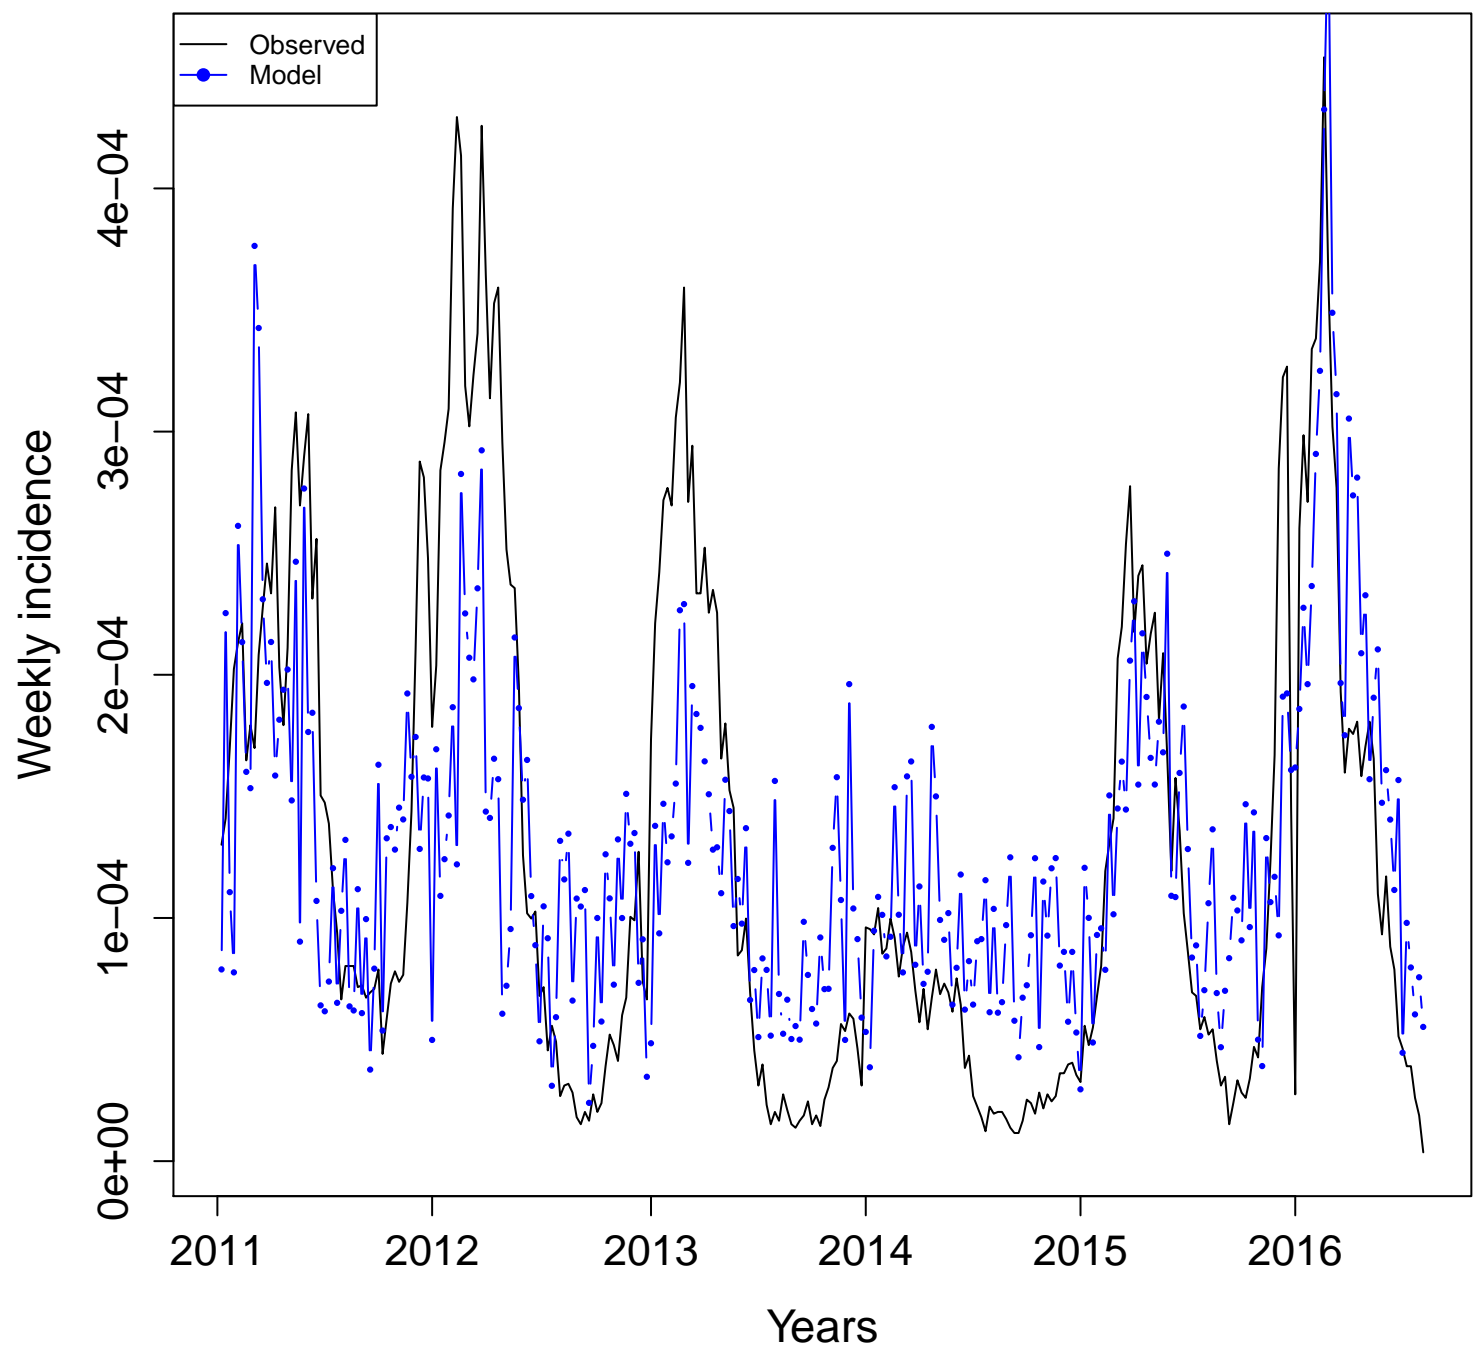

**BR-TO**  
**Adj. R squared = 0.4009**

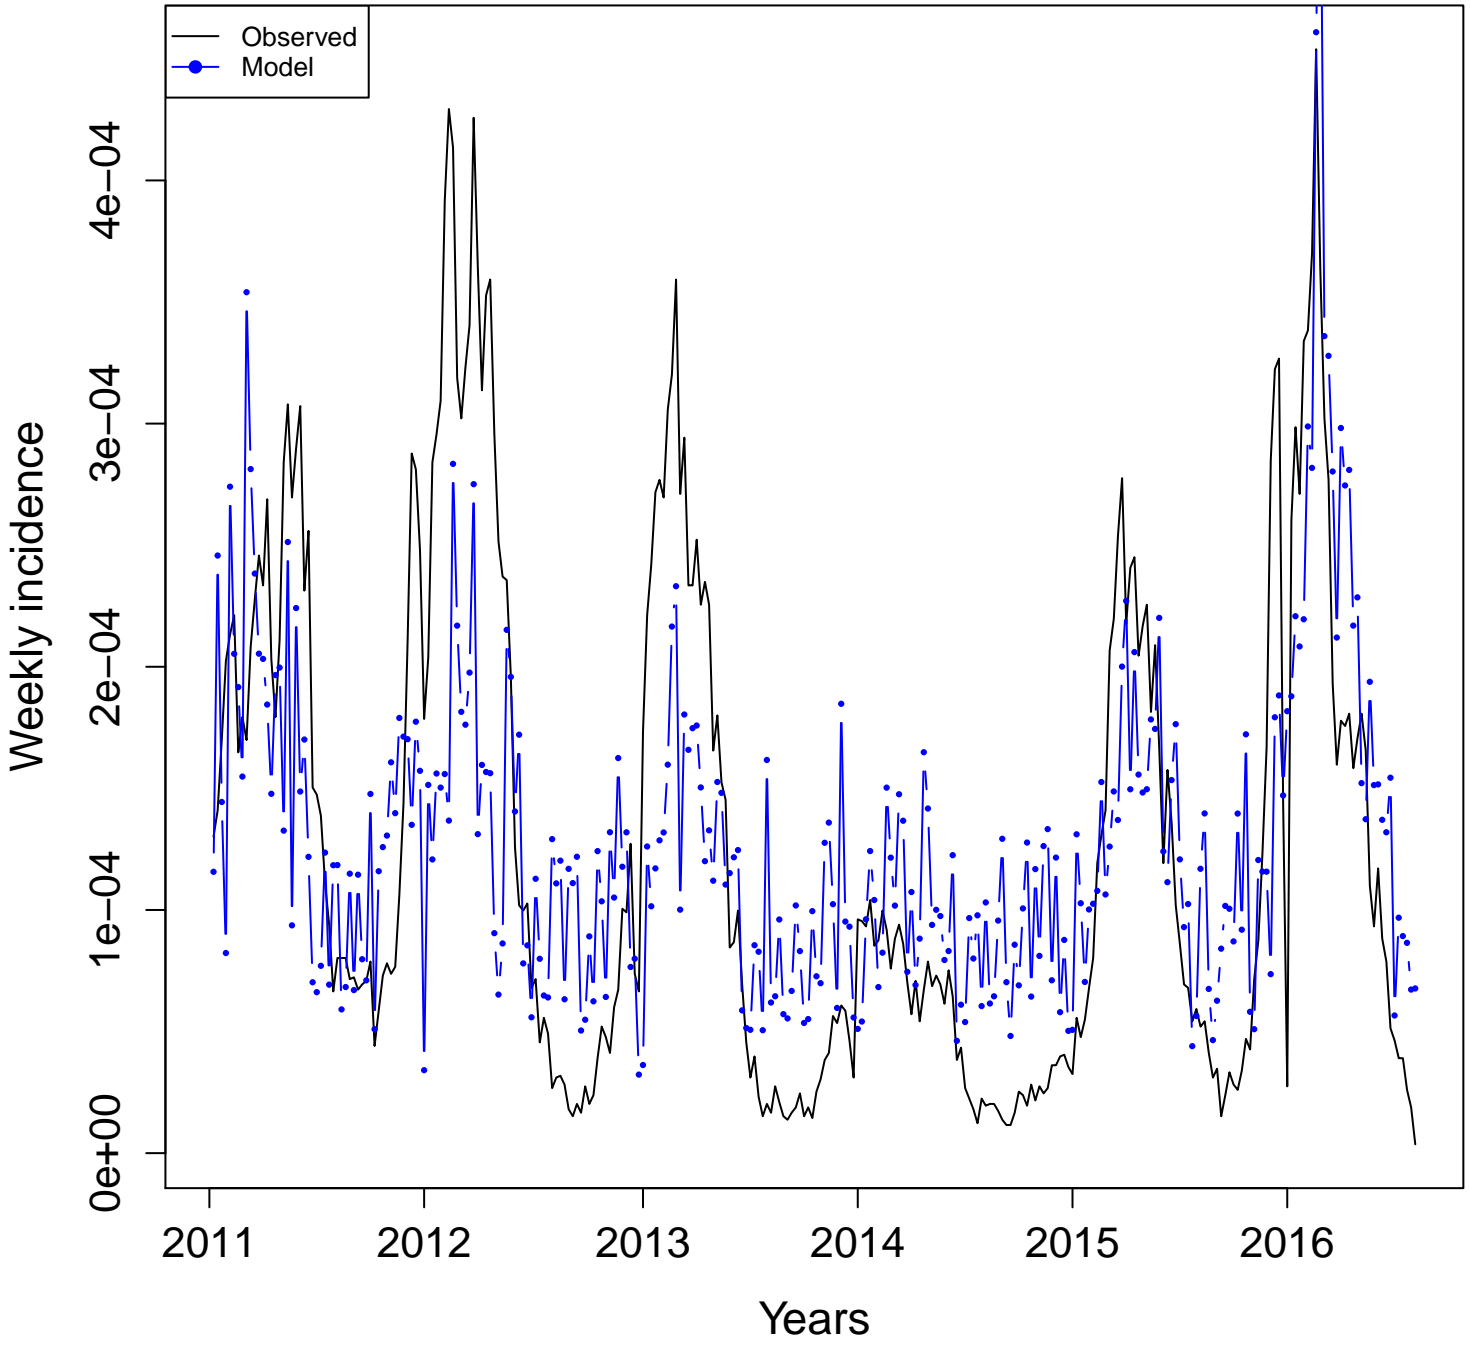

**Uncorrelated  
(n = 3)**

**BR-TO  
Adj. R squared = 0.3415**

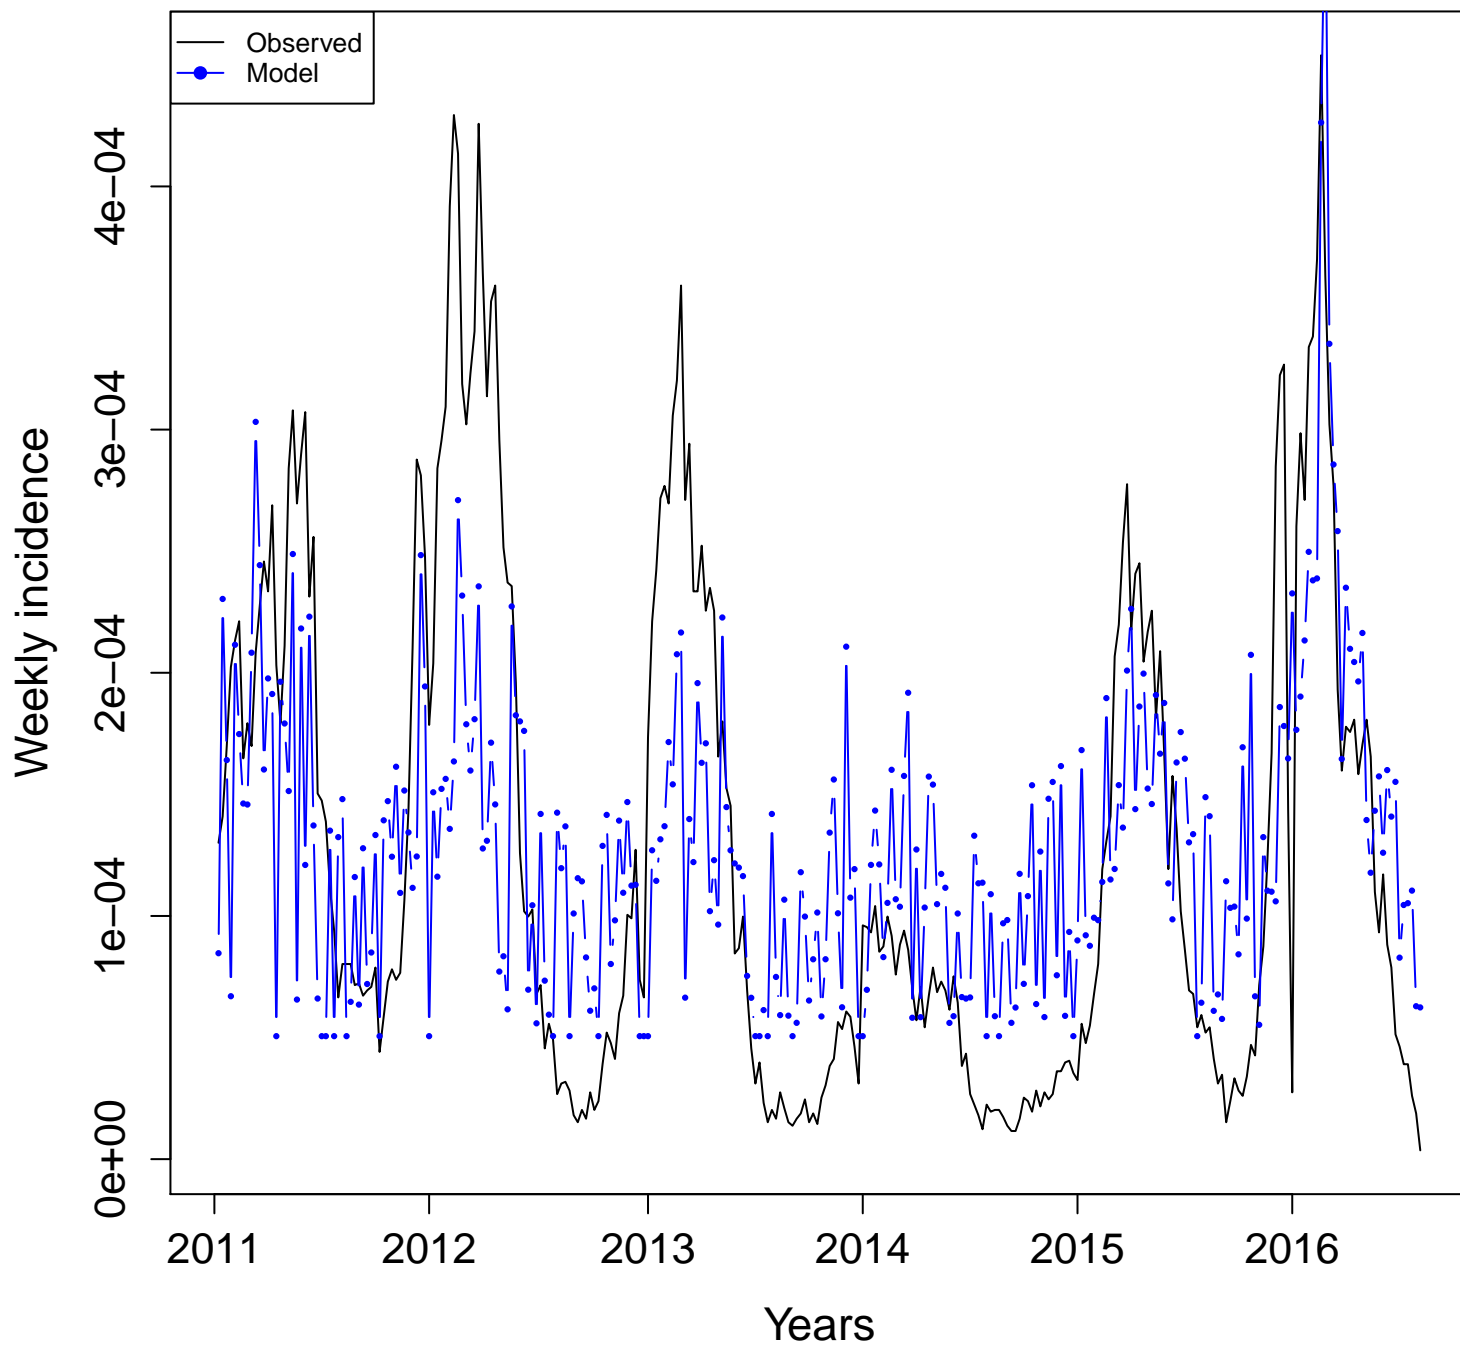

**Individual terms**  
**Adjusted R squared**

**Tocantins (TO)**

**TO- aedes.aegypti**  
**Adj. R squared = 0.113**

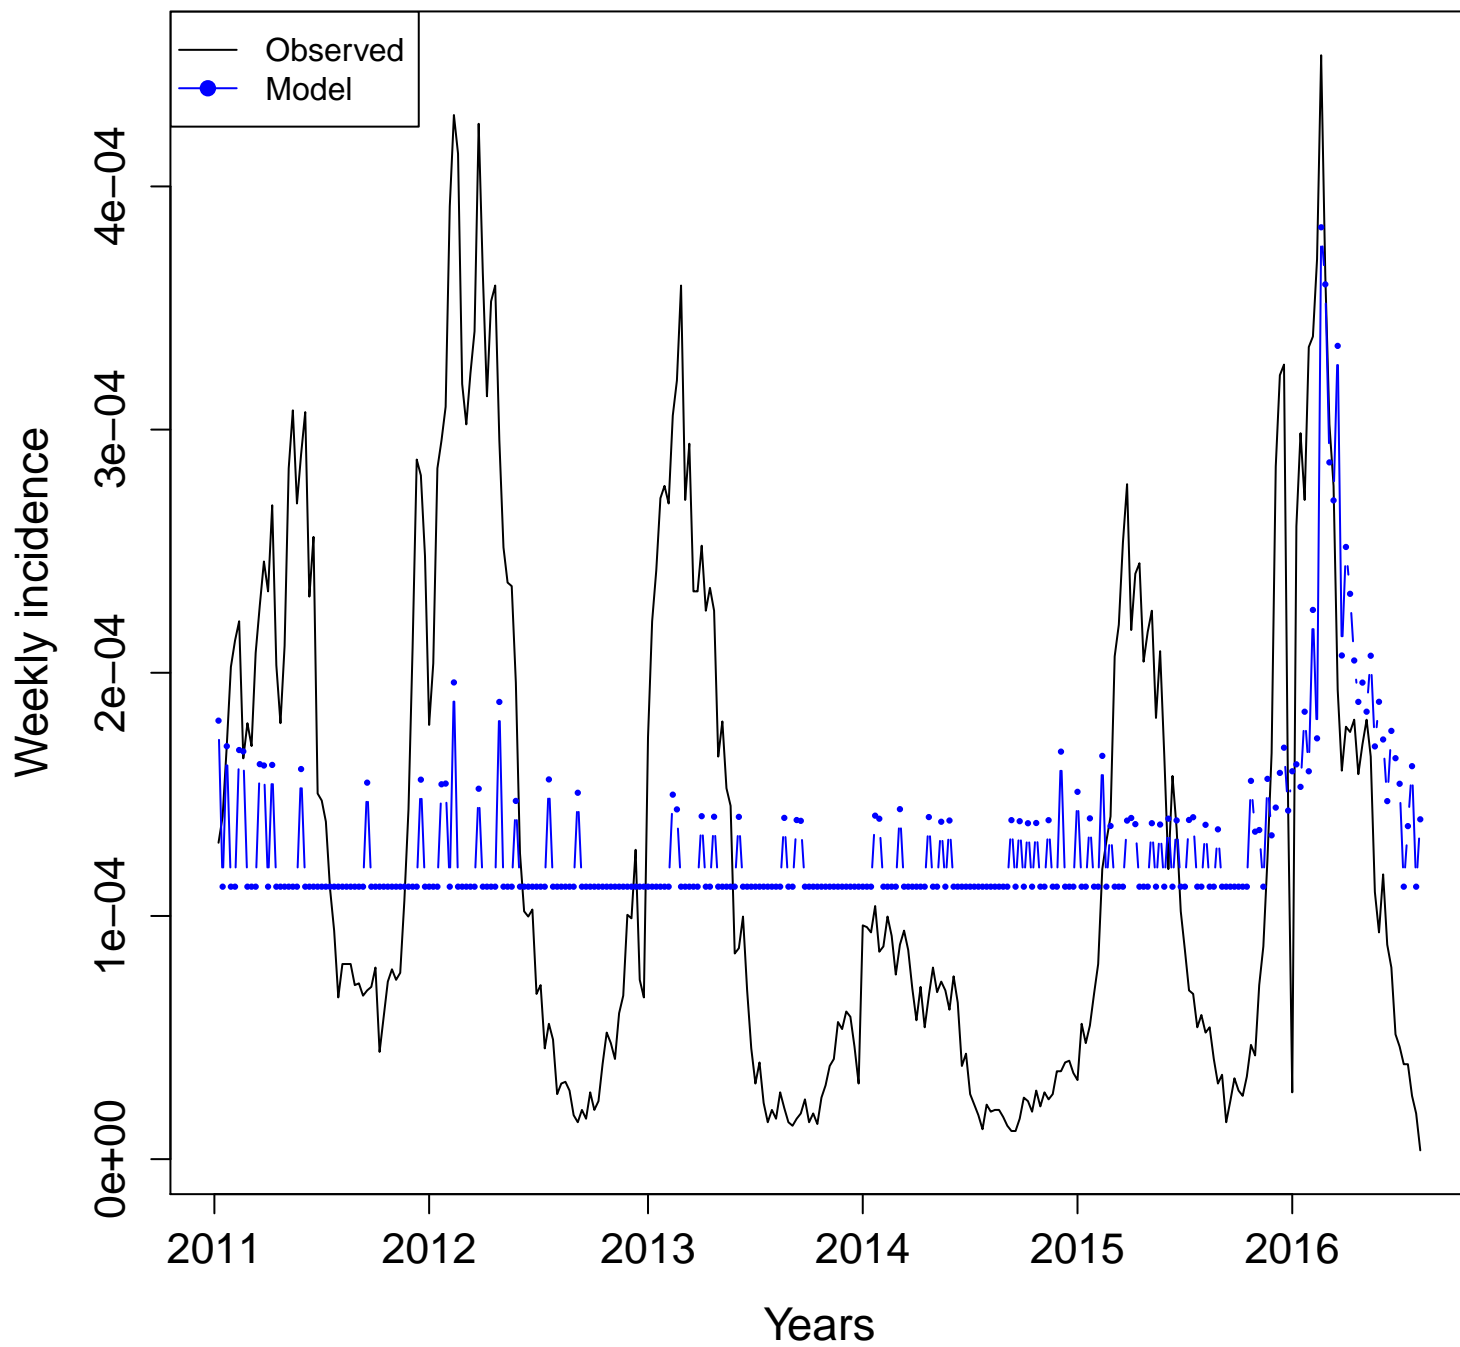



**TO- aedes**  
**Adj. R squared = 0.1808**

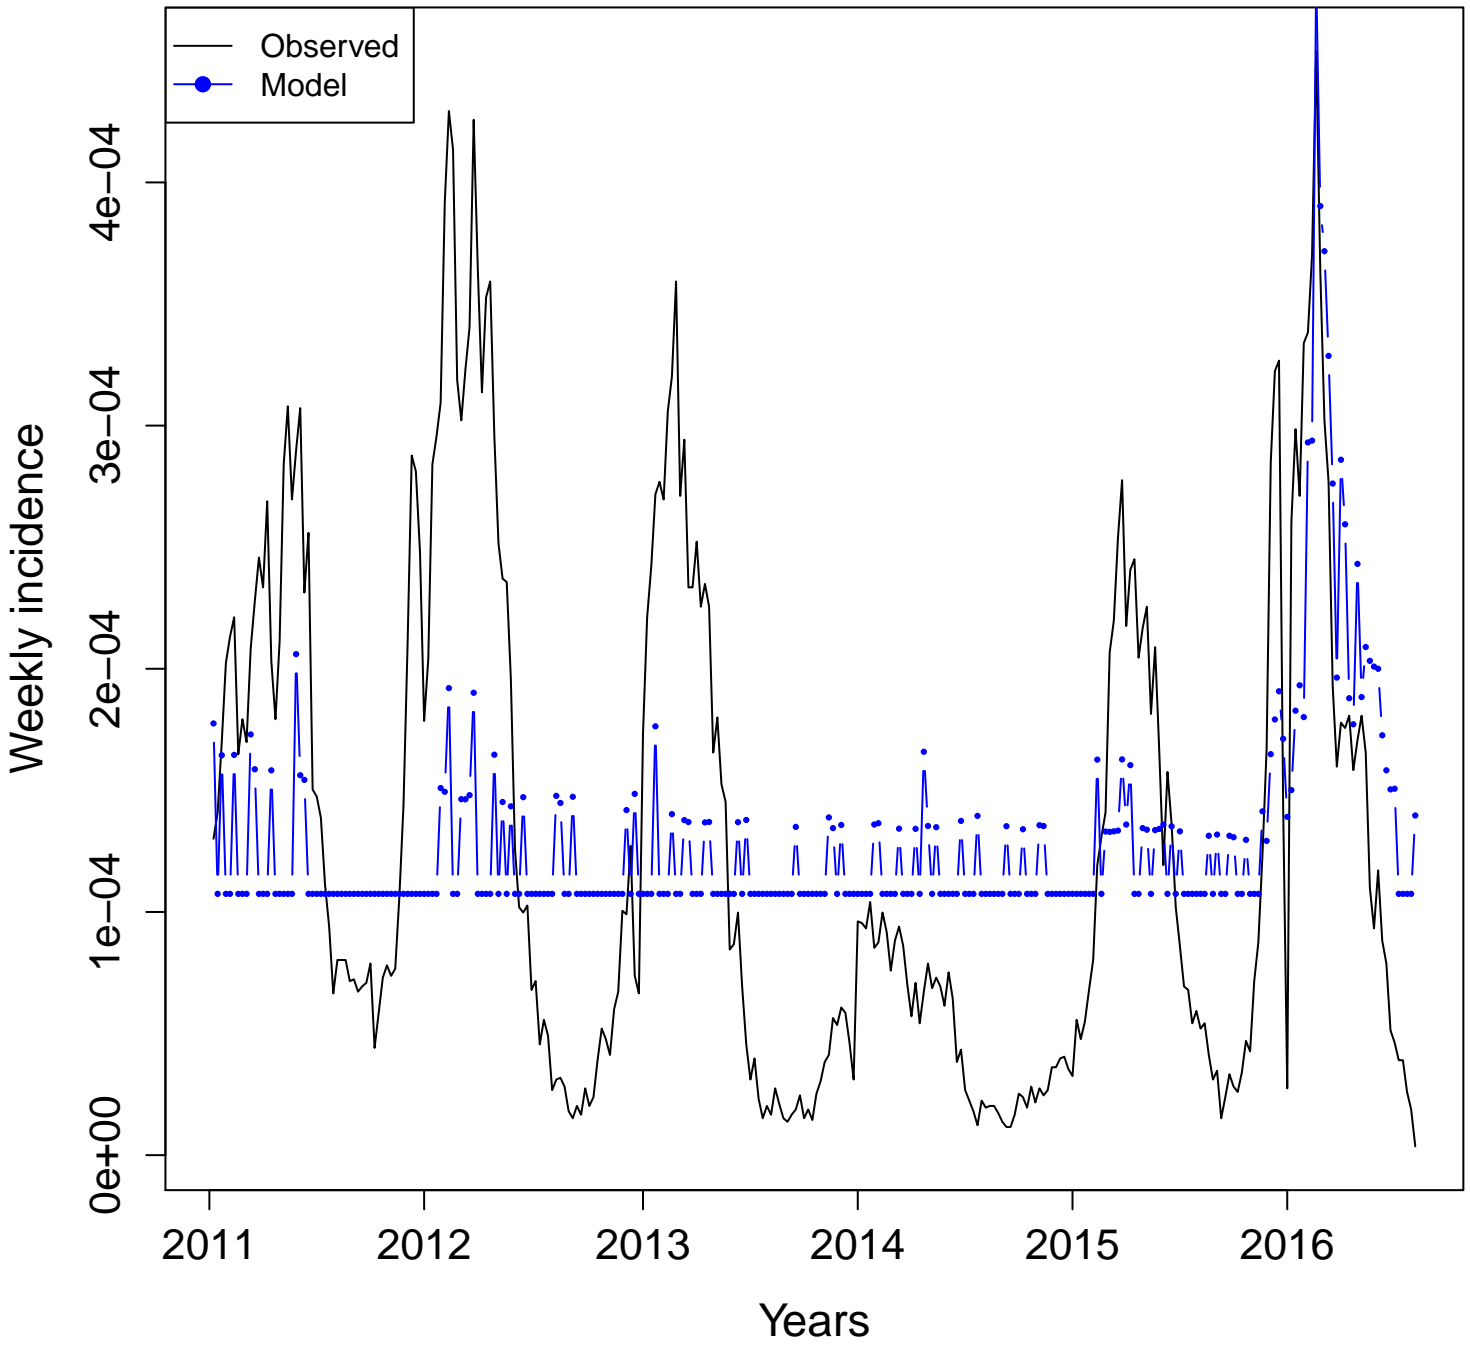

**TO- aegypti**  
**Adj. R squared = 0.1144**

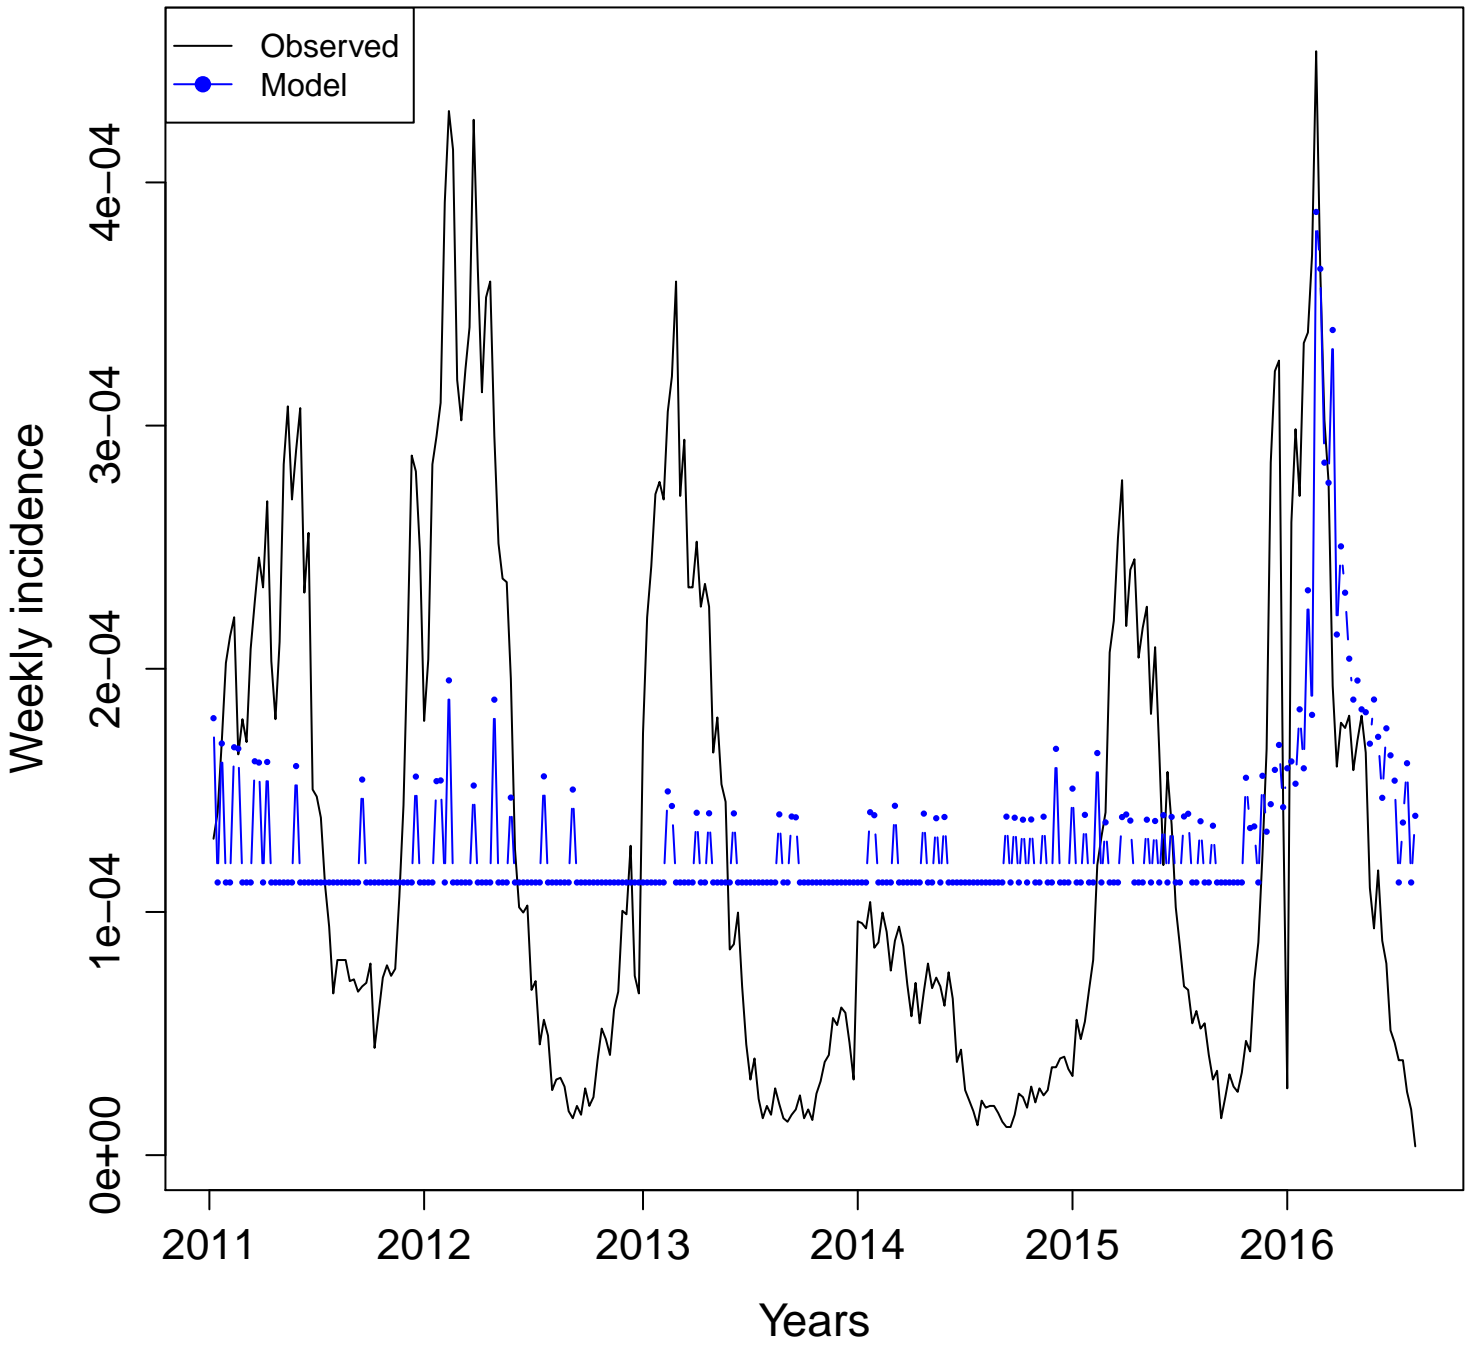

# TO- dengue

Adj. R squared = 0.3133

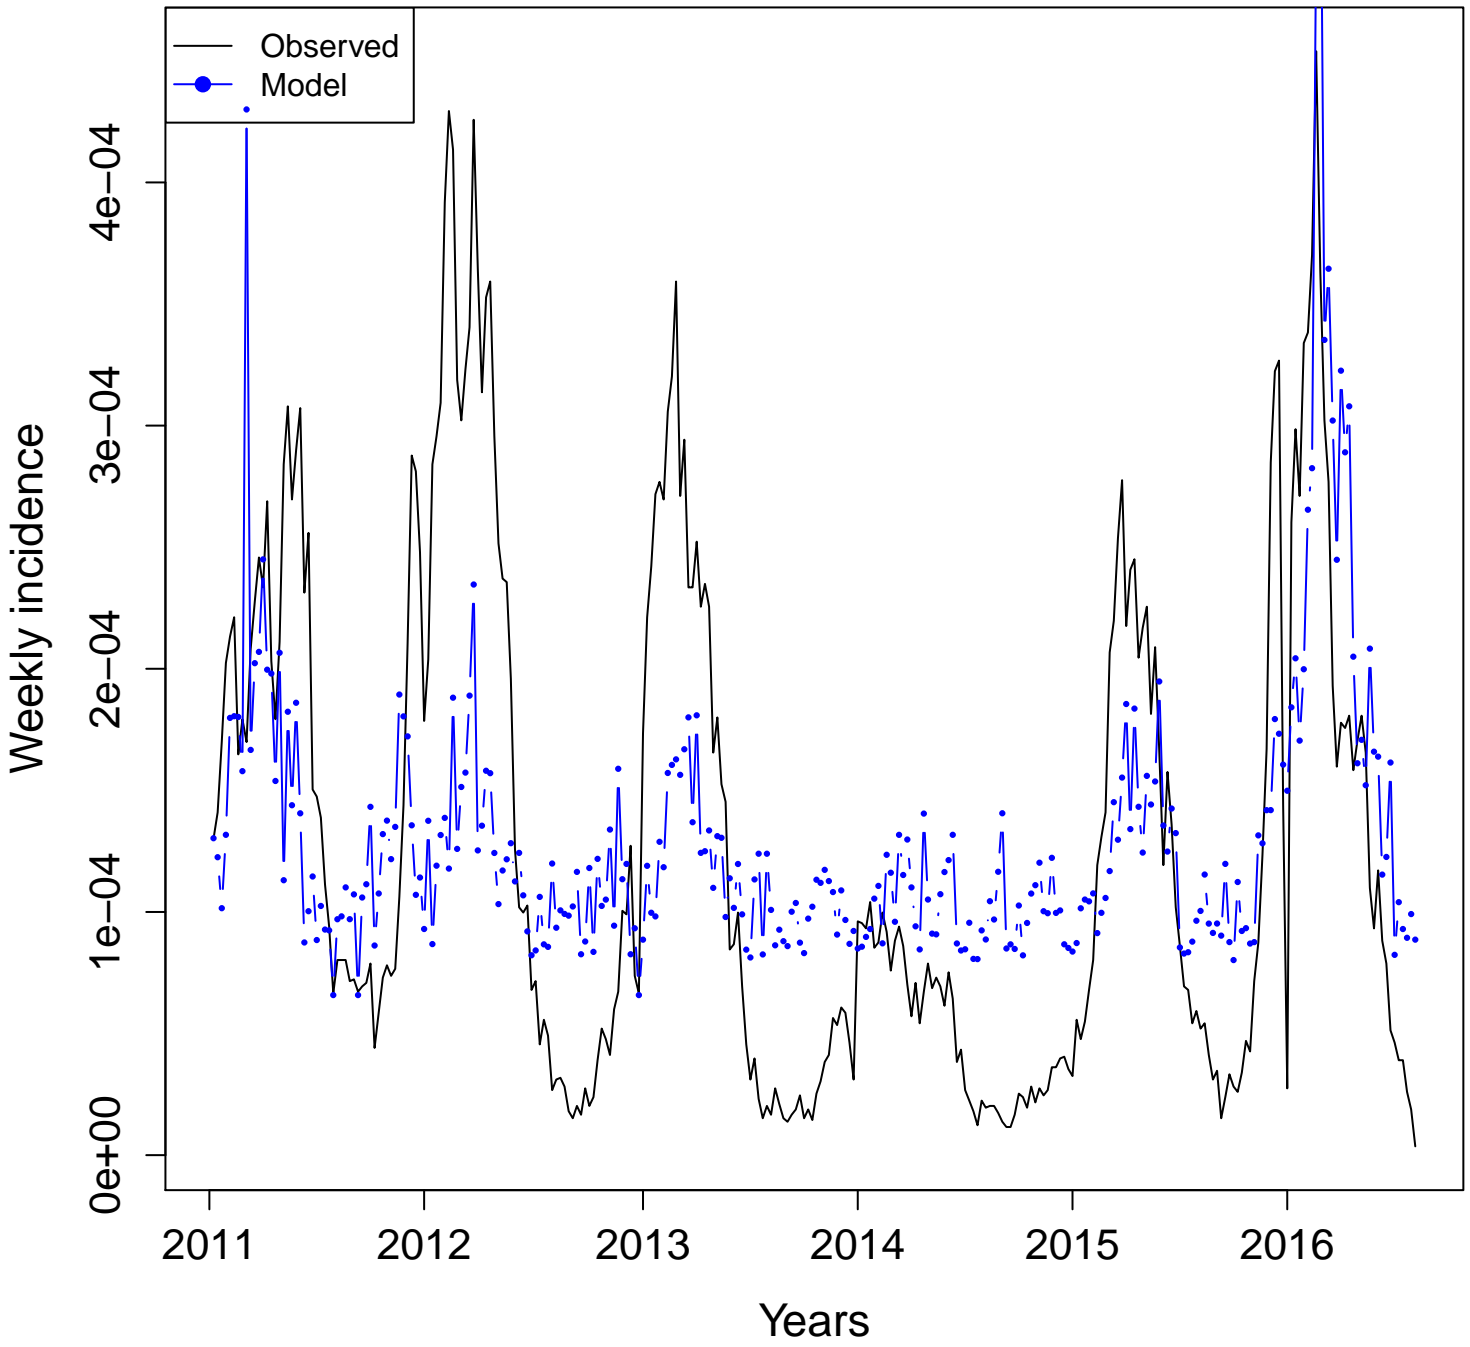

**TO- dengue.sintomas**  
**Adj. R squared = 0.303**

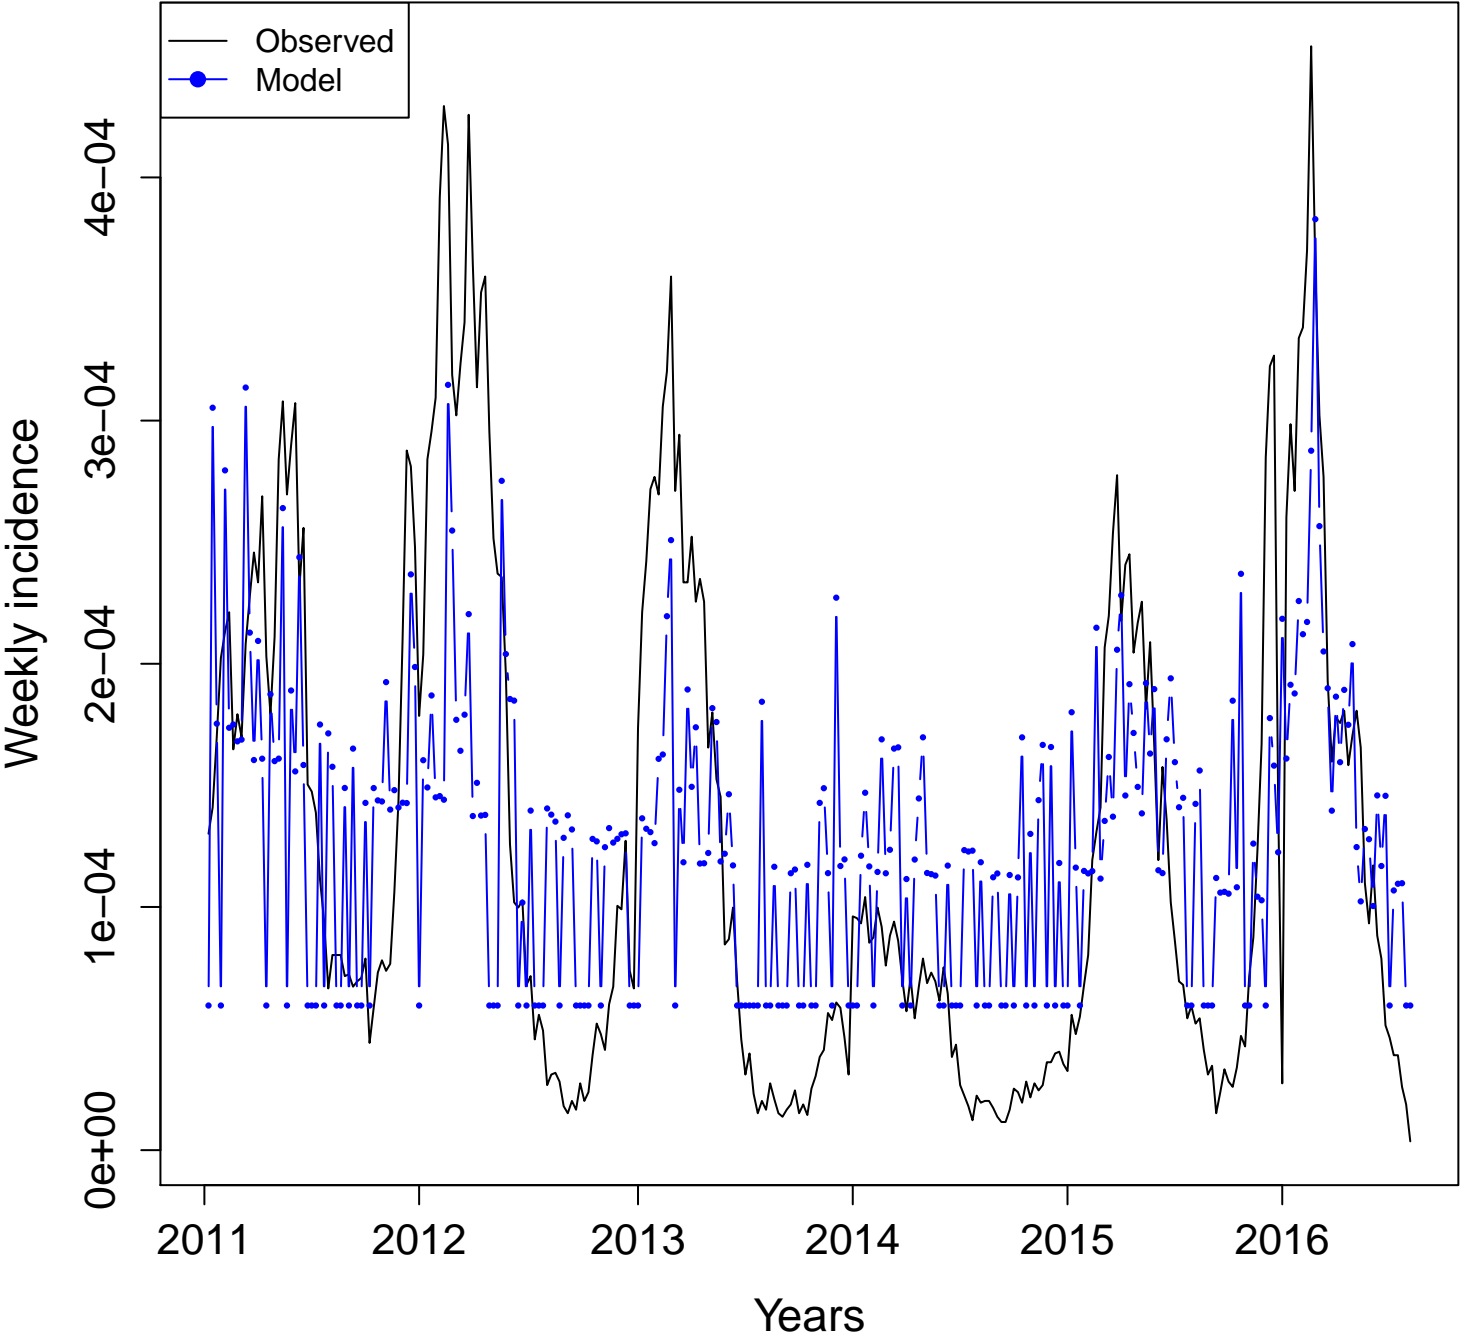

**TO- mosquito.dengue**  
**Adj. R squared = 0.15**

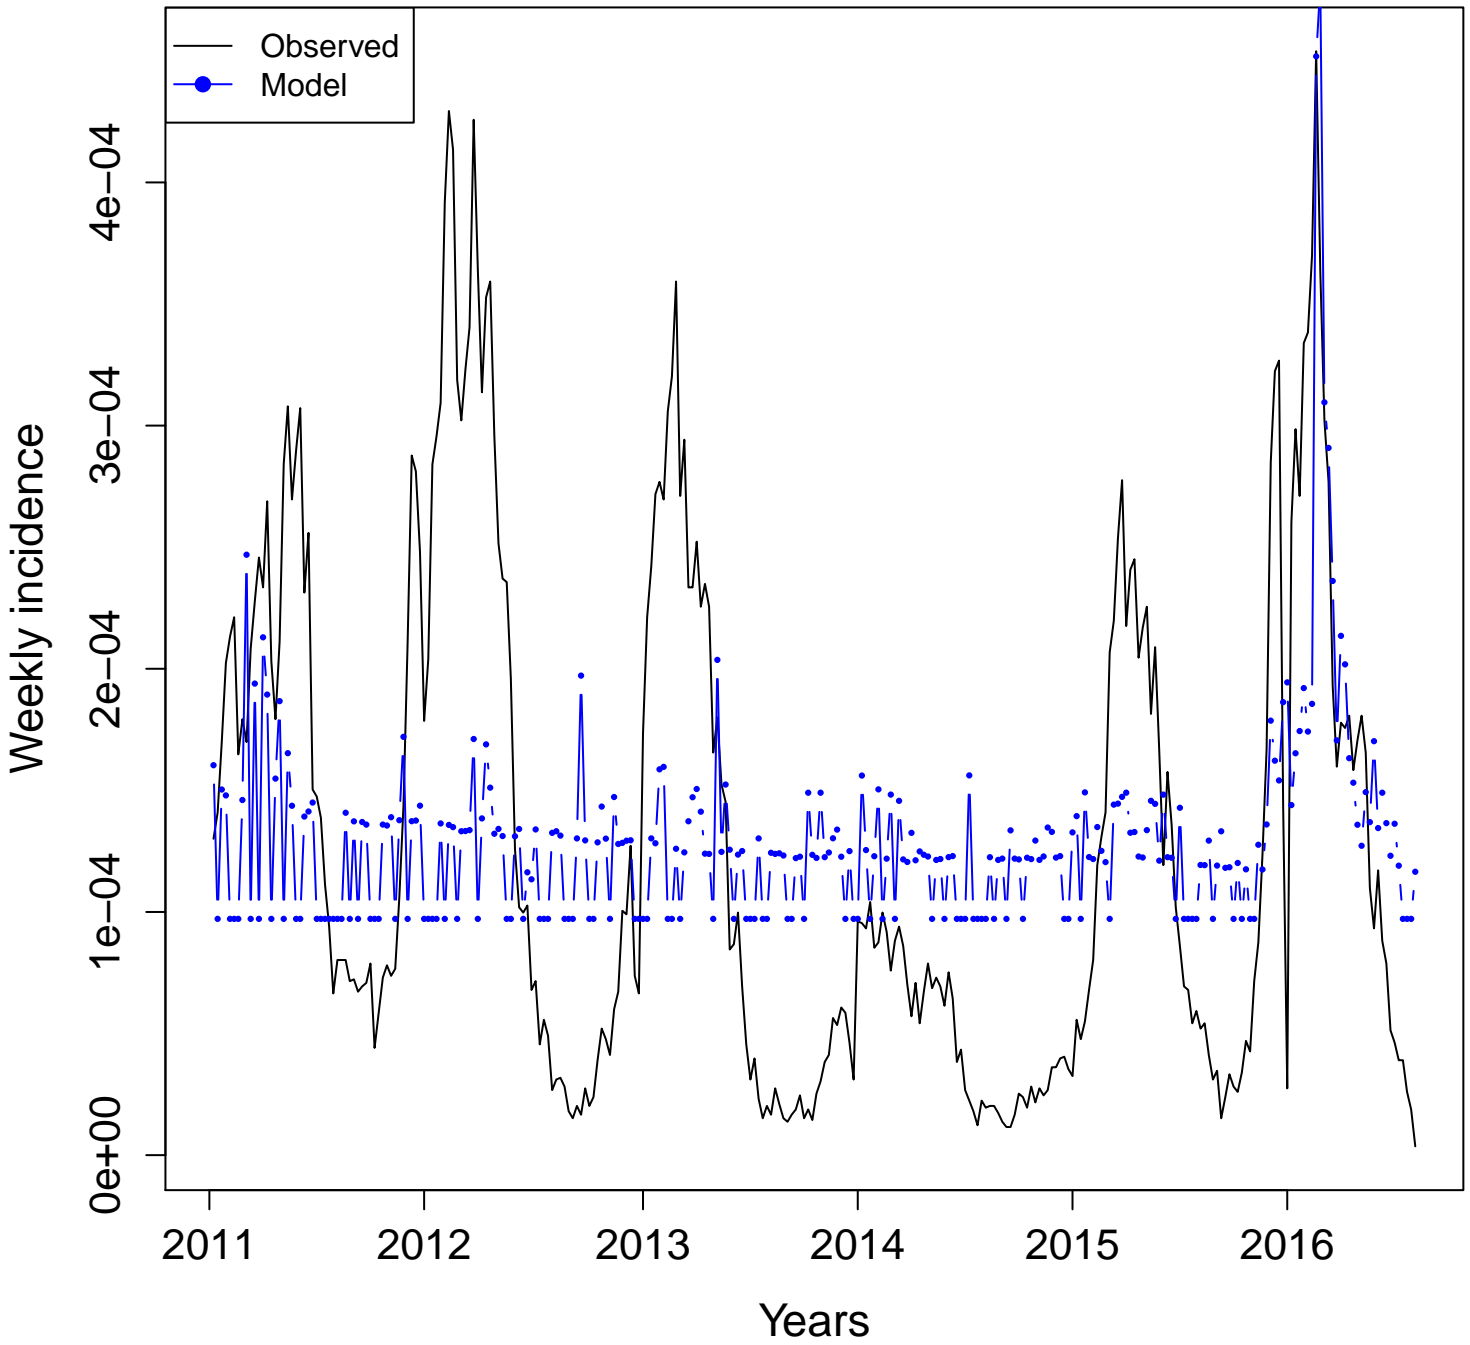

# TO- mosquito

Adj. R squared = 0.1681

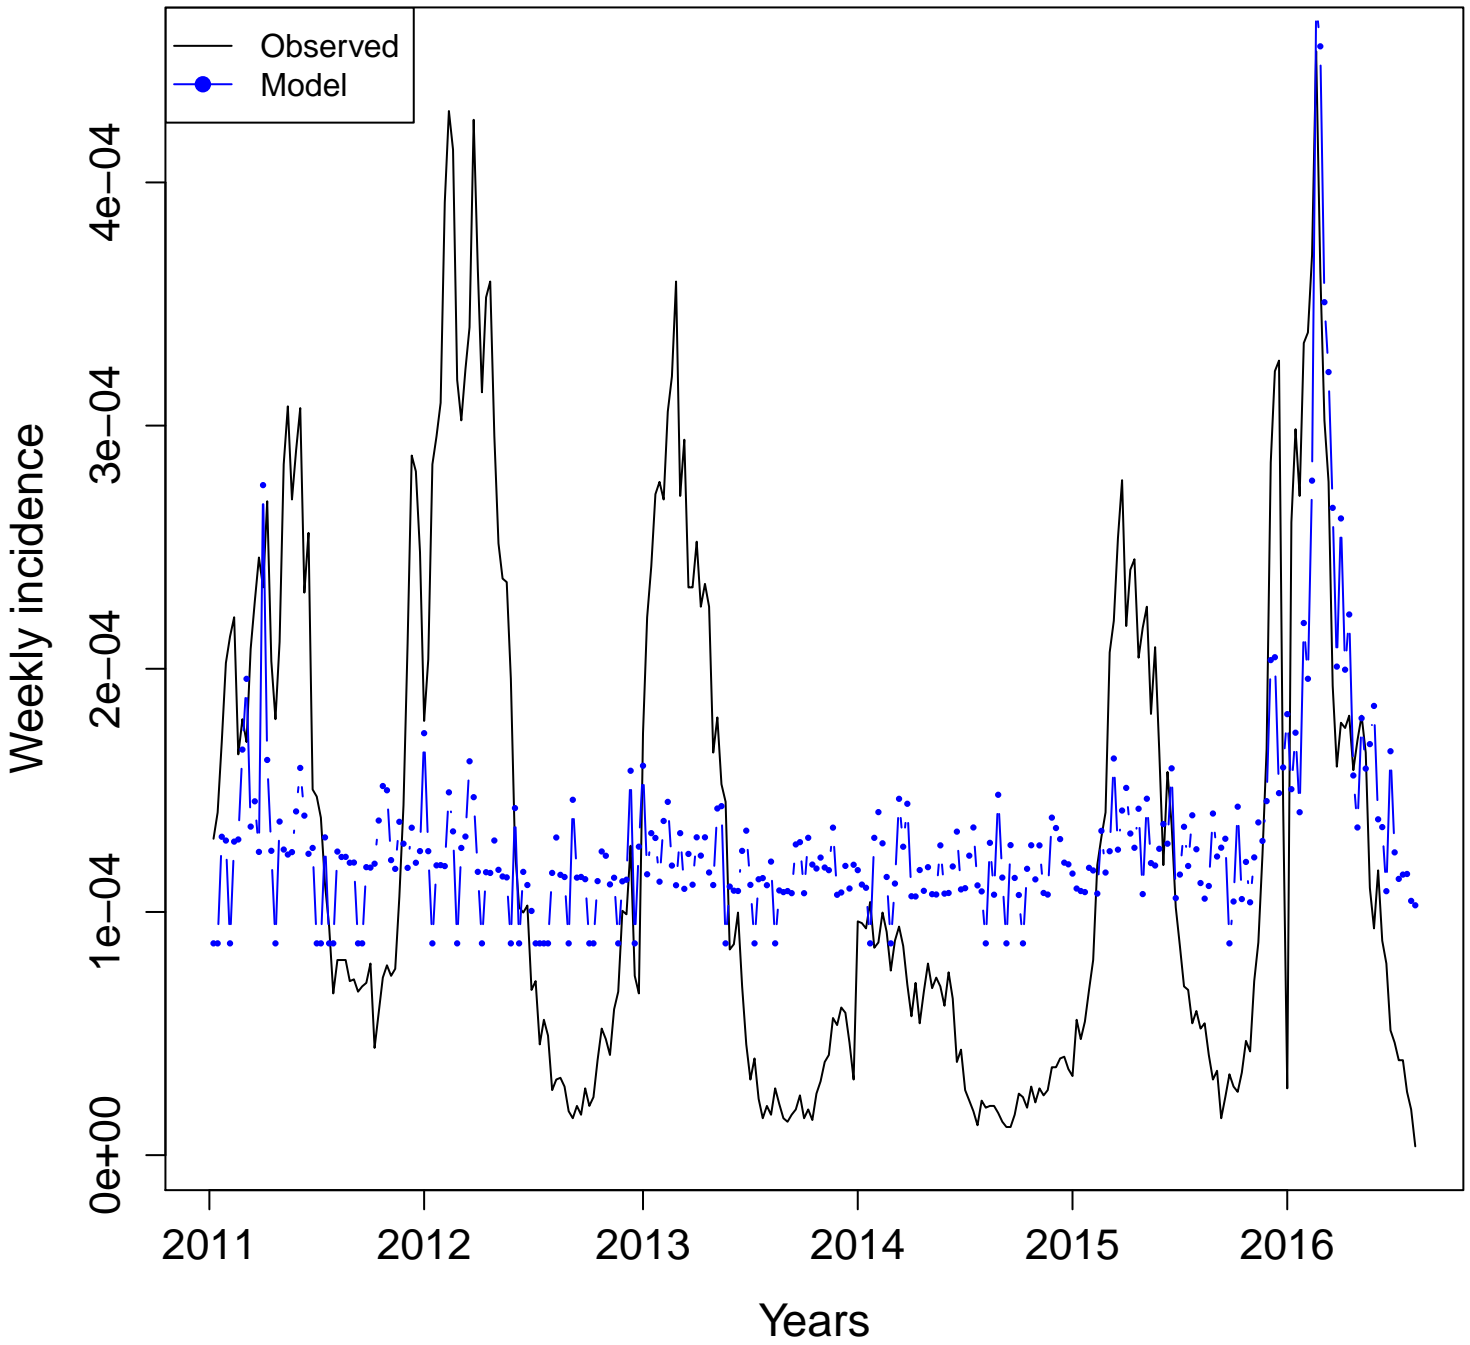

**TO- sintomas.da.dengue**  
**Adj. R squared = 0.1842**

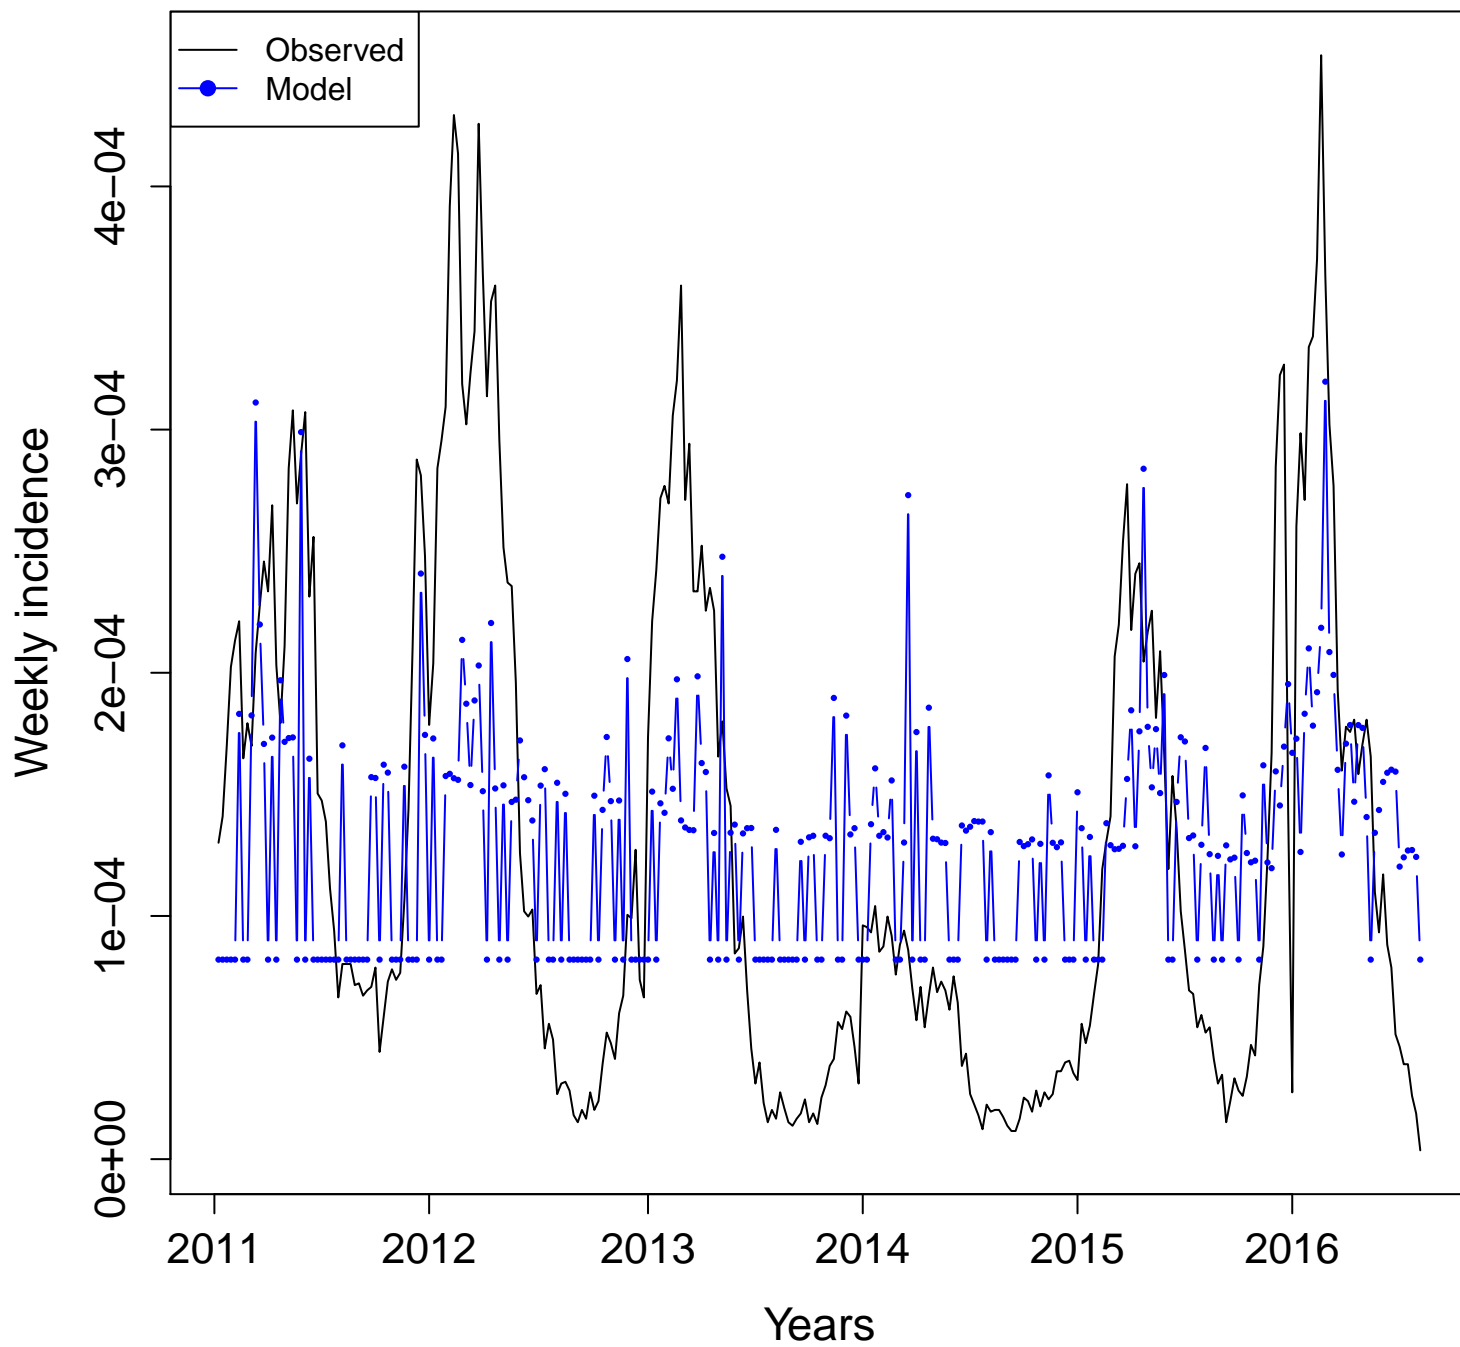

Supplement: MOESM5 [file 17844634]
